# Supplementary material
Source: PubMed Central journal article supplement (PMC7077032)

## **Supplemental Datafile 2: Analyses related to Main Text Figure 3**

P-M plots for 146 LD-independent genome-wide significant loci.

Fig SD2

rs4702 (Meta  $P = 2.46 \times 10^{-11}$ )

Gene : *FURIN*, *FES*

GWAS P-value

- 2.55 x 10<sup>-12</sup> ● 1.SCZ
- 0.0007 ● 2.BIP
- 0.0004 ● 3.MD
- 0.1043 ● 4.ASD
- 0.0023 ● 5.ADHD
- 0.9832 ● 6.TS
- 0.4189 ● 7.ANO
- 0.9787 ● 8.OCD

FE summary

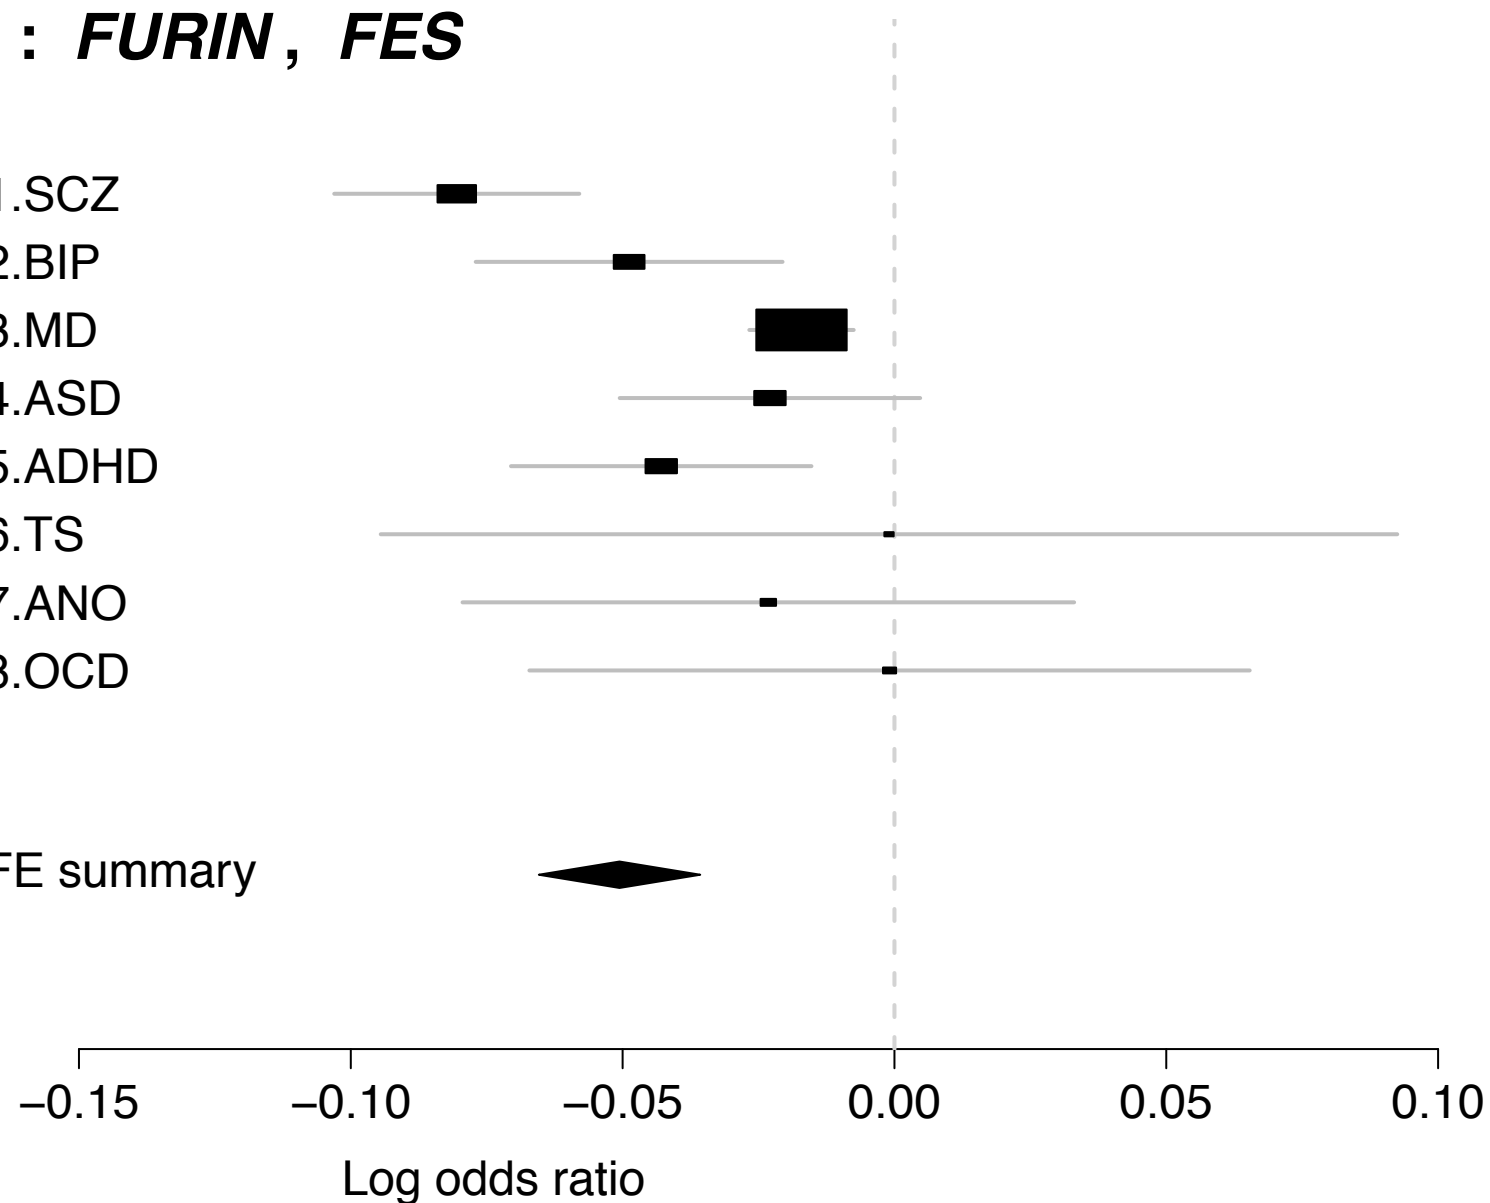

PM-Plot

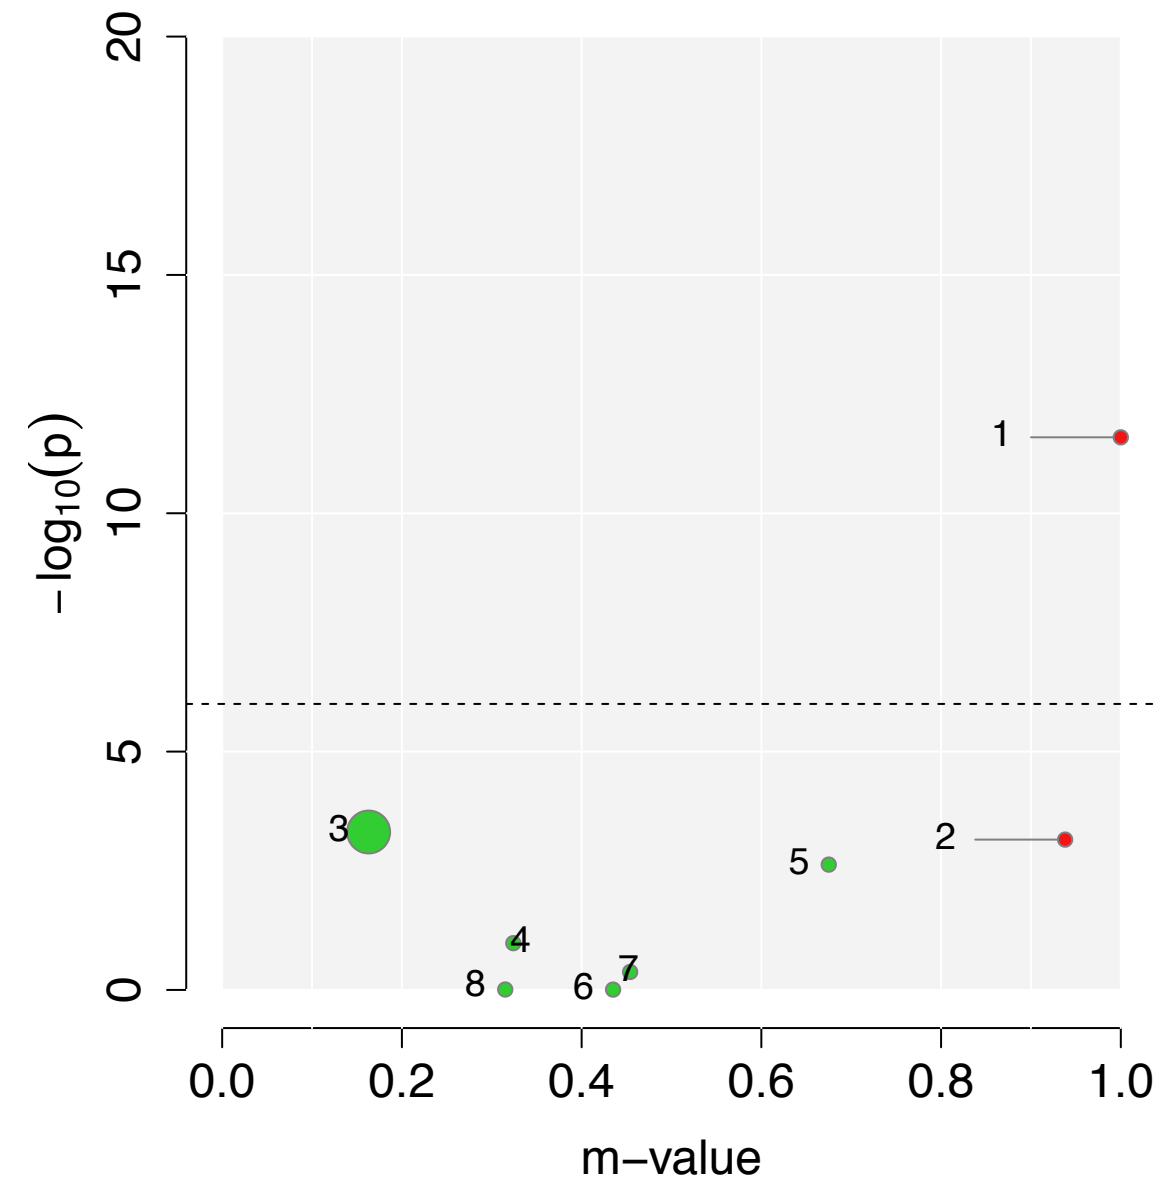

# rs12552 (Meta $P = 1.25 \times 10^{-18}$ )

Gene : *OLFM4*

## GWAS P-value

- 0.6012 ● 1.SCZ
- 0.0191 ● 2.BIP
- $4.00 \times 10^{-19}$  ● 3.MD
- 0.0215 ● 4.ASD
- 0.0214 ● 5.ADHD
- 0.1894 ● 6.TS
- 0.7859 ● 7.ANO
- 0.6274 ● 8.OCD

FE summary

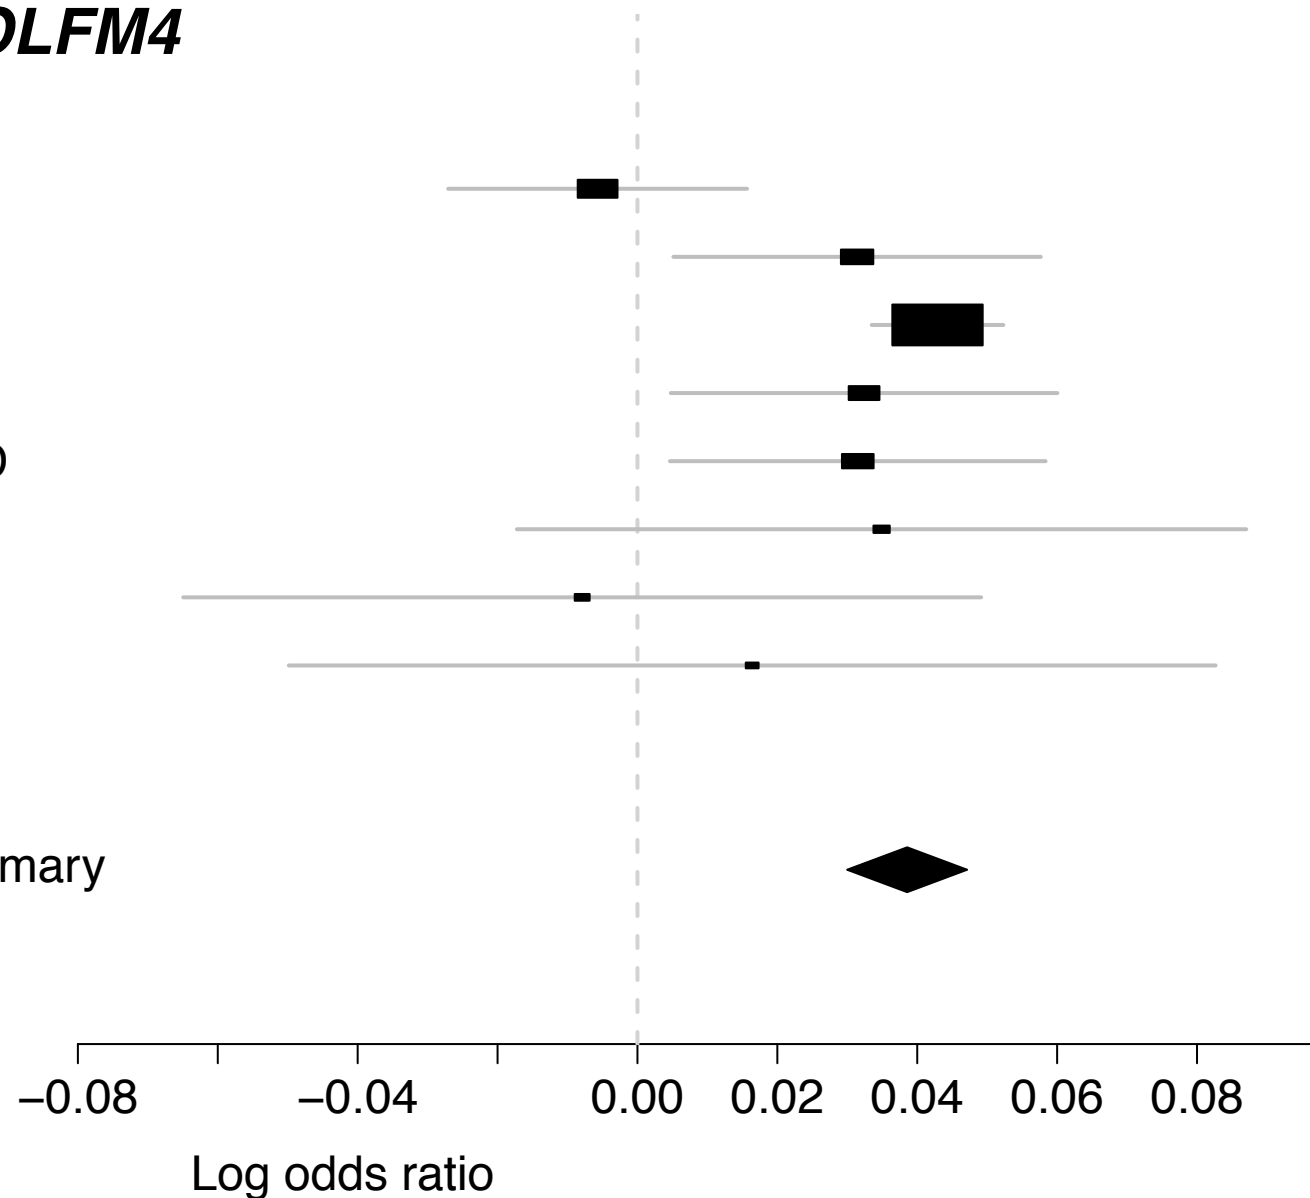

## PM-Plot

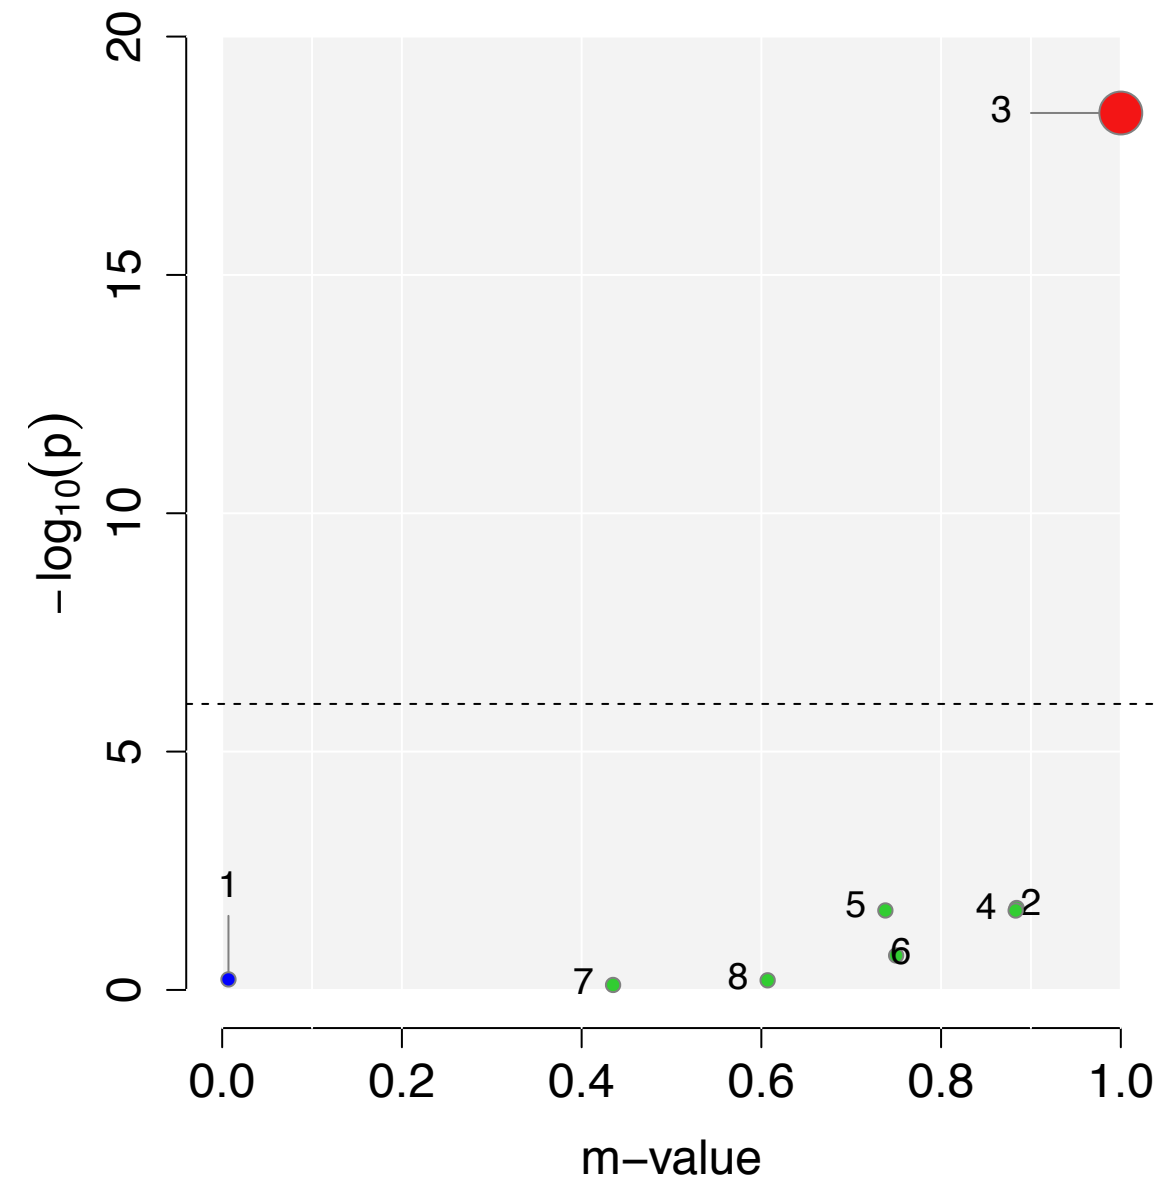

# rs27419 (Meta $P = 1.11 \times 10^{-8}$ )

Gene : *MOCS2*, *ITGA2*

## GWAS P-value

- 4.78 x 10<sup>-6</sup> ● 1.SCZ
- 0.4544 ● 2.BIP
- 0.0308 ● 3.MD
- 6.15 x 10<sup>-5</sup> ● 4.ASD
- 0.0486 ● 5.ADHD
- 0.0236 ● 6.TS
- 0.9813 ● 7.ANO
- 0.2481 ● 8.OCD

FE summary

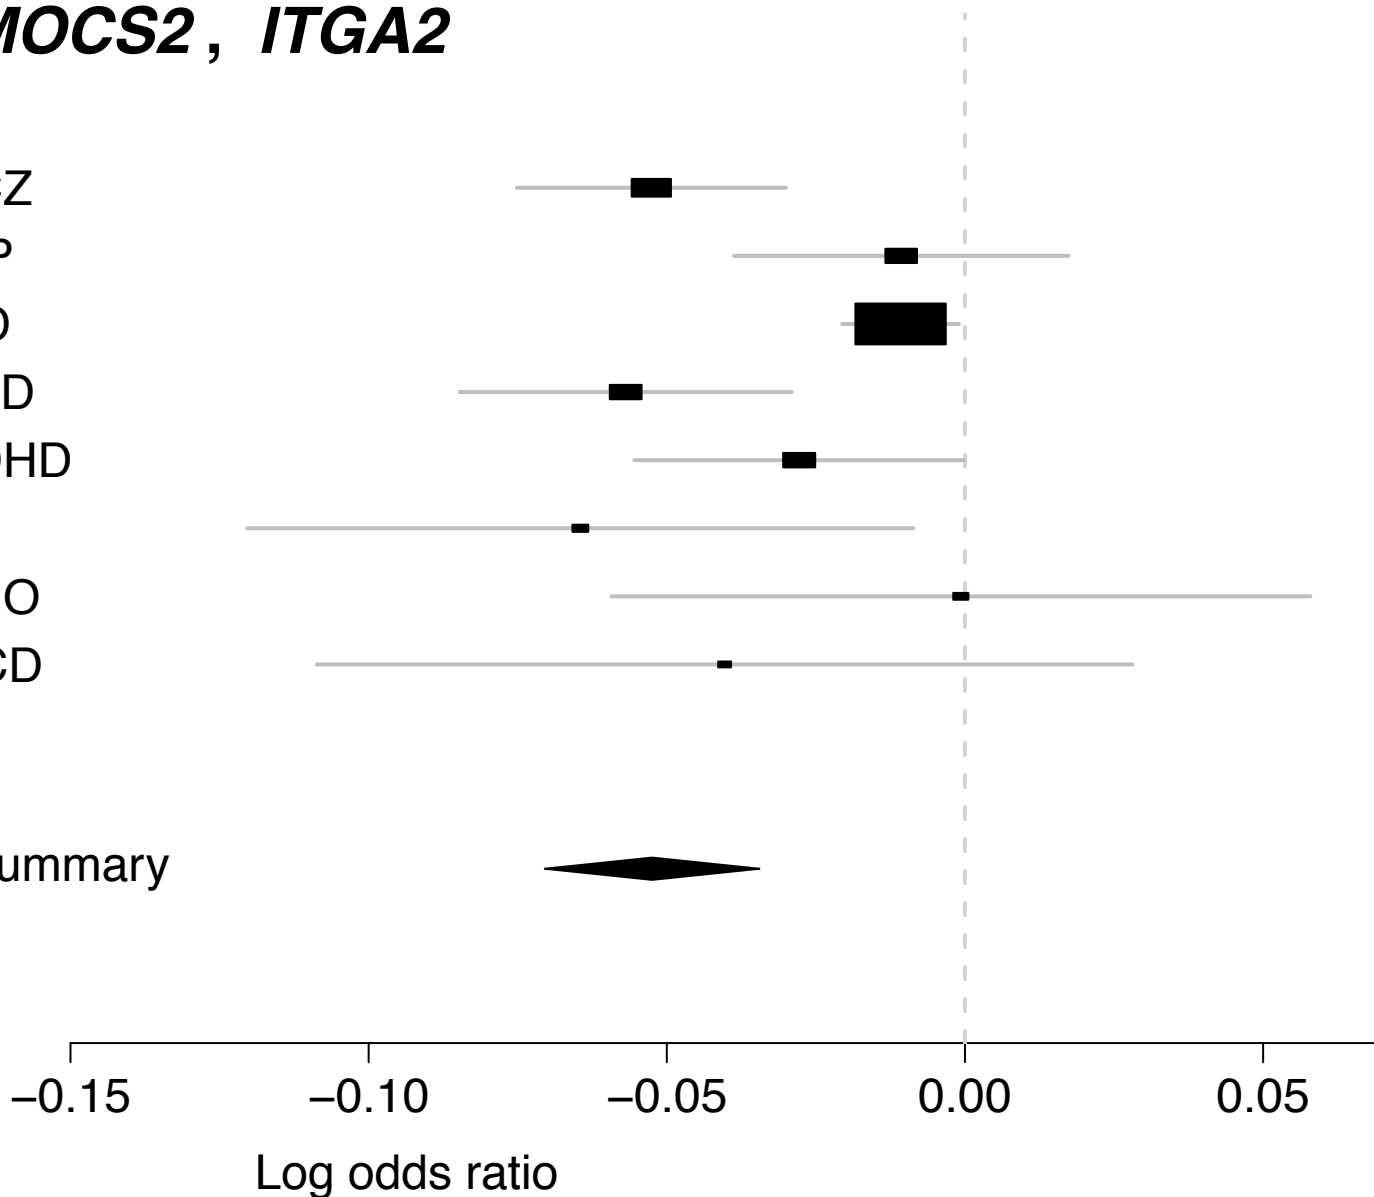

## PM-Plot

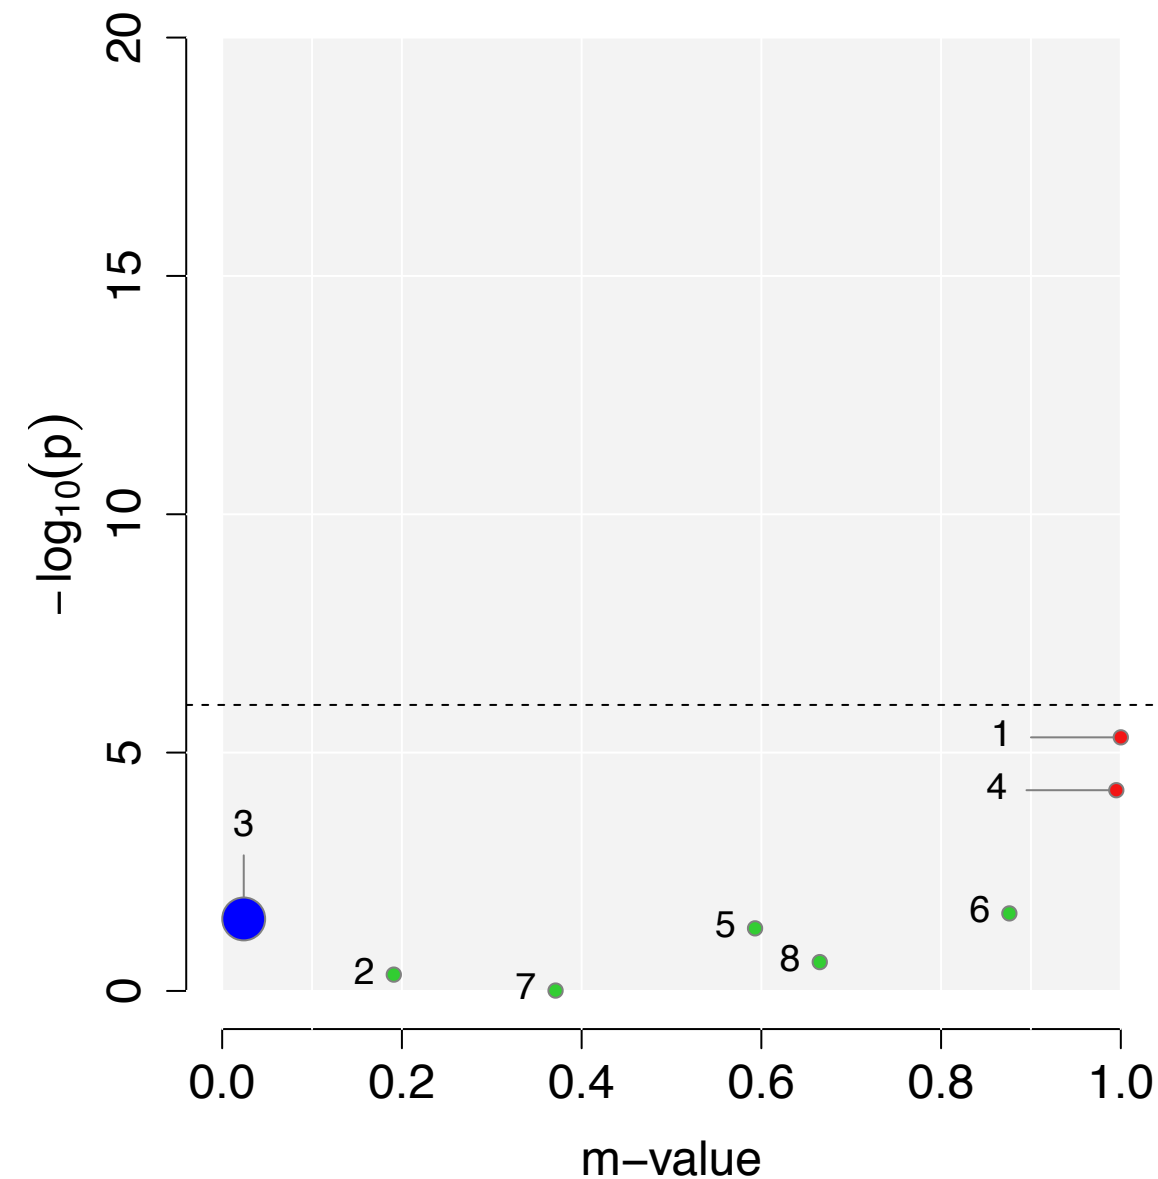

# rs174592 (Meta $P = 6.14 \times 10^{-9}$ )

Gene : *FADS2*, *FADS3*

## GWAS P-value

- 0.1767 ● 1.SCZ
- $4.03 \times 10^{-8}$  ● 2.BIP
- $5.15 \times 10^{-7}$  ● 3.MD
- 0.6023 ● 4.ASD
- 0.6852 ● 5.ADHD
- 0.4253 ● 6.TS
- 0.3221 ● 7.ANO
- 0.4378 ● 8.OCD

FE summary

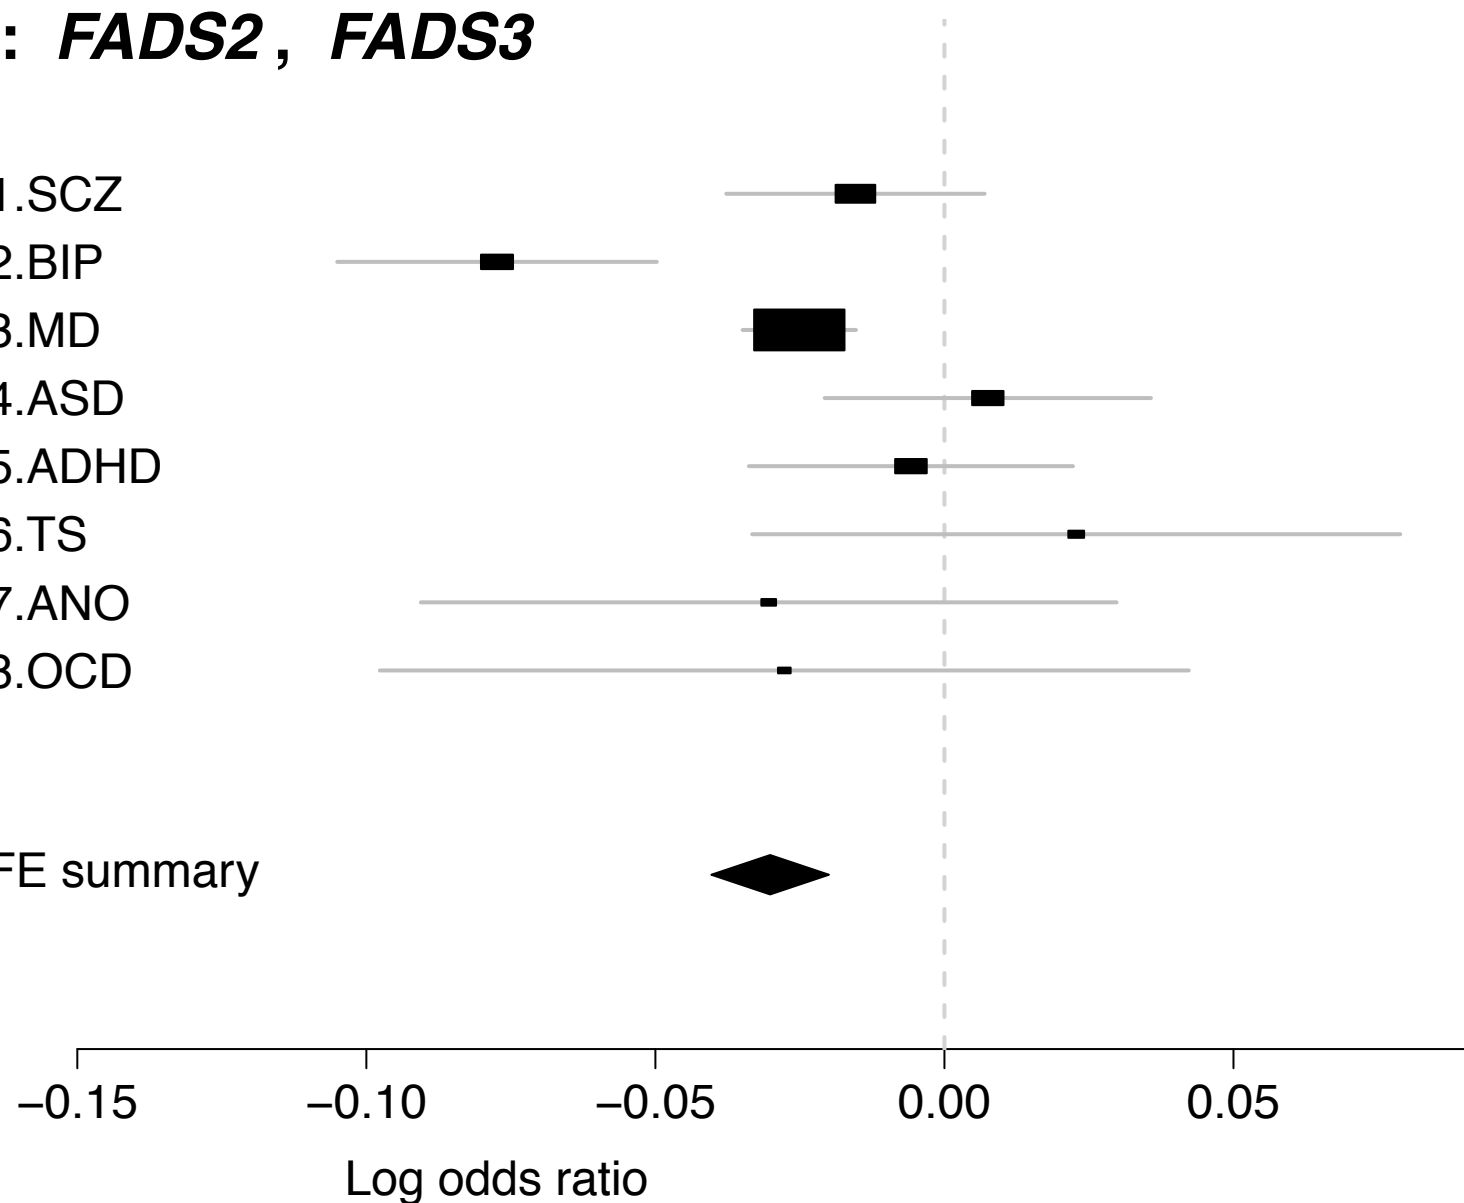

## PM-Plot

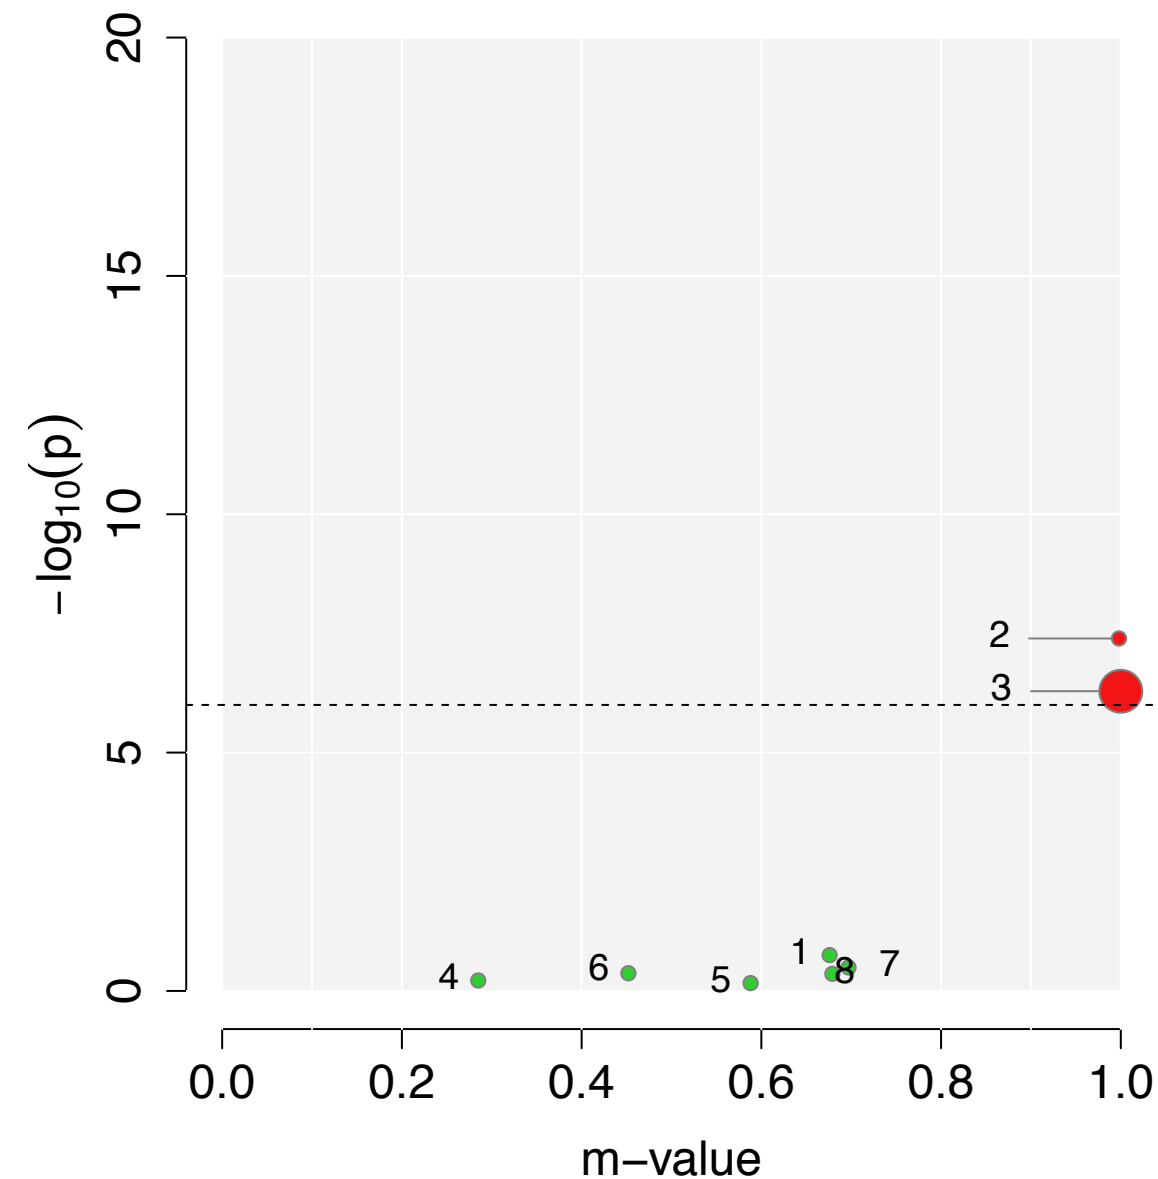

# rs247910 (Meta $P = 2.69 \times 10^{-9}$ )

Gene : *TMEM161B*

## GWAS P-value

- 0.9569 ● 1.SCZ
- 0.6117 ● 2.BIP
- $1.28 \times 10^{-10}$  ● 3.MD
- 0.0013 ● 4.ASD
- $6.34 \times 10^{-6}$  ● 5.ADHD
- 0.1899 ● 6.TS
- 0.1783 ● 7.ANO
- 0.1837 ● 8.OCD

FE summary

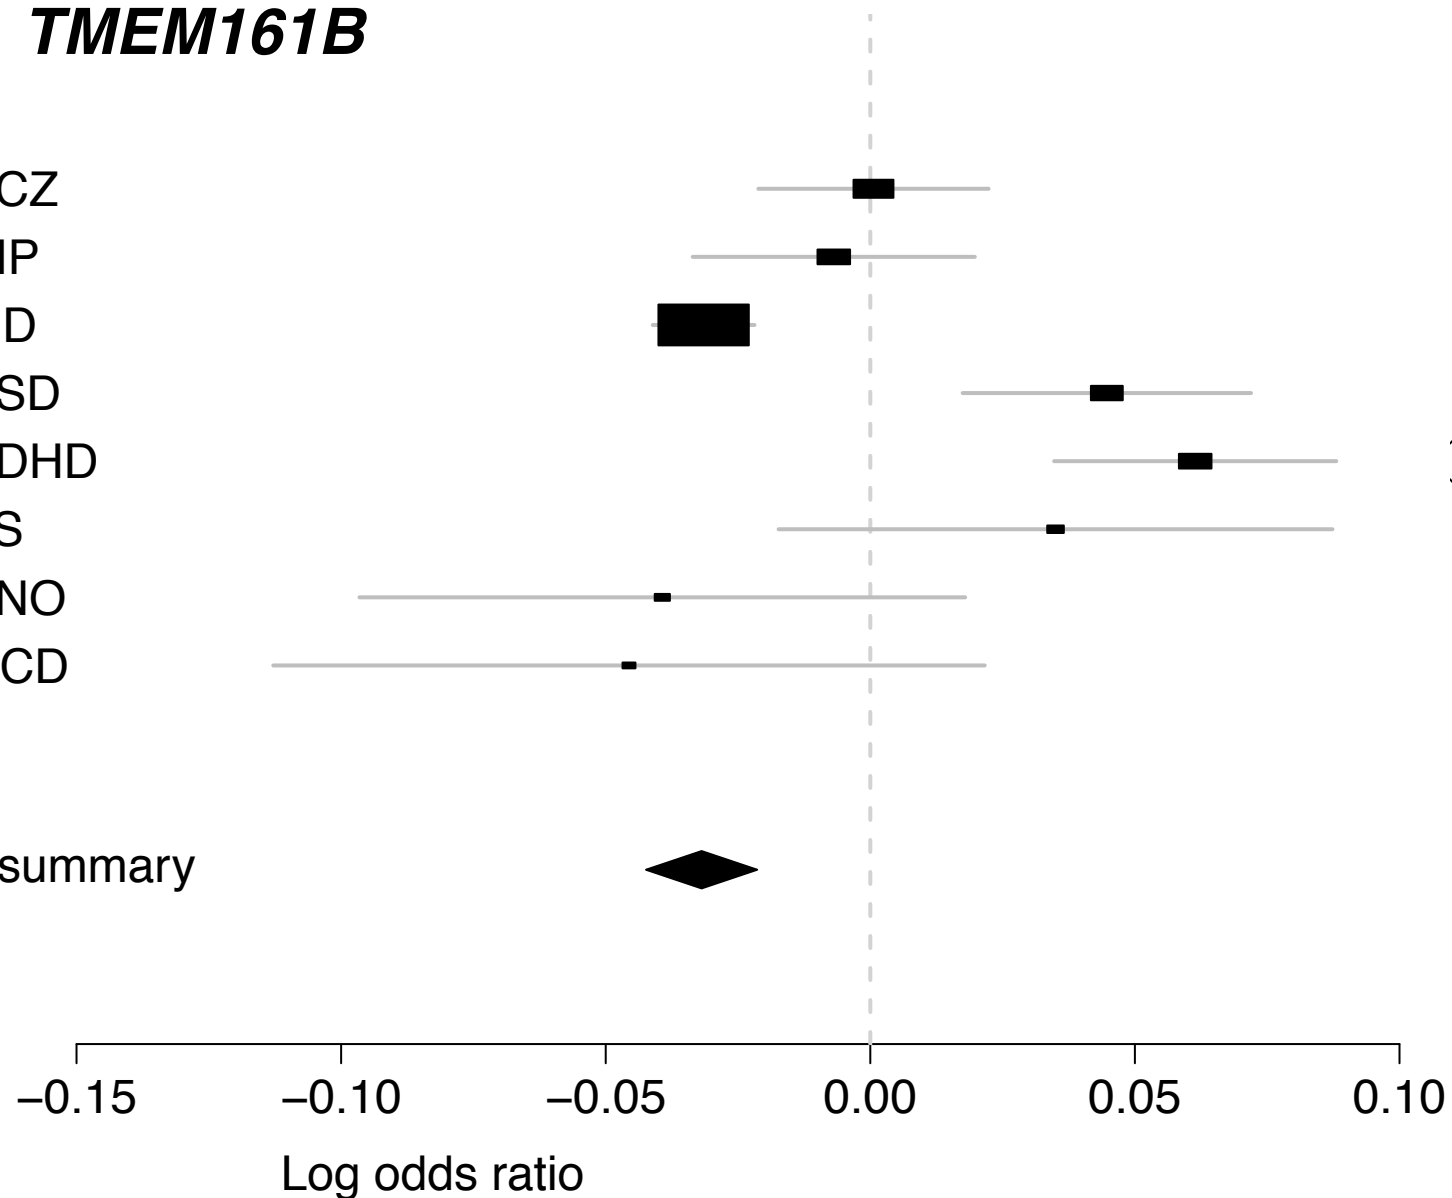

## PM-Plot

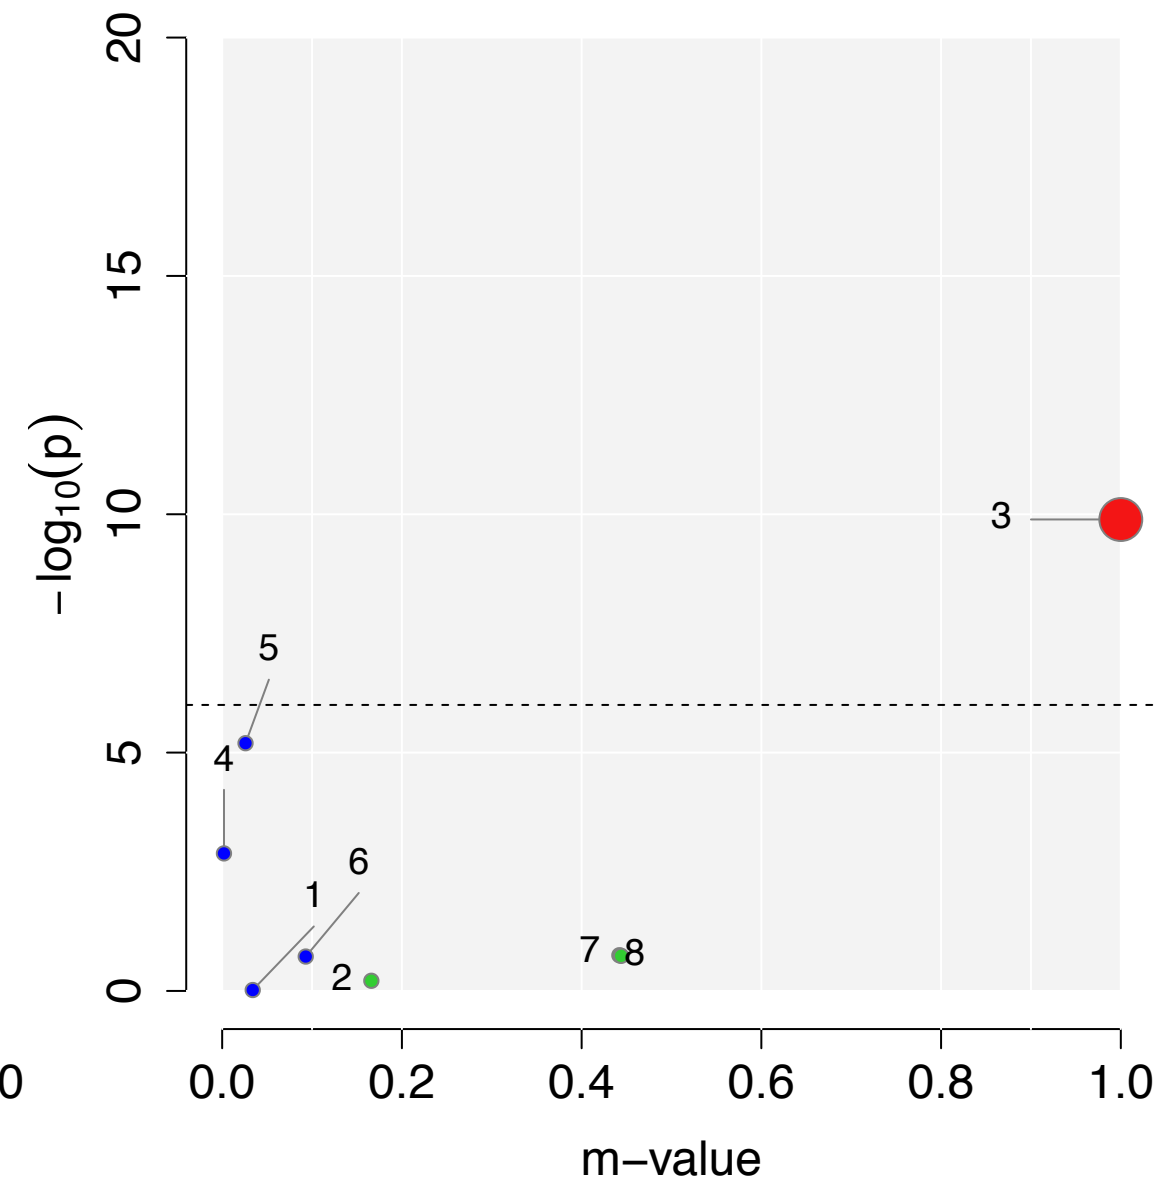

# rs301799 (Meta $P = 1.69 \times 10^{-8}$ )

Gene : *RERE*, *SLC45A1*

## GWAS P-value

- 6.91 x 10<sup>-7</sup> ● 1.SCZ
- 0.5613 ● 2.BIP
- 3.38 x 10<sup>-8</sup> ● 3.MD
- 0.1411 ● 4.ASD
- 0.1888 ● 5.ADHD
- 0.0016 ● 6.TS
- 0.1181 ● 7.ANO
- 0.0233 ● 8.OCD

FE summary

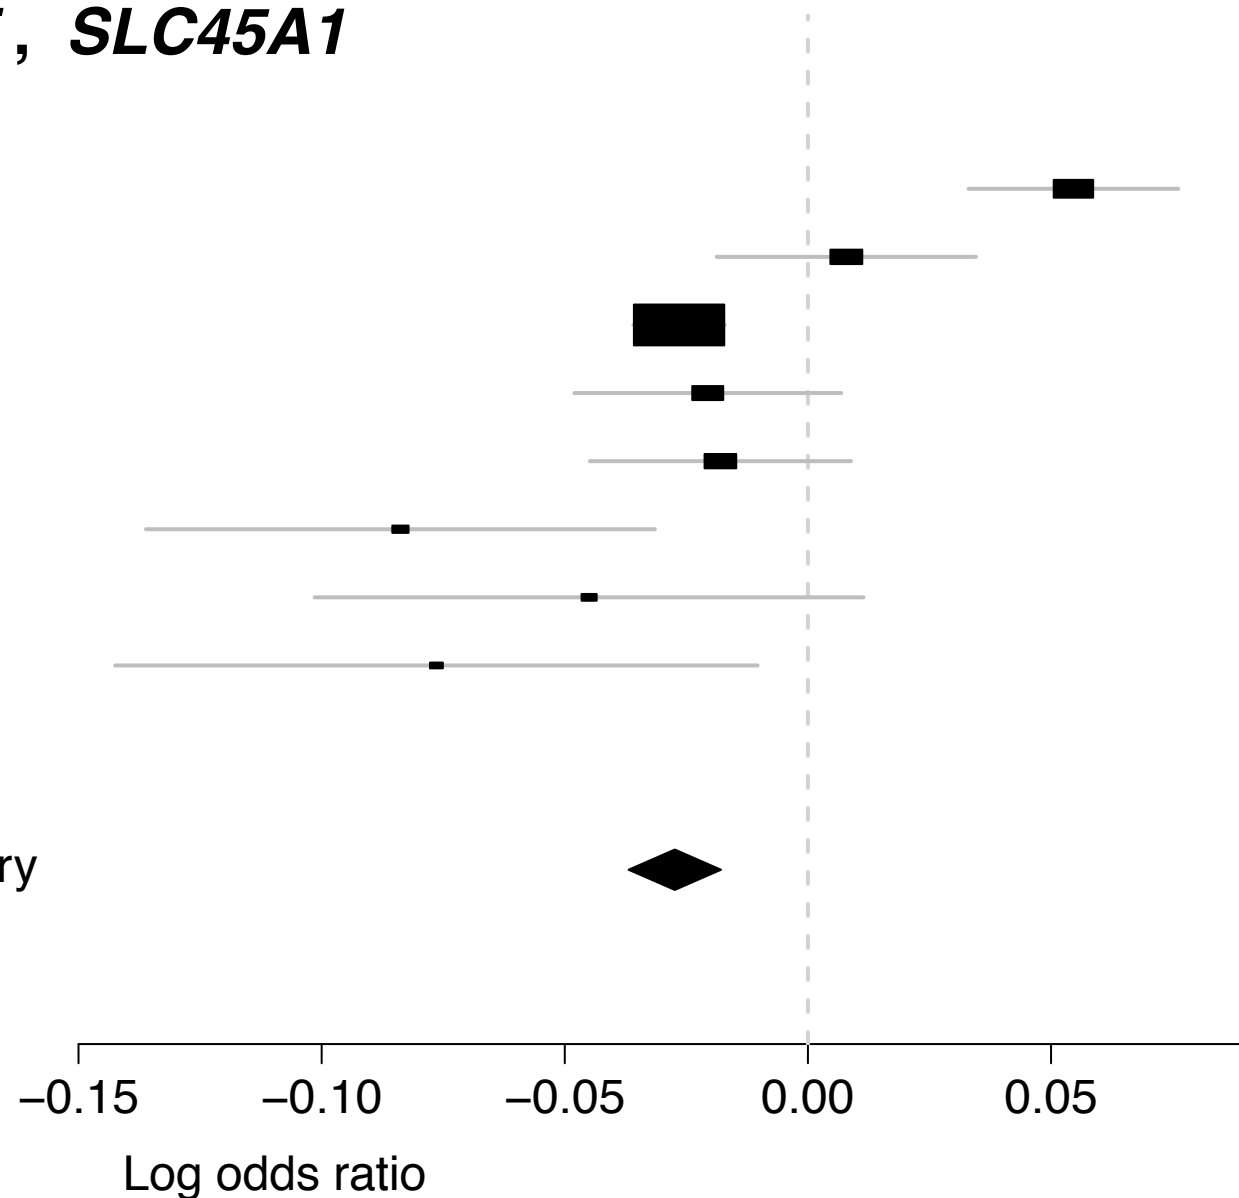

## PM-Plot

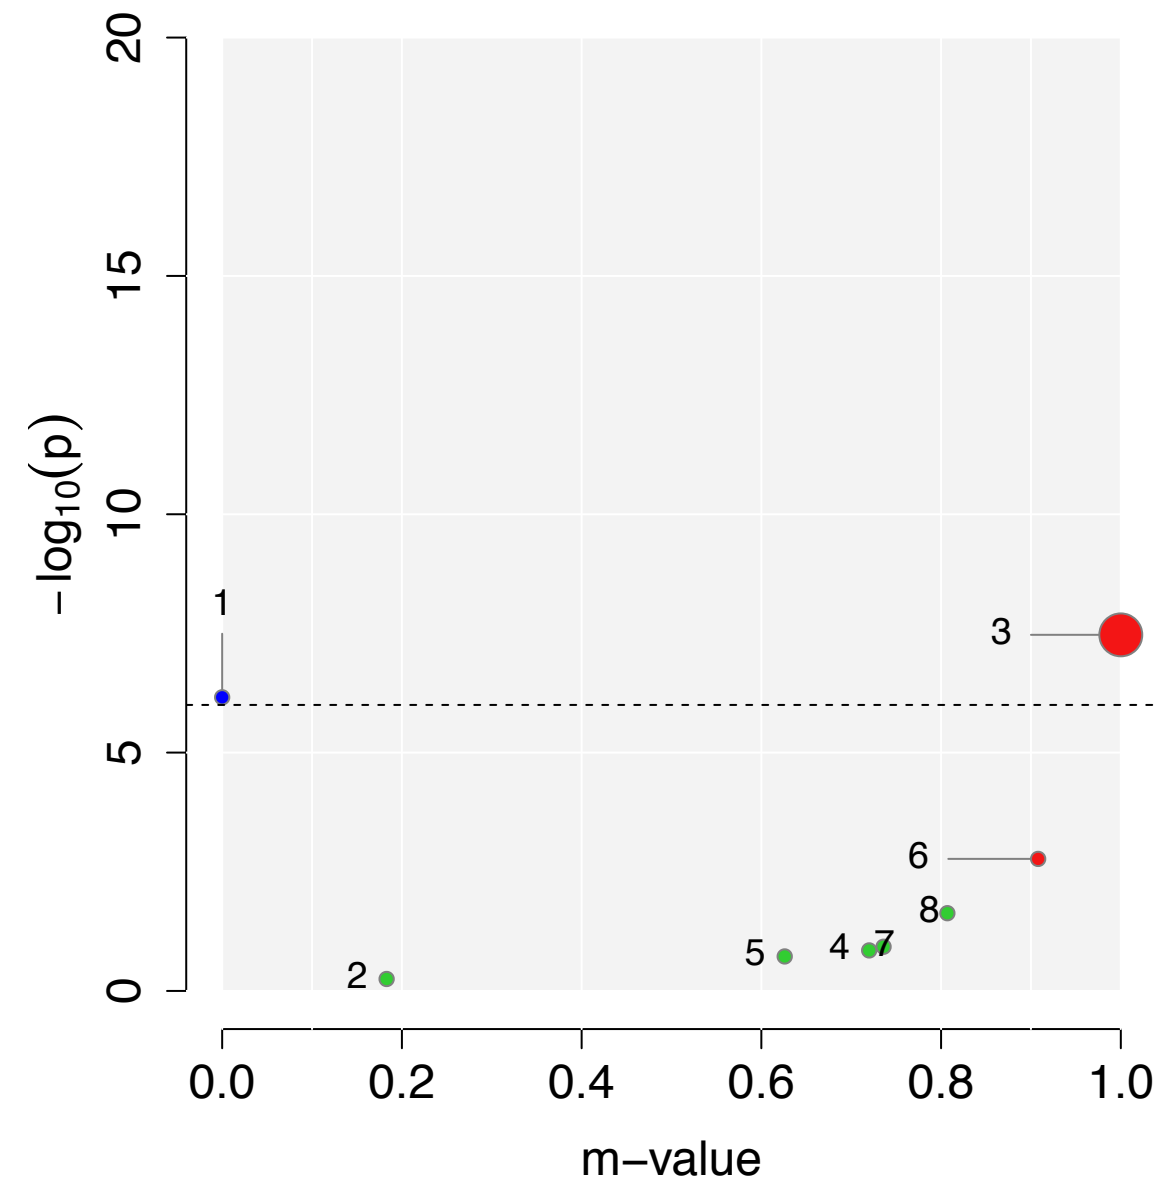

# rs395138 (Meta $P = 1.03 \times 10^{-8}$ )

Gene : *ENOX1*

## GWAS P-value

- 0.0005 ● 1.SCZ
- 0.1196 ● 2.BIP
- $4.70 \times 10^{-8}$  ● 3.MD
- 0.9349 ● 4.ASD
- 0.0946 ● 5.ADHD
- 0.2091 ● 6.TS
- 0.2456 ● 7.ANO
- 0.2081 ● 8.OCD

FE summary

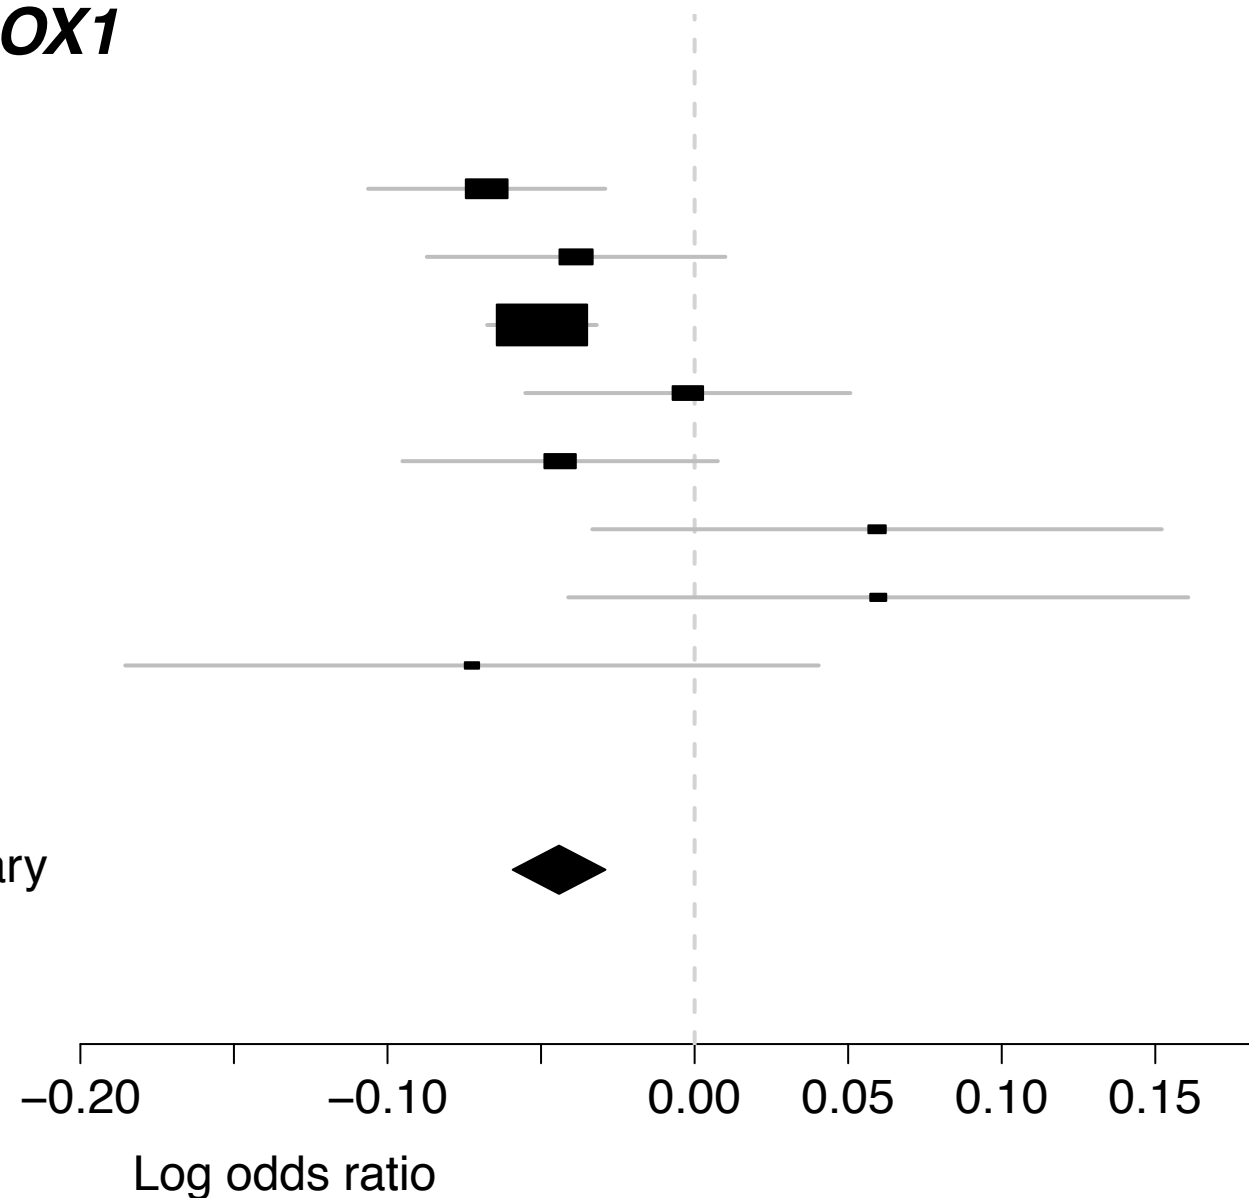

## PM-Plot

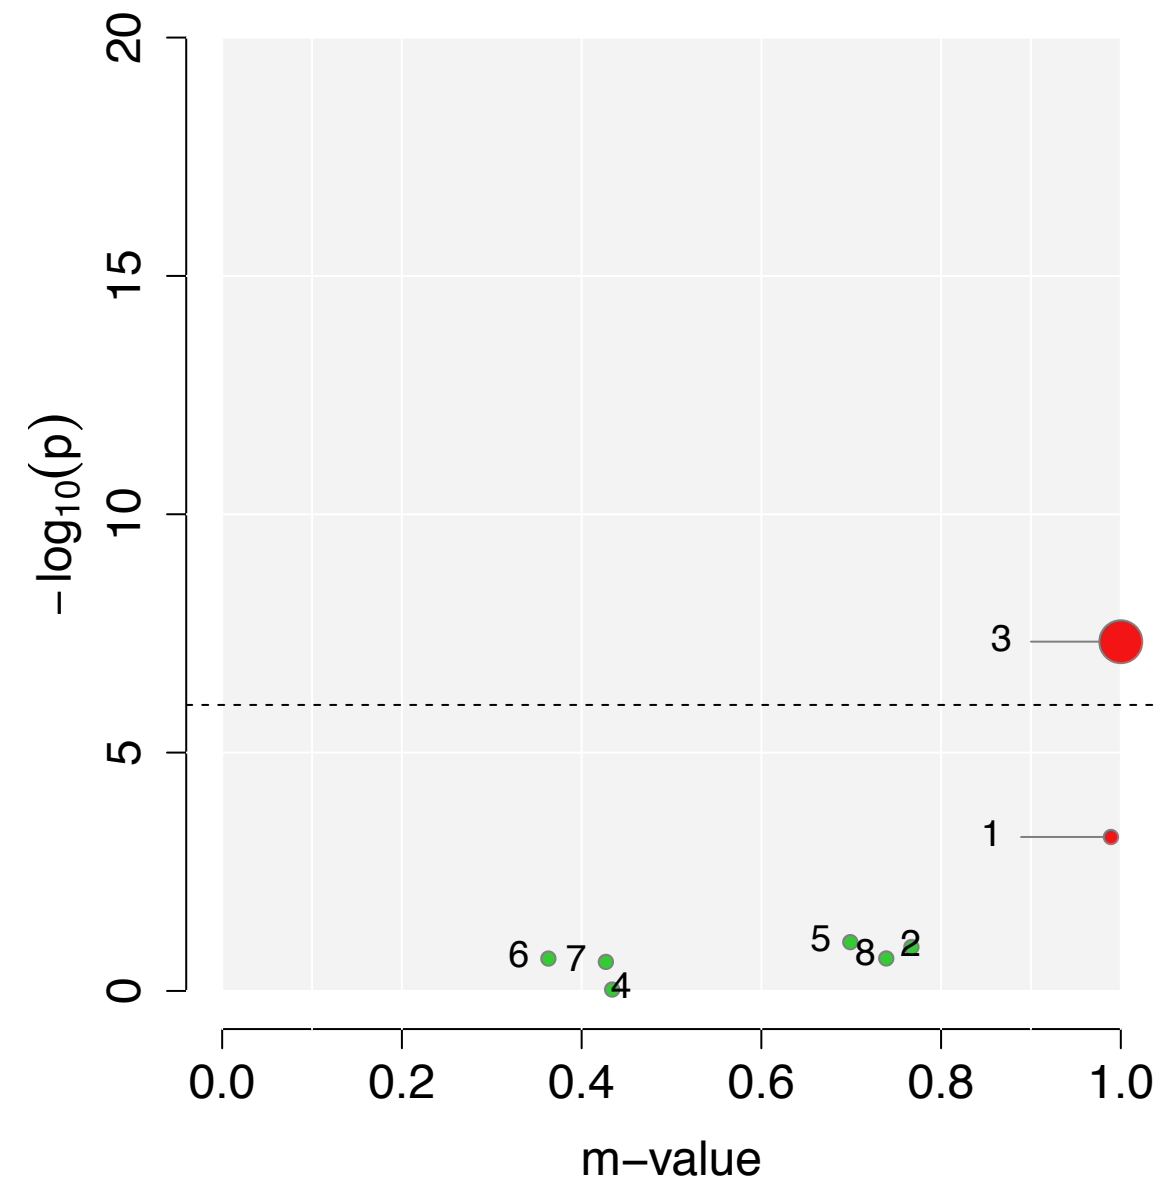



# rs631399 (Meta $P = 6.6e \times 10^{-11}$ )

Gene : (>200kb)

## GWAS P-value

- 0.3915 ● 1.SCZ
- 0.7224 ● 2.BIP
- $5.21 \times 10^{-12}$  ● 3.MD
- 0.4672 ● 4.ASD
- 0.0656 ● 5.ADHD
- 0.2382 ● 6.TS
- 0.1053 ● 7.ANO
- 0.1307 ● 8.OCD

FE summary

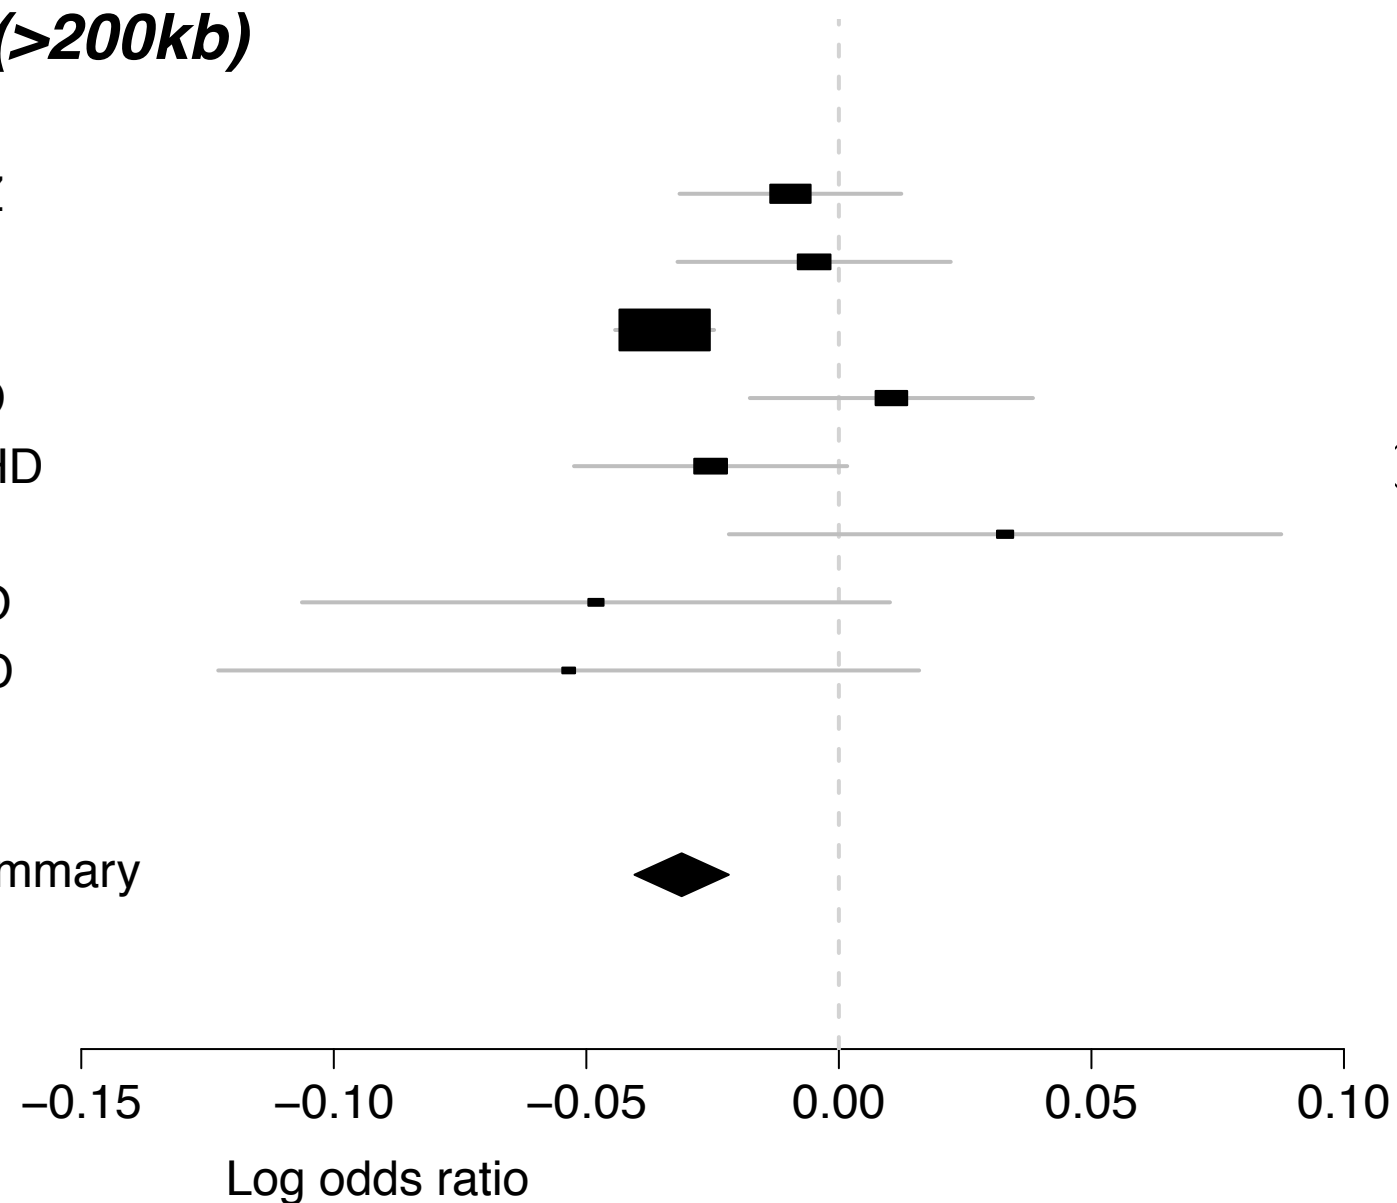

## PM-Plot

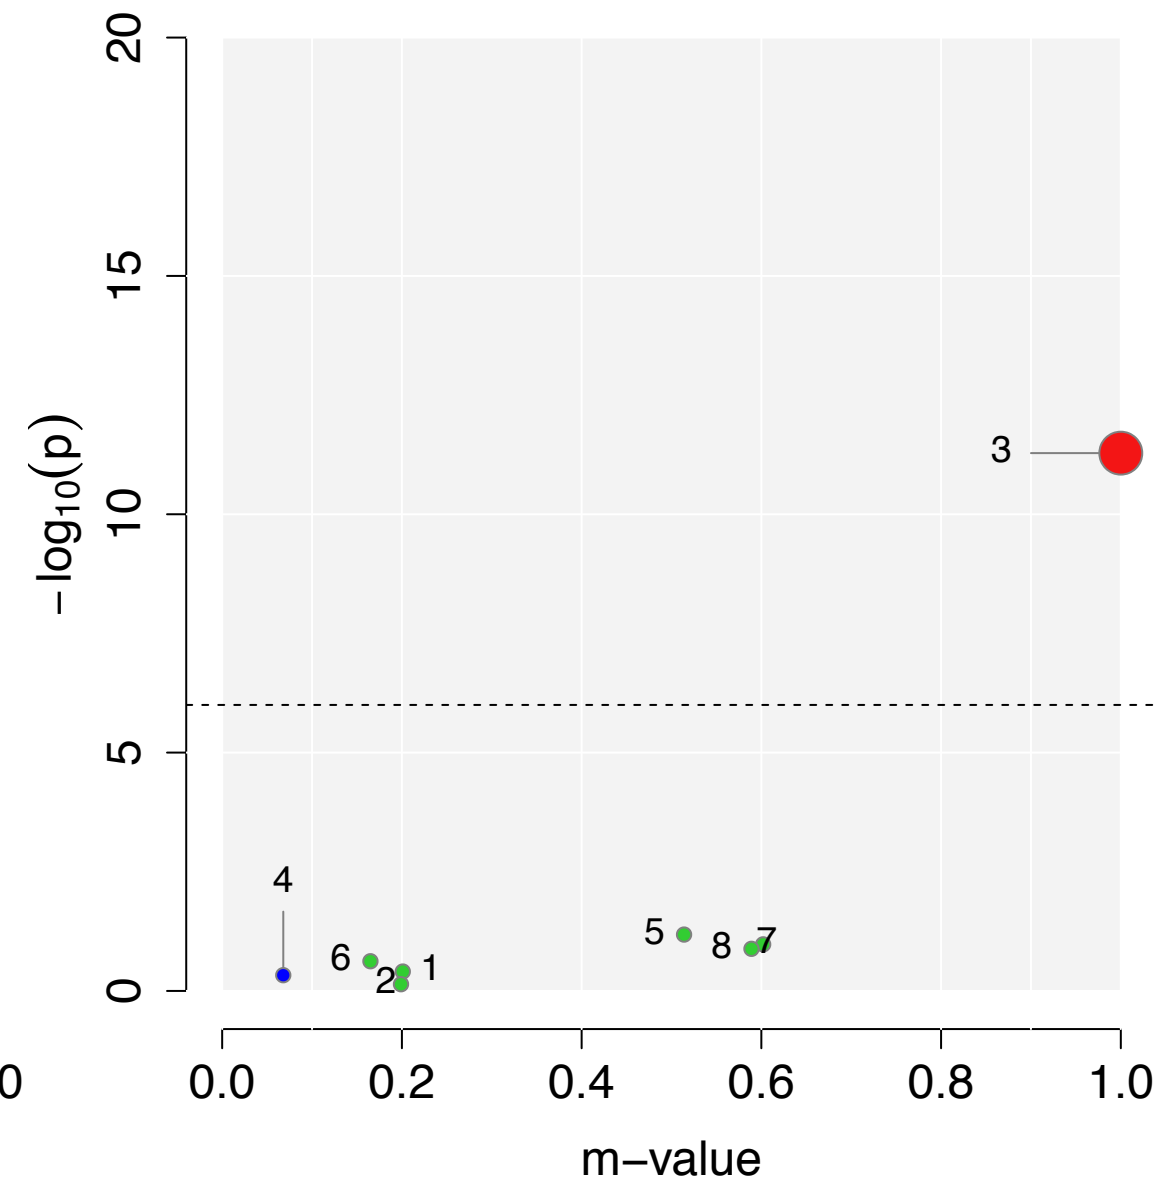

rs732381 (Meta  $P = 6.87 \times 10^{-11}$ )

Gene : *CACNA1I*, *ENTHD1*

GWAS P-value

- 2.11 x 10<sup>-10</sup> ● 1.SCZ
- 1.87 x 10<sup>-5</sup> ● 2.BIP
- 0.0026 ● 3.MD
- 0.7357 ● 4.ASD
- 0.9892 ● 5.ADHD
- 0.3788 ● 6.TS
- 0.6395 ● 7.ANO
- 0.1040 ● 8.OCD

FE summary

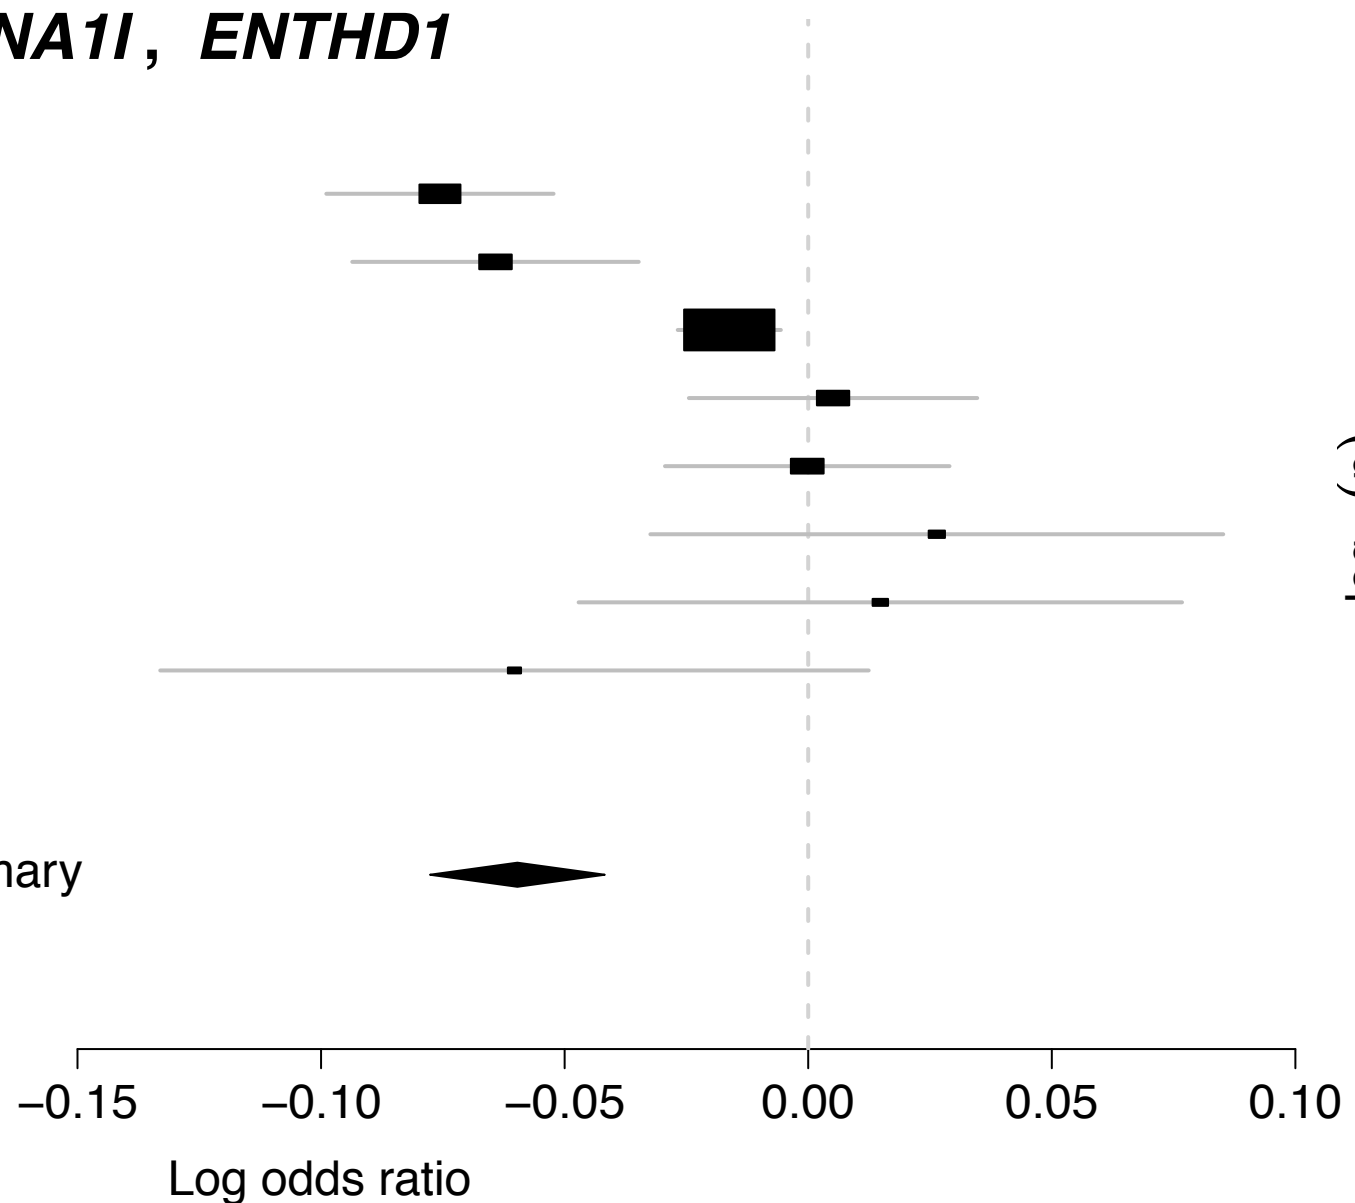

PM-Plot

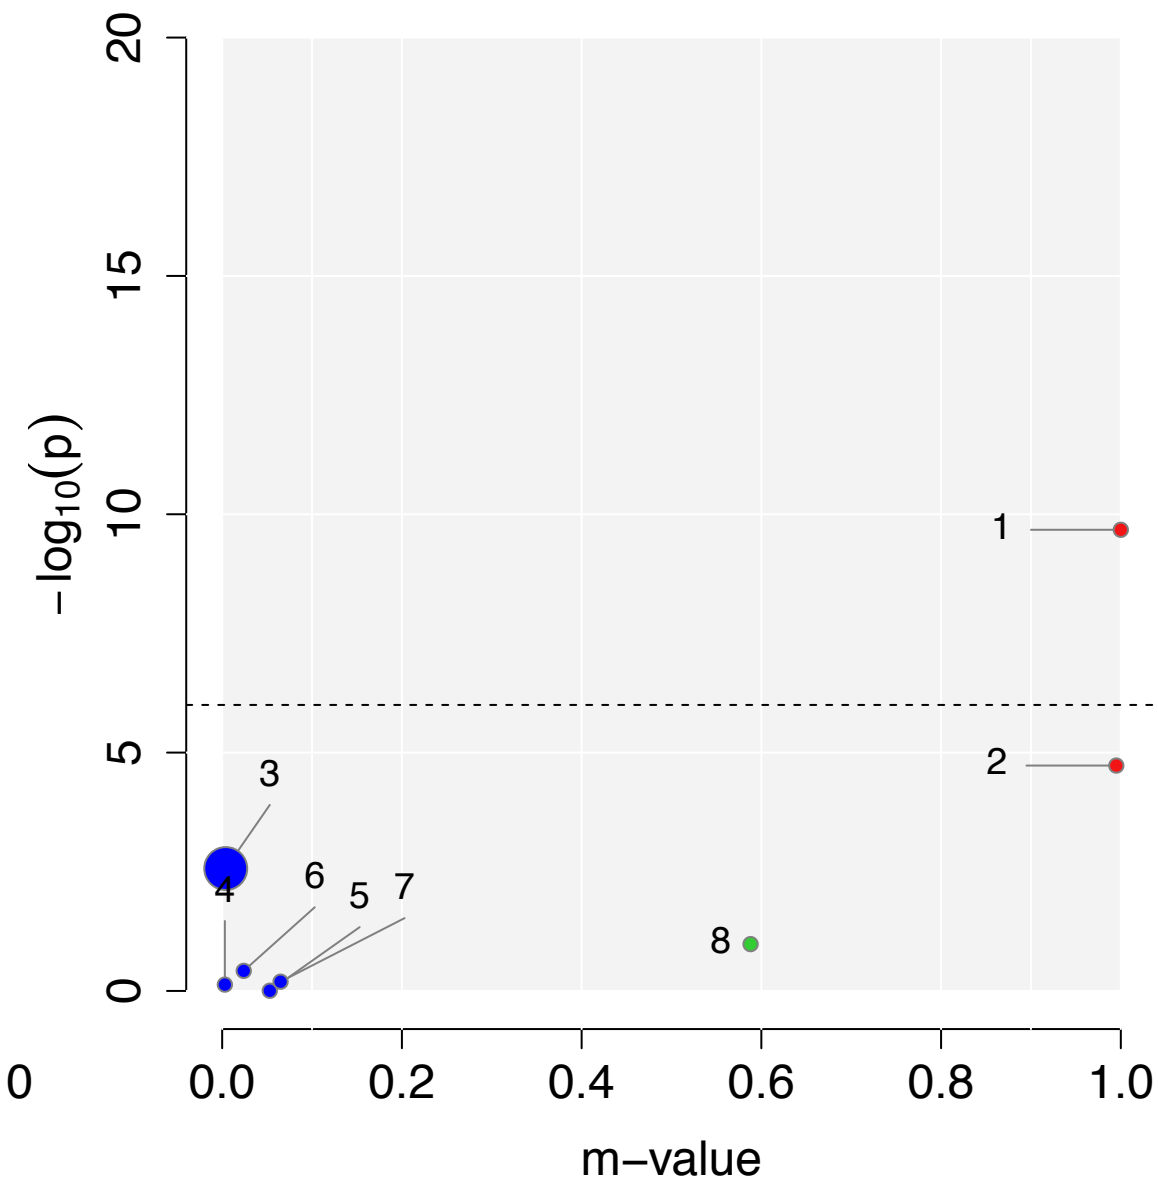

# rs746839 (Meta $P = 2.94 \times 10^{-8}$ )

Gene : *MROH5*

## GWAS P-value

- $3.46 \times 10^{-5}$  ● 1.SCZ
- 0.9886 ● 2.BIP
- 0.0843 ● 3.MD
- $4.36 \times 10^{-6}$  ● 4.ASD
- 0.9340 ● 5.ADHD
- 0.2594 ● 6.TS
- 0.0818 ● 7.ANO
- 0.3752 ● 8.OCD

FE summary

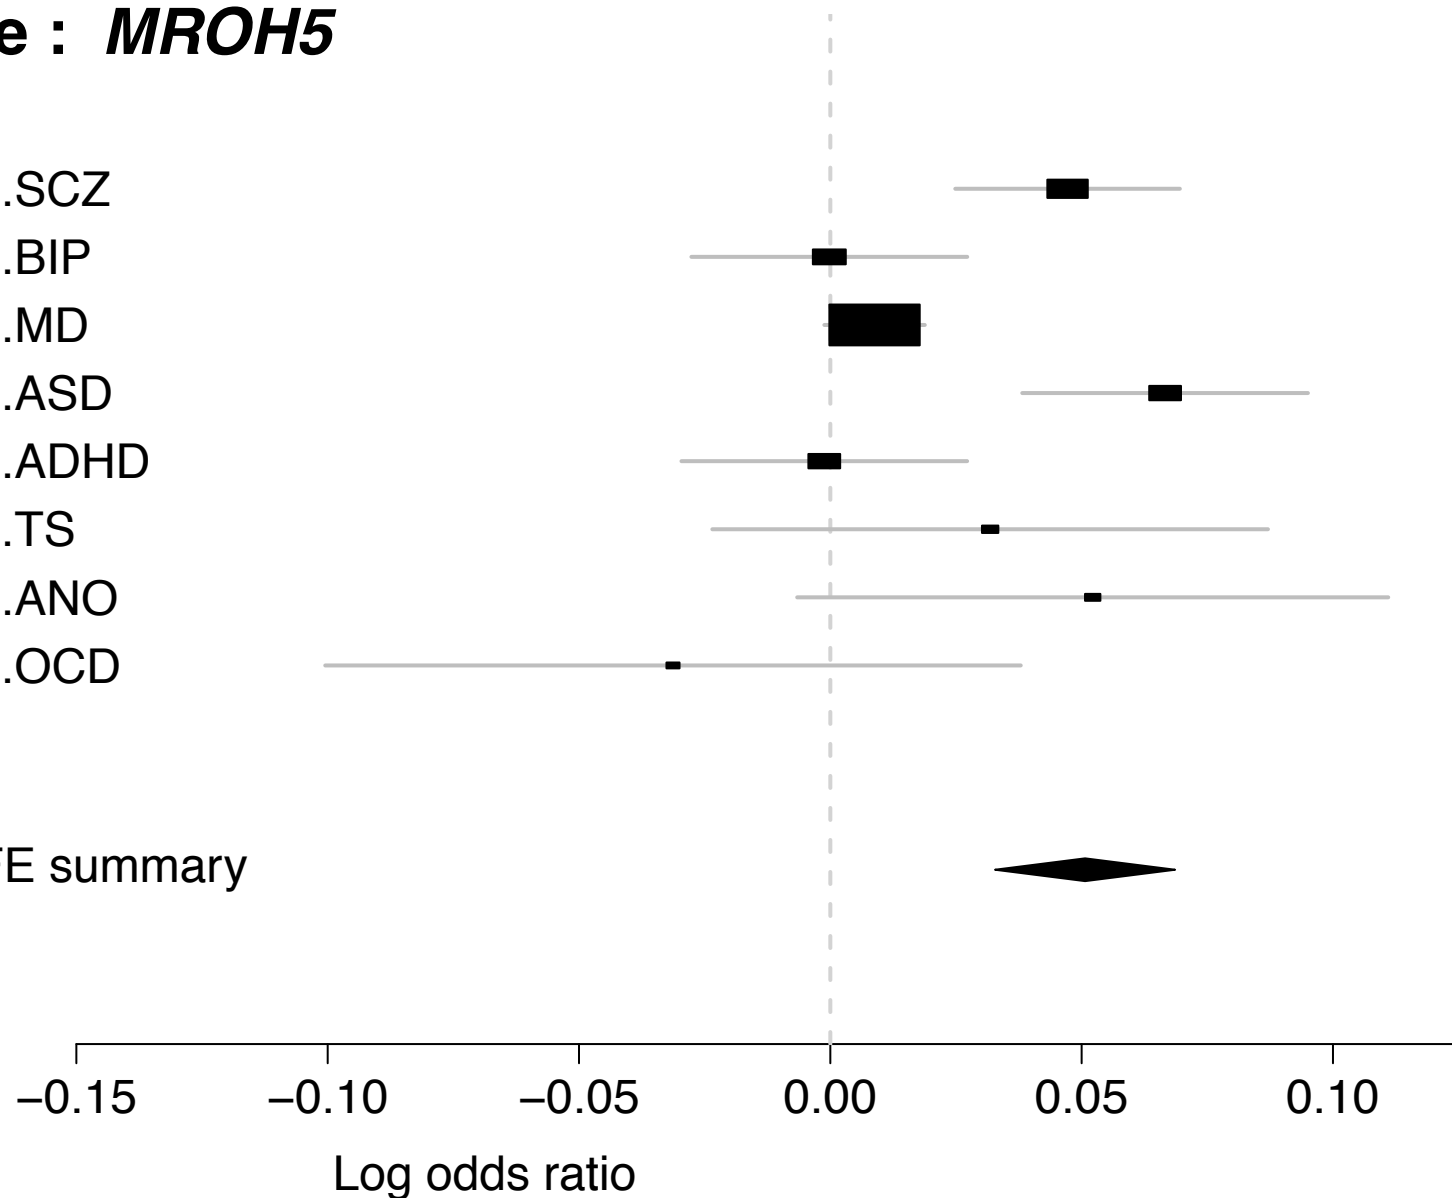

## PM-Plot

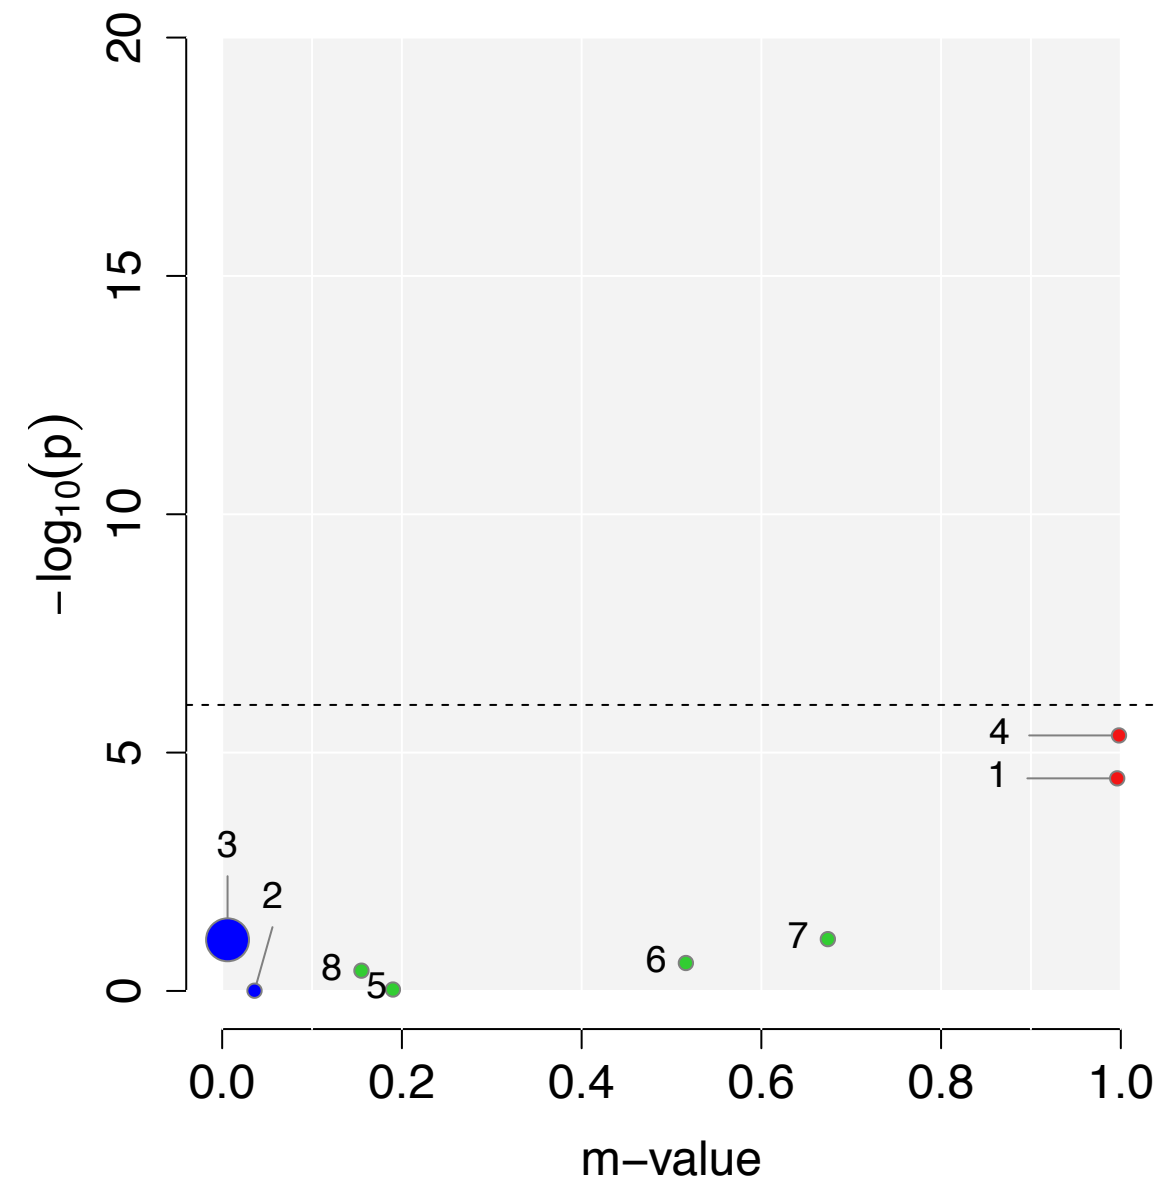

rs760648 (Meta  $P = 1.08 \times 10^{-8}$ )

Gene : *TCF20*, *CYP2D6*

GWAS P-value

- 1.32 x 10<sup>-10</sup> ● 1.SCZ
- 0.0058 ● 2.BIP
- 0.0020 ● 3.MD
- 0.0418 ● 4.ASD
- 0.4099 ● 5.ADHD
- 0.3636 ● 6.TS
- 0.1483 ● 7.ANO
- 0.5519 ● 8.OCD

FE summary

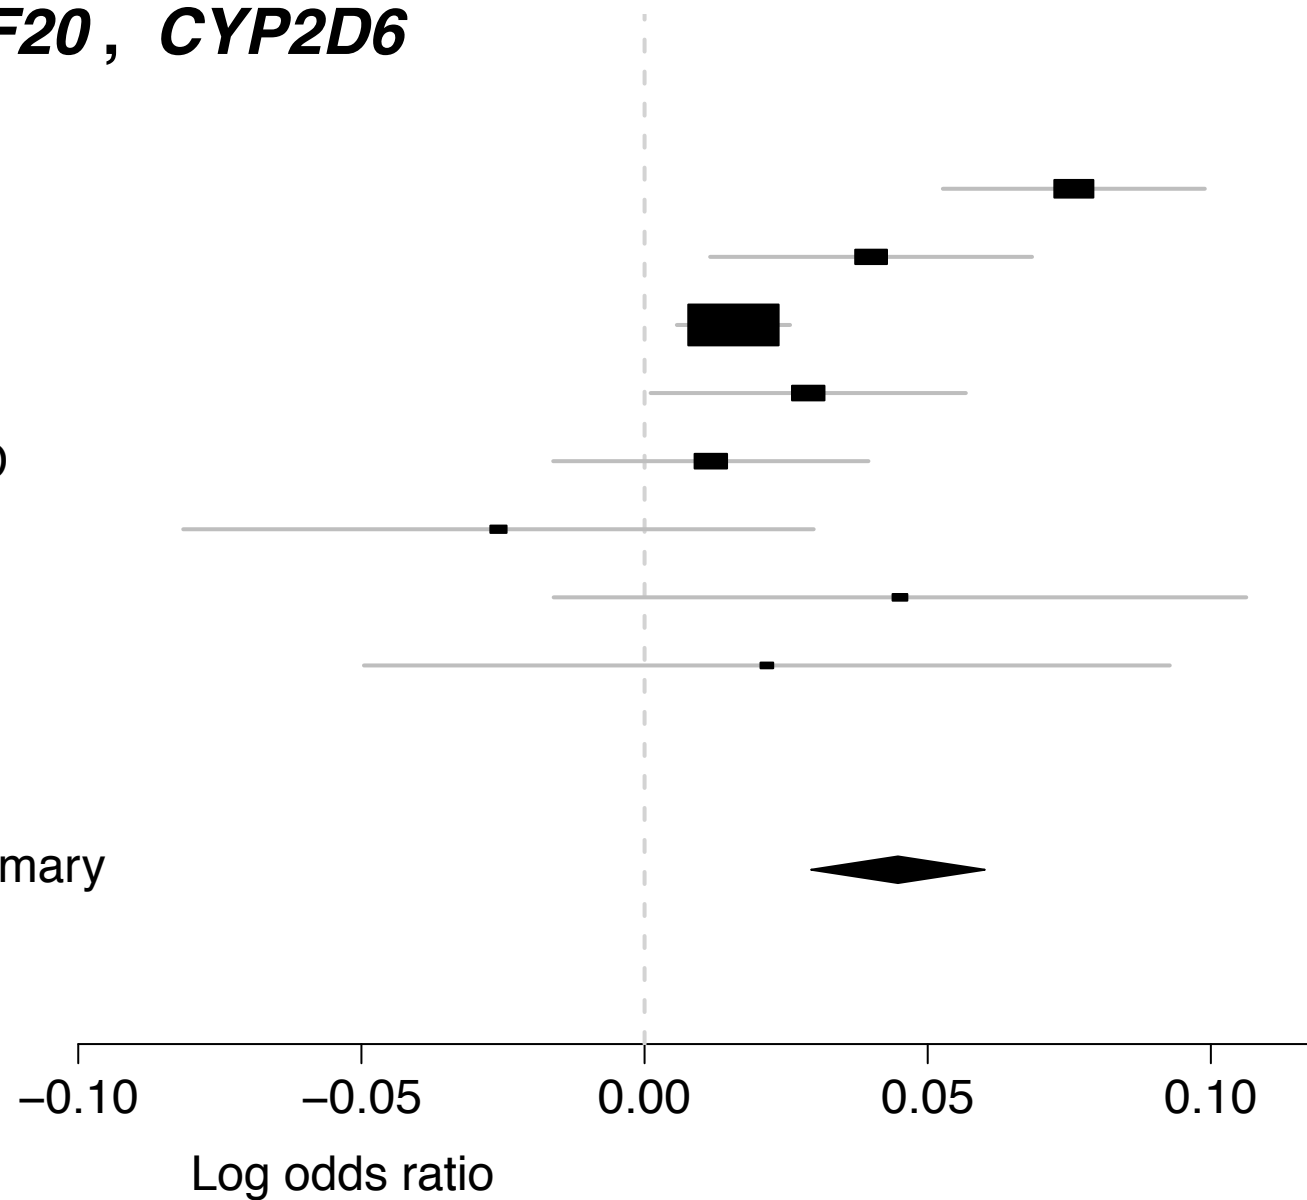

PM-Plot

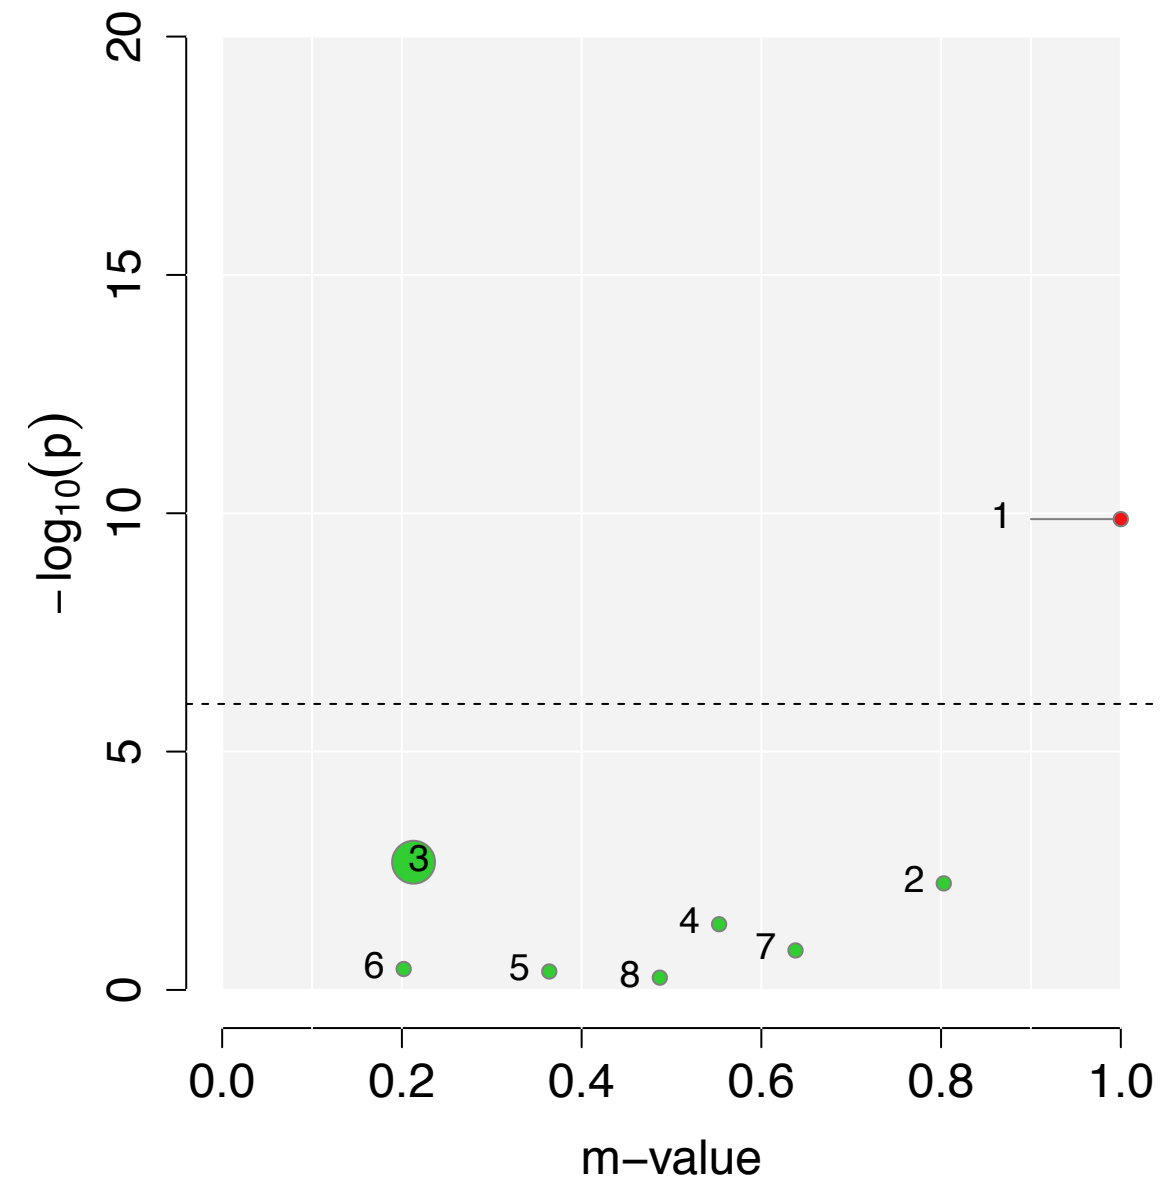

rs778353 (Meta  $P = 2.06 \times 10^{-11}$ )

Gene : *NGEF*, *C2orf82*

GWAS P-value

- 1.60 x 10<sup>0</sup> ● 1.SCZ
- 1.69 x 10<sup>-5</sup> ● 2.BIP
- 0.2353 ● 3.MD
- 0.1101 ● 4.ASD
- 0.2931 ● 5.ADHD
- 0.0025 ● 6.TS
- 0.0124 ● 7.ANO
- 0.9953 ● 8.OCD

FE summary

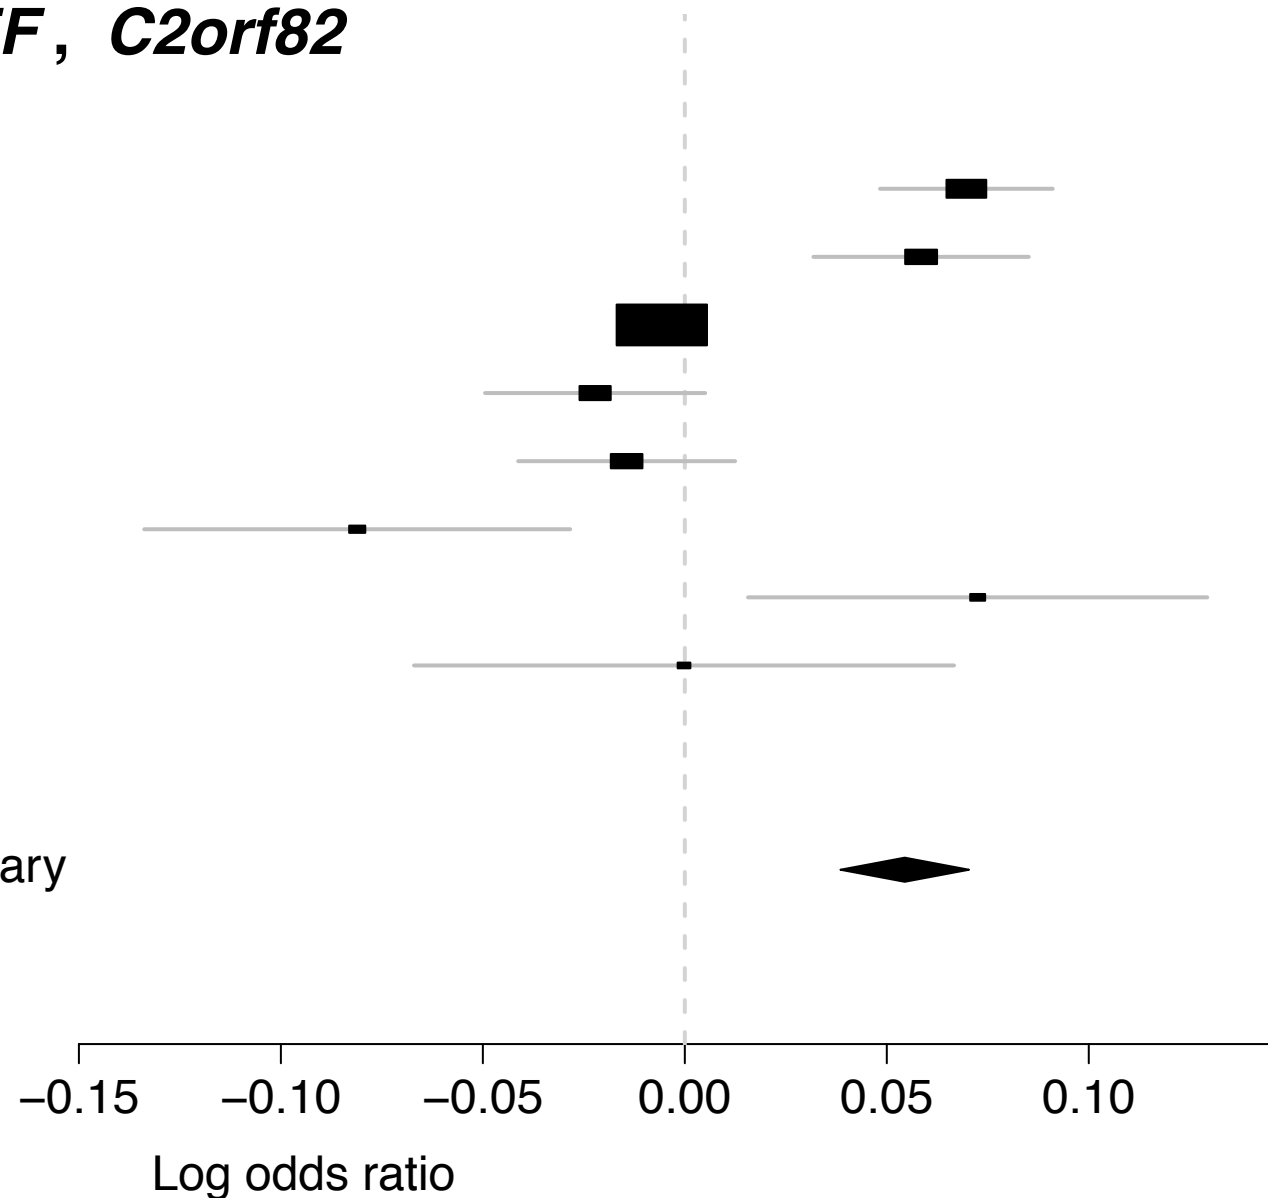

PM-Plot

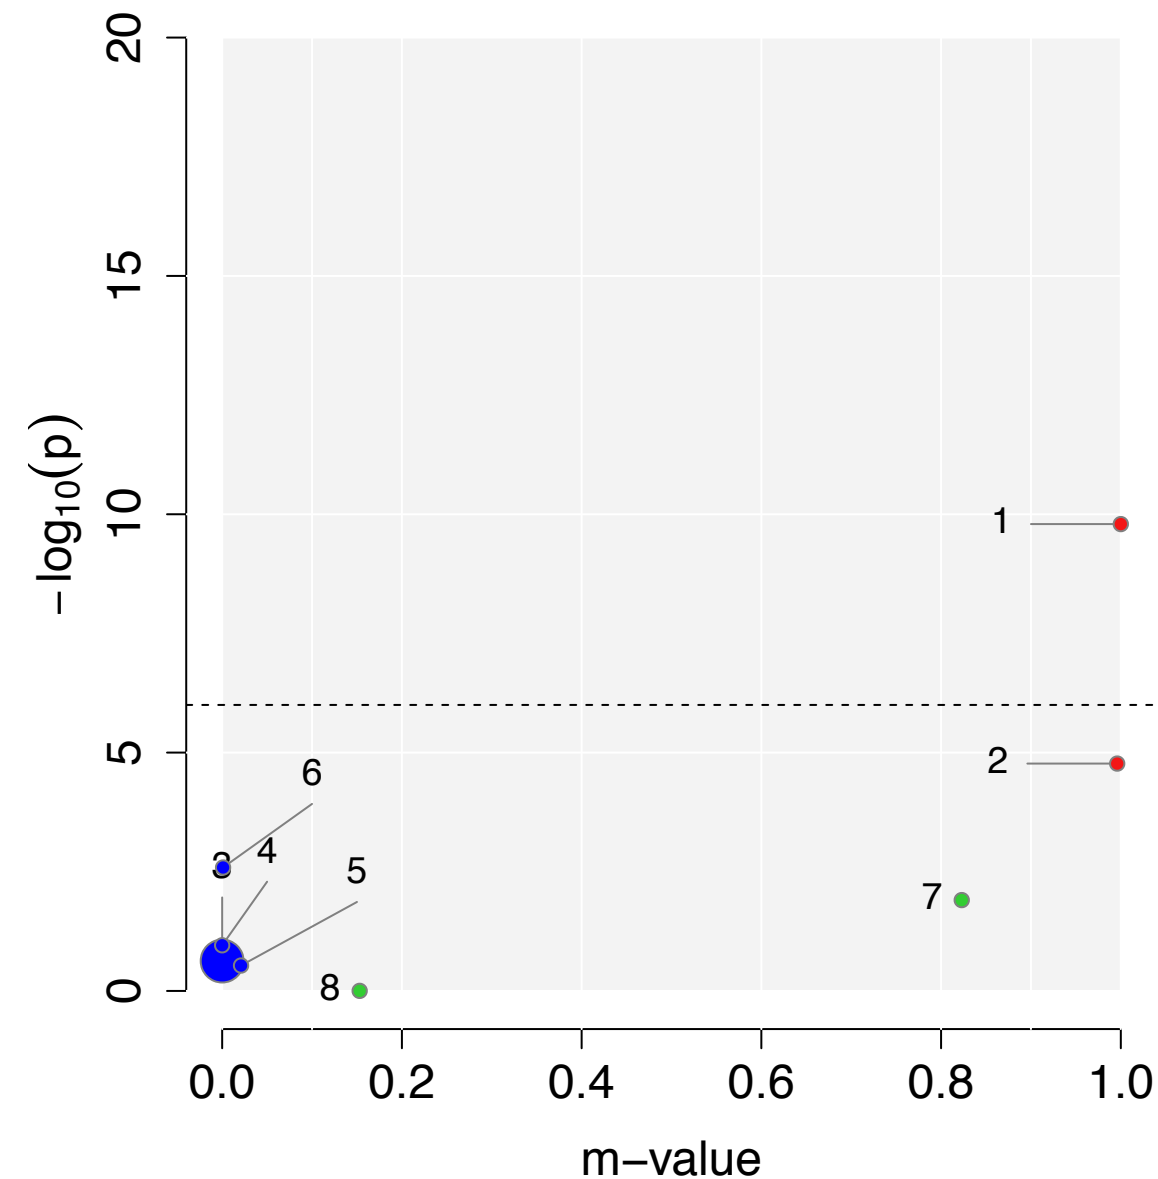

rs832190 (Meta  $P = 3.6e \times 10^{-9}$ )

Gene : *THOC7*, *ATXN7*

GWAS P-value

- 6.18 x 10<sup>-10</sup> ● 1.SCZ
- 0.0055 ● 2.BIP
- 0.4596 ● 3.MD
- 0.0696 ● 4.ASD
- 0.3673 ● 5.ADHD
- 0.9885 ● 6.TS
- 0.2214 ● 7.ANO
- 0.0110 ● 8.OCD

FE summary

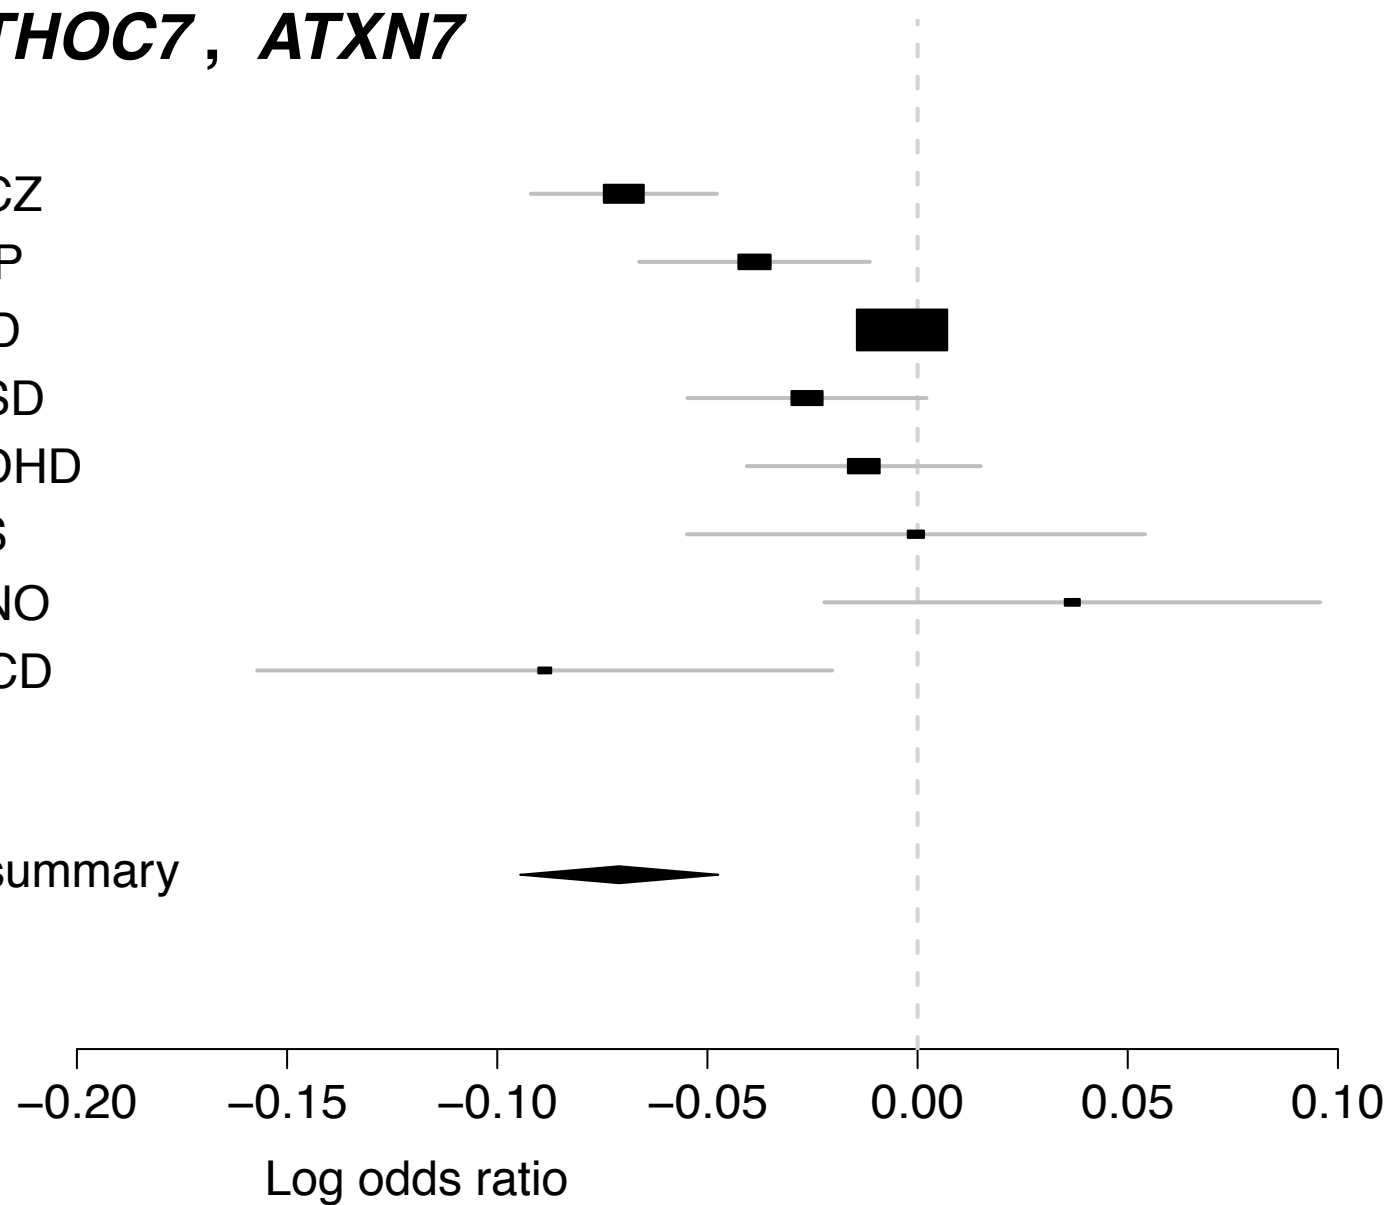

PM-Plot

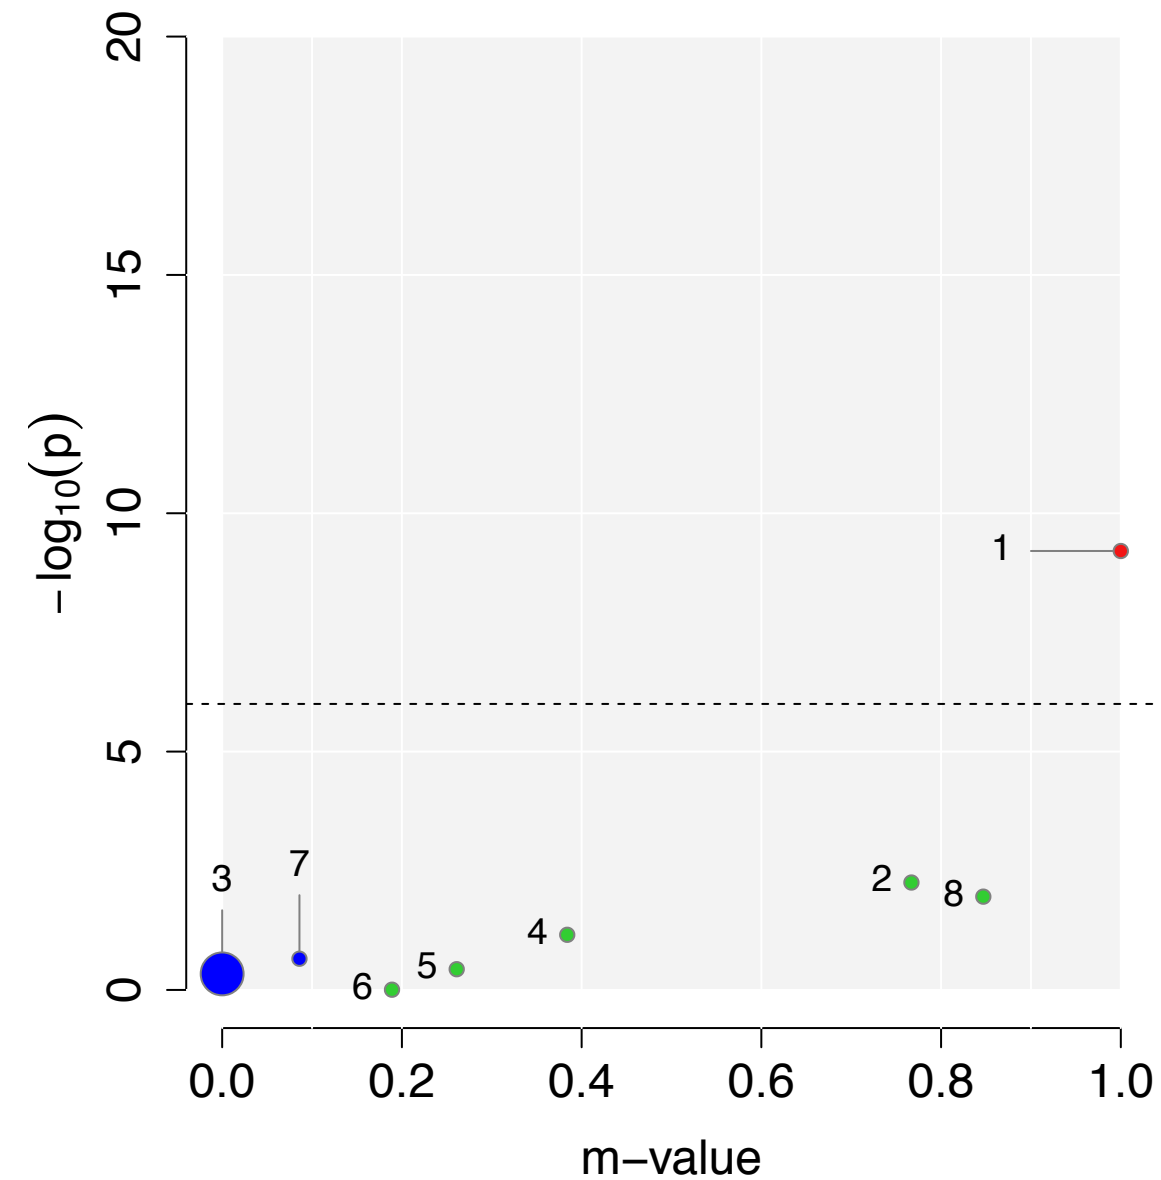

# rs880090 (Meta $P = 1.15 \times 10^{-9}$ )

Gene : *GMIP*, *LPAR2*

## GWAS P-value

- 9.90 x 10<sup>-7</sup> ● 1.SCZ
- 2.05 x 10<sup>-6</sup> ● 2.BIP
- 0.3177 ● 3.MD
- 0.0078 ● 4.ASD
- 0.4825 ● 5.ADHD
- 0.2028 ● 6.TS
- 0.2688 ● 7.ANO
- 0.1456 ● 8.OCD

FE summary

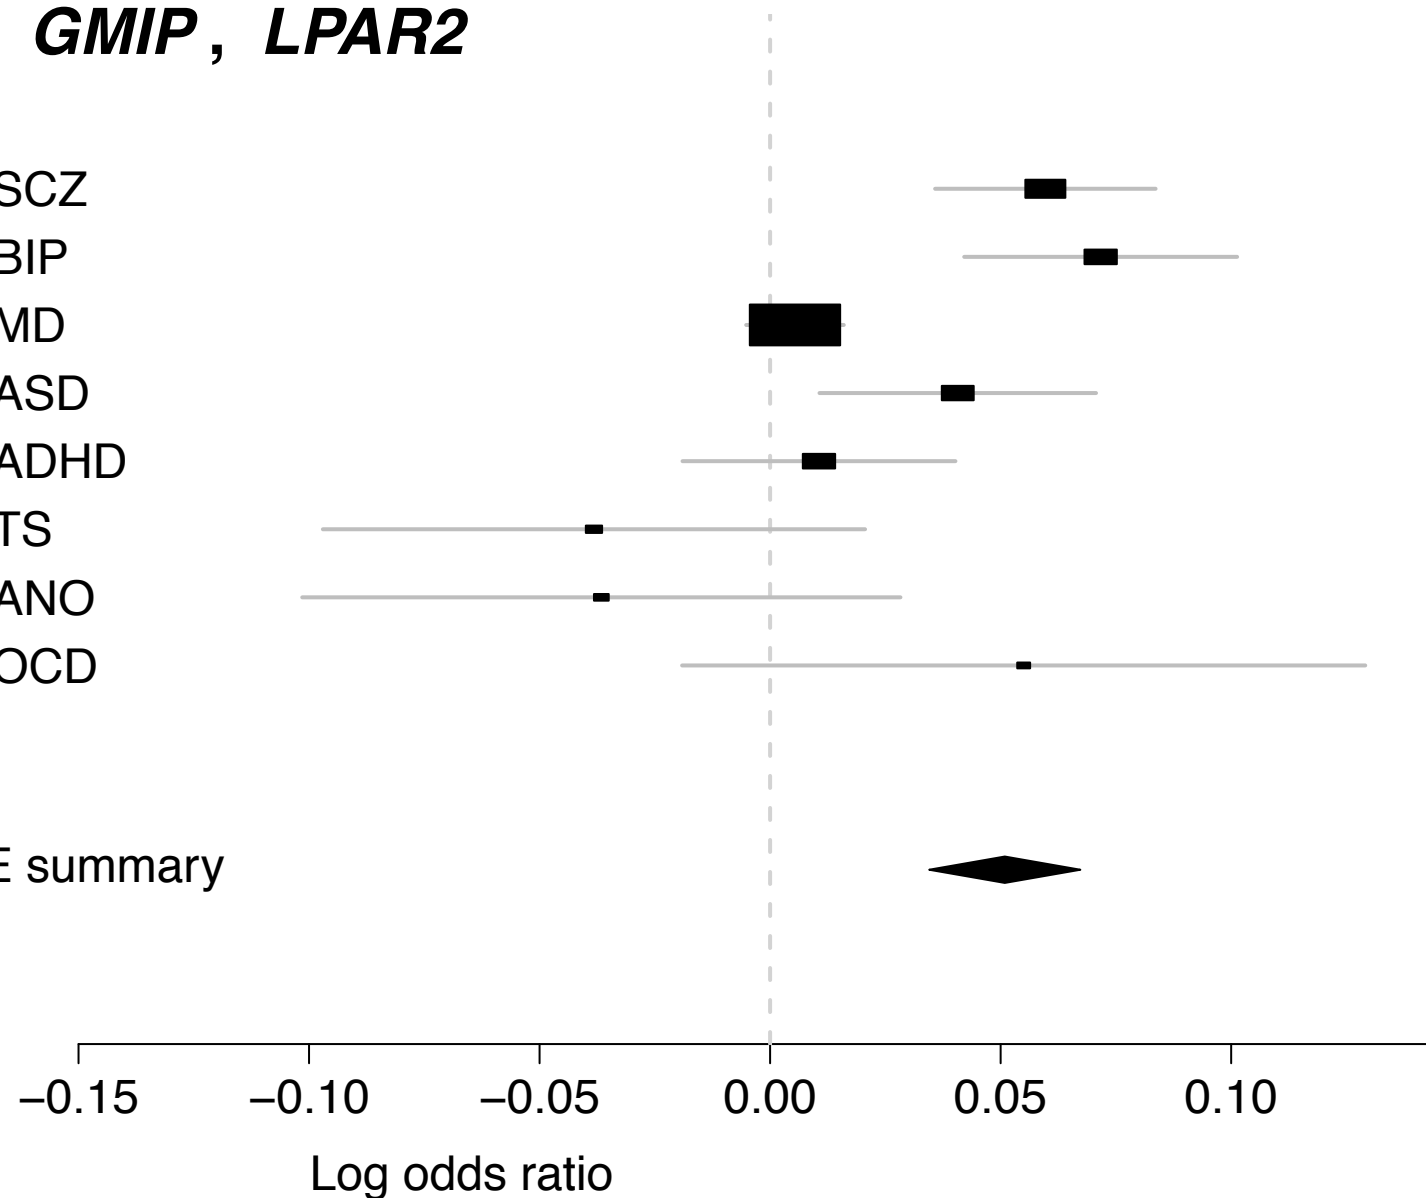

## PM-Plot

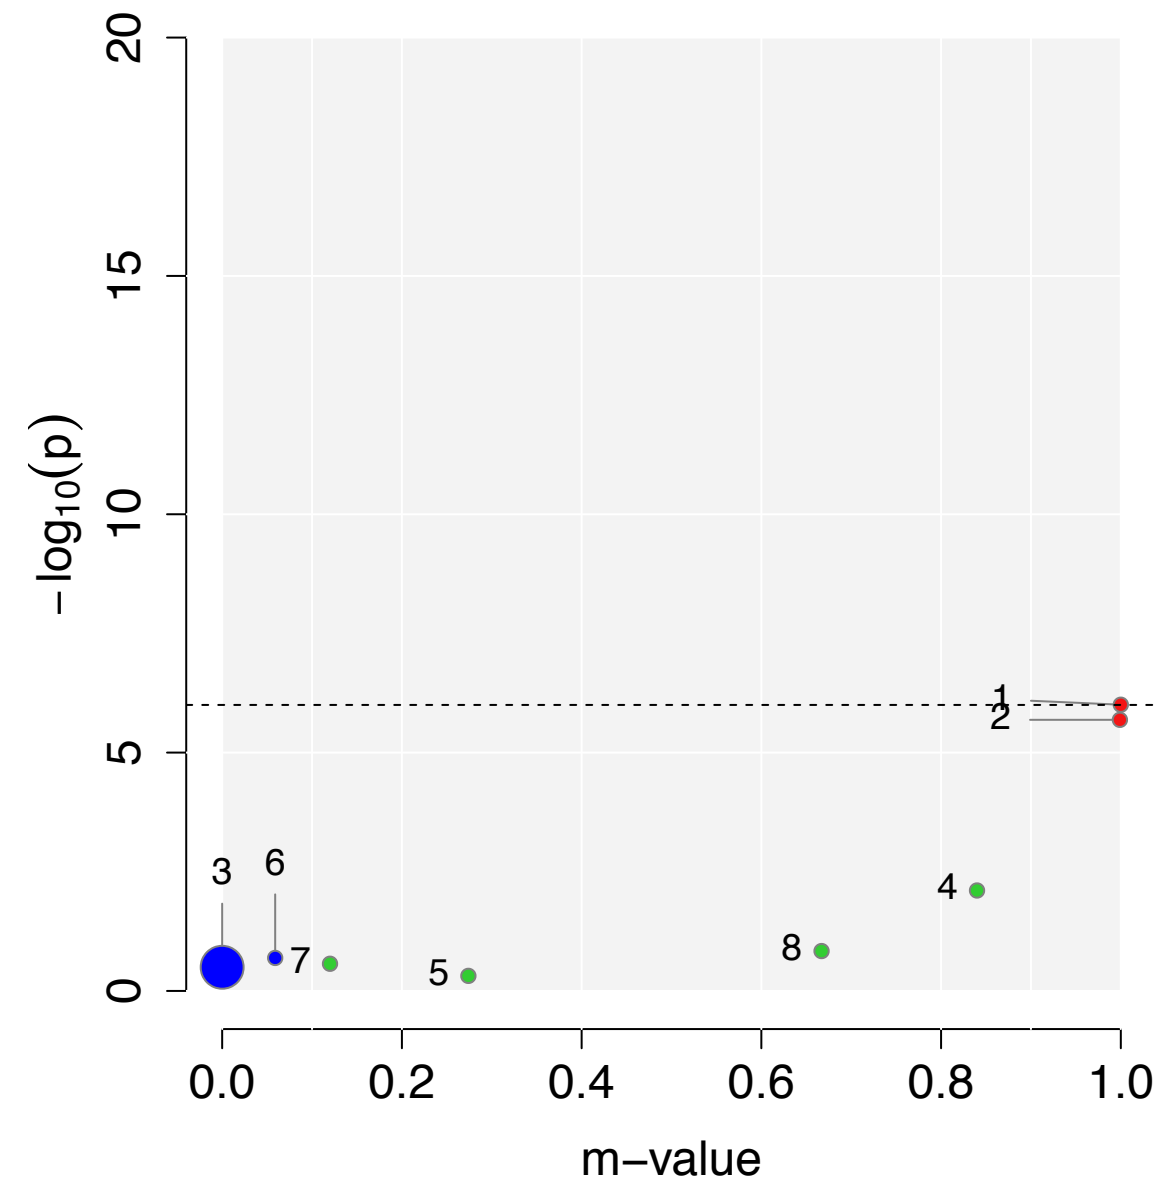

rs915057 (Meta  $P = 2.76 \times 10^{-9}$ )

Gene : *SYNE2*, *ESR2*

GWAS P-value

- 0.2128 ● 1.SCZ
- 0.9648 ● 2.BIP
- $9.26 \times 10^{-10}$  ● 3.MD
- 0.0674 ● 4.ASD
- 0.1099 ● 5.ADHD
- 0.2040 ● 6.TS
- 0.0173 ● 7.ANO
- 0.8569 ● 8.OCD

FE summary

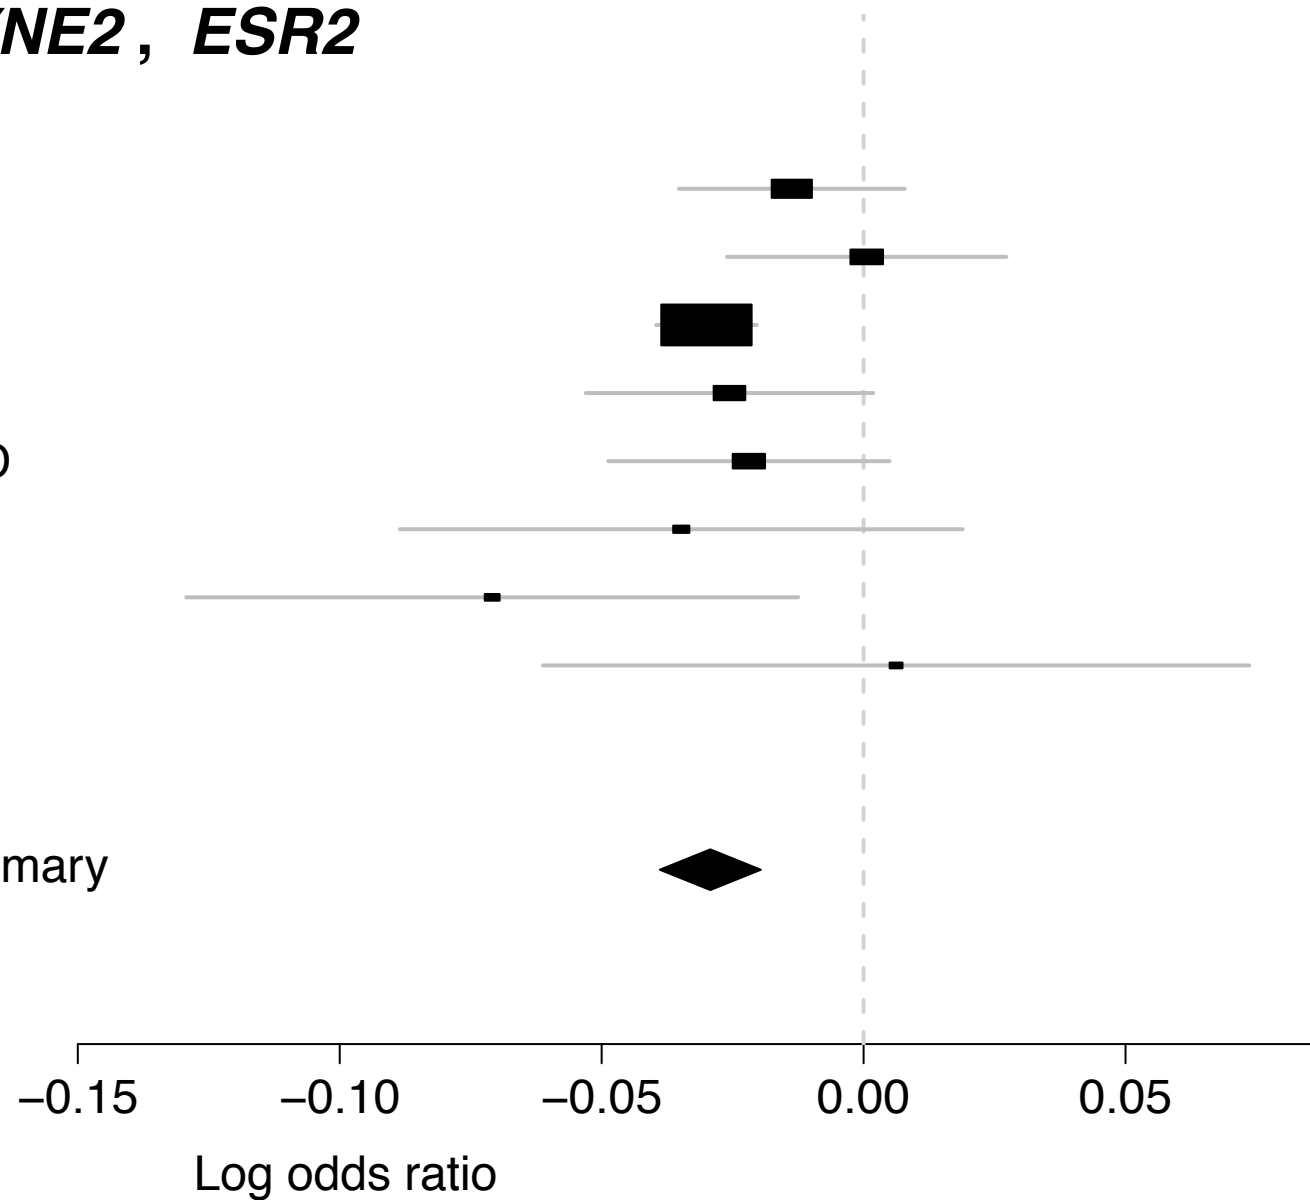

PM-Plot

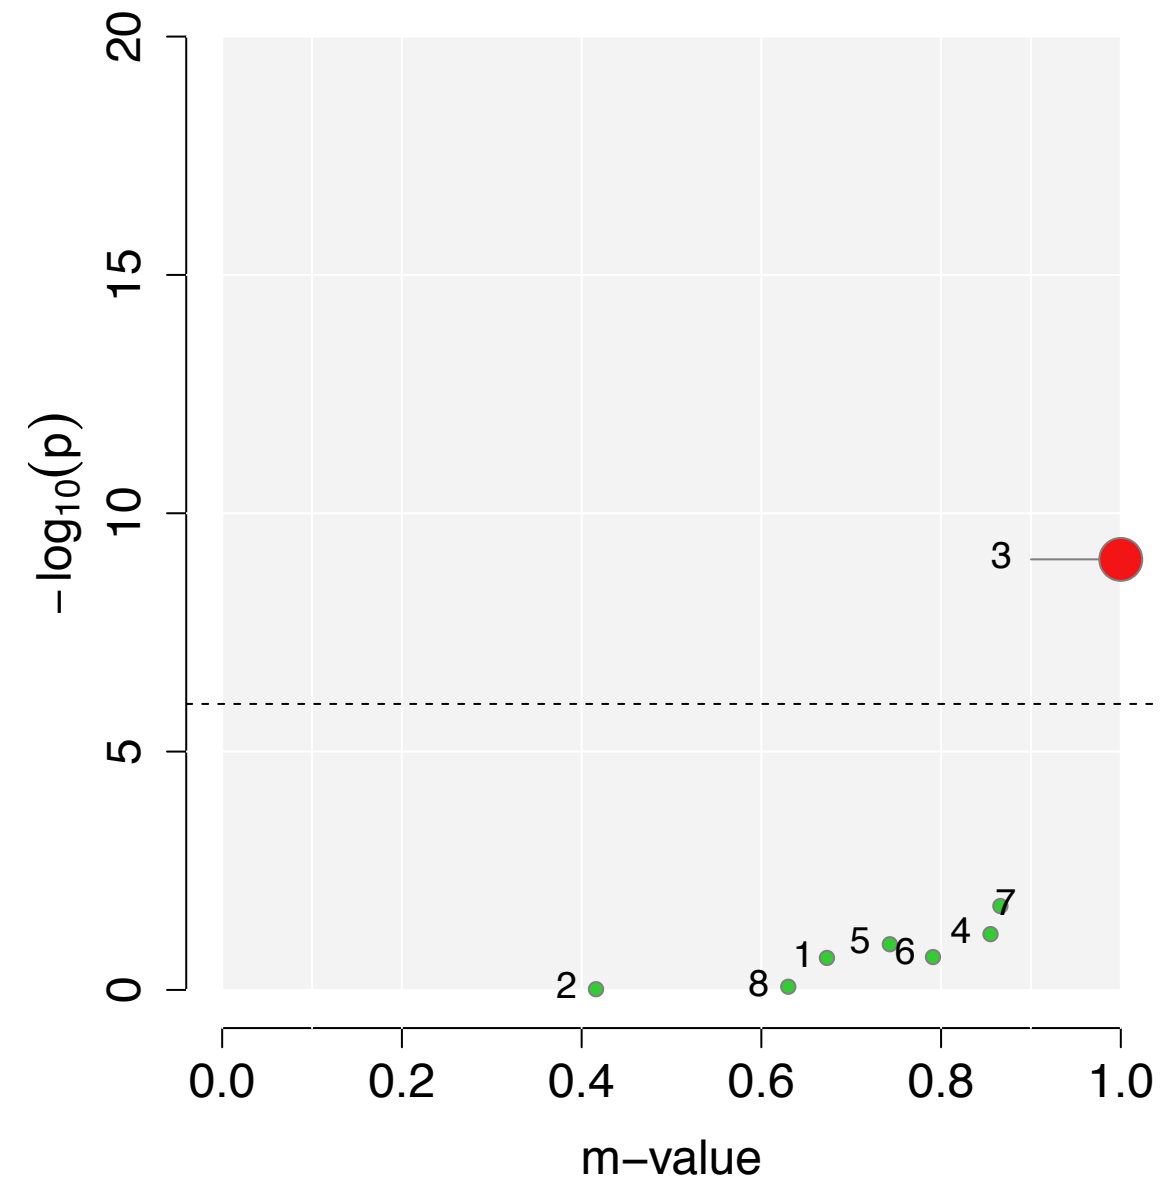



# rs1002656 (Meta $P = 1.15 \times 10^{-8}$ )

Gene : *GRIK3*

## GWAS P-value

- 0.0057 ● 1.SCZ
- 0.0139 ● 2.BIP
- $5.83 \times 10^{-8}$  ● 3.MD
- 0.1378 ● 4.ASD
- 0.6600 ● 5.ADHD
- 0.3156 ● 6.TS
- 0.6629 ● 7.ANO
- 0.1869 ● 8.OCD

FE summary

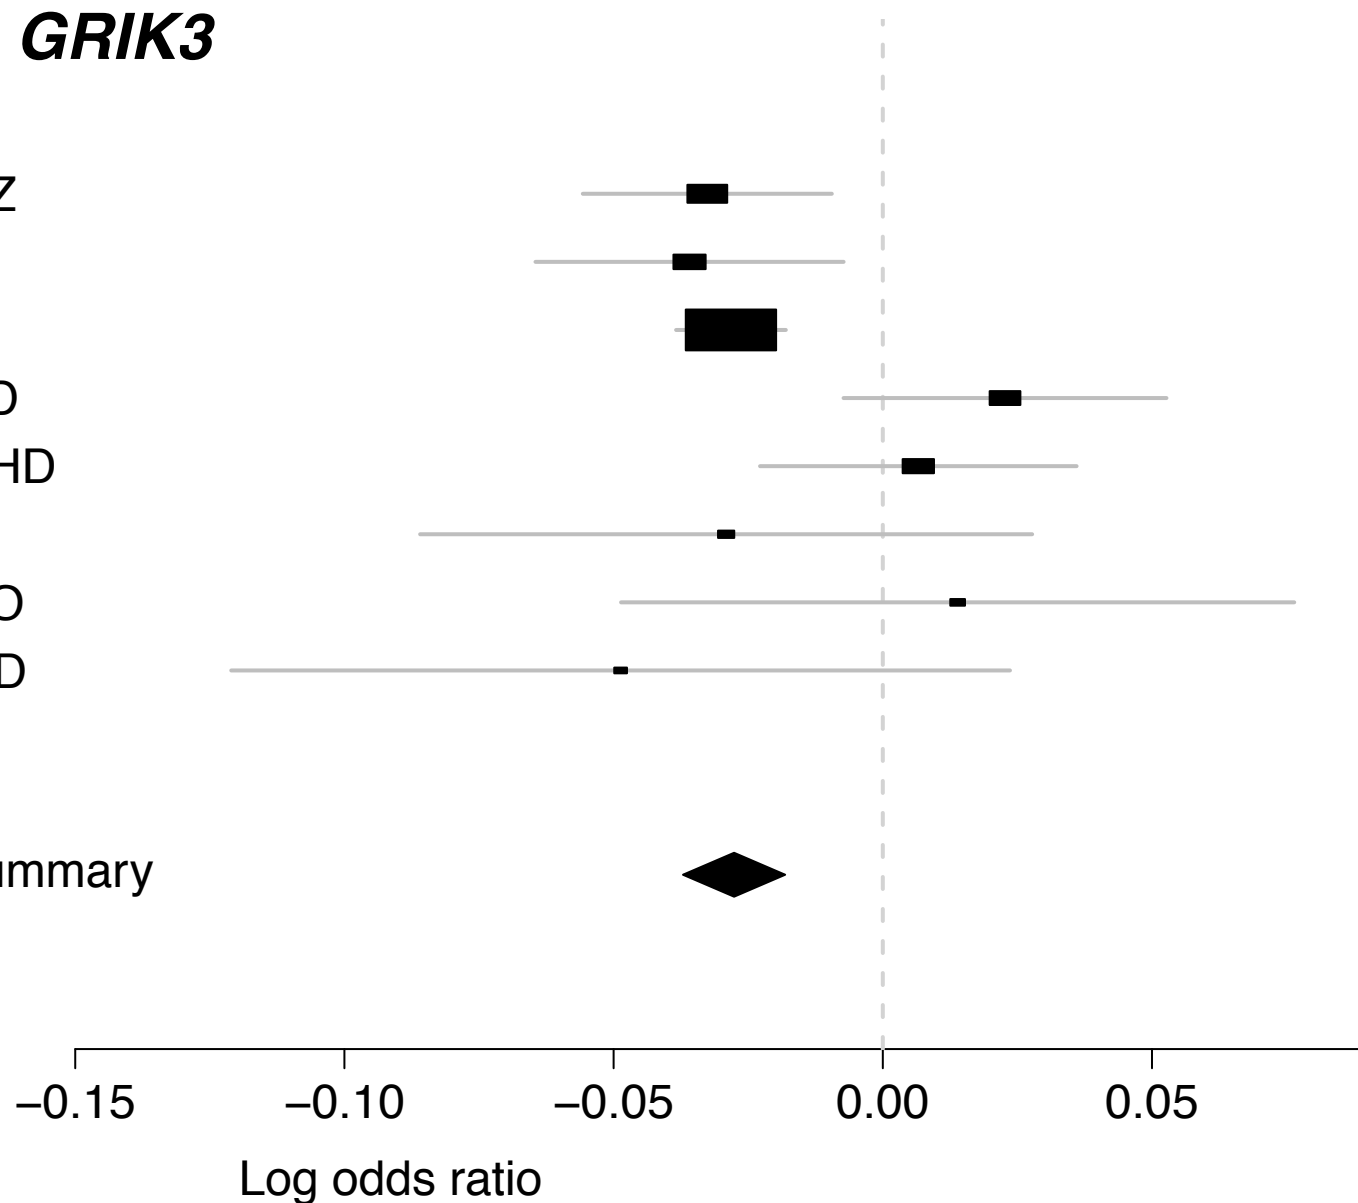

## PM-Plot

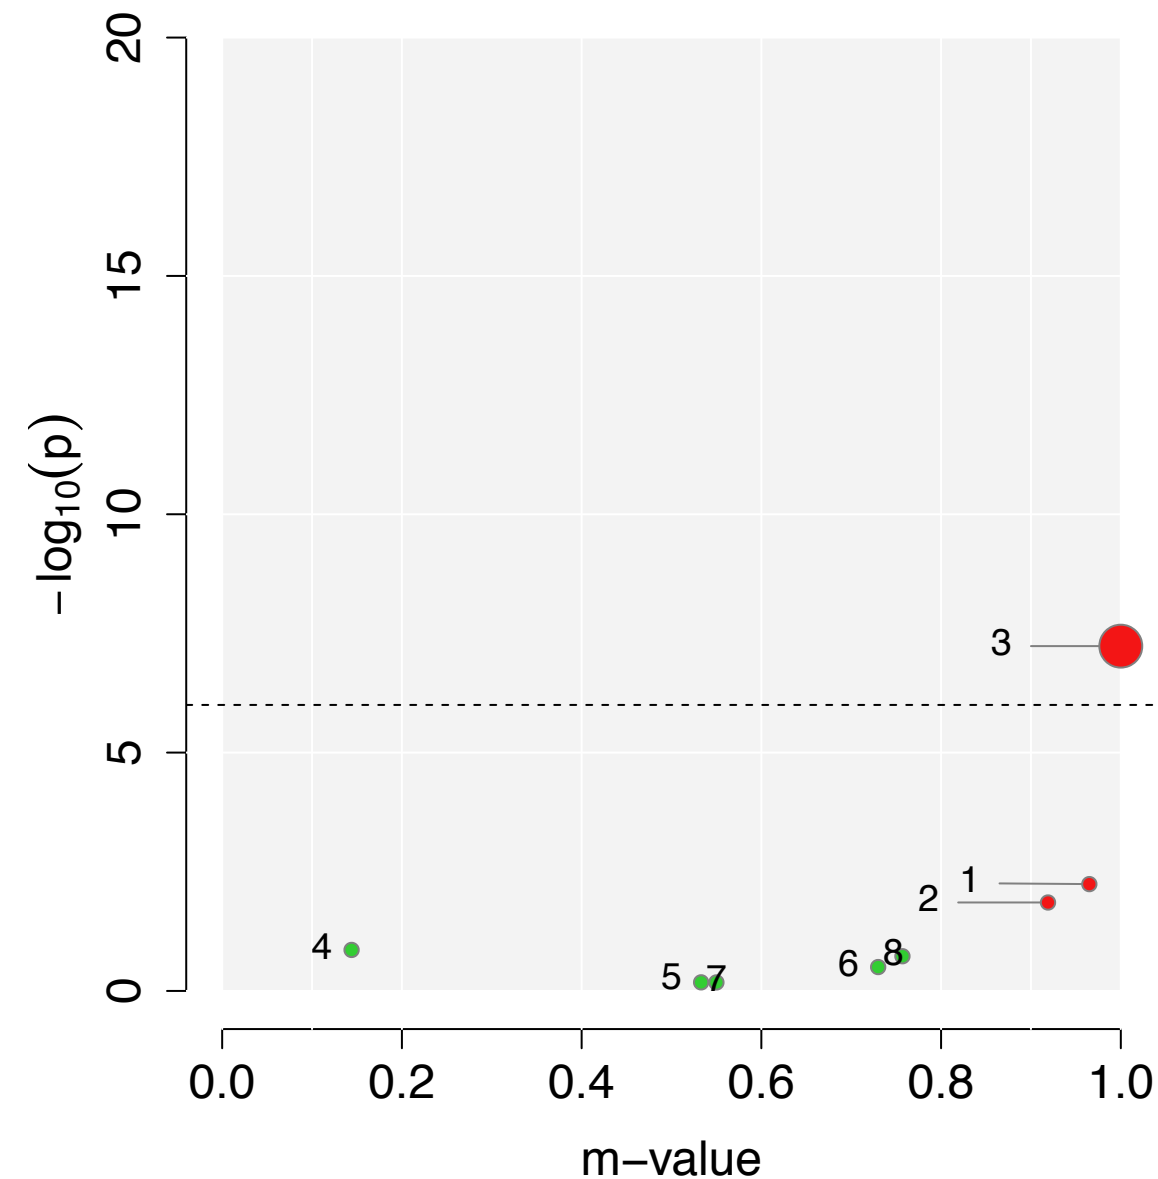

# rs1226412 (Meta $P = 2.07 \times 10^{-8}$ )

Gene : *NR4A2*

## GWAS P-value

- 0.2232 ● 1.SCZ
- 0.1415 ● 2.BIP
- $1.82 \times 10^{-8}$  ● 3.MD
- 0.4833 ● 4.ASD
- 0.2740 ● 5.ADHD
- 0.0126 ● 6.TS
- 0.1174 ● 7.ANO
- 0.0434 ● 8.OCD

FE summary

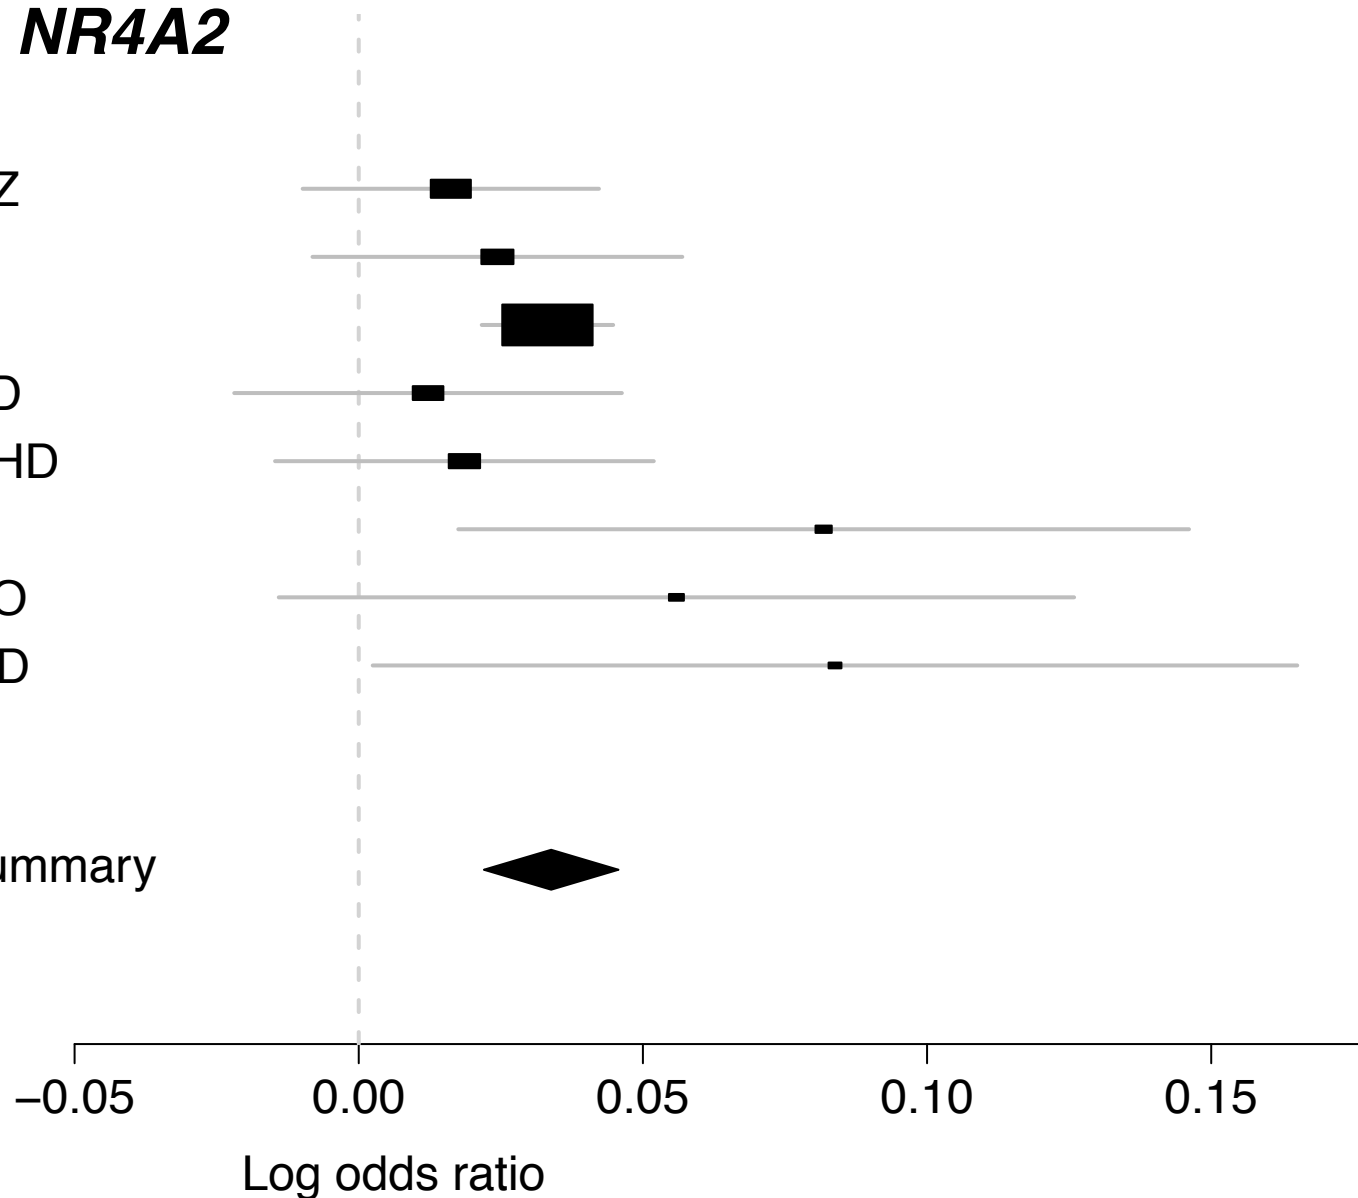

## PM-Plot

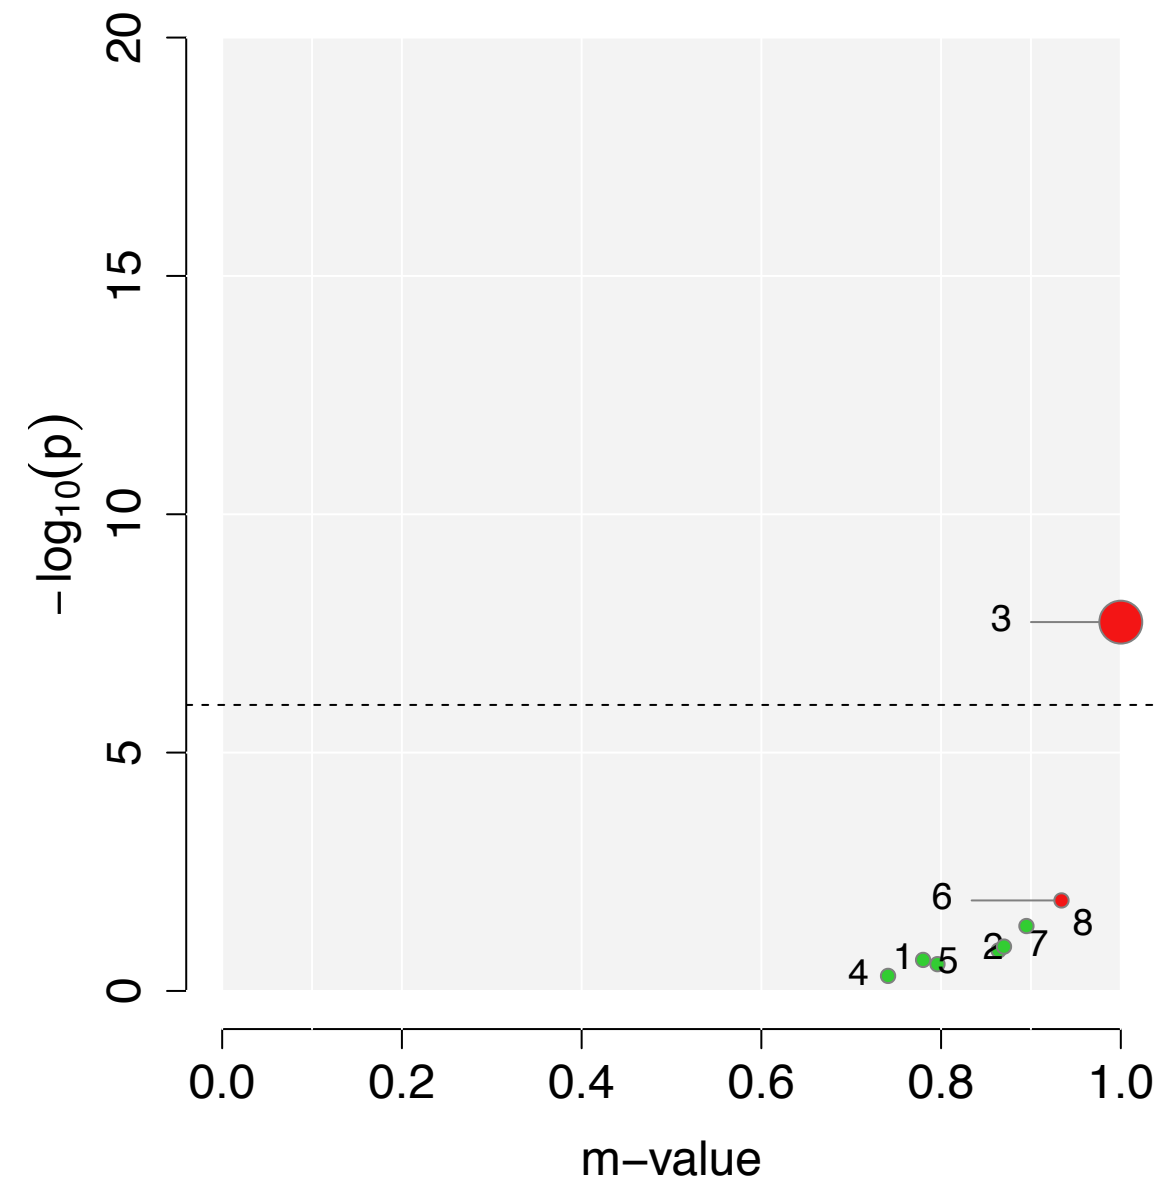

# rs1484144 (Meta $P = 4.24 \times 10^{-9}$ )

Gene : *NAA11*

## GWAS P-value

- 0.0002 ● 1.SCZ
- 0.0073 ● 2.BIP
- $3.06 \times 10^{-6}$  ● 3.MD
- 0.0141 ● 4.ASD
- $2.05 \times 10^{-6}$  ● 5.ADHD
- 0.6078 ● 6.TS
- 0.3156 ● 7.ANO
- 0.7845 ● 8.OCD

FE summary

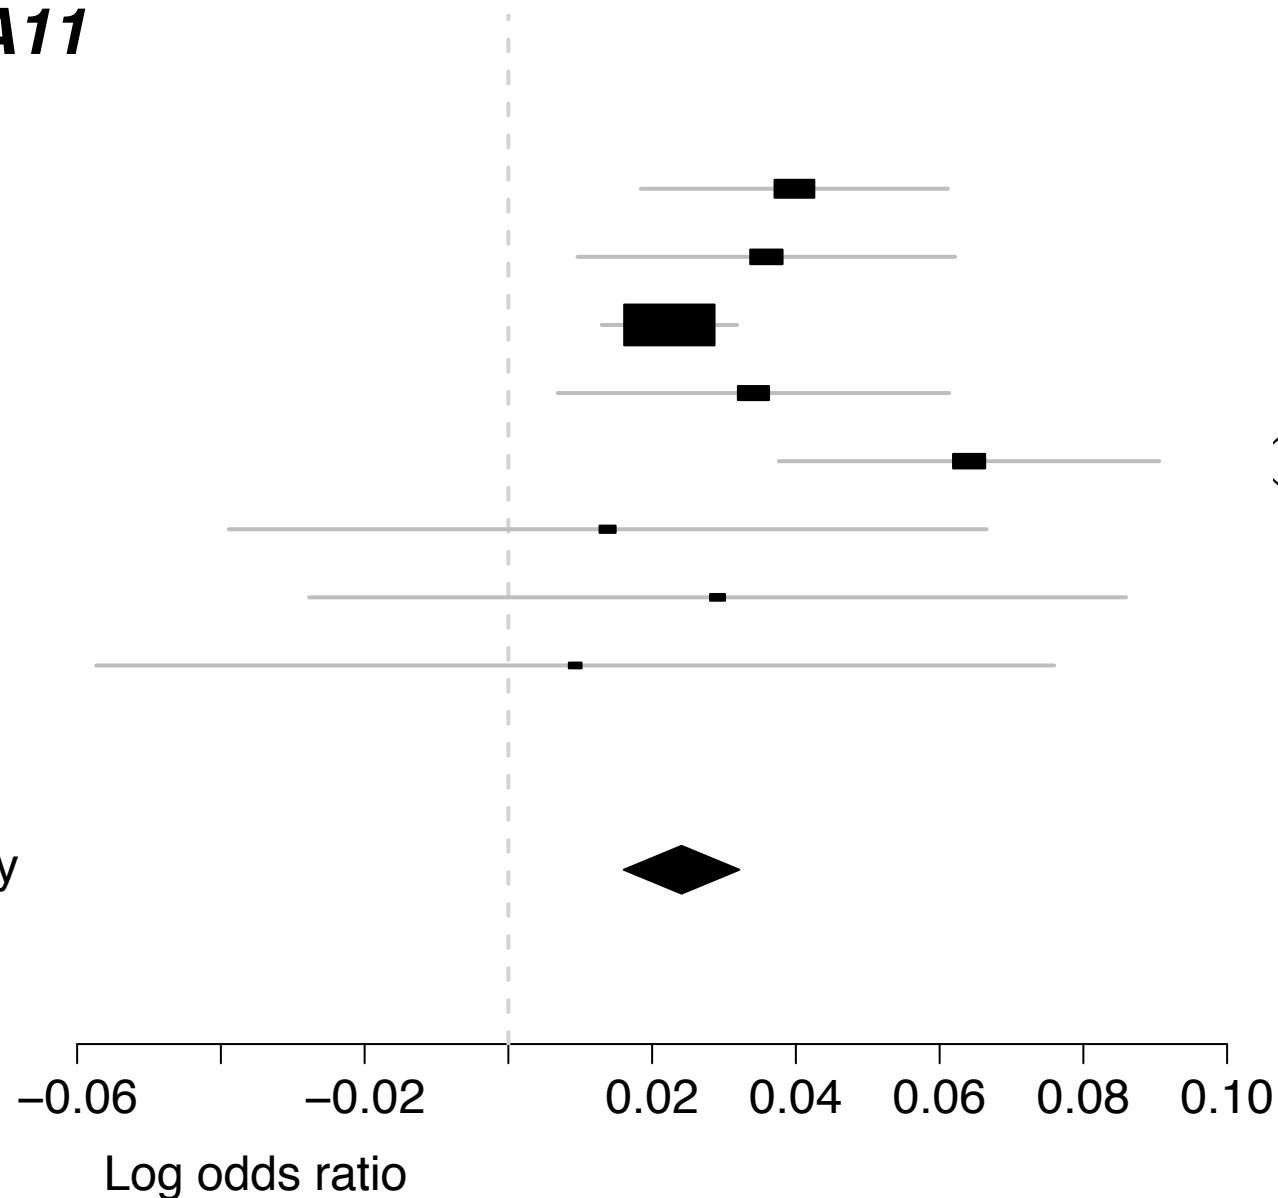

## PM-Plot

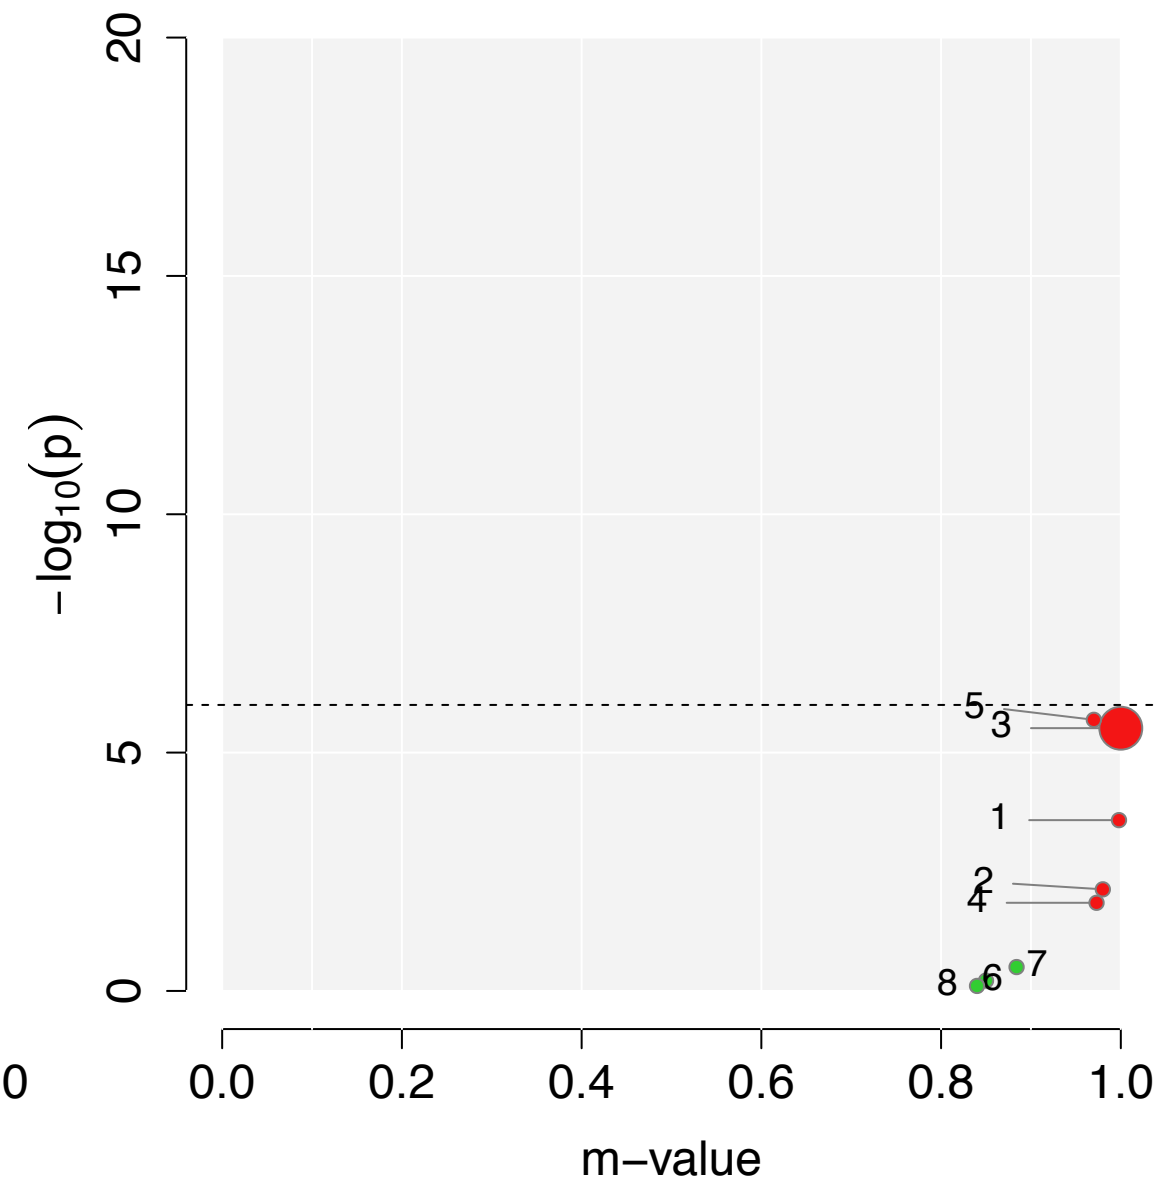

# rs1501361 (Meta $P = 3.97 \times 10^{-8}$ )

Gene : *HCN1*

## GWAS P-value

- $1.15 \times 10^{-6}$  ● 1.SCZ
- 0.0001 ● 2.BIP
- 0.7425 ● 3.MD
- 0.9779 ● 4.ASD
- 0.5544 ● 5.ADHD
- 0.0026 ● 6.TS
- 0.7634 ● 7.ANO
- 0.6619 ● 8.OCD

FE summary

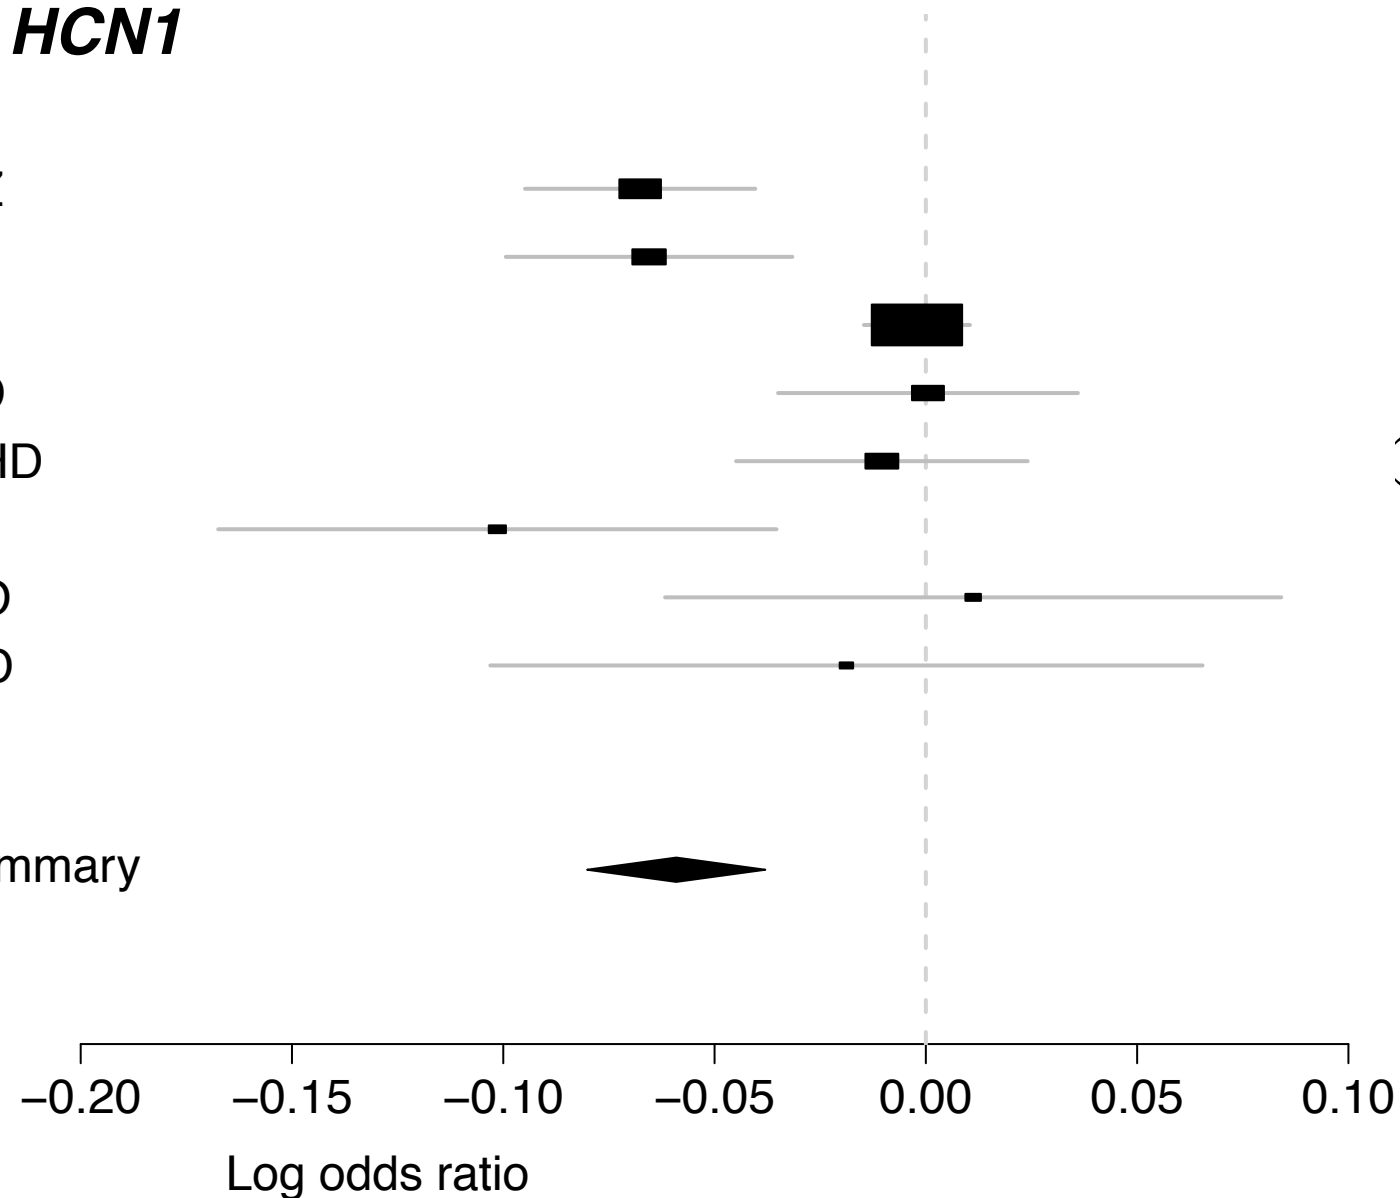

## PM-Plot

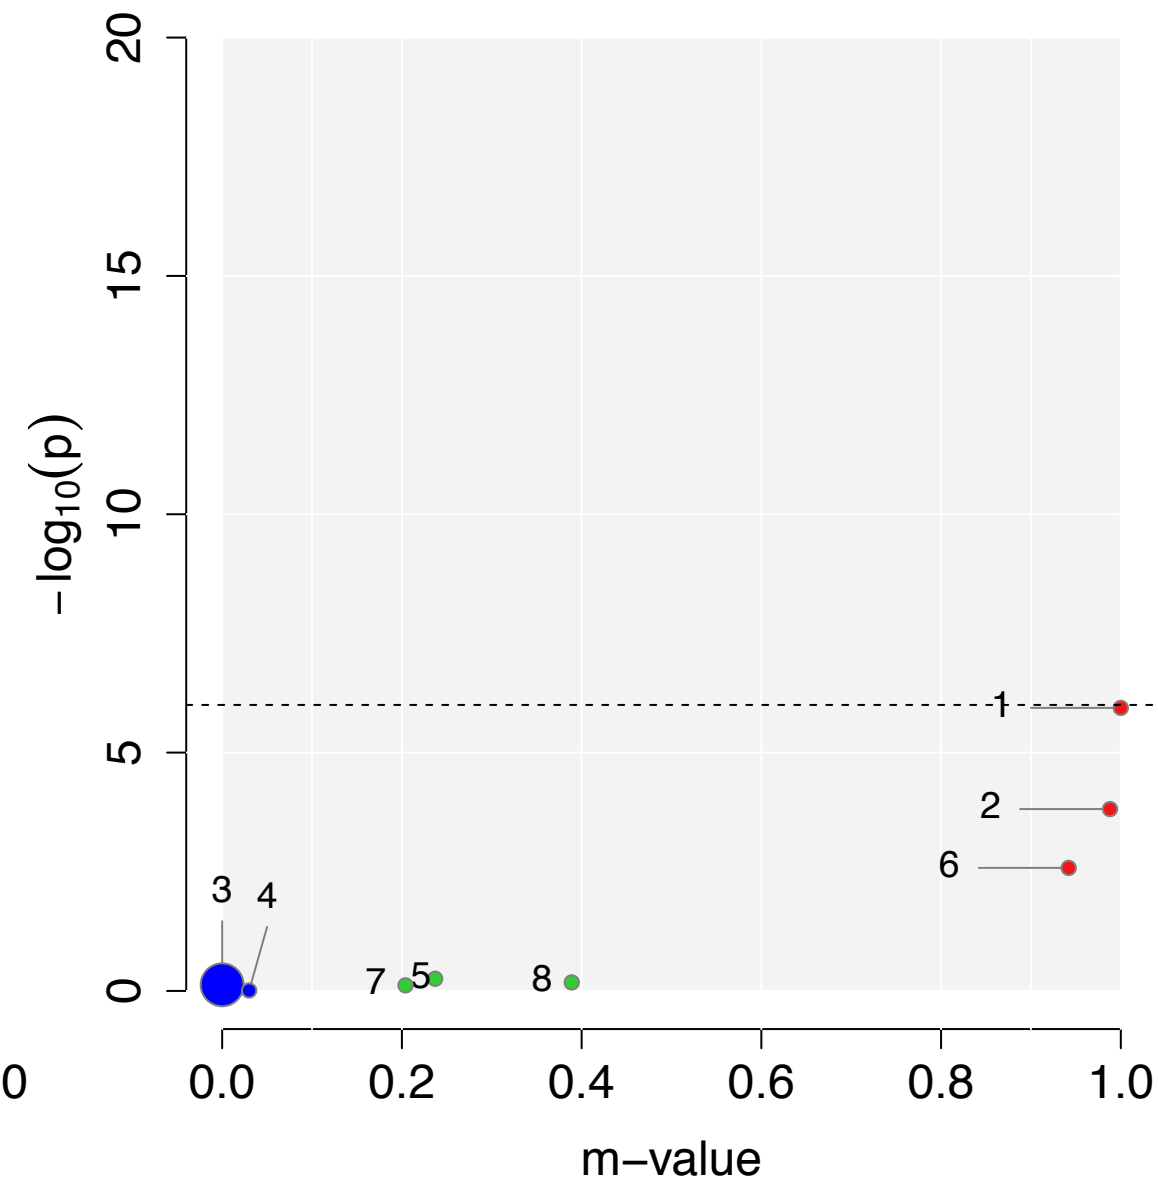

# rs1518367 (Meta $P = 1.06 \times 10^{-11}$ )

Gene : *PLCL1*

## GWAS P-value

- $2.82 \times 10^{-8}$  ● 1.SCZ
- 0.0008 ● 2.BIP
- $2.50 \times 10^{-7}$  ● 3.MD
- 0.0790 ● 4.ASD
- 0.0106 ● 5.ADHD
- 0.2833 ● 6.TS
- 0.8309 ● 7.ANO
- 0.3786 ● 8.OCD

FE summary

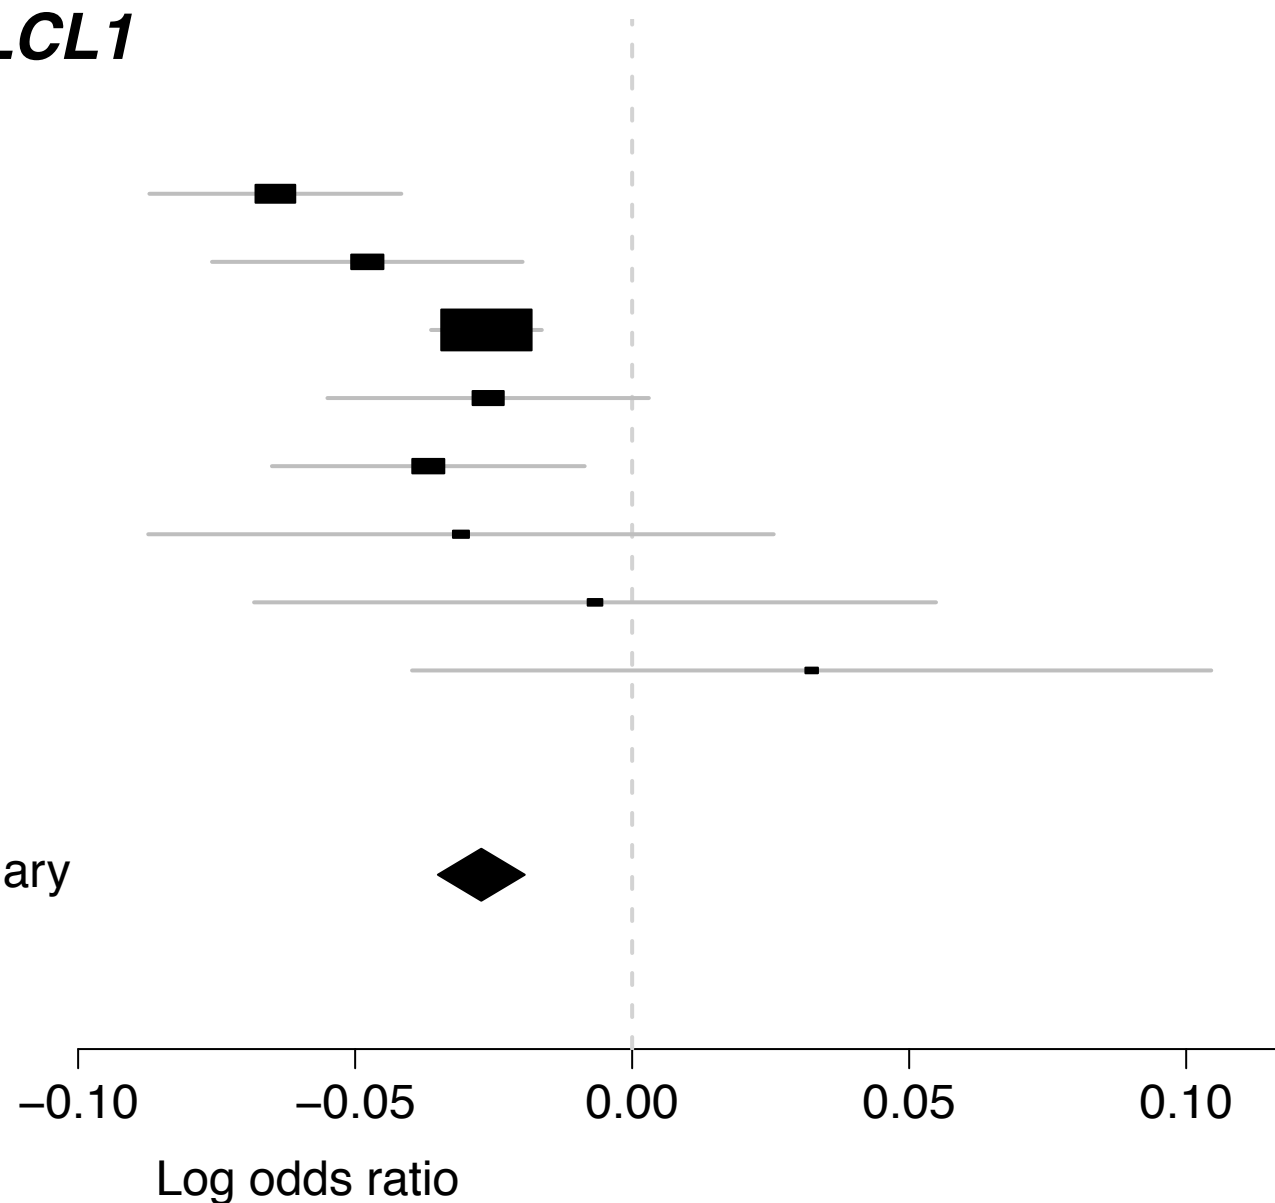

## PM-Plot

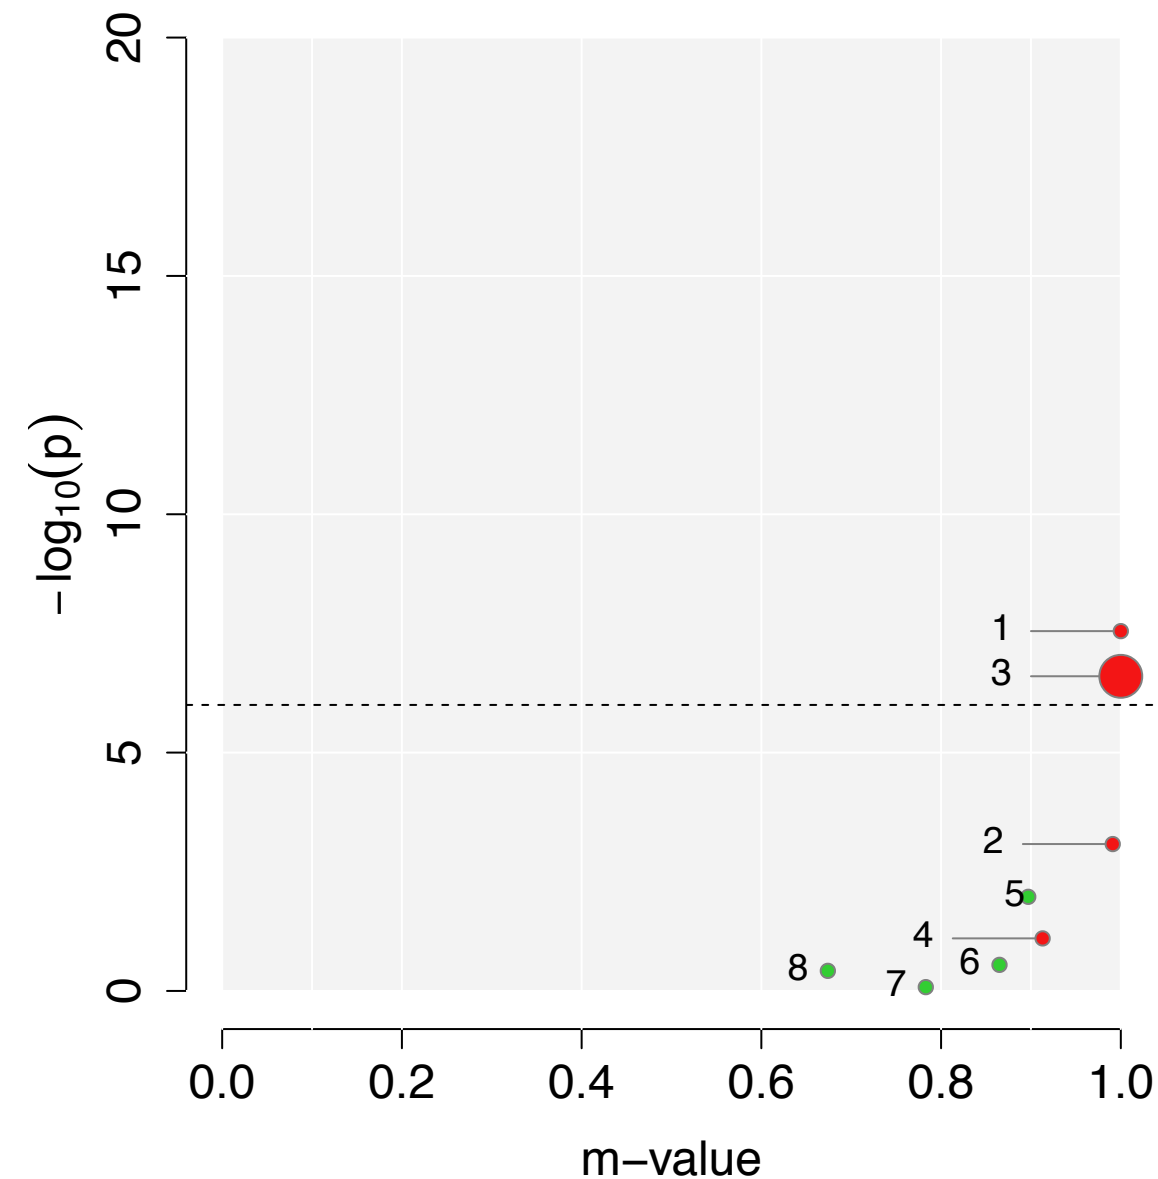

# rs1615350 (Meta $P = 5.06 \times 10^{-10}$ )

Gene : *MPHOSPH9*, *PITPNM2*

## GWAS P-value

- 4.55 x 10<sup>-12</sup> ● 1.SCZ
- 0.0539 ● 2.BIP
- 0.3255 ● 3.MD
- 0.7324 ● 4.ASD
- 0.0351 ● 5.ADHD
- 0.0003 ● 6.TS
- 0.3616 ● 7.ANO
- 0.6142 ● 8.OCD

FE summary

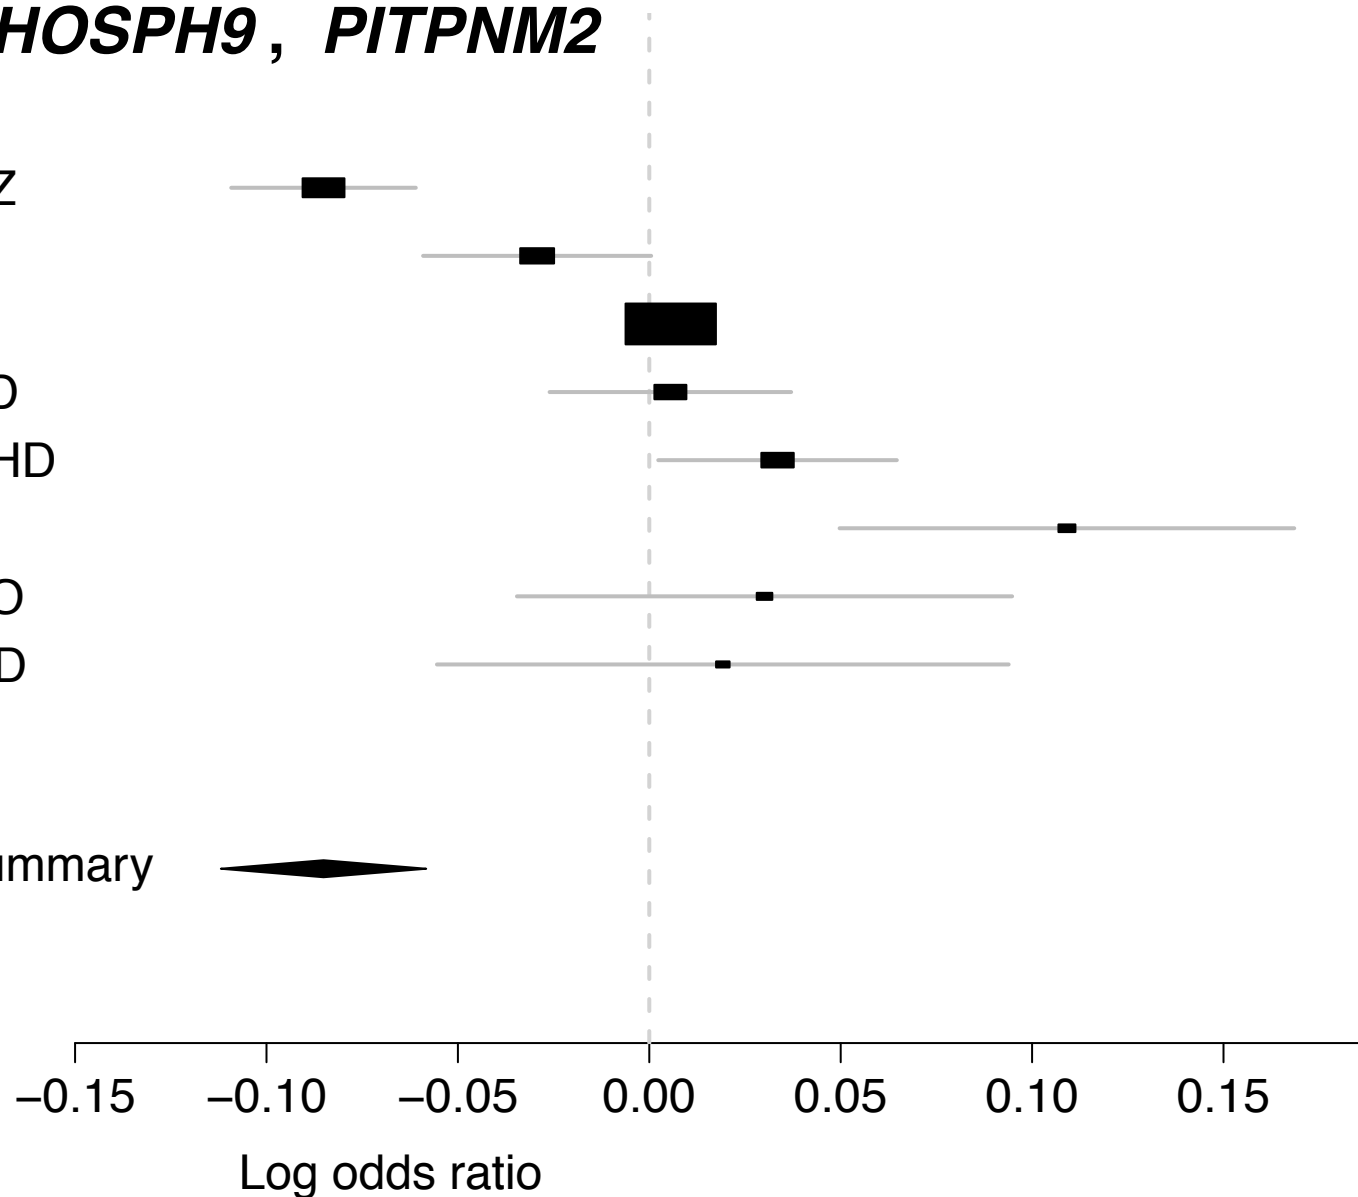

## PM-Plot

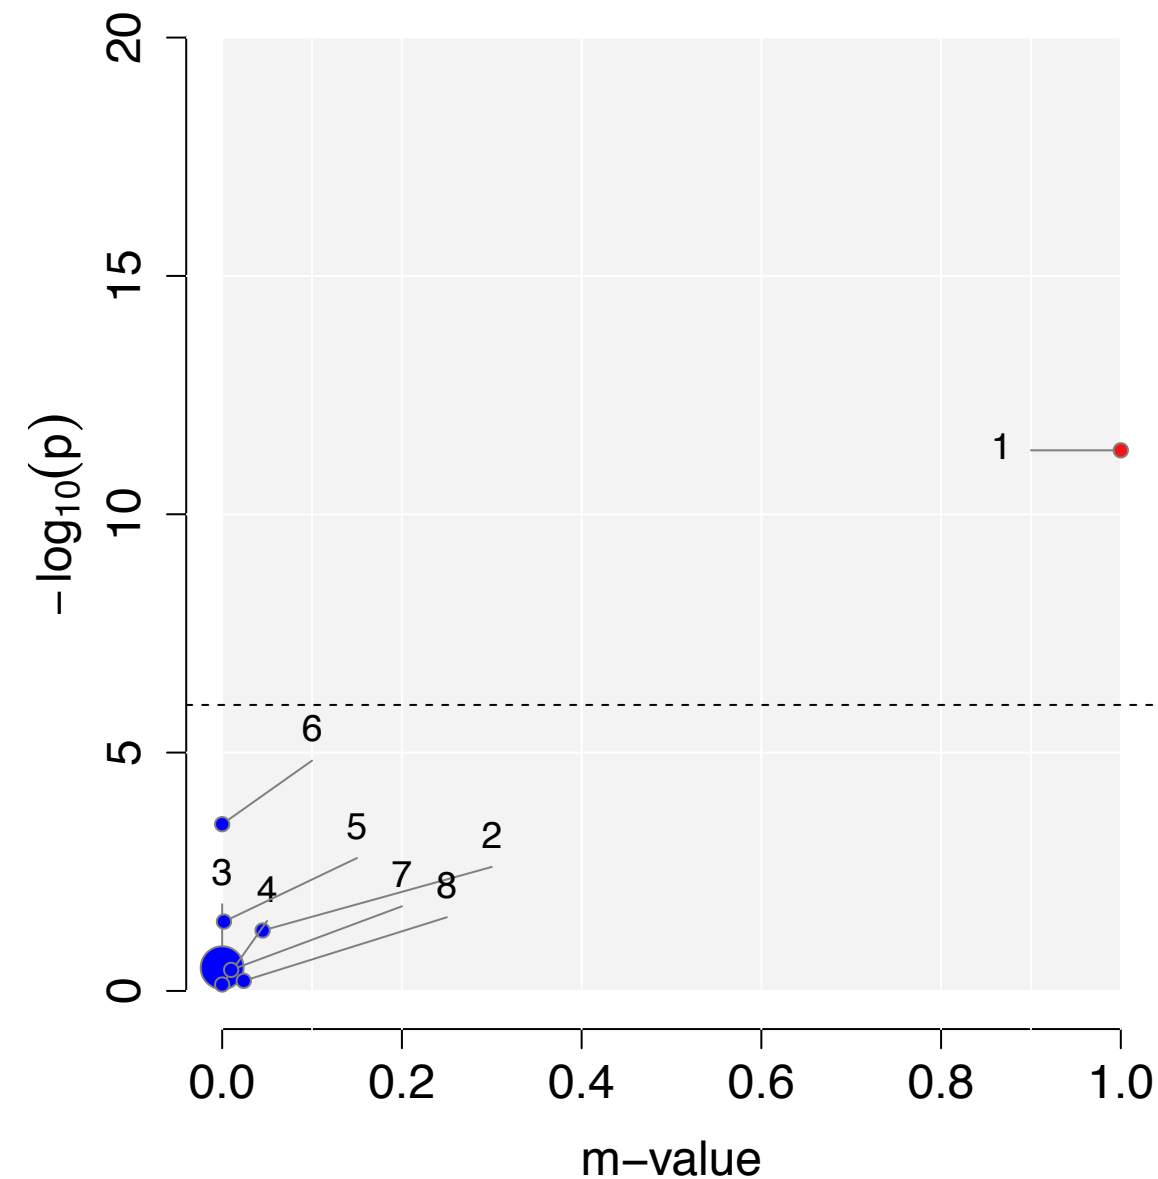

# rs1702294 (Meta $P = 3.03 \times 10^{-16}$ )

Gene : (>200kb)

## GWAS P-value

$9.50 \times 10^{-18}$  ●

1.SCZ

0.3625 ●

2.BIP

0.9485 ●

3.MD

0.0364 ●

4.ASD

0.1618 ●

5.ADHD

0.7775 ●

6.TS

0.4654 ●

7.ANO

0.0440 ●

8.OCD

FE summary

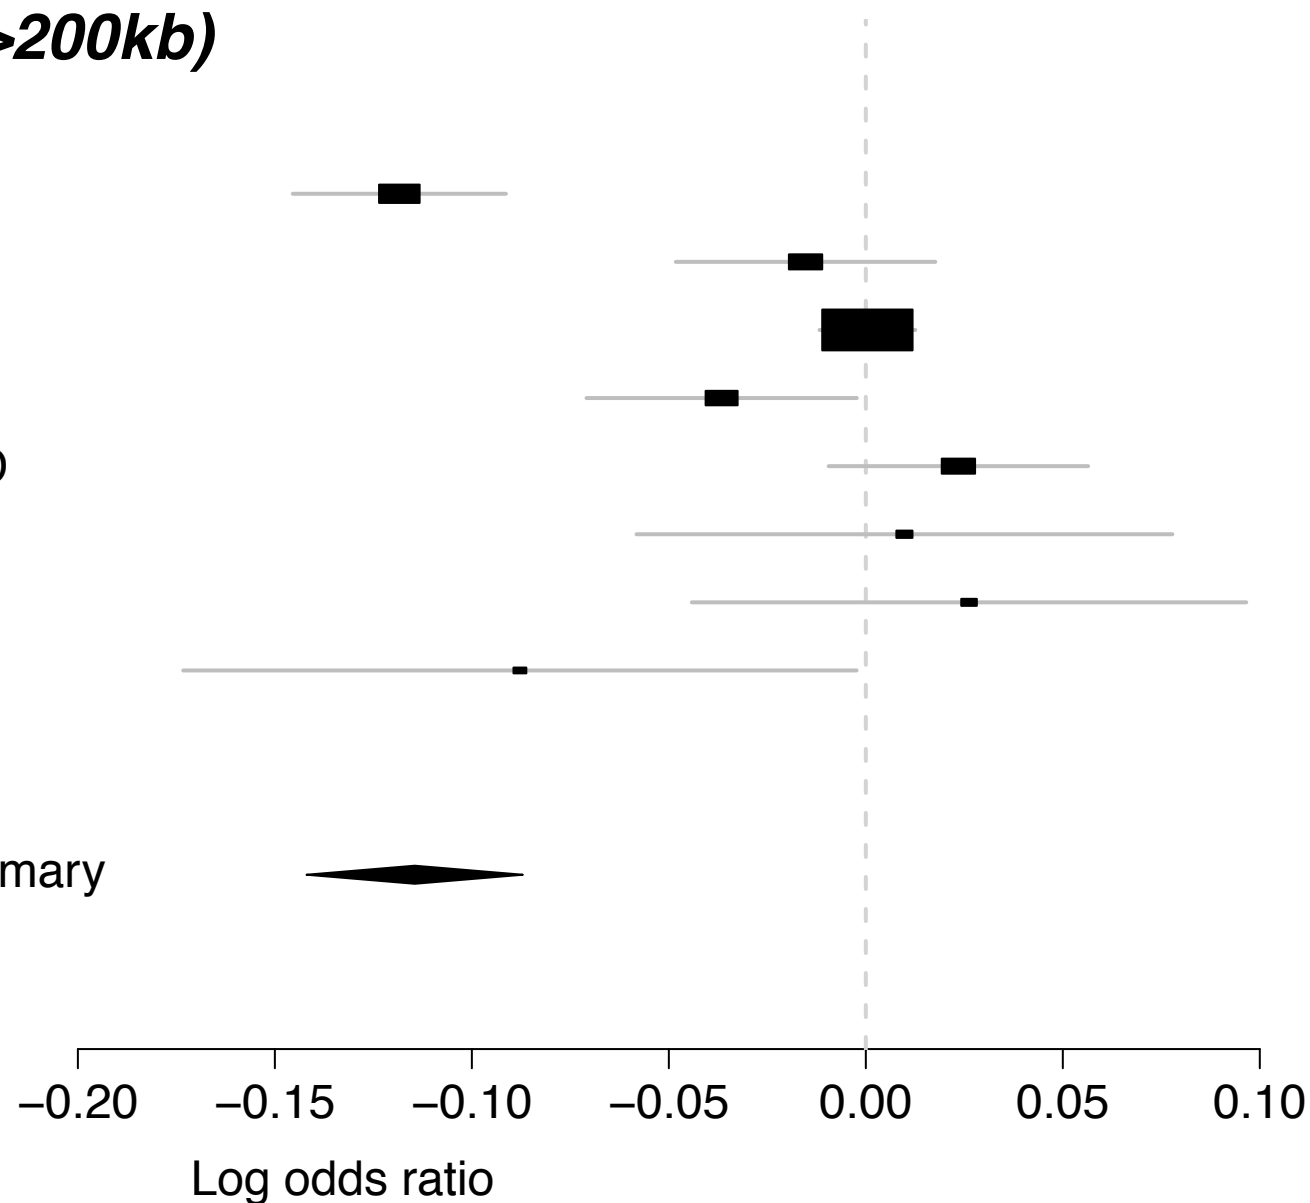

## PM-Plot

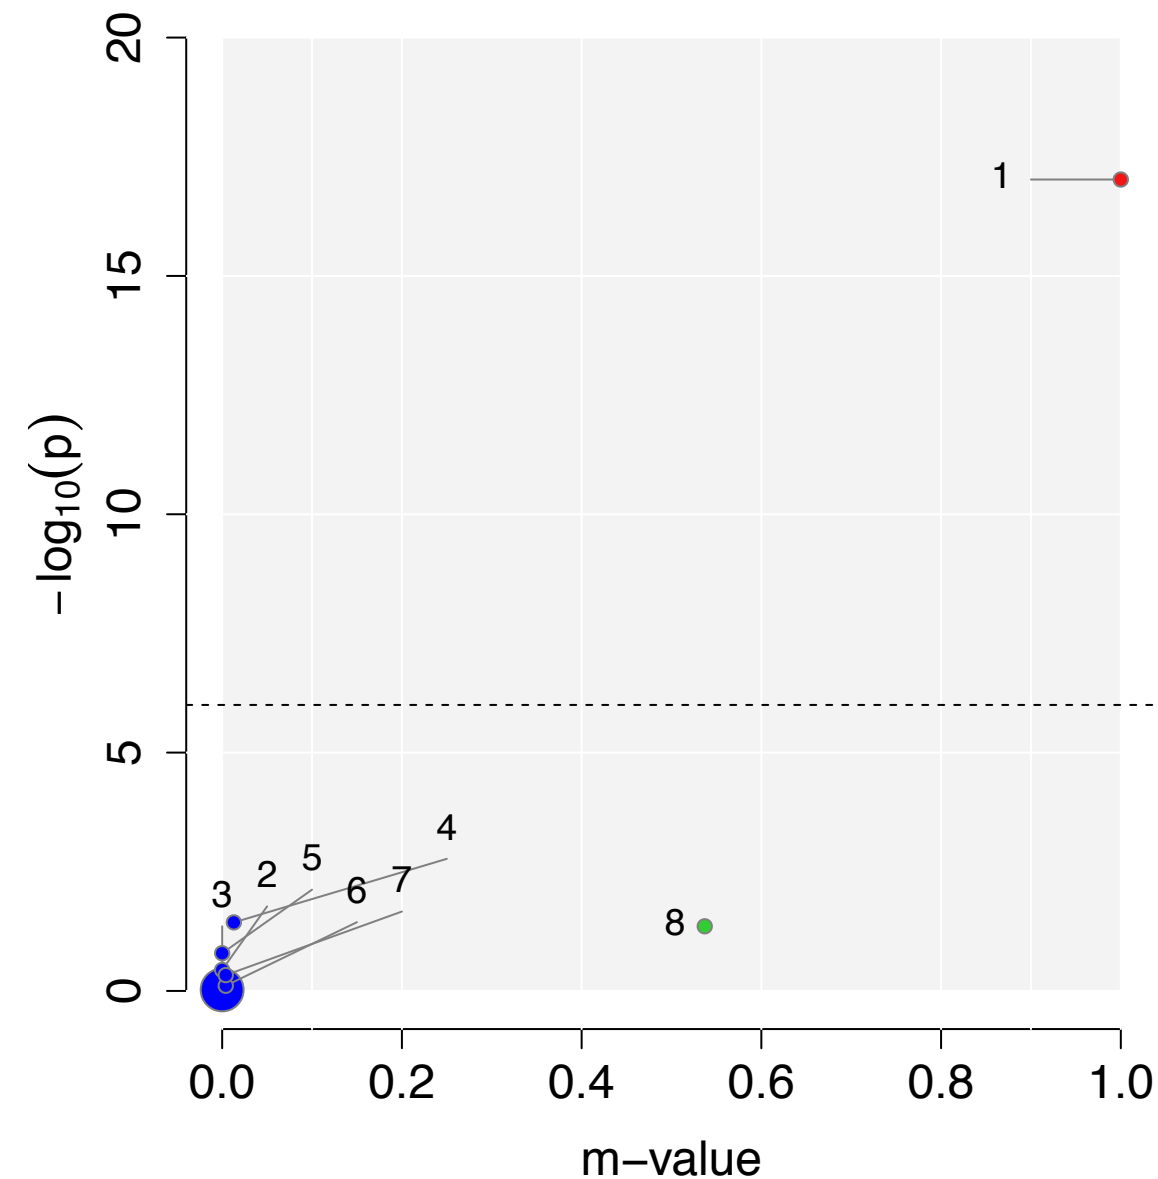

# rs1730054 (Meta $P = 5.81 \times 10^{-10}$ )

Gene : *RSRC1*

## GWAS P-value

- 0.8542 ● 1.SCZ
- 0.0288 ● 2.BIP
- $2.56 \times 10^{-8}$  ● 3.MD
- 0.0001 ● 4.ASD
- 0.0050 ● 5.ADHD
- 0.4081 ● 6.TS
- 0.1661 ● 7.ANO
- 0.0132 ● 8.OCD

FE summary

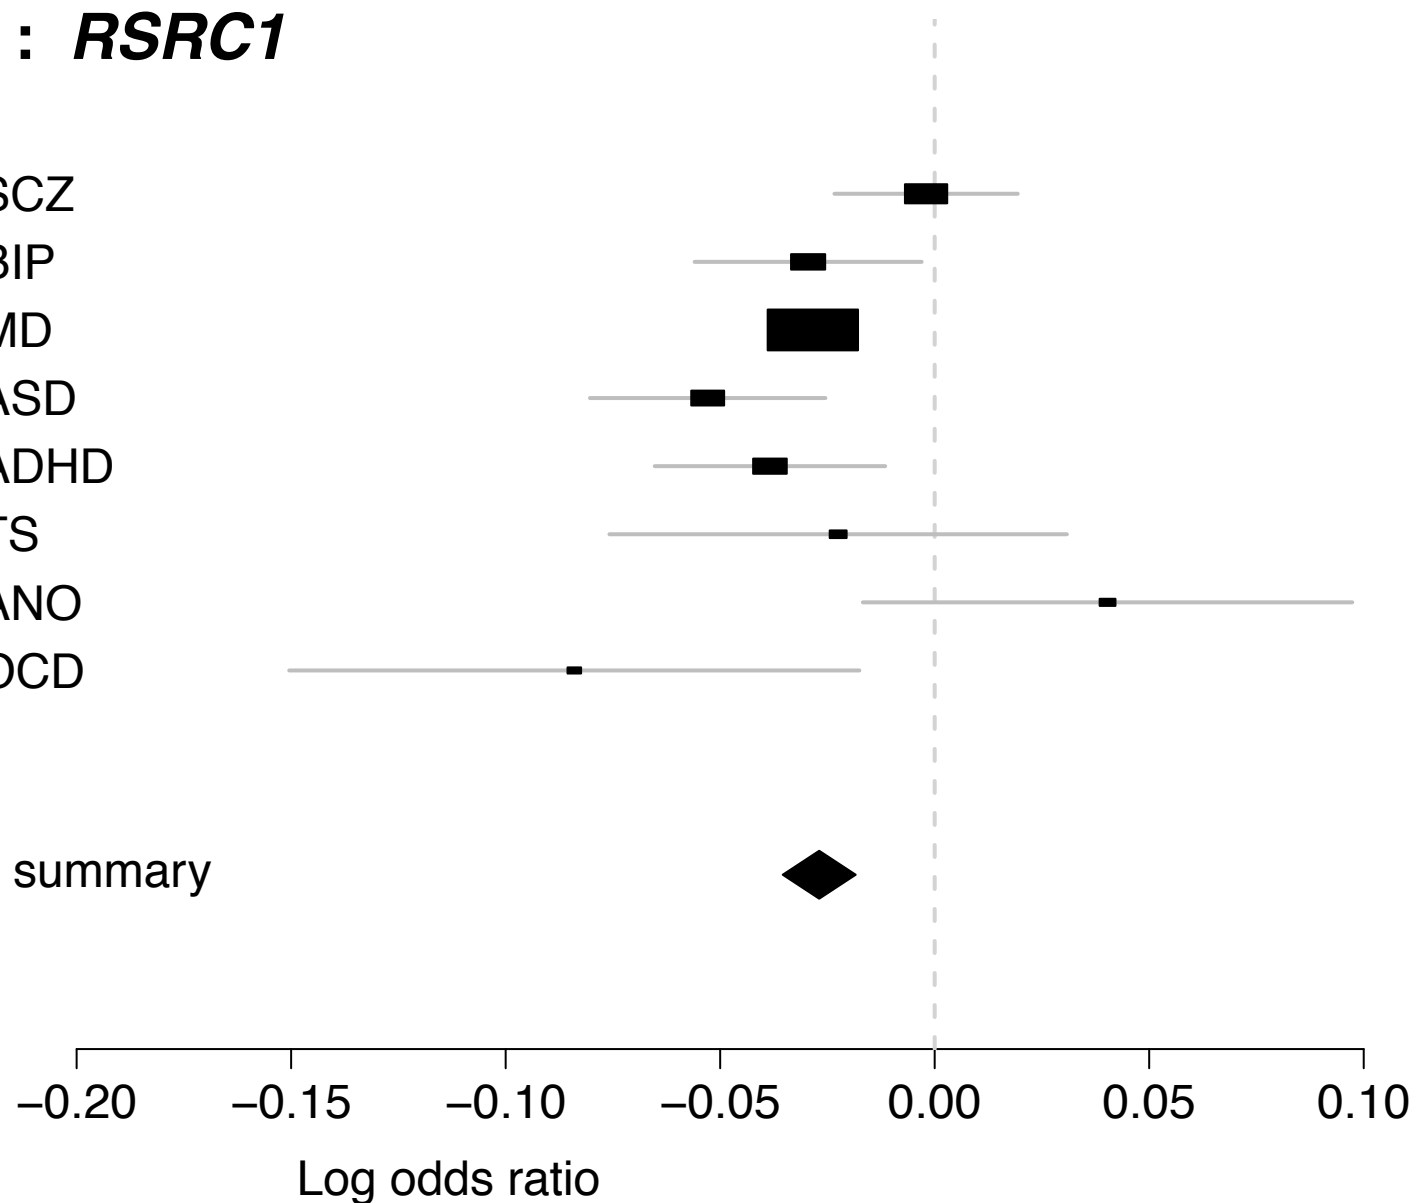

## PM-Plot

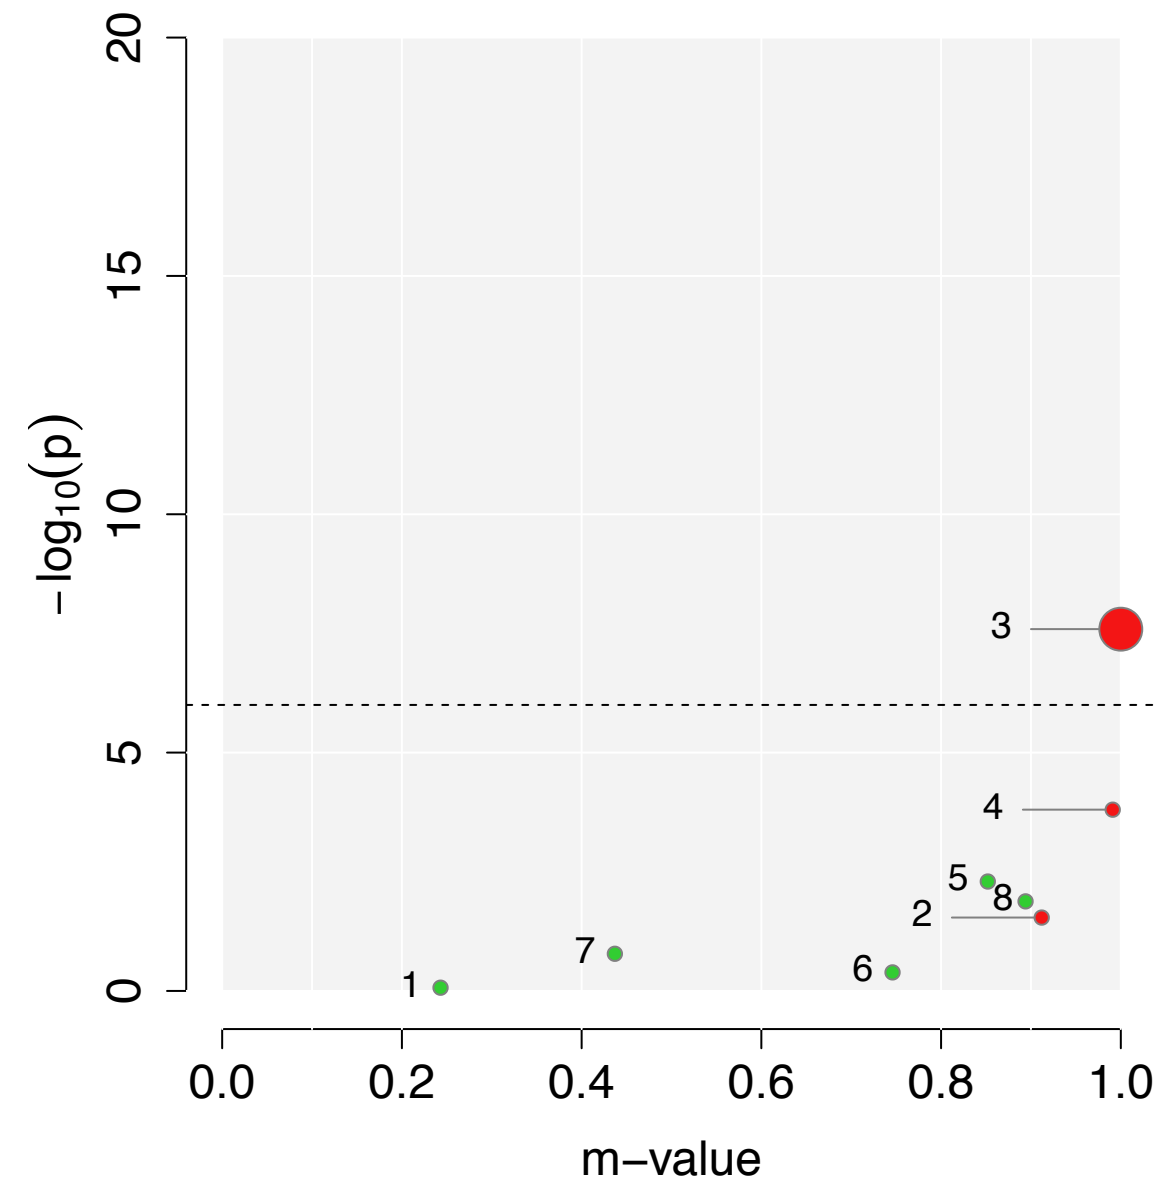



# rs1806153 (Meta $P = 1.1e \times 10^{-9}$ )

Gene : *PAX6*, *ELP4*

## GWAS P-value

- 0.2701 ● 1.SCZ
- 0.9572 ● 2.BIP
- $9.43 \times 10^{-10}$  ● 3.MD
- 0.0006 ● 4.ASD
- 0.2791 ● 5.ADHD
- 0.3045 ● 6.TS
- 0.4847 ● 7.ANO
- 0.2514 ● 8.OCD

FE summary

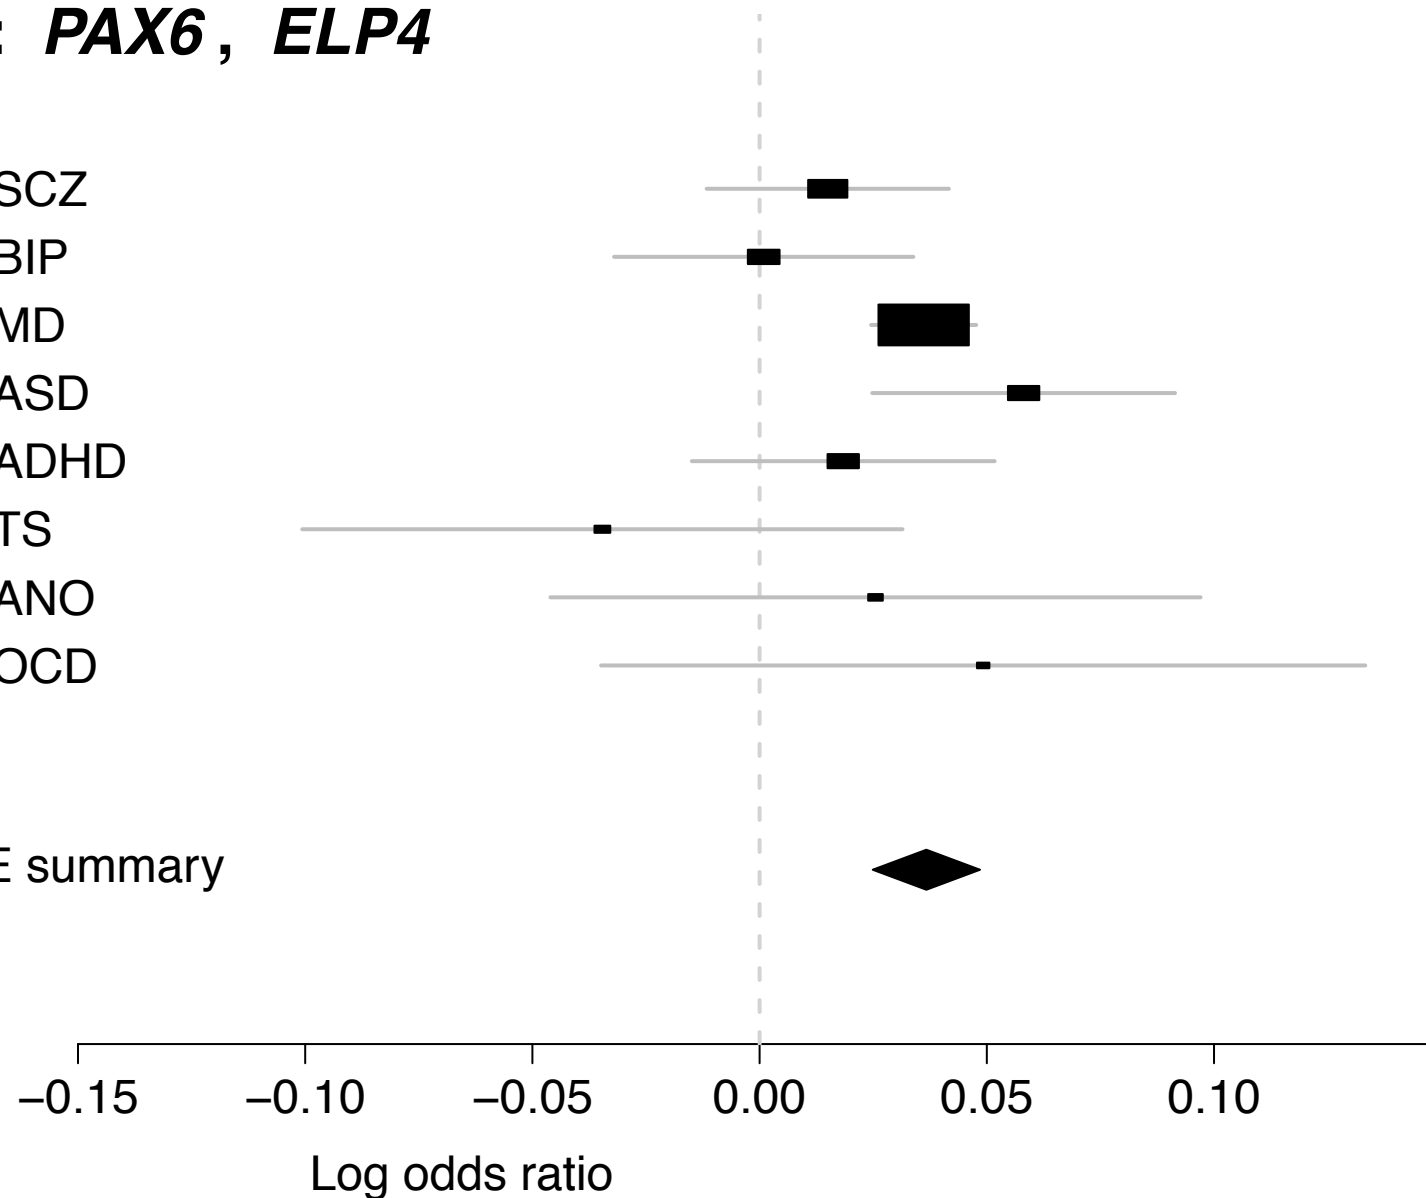

## PM-Plot

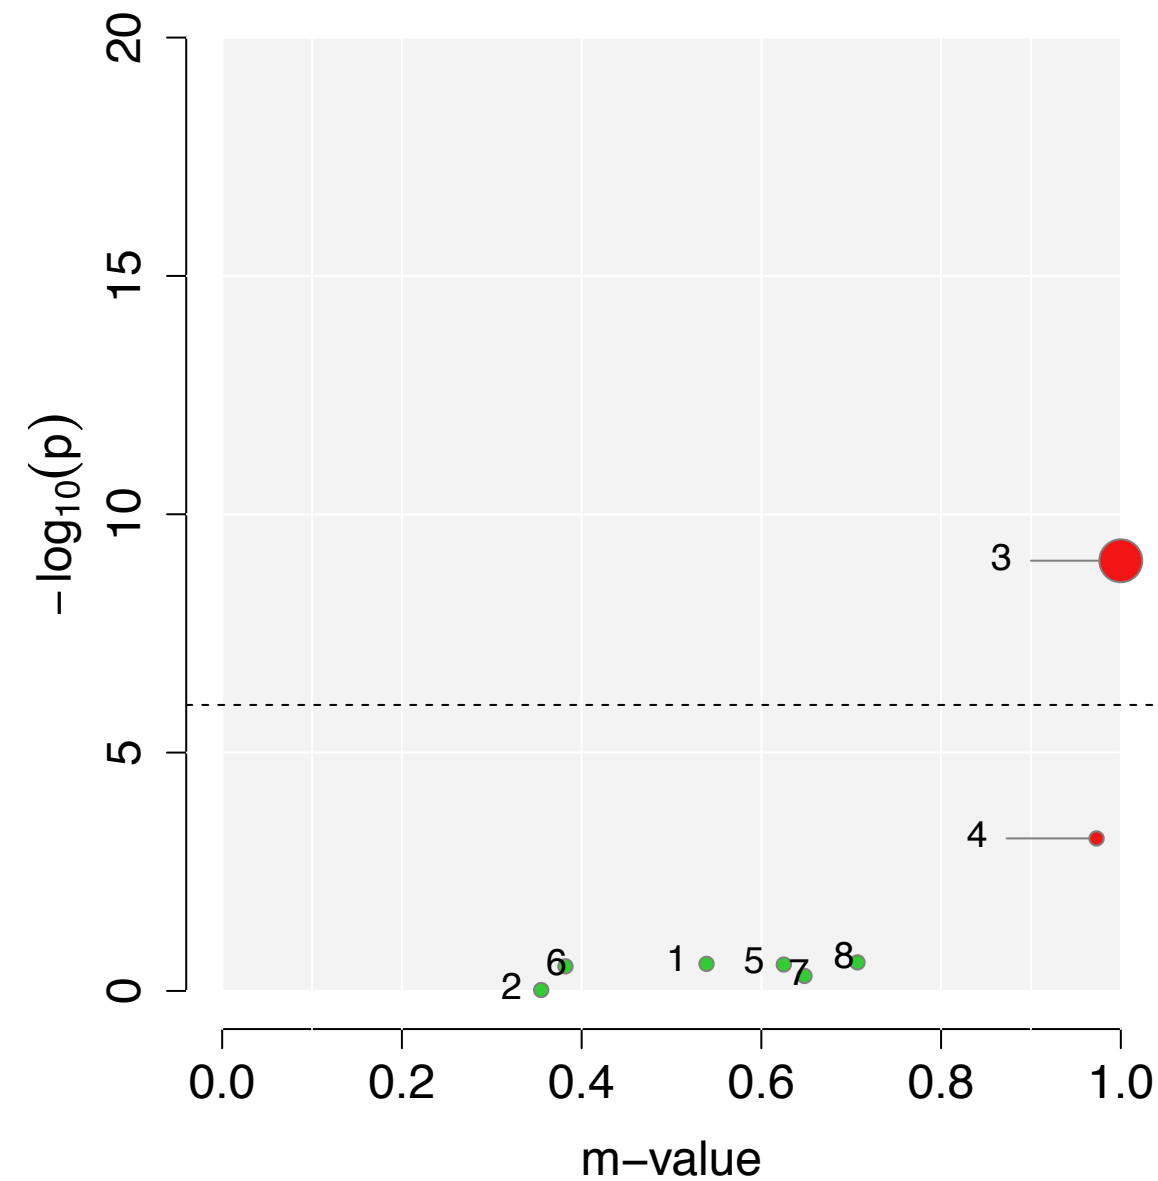

# rs1950829 (Meta $P = 2.27 \times 10^{-8}$ )

Gene : *LRFN5*

## GWAS P-value

- 0.3738 ● 1.SCZ
- 0.7806 ● 2.BIP
- $2.89 \times 10^{-9}$  ● 3.MD
- 0.2053 ● 4.ASD
- 0.3316 ● 5.ADHD
- 0.2093 ● 6.TS
- 0.0494 ● 7.ANO
- 0.3395 ● 8.OCD

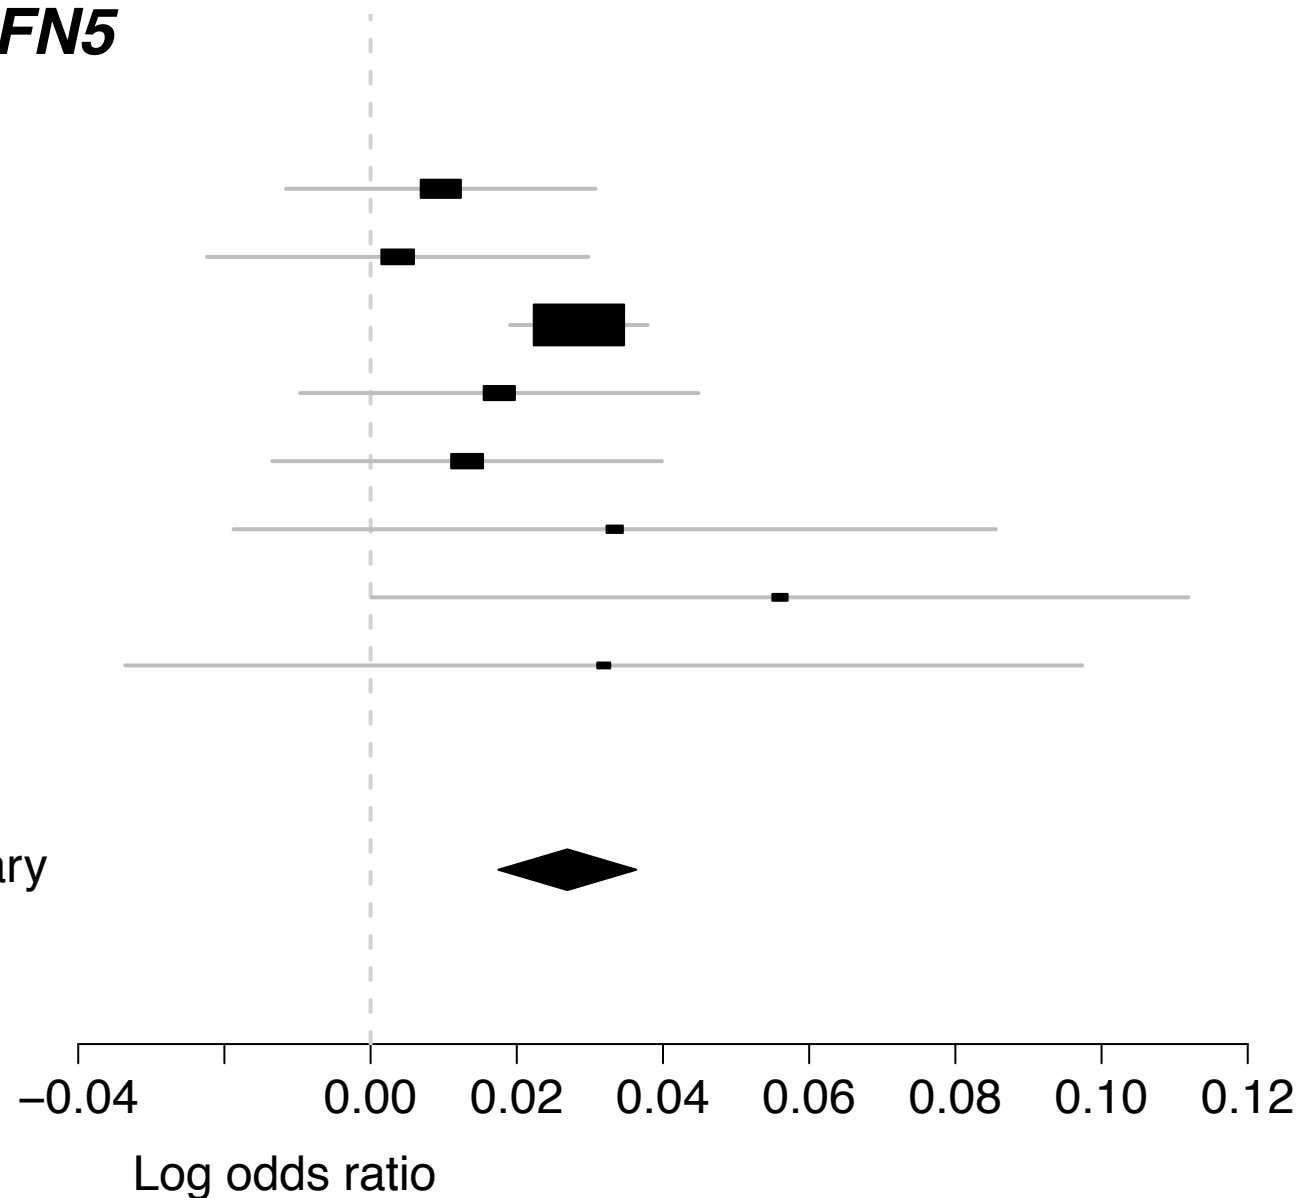

## PM-Plot

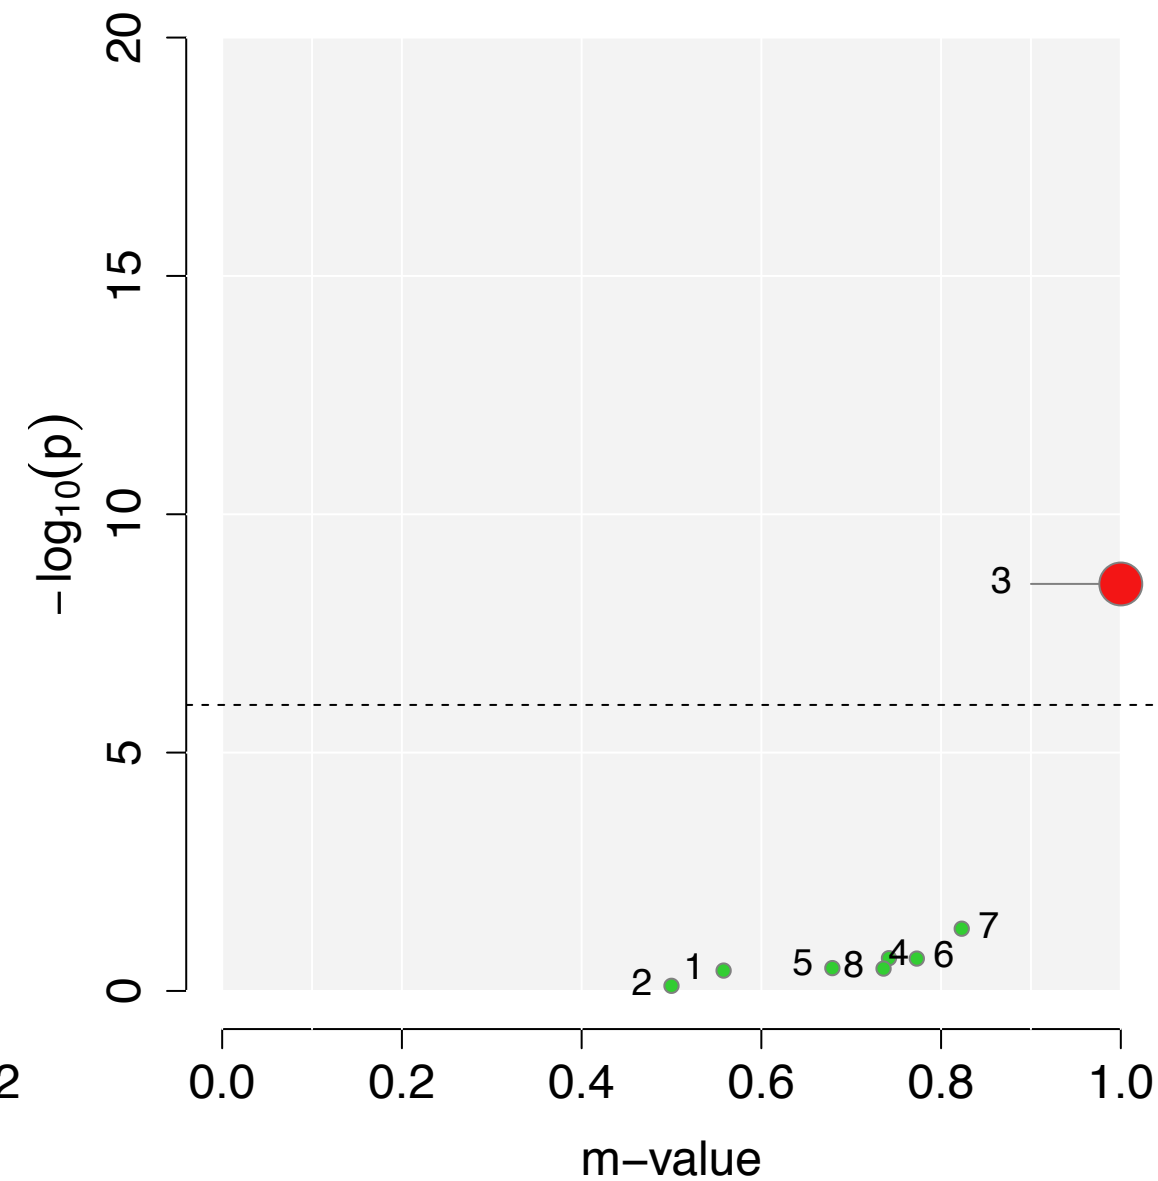

# rs2003490 (Meta $P = 1.56 \times 10^{-8}$ )

Gene : *RPS6KL1* , *DLST*

## GWAS P-value

- 0.0033 ● 1.SCZ
- 0.4137 ● 2.BIP
- $8.67 \times 10^{-9}$  ● 3.MD
- 0.8929 ● 4.ASD
- 0.2640 ● 5.ADHD
- 0.0661 ● 6.TS
- 0.9596 ● 7.ANO
- 0.4357 ● 8.OCD

FE summary

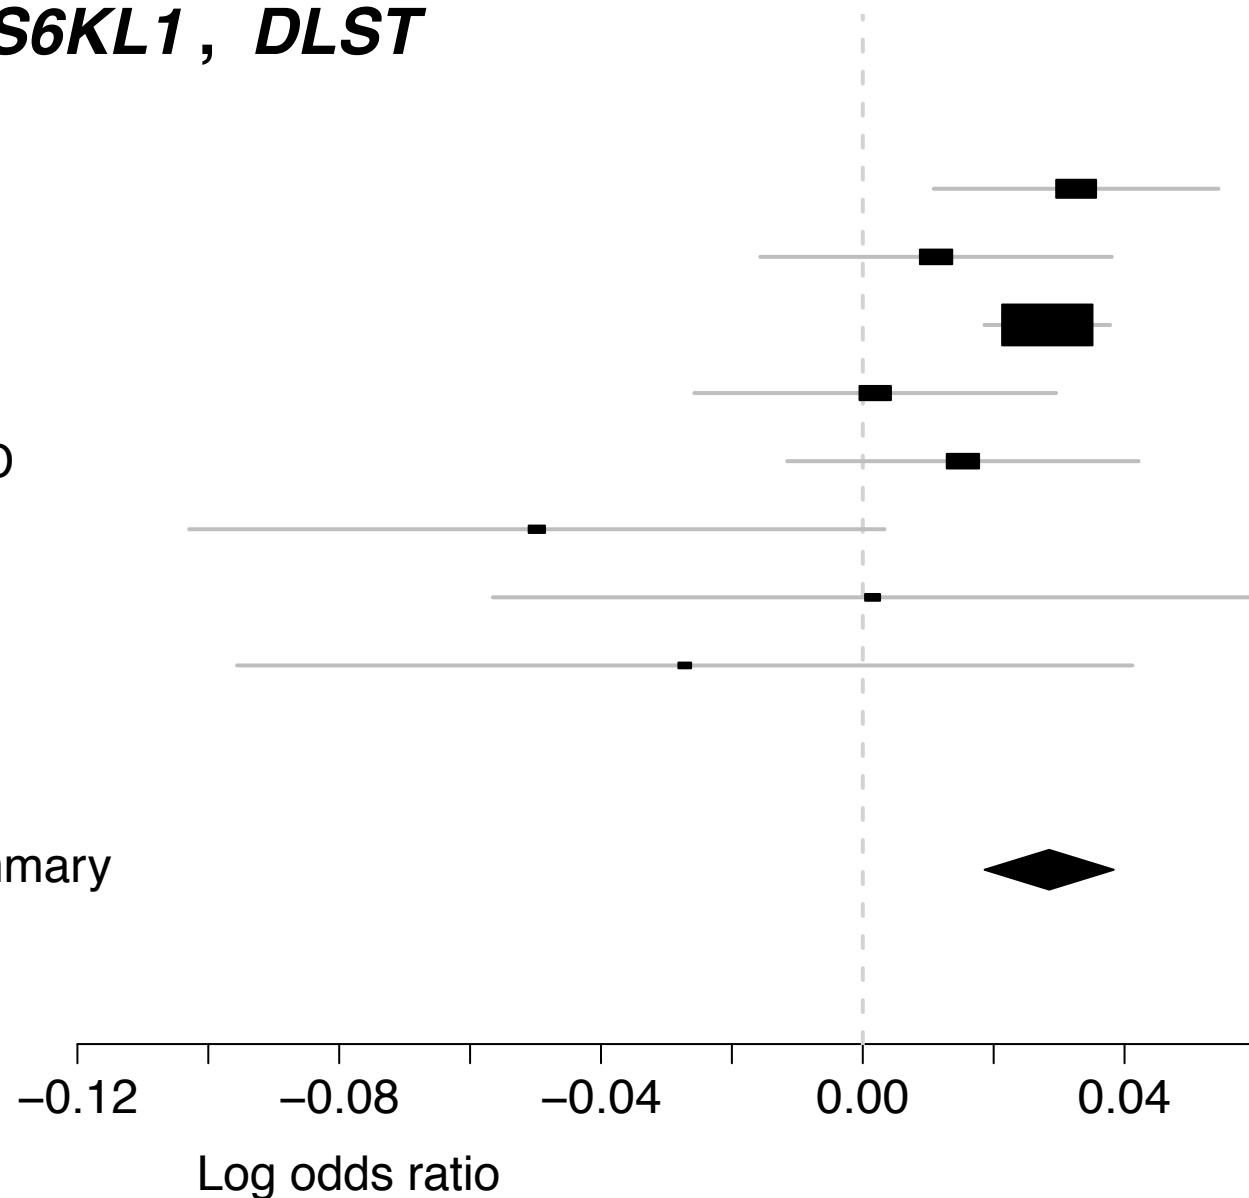

## PM-Plot

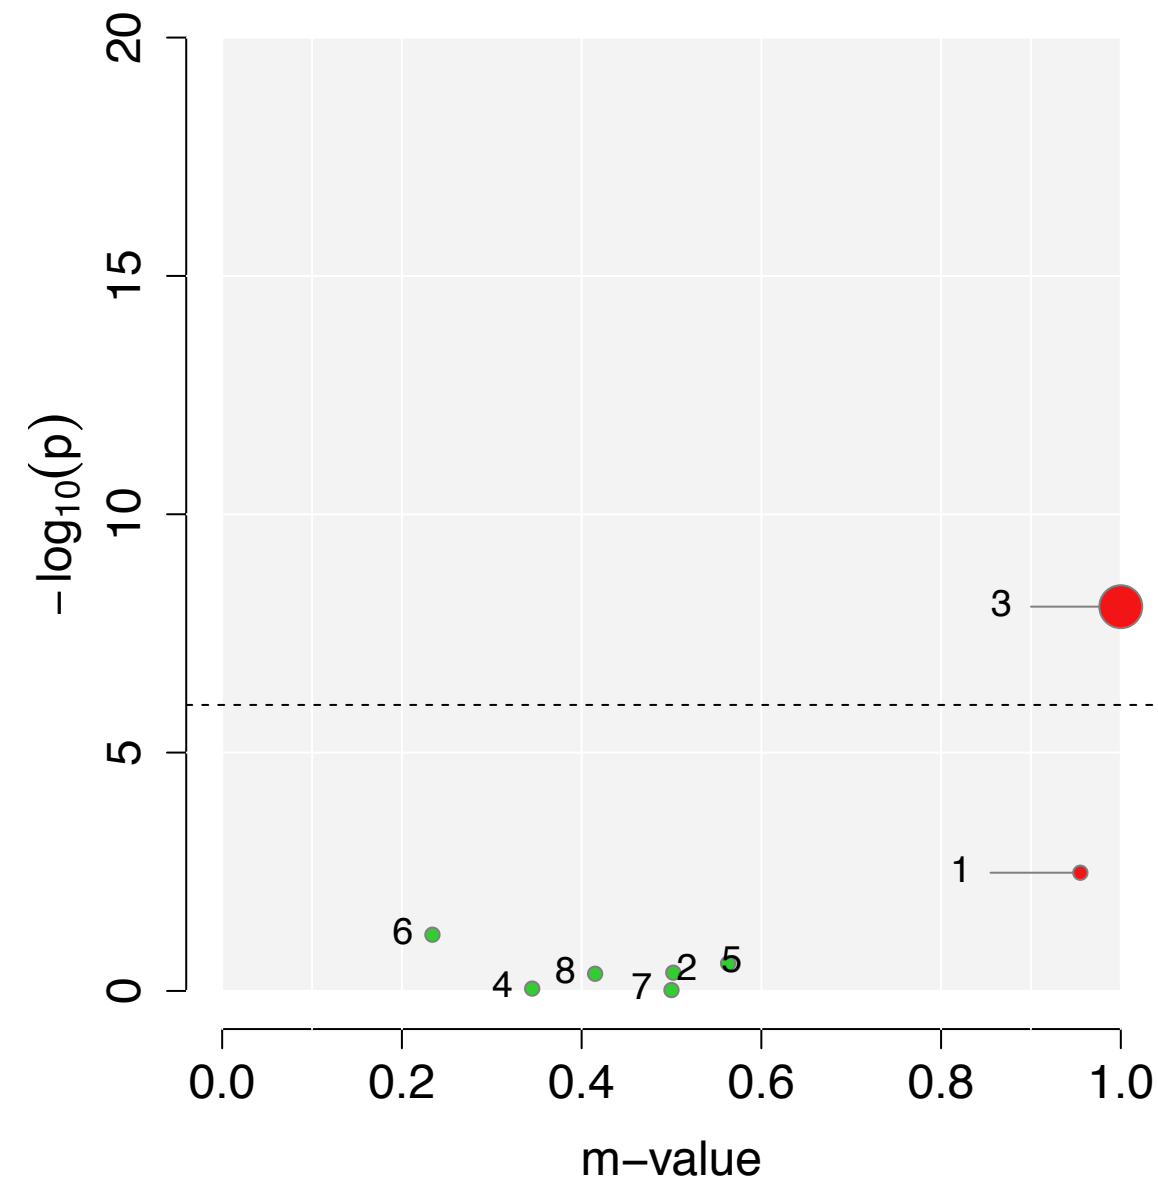

rs2047568 (Meta  $P = 4.3e \times 10^{-8}$ )

Gene : *SPPL3*, *ACADS*

GWAS P-value

- 0.0004 ● 1.SCZ
- 0.0044 ● 2.BIP
- $9.77 \times 10^{-7}$  ● 3.MD
- 0.3844 ● 4.ASD
- 0.4364 ● 5.ADHD
- 0.3731 ● 6.TS
- 0.4305 ● 7.ANO
- 0.6930 ● 8.OCD

FE summary

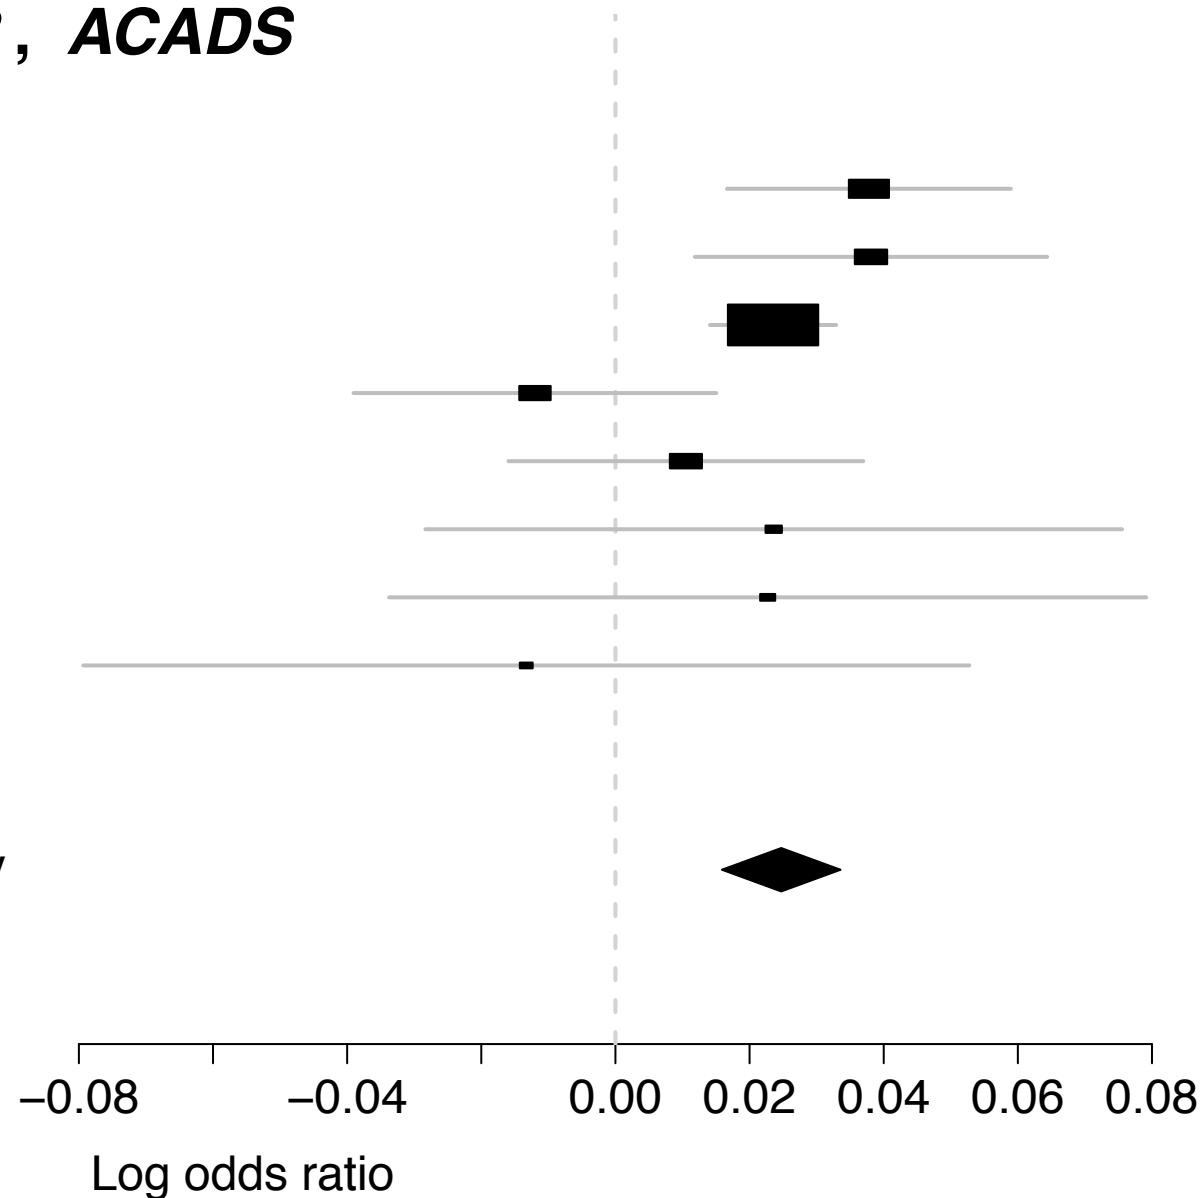

PM-Plot

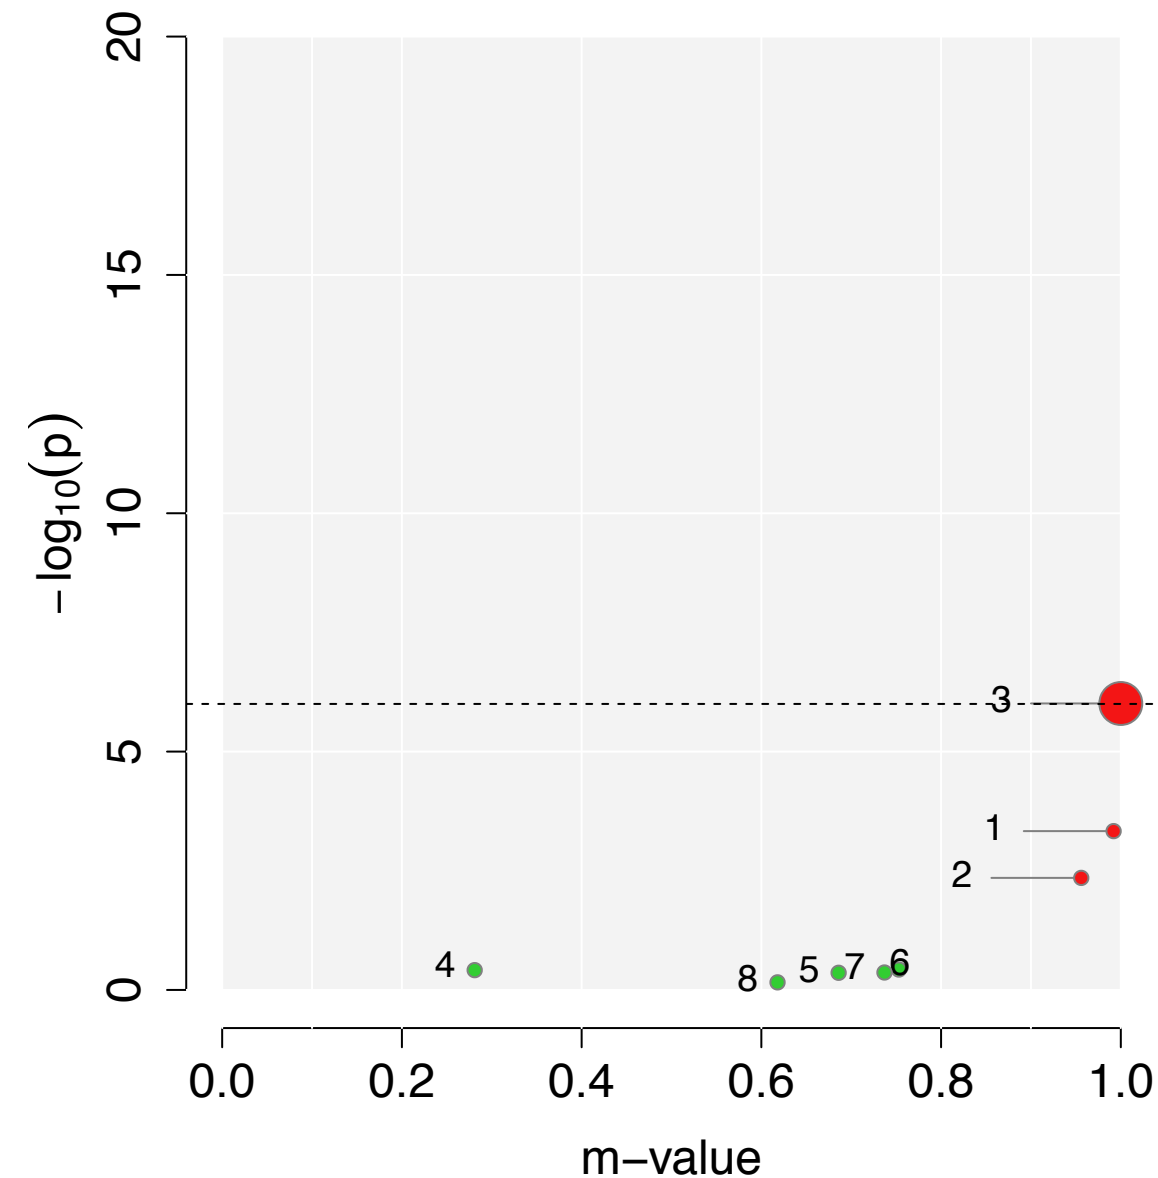

# rs2057884 (Meta $P = 3.68 \times 10^{-10}$ )

Gene : *SRPK2*

## GWAS P-value

- 1.86 x 10<sup>-9</sup> ● 1.SCZ
- 0.0674 ● 2.BIP
- 0.0138 ● 3.MD
- 0.0005 ● 4.ASD
- 0.0025 ● 5.ADHD
- 0.2443 ● 6.TS
- 0.7256 ● 7.ANO
- 0.7156 ● 8.OCD

FE summary

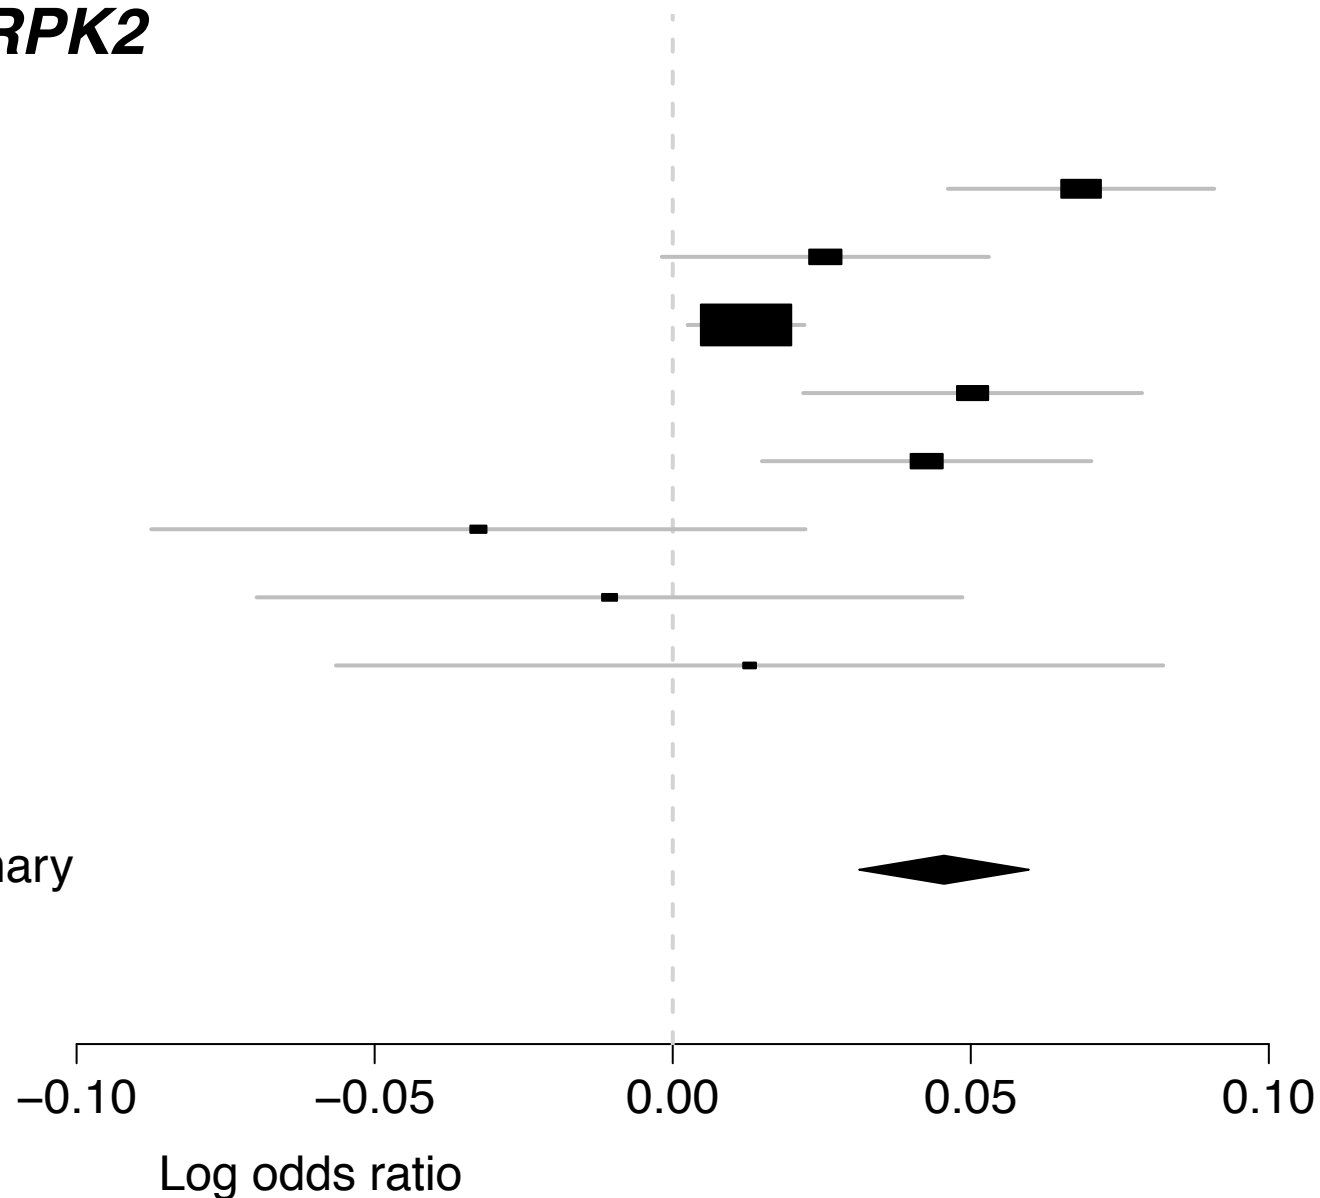

## PM-Plot

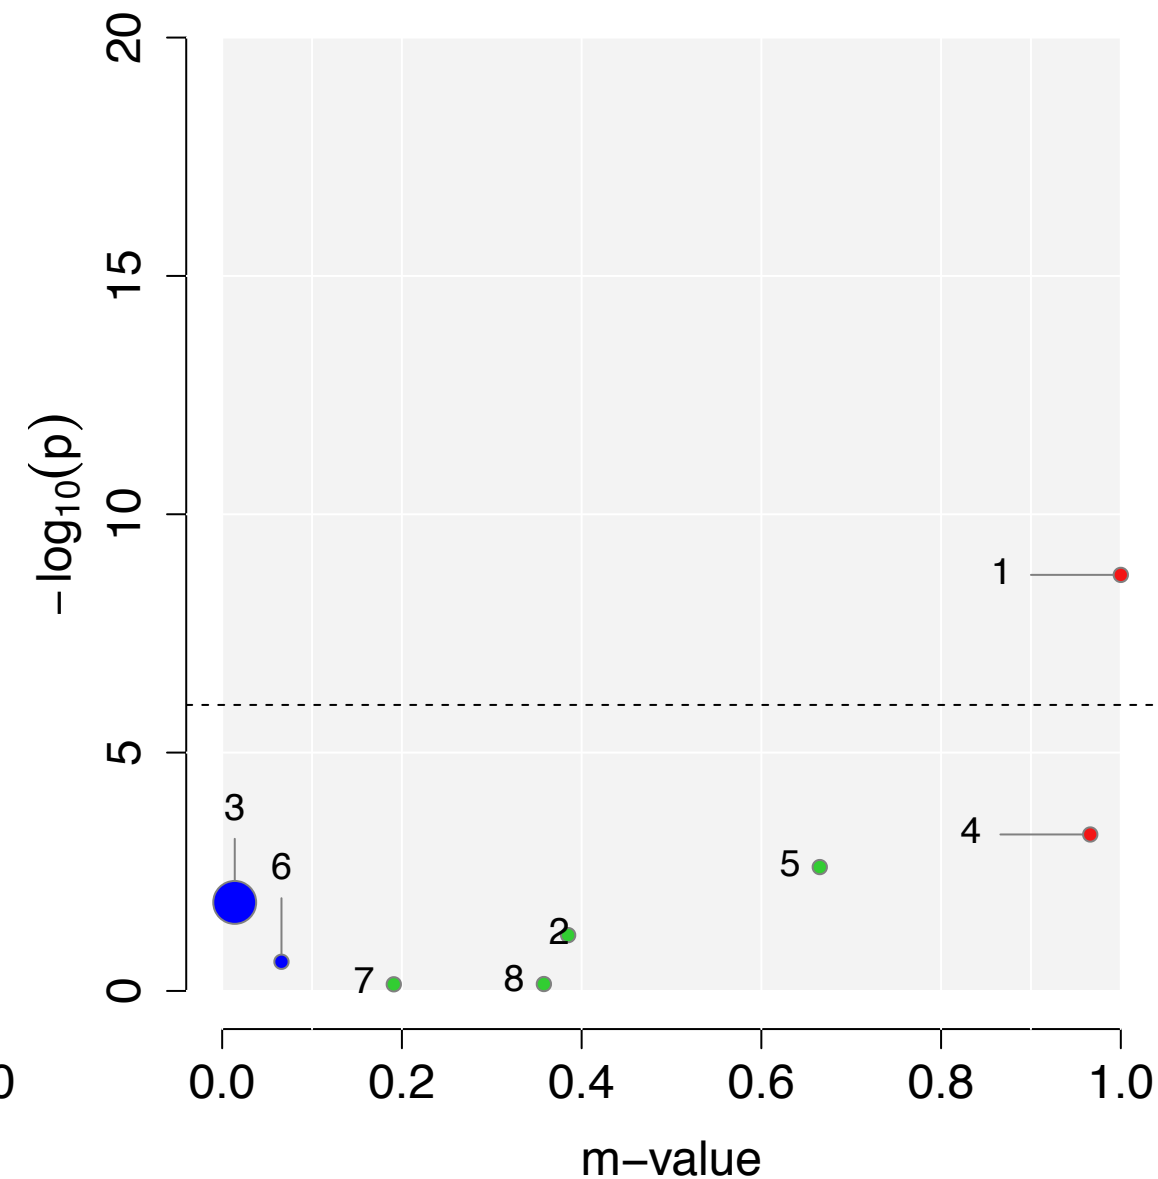

# rs2098651 (Meta $P = 7.06 \times 10^{-9}$ )

Gene : *TENM2*

## GWAS P-value

- 0.2245 ● 1.SCZ
- 0.0931 ● 2.BIP
- $9.75 \times 10^{-9}$  ● 3.MD
- 0.0164 ● 4.ASD
- 0.0025 ● 5.ADHD
- 0.1457 ● 6.TS
- 0.4392 ● 7.ANO
- 0.1313 ● 8.OCD

FE summary

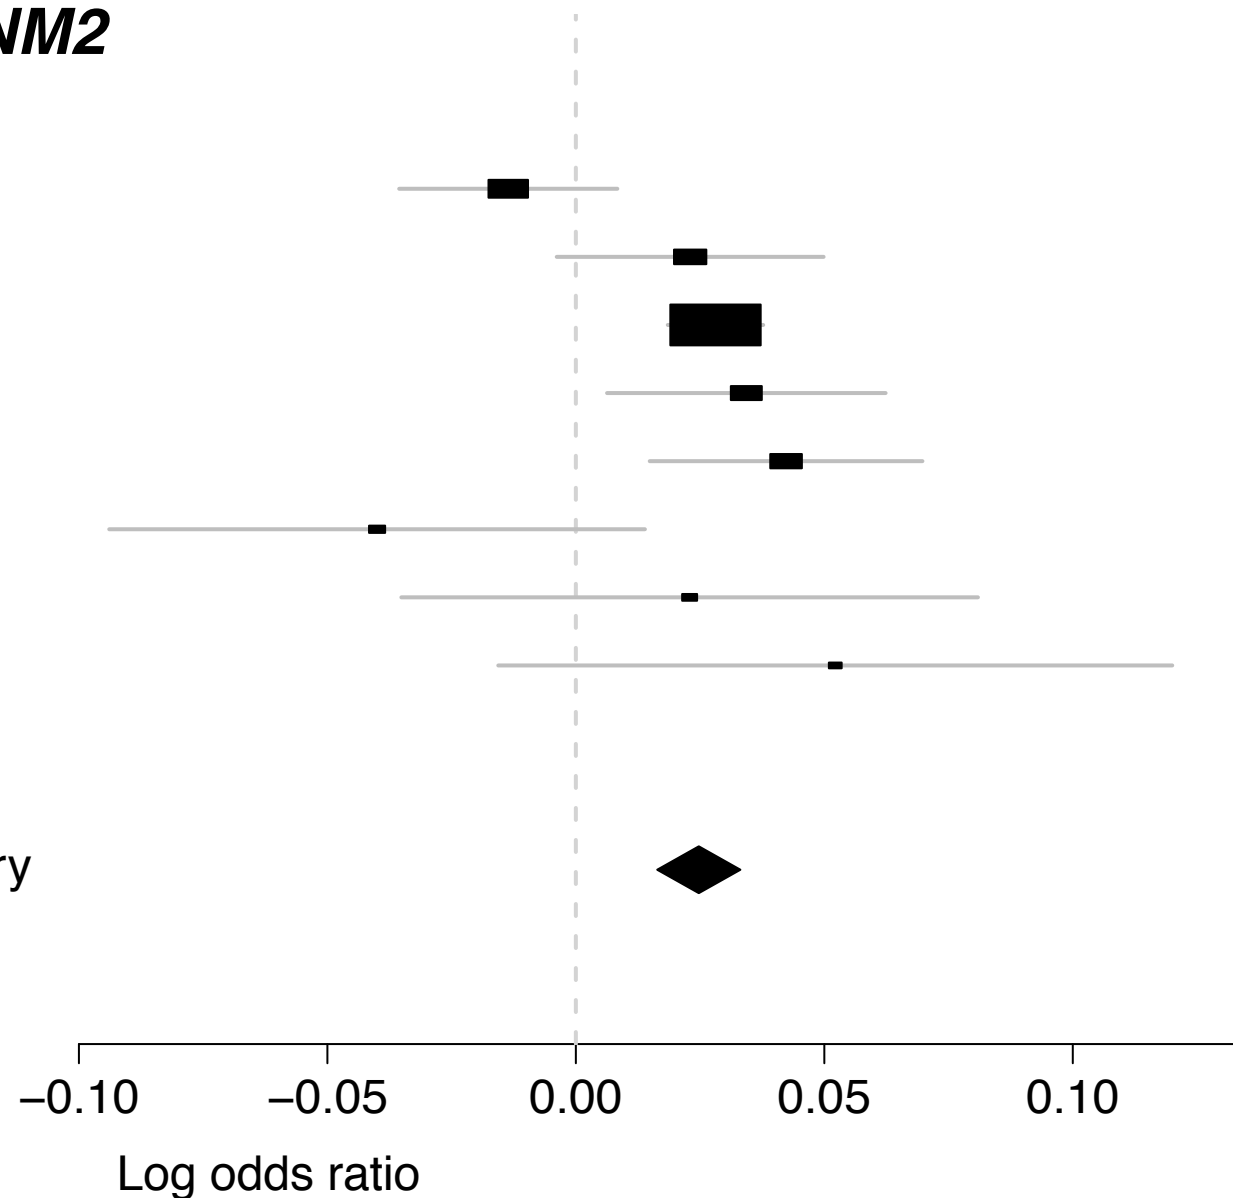

## PM-Plot

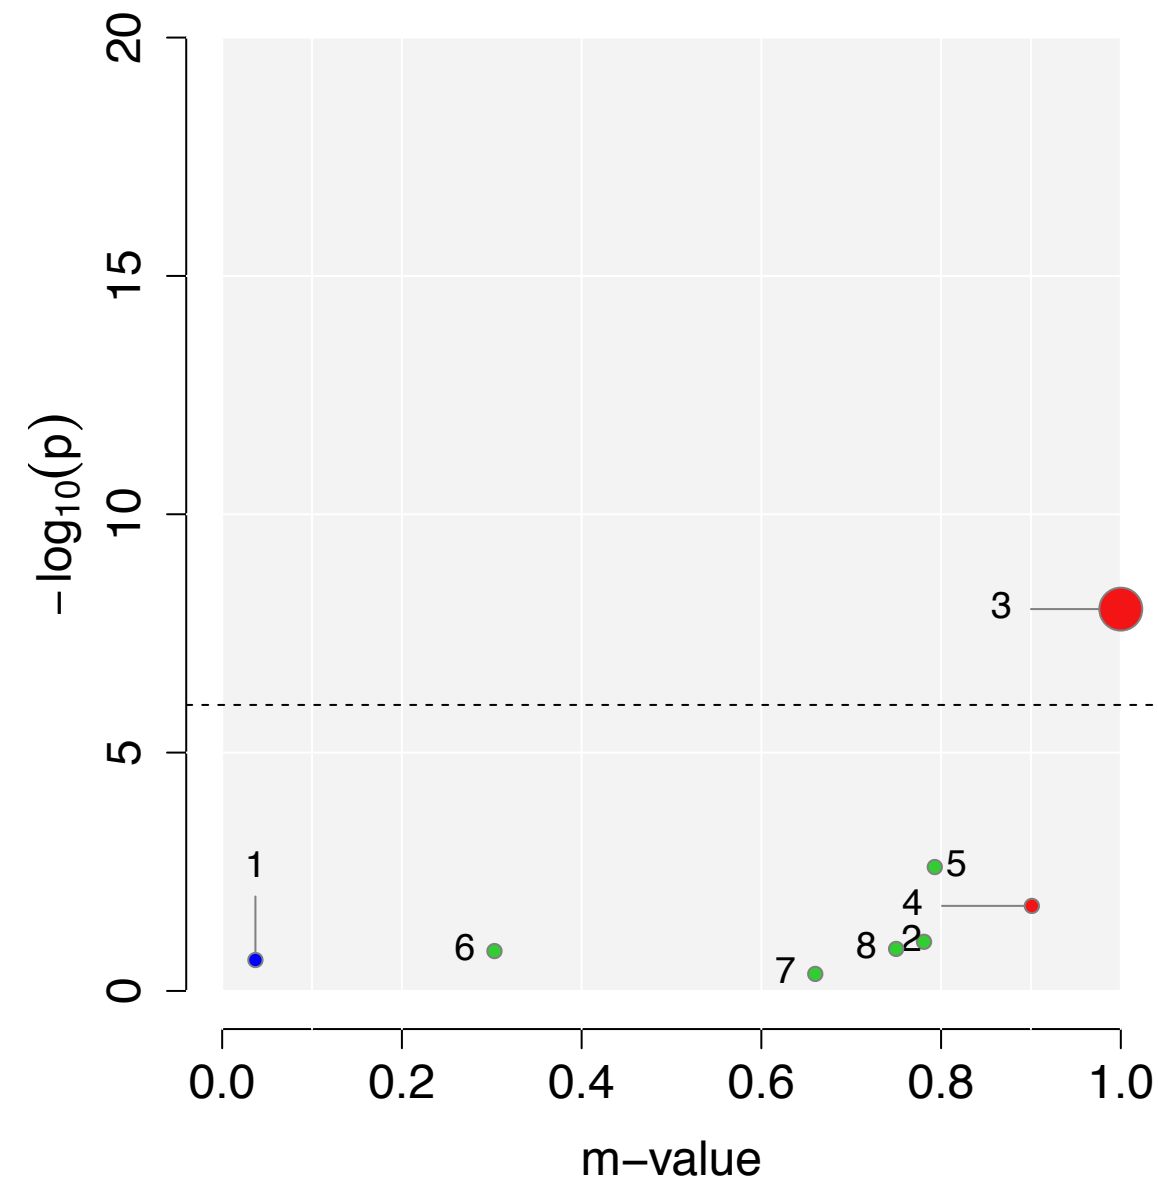

# rs2103655 (Meta $P = 1.07 \times 10^{-9}$ )

Gene : *PPP1R16B*, *ACTR5*

## GWAS P-value

- 1.21 x 10<sup>-10</sup> ● 1.SCZ
- 0.0806 ● 2.BIP
- 0.1127 ● 3.MD
- 0.9475 ● 4.ASD
- 0.2736 ● 5.ADHD
- 0.6443 ● 6.TS
- 0.8812 ● 7.ANO
- 0.0189 ● 8.OCD

FE summary

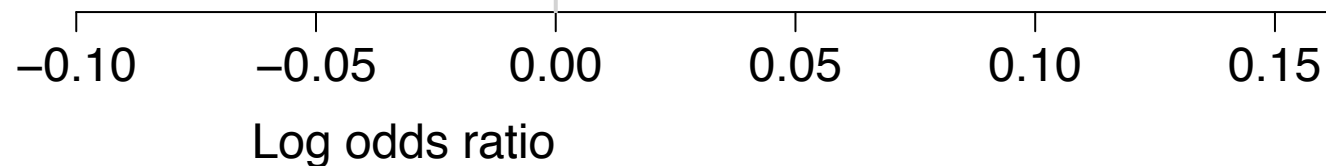

## PM-Plot

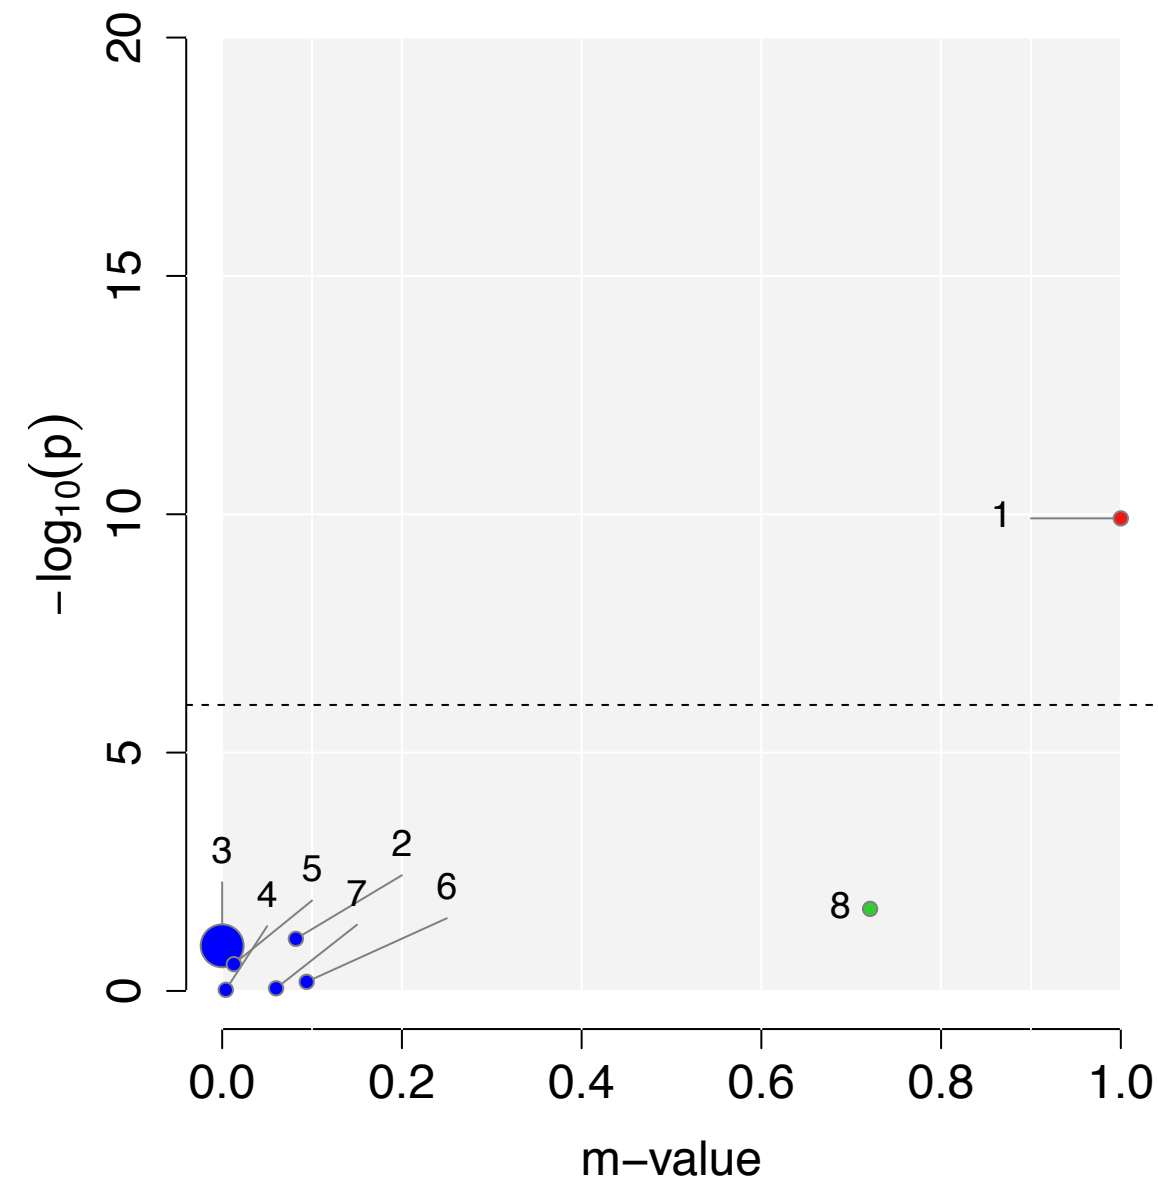

# rs2300861 (Meta $P = 8.39 \times 10^{-9}$ )

Gene : *AKAP6*

## GWAS P-value

- 1.14 x 10<sup>-5</sup> ● 1.SCZ
- 0.0779 ● 2.BIP
- 0.4911 ● 3.MD
- 0.3421 ● 4.ASD
- 9.65 x 10<sup>-6</sup> ● 5.ADHD
- 0.0060 ● 6.TS
- 0.0547 ● 7.ANO
- 0.4607 ● 8.OCD

FE summary

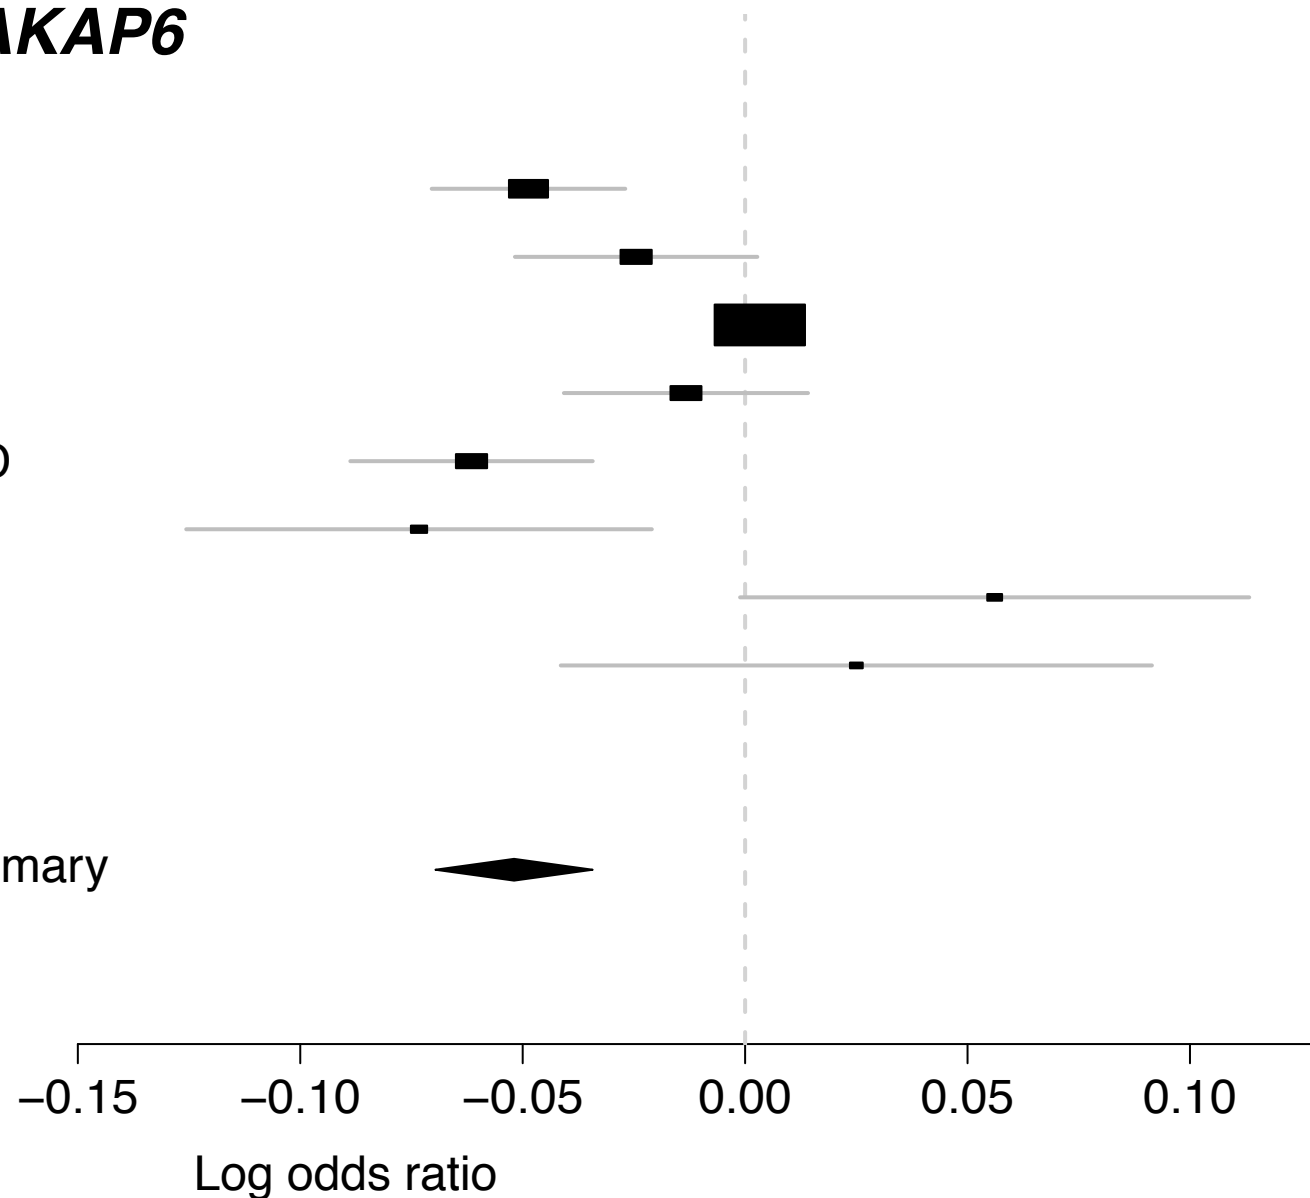

## PM-Plot

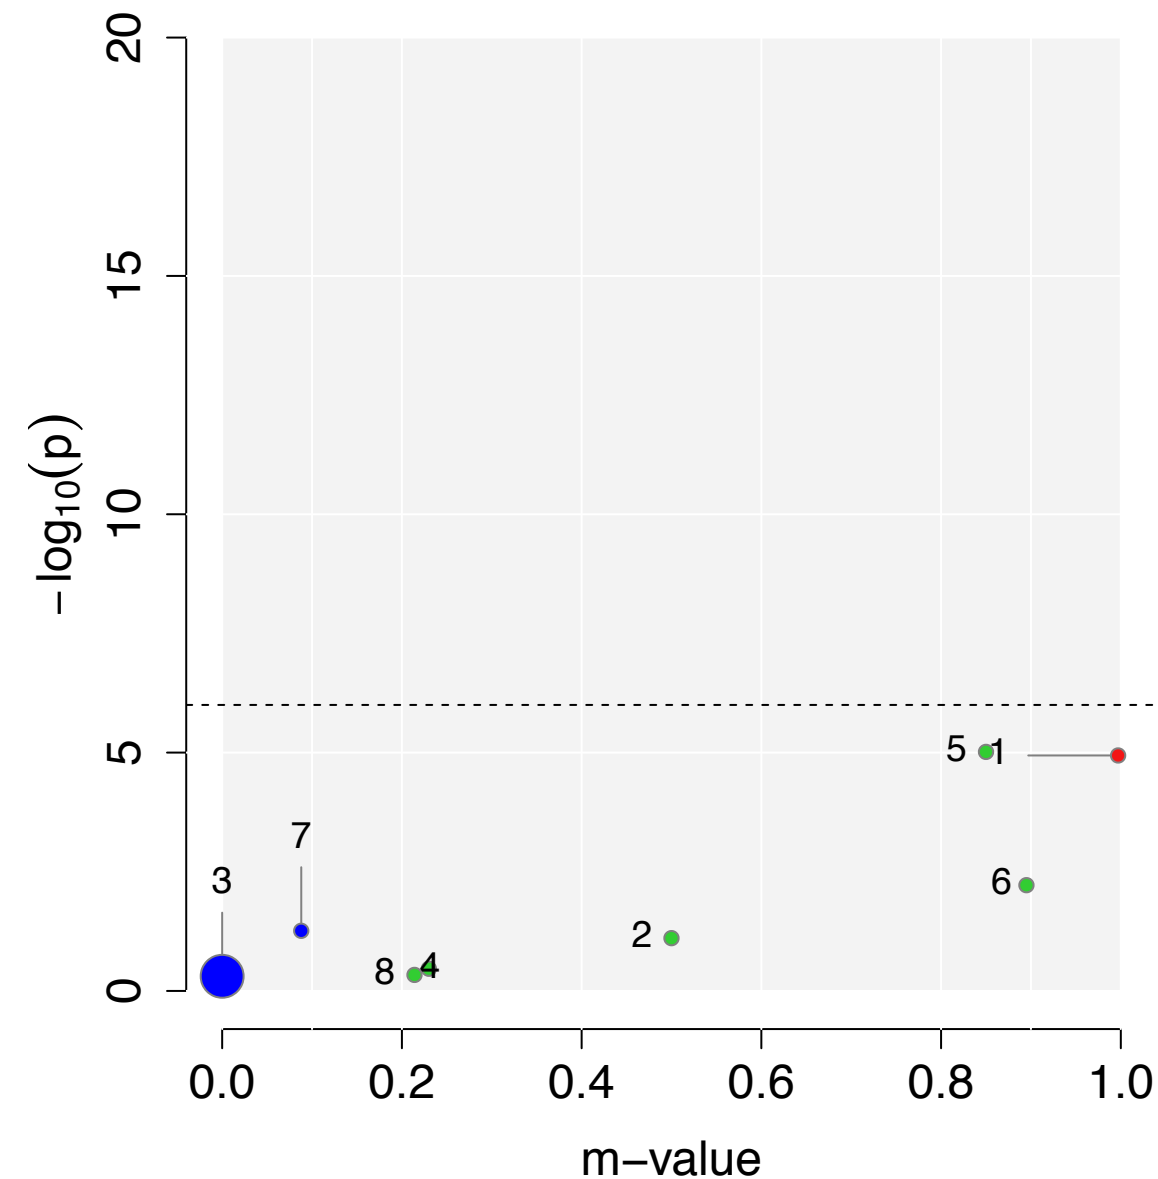



# rs2332700 (Meta $P = 4.5e \times 10^{-10}$ )

Gene : *RGS6*

## GWAS P-value

- 6.91 x 10<sup>-10</sup> ● 1.SCZ
- 0.0360 ● 2.BIP
- 7.37 x 10<sup>-6</sup> ● 3.MD
- 0.0329 ● 4.ASD
- 0.9031 ● 5.ADHD
- 0.6487 ● 6.TS
- 0.1897 ● 7.ANO
- 0.1956 ● 8.OCD

FE summary

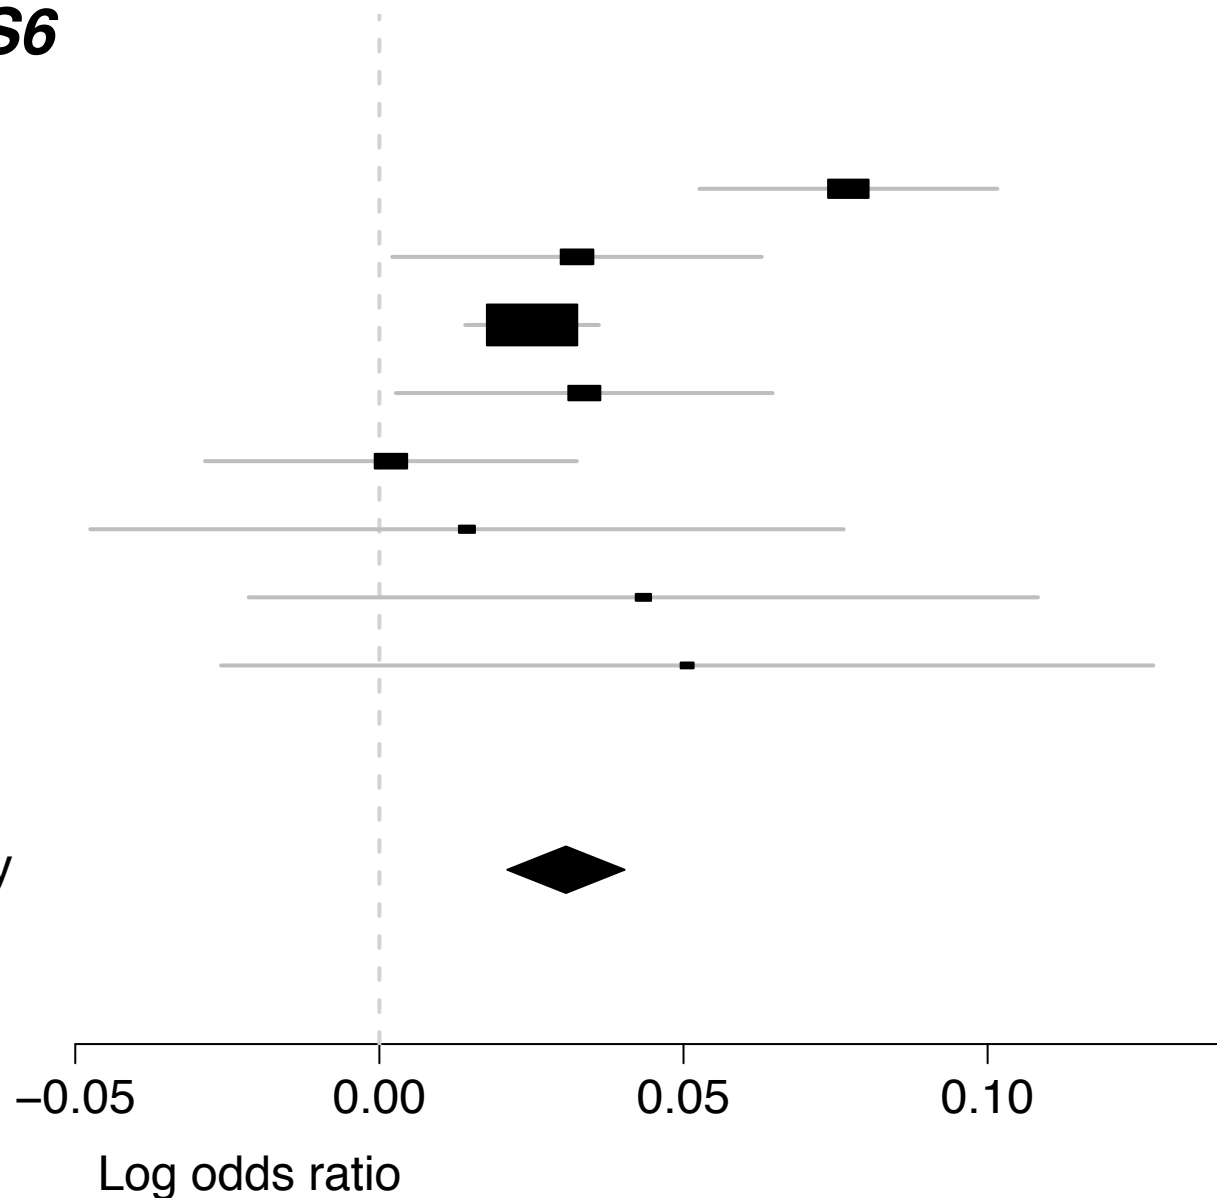

## PM-Plot

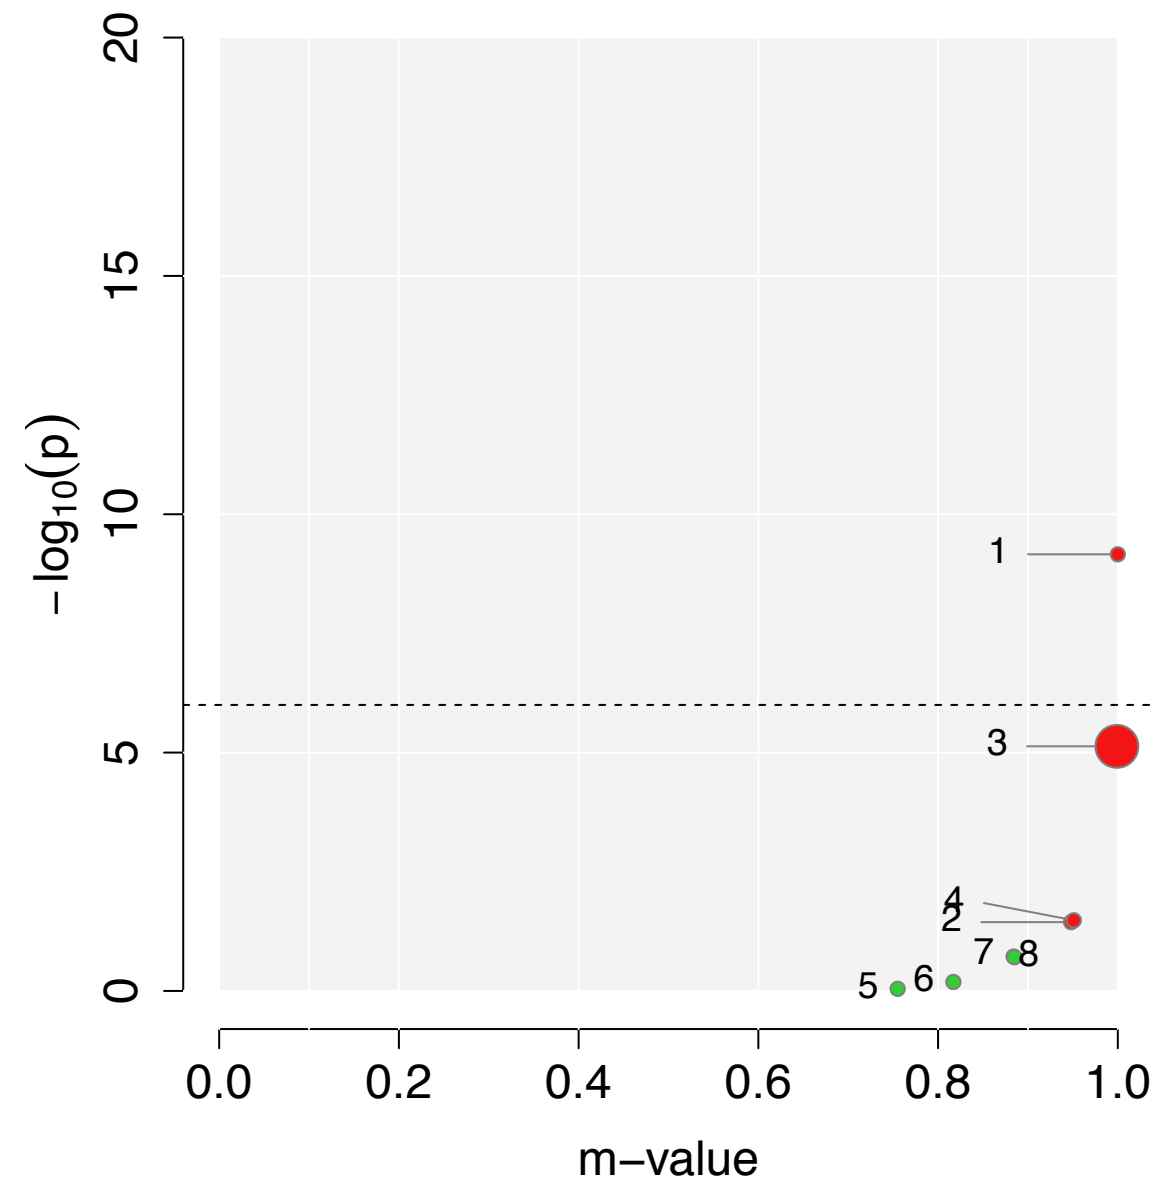

# rs2388334 (Meta $P = 1.48 \times 10^{-11}$ )

Gene : (>200kb)

## GWAS P-value

- 0.0025 ● 1.SCZ
- $8.27 \times 10^{-8}$  ● 2.BIP
- 0.3378 ● 3.MD
- $9.30 \times 10^{-7}$  ● 4.ASD
- 0.6250 ● 5.ADHD
- $9.51 \times 10^{-5}$  ● 6.TS
- 0.0553 ● 7.ANO
- 0.2511 ● 8.OCD

FE summary

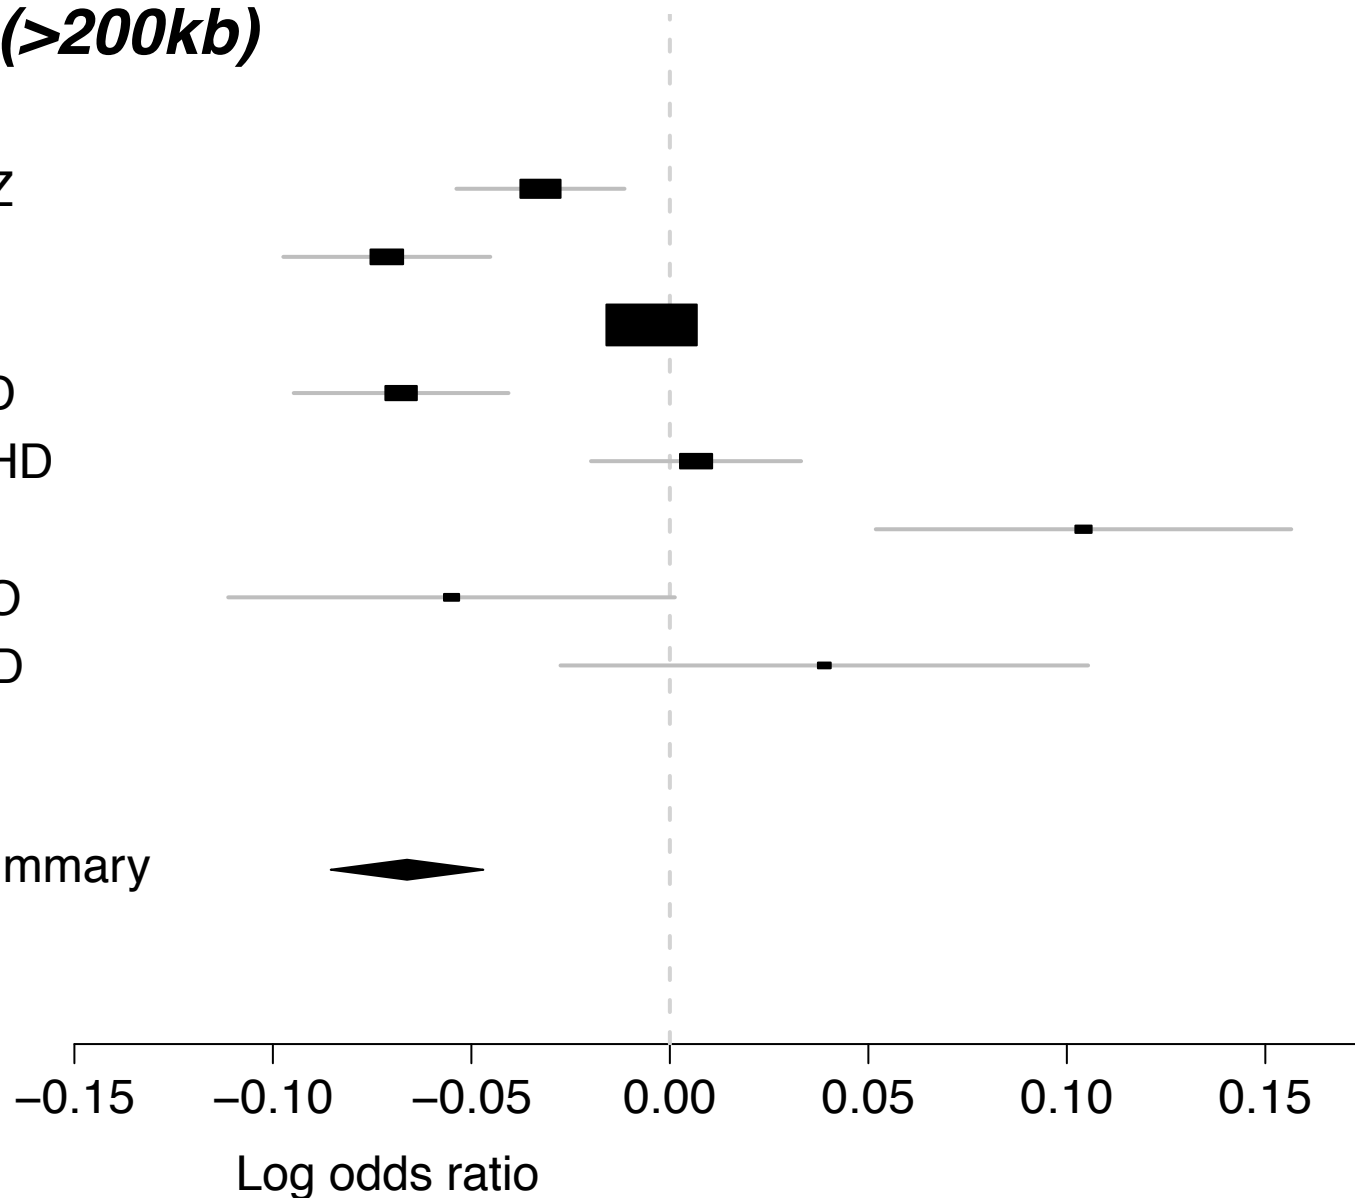

## PM-Plot

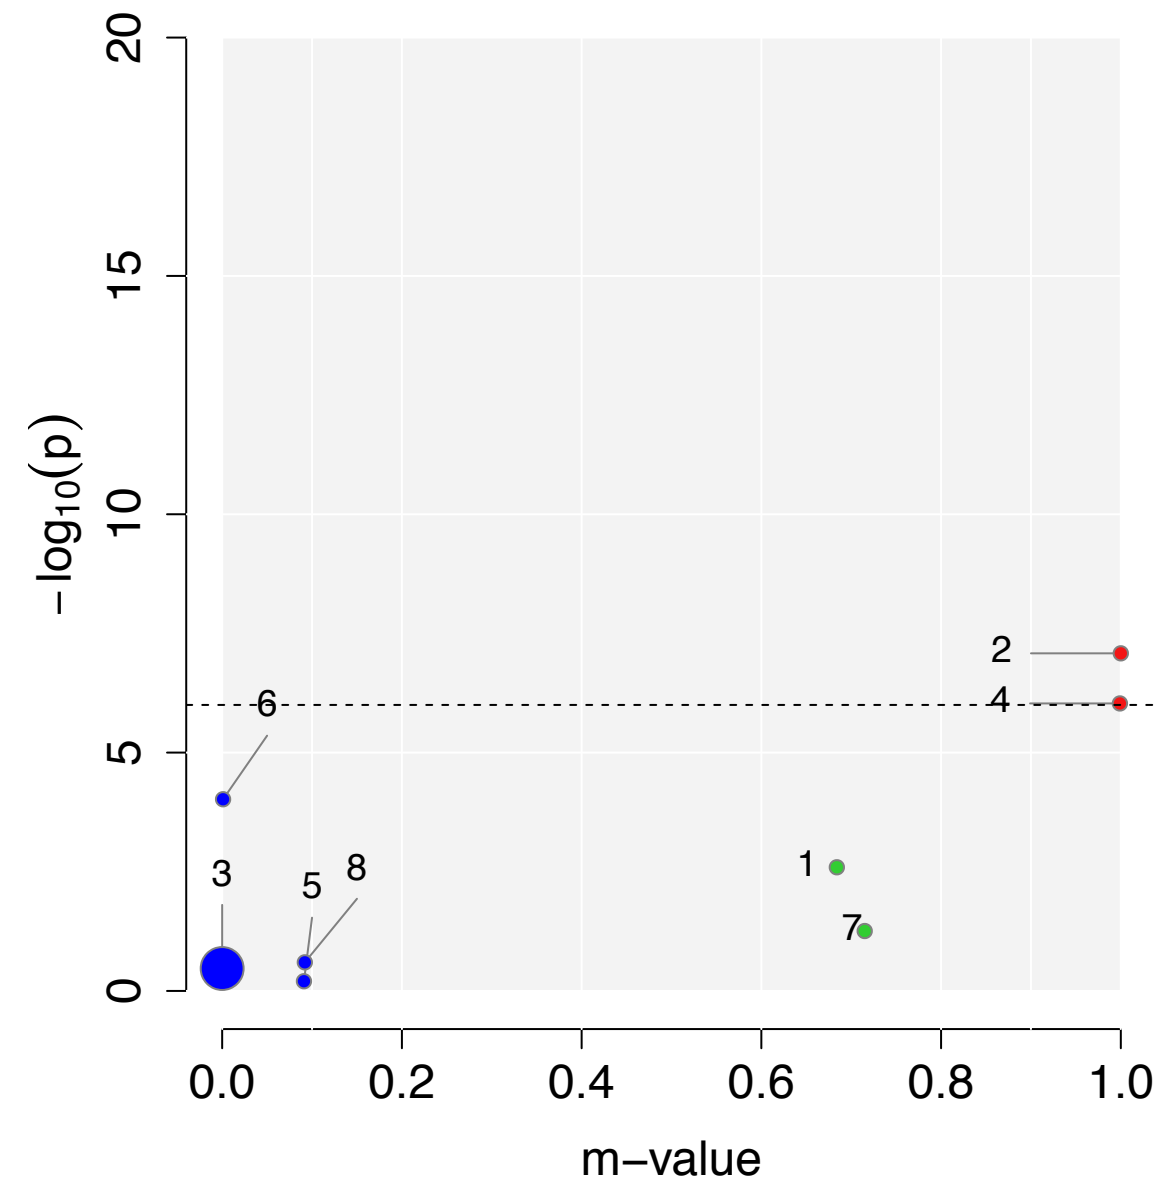

# rs2391734 (Meta $P = 1.5e \times 10^{-8}$ )

Gene : (>200kb)

## GWAS P-value

- 0.6114 ● 1.SCZ
- 0.3238 ● 2.BIP
- 0.0885 ● 3.MD
- $3.87 \times 10^{-7}$  ● 4.ASD
- $6.80 \times 10^{-8}$  ● 5.ADHD
- 0.0641 ● 6.TS
- 0.7727 ● 7.ANO
- 0.7565 ● 8.OCD

FE summary

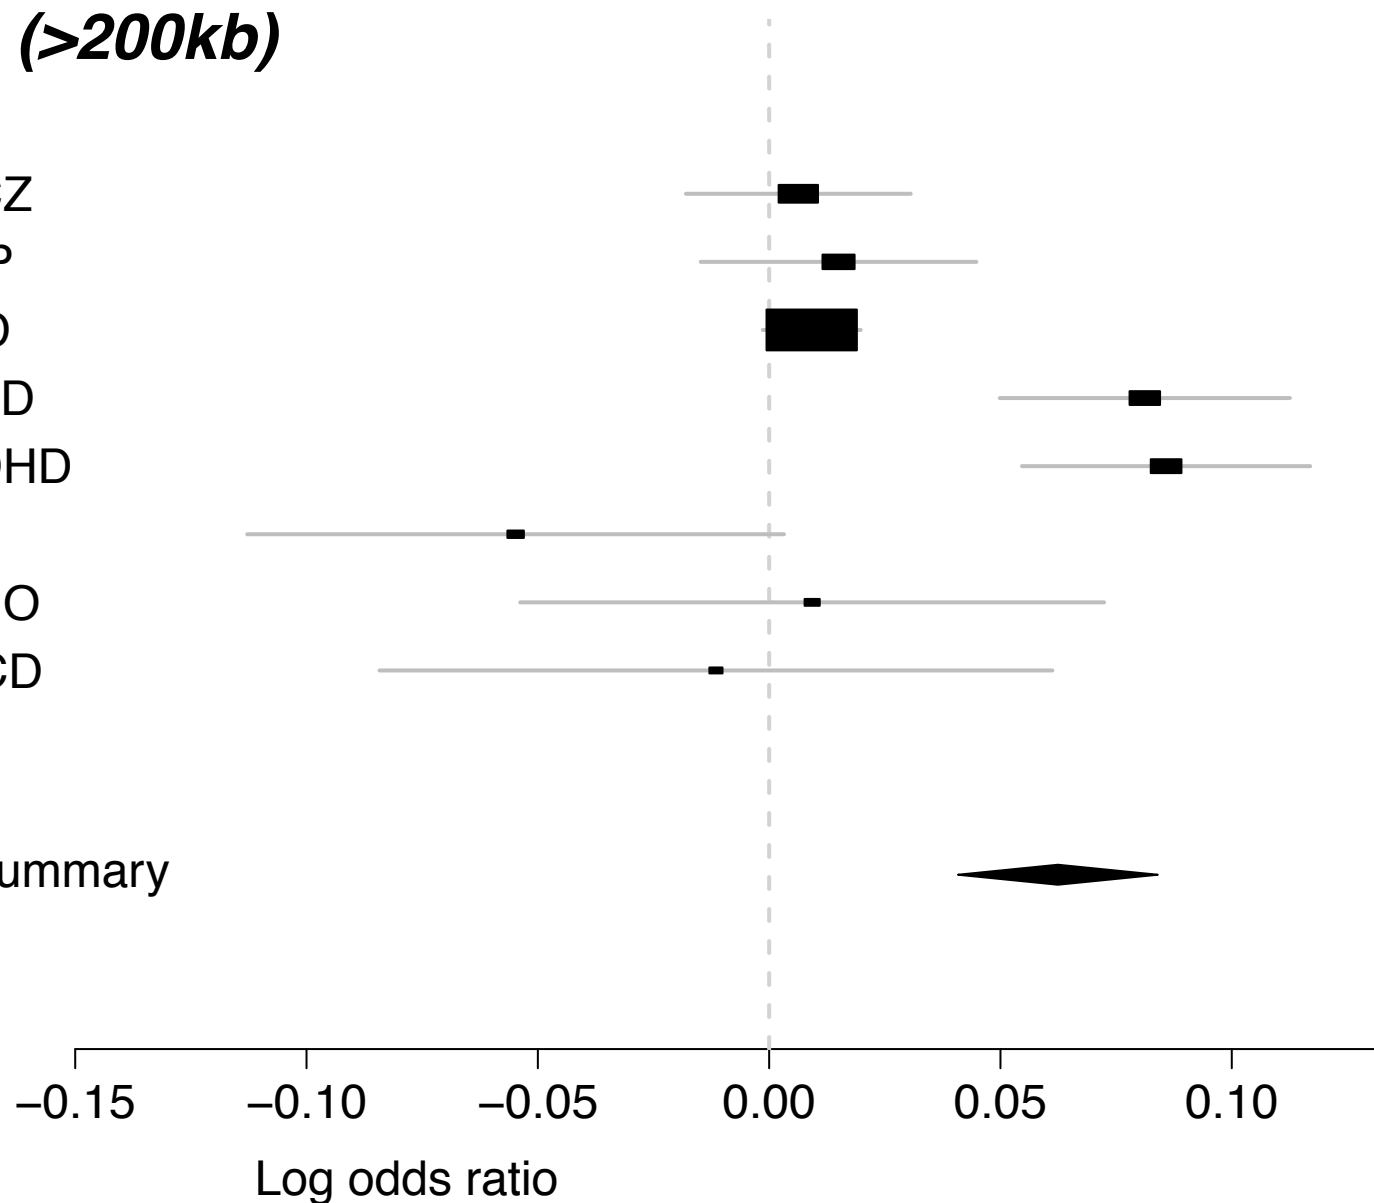

## PM-Plot

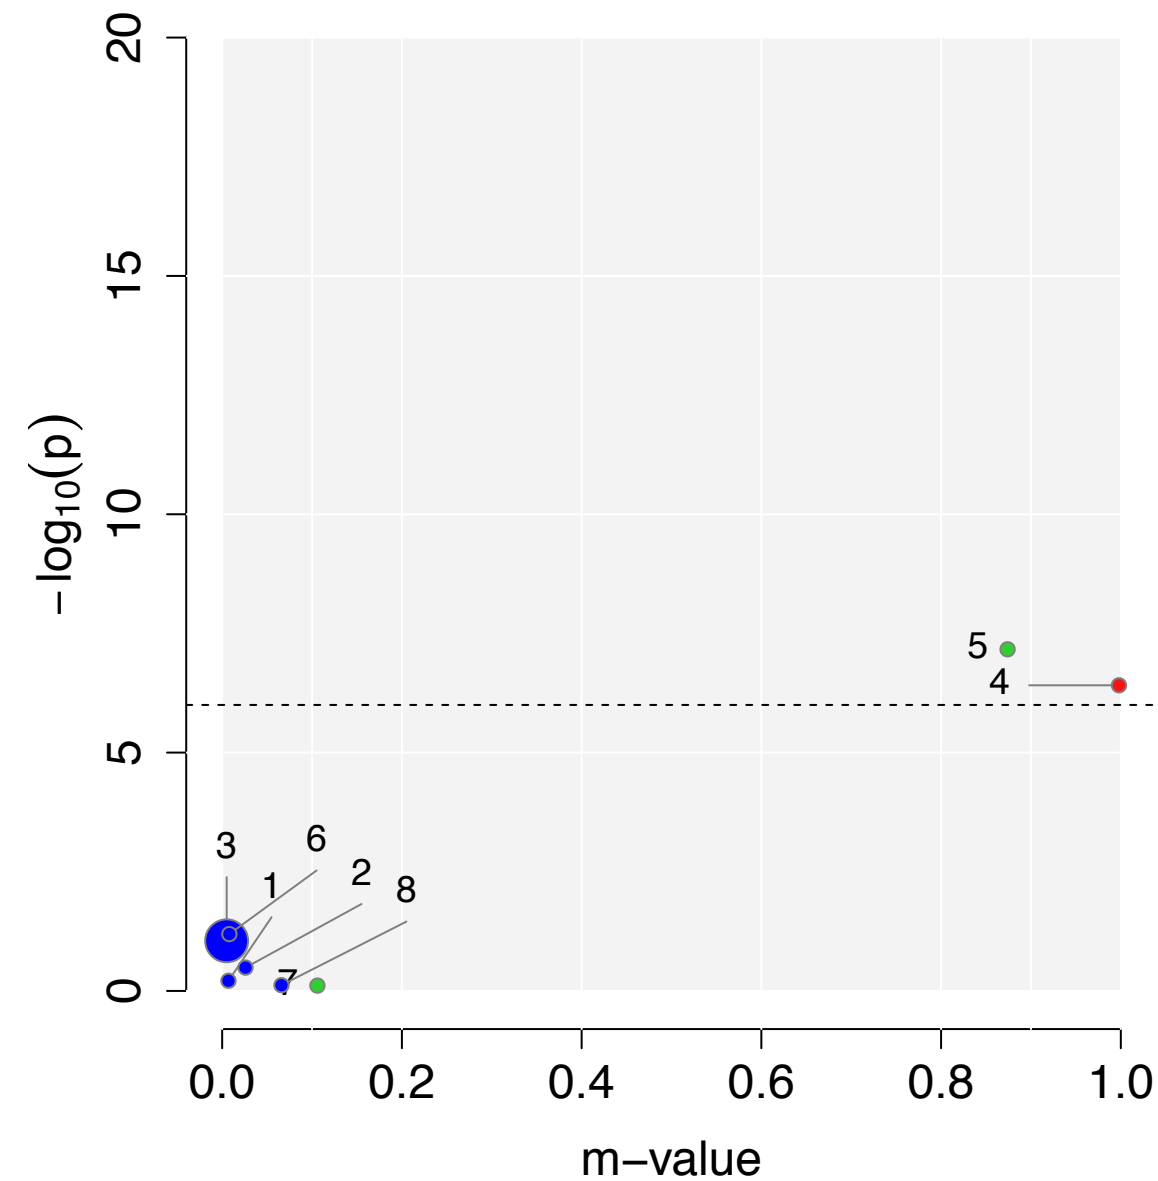

# rs2391769 (Meta $P = 8.23 \times 10^{-9}$ )

Gene : (>200kb)

## GWAS P-value

- 0.4464 ● 1.SCZ
- 0.2938 ● 2.BIP
- 0.8572 ● 3.MD
- $1.13 \times 10^{-7}$  ● 4.ASD
- $9.50 \times 10^{-8}$  ● 5.ADHD
- 0.8253 ● 6.TS
- 0.4295 ● 7.ANO
- 0.6369 ● 8.OCD

FE summary

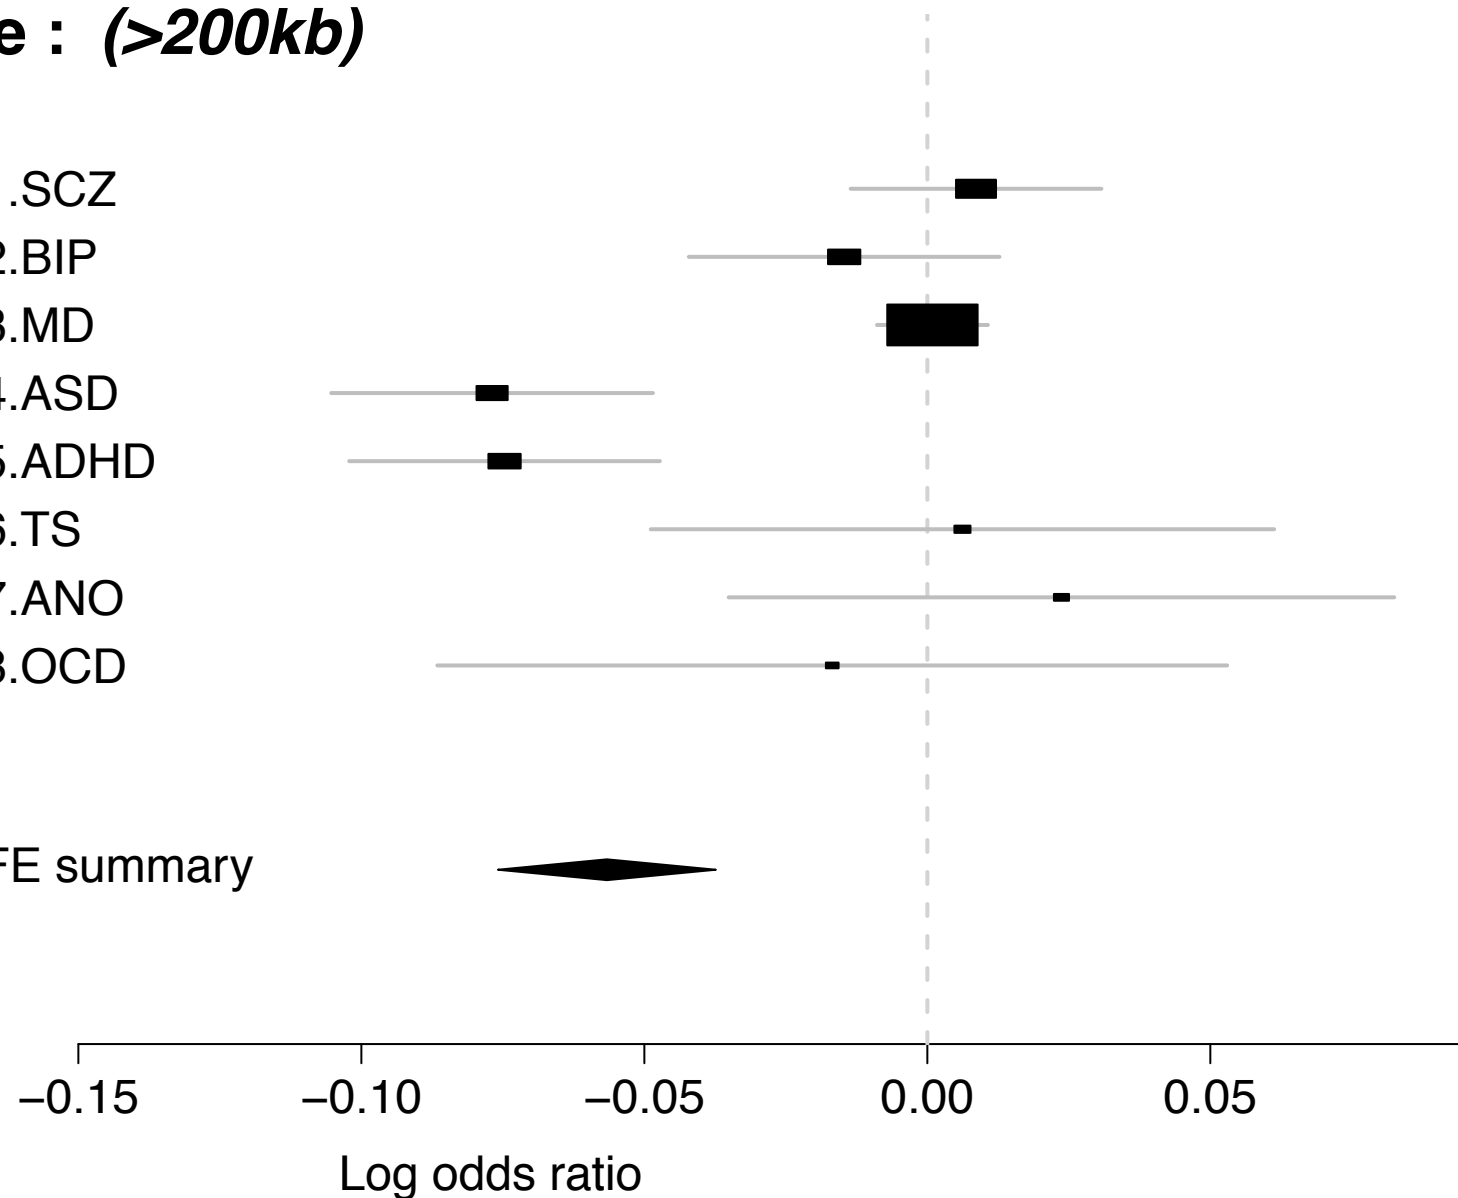

## PM-Plot

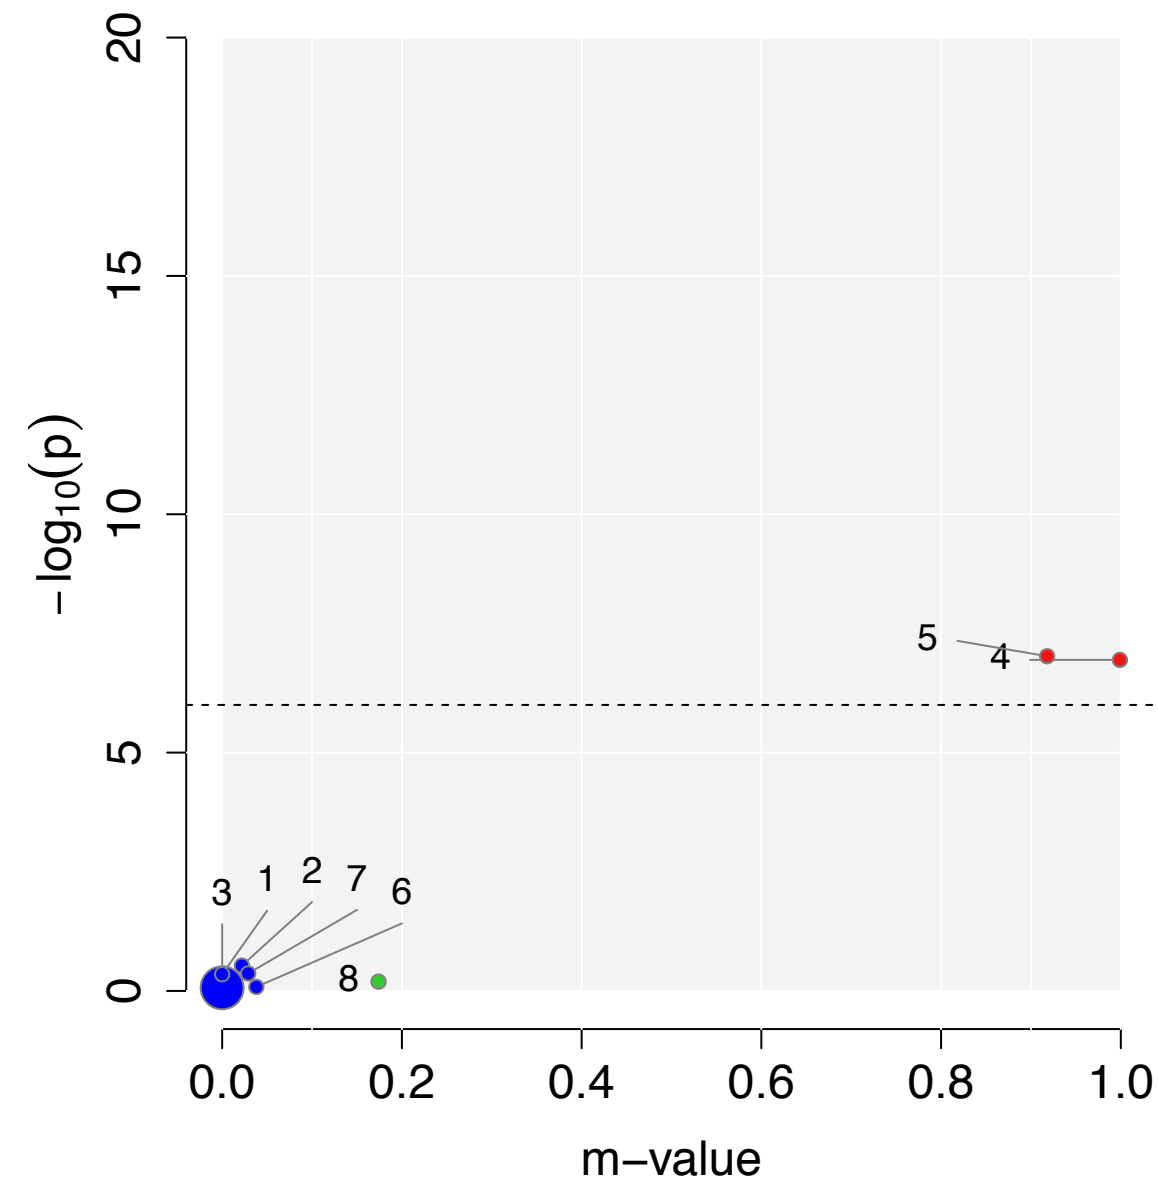

# rs2414718 (Meta $P = 1.36 \times 10^{-8}$ )

Gene : (>200kb)

## GWAS P-value

$2.22 \times 10^{-10}$

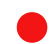

1.SCZ

0.0087

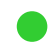

2.BIP

0.5821

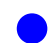

3.MD

0.8412

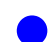

4.ASD

0.0065

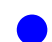

5.ADHD

0.1321

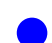

6.TS

0.7076

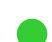

7.ANO

0.1895

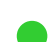

8.OCD

FE summary

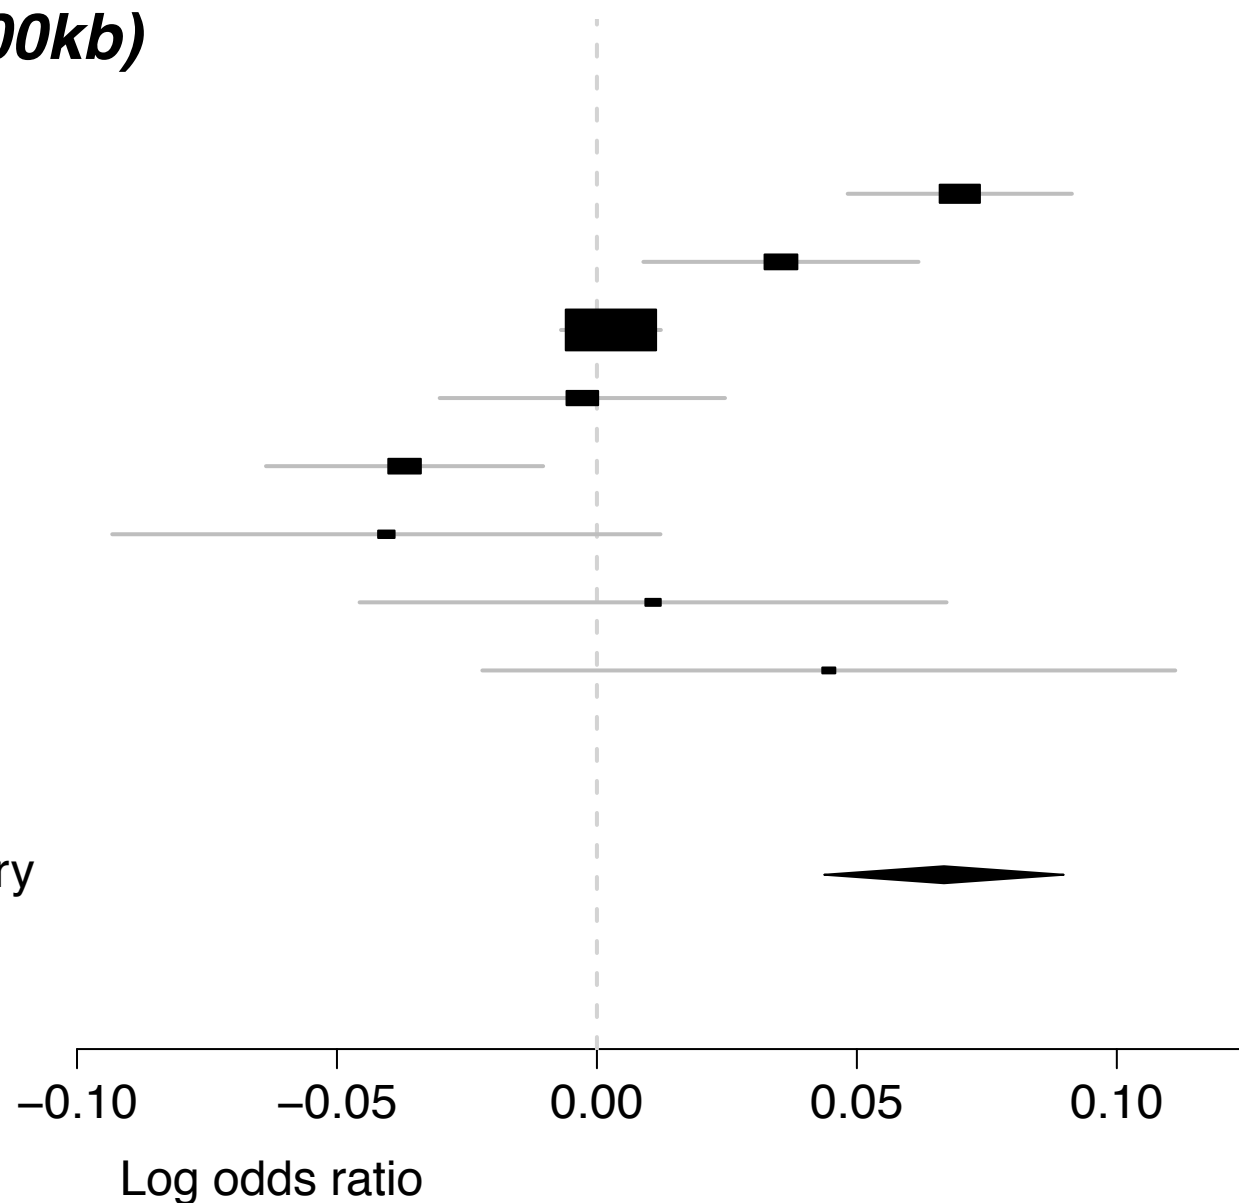

## PM-Plot

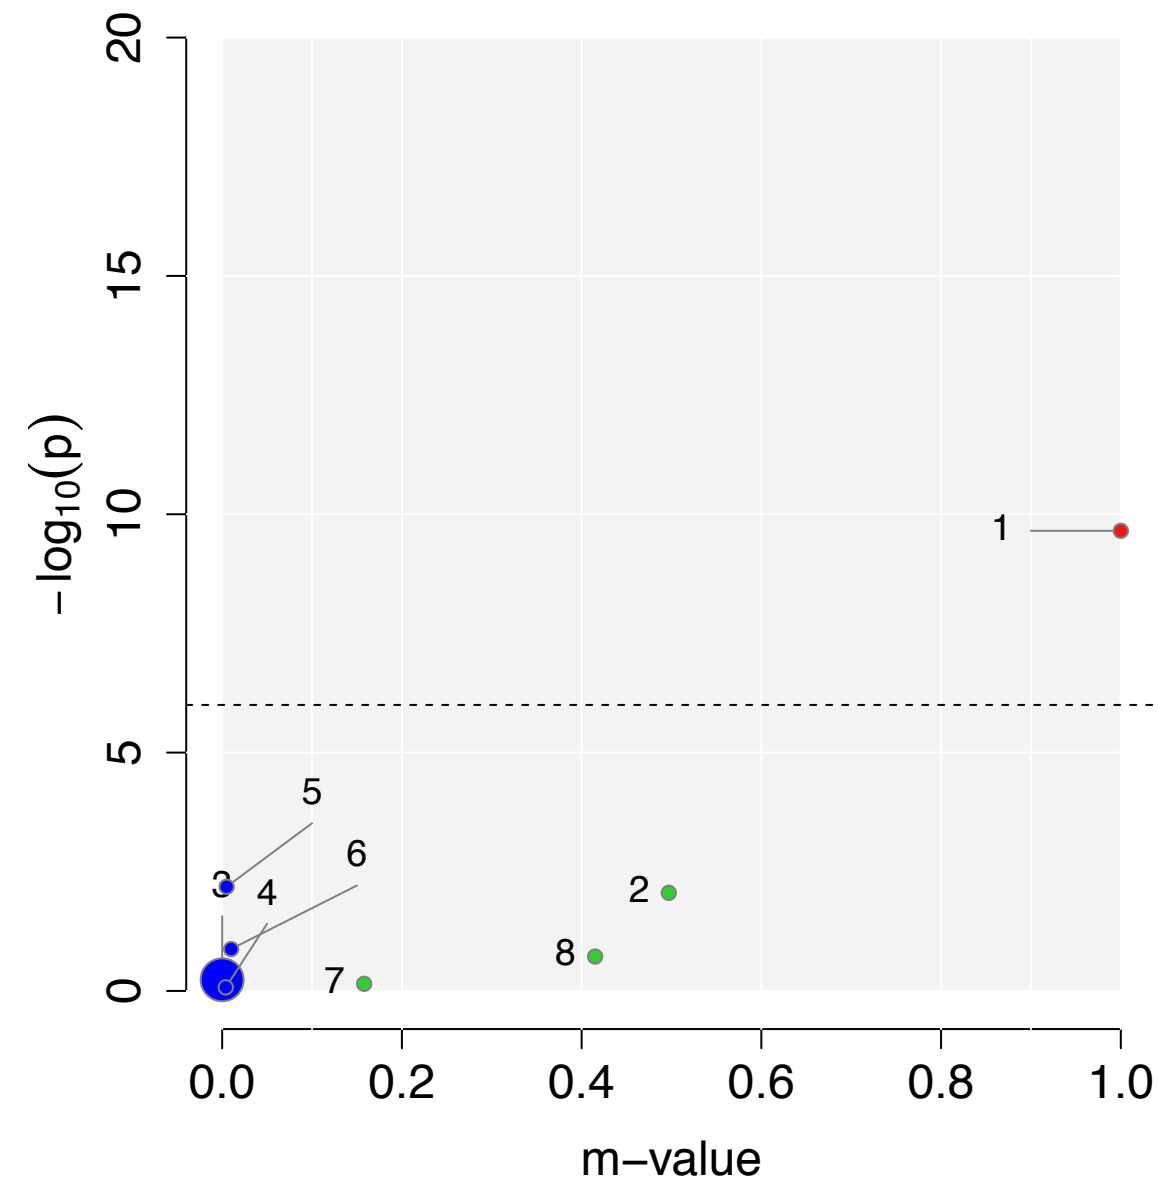

# rs2514218 (Meta $P = 1.58 \times 10^{-11}$ )

Gene : *DRD2*

## GWAS P-value

- 4.82 x 10<sup>-10</sup> ● 1.SCZ
- 0.0006 ● 2.BIP
- 3.77 x 10<sup>-7</sup> ● 3.MD
- 0.6562 ● 4.ASD
- 0.1772 ● 5.ADHD
- 0.4333 ● 6.TS
- 0.1535 ● 7.ANO
- 0.2341 ● 8.OCD

FE summary

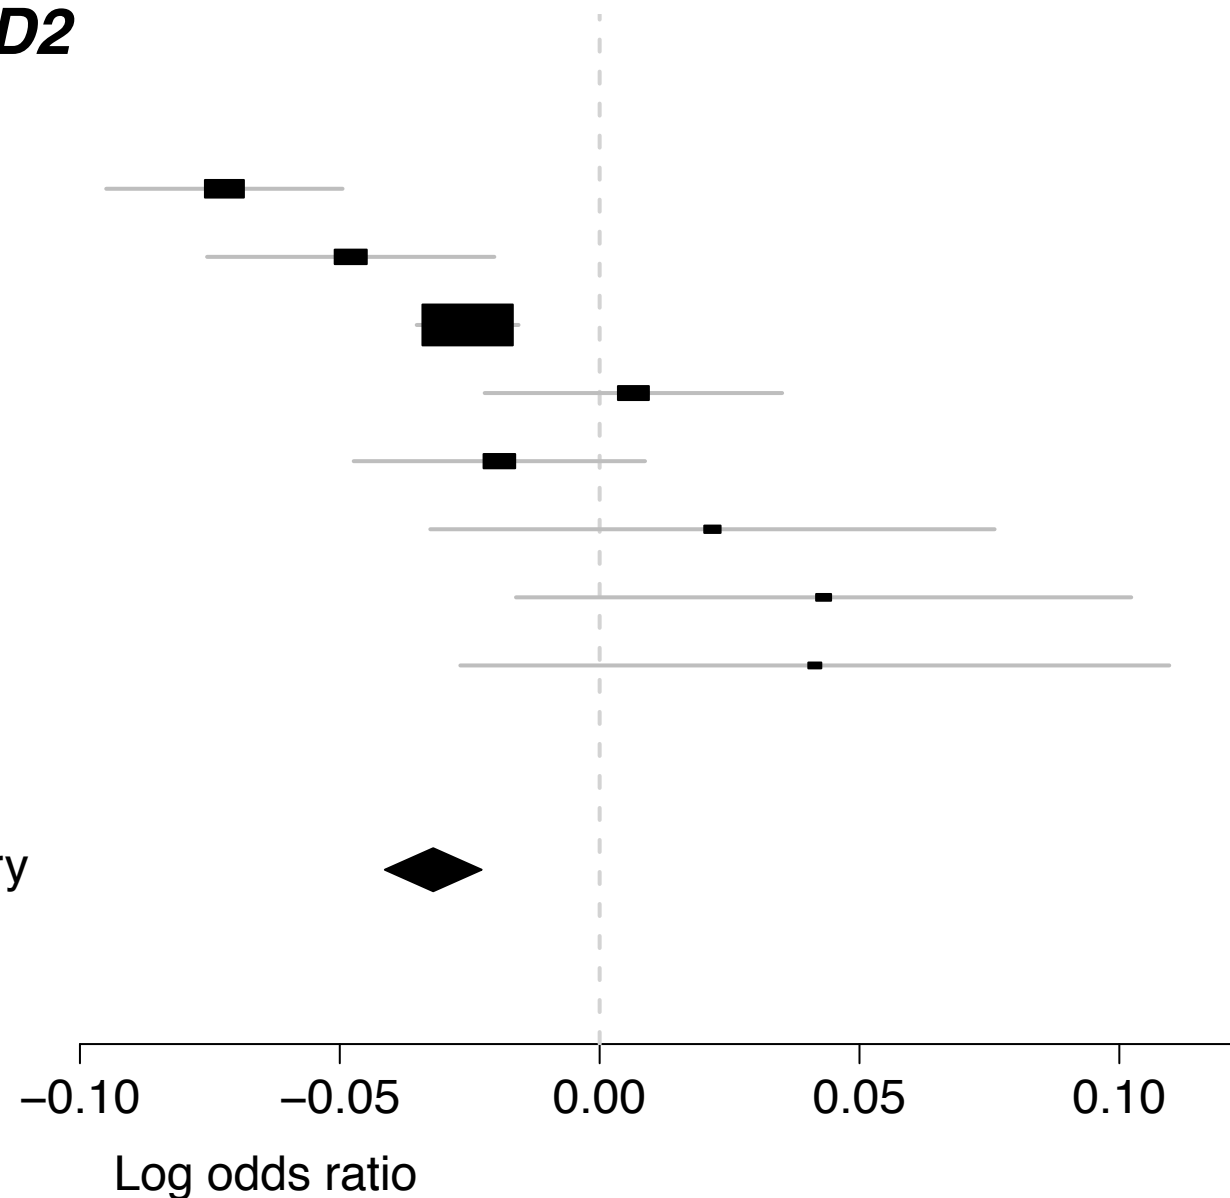

## PM-Plot

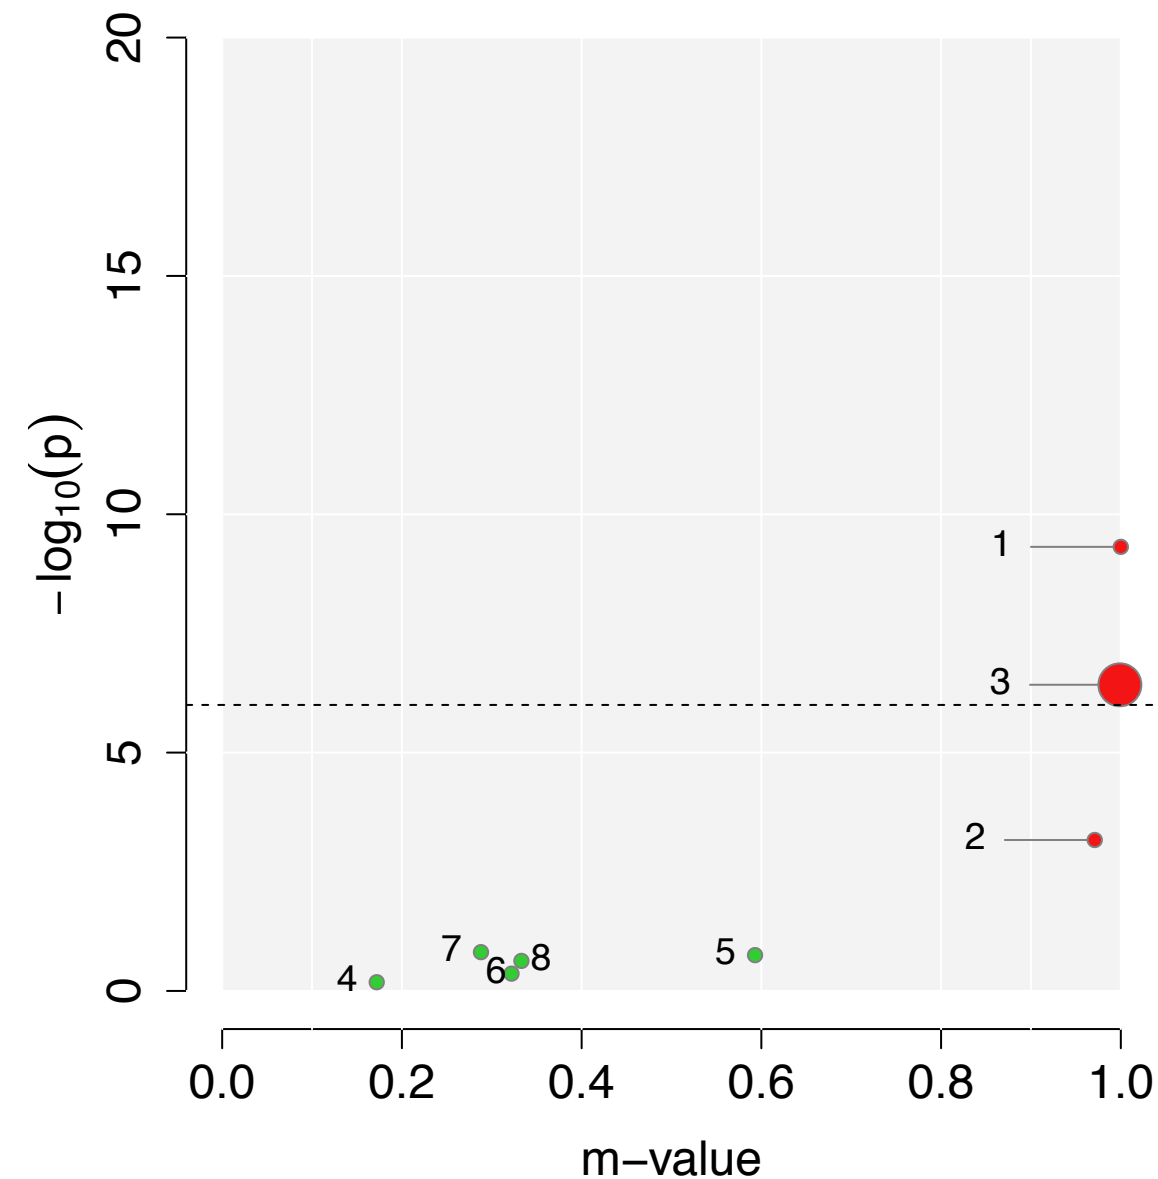

# rs2522831 (Meta $P = 2.01 \times 10^{-8}$ )

Gene : *PCLO*

## GWAS P-value

- 1.77 x 10<sup>-6</sup> ● 1.SCZ
- 0.0035 ● 2.BIP
- 1.33 x 10<sup>-5</sup> ● 3.MD
- 0.1316 ● 4.ASD
- 0.0078 ● 5.ADHD
- 0.8829 ● 6.TS
- 0.0290 ● 7.ANO
- 0.9455 ● 8.OCD

FE summary

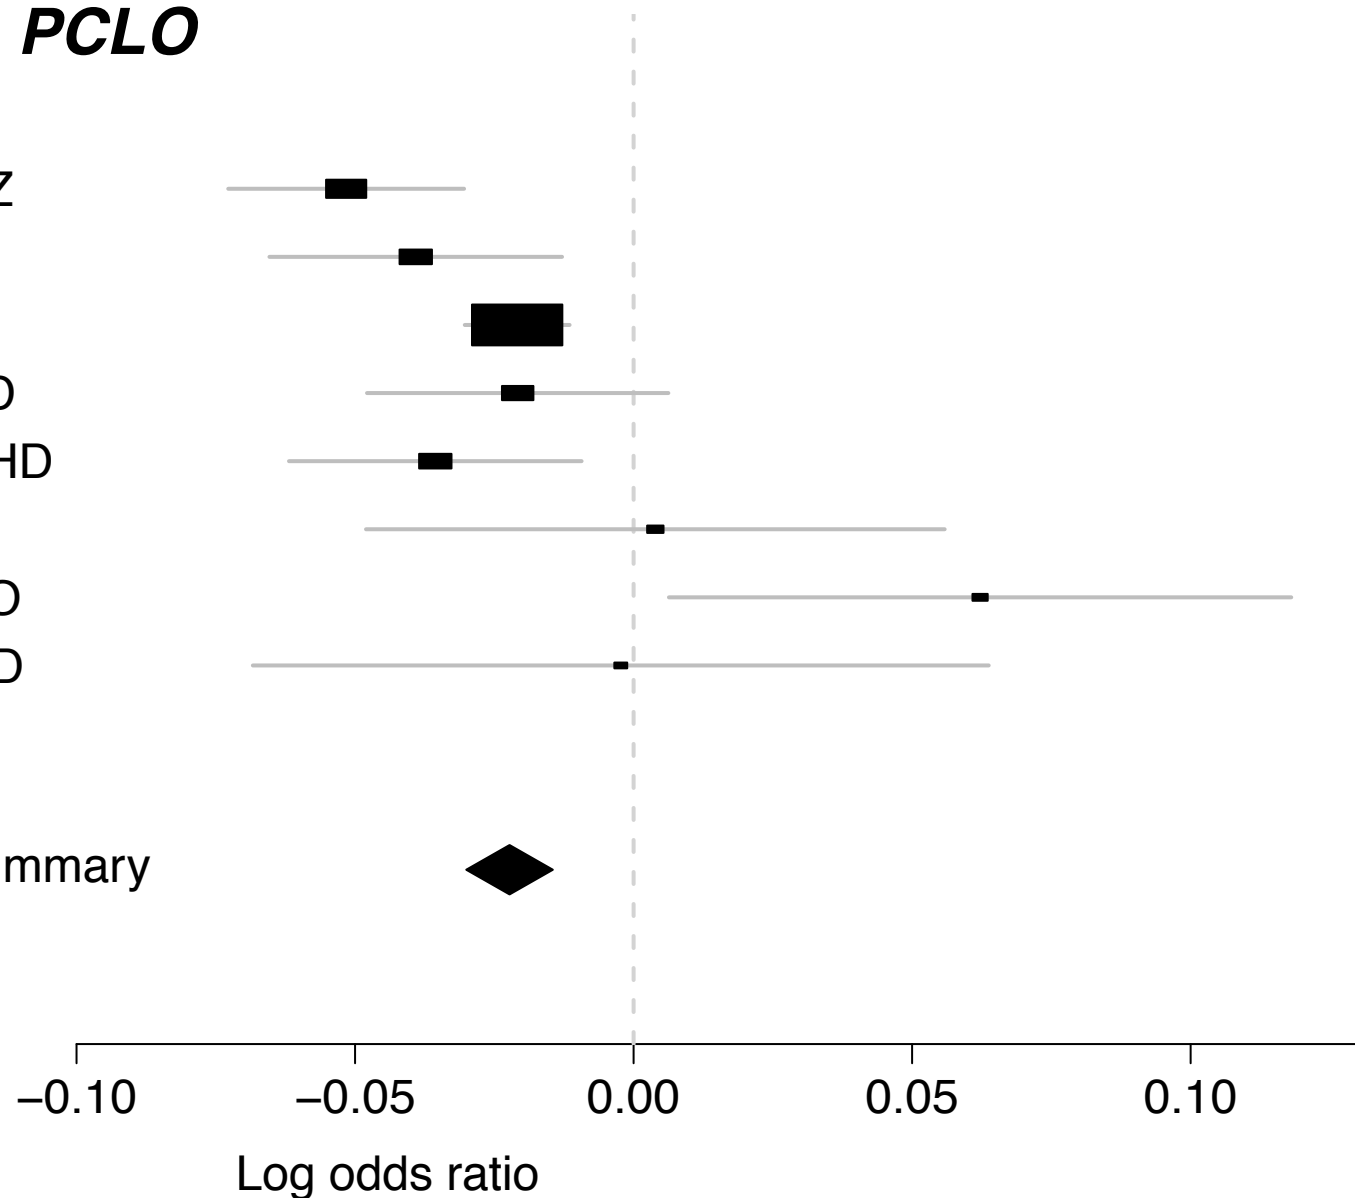

## PM-Plot

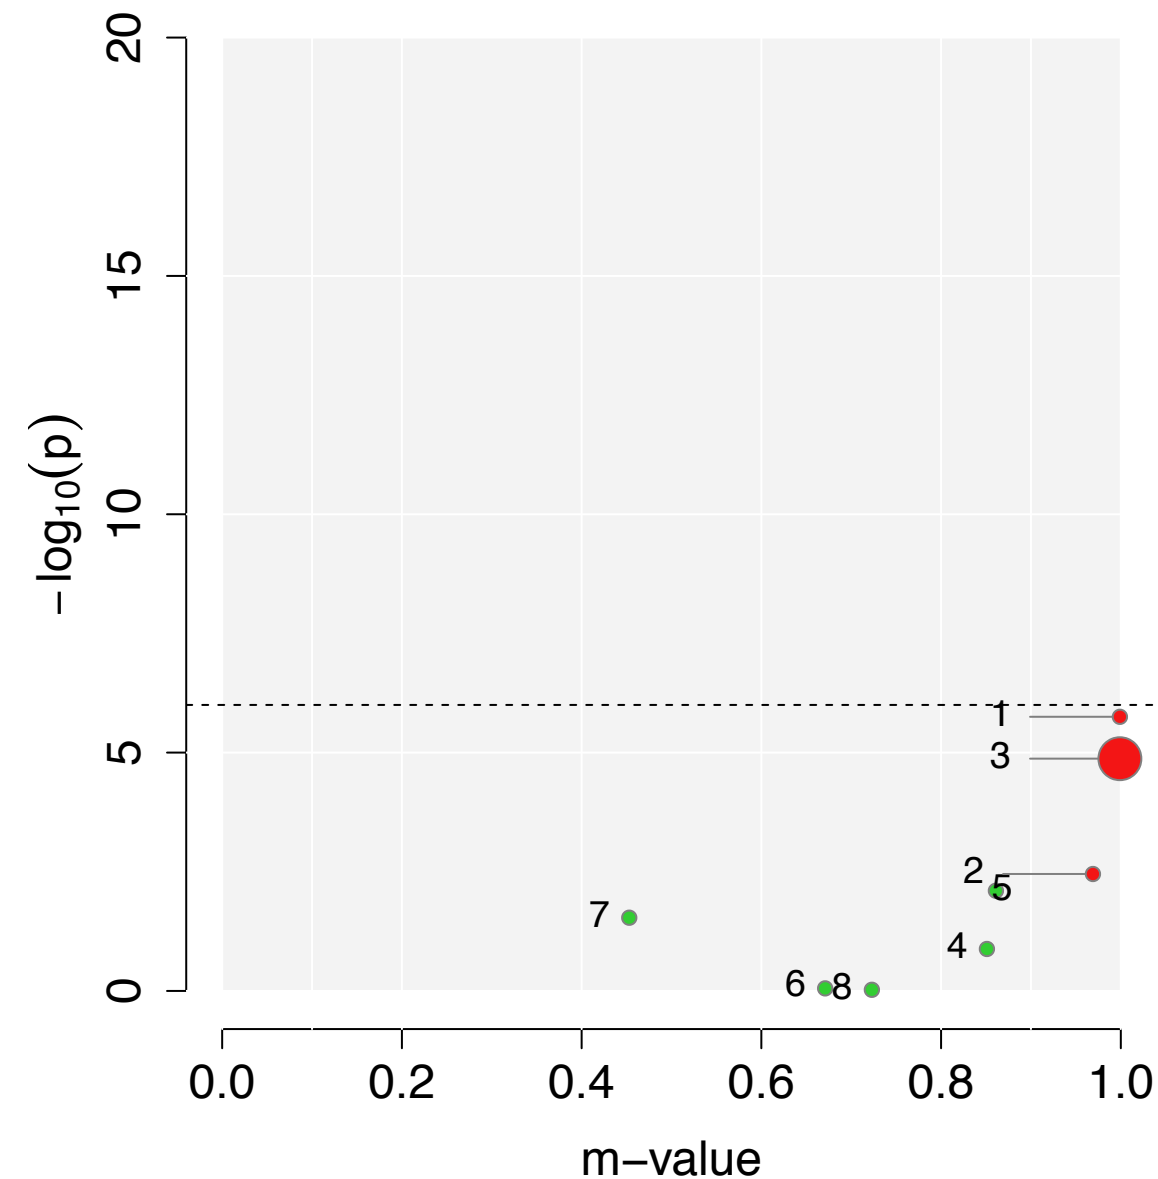

rs2693698 (Meta  $P = 3.04 \times 10^{-10}$ )

Gene : *BCL11B*

GWAS P-value

- 2.71 x 10<sup>-8</sup> ● 1.SCZ
- 1.65 x 10<sup>-5</sup> ● 2.BIP
- 0.0104 ● 3.MD
- 0.2079 ● 4.ASD
- 0.0606 ● 5.ADHD
- 0.0252 ● 6.TS
- 0.0299 ● 7.ANO
- 0.7599 ● 8.OCD

FE summary

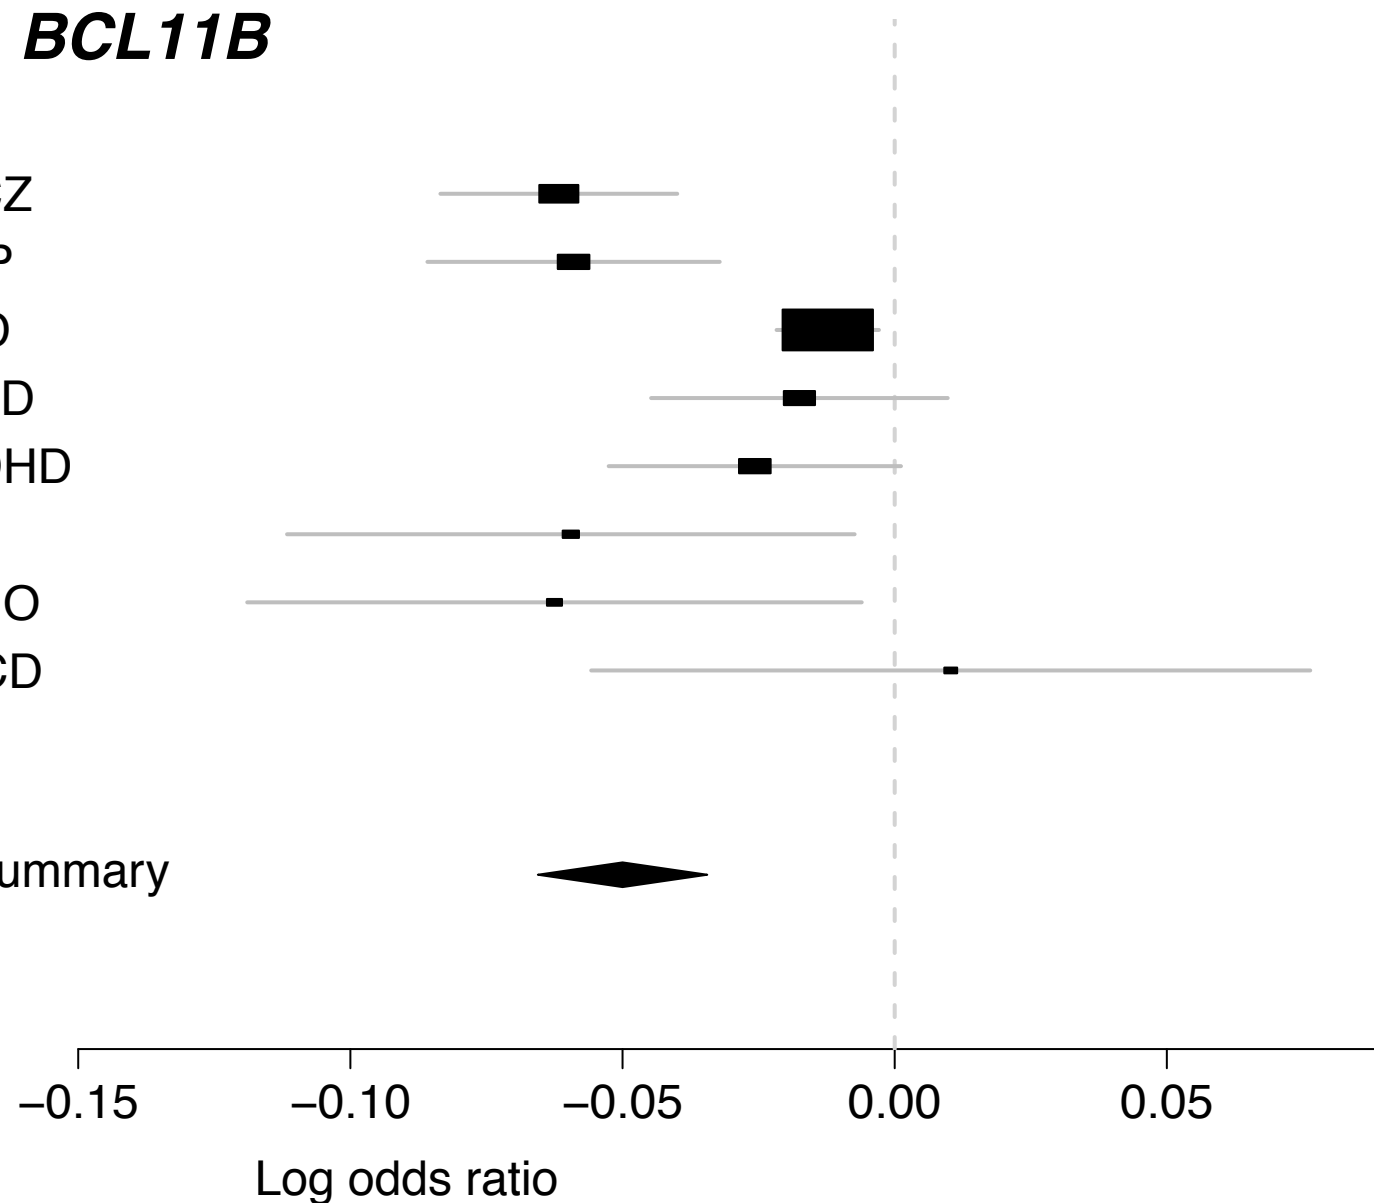

PM-Plot

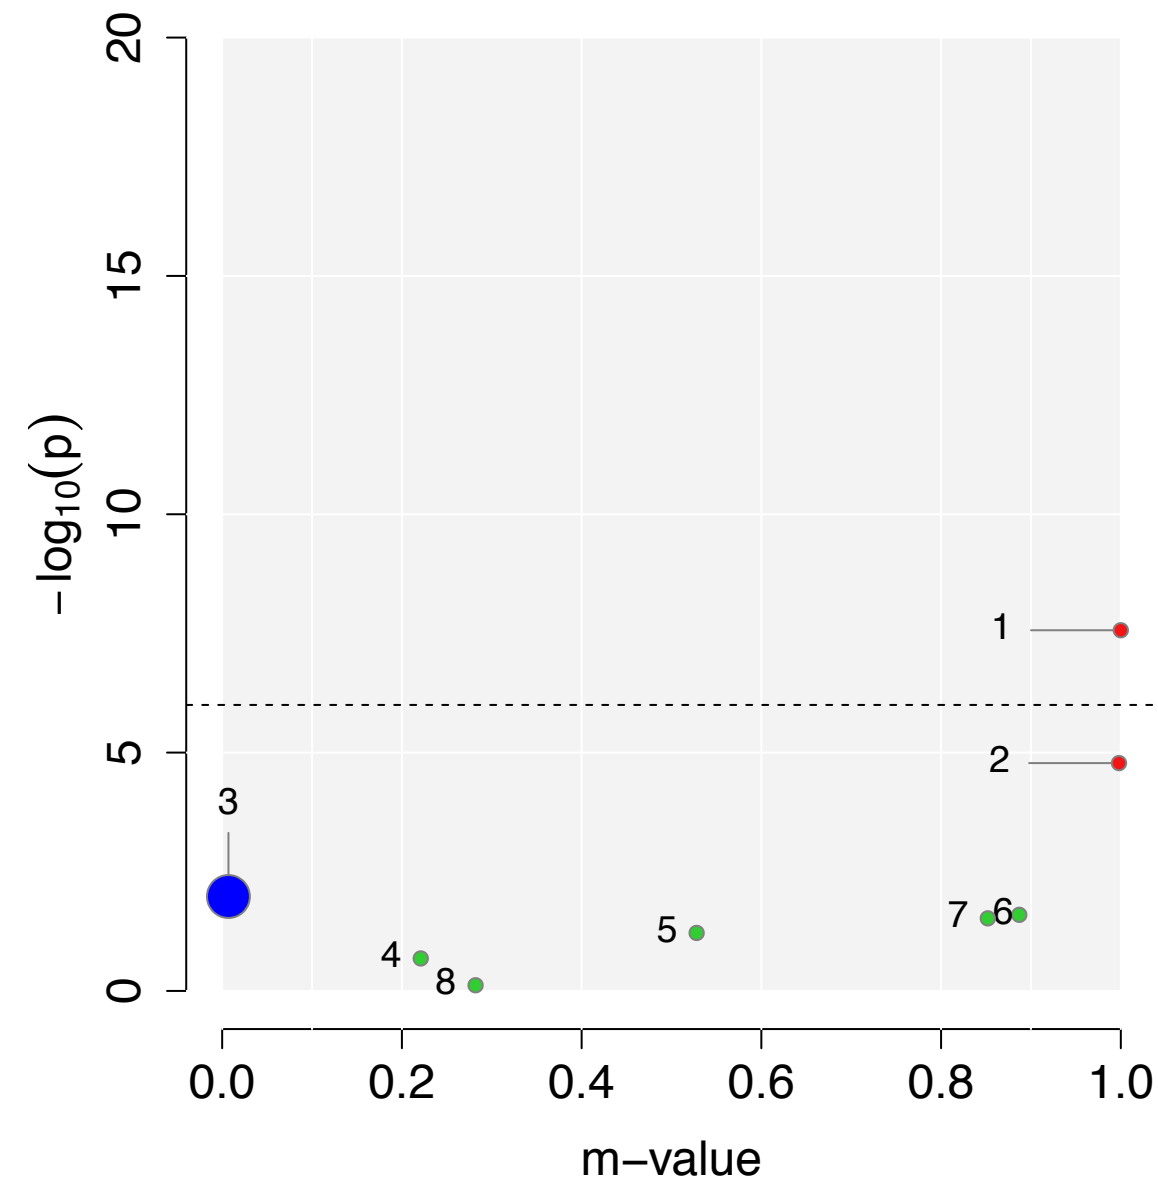



# rs2801578 (Meta $P = 2.75 \times 10^{-8}$ )

Gene : *PDE4B*

## GWAS P-value

- 8.59 x 10<sup>-8</sup> ● 1.SCZ
- 0.7586 ● 2.BIP
- 0.8224 ● 3.MD
- 0.2025 ● 4.ASD
- 0.0004 ● 5.ADHD
- 0.5265 ● 6.TS
- 0.1243 ● 7.ANO
- 0.0984 ● 8.OCD

FE summary

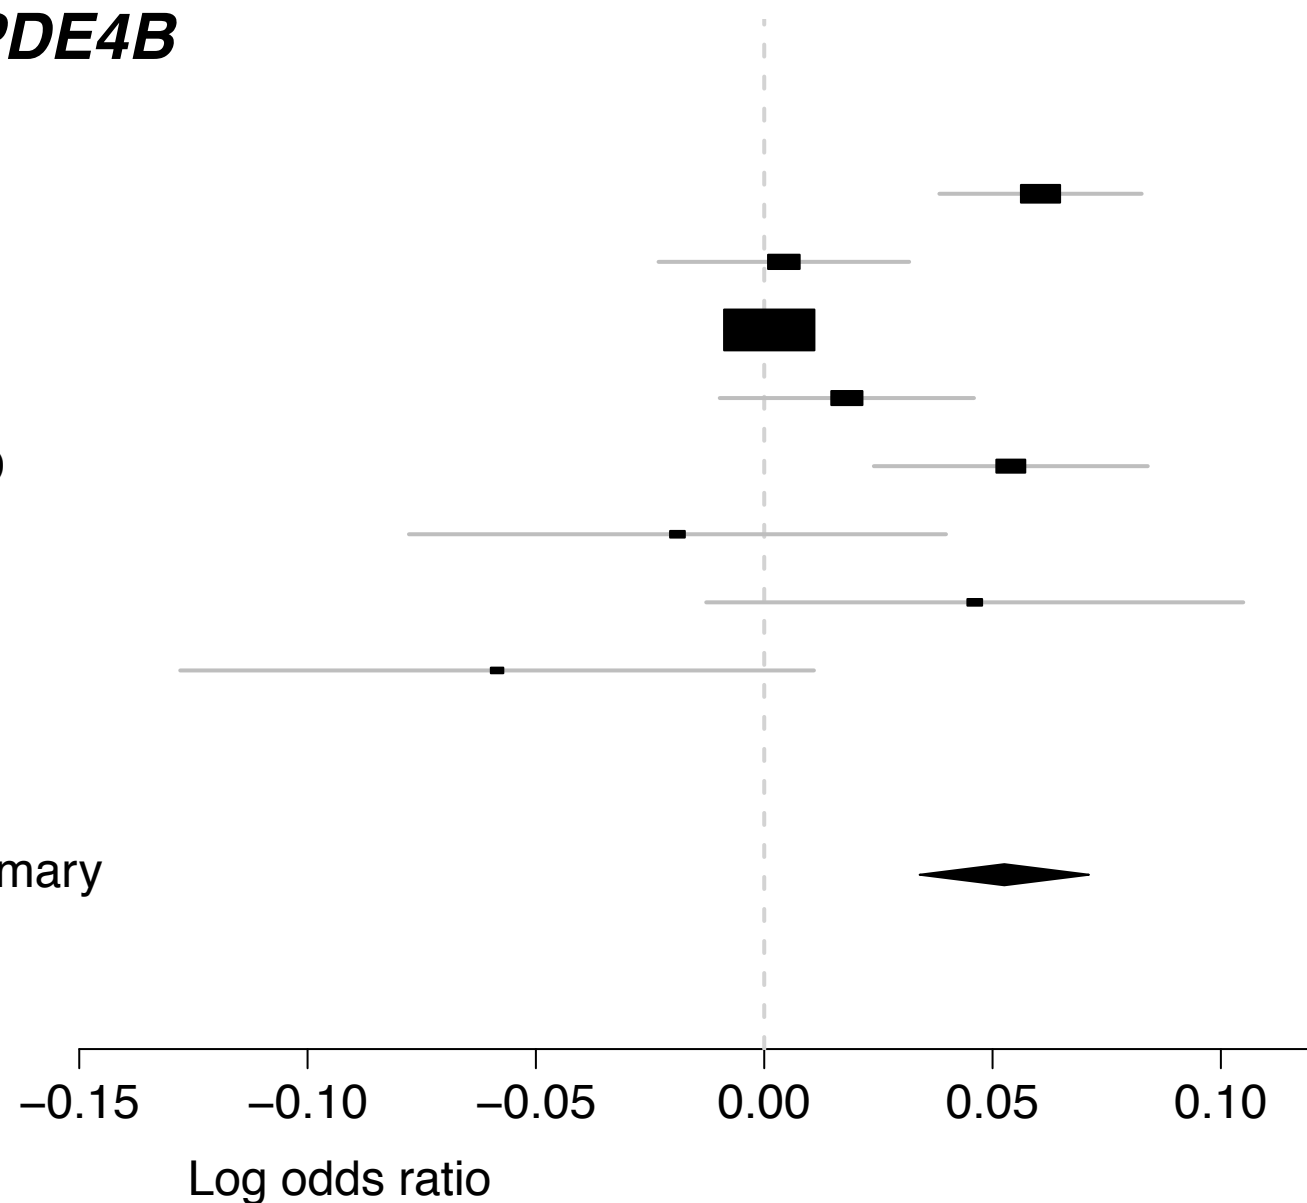

## PM-Plot

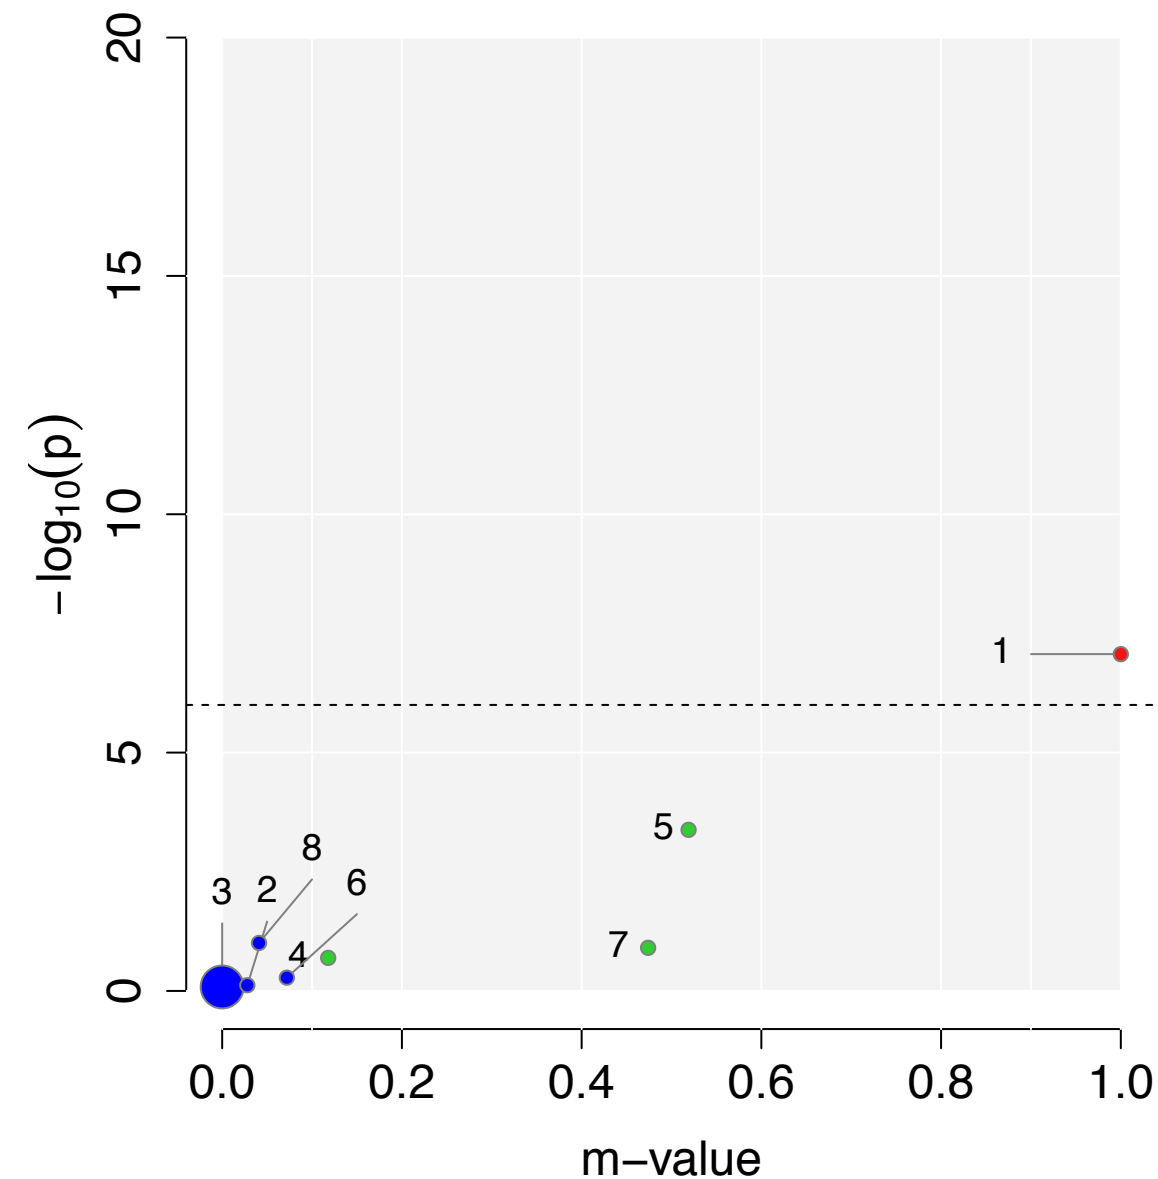

# rs2842198 (Meta $P = 9.7e \times 10^{-9}$ )

Gene : *HYI*, *SZT2*

## GWAS P-value

- 8.86 x 10<sup>-5</sup> ● 1.SCZ
- 0.2154 ● 2.BIP
- 0.8224 ● 3.MD
- 0.5449 ● 4.ASD
- 6.40 x 10<sup>-9</sup> ● 5.ADHD
- 0.6534 ● 6.TS
- 0.1259 ● 7.ANO
- 0.6439 ● 8.OCD

FE summary

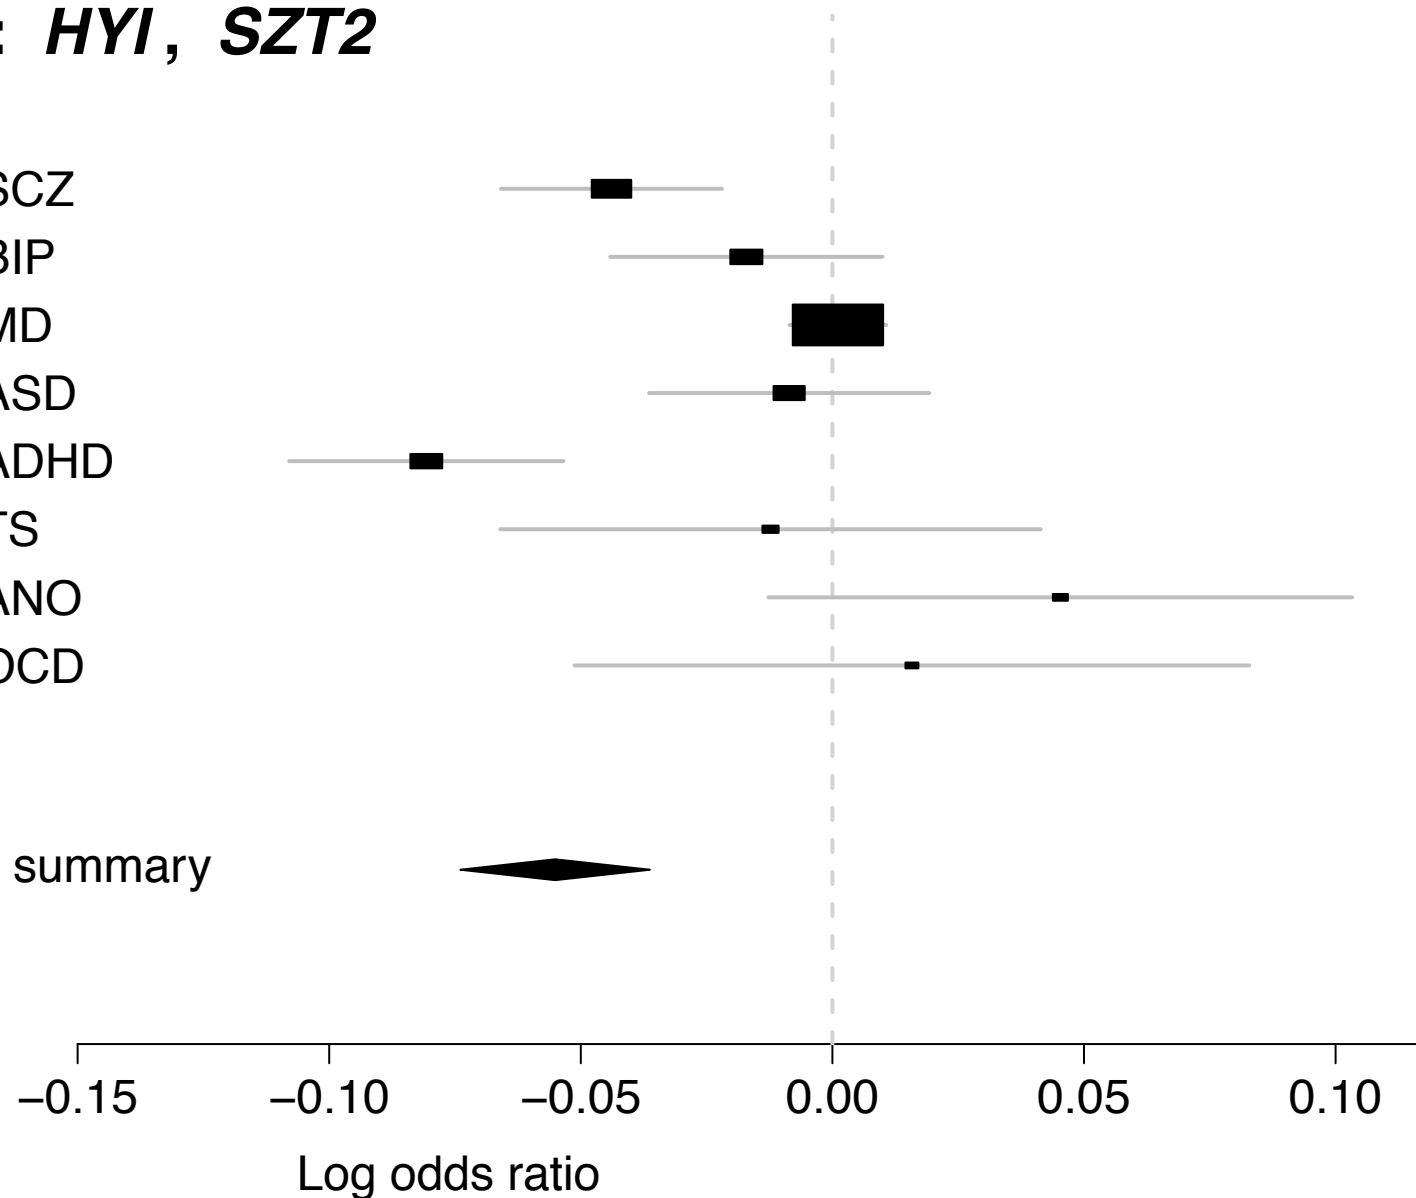

## PM-Plot

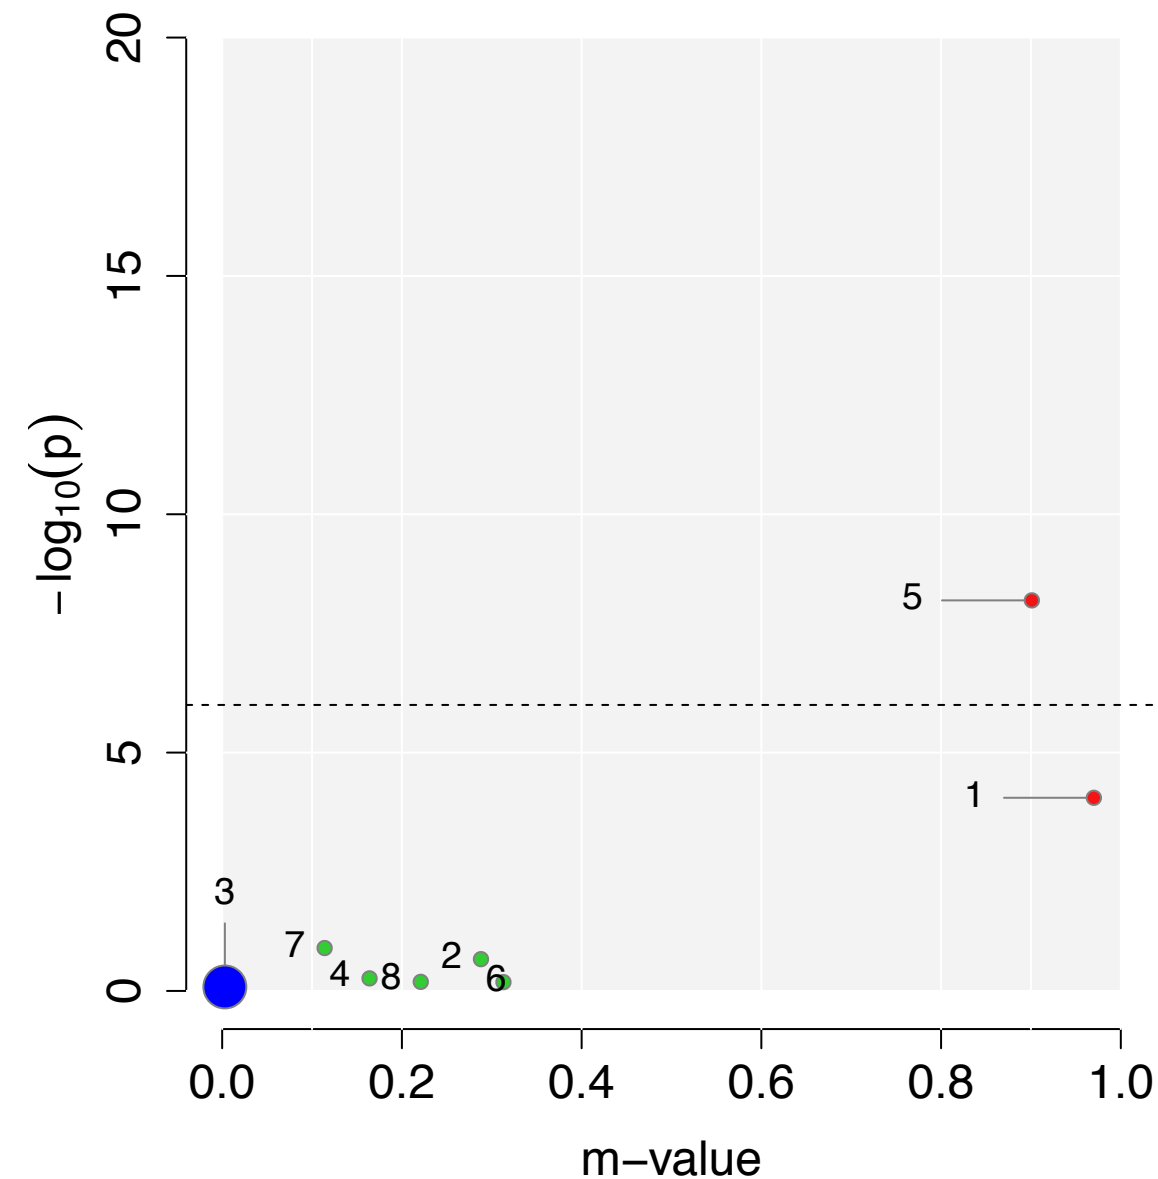

# rs2910032 (Meta $P = 4.38 \times 10^{-8}$ )

Gene : (>200kb)

## GWAS P-value

- 5.42 x 10<sup>-9</sup> ● 1.SCZ
- 0.0033 ● 2.BIP
- 0.6614 ● 3.MD
- 0.0217 ● 4.ASD
- 0.1316 ● 5.ADHD
- 0.7062 ● 6.TS
- 0.0633 ● 7.ANO
- 0.7381 ● 8.OCD

FE summary

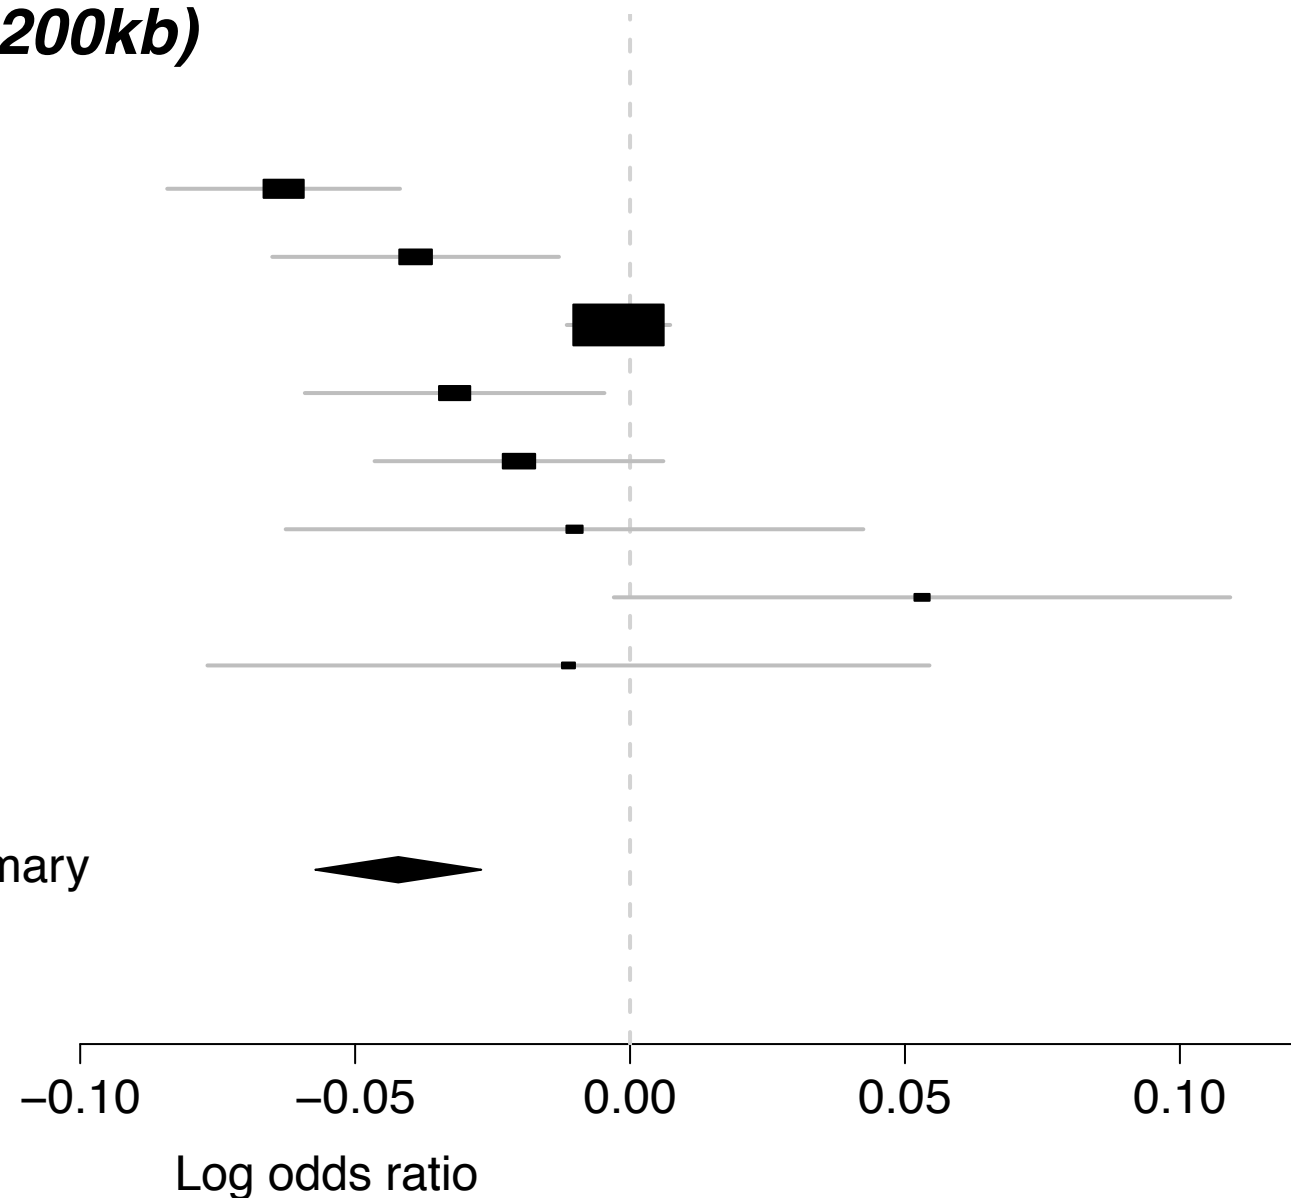

## PM-Plot

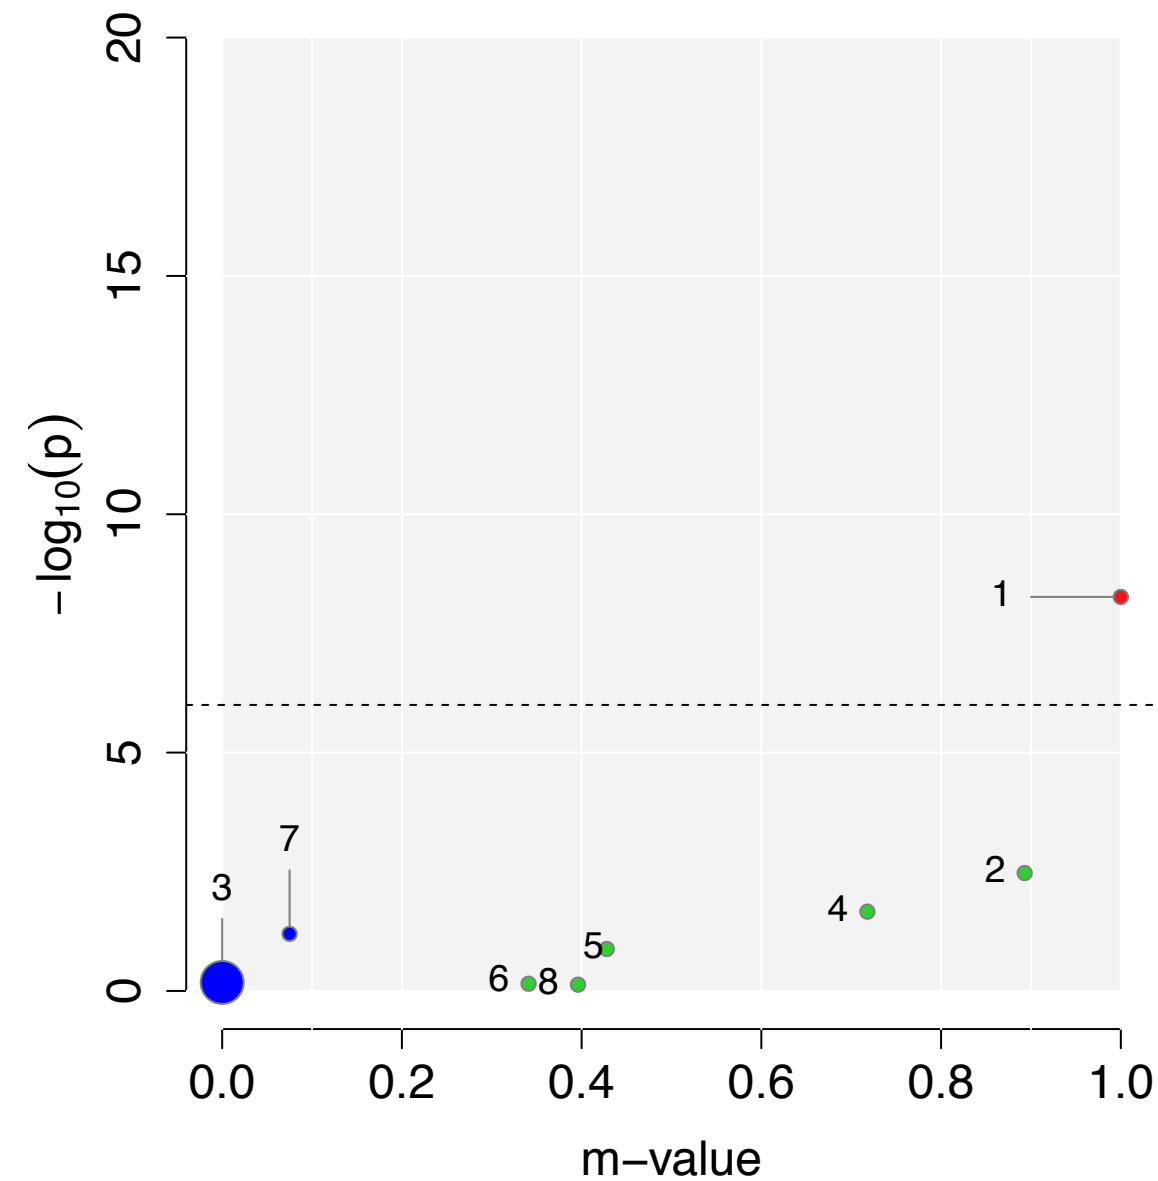

rs3001723 (Meta  $P = 7.44 \times 10^{-14}$ )

Gene : *PTPRF*, *KDM4A*

GWAS P-value

- 1.07 x 10<sup>-8</sup> ● 1.SCZ
- 0.0179 ● 2.BIP
- 0.0647 ● 3.MD
- 0.2985 ● 4.ASD
- 4.99 x 10<sup>-10</sup> ● 5.ADHD
- 0.3560 ● 6.TS
- 0.8160 ● 7.ANO
- 0.4442 ● 8.OCD

FE summary

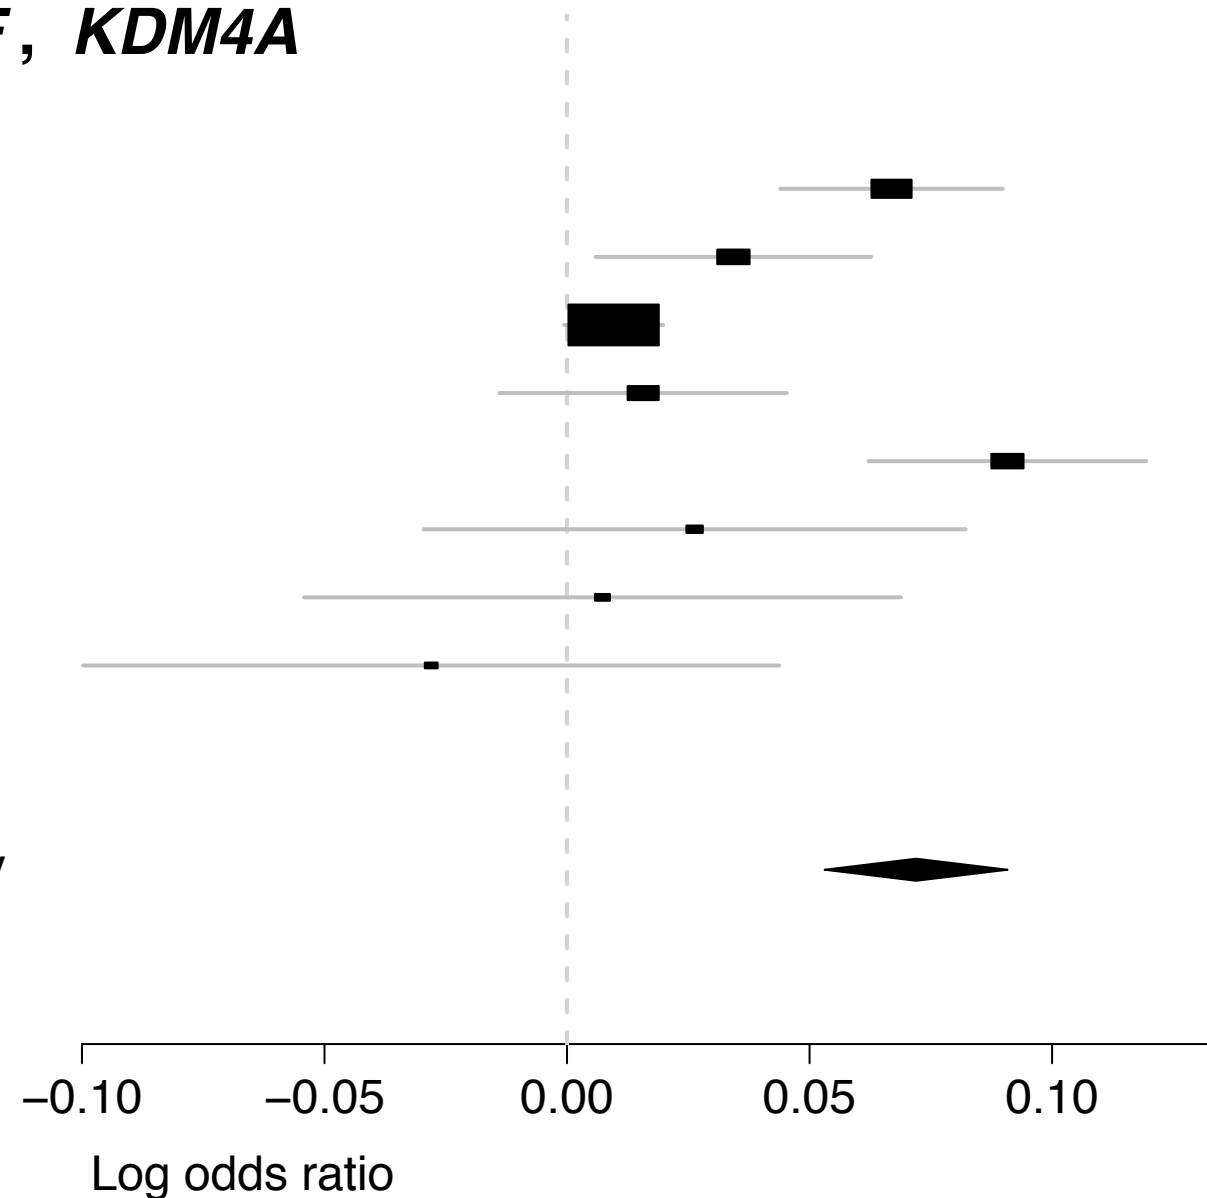

PM-Plot

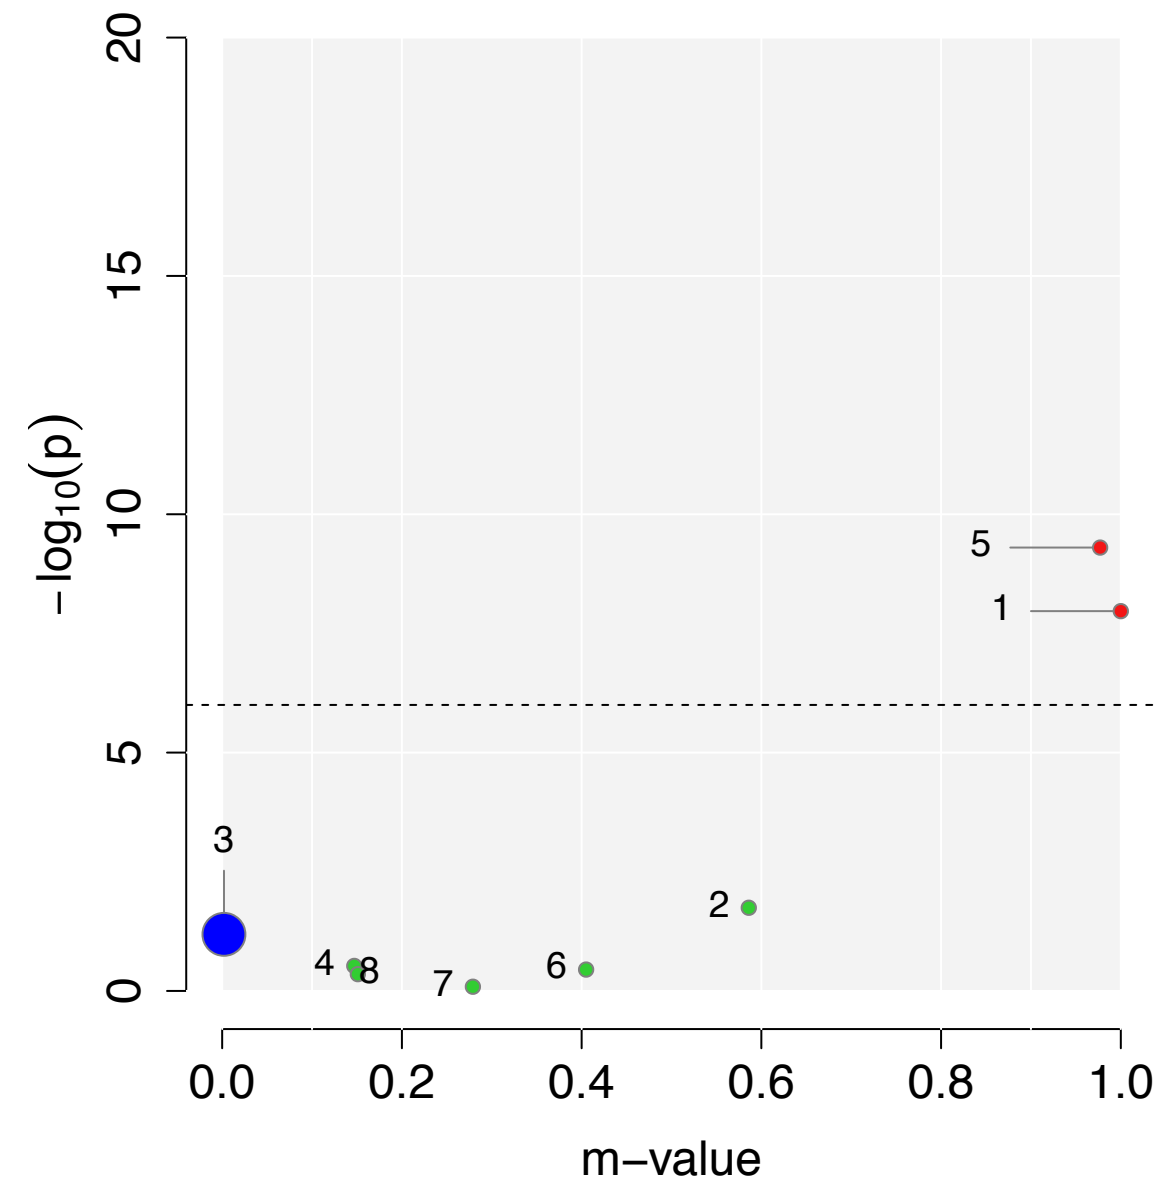

rs3798869 (Meta  $P = 7.69 \times 10^{-11}$ )

Gene : *SNAP91* , *PRSS35*

GWAS P-value

- 1.25 x 10<sup>-9</sup> ● 1.SCZ
- 1.04 x 10<sup>-5</sup> ● 2.BIP
- 0.0196 ● 3.MD
- 0.4202 ● 4.ASD
- 0.8587 ● 5.ADHD
- 0.2079 ● 6.TS
- 0.6280 ● 7.ANO
- 0.0335 ● 8.OCD

FE summary

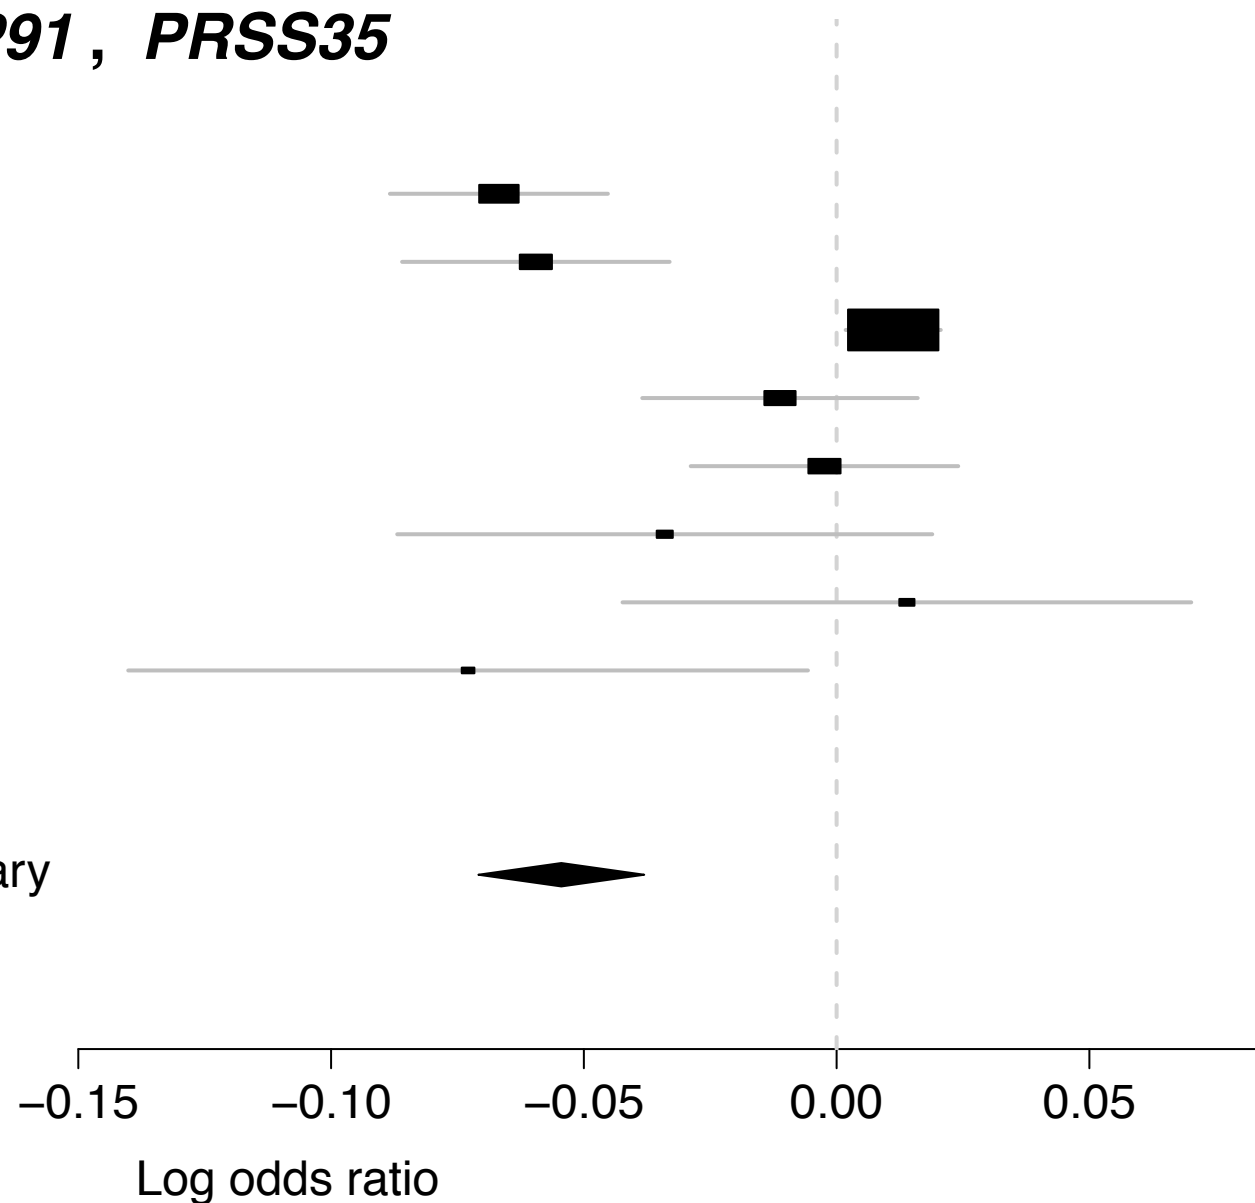

PM-Plot

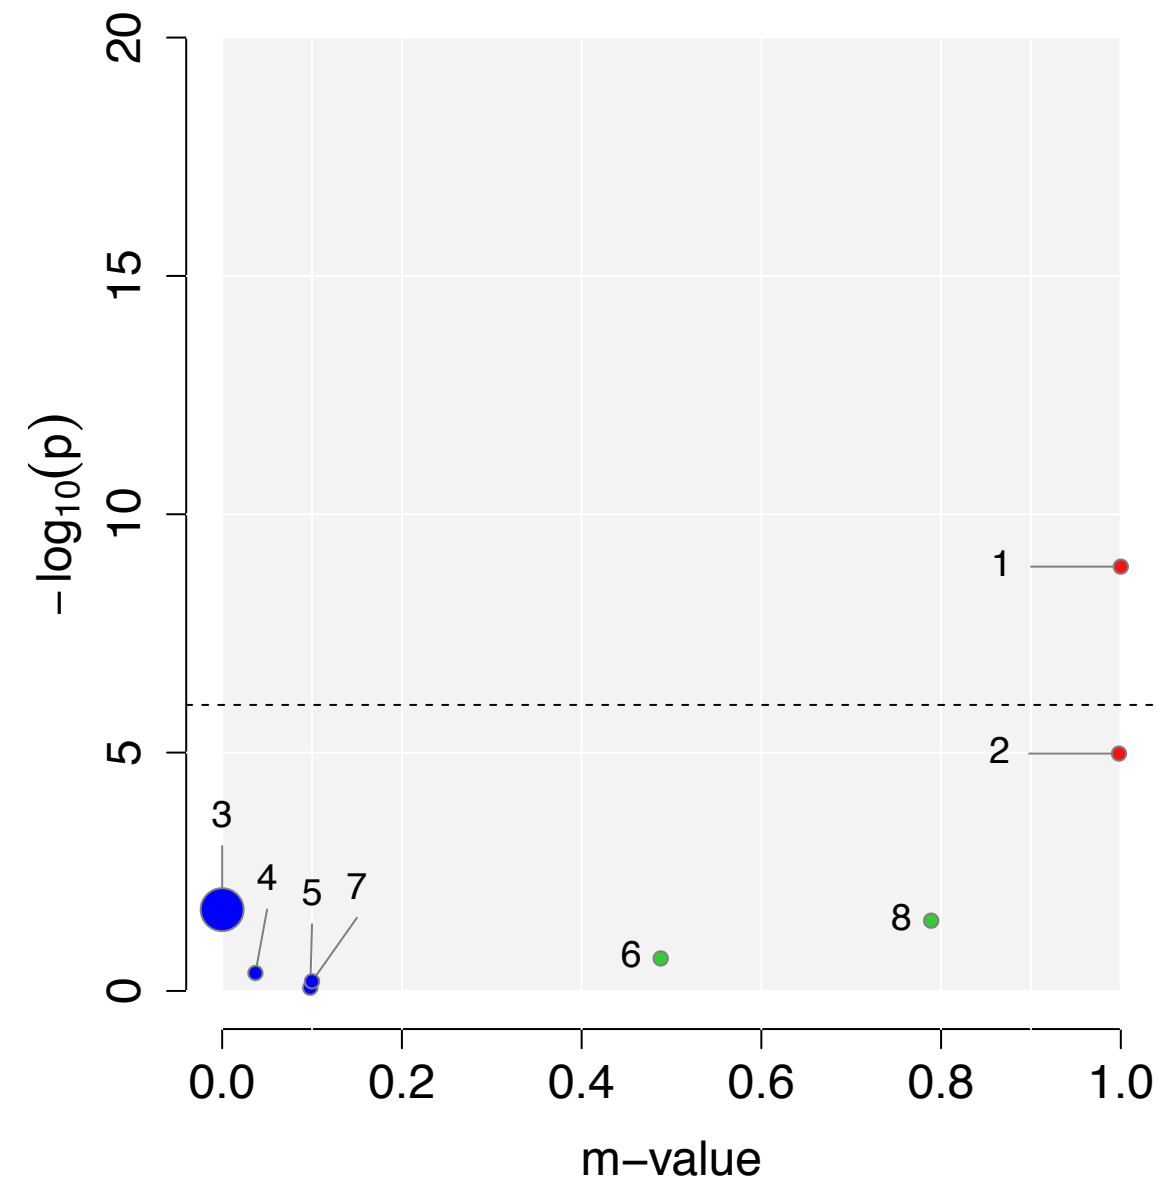

# rs3812984 (Meta $P = 2.96 \times 10^{-9}$ )

Gene : *PMFBP1*, *DHX38*

## GWAS P-value

- 0.9268 ● 1.SCZ
- 0.0034 ● 2.BIP
- $6.07 \times 10^{-8}$  ● 3.MD
- 0.0003 ● 4.ASD
- 0.4321 ● 5.ADHD
- 0.6710 ● 6.TS
- 0.1377 ● 7.ANO
- 0.1194 ● 8.OCD

FE summary

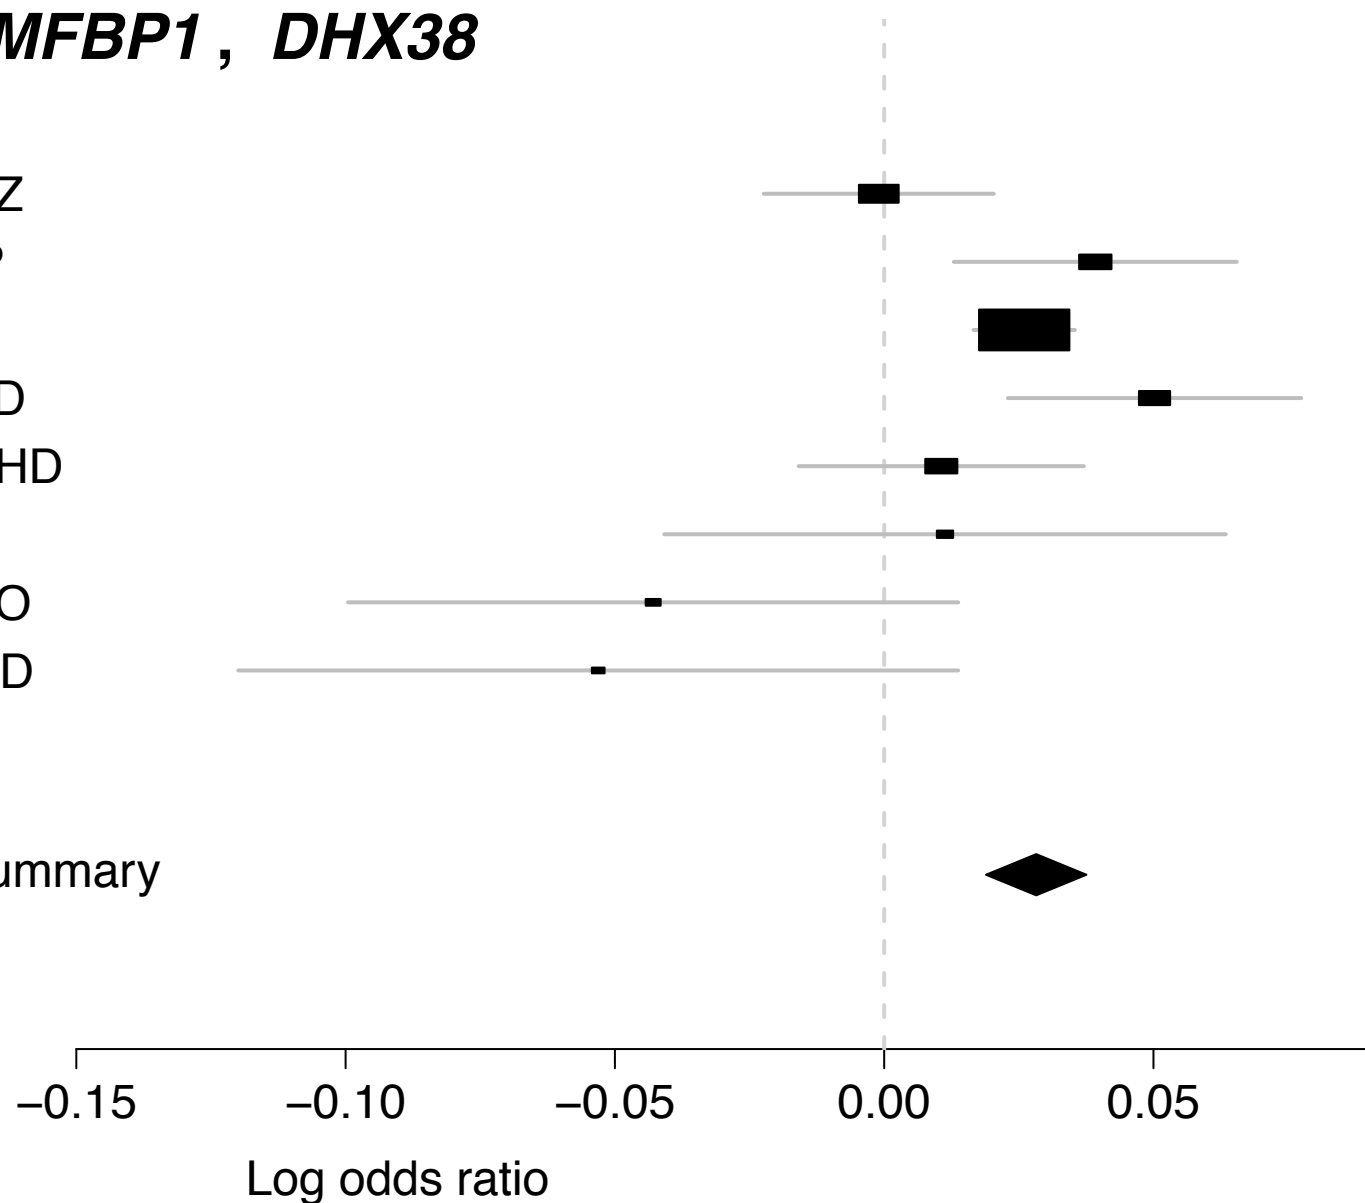

## PM-Plot

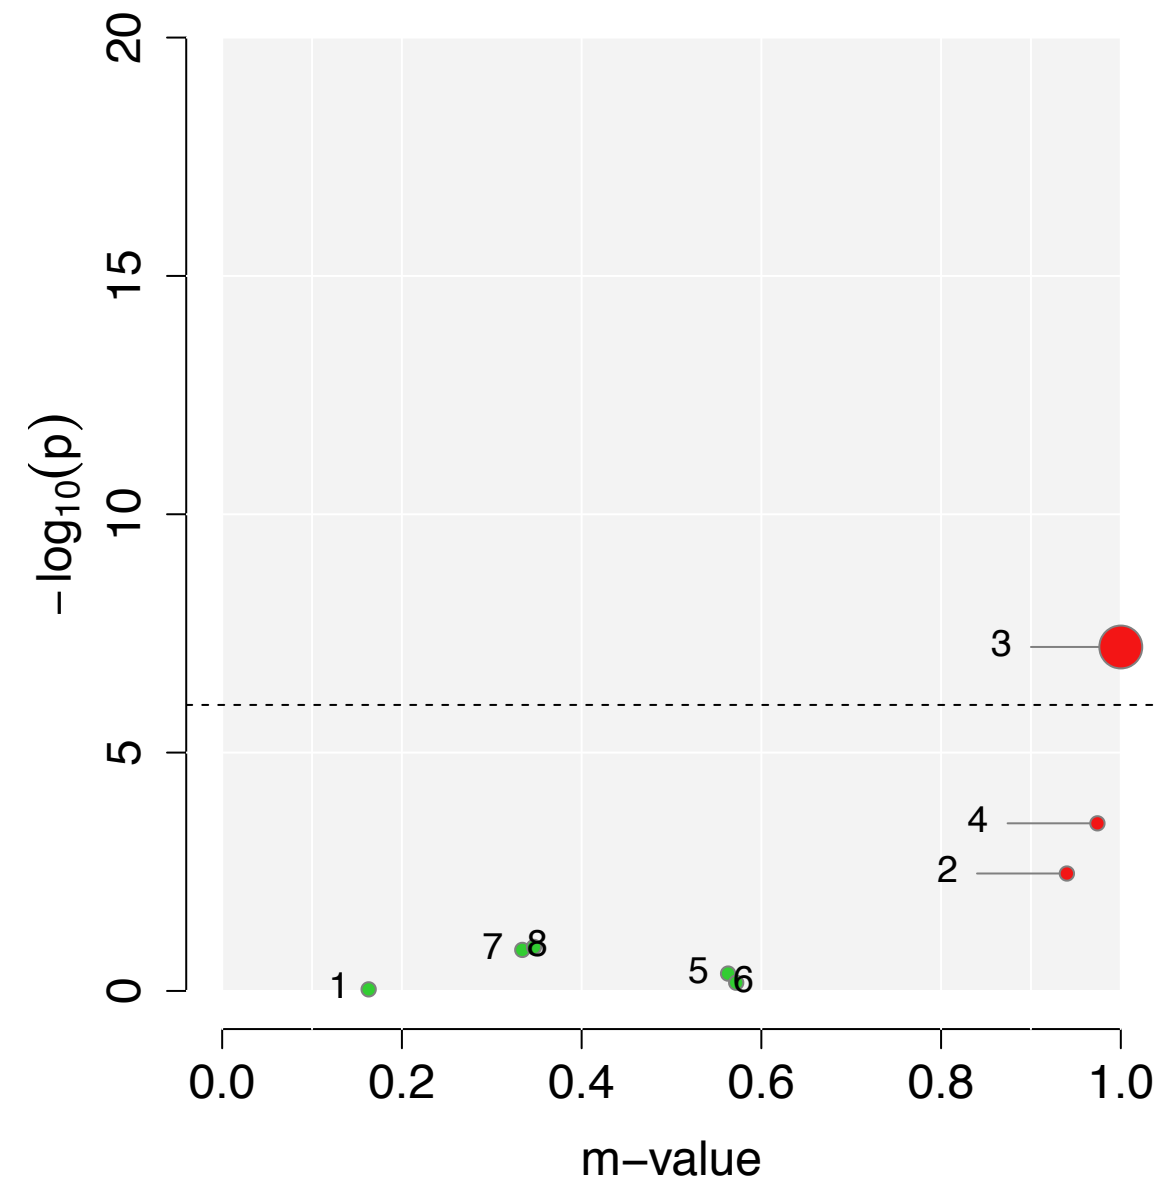

# rs4129585 (Meta $P = 2.47 \times 10^{-15}$ )

Gene : *TSNARE1*

## GWAS P-value

- $3.45 \times 10^{-13}$  ● 1.SCZ
- 0.0061 ● 2.BIP
- 0.0055 ● 3.MD
- 0.5894 ● 4.ASD
- 0.3281 ● 5.ADHD
- 0.2877 ● 6.TS
- 0.0003 ● 7.ANO
- 0.0005 ● 8.OCD

FE summary

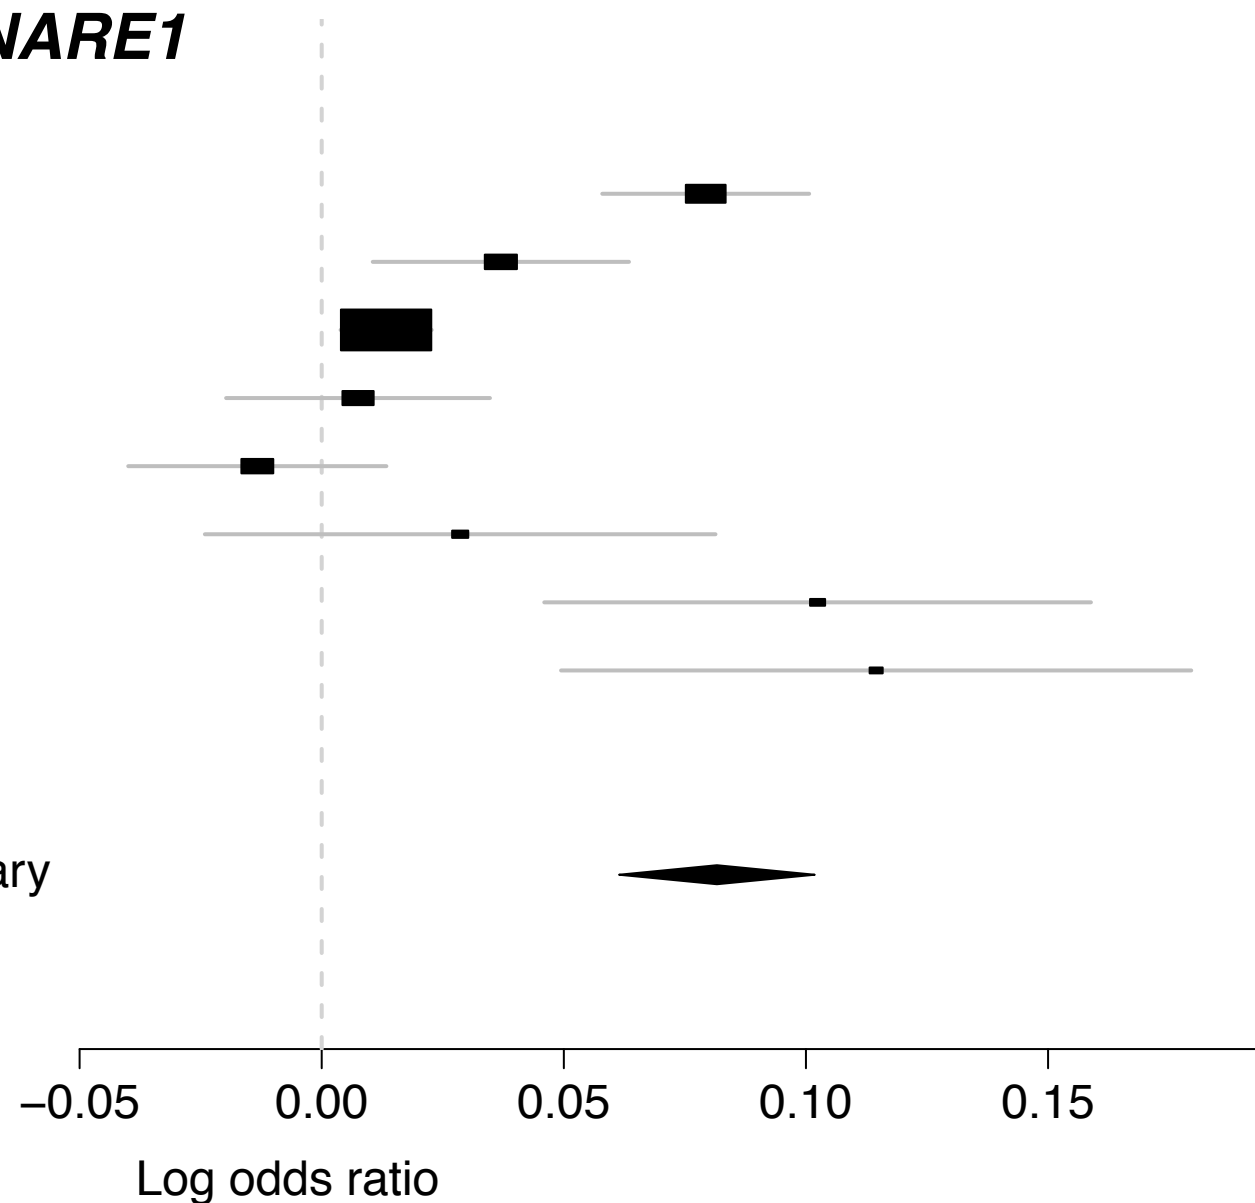

## PM-Plot

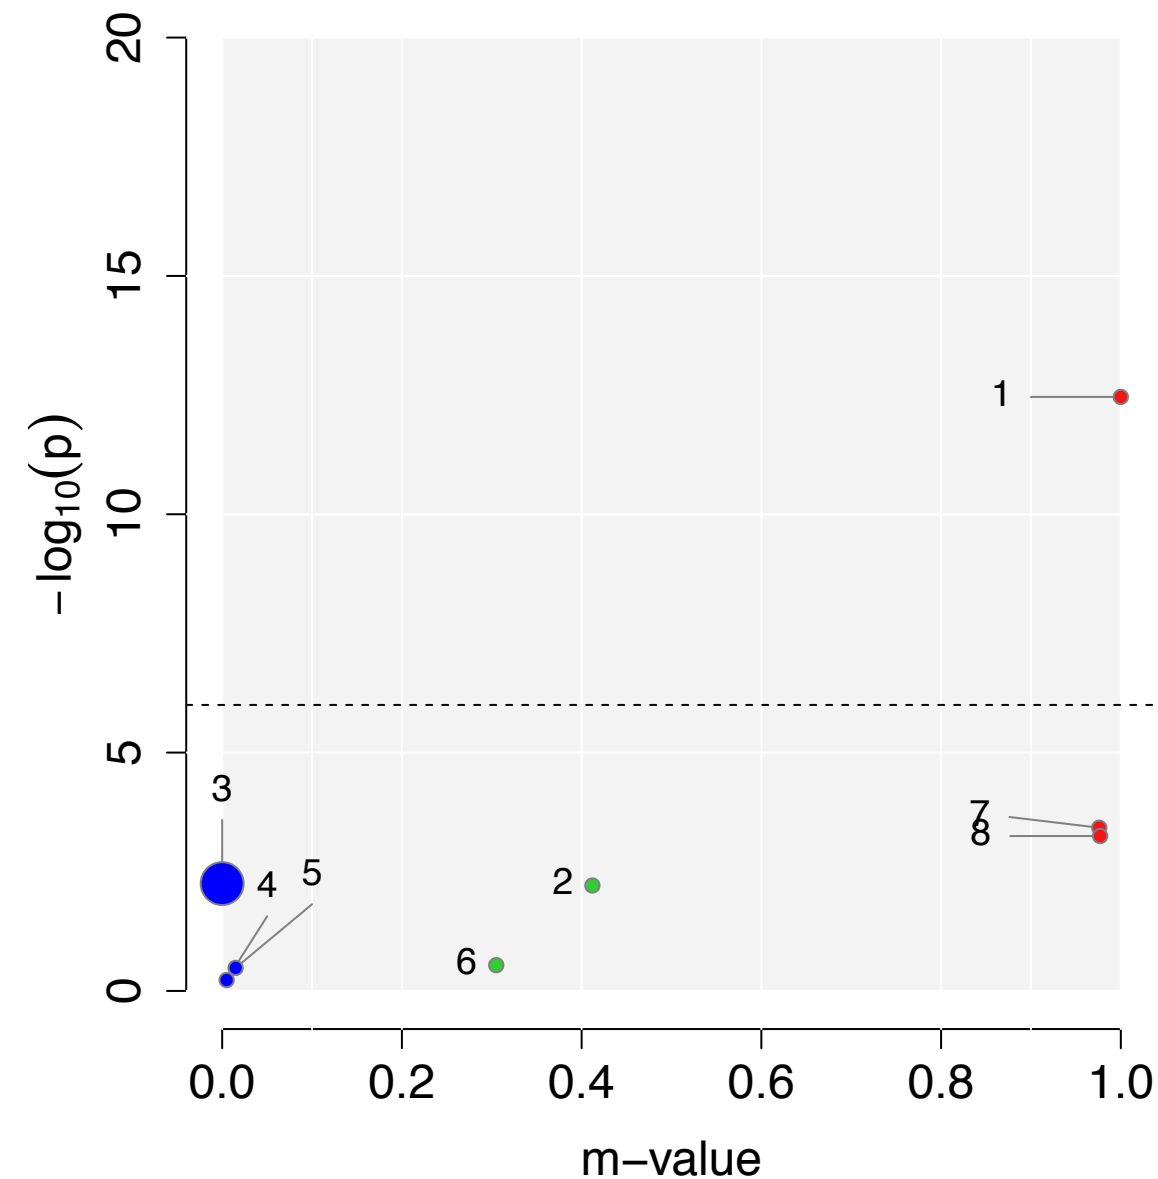

rs4242470 (Meta  $P = 2.65 \times 10^{-8}$ )

Gene : *PXDNL* , *PCMTD1*

GWAS P-value

- 0.0061 ● 1.SCZ
- 0.0214 ● 2.BIP
- $1.34 \times 10^{-7}$  ● 3.MD
- 0.4732 ● 4.ASD
- 0.0840 ● 5.ADHD
- 0.1541 ● 6.TS
- 0.3503 ● 7.ANO
- 0.4505 ● 8.OCD

FE summary

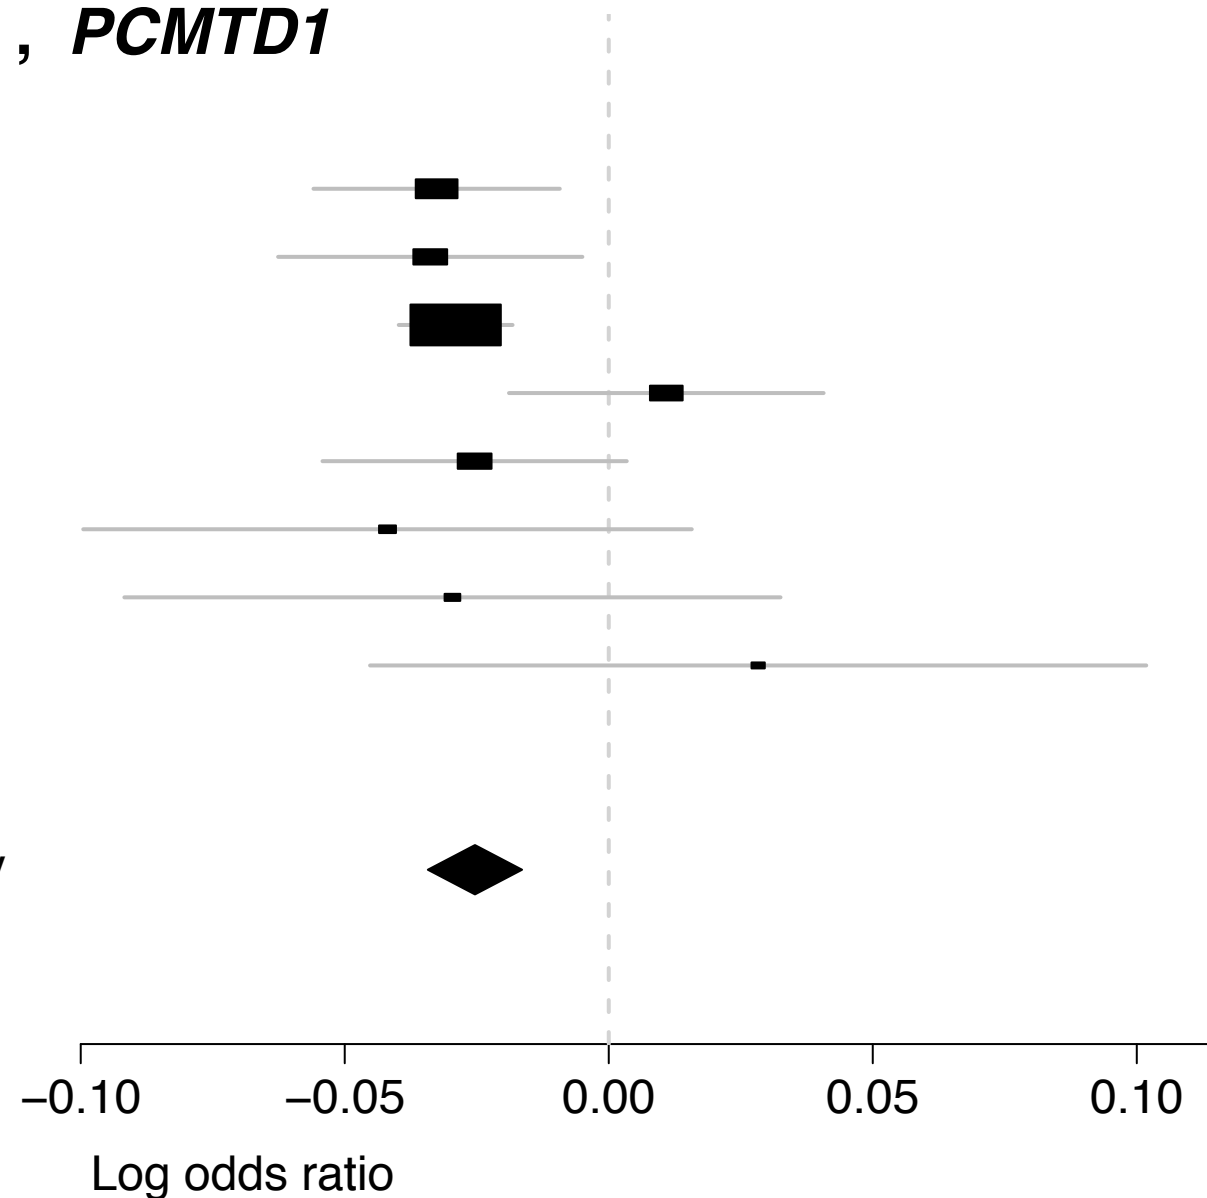

PM-Plot

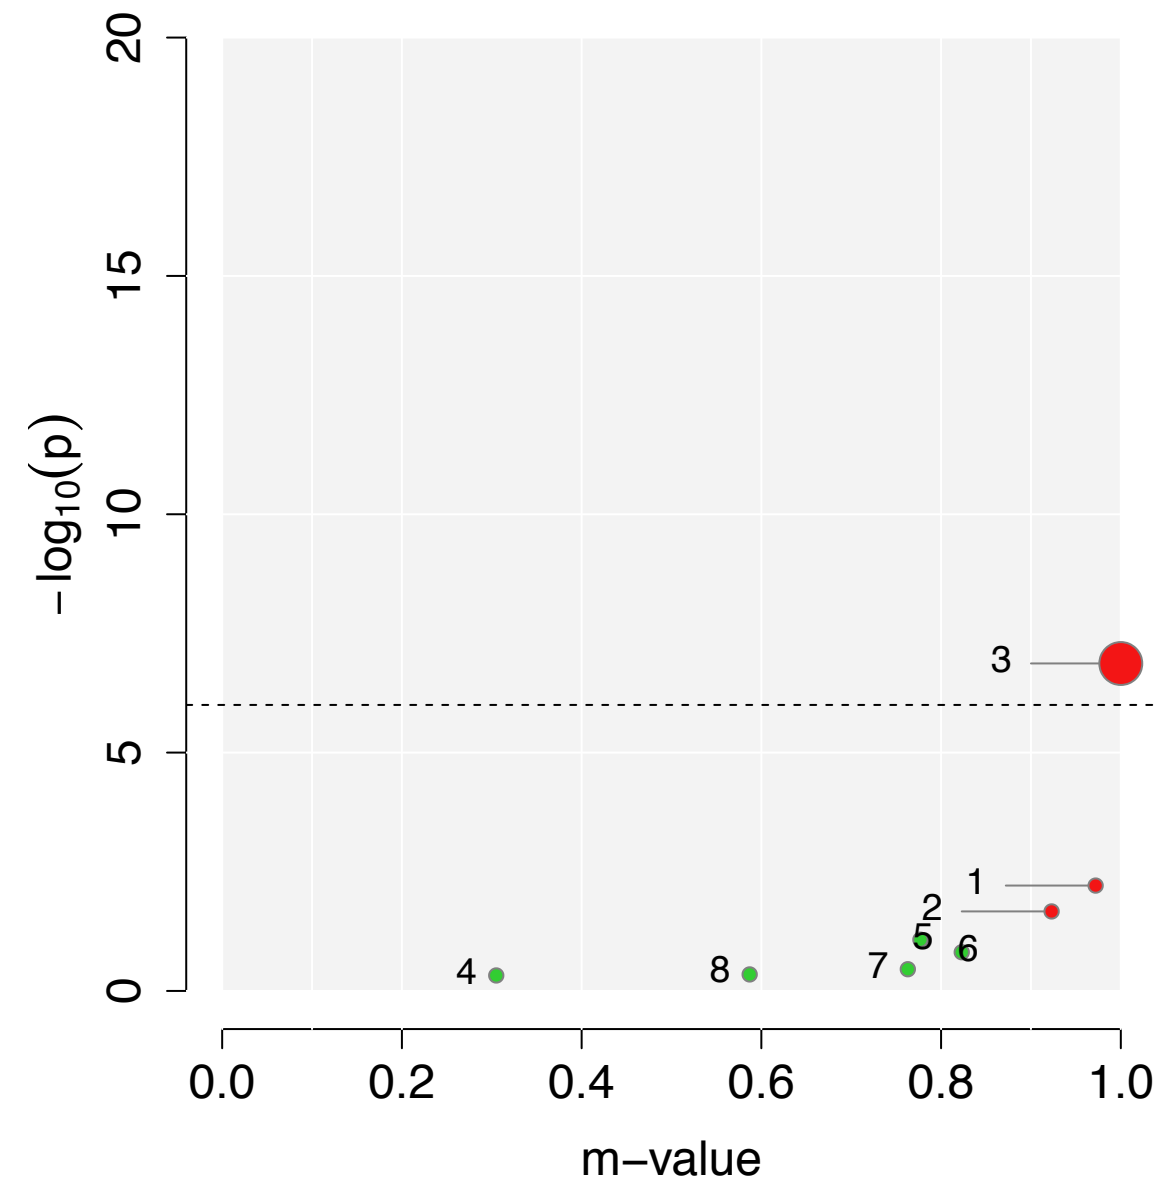



# rs4244354 (Meta $P = 2.27 \times 10^{-9}$ )

Gene : *ARL3*, *TRIM8*

## GWAS P-value

- 1.74 x 10<sup>-9</sup> ● 1.SCZ
- 4.75 x 10<sup>-5</sup> ● 2.BIP
- 0.0061 ● 3.MD
- 0.1385 ● 4.ASD
- 0.6156 ● 5.ADHD
- 0.6056 ● 6.TS
- 0.4566 ● 7.ANO
- 0.8858 ● 8.OCD

FE summary

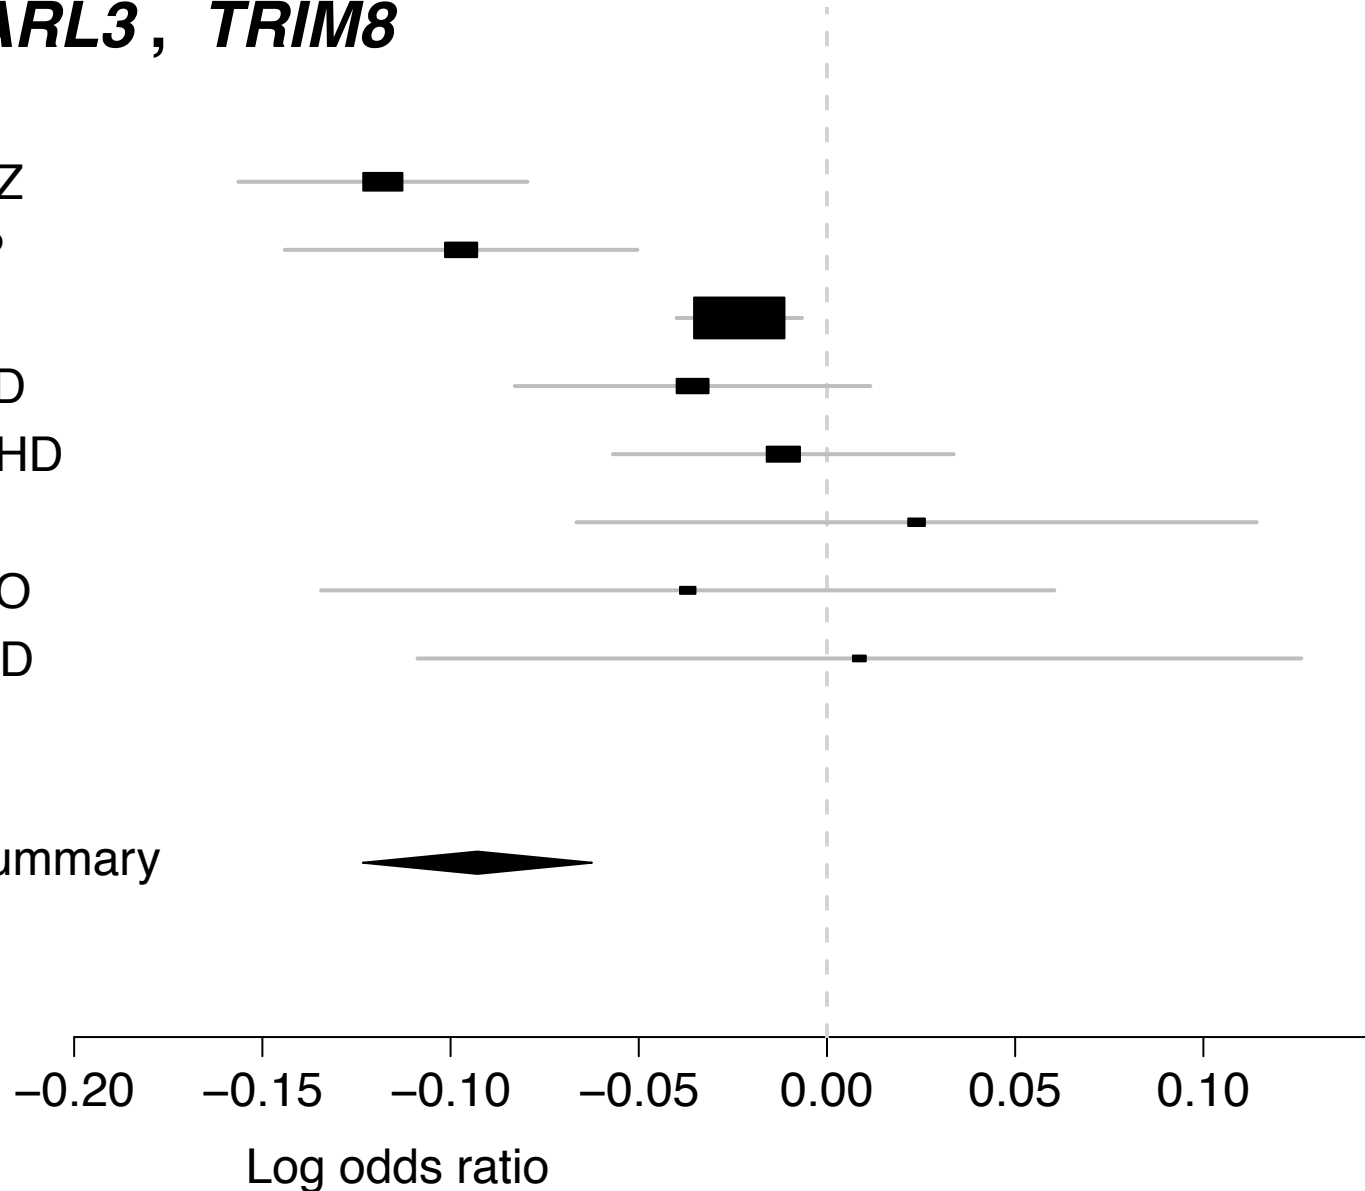

## PM-Plot

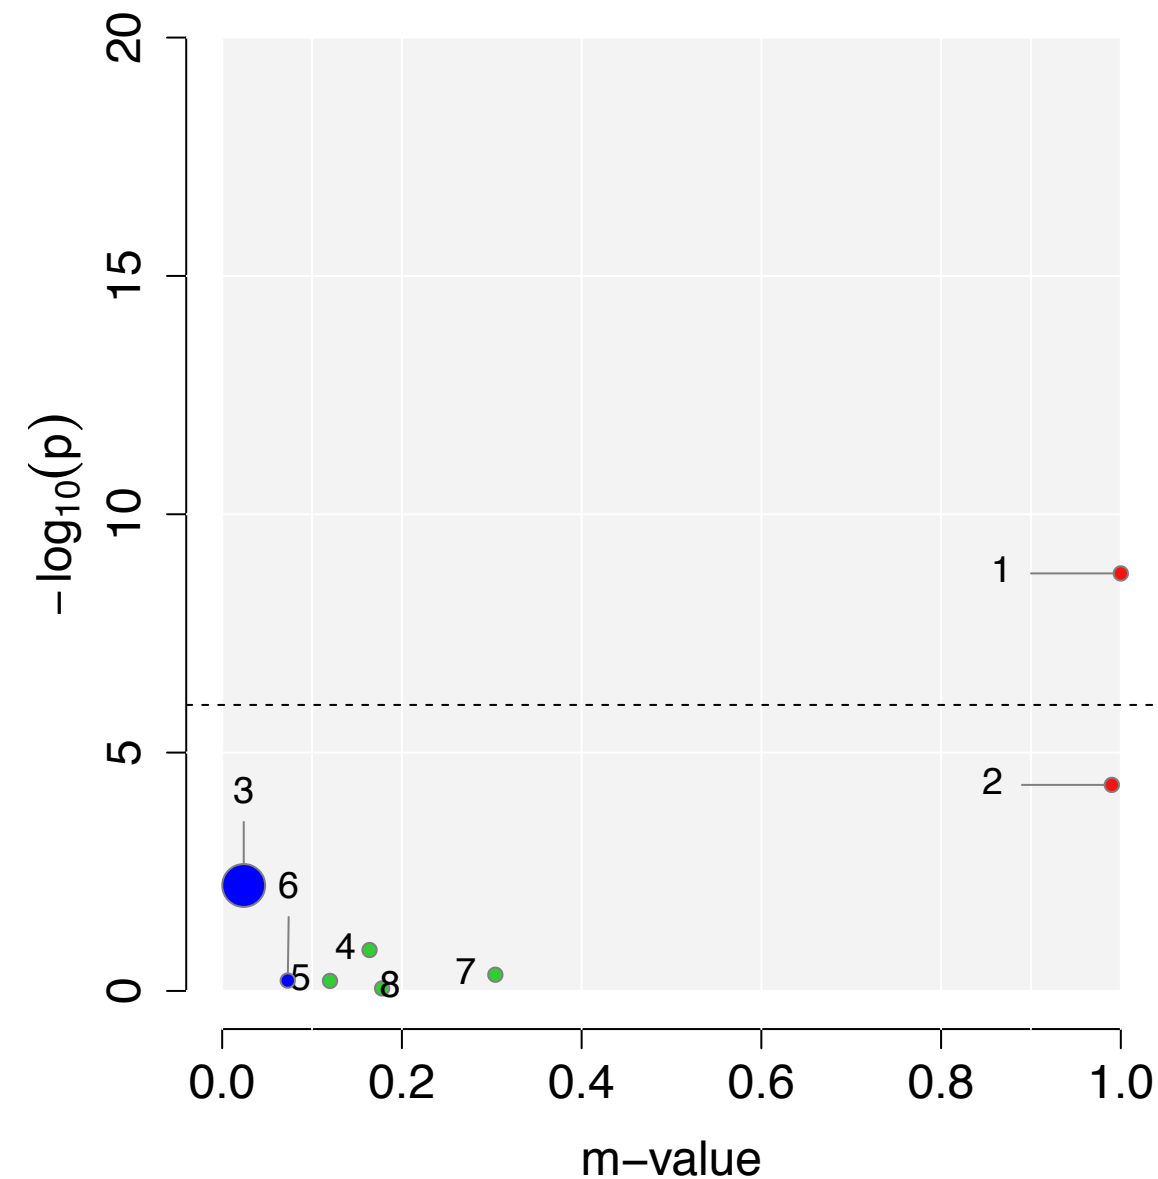

rs4298967 (Meta  $P = 7.91 \times 10^{-20}$ )

Gene : *CACNA1C*

GWAS P-value

- 5.62 x 10<sup>-8</sup> ● 1.SCZ
- 3.46 x 10<sup>-9</sup> ● 2.BIP
- 0.0030 ● 3.MD
- 0.1400 ● 4.ASD
- 0.6098 ● 5.ADHD
- 0.1144 ● 6.TS
- 0.3812 ● 7.ANO
- 0.2051 ● 8.OCD

FE summary

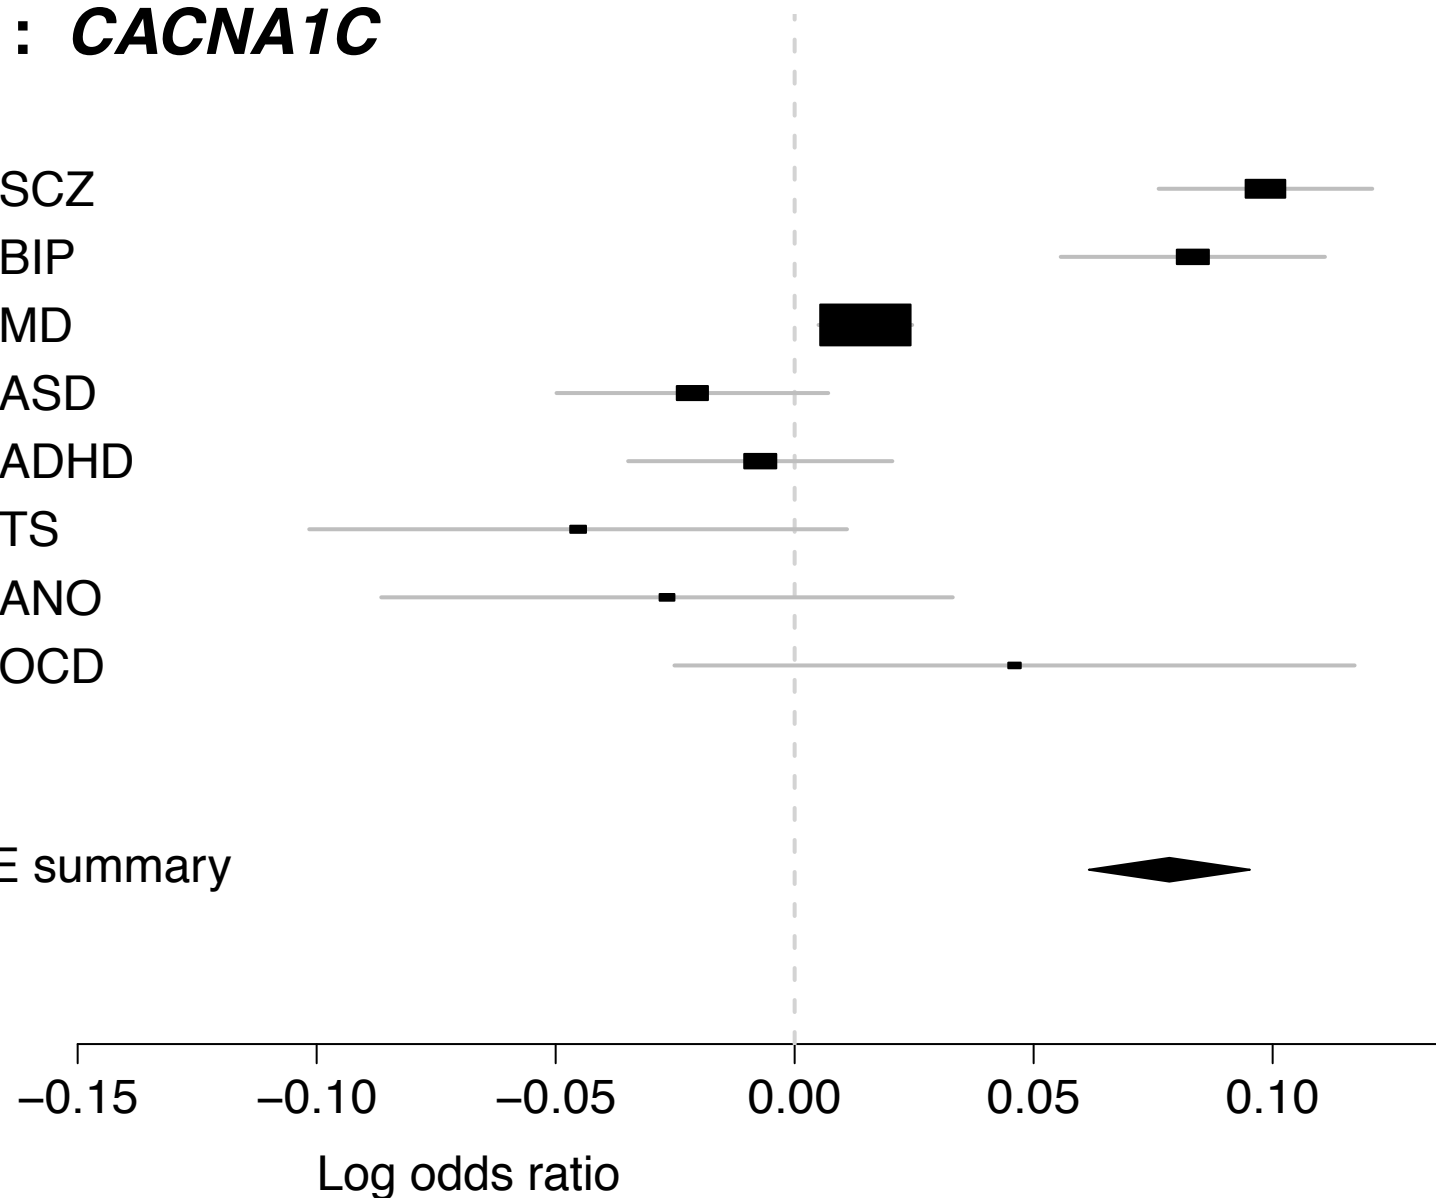

PM-Plot

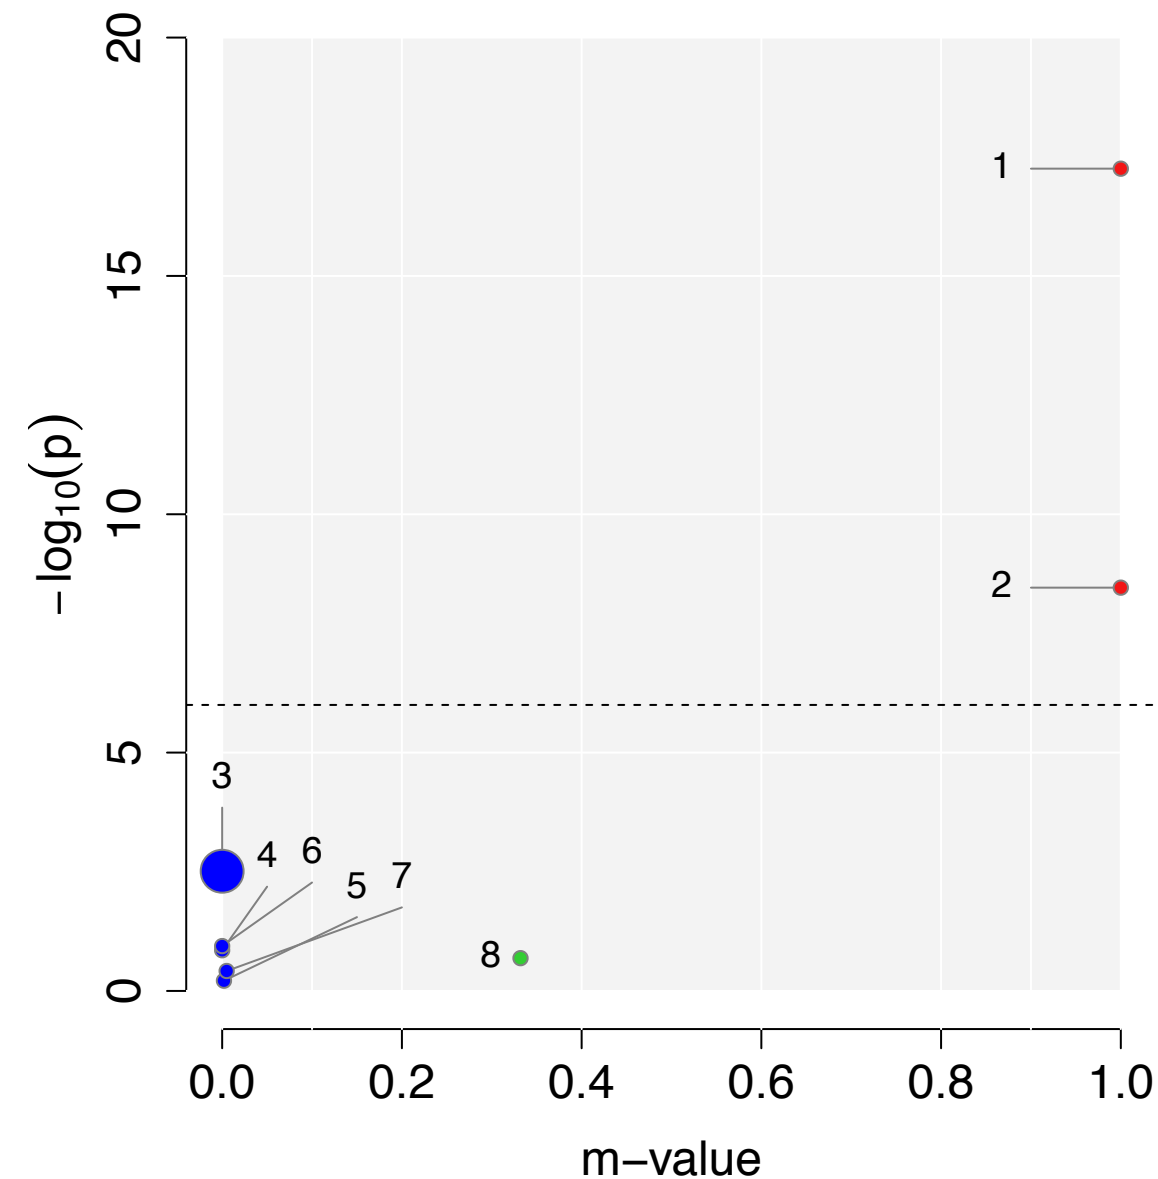

# rs4380187 (Meta $P = 8.48 \times 10^{-12}$ )

Gene : *ZNF804A*

## GWAS P-value

- 2.26 x 10<sup>-11</sup> ● 1.SCZ
- 1.15 x 10<sup>-5</sup> ● 2.BIP
- 0.1629 ● 3.MD
- 0.0470 ● 4.ASD
- 0.1590 ● 5.ADHD
- 0.3724 ● 6.TS
- 0.3189 ● 7.ANO
- 0.1137 ● 8.OCD

FE summary

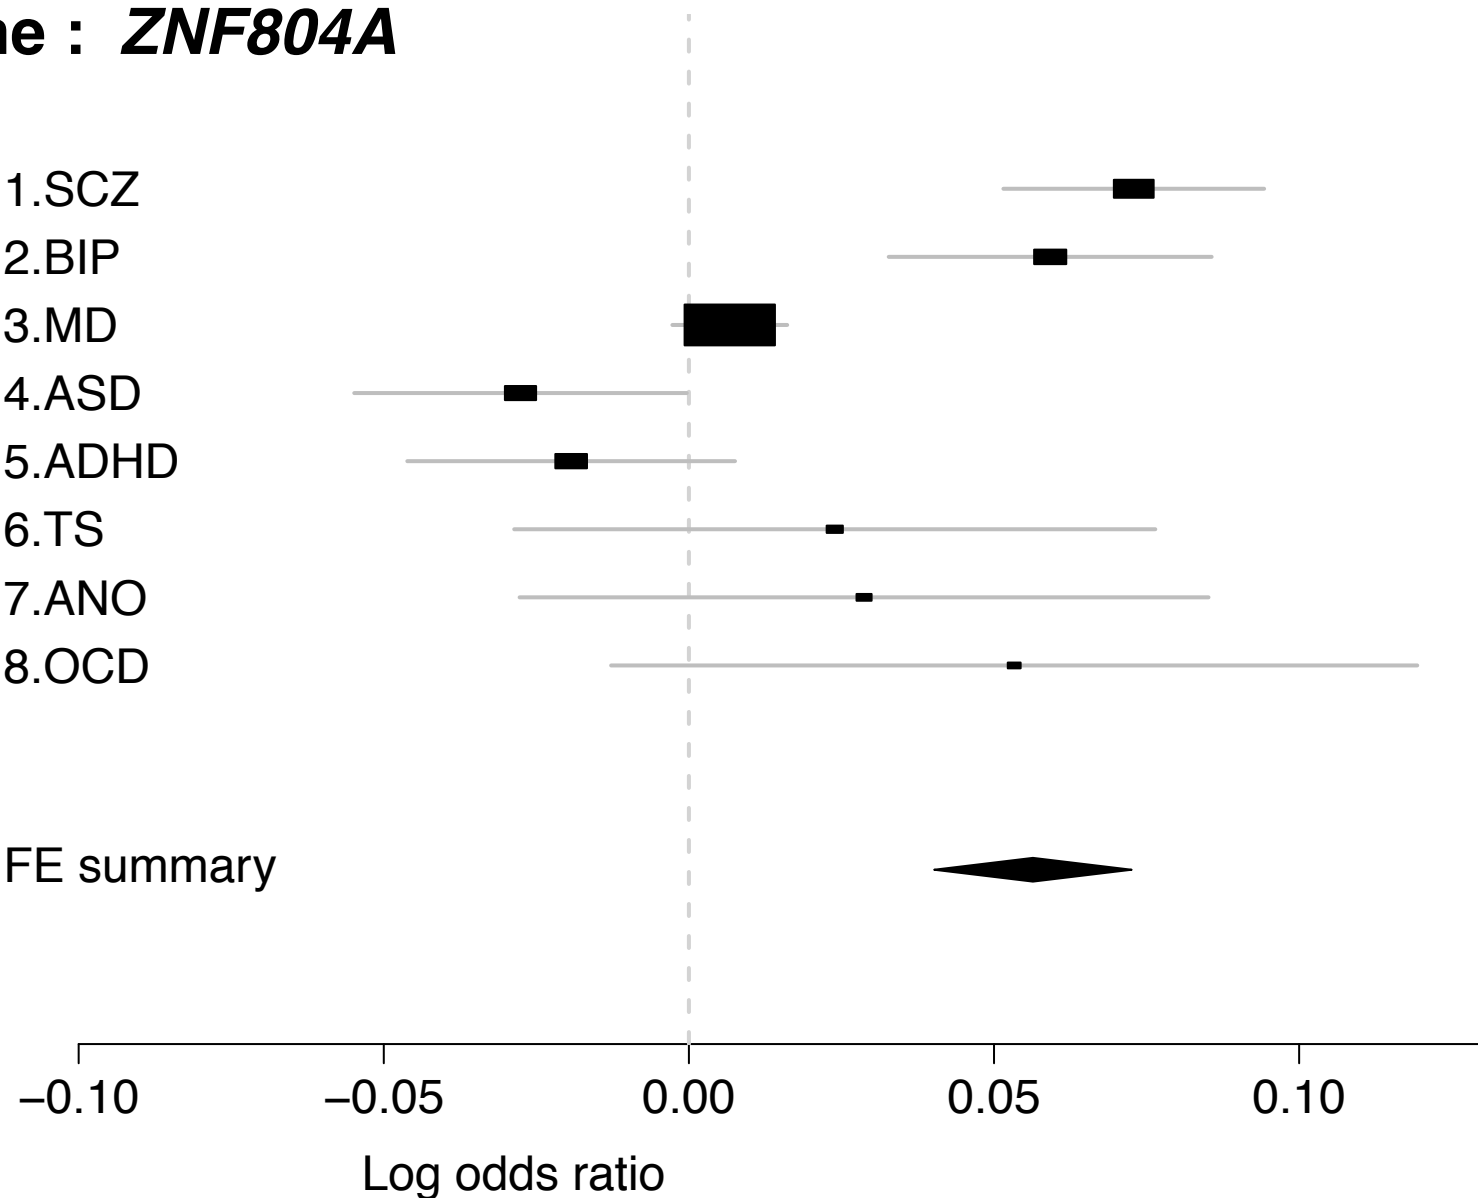

## PM-Plot

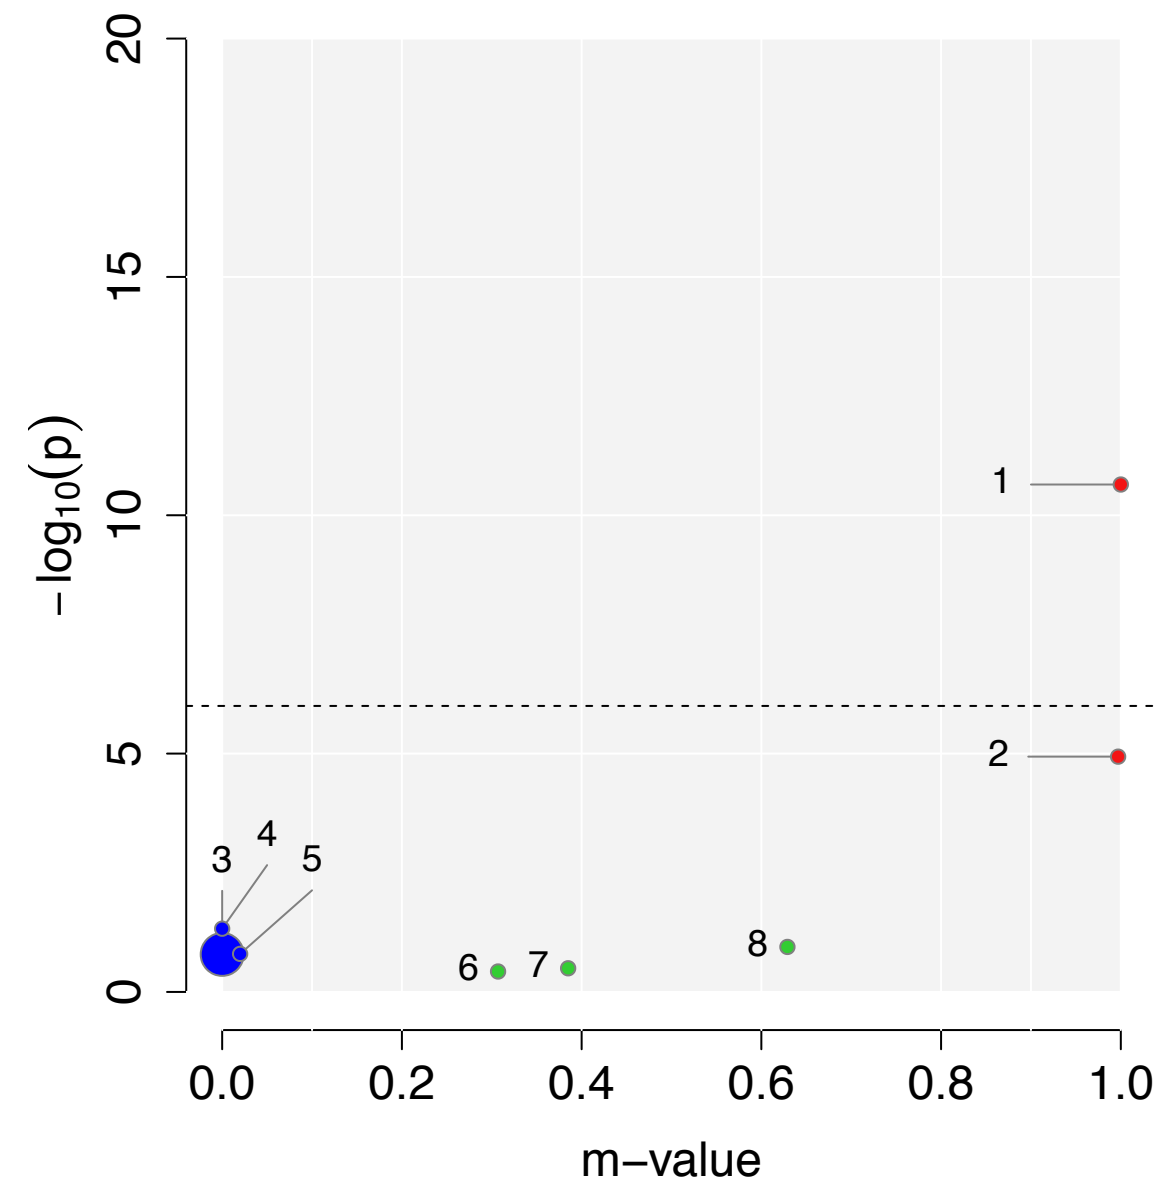

rs4391122 (Meta  $P = 9.6e \times 10^{-11}$ )

Gene : **ZSWIM6**

GWAS P-value

- 8.28 x 10<sup>-3</sup> ● 1.SCZ
- 0.0084 ● 2.BIP
- 0.7234 ● 3.MD
- 0.0309 ● 4.ASD
- 0.9055 ● 5.ADHD
- 0.4379 ● 6.TS
- 0.9264 ● 7.ANO
- 0.9096 ● 8.OCD

FE summary

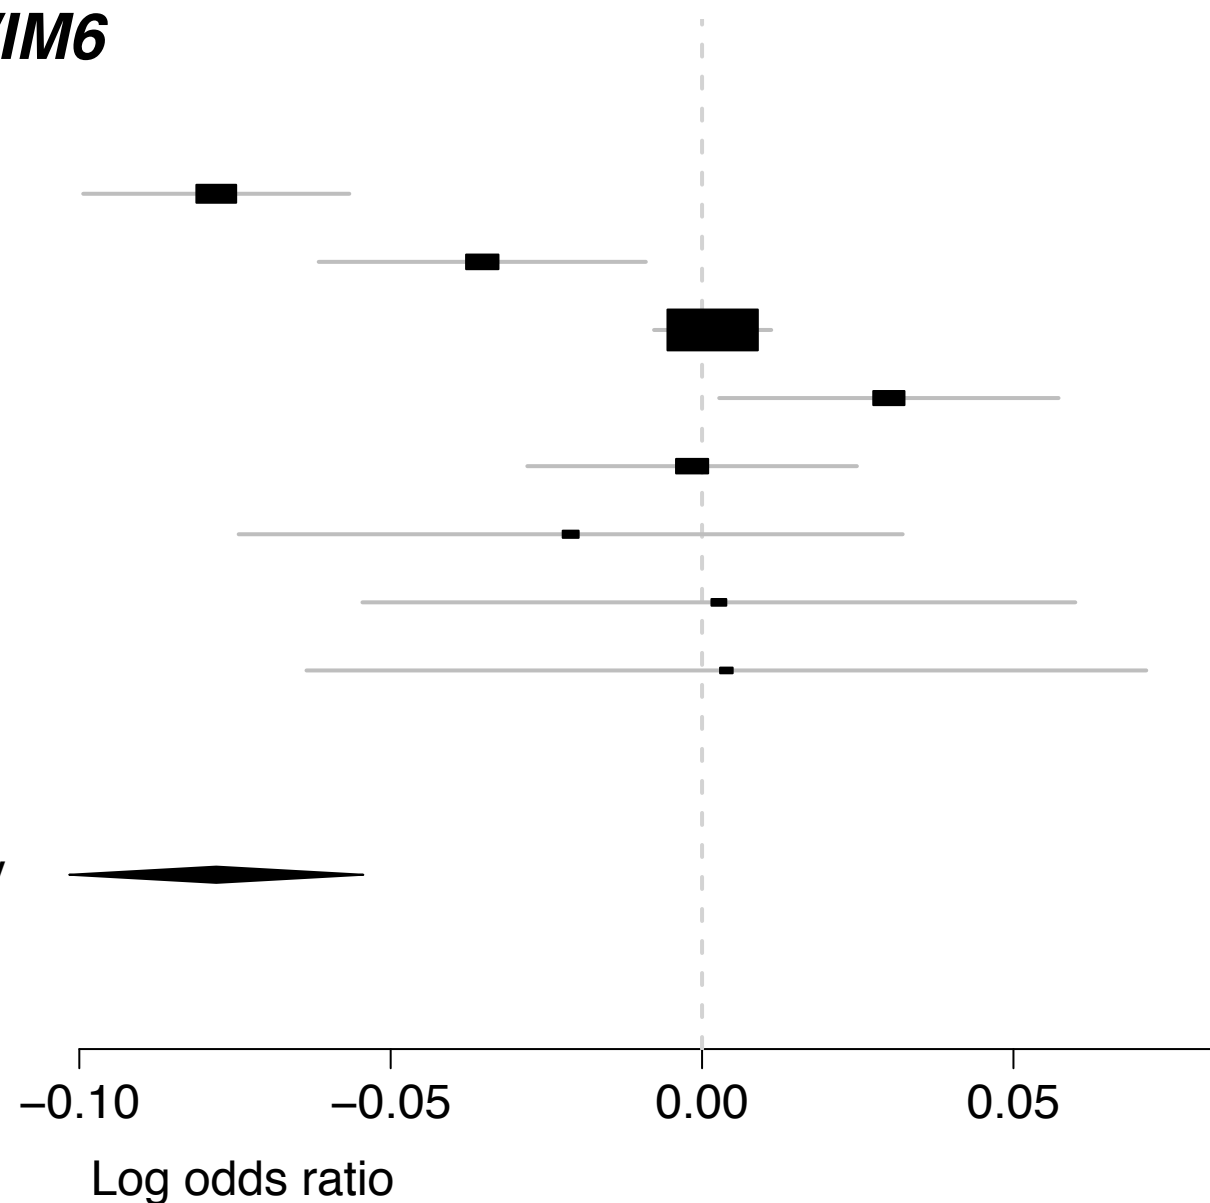

PM-Plot

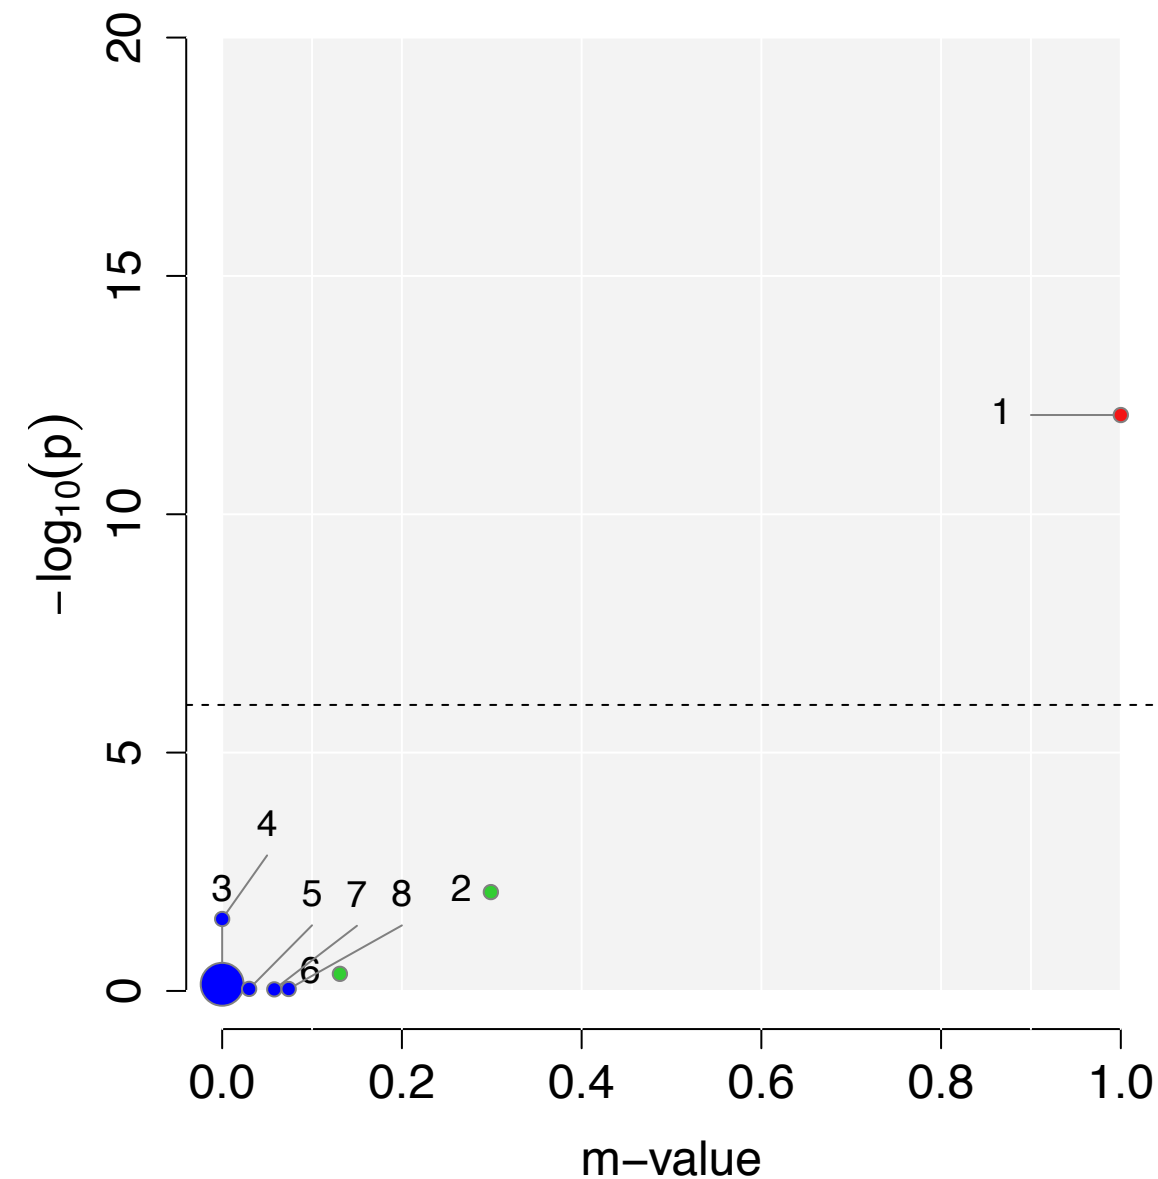

rs4481150 (Meta  $P = 4.79 \times 10^{-17}$ )

Gene : *ITIH3*, *ITIH4*

GWAS P-value

- 1.12 x 10<sup>-10</sup> ● 1.SCZ
- 1.17 x 10<sup>-8</sup> ● 2.BIP
- 0.0139 ● 3.MD
- 0.0001 ● 4.ASD
- 0.8474 ● 5.ADHD
- 0.0514 ● 6.TS
- 0.1570 ● 7.ANO
- 0.0508 ● 8.OCD

FE summary

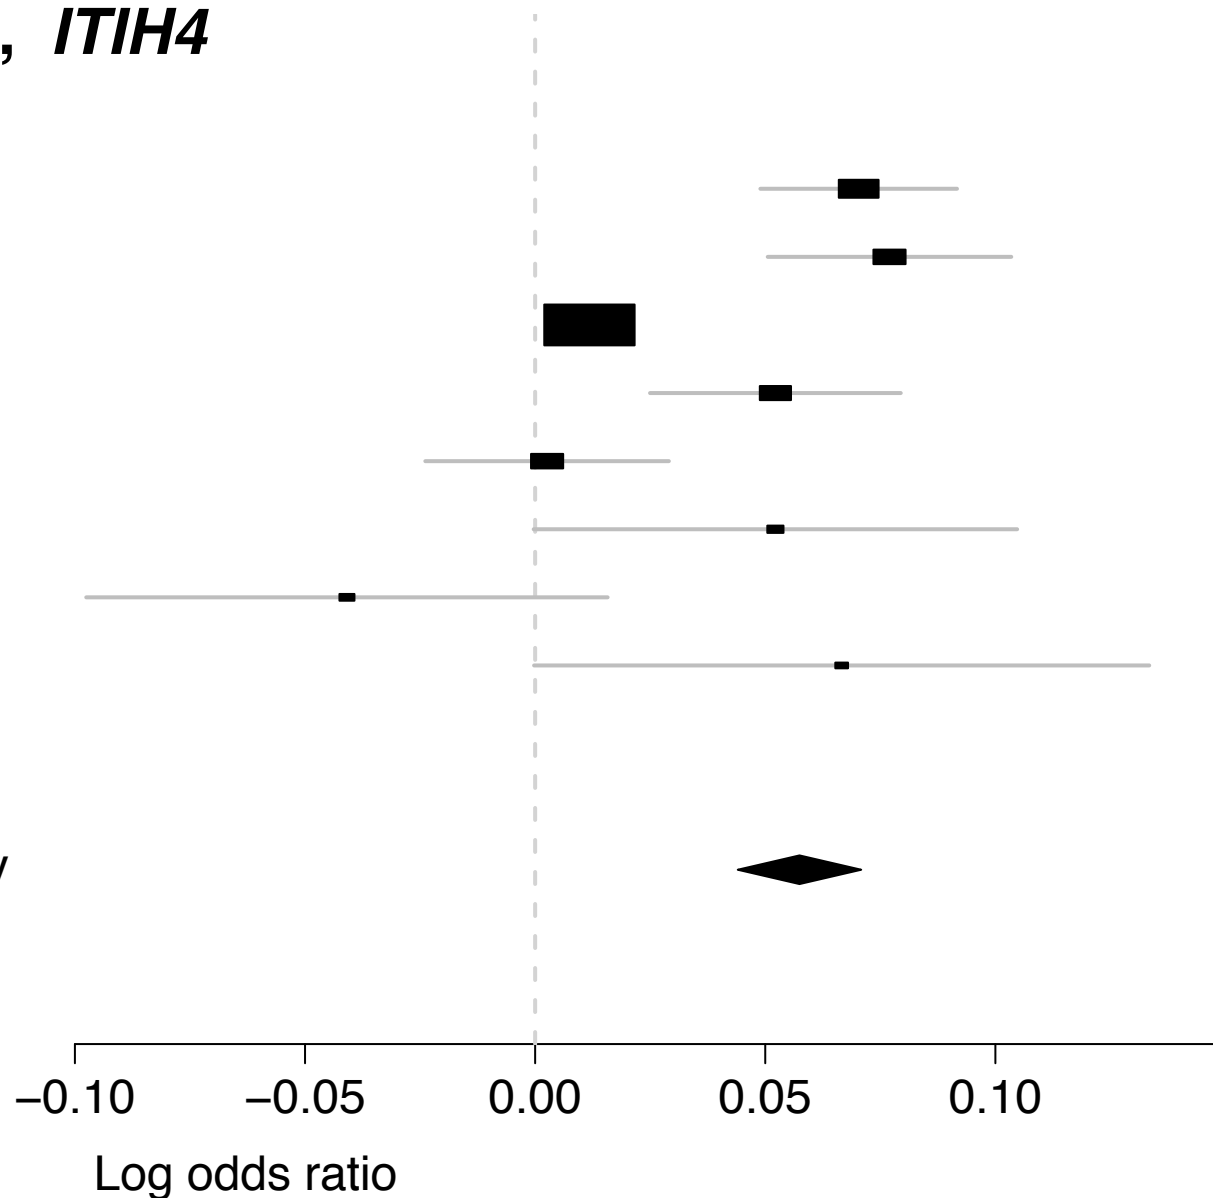

PM-Plot

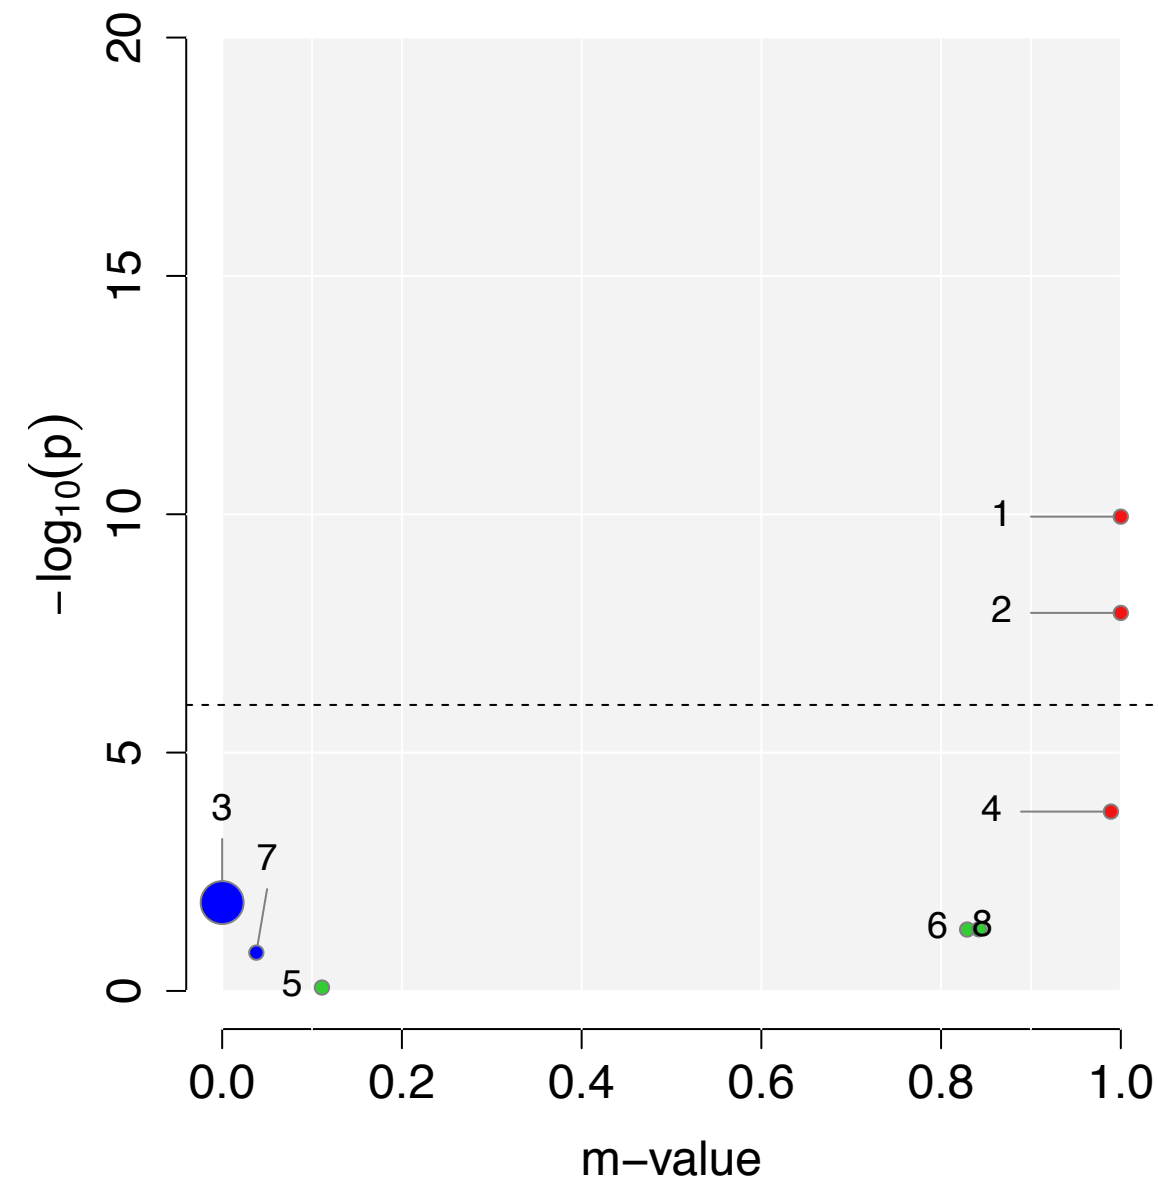

# rs4495234 (Meta $P = 3.74 \times 10^{-8}$ )

Gene : *PPP2R2B*

## GWAS P-value

- $8.77 \times 10^{-6}$  ● 1.SCZ
- $9.39 \times 10^{-5}$  ● 2.BIP
- 0.4893 ● 3.MD
- 0.0432 ● 4.ASD
- 0.2198 ● 5.ADHD
- 0.0142 ● 6.TS
- 0.3499 ● 7.ANO
- 0.0291 ● 8.OCD

FE summary

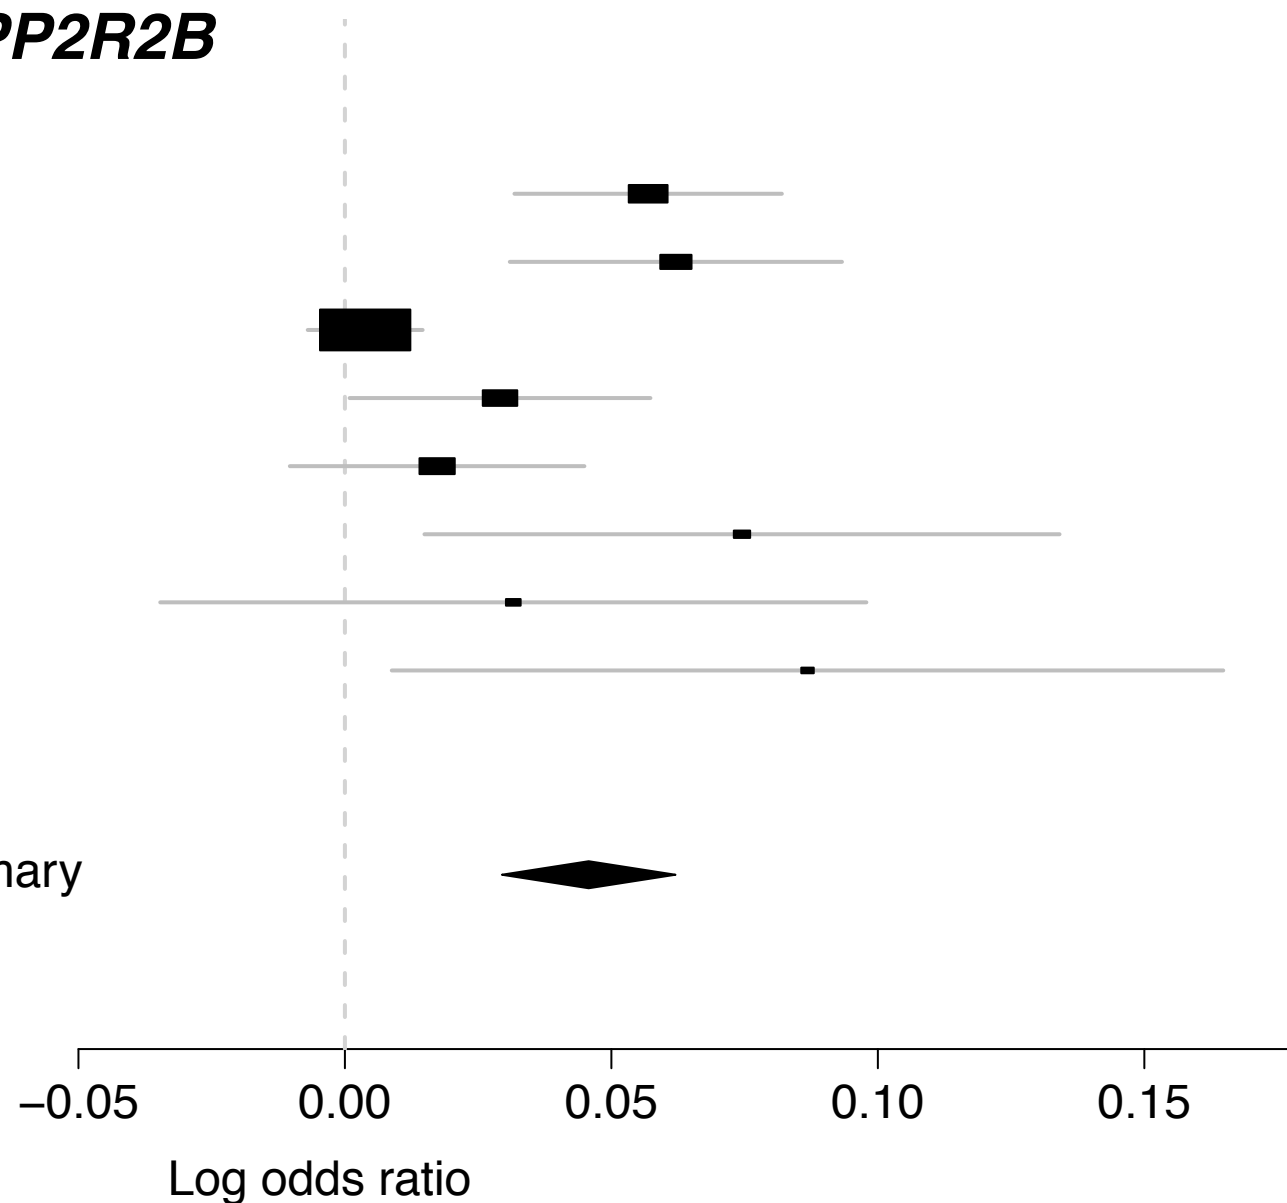

## PM-Plot

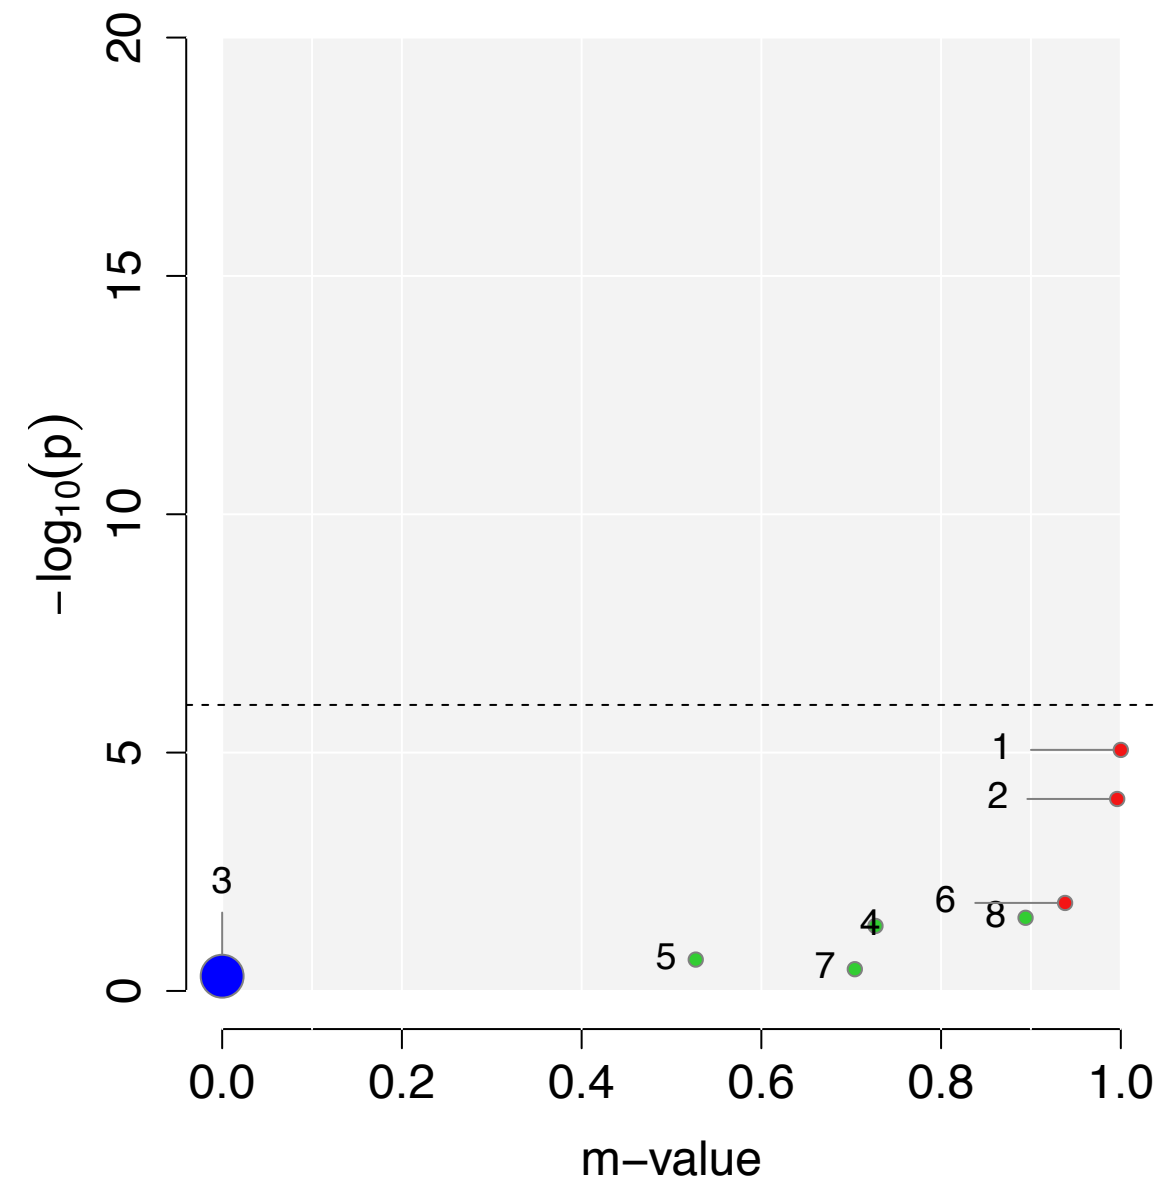

# rs4526442 (Meta $P = 4.1e \times 10^{-8}$ )

Gene : *ZCCHC7*

## GWAS P-value

- 0.4531 ● 1.SCZ
- 0.0006 ● 2.BIP
- $7.03 \times 10^{-8}$  ● 3.MD
- 0.1350 ● 4.ASD
- 0.3091 ● 5.ADHD
- 0.1914 ● 6.TS
- 0.8222 ● 7.ANO
- 0.6938 ● 8.OCD

FE summary

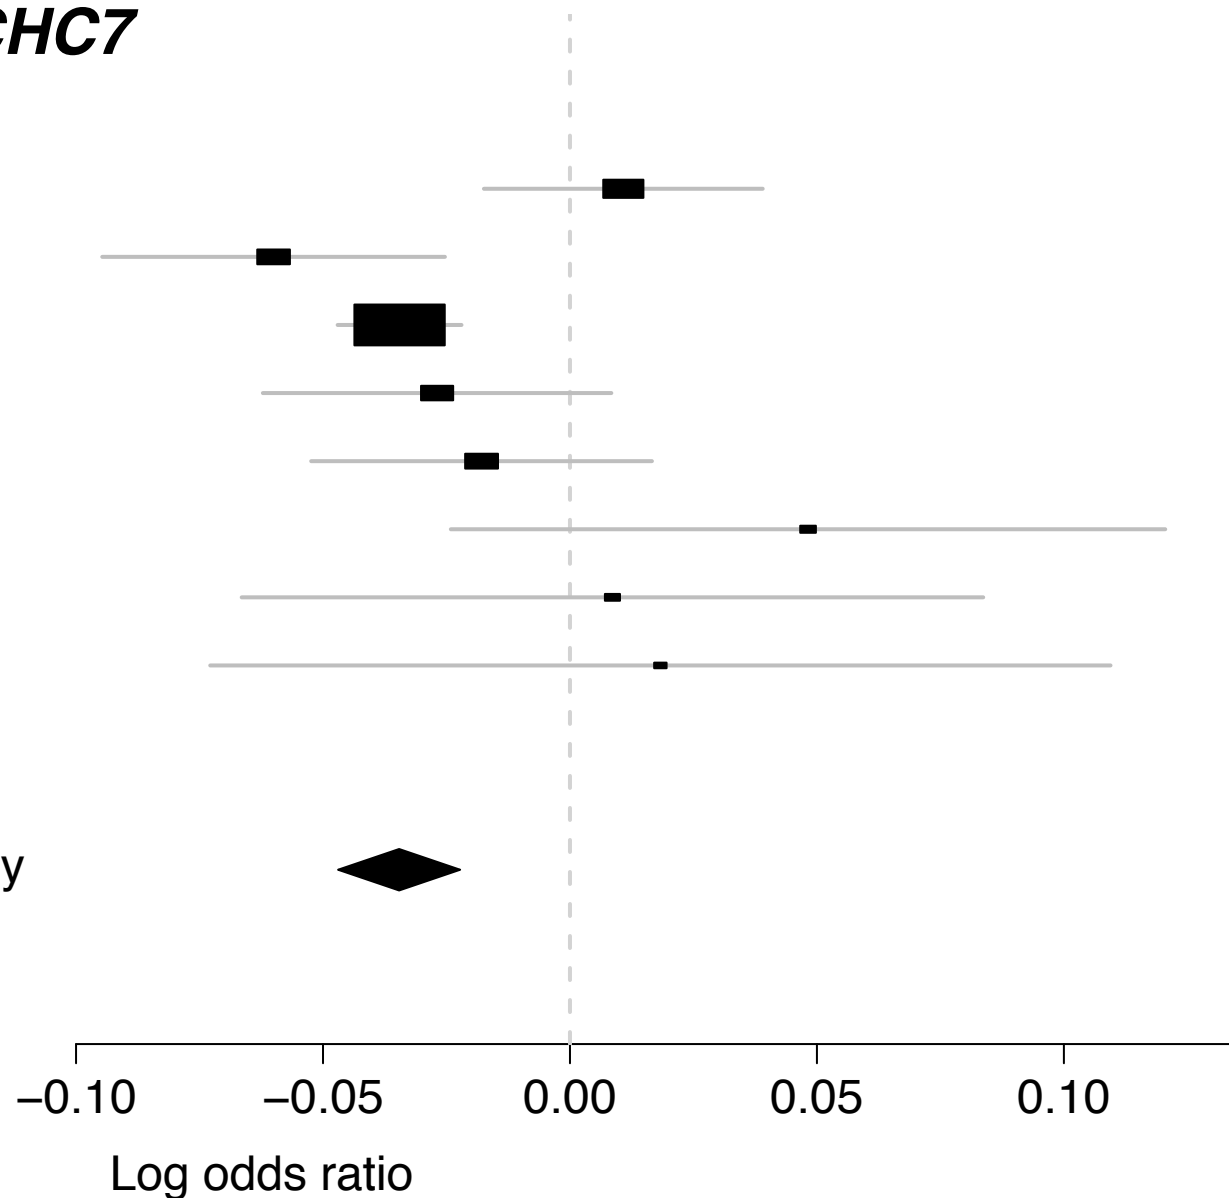

## PM-Plot

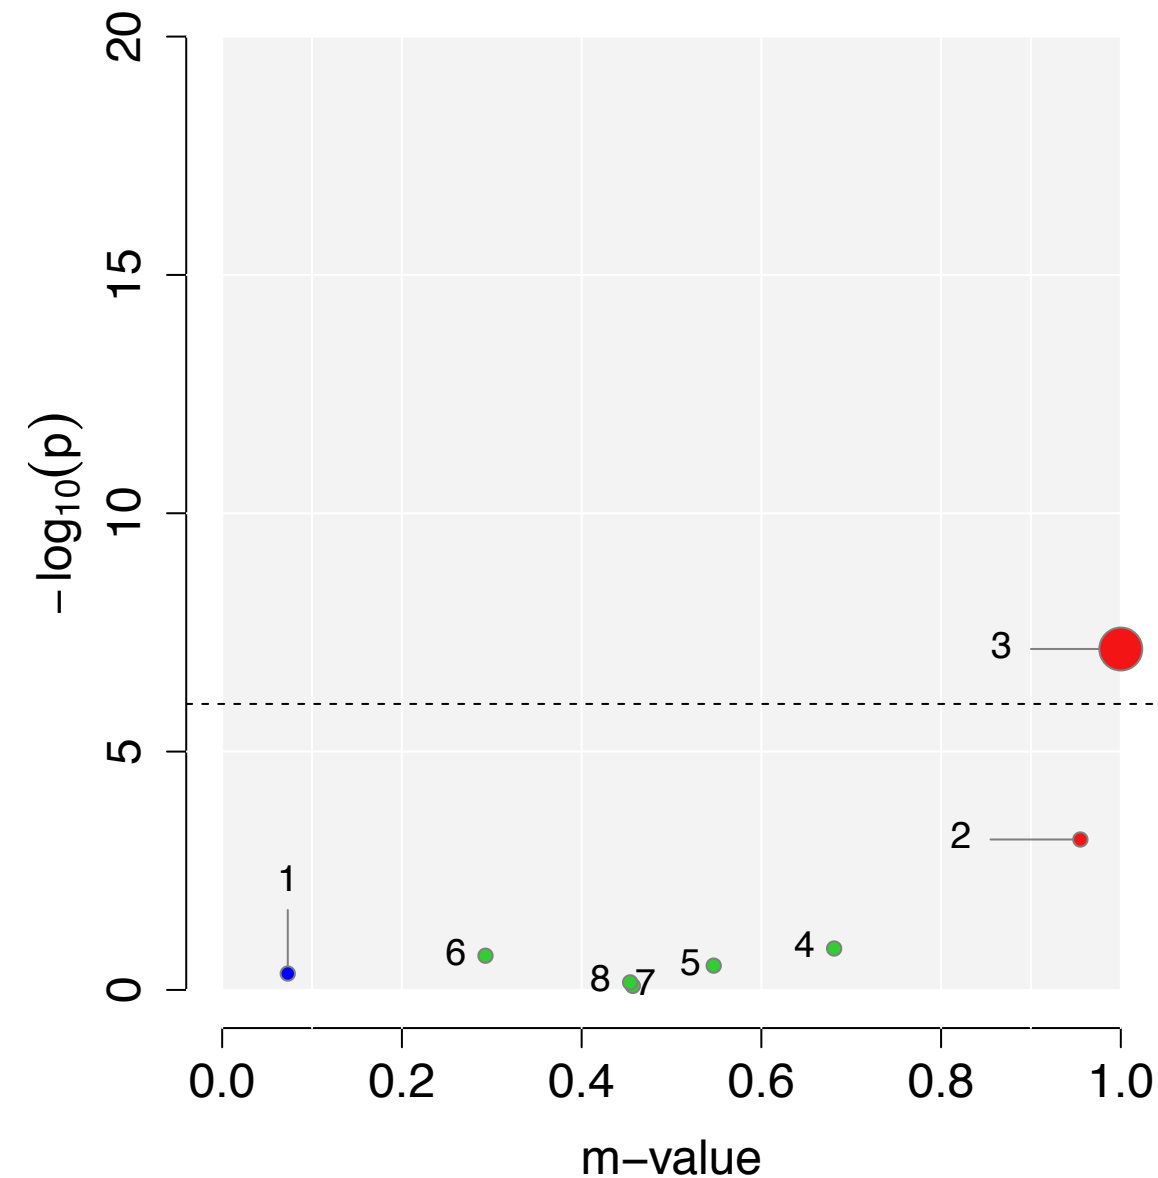

# rs4619651 (Meta $P = 1.47 \times 10^{-9}$ )

Gene : *LMAN2L*, *CNNM4*

## GWAS P-value

- 1.50 x 10<sup>-6</sup> ● 1.SCZ
- 5.21 x 10<sup>-9</sup> ● 2.BIP
- 0.2044 ● 3.MD
- 0.0751 ● 4.ASD
- 0.3631 ● 5.ADHD
- 0.6916 ● 6.TS
- 0.5237 ● 7.ANO
- 0.9802 ● 8.OCD

FE summary

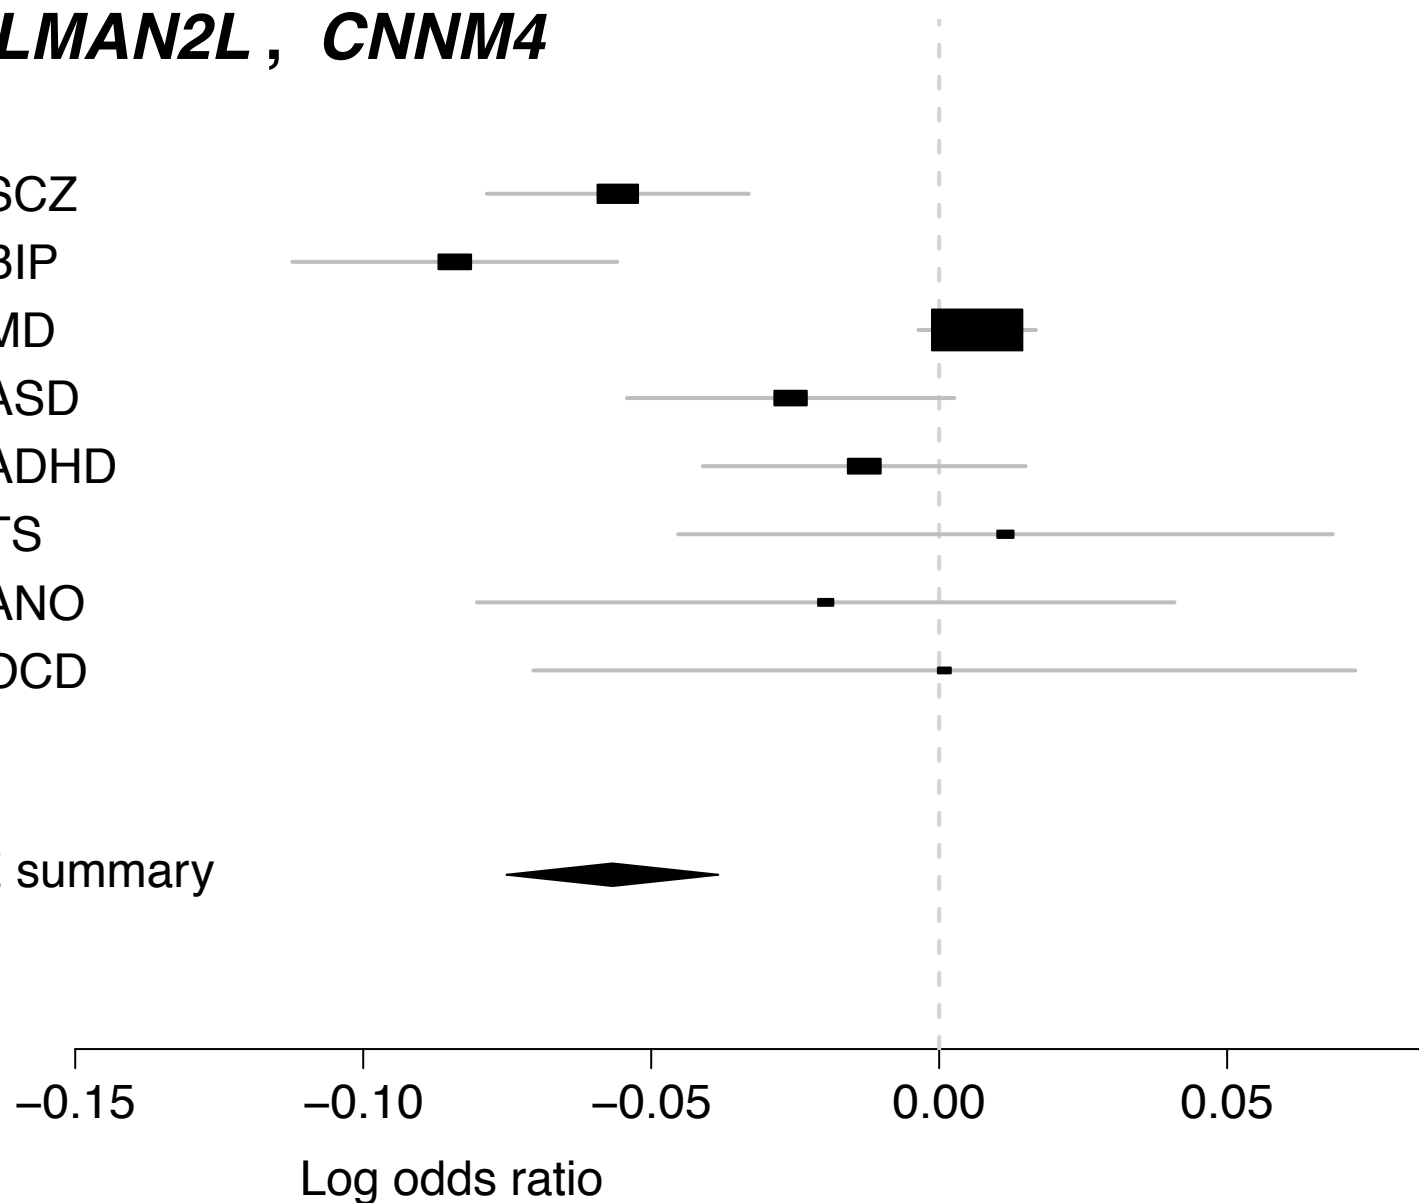

## PM-Plot

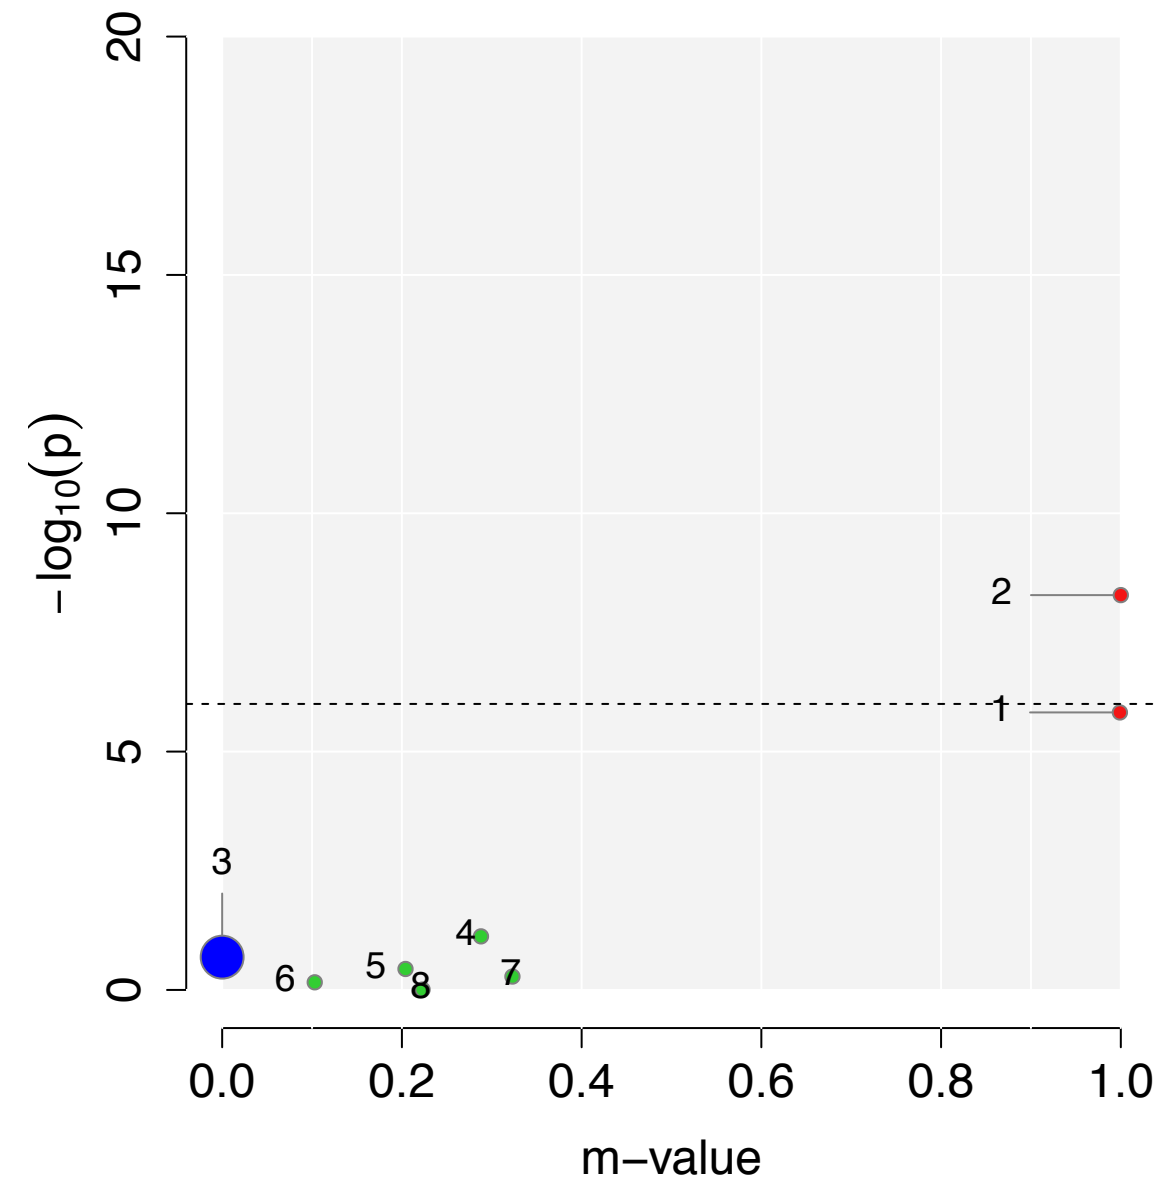



# rs4647903 (Meta $P = 1.69 \times 10^{-9}$ )

Gene : *FGFR1*, *LETM2*

## GWAS P-value

- 1.85 x 10<sup>-6</sup> ● 1.SCZ
- 5.15 x 10<sup>-6</sup> ● 2.BIP
- 0.0039 ● 3.MD
- 0.0059 ● 4.ASD
- 0.0220 ● 5.ADHD
- 0.0485 ● 6.TS
- 0.2984 ● 7.ANO
- 0.0855 ● 8.OCD

FE summary

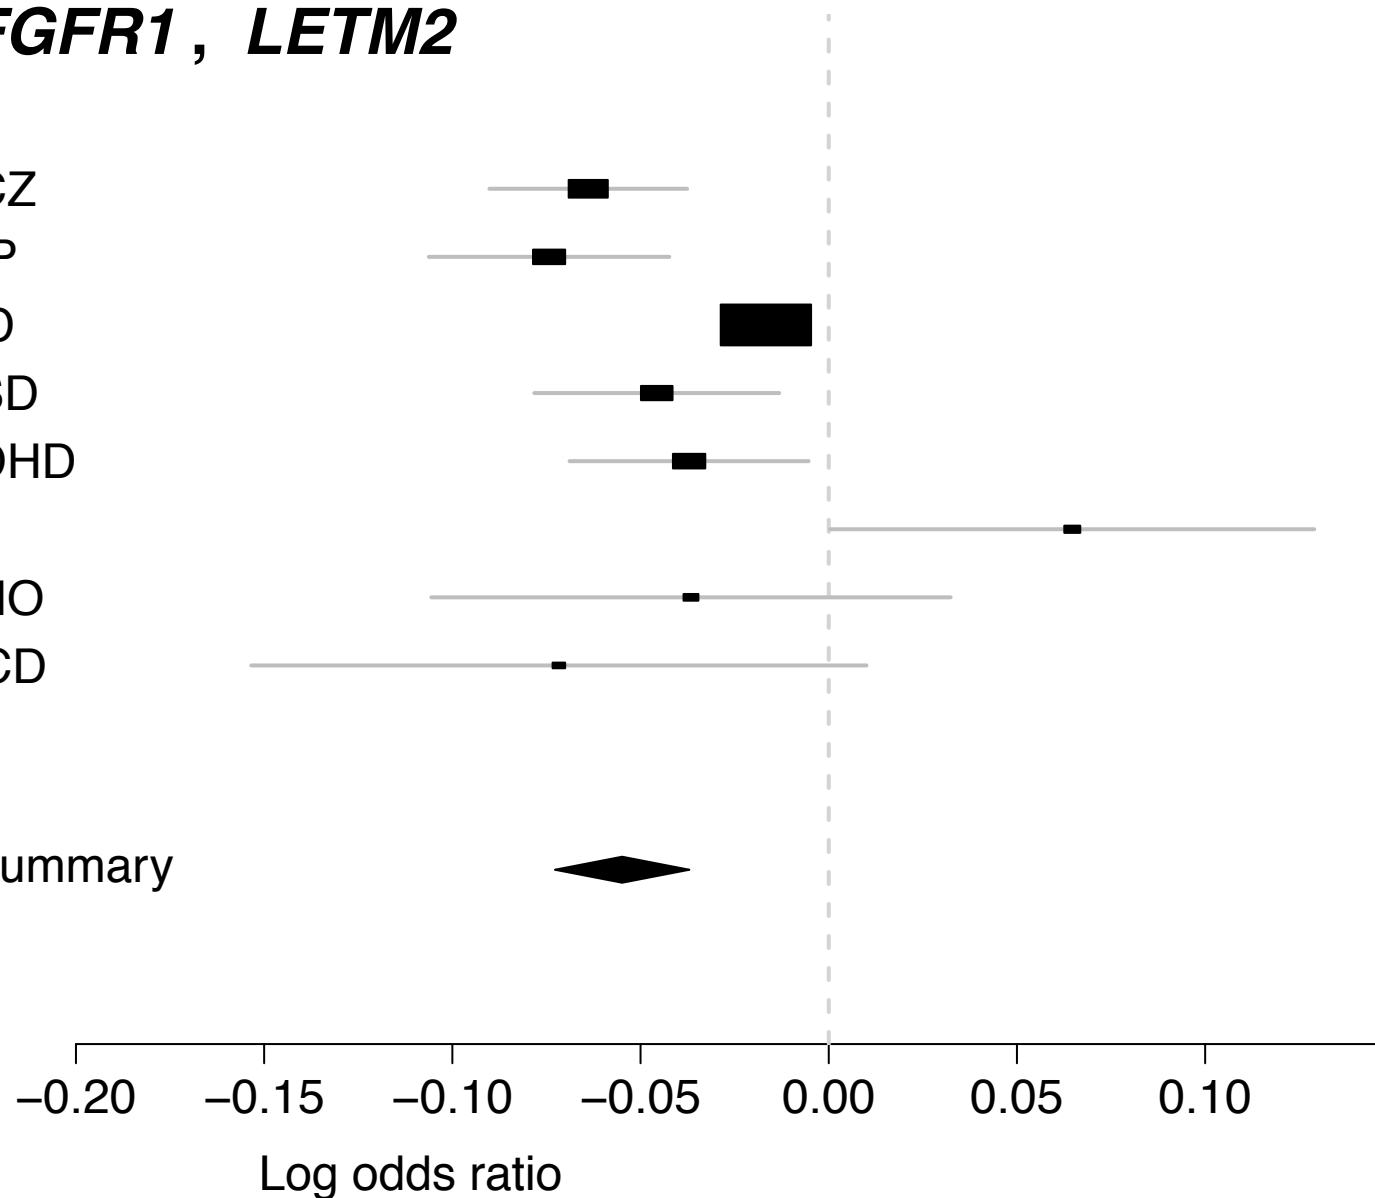

## PM-Plot

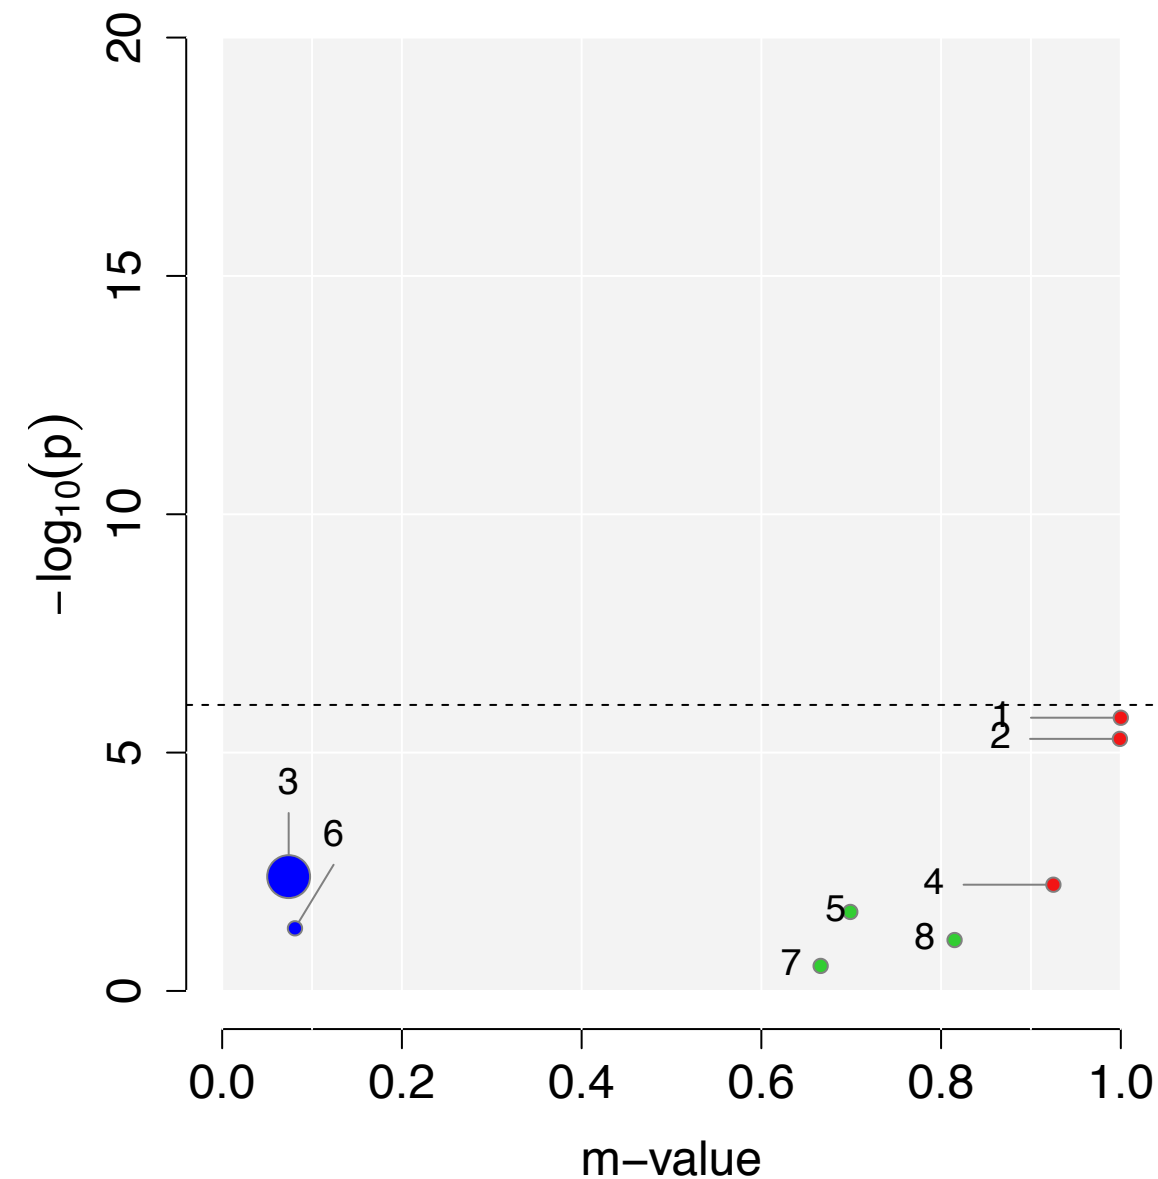

rs4682973 (Meta  $P = 4.06 \times 10^{-8}$ )

Gene : *TCAIM*, *TOPAZ1*

GWAS P-value

- 0.0037 ● 1.SCZ
- 0.5946 ● 2.BIP
- $6.97 \times 10^{-8}$  ● 3.MD
- 0.4668 ● 4.ASD
- 0.1017 ● 5.ADHD
- 0.4495 ● 6.TS
- 0.8147 ● 7.ANO
- 0.0814 ● 8.OCD

FE summary

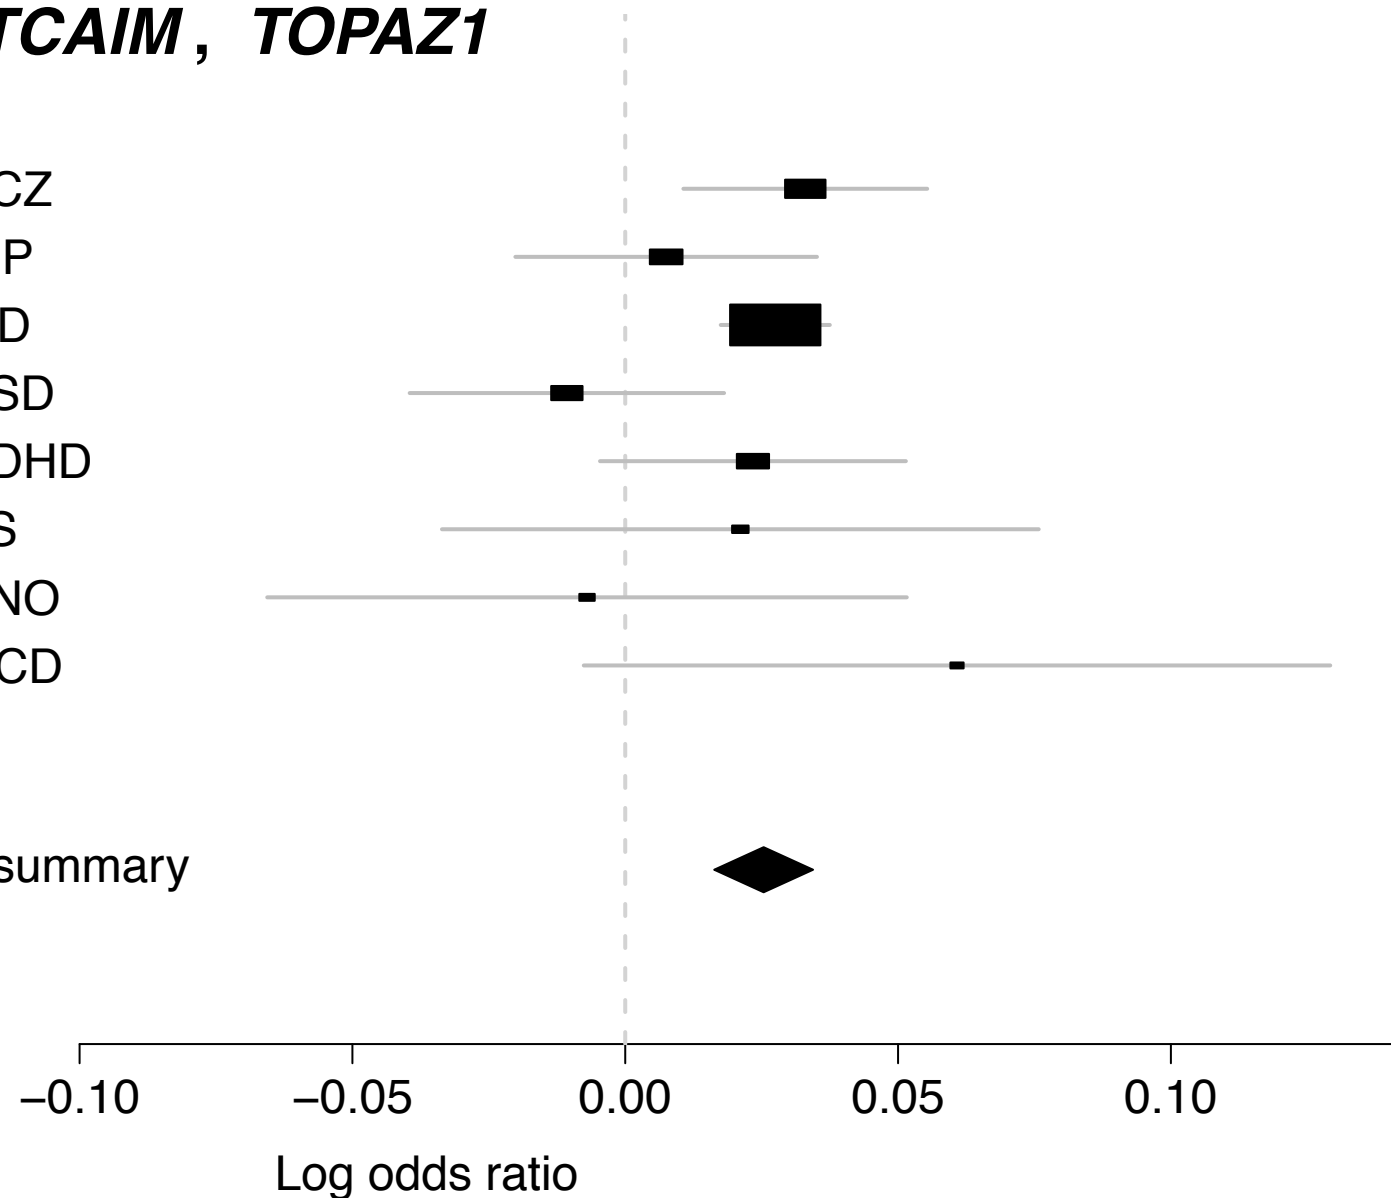

PM-Plot

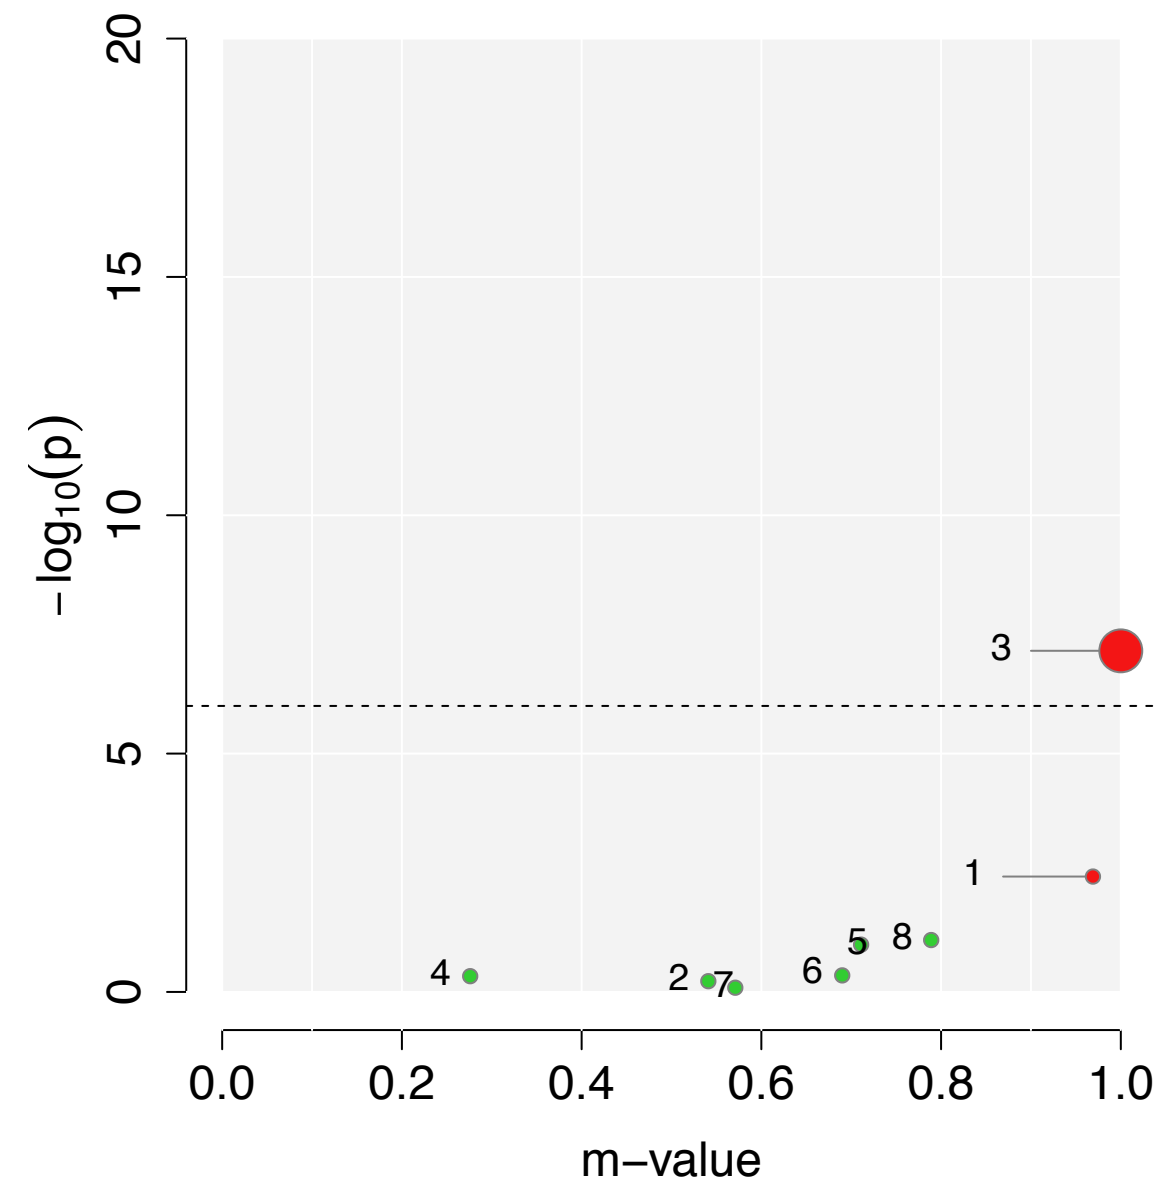

# rs4730387 (Meta $P = 2.73 \times 10^{-8}$ )

Gene : (>200kb)

## GWAS P-value

- 0.0096 ● 1.SCZ
- 0.9174 ● 2.BIP
- $1.01 \times 10^{-8}$  ● 3.MD
- 0.6273 ● 4.ASD
- 0.9825 ● 5.ADHD
- 0.8843 ● 6.TS
- 0.2449 ● 7.ANO
- 0.4233 ● 8.OCD

FE summary

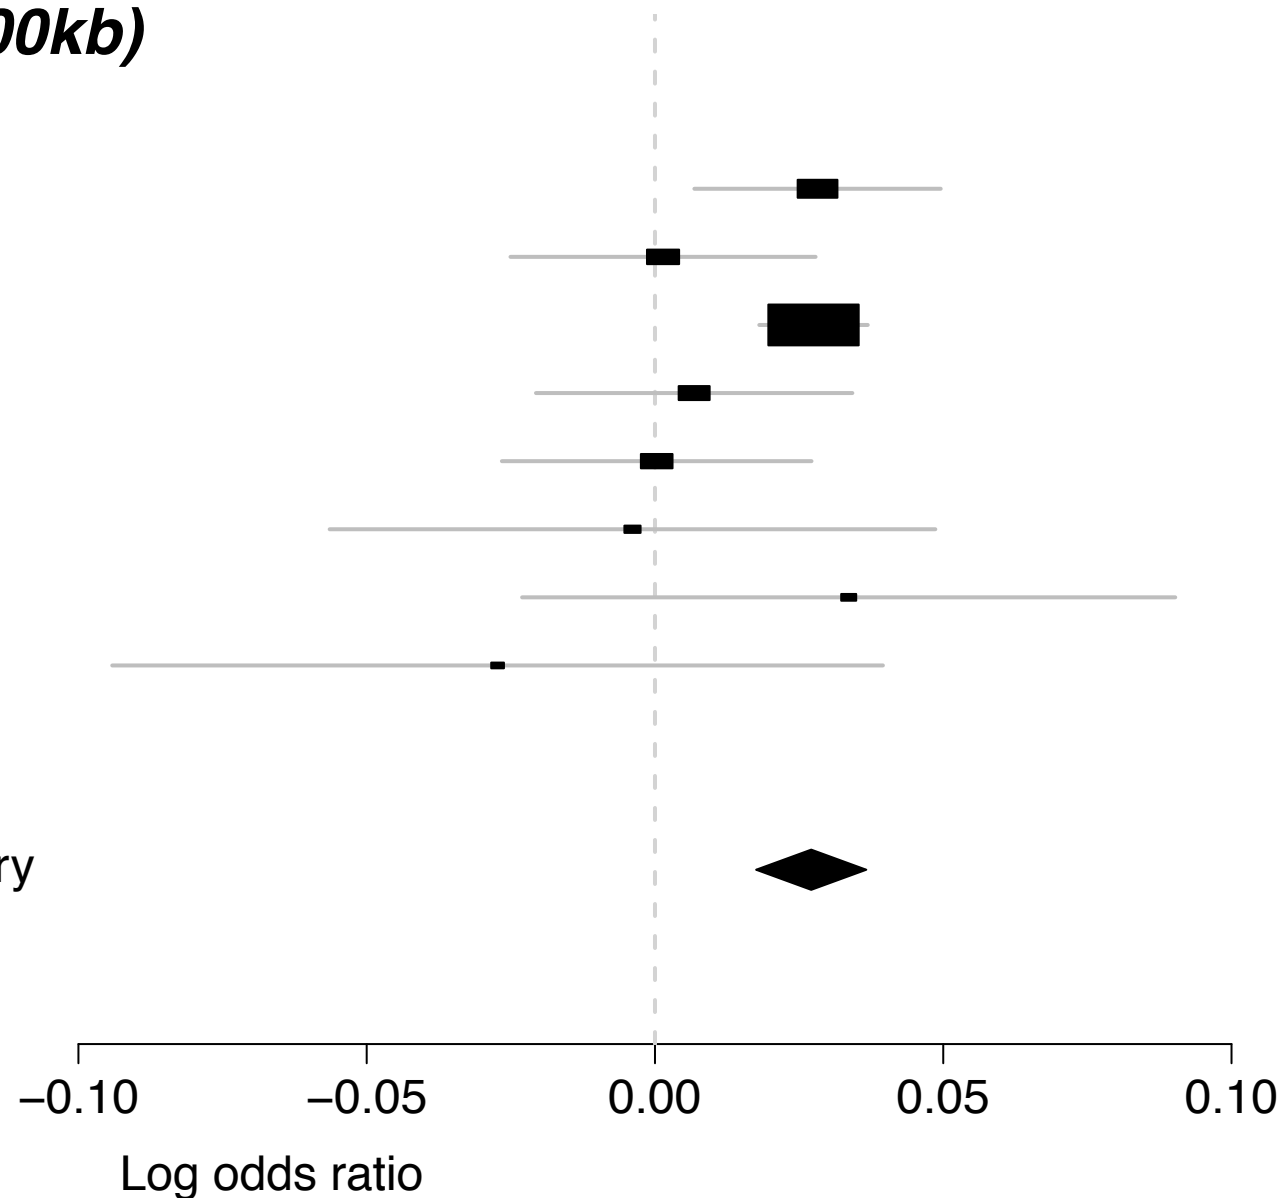

## PM-Plot

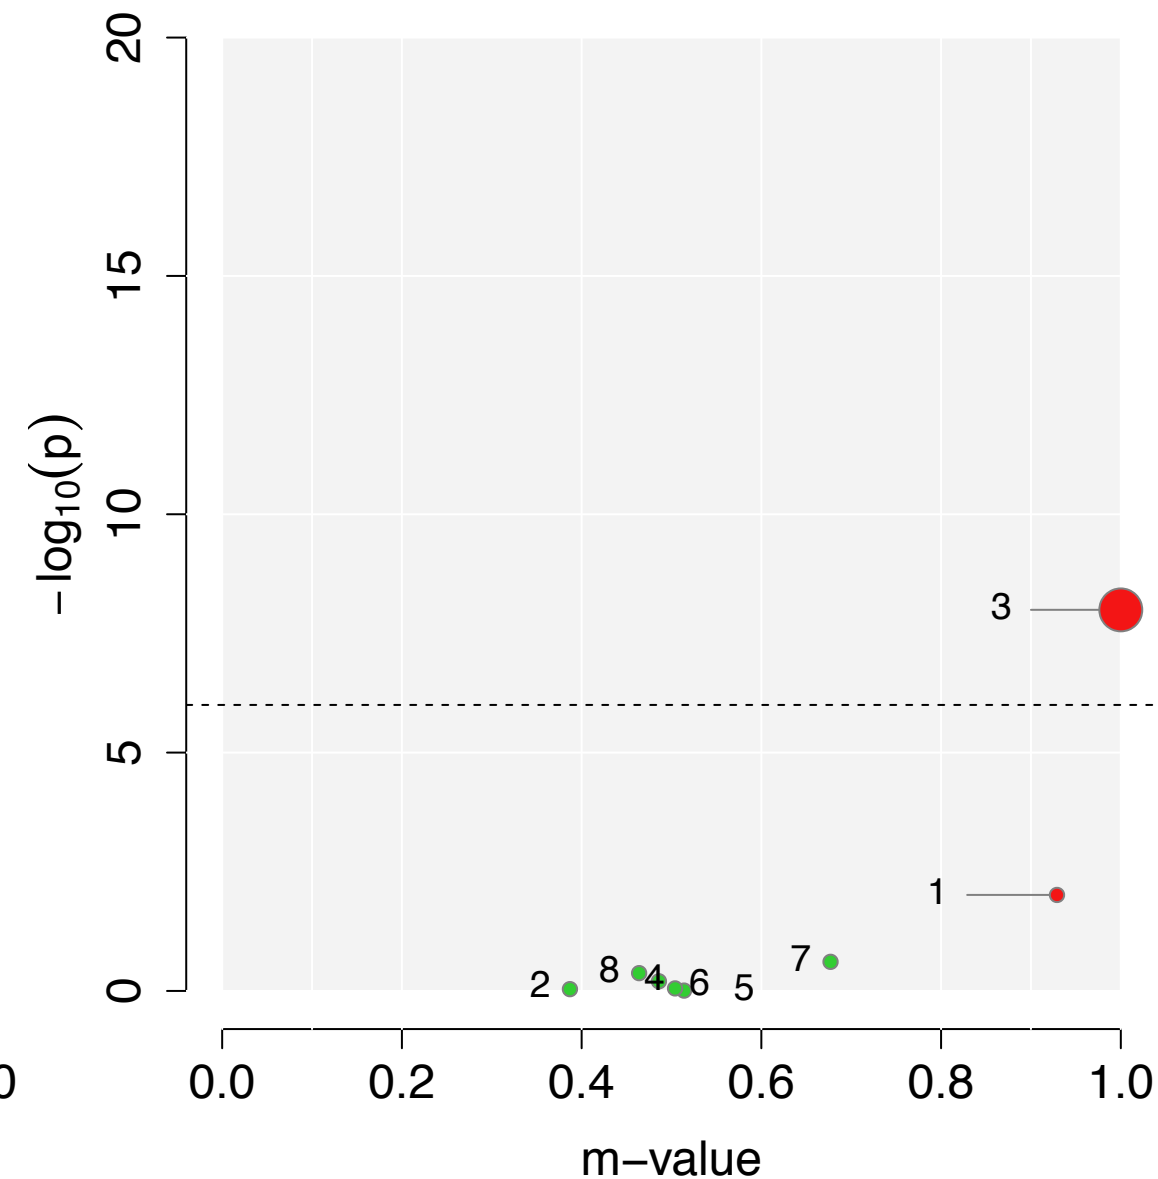

# rs4766428 (Meta $P = 4.55 \times 10^{-8}$ )

Gene : *ATP2A2*, *IFT81*

## GWAS P-value

- 5.79 x 10<sup>-10</sup> ● 1.SCZ
- 0.3879 ● 2.BIP
- 0.0135 ● 3.MD
- 0.8574 ● 4.ASD
- 0.2003 ● 5.ADHD
- 0.1598 ● 6.TS
- 0.5929 ● 7.ANO
- 0.6180 ● 8.OCD

FE summary

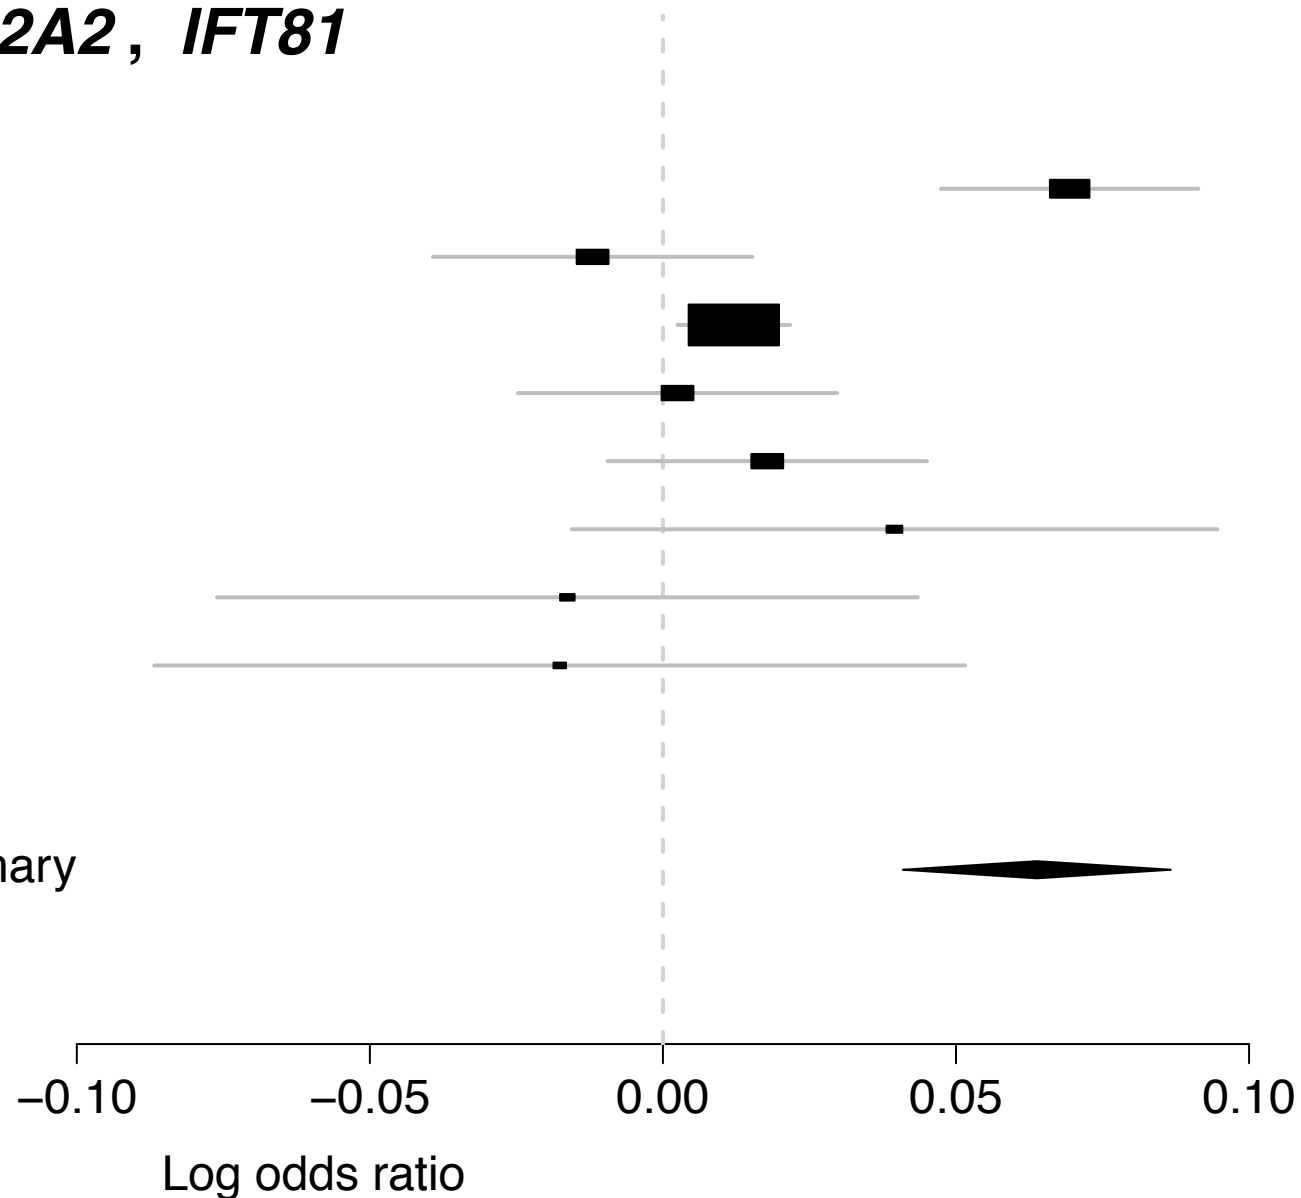

## PM-Plot

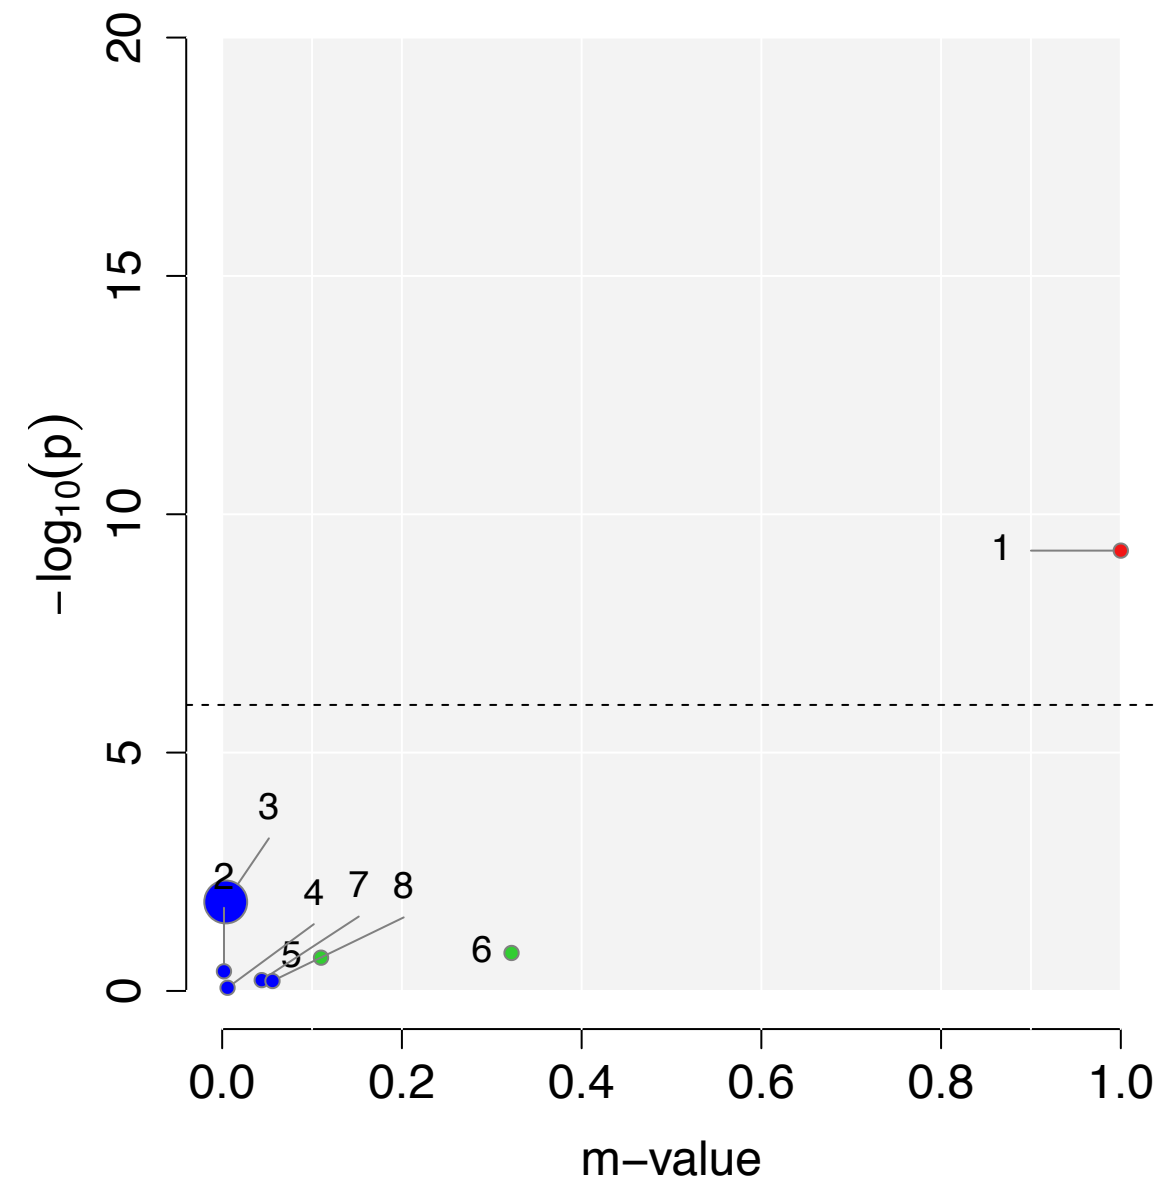

rs4906364 (Meta  $P = 2.7e \times 10^{-12}$ )

Gene : *PPP1R13B*, *ZFYVE21*

GWAS P-value

- 1.88 x 10<sup>-12</sup> ● 1.SCZ
- 1.06 x 10<sup>-5</sup> ● 2.BIP
- 0.1525 ● 3.MD
- 0.0688 ● 4.ASD
- 0.8483 ● 5.ADHD
- 0.3123 ● 6.TS
- 0.3724 ● 7.ANO
- 0.3567 ● 8.OCD

FE summary

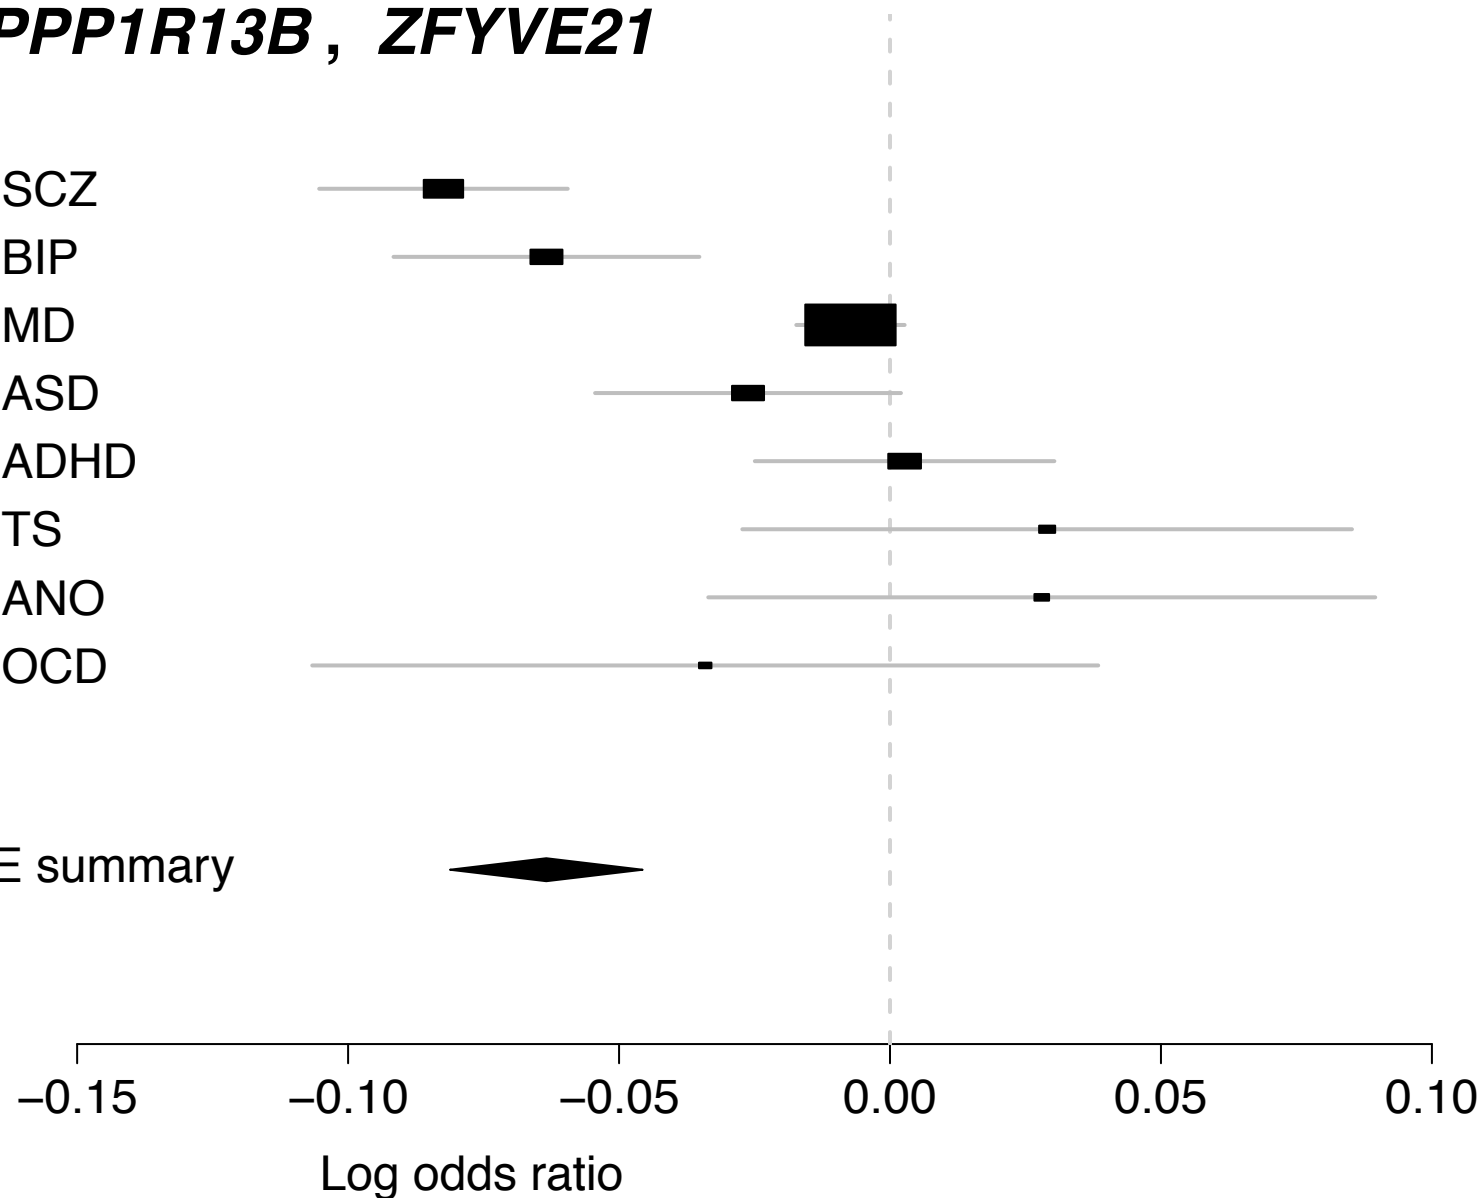

PM-Plot

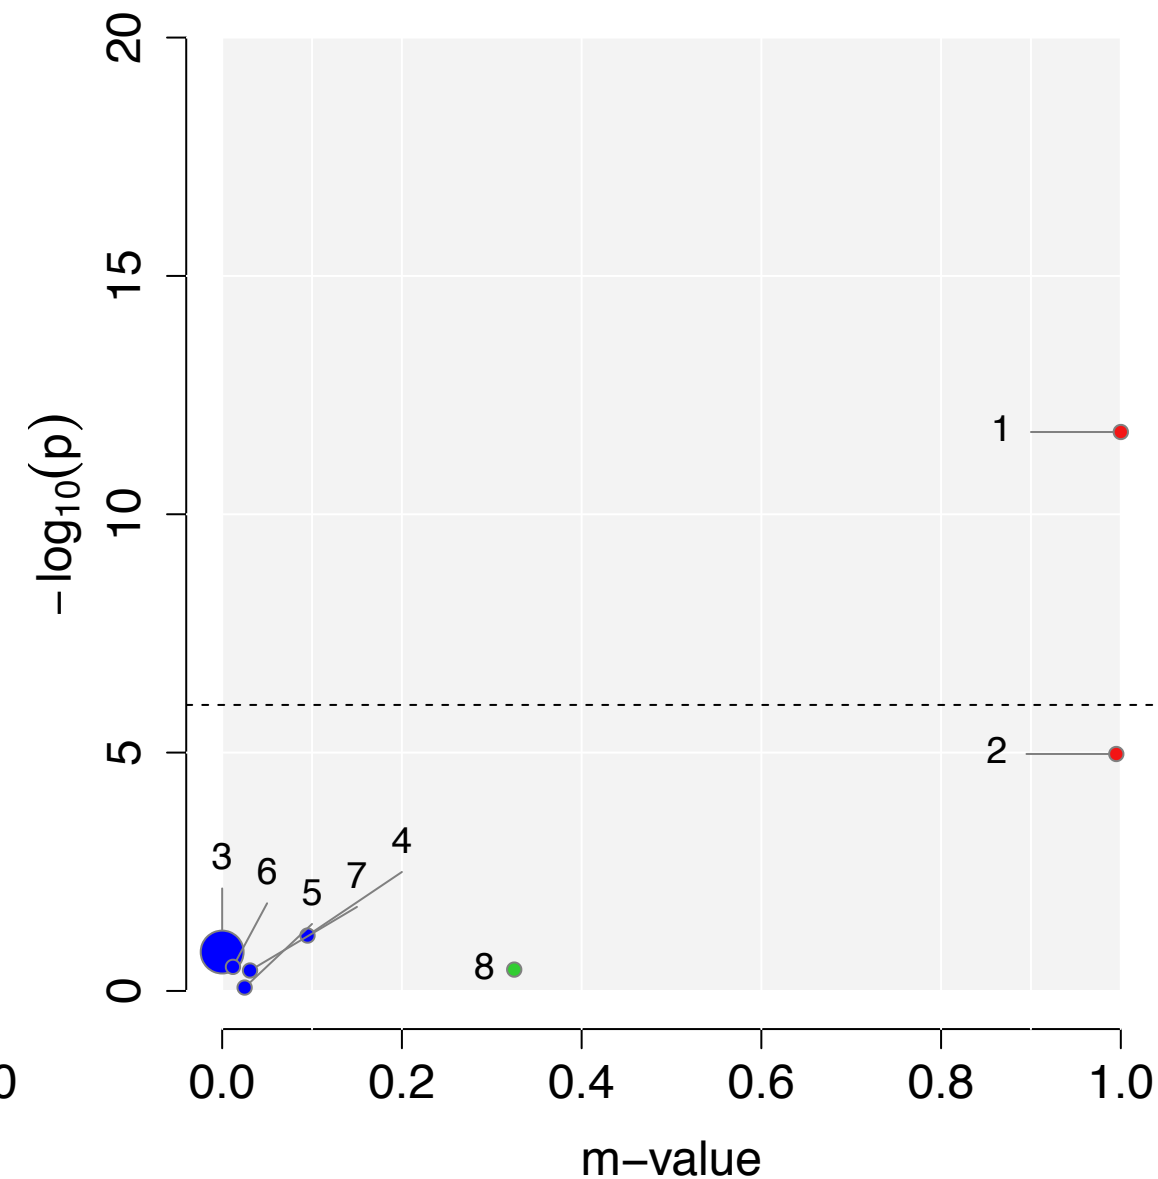

# rs4916723 (Meta $P = 1.82 \times 10^{-9}$ )

Gene : (>200kb)

## GWAS P-value

- 0.5189 ● 1.SCZ
- 0.5712 ● 2.BIP
- 0.0551 ● 3.MD
- $1.81 \times 10^{-6}$  ● 4.ASD
- $1.72 \times 10^{-8}$  ● 5.ADHD
- 0.0299 ● 6.TS
- 0.6183 ● 7.ANO
- 0.4349 ● 8.OCD

FE summary

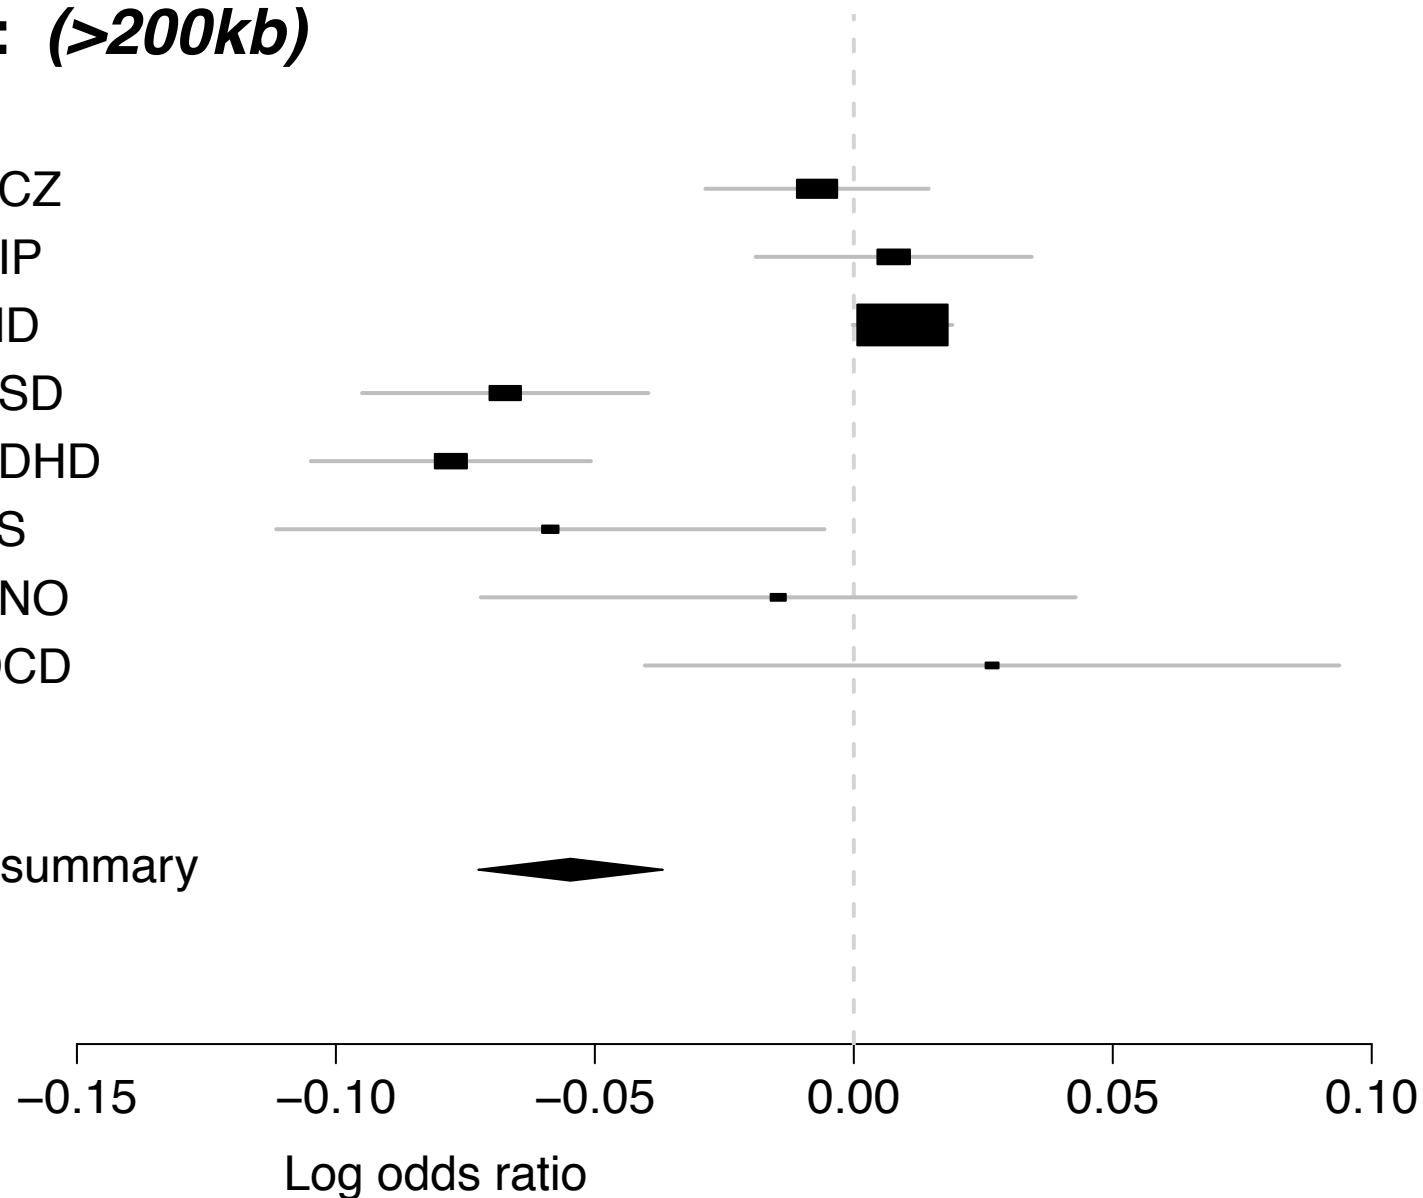

## PM-Plot

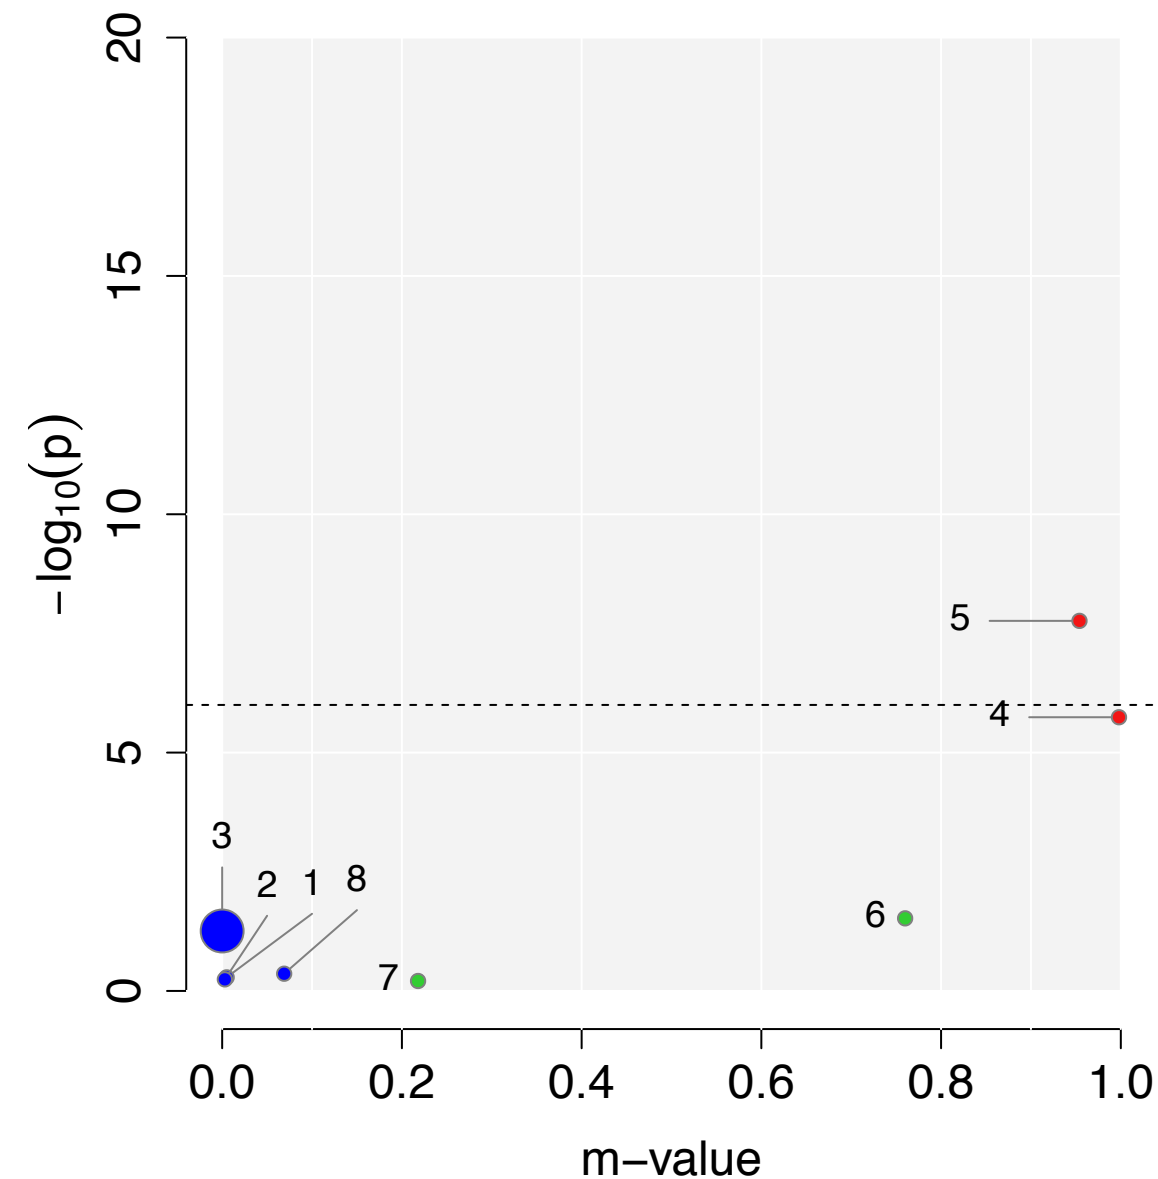

rs5757717 (Meta  $P = 9.07 \times 10^{-11}$ )

Gene : *RPS19BP1* , *ATF4*

GWAS P-value

- 4.15 x 10<sup>-10</sup> ● 1.SCZ
- 0.0267 ● 2.BIP
- 0.9203 ● 3.MD
- 0.3036 ● 4.ASD
- 0.9265 ● 5.ADHD
- 0.2524 ● 6.TS
- 0.8046 ● 7.ANO
- 2.83 x 10<sup>-5</sup> ● 8.OCD

FE summary

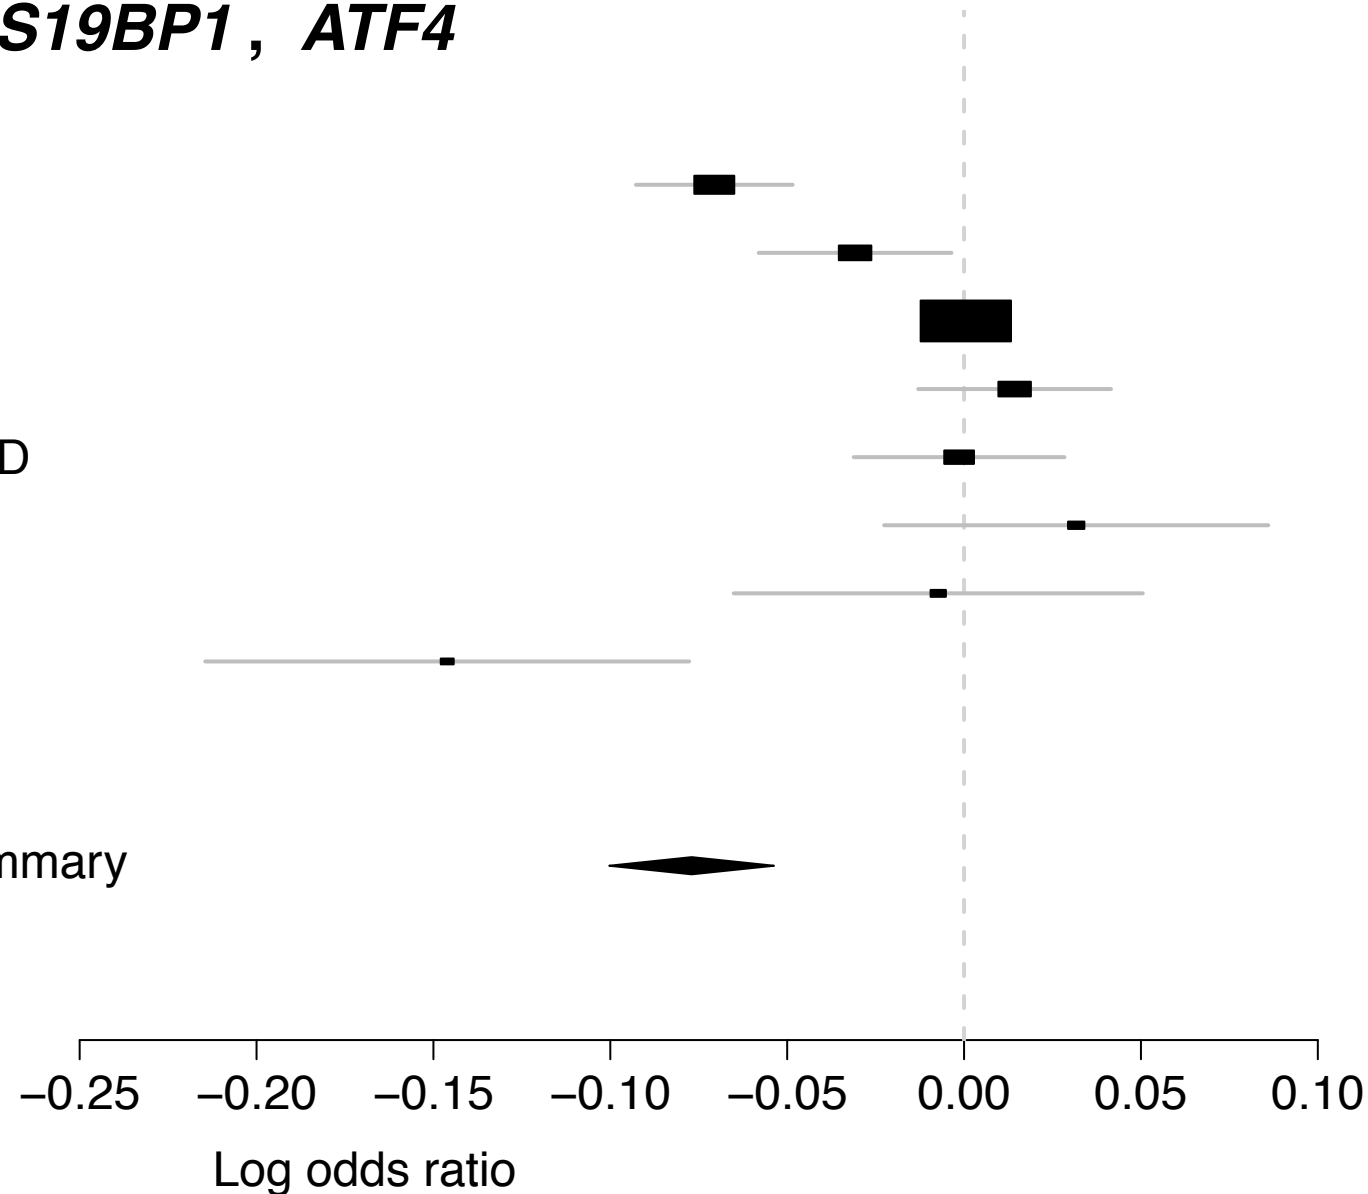

PM-Plot

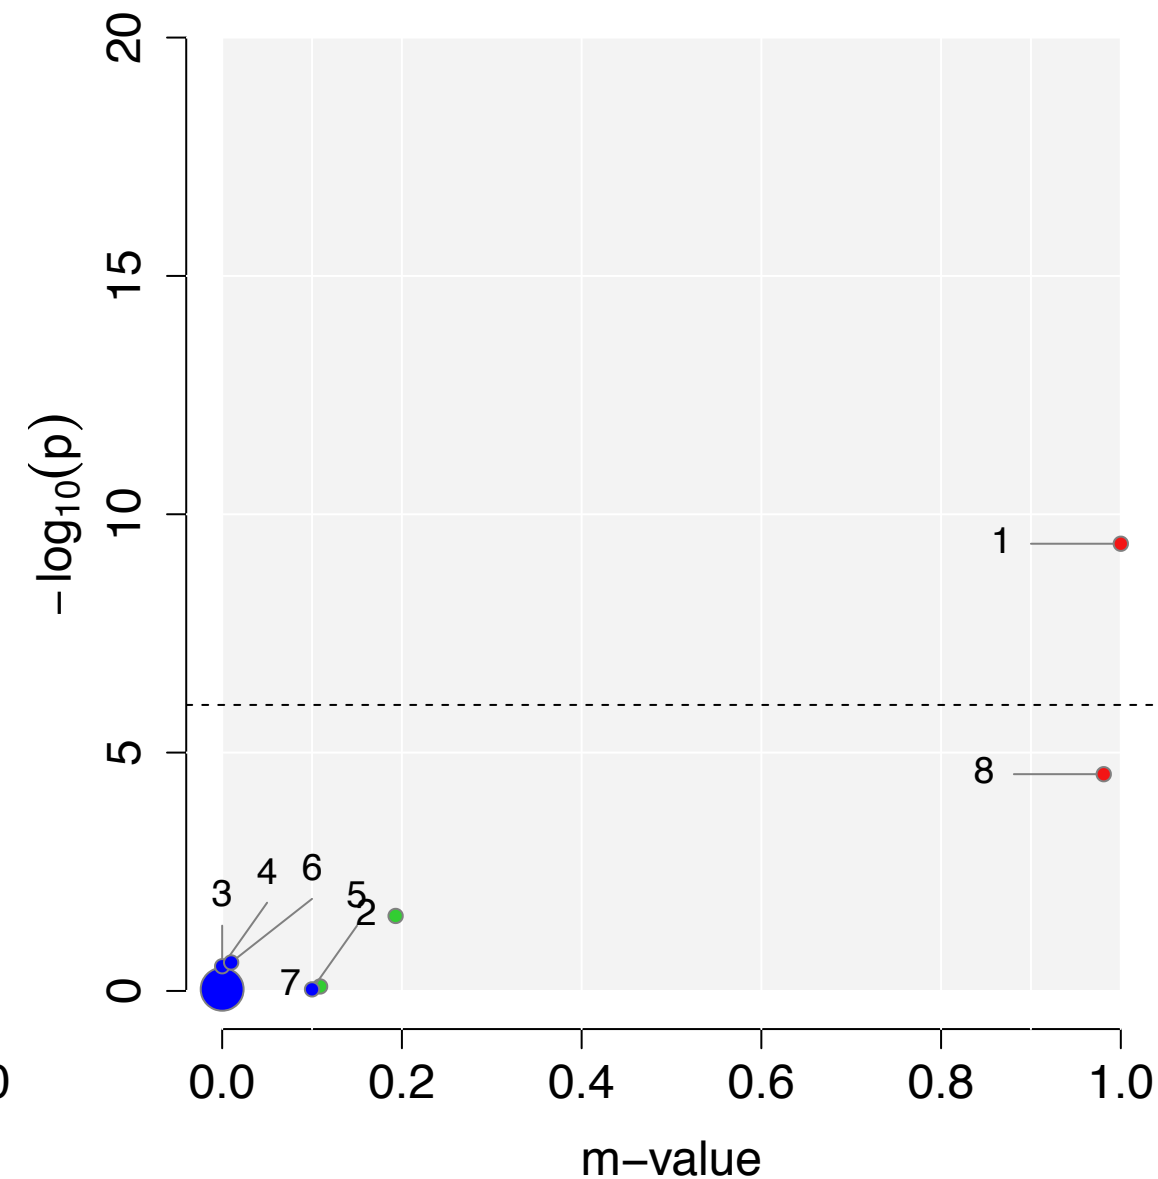

rs5758265 (Meta  $P = 5.36 \times 10^{-14}$ )

Gene : *L3MBTL2*, *CHADL*

GWAS P-value

- 1.08 x 10<sup>-9</sup> ● 1.SCZ
- 0.1263 ● 2.BIP
- 9.38 x 10<sup>-9</sup> ● 3.MD
- 0.1200 ● 4.ASD
- 0.8850 ● 5.ADHD
- 0.0024 ● 6.TS
- 0.2123 ● 7.ANO
- 0.0945 ● 8.OCD

FE summary

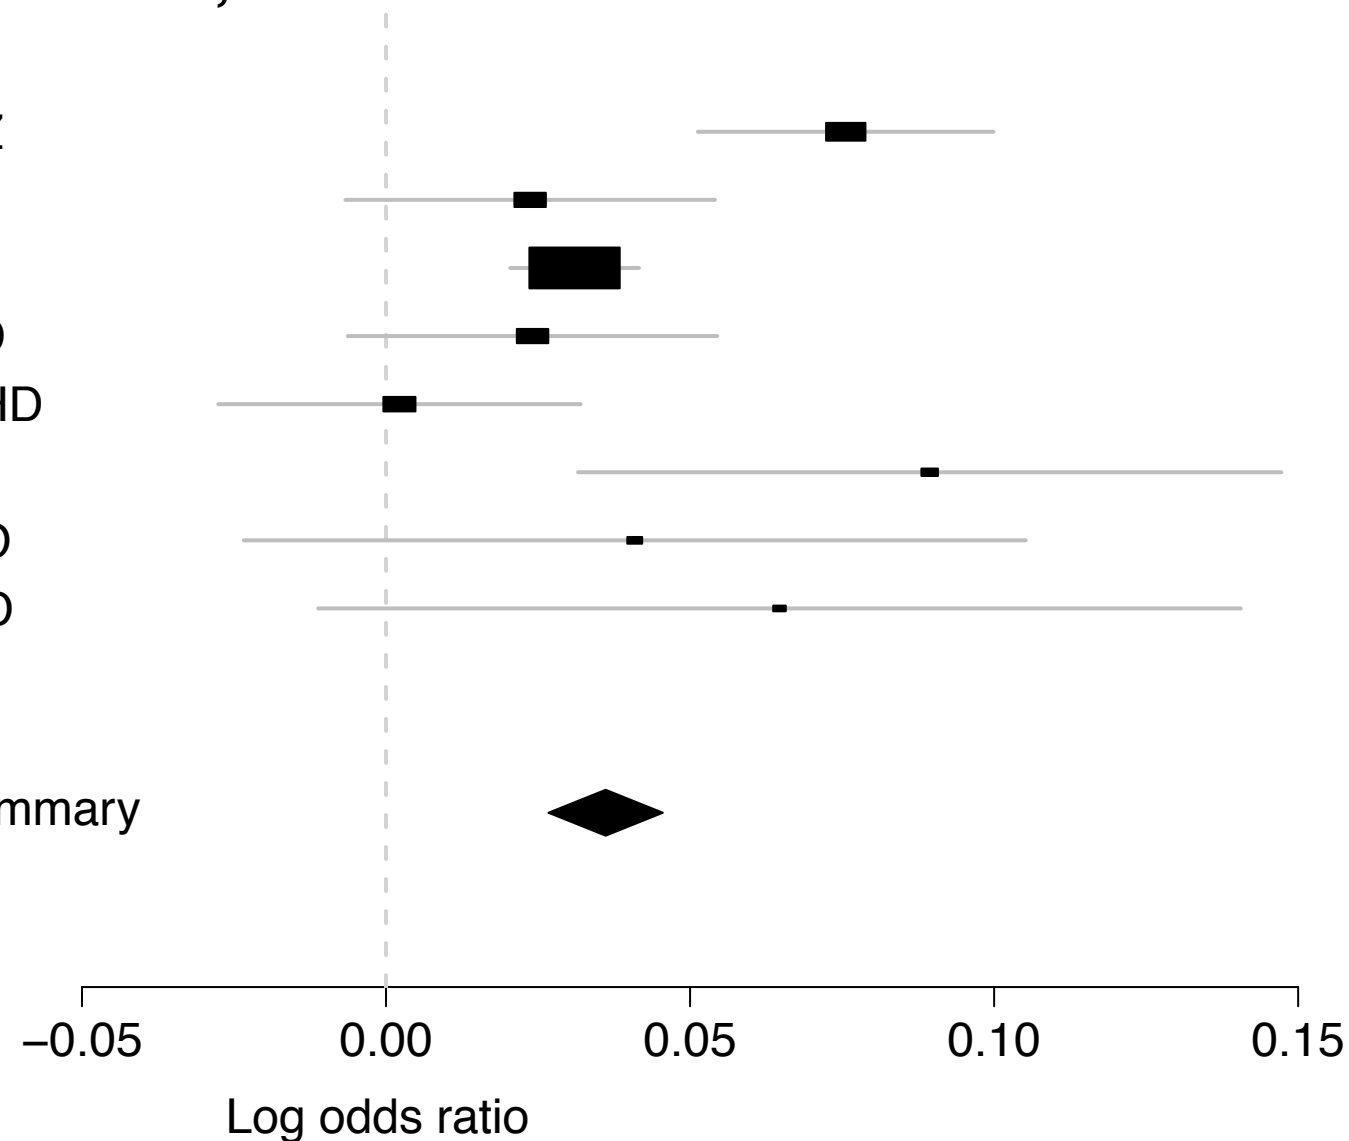

PM-Plot

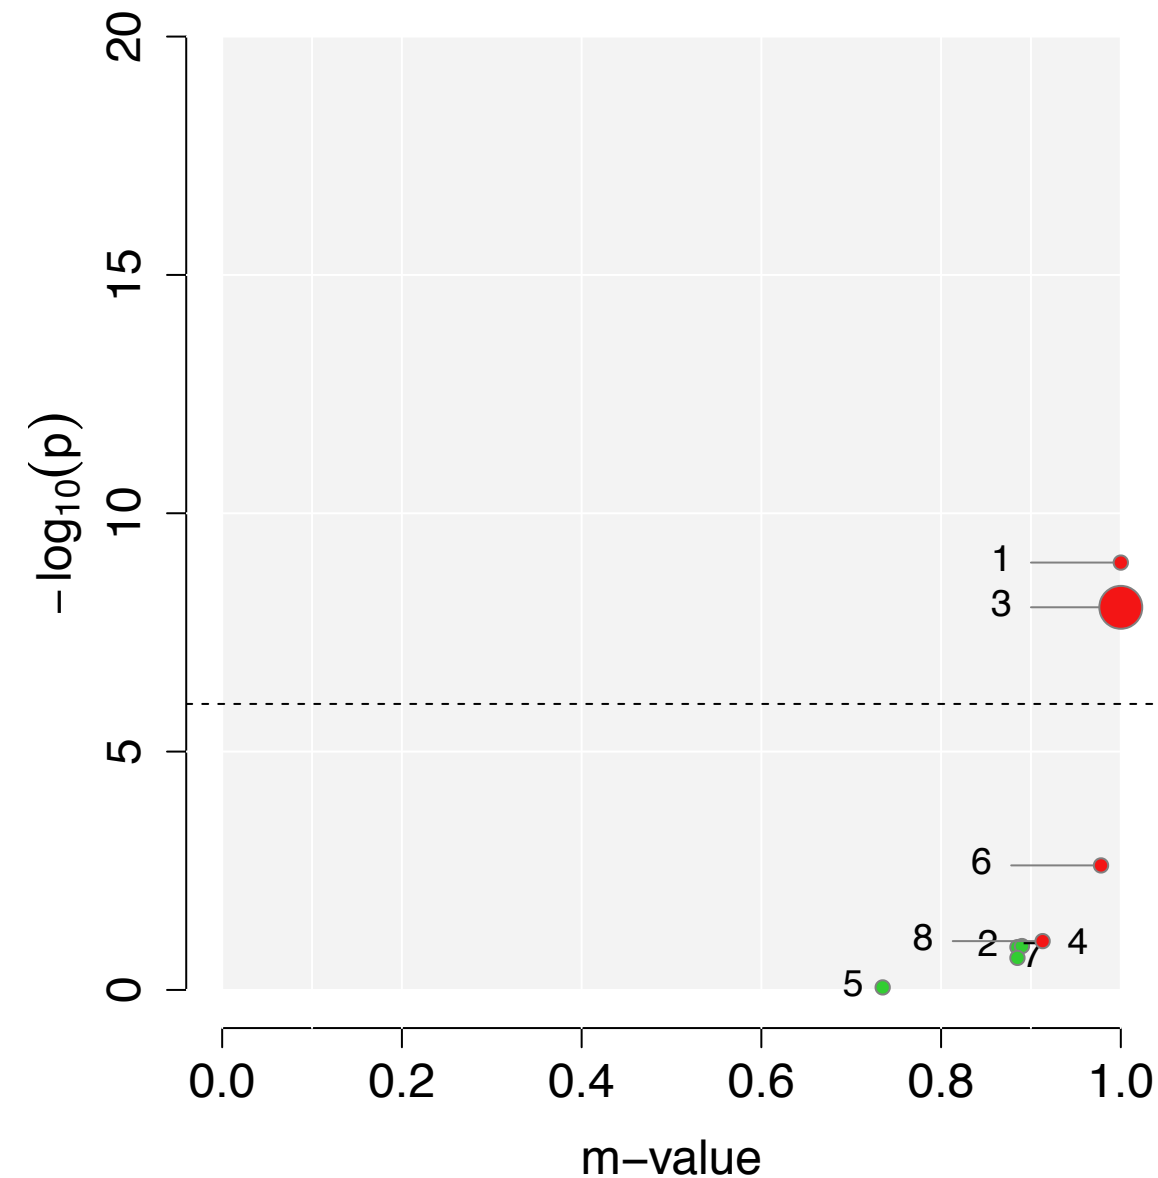



# rs6047287 (Meta $P = 2.72 \times 10^{-10}$ )

Gene : *KIZ*

## GWAS P-value

- 0.0001 ● 1.SCZ
- 0.5957 ● 2.BIP
- 0.5504 ● 3.MD
- $7.86 \times 10^{-8}$  ● 4.ASD
- $1.97 \times 10^{-5}$  ● 5.ADHD
- 0.7143 ● 6.TS
- 0.6429 ● 7.ANO
- 0.0431 ● 8.OCD

FE summary

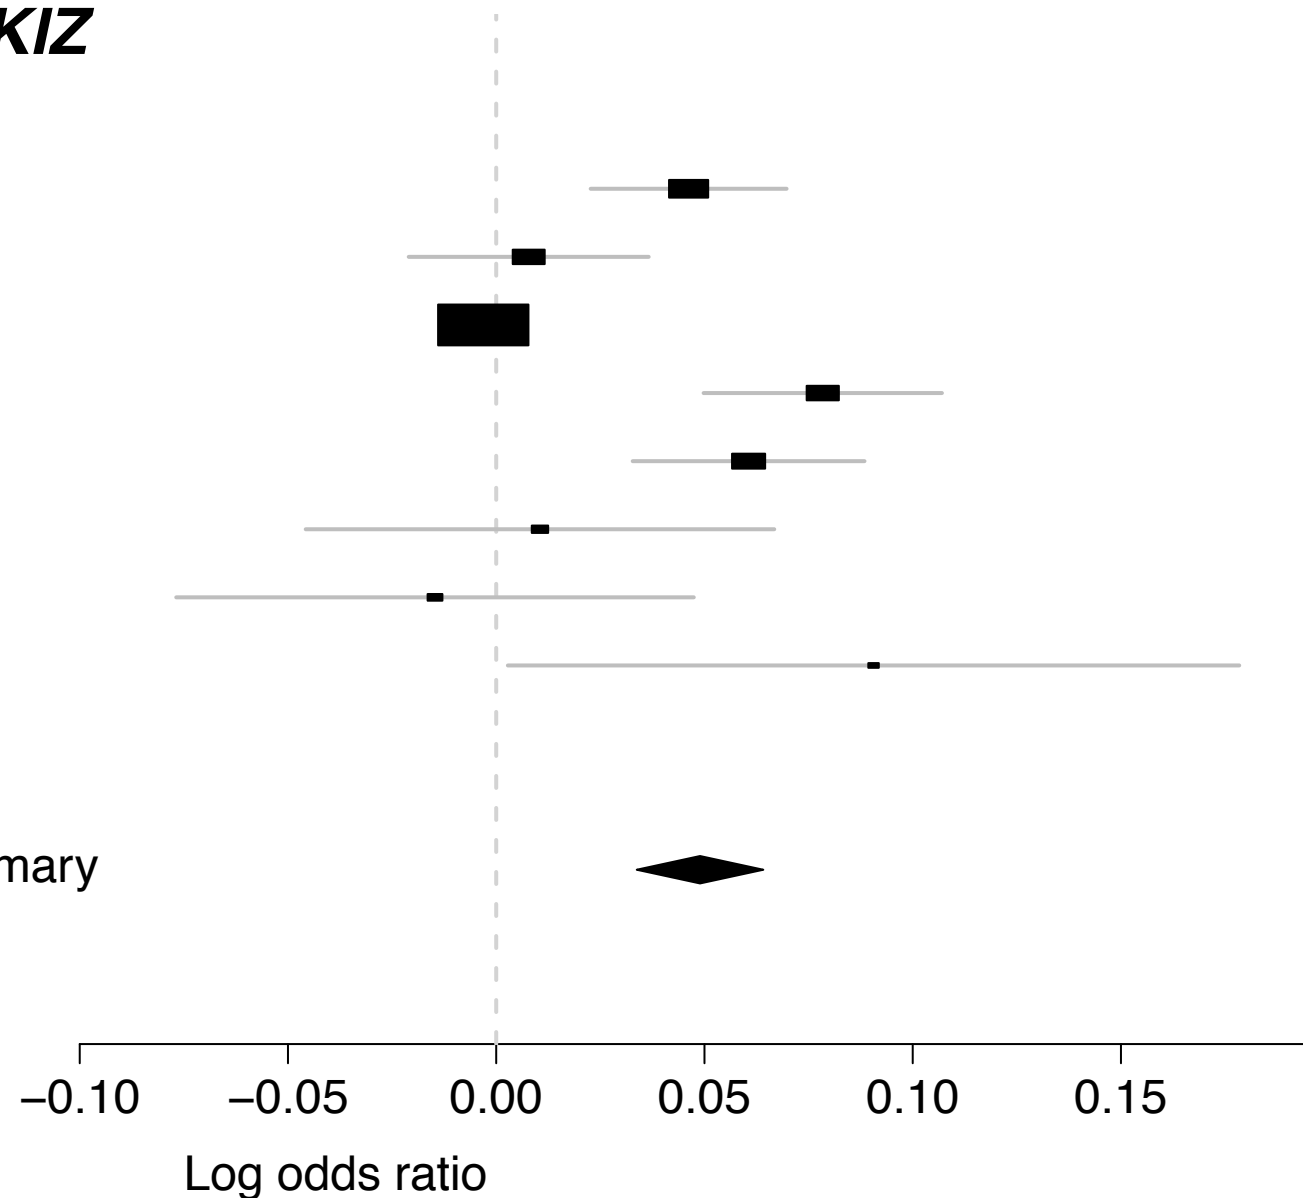

## PM-Plot

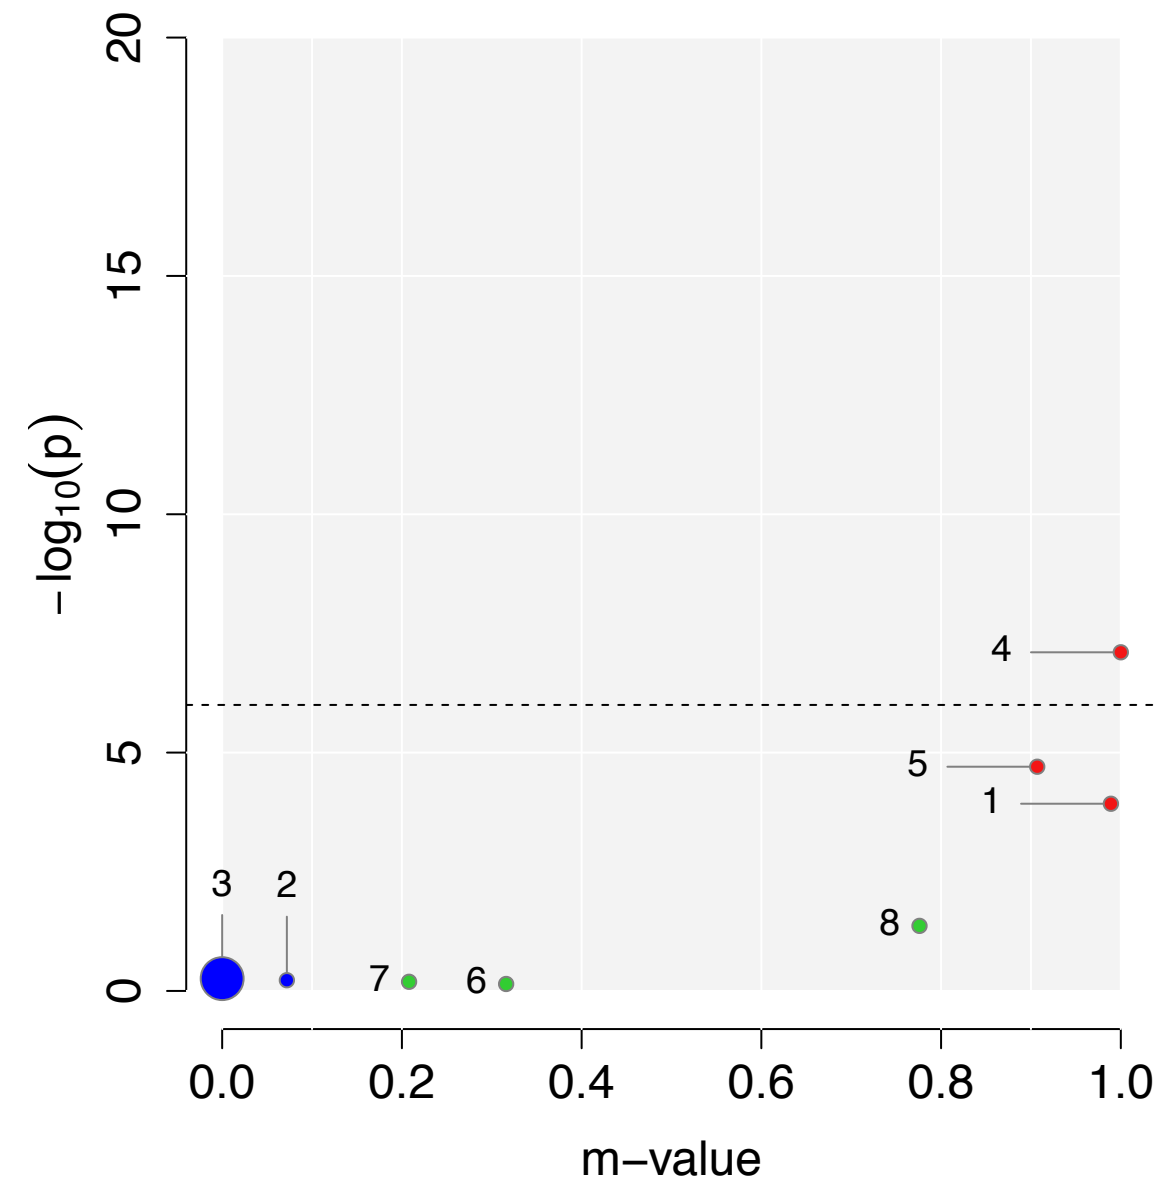

# rs6125656 (Meta $P = 2.81 \times 10^{-9}$ )

Gene : *KCNB1*, *PTGIS*

## GWAS P-value

- 5.73 x 10<sup>-6</sup> ● 1.SCZ
- 7.16 x 10<sup>-5</sup> ● 2.BIP
- 5.91 x 10<sup>-5</sup> ● 3.MD
- 0.0009 ● 4.ASD
- 0.6943 ● 5.ADHD
- 0.7689 ● 6.TS
- 0.1187 ● 7.ANO
- 0.6954 ● 8.OCD

FE summary

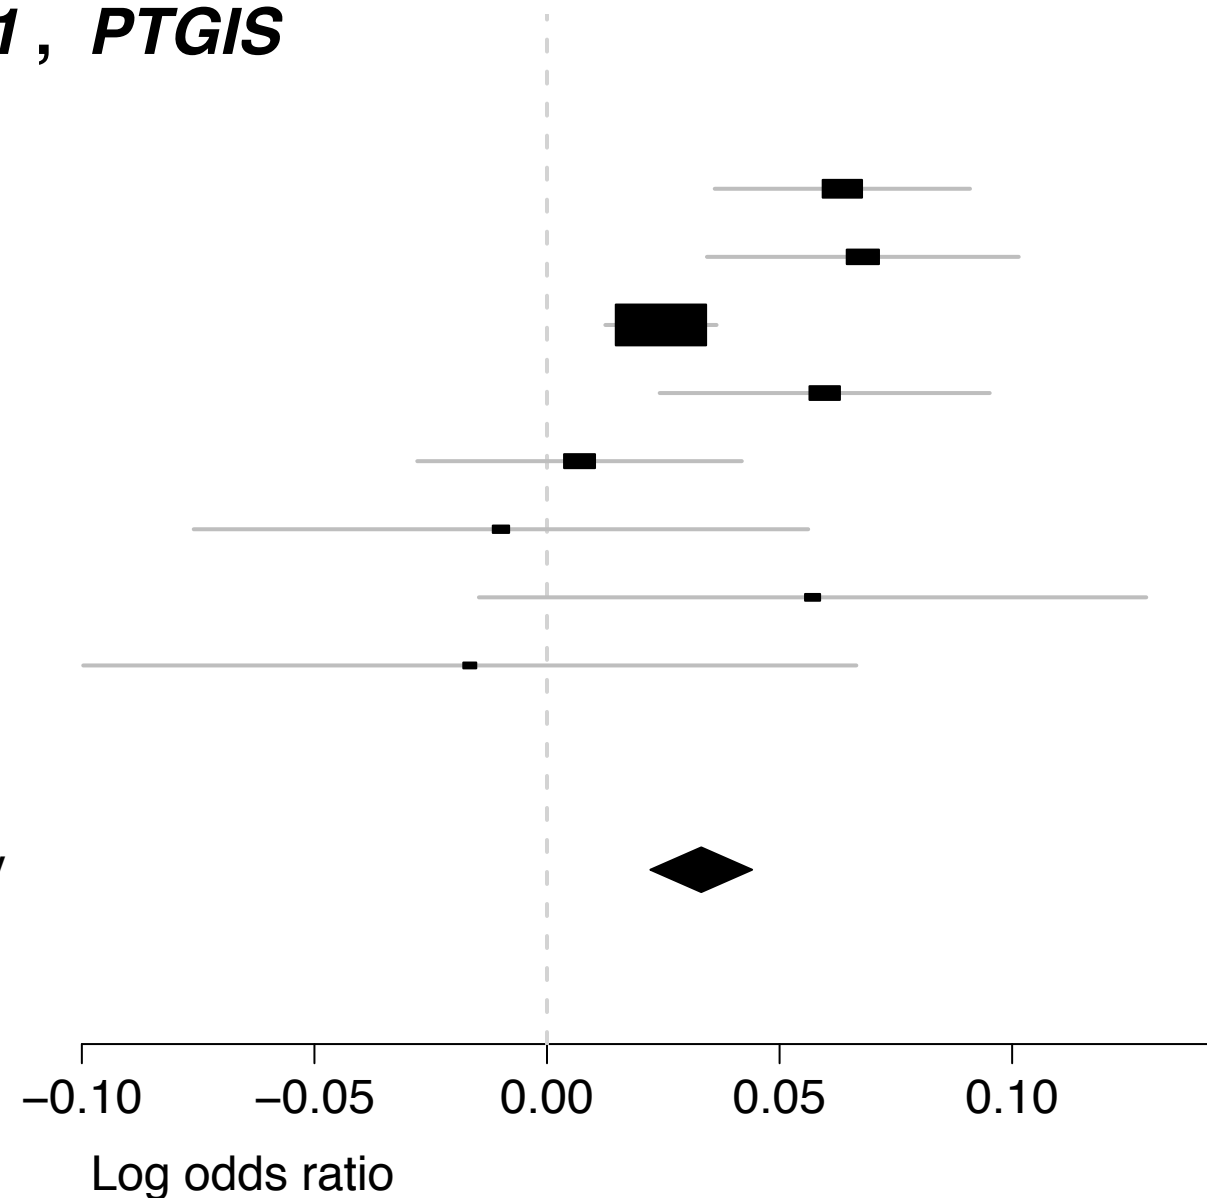

## PM-Plot

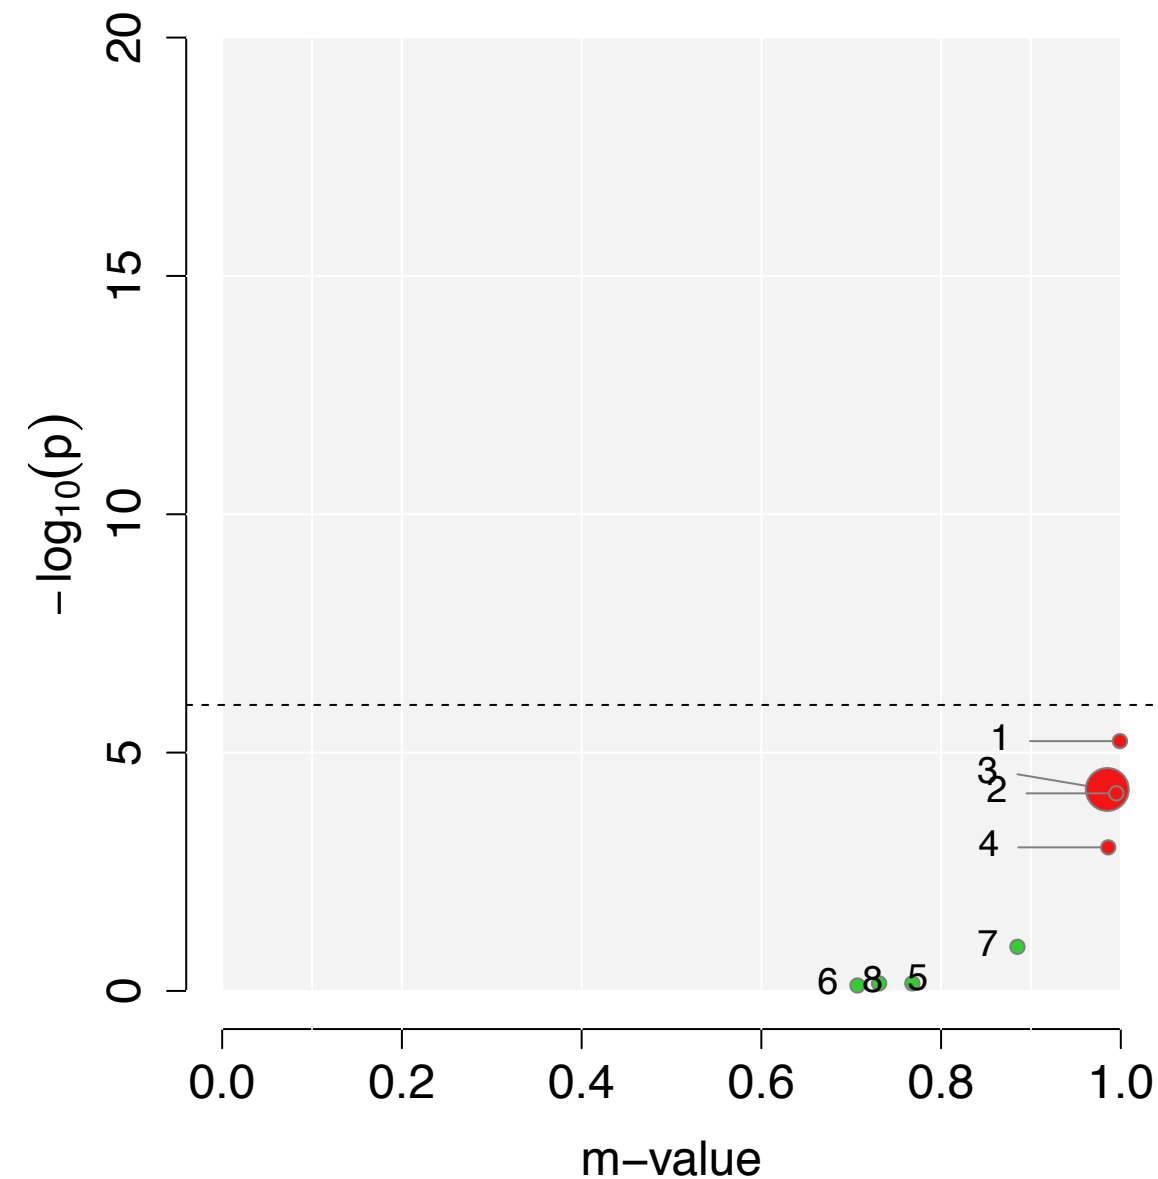

# rs6471814 (Meta $P = 1.77 \times 10^{-8}$ )

Gene : (>200kb)

## GWAS P-value

- 2.25 x 10<sup>-8</sup> ● 1.SCZ
- 0.0693 ● 2.BIP
- 0.0107 ● 3.MD
- 0.7389 ● 4.ASD
- 0.2374 ● 5.ADHD
- 0.2374 ● 6.TS
- 0.0128 ● 7.ANO
- 0.0195 ● 8.OCD

FE summary

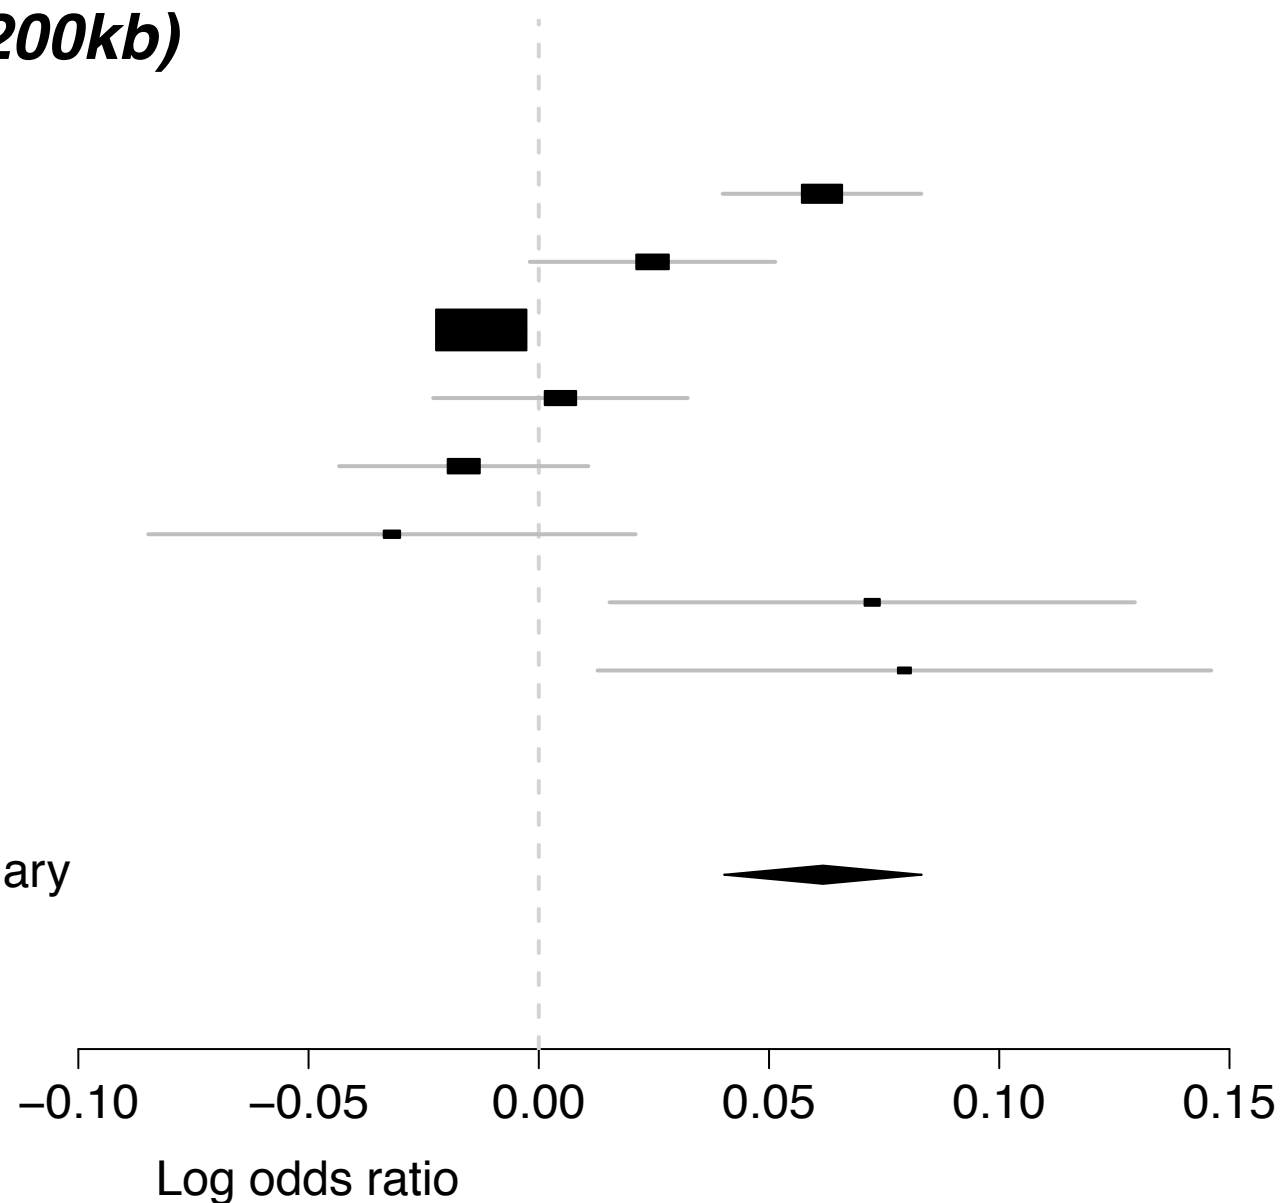

## PM-Plot

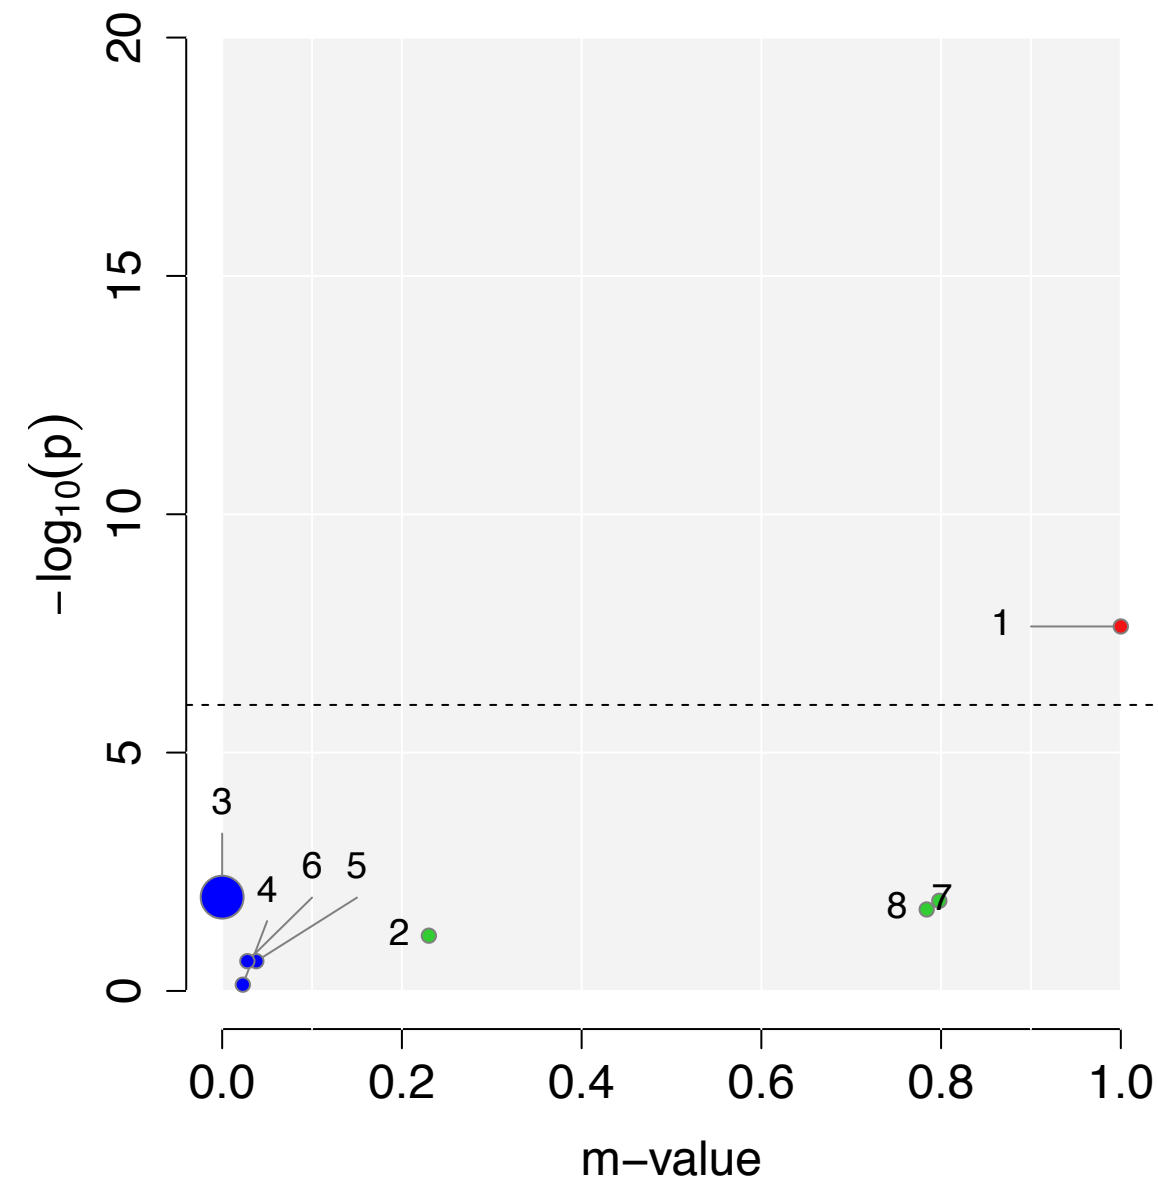

# rs6694545 (Meta $P = 4.19 \times 10^{-9}$ )

Gene : (>200kb)

## GWAS P-value

- 2.39 x 10<sup>-9</sup> ● 1.SCZ
- 0.0002 ● 2.BIP
- 0.6175 ● 3.MD
- 0.9448 ● 4.ASD
- 0.3769 ● 5.ADHD
- 0.1217 ● 6.TS
- 0.1220 ● 7.ANO
- 0.9557 ● 8.OCD

FE summary

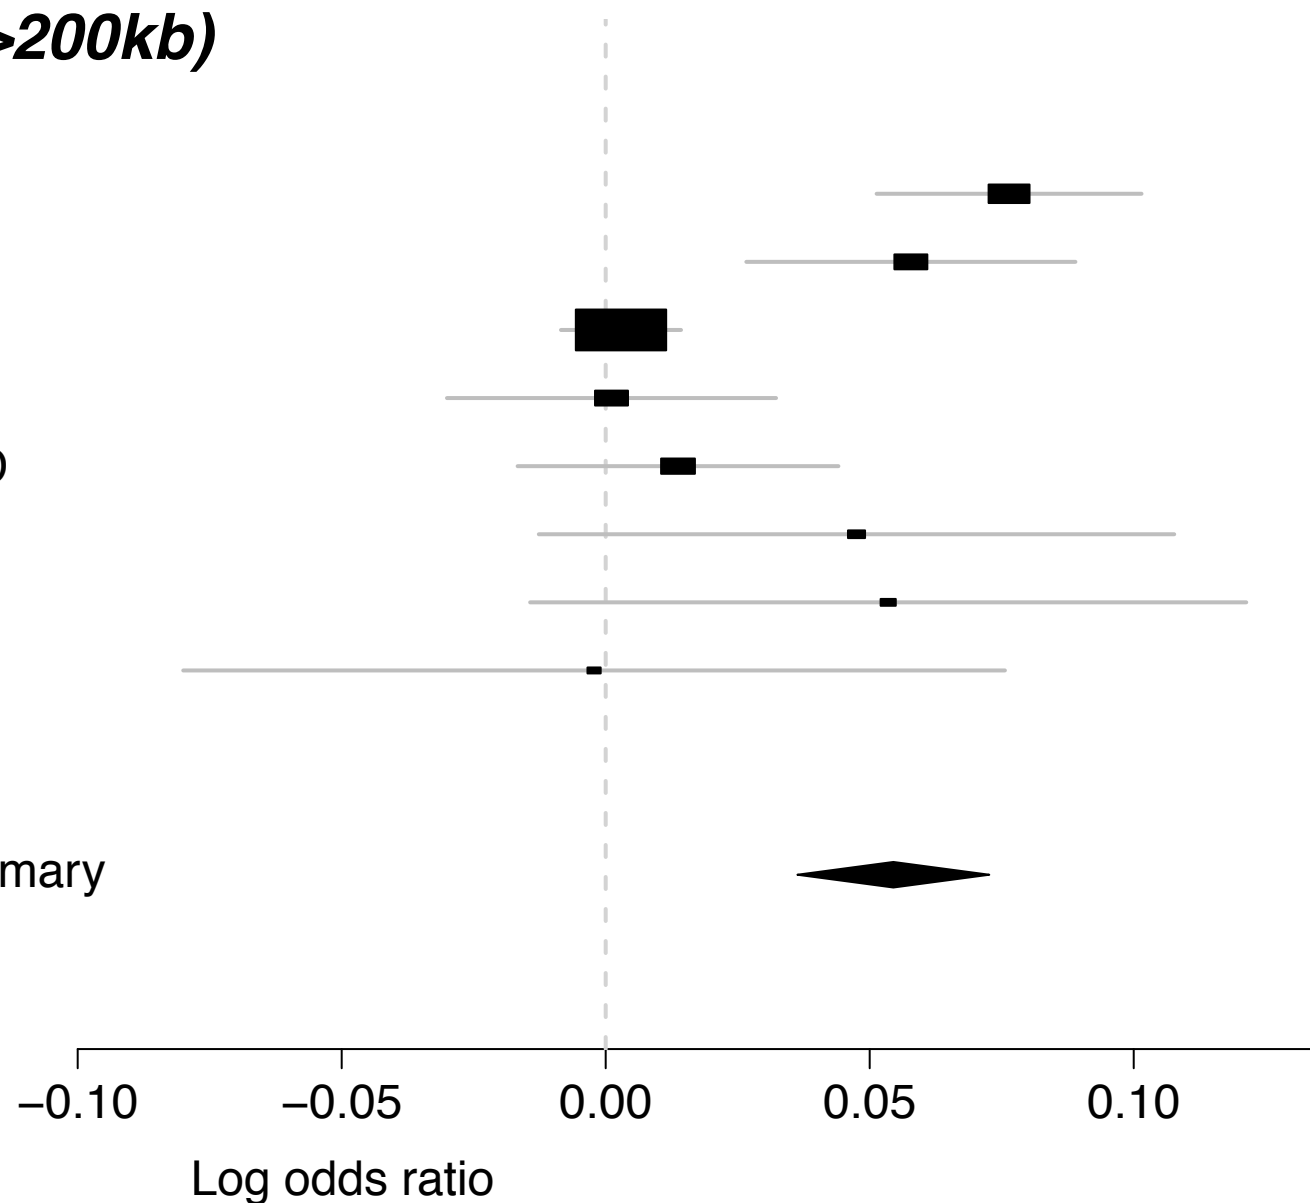

## PM-Plot

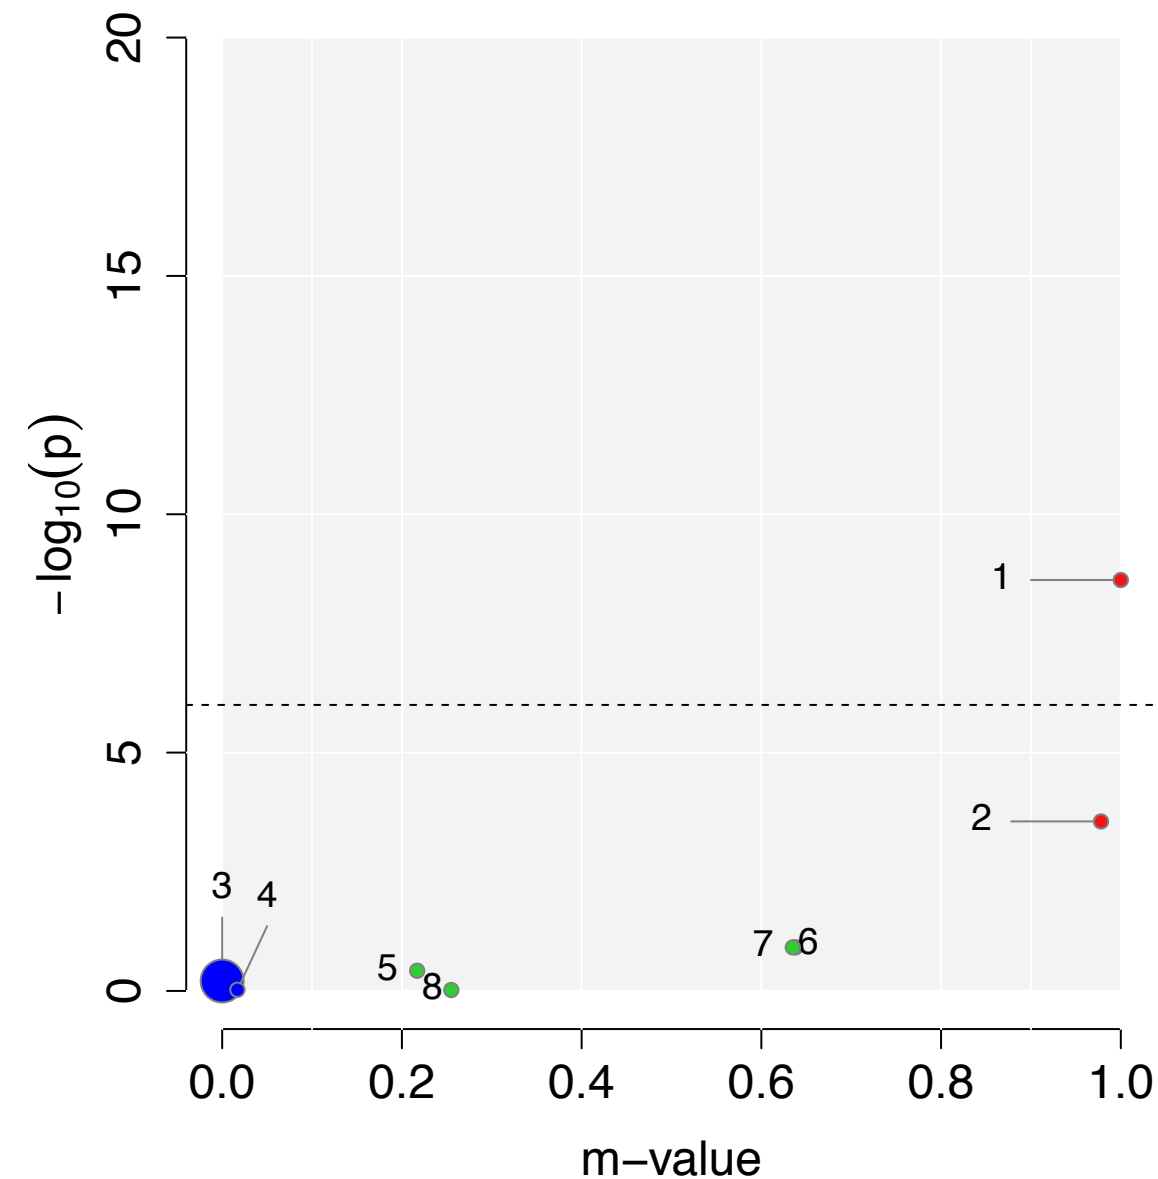

# rs6969410 (Meta $P = 4.65 \times 10^{-9}$ )

Gene : (>200kb)

## GWAS P-value

- $2.32 \times 10^{-6}$  ● 1.SCZ
- 0.0625 ● 2.BIP
- $1.29 \times 10^{-5}$  ● 3.MD
- 0.0013 ● 4.ASD
- 0.2185 ● 5.ADHD
- 0.7461 ● 6.TS
- 0.5971 ● 7.ANO
- 0.0458 ● 8.OCD

FE summary

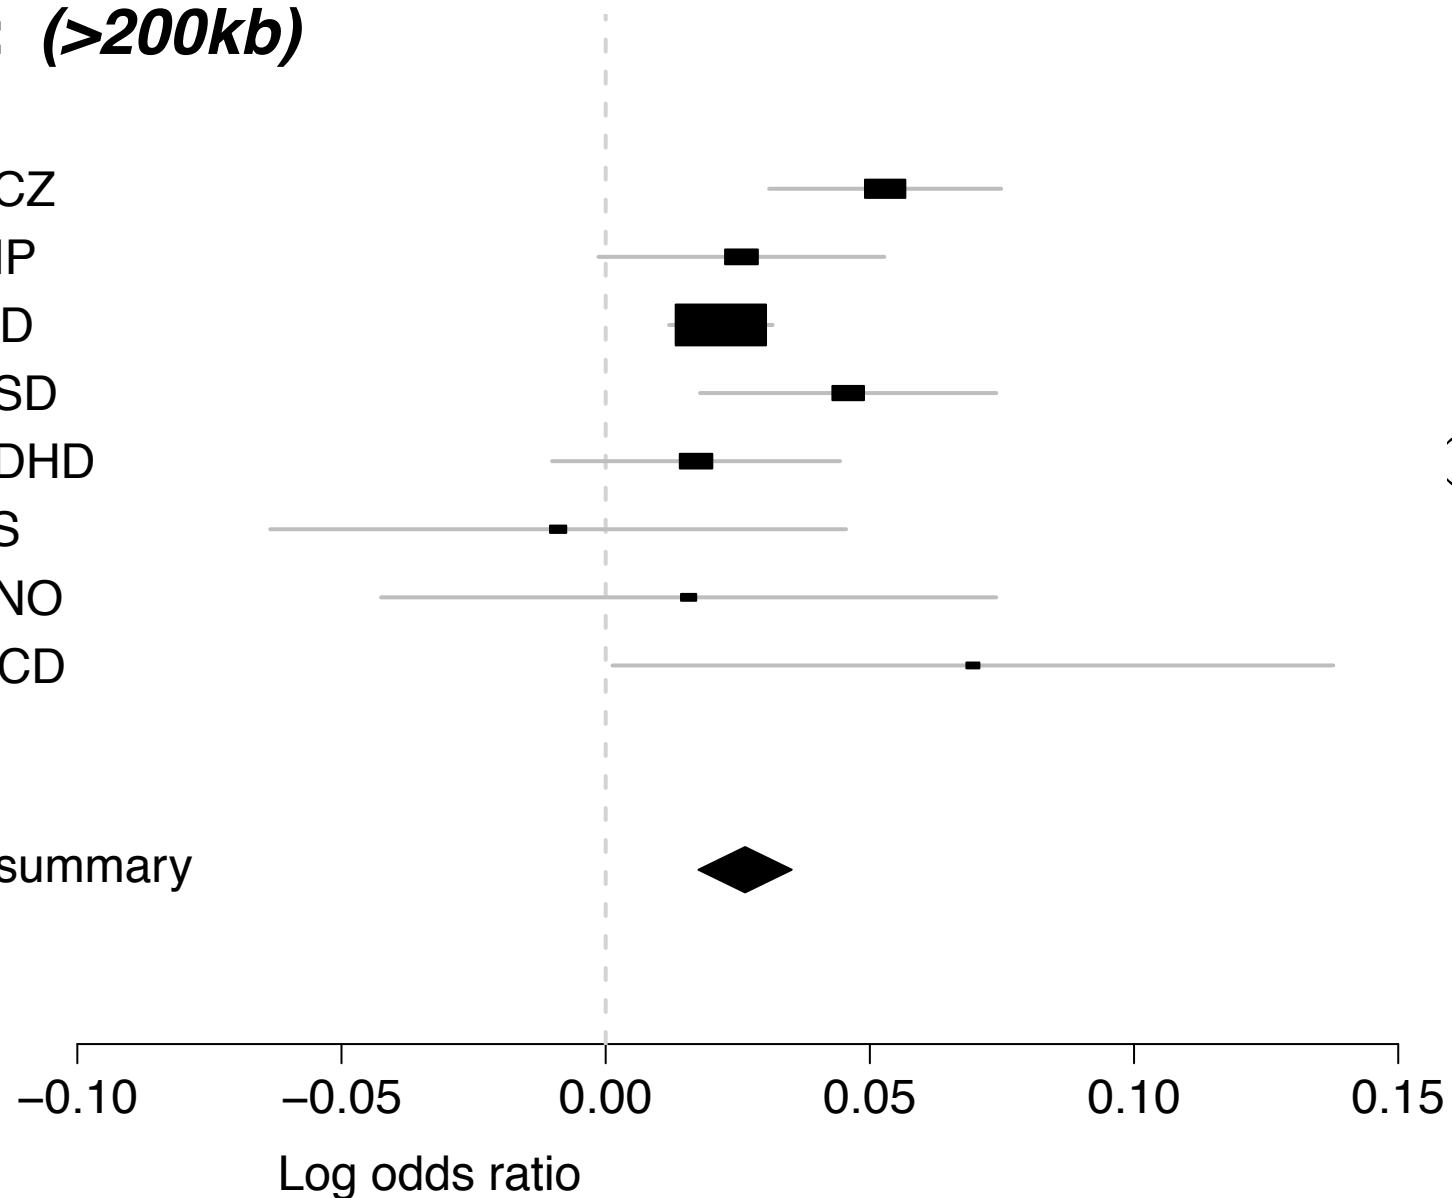

## PM-Plot

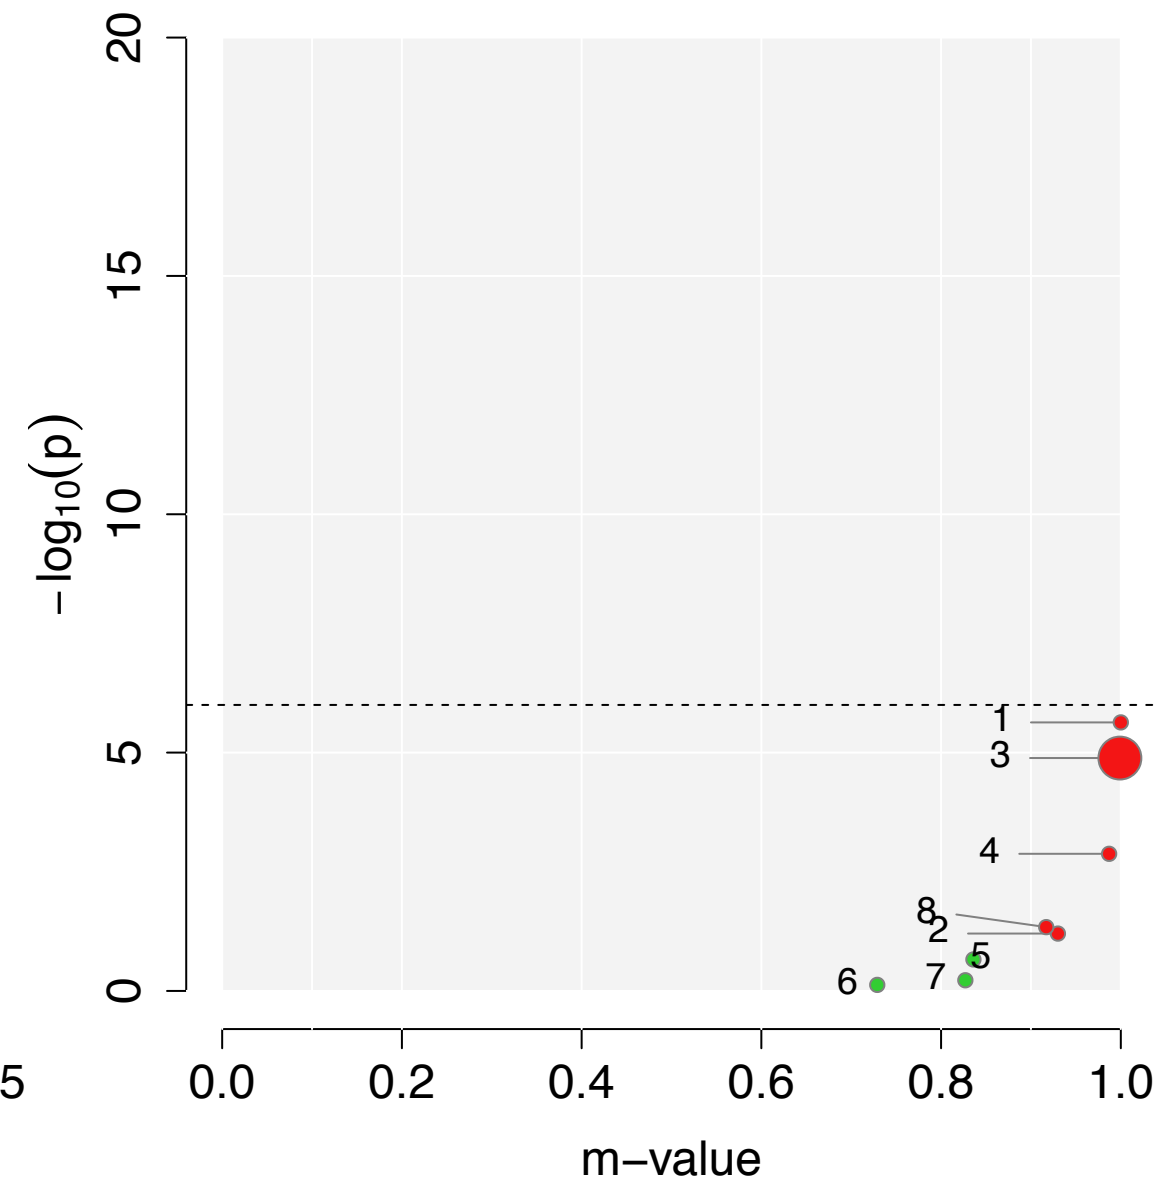

# rs7071123 (Meta $P = 9.78 \times 10^{-11}$ )

Gene : **CACNB2**

## GWAS P-value

- $3.10 \times 10^{-10}$  ● 1.SCZ
- 0.0001 ● 2.BIP
- 0.2756 ● 3.MD
- 0.0233 ● 4.ASD
- 0.3193 ● 5.ADHD
- 0.0440 ● 6.TS
- 0.4227 ● 7.ANO
- 0.7289 ● 8.OCD

FE summary

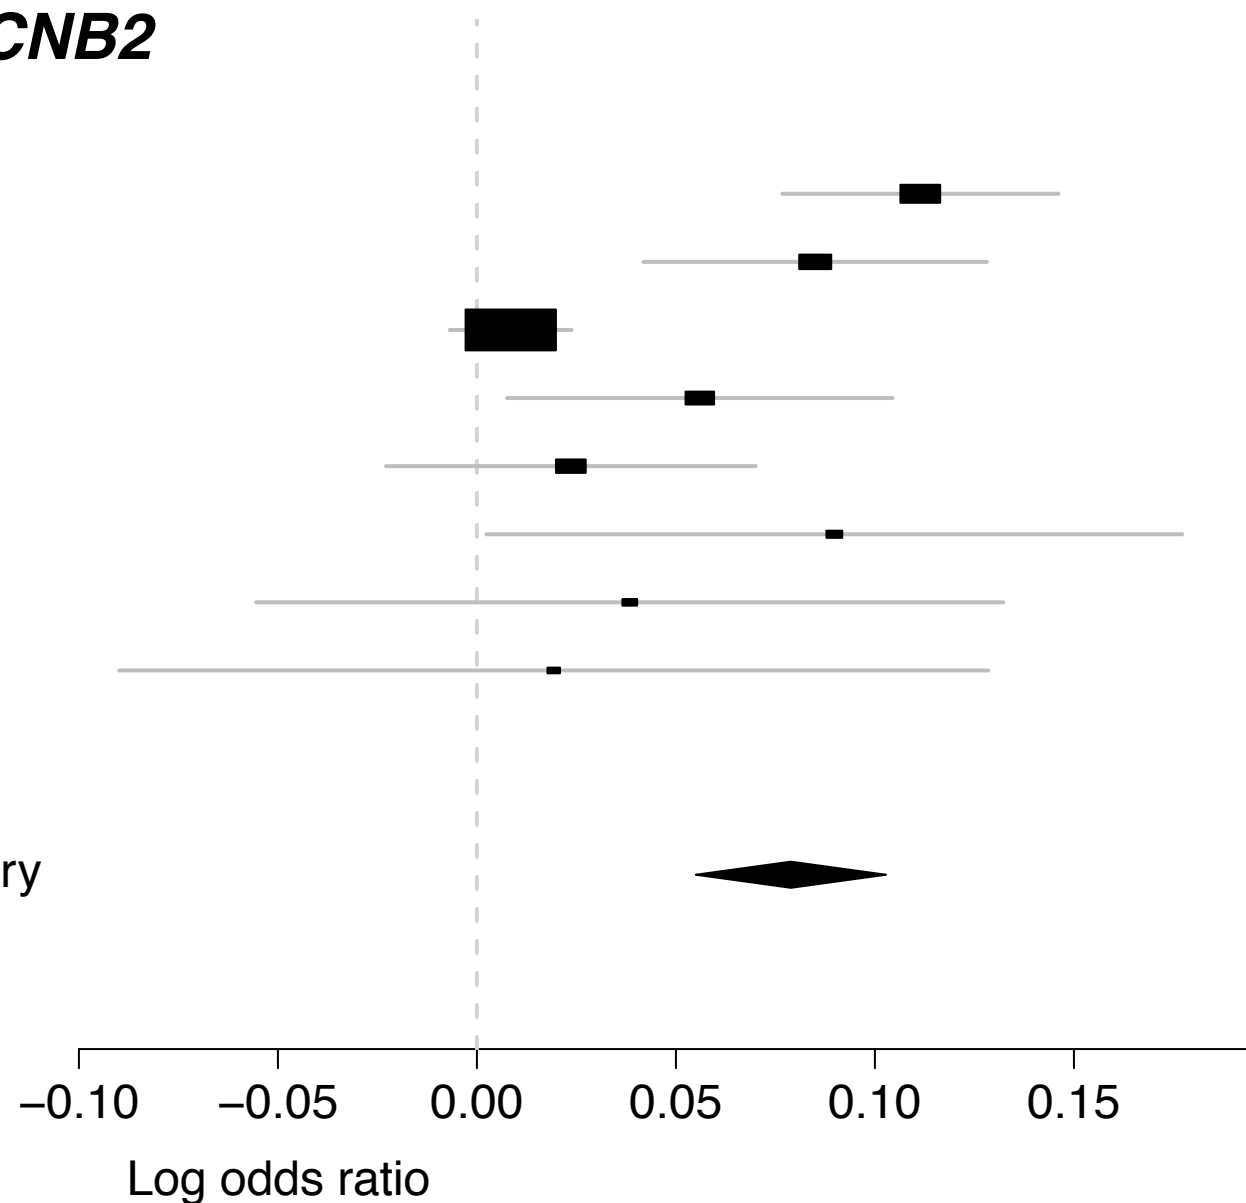

## PM-Plot

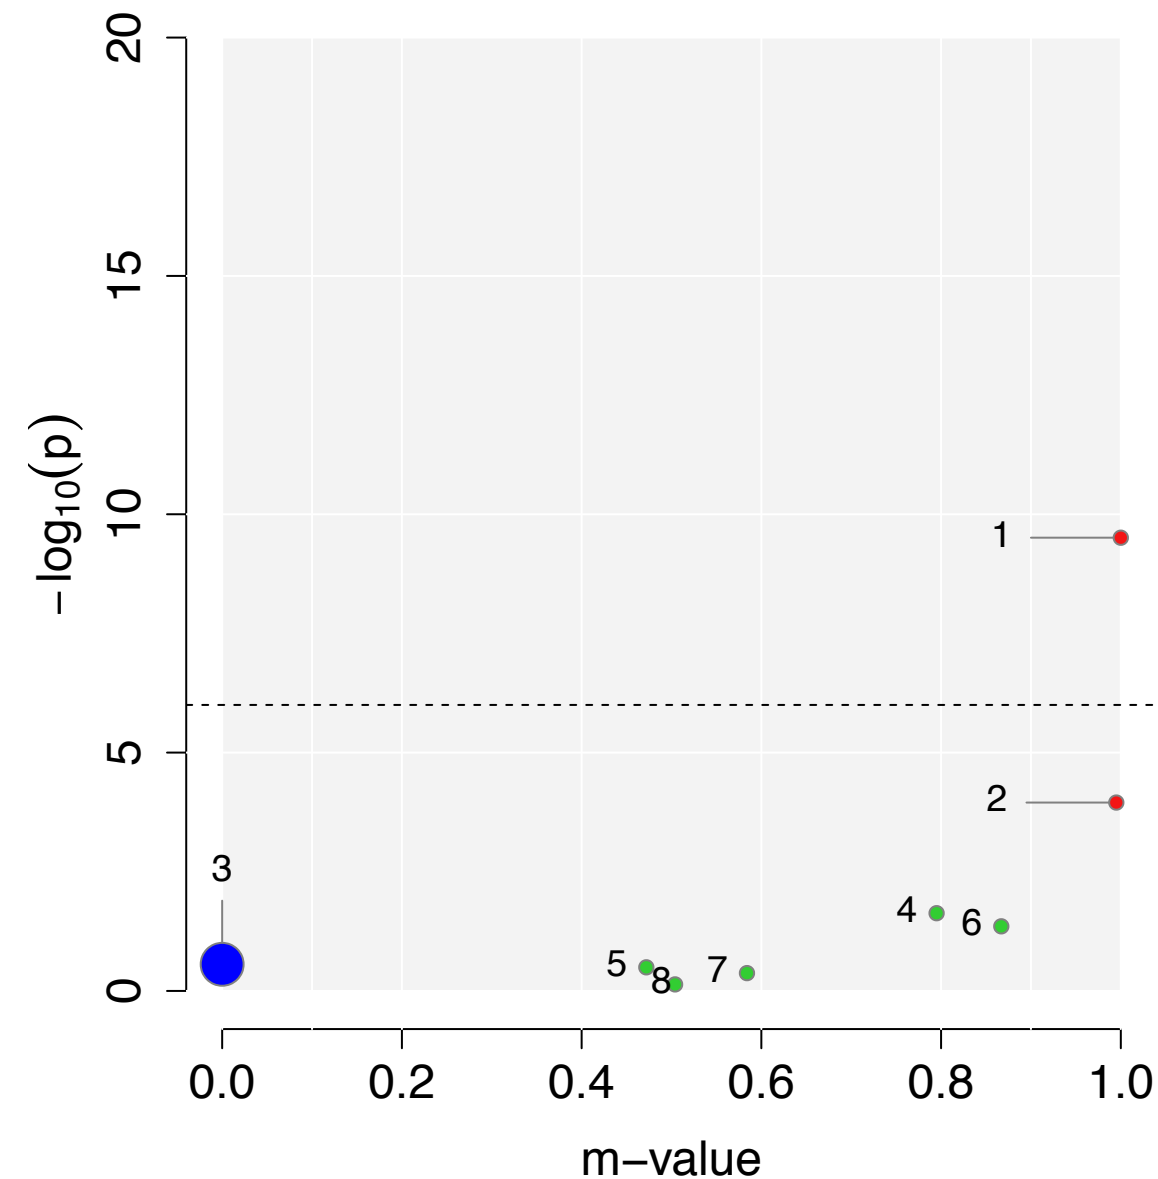

rs7085104 (Meta  $P = 3.35 \times 10^{-16}$ )

Gene : *AS3MT*, *C10orf32*

GWAS P-value

- 1.03 x 10<sup>-17</sup> ● 1.SCZ
- 1.45 x 10<sup>-5</sup> ● 2.BIP
- 0.0007 ● 3.MD
- 0.6490 ● 4.ASD
- 0.2656 ● 5.ADHD
- 0.9602 ● 6.TS
- 0.9072 ● 7.ANO
- 0.1988 ● 8.OCD

FE summary

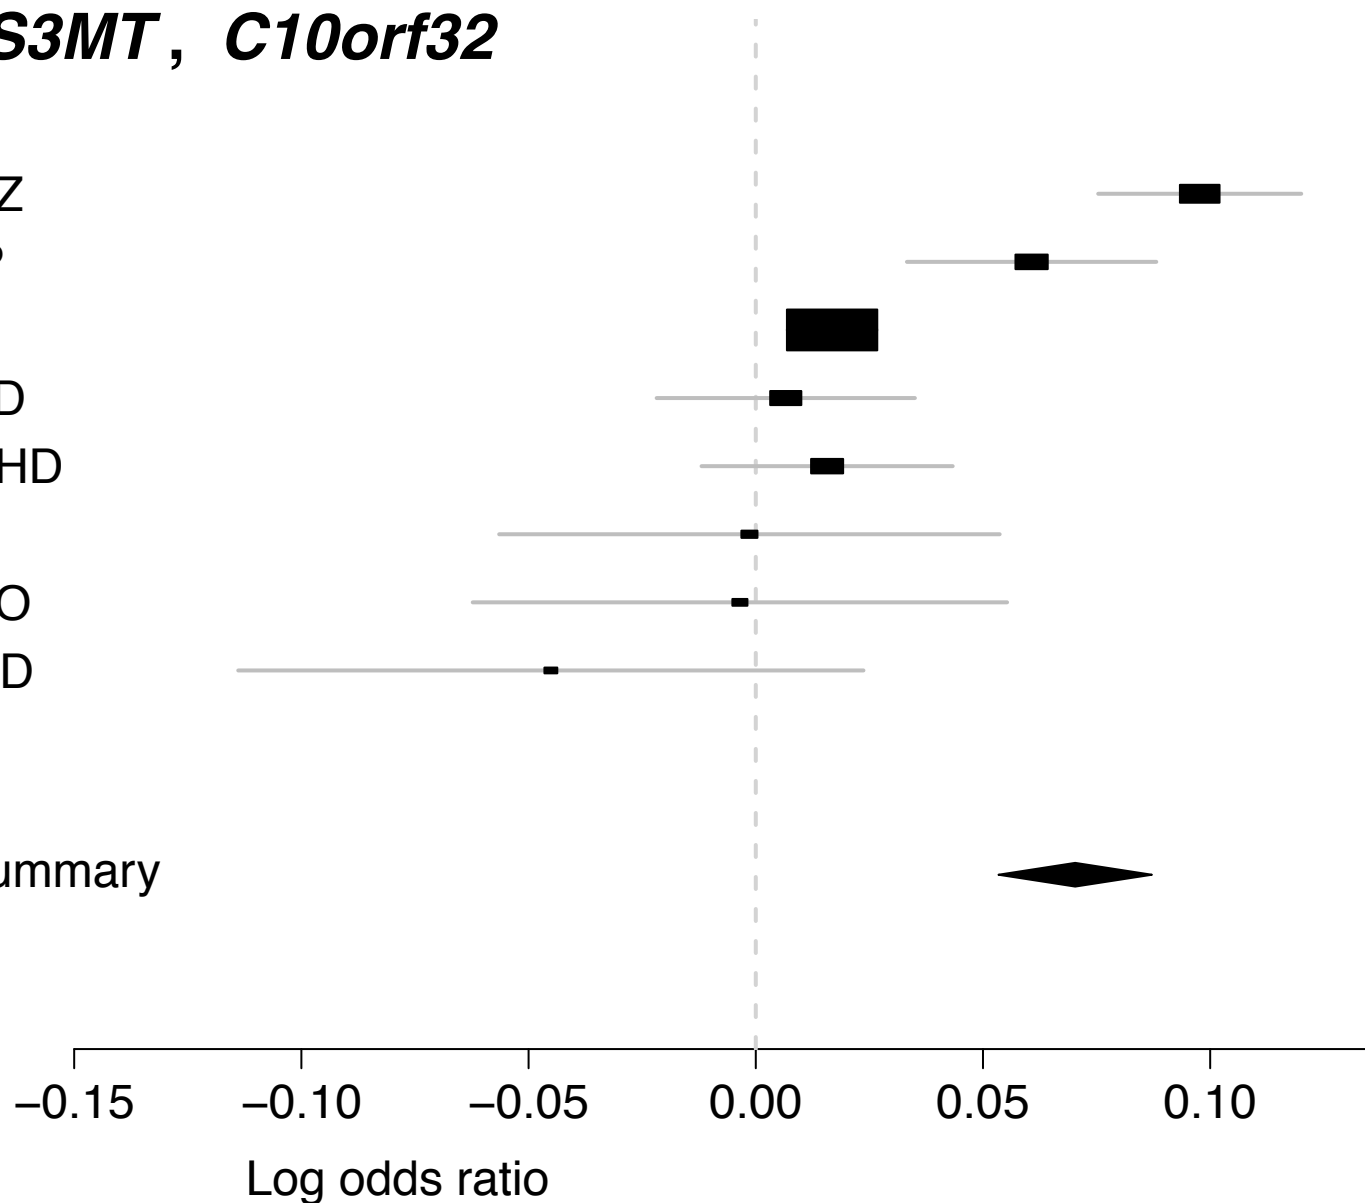

PM-Plot

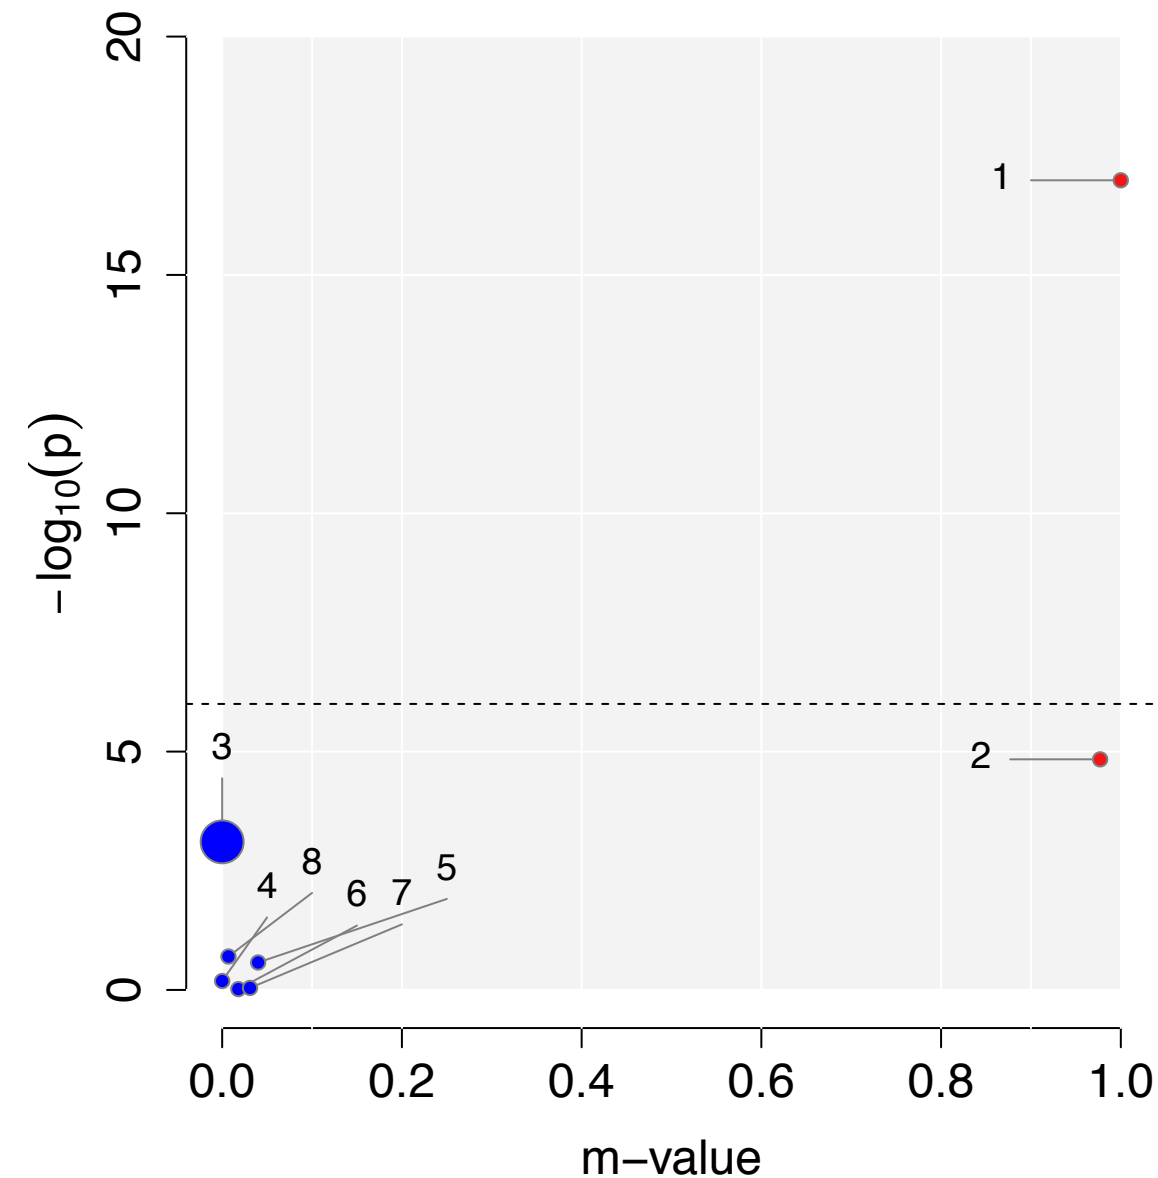

rs7193263 (Meta  $P = 5.59 \times 10^{-11}$ )

Gene : *RBFOX1*

GWAS P-value

- 0.0899 ● 1.SCZ
- 0.0003 ● 2.BIP
- $9.73 \times 10^{-9}$  ● 3.MD
- 0.0053 ● 4.ASD
- 0.0065 ● 5.ADHD
- 0.0851 ● 6.TS
- 0.9343 ● 7.ANO
- 0.1886 ● 8.OCD

FE summary

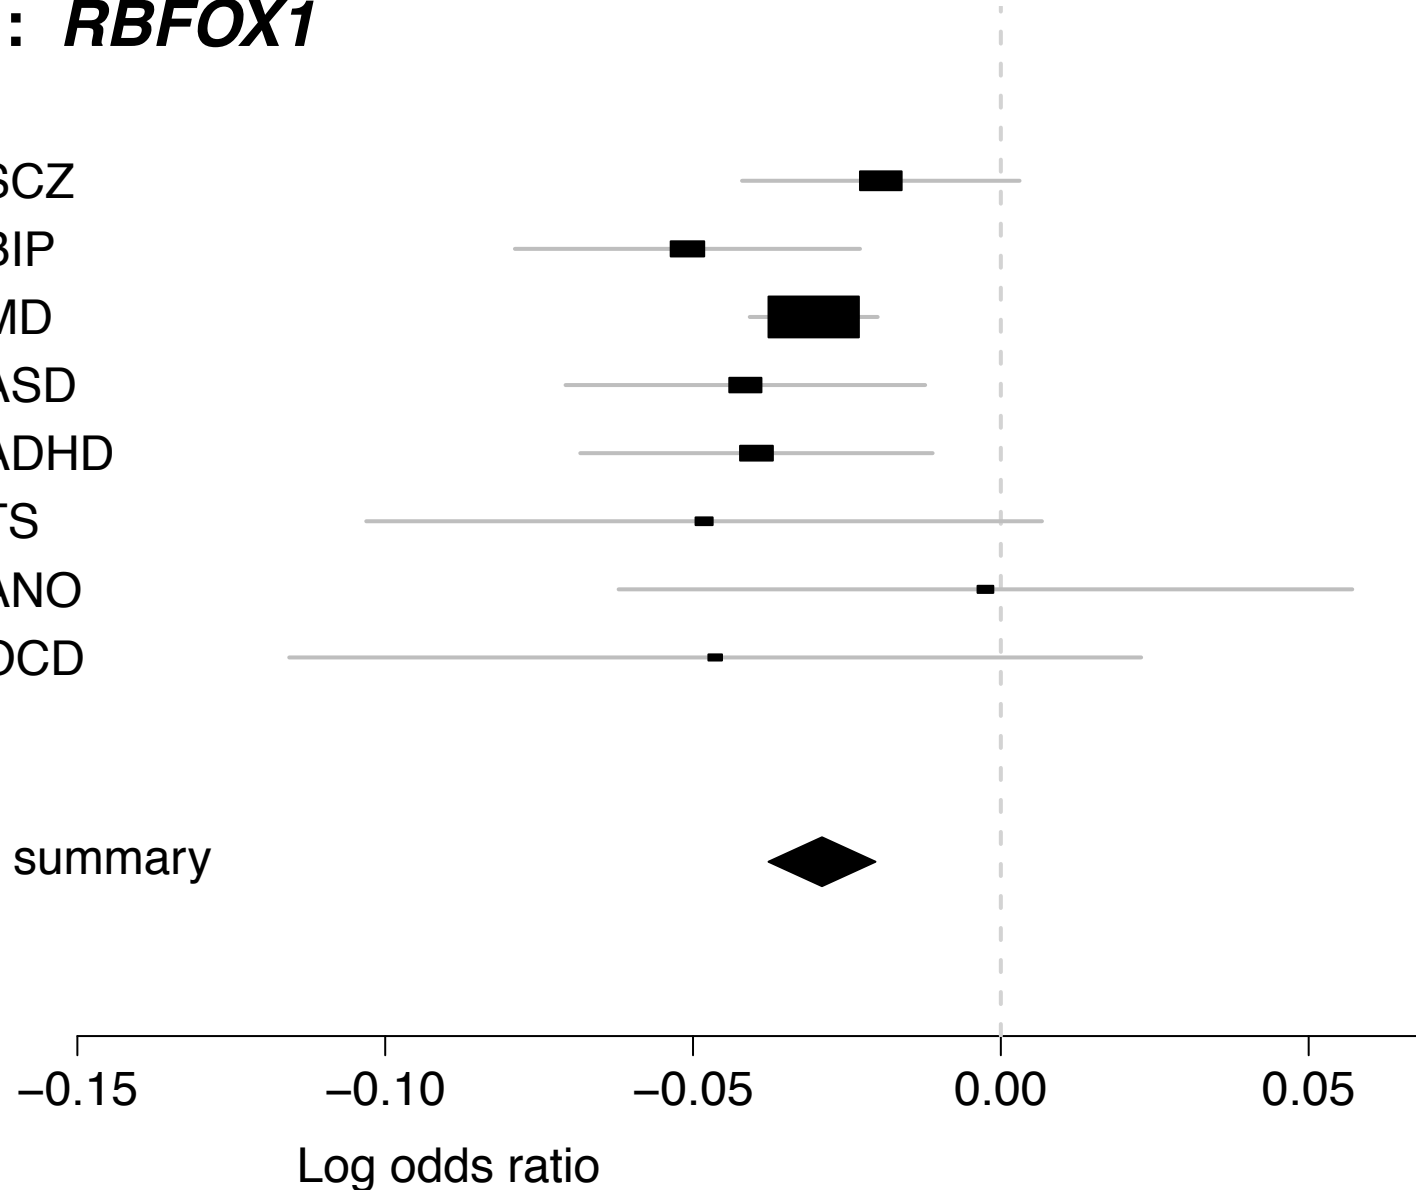

PM-Plot

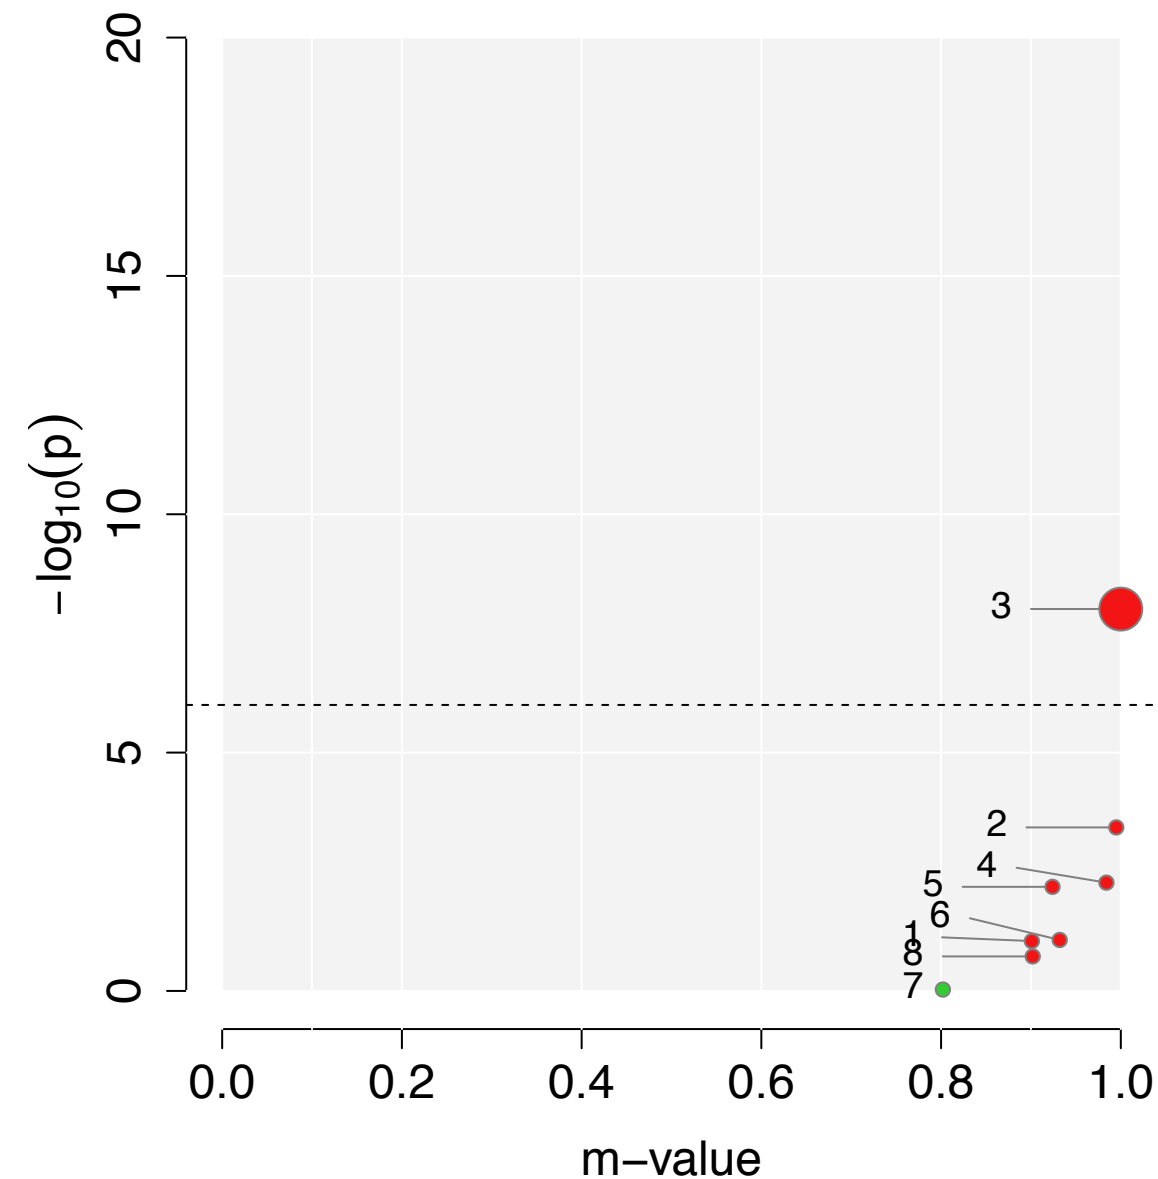



# rs7200826 (Meta $P = 1.35 \times 10^{-8}$ )

Gene : *SHISA9*

## GWAS P-value

- 0.2691 ● 1.SCZ
- 0.0011 ● 2.BIP
- $2.37 \times 10^{-8}$  ● 3.MD
- 0.8604 ● 4.ASD
- 0.1923 ● 5.ADHD
- 0.8050 ● 6.TS
- 0.0986 ● 7.ANO
- 0.5679 ● 8.OCD

FE summary

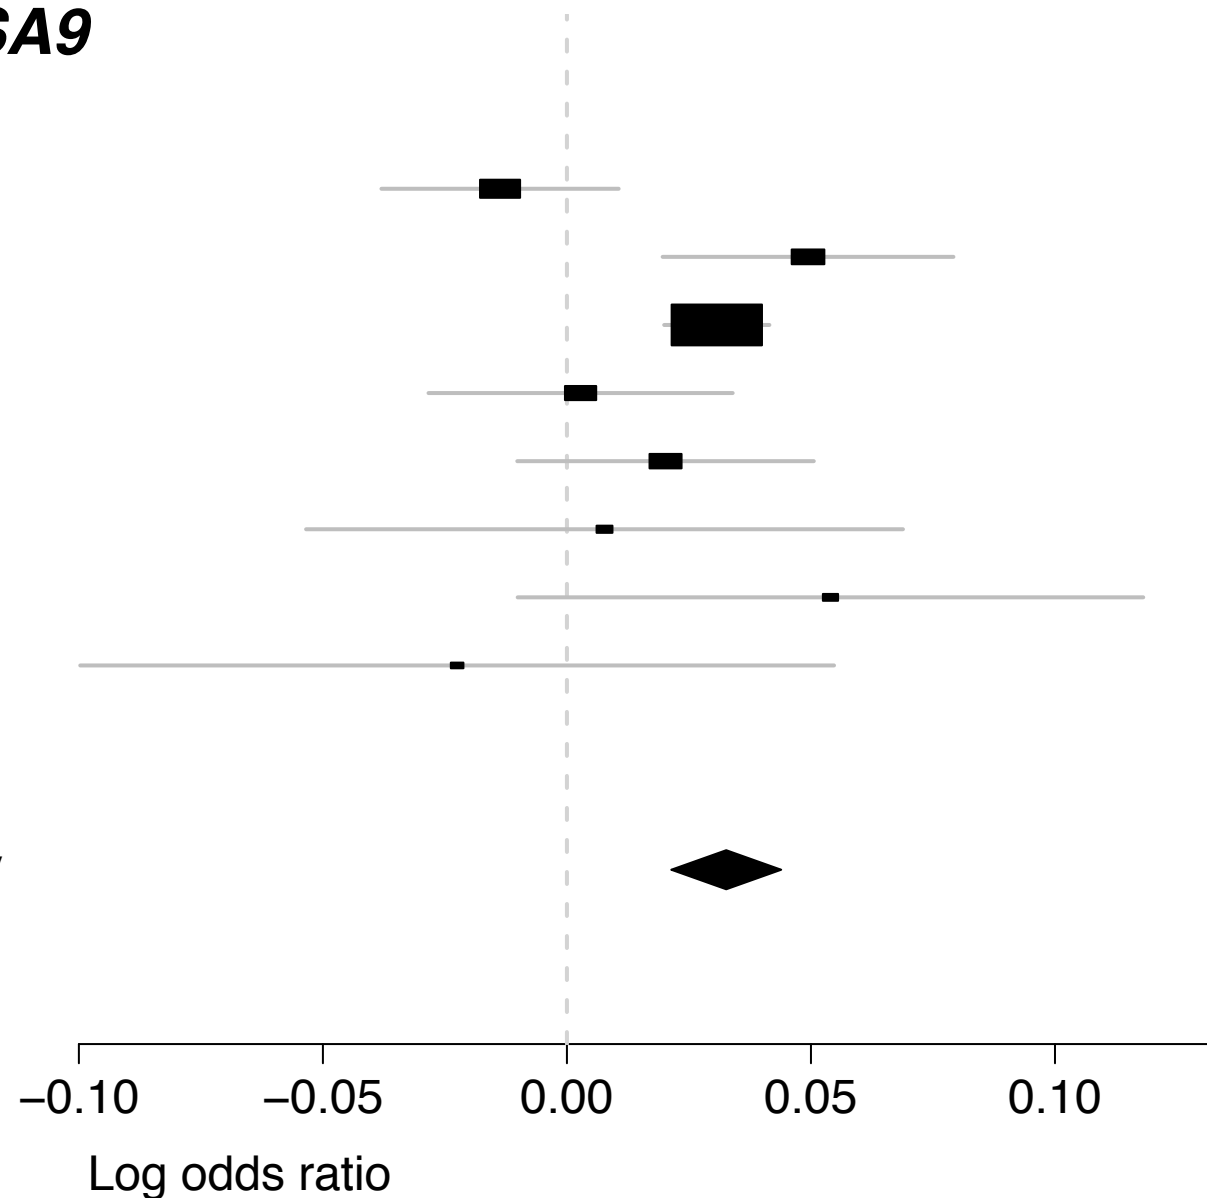

## PM-Plot

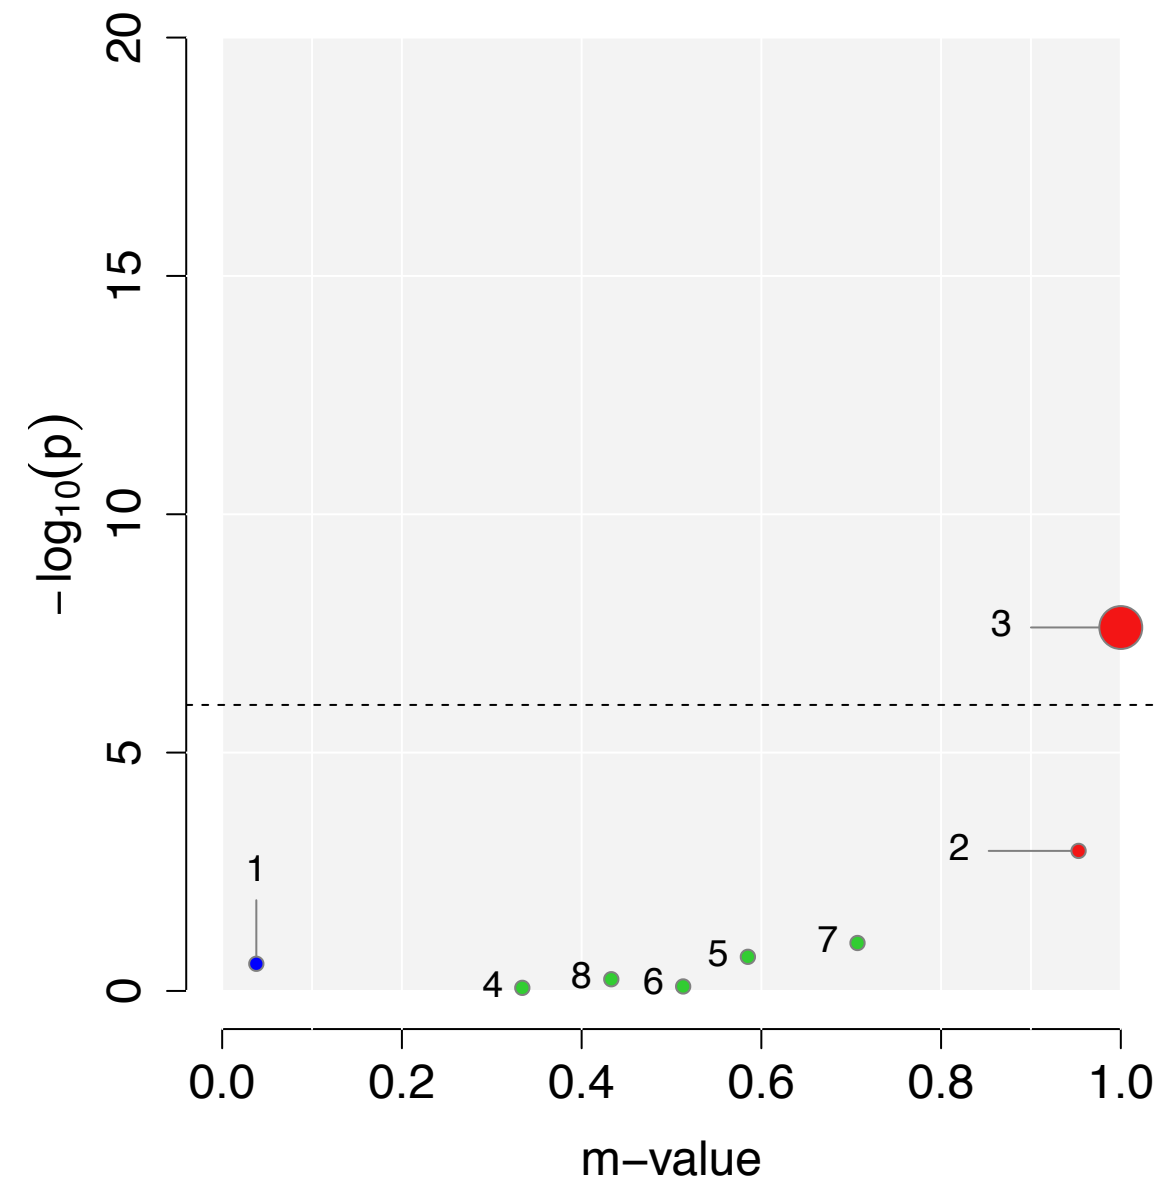

# rs7405404 (Meta $P = 1.29 \times 10^{-12}$ )

Gene : (>200kb)

## GWAS P-value

- 1.40 x 10<sup>-9</sup> ● 1.SCZ
- 0.0266 ● 2.BIP
- 1.51 x 10<sup>-7</sup> ● 3.MD
- 0.0005 ● 4.ASD
- 0.3262 ● 5.ADHD
- 0.4503 ● 6.TS
- 0.6465 ● 7.ANO
- 0.9736 ● 8.OCD

FE summary

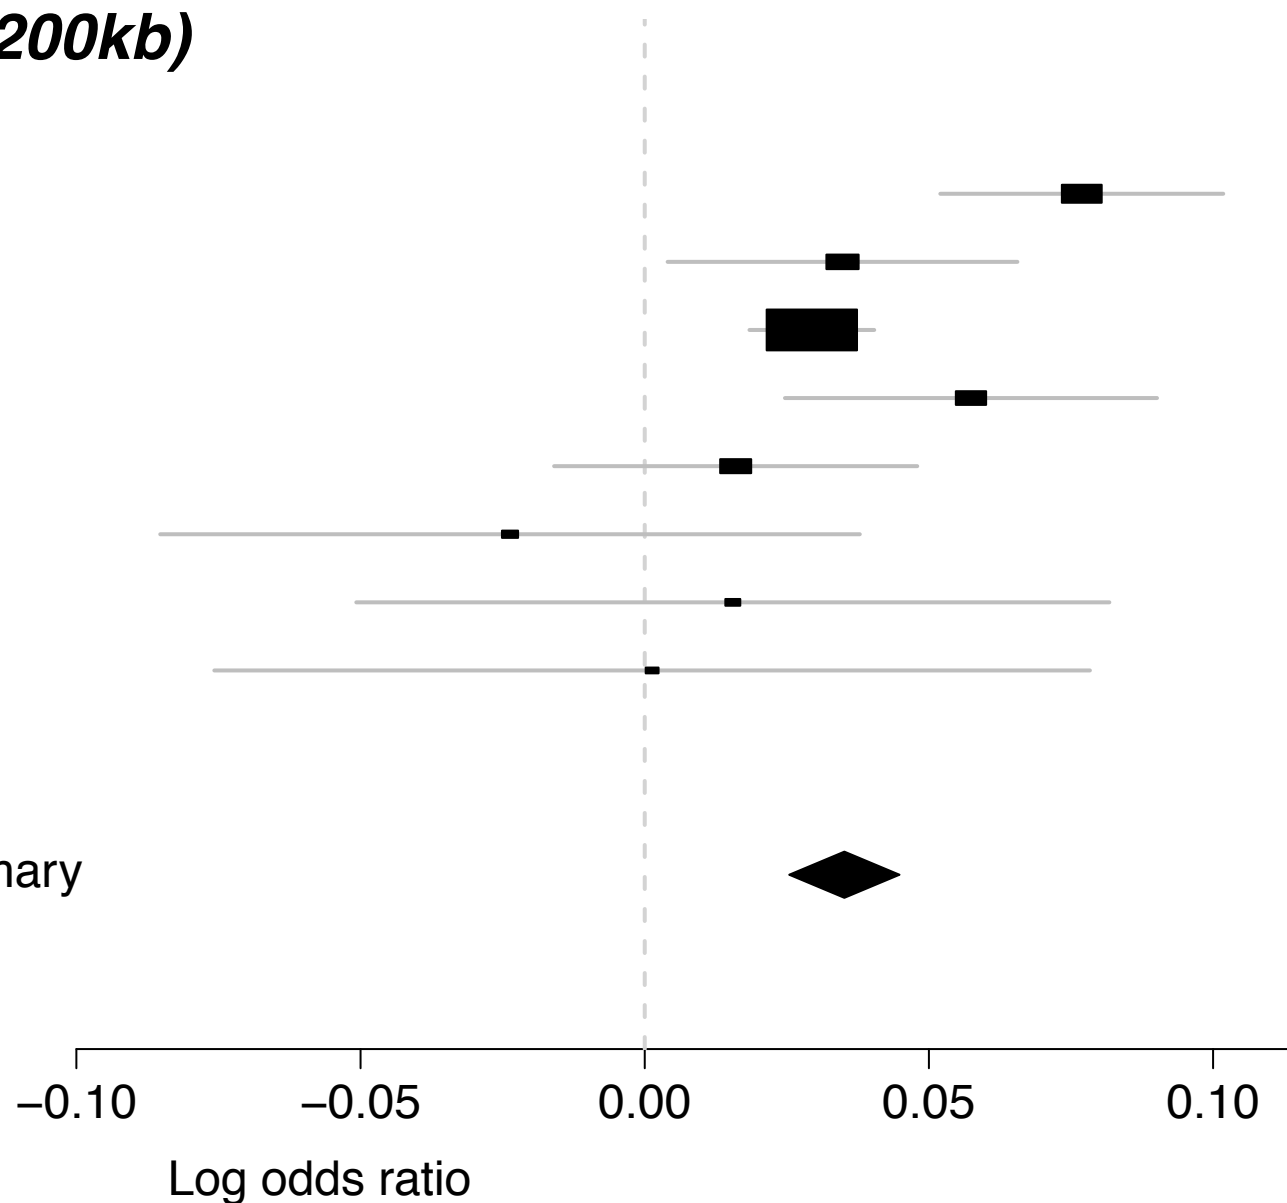

## PM-Plot

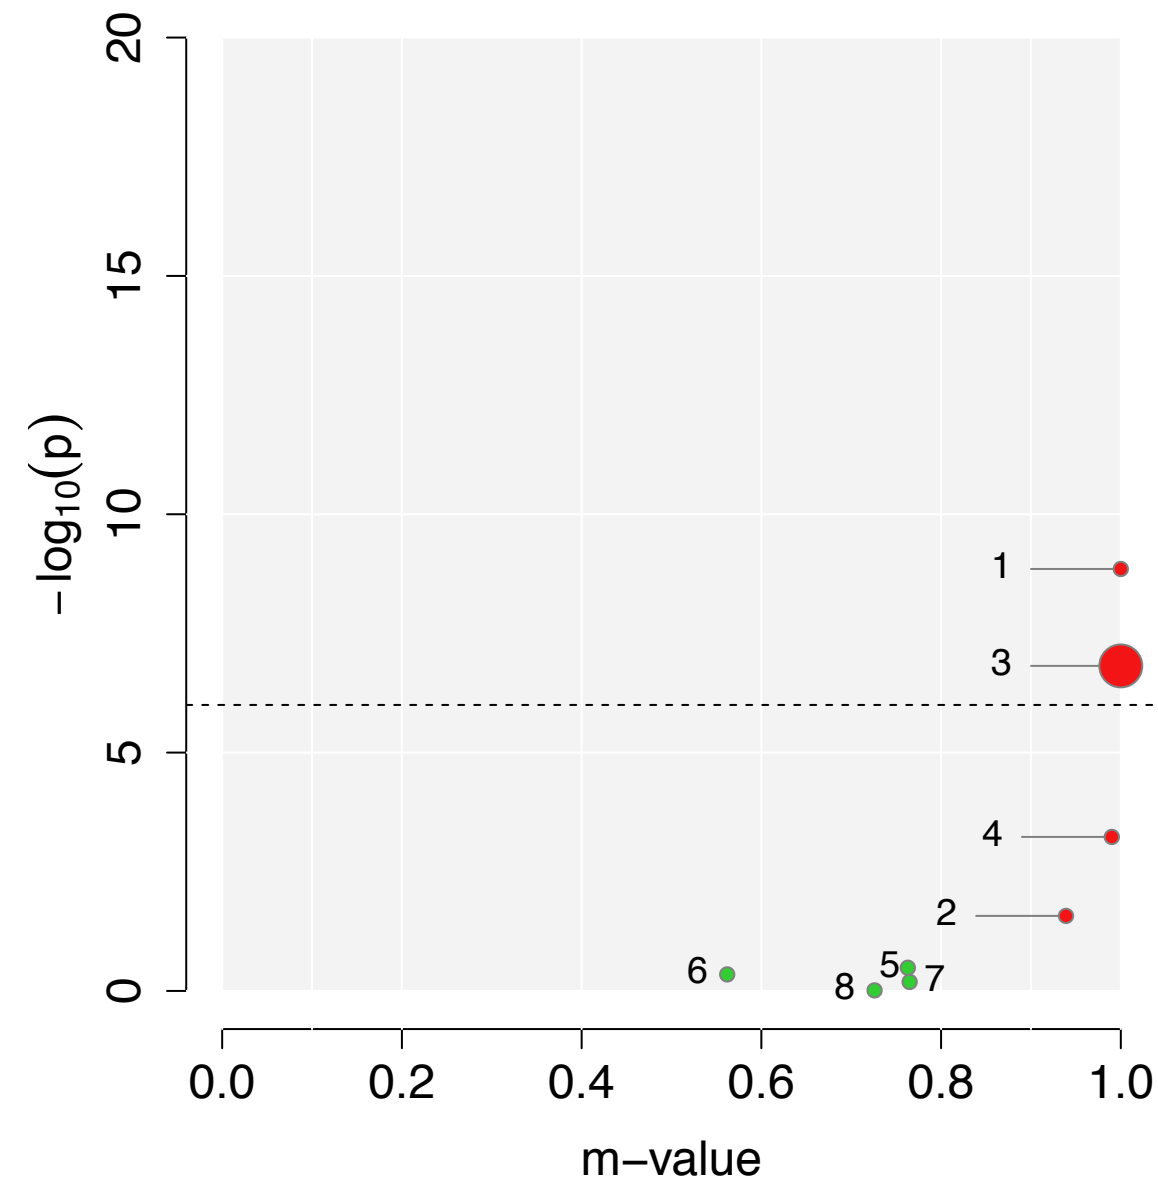

# rs7521492 (Meta $P = 1.23 \times 10^{-9}$ )

Gene : (>200kb)

## GWAS P-value

- $4.96 \times 10^{-7}$  ● 1.SCZ
- 0.0002 ● 2.BIP
- 0.0084 ● 3.MD
- 0.0018 ● 4.ASD
- 0.5969 ● 5.ADHD
- 0.0179 ● 6.TS
- 0.0334 ● 7.ANO
- 0.2464 ● 8.OCD

FE summary

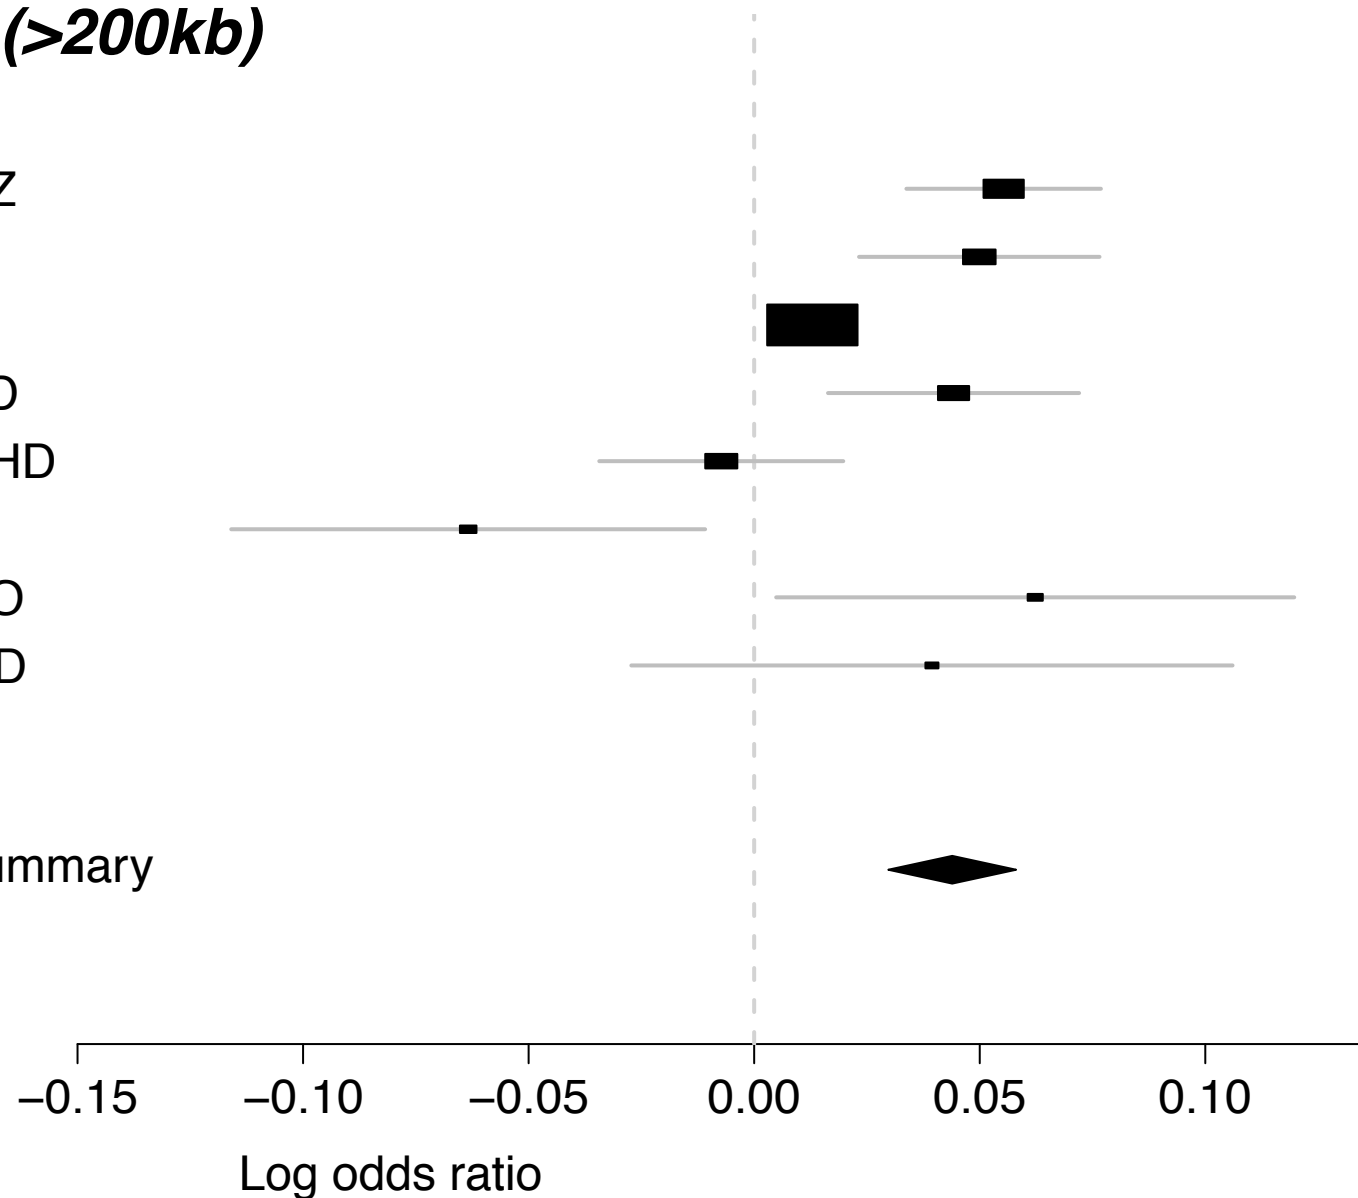

## PM-Plot

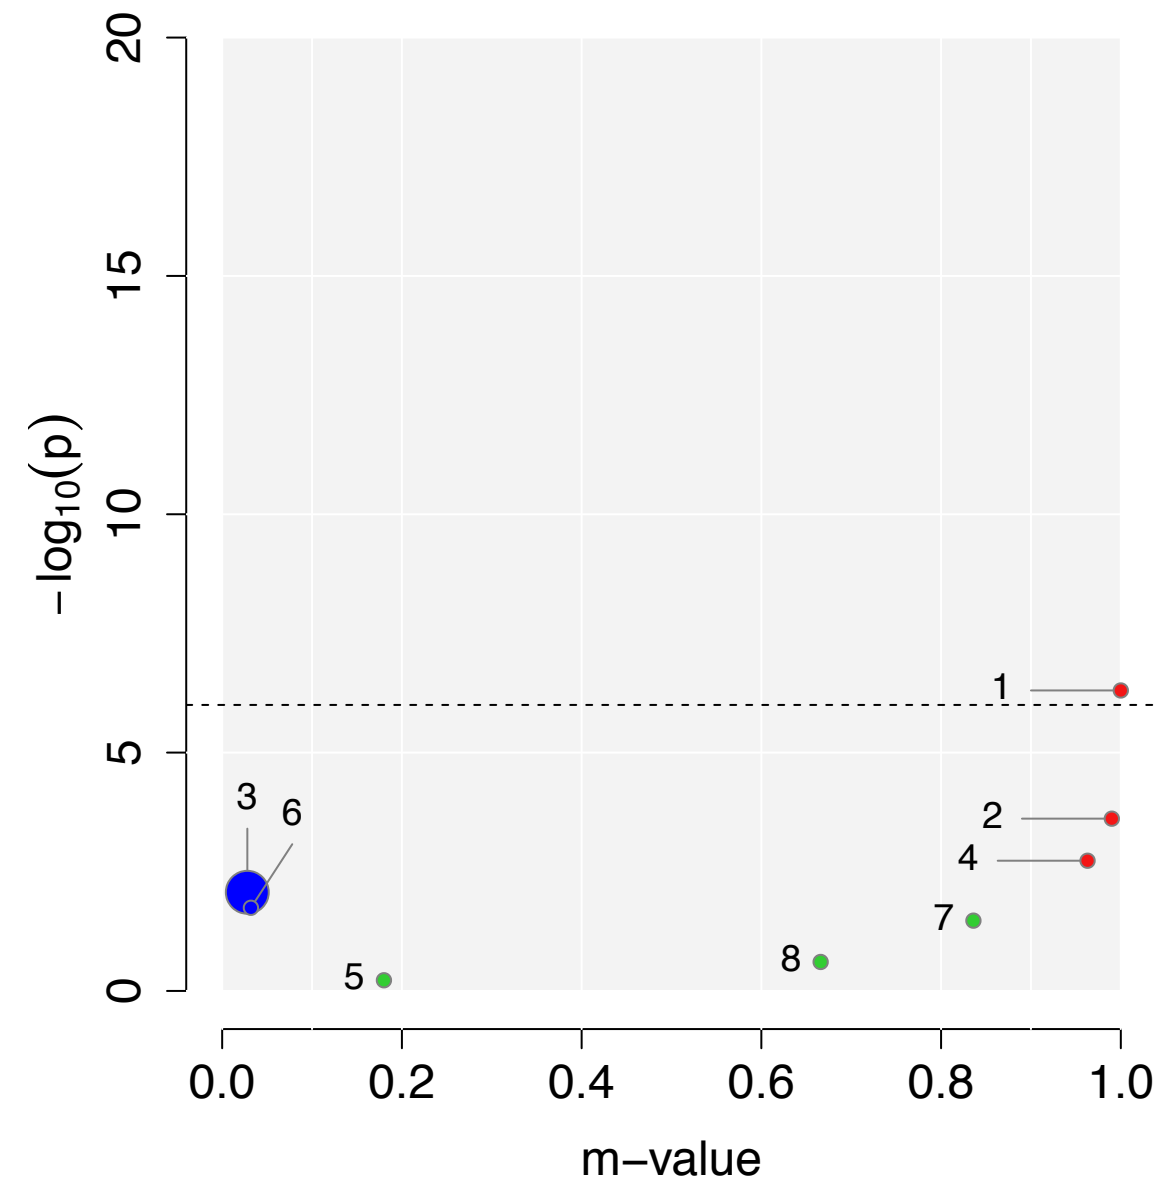

# rs7531118 (Meta $P = 1.02 \times 10^{-15}$ )

Gene : *NEGR1*

## GWAS P-value

- 0.0116 ● 1.SCZ
- 0.2404 ● 2.BIP
- $1.03 \times 10^{-14}$  ● 3.MD
- 0.0192 ● 4.ASD
- 0.6974 ● 5.ADHD
- 0.0905 ● 6.TS
- 0.0142 ● 7.ANO
- 0.3483 ● 8.OCD

FE summary

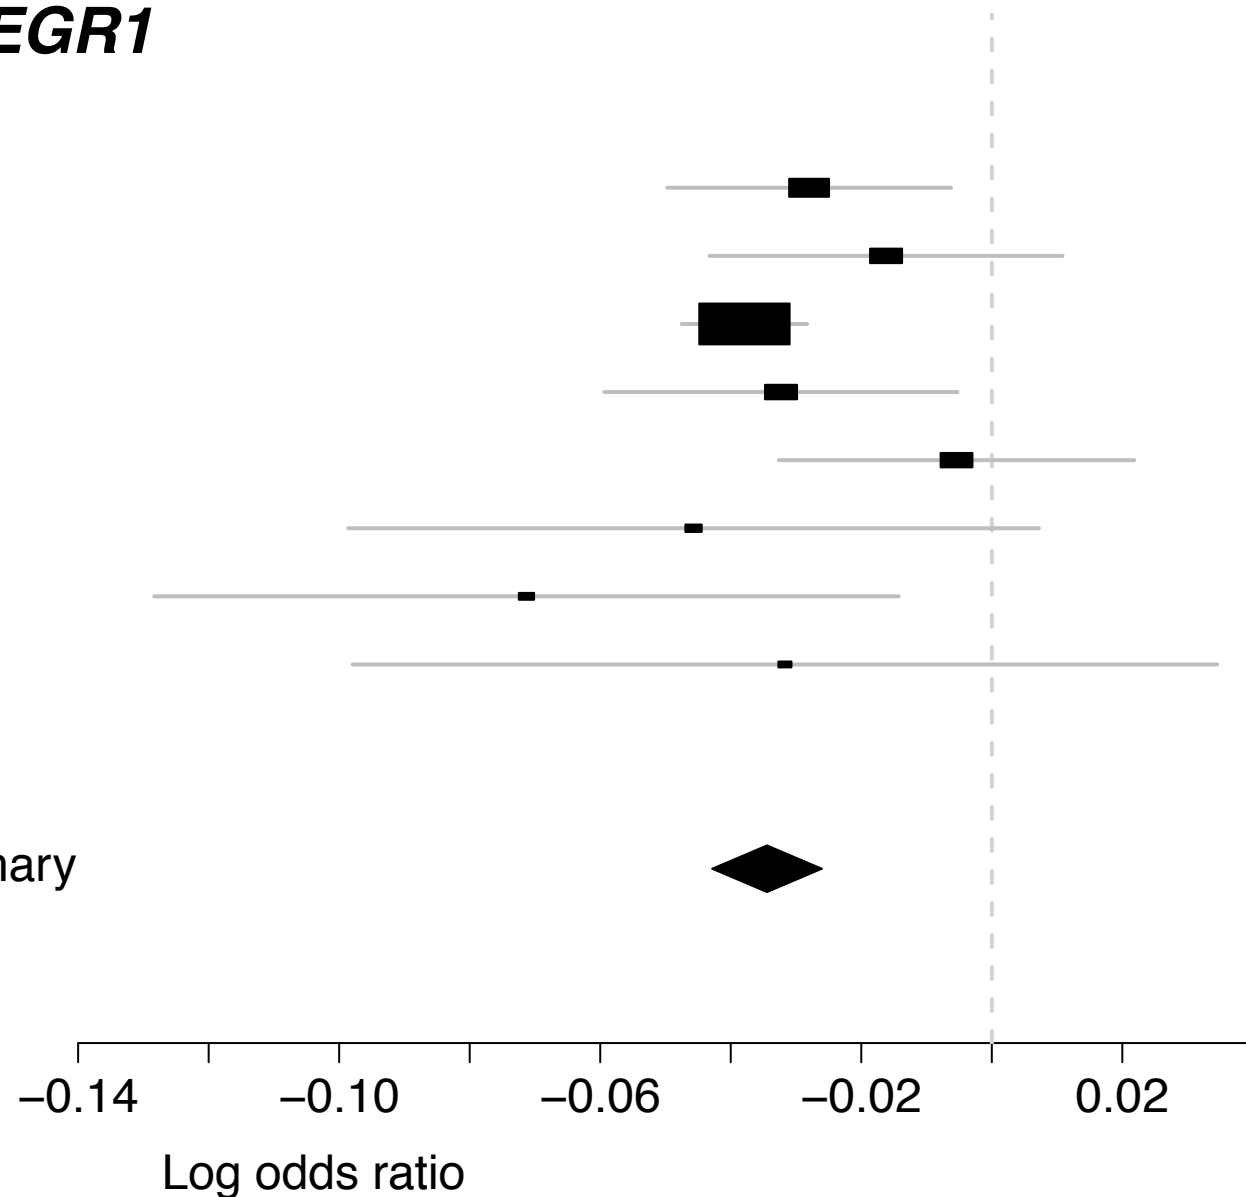

## PM-Plot

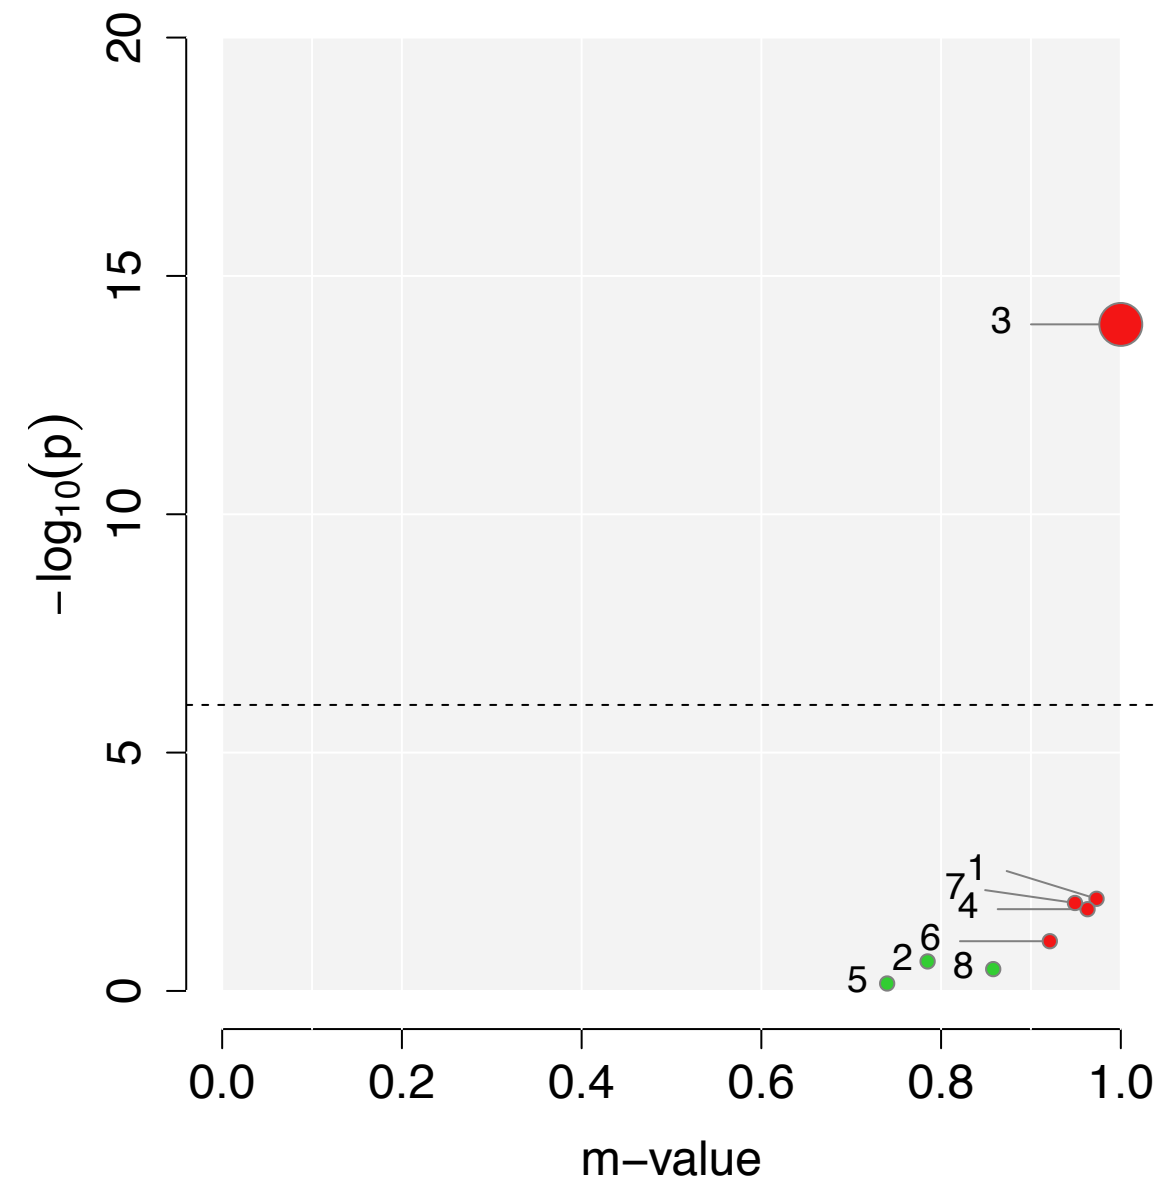

# rs7618871 (Meta $P = 1.48 \times 10^{-8}$ )

Gene : *STAG1*

## GWAS P-value

- 1.46 x 10<sup>-10</sup> ● 1.SCZ
- 0.9233 ● 2.BIP
- 0.3175 ● 3.MD
- 0.2245 ● 4.ASD
- 0.6537 ● 5.ADHD
- 0.5373 ● 6.TS
- 0.2977 ● 7.ANO
- 0.7433 ● 8.OCD

FE summary

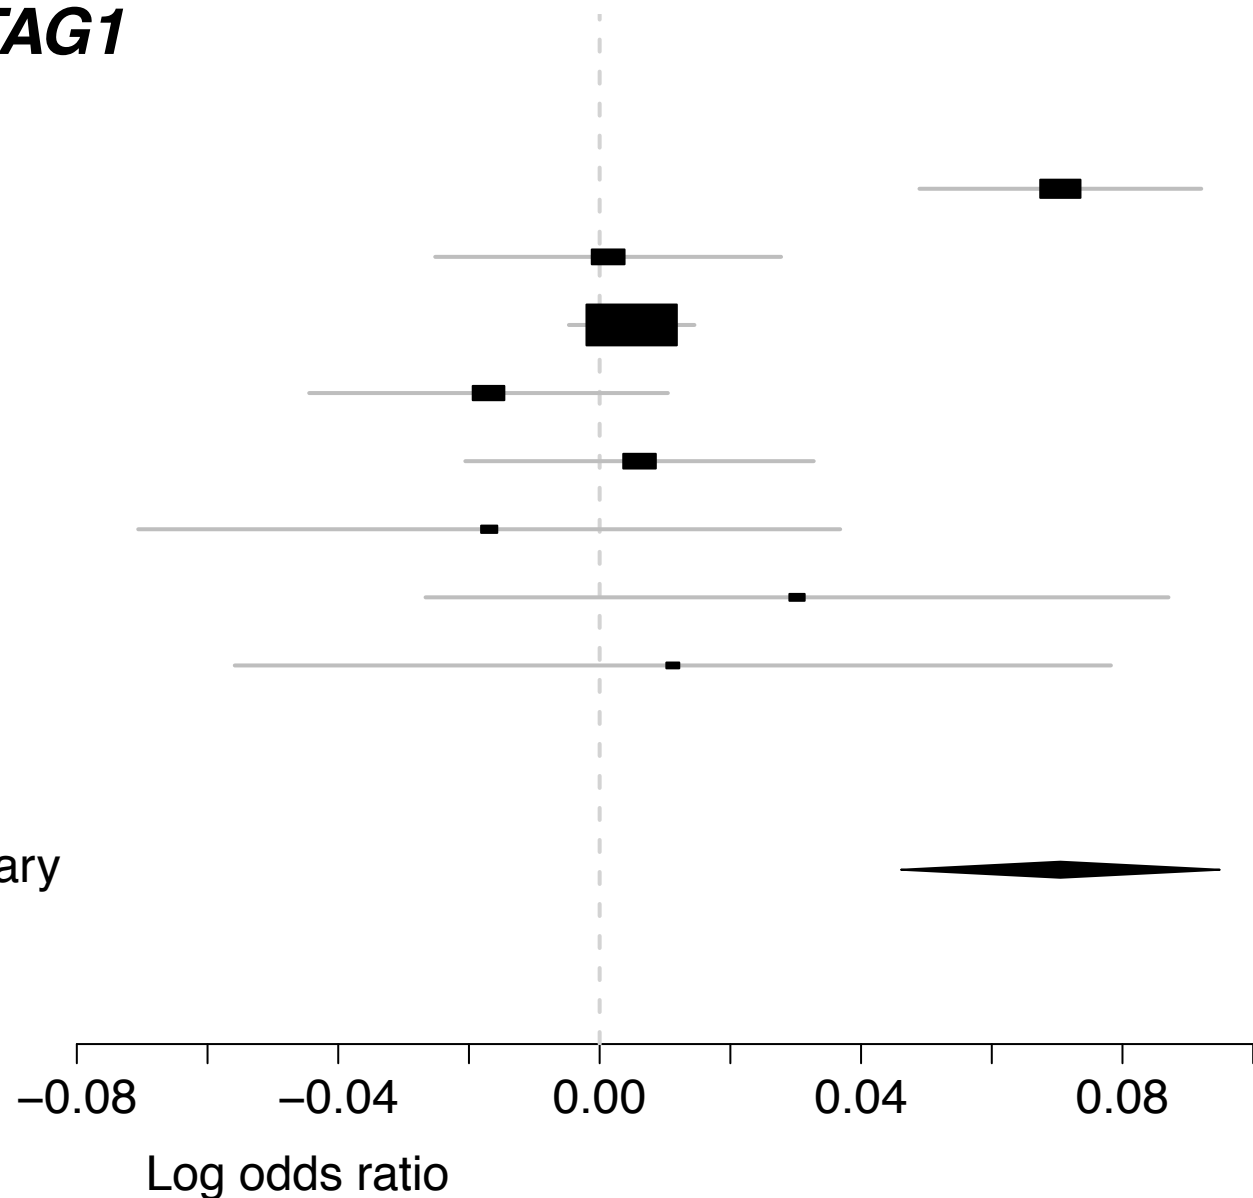

## PM-Plot

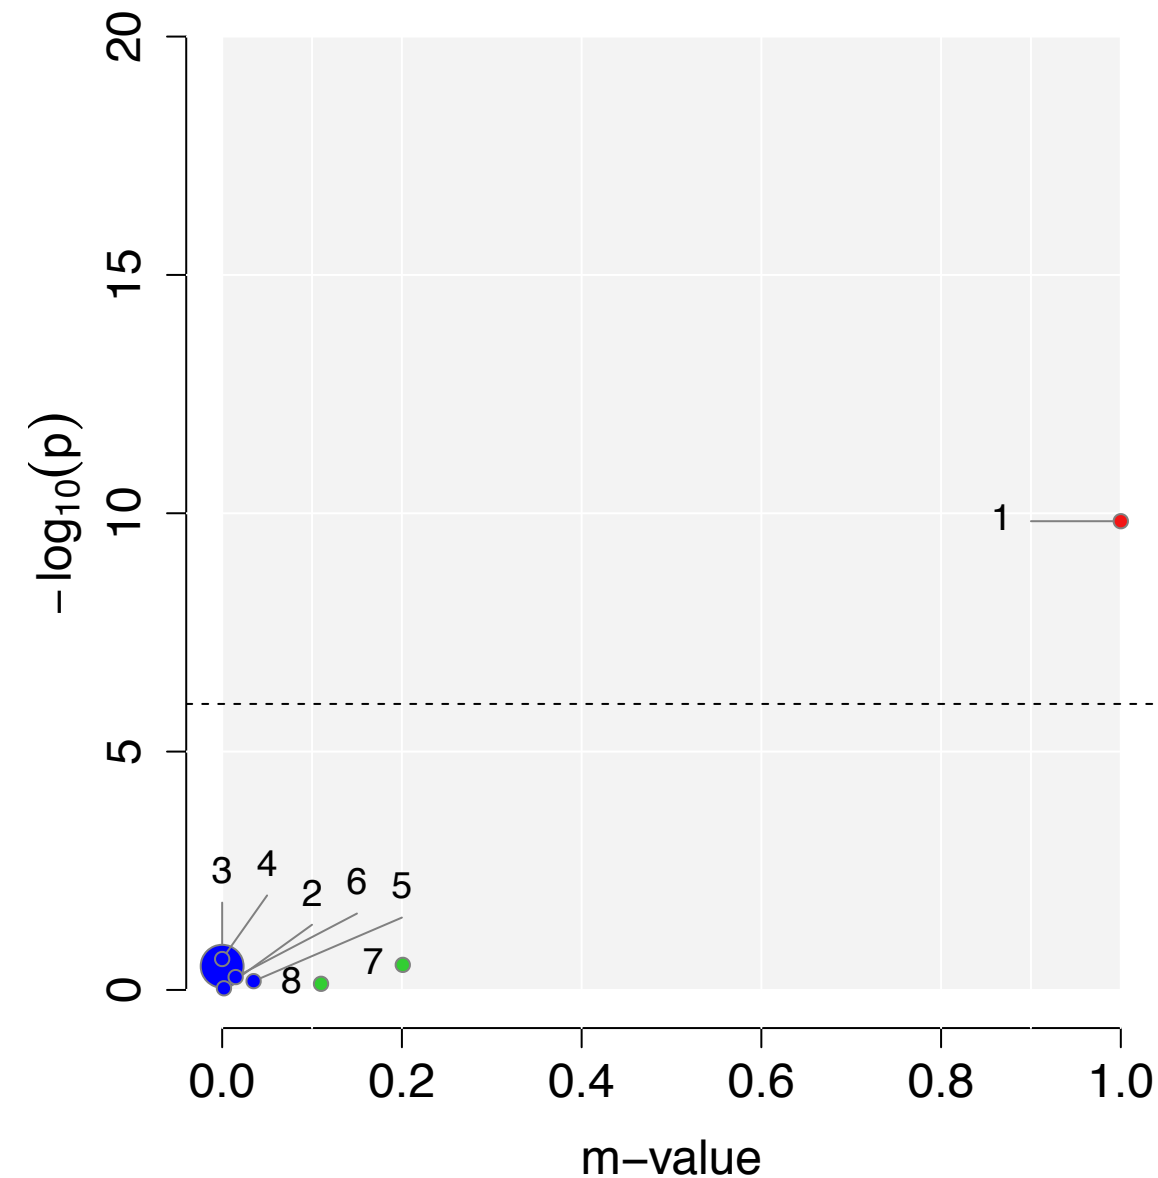

# rs7785663 (Meta $P = 2.7e \times 10^{-8}$ )

Gene : *DGKI*, *PTN*

## GWAS P-value

- $4.85 \times 10^{-8}$  ● 1.SCZ
- 0.0002 ● 2.BIP
- 0.4589 ● 3.MD
- 0.0386 ● 4.ASD
- 0.1817 ● 5.ADHD
- 0.7940 ● 6.TS
- 0.3709 ● 7.ANO
- 0.1790 ● 8.OCD

FE summary

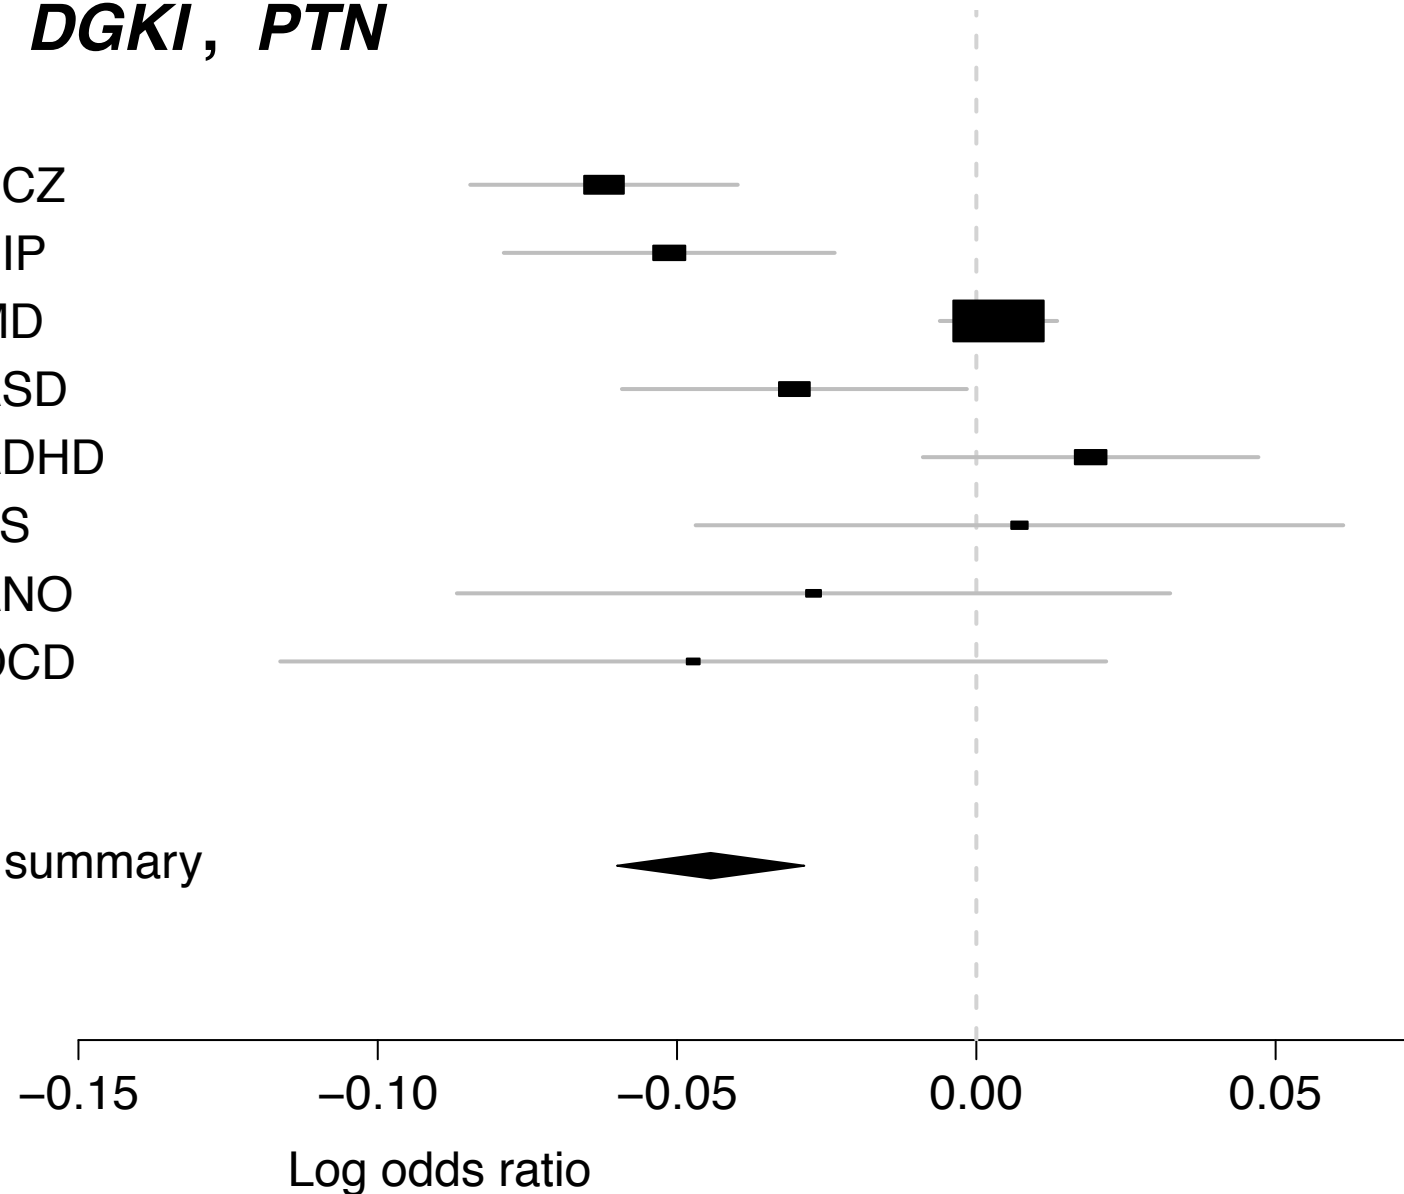

## PM-Plot

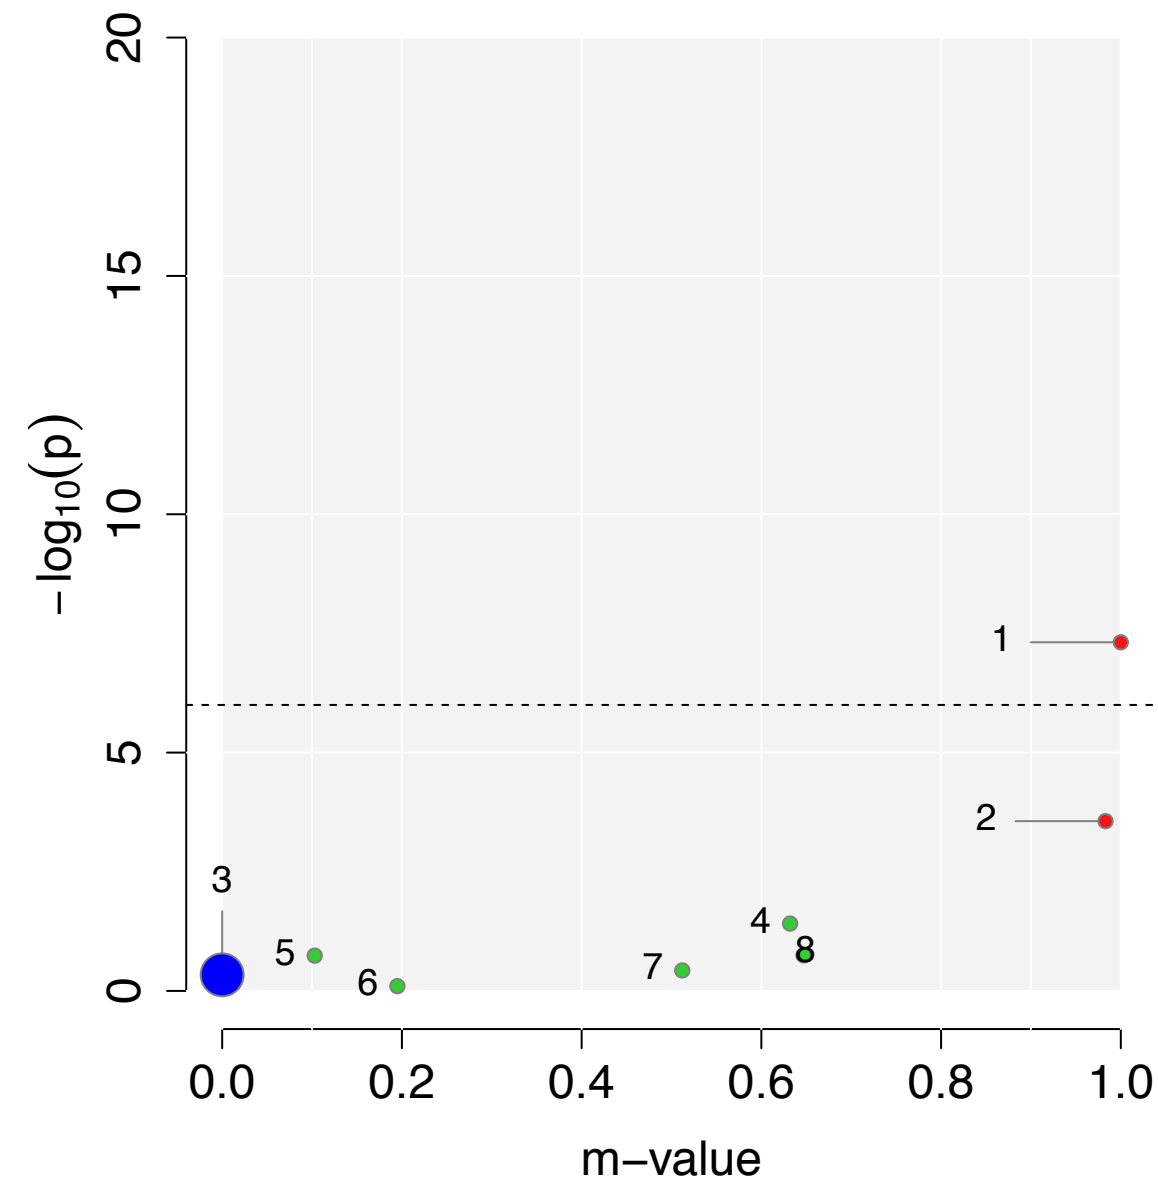

# rs7968921 (Meta $P = 4.67 \times 10^{-8}$ )

Gene : **SOX5**

## GWAS P-value

- 0.0010 ● 1.SCZ
- 0.9881 ● 2.BIP
- $7.17 \times 10^{-8}$  ● 3.MD
- 0.5951 ● 4.ASD
- 0.3424 ● 5.ADHD
- 0.9559 ● 6.TS
- 0.4265 ● 7.ANO
- 0.9575 ● 8.OCD

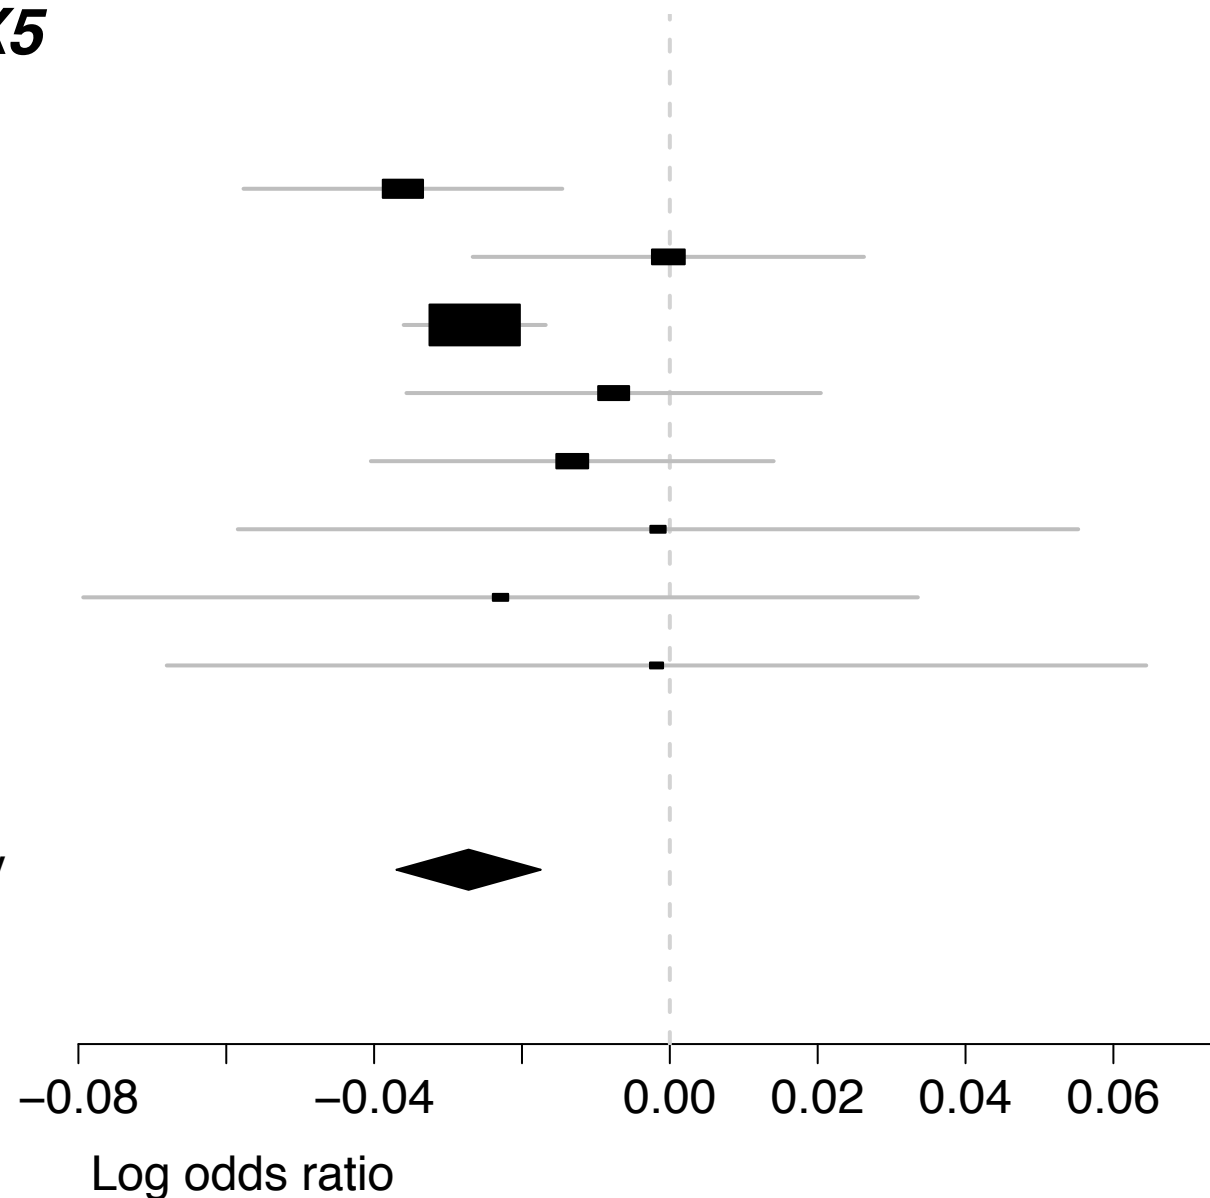

## PM-Plot

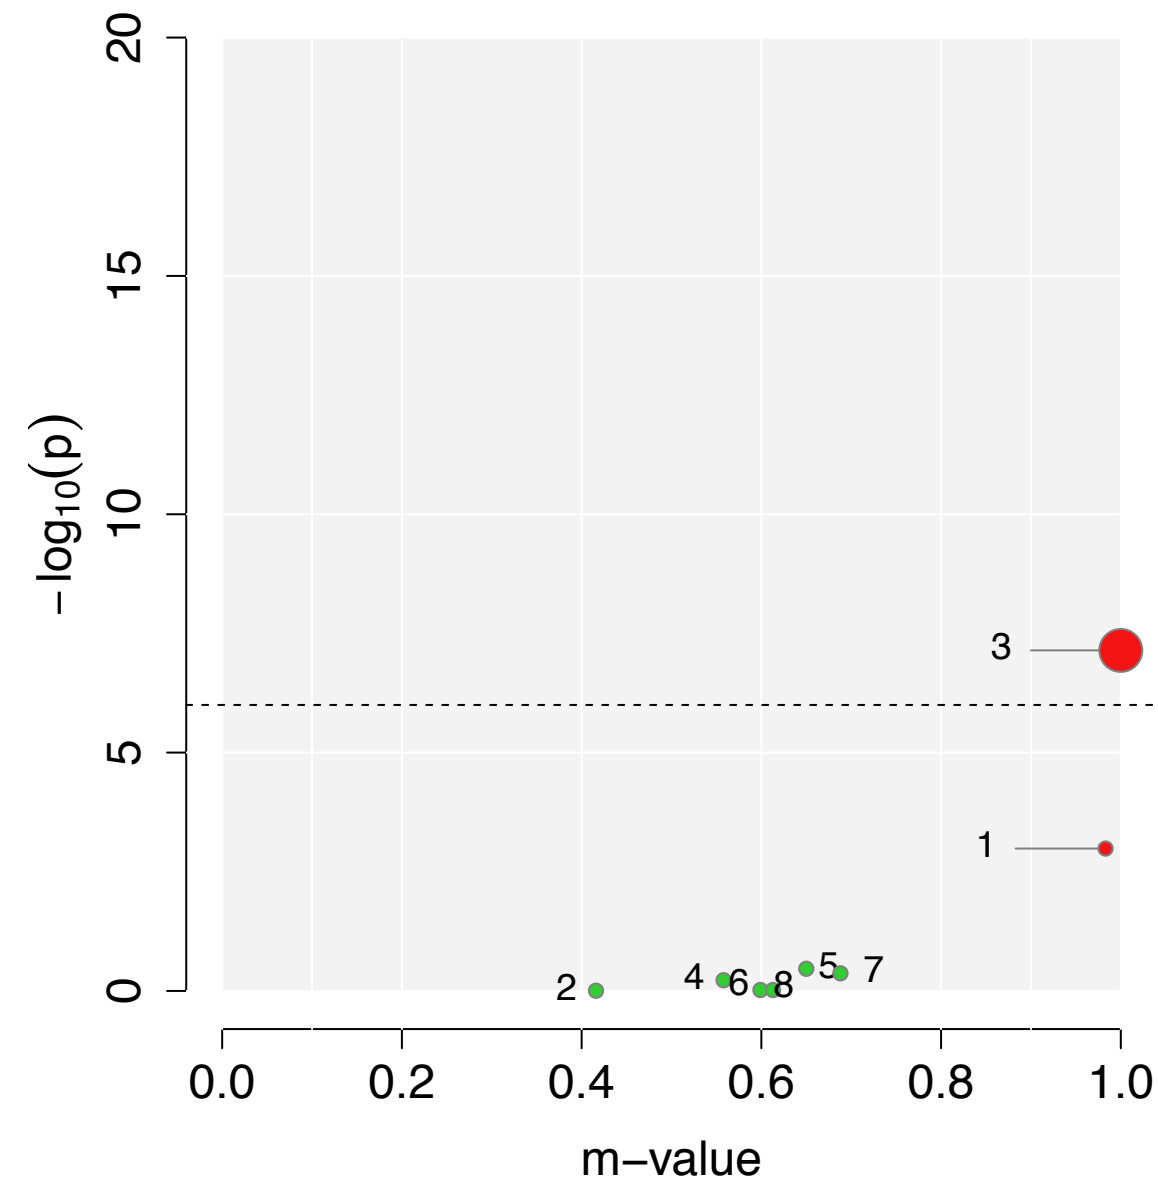

rs8054556 (Meta  $P = 3.75 \times 10^{-11}$ )

Gene : *TMEM219*, *KCTD13*

GWAS P-value

- 4.67 x 10<sup>-10</sup> ● 1.SCZ
- 0.0002 ● 2.BIP
- 0.0637 ● 3.MD
- 0.0179 ● 4.ASD
- 0.2509 ● 5.ADHD
- 0.5807 ● 6.TS
- 0.6785 ● 7.ANO
- 0.0022 ● 8.OCD

FE summary

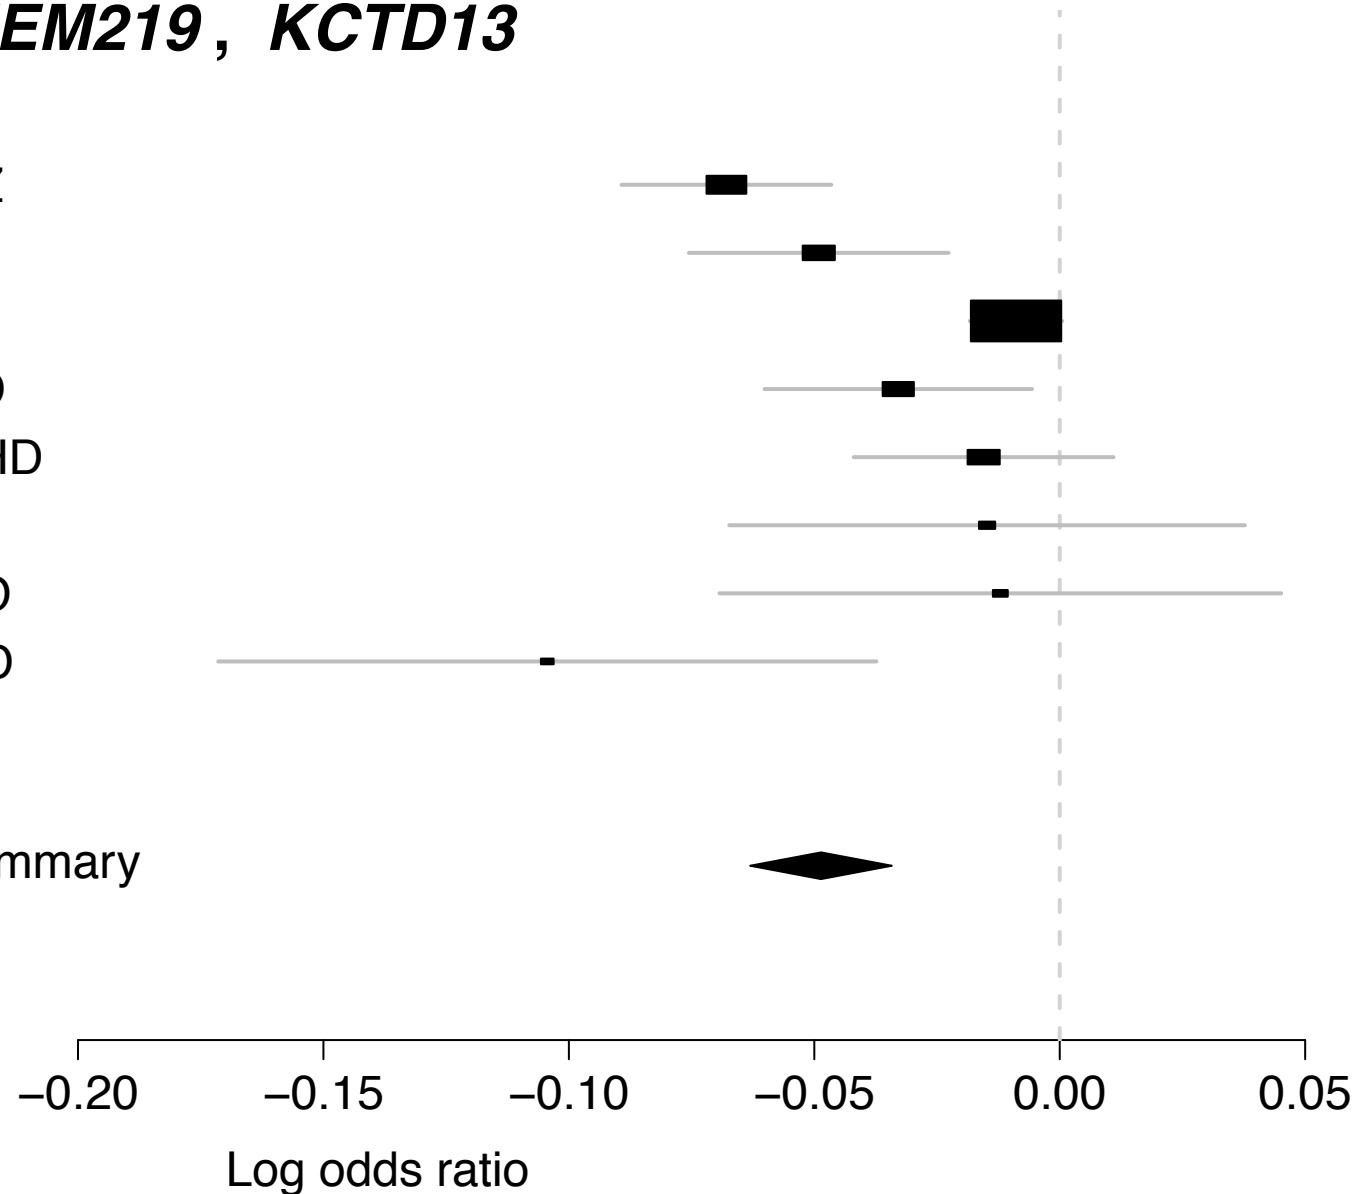

PM-Plot

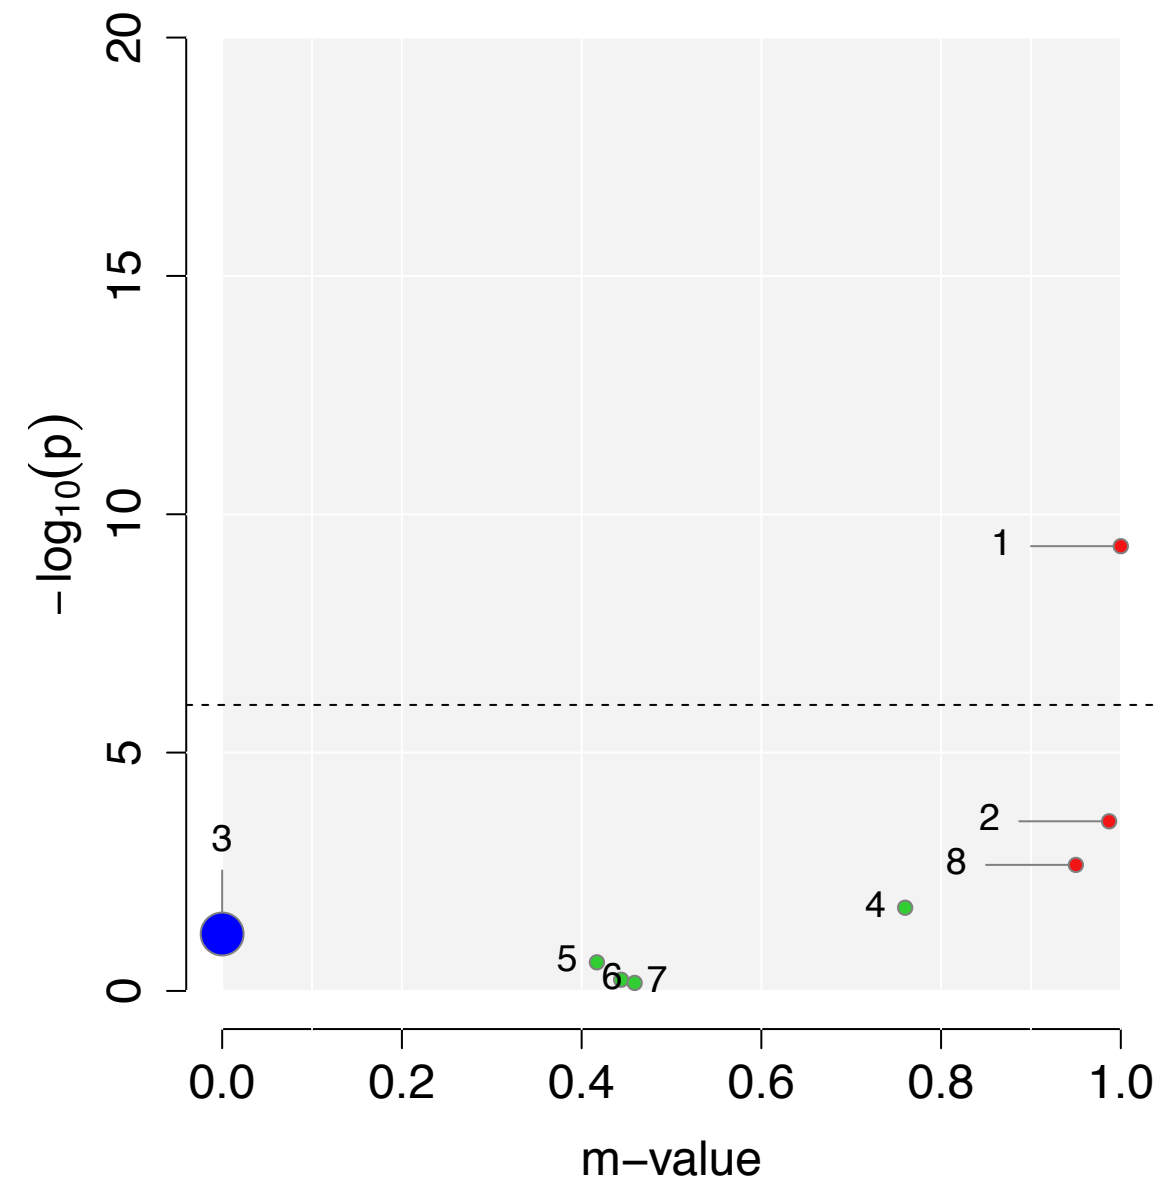



# rs8066384 (Meta $P = 3.22 \times 10^{-8}$ )

Gene : *RPTOR*

## GWAS P-value

- 1.97 x 10<sup>-6</sup> ● 1.SCZ
- 4.04 x 10<sup>-5</sup> ● 2.BIP
- 0.0636 ● 3.MD
- 0.1969 ● 4.ASD
- 0.2100 ● 5.ADHD
- 0.4720 ● 6.TS
- 0.0419 ● 7.ANO
- 0.0337 ● 8.OCD

FE summary

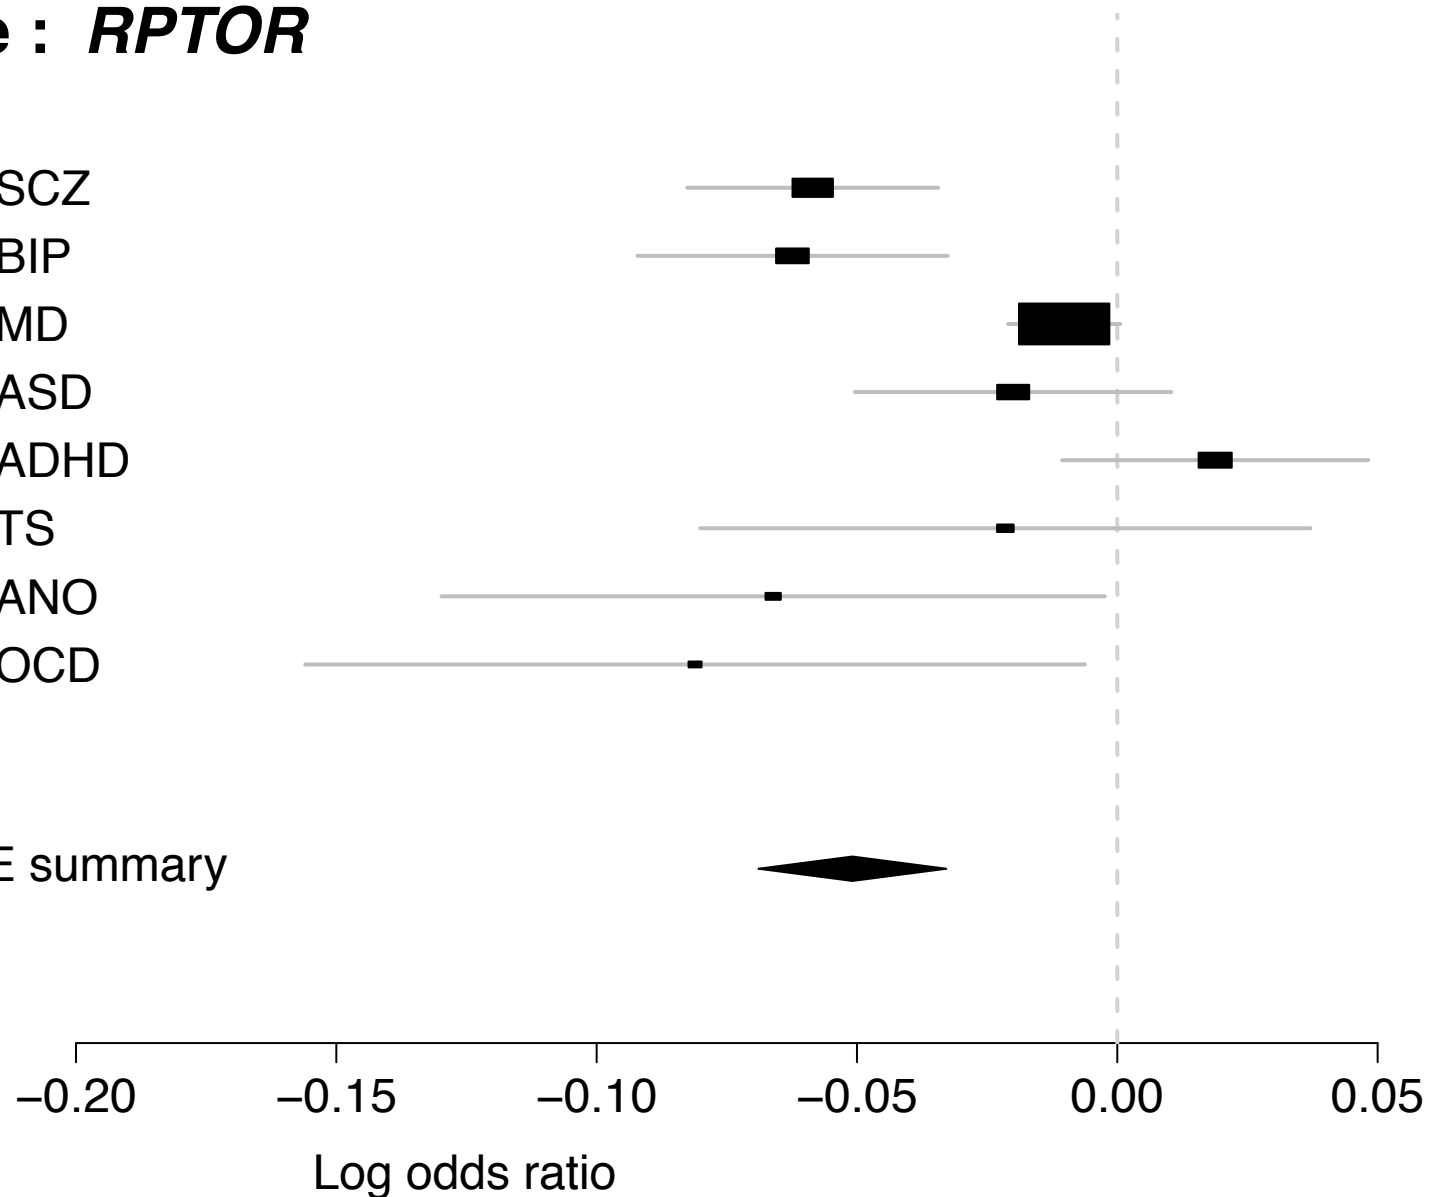

## PM-Plot

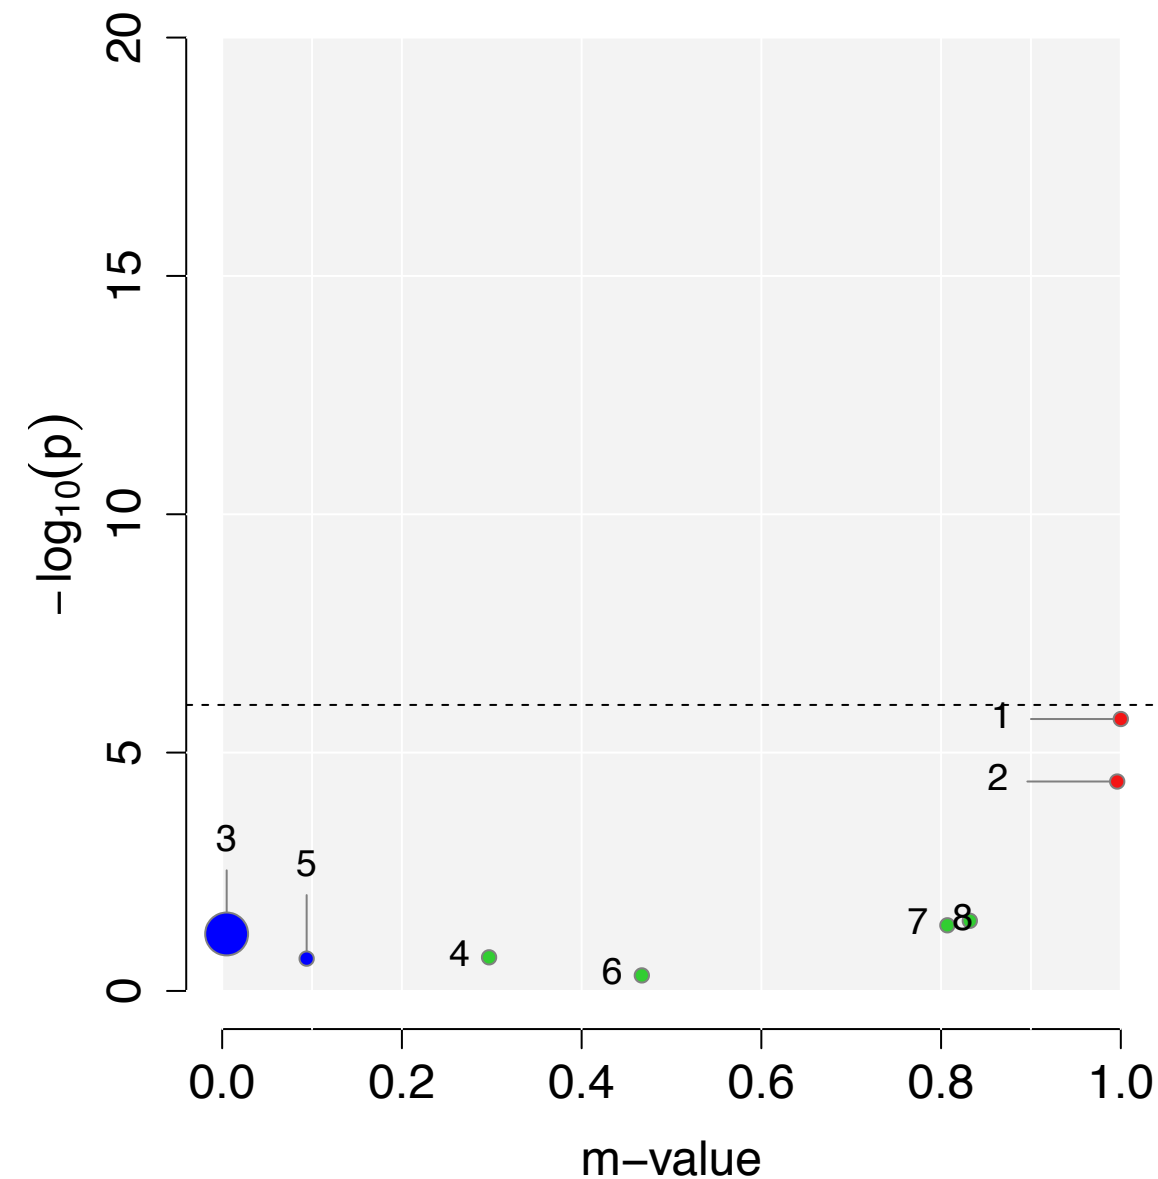

# rs8084351 (Meta $P = 4.26 \times 10^{-12}$ )

Gene : *DCC*

## GWAS P-value

- 3.80 x 10<sup>-5</sup> ● 1.SCZ
- 0.0365 ● 2.BIP
- 4.26 x 10<sup>-8</sup> ● 3.MD
- 0.0292 ● 4.ASD
- 0.0004 ● 5.ADHD
- 0.0017 ● 6.TS
- 0.3089 ● 7.ANO
- 0.0406 ● 8.OCD

FE summary

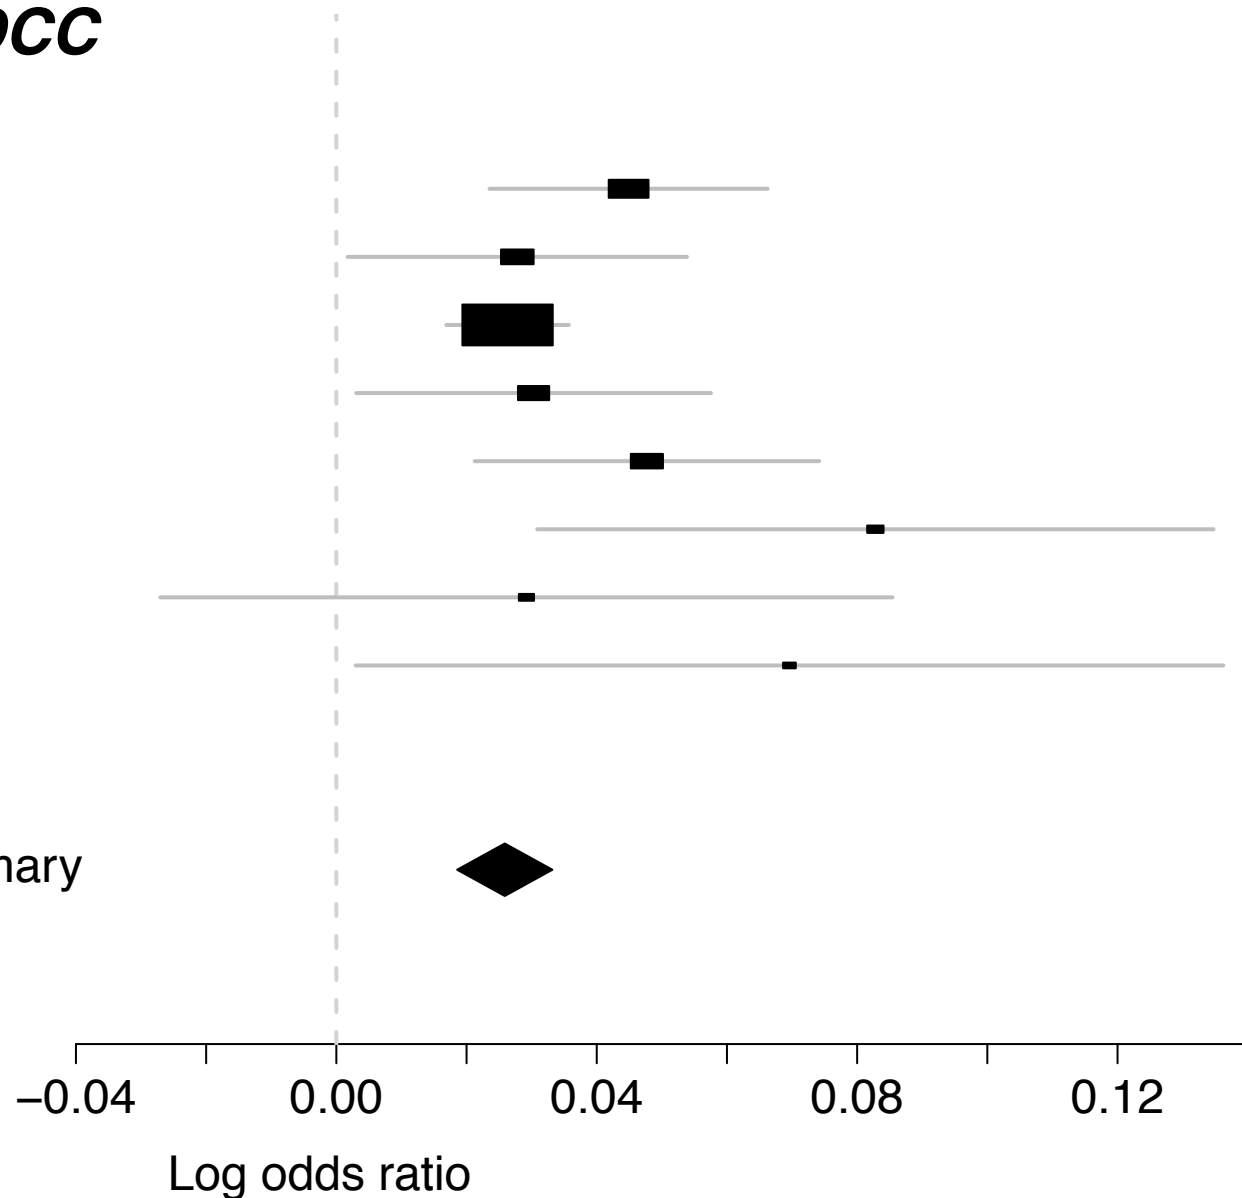

## PM-Plot

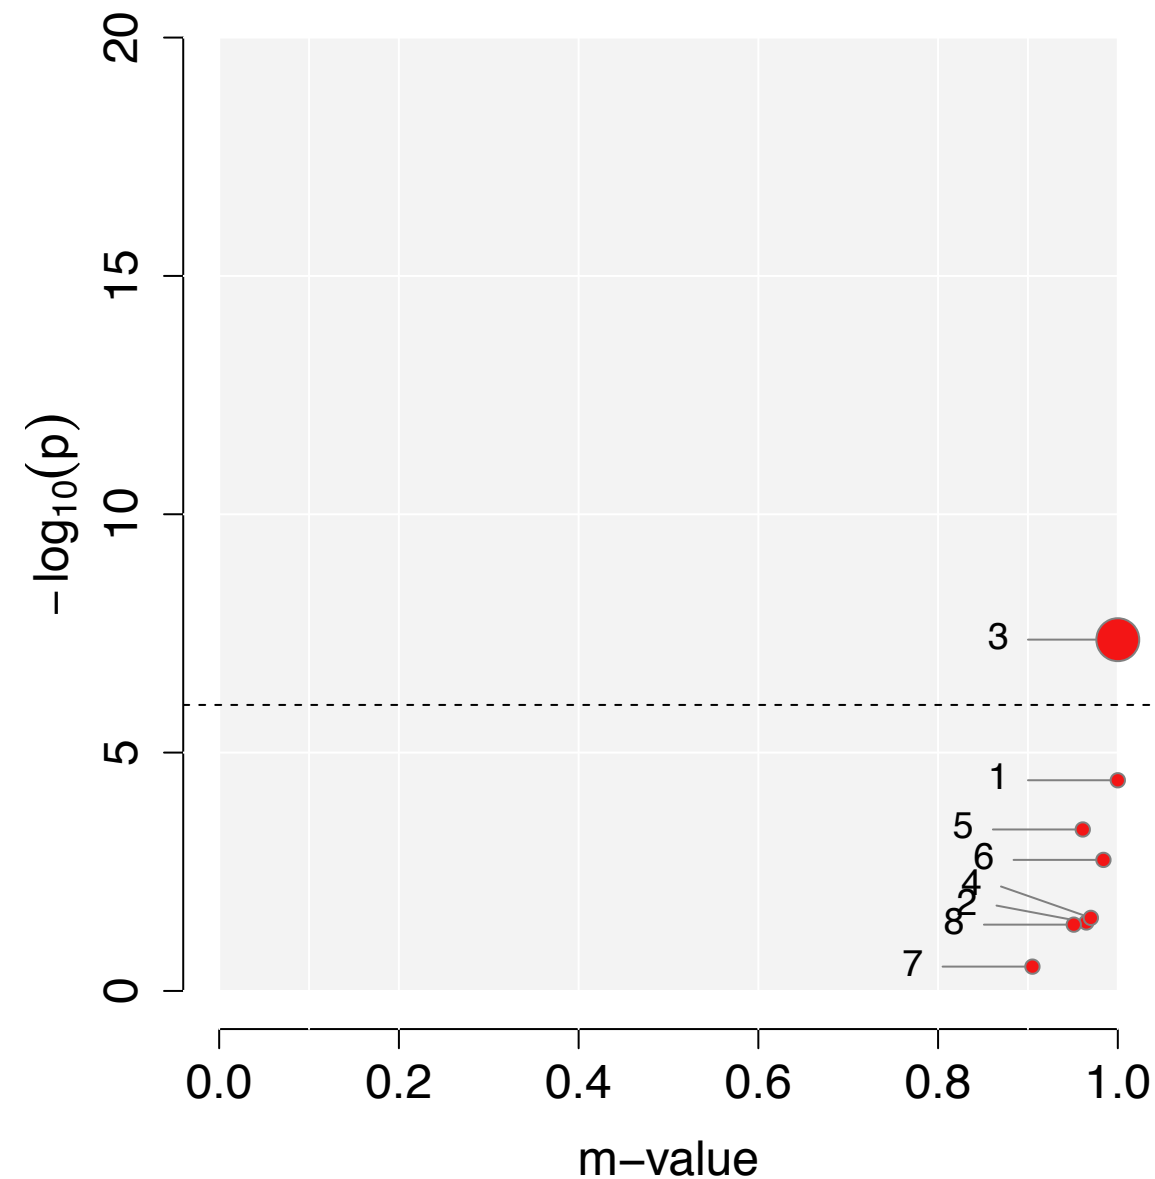

# rs9360557 (Meta $P = 3.04 \times 10^{-9}$ )

Gene : *RIMS1*

## GWAS P-value

- 6.60 x 10<sup>-8</sup> ● 1.SCZ
- 0.0053 ● 2.BIP
- 4.97 x 10<sup>-5</sup> ● 3.MD
- 0.0128 ● 4.ASD
- 0.0454 ● 5.ADHD
- 0.3447 ● 6.TS
- 0.0434 ● 7.ANO
- 0.2894 ● 8.OCD

FE summary

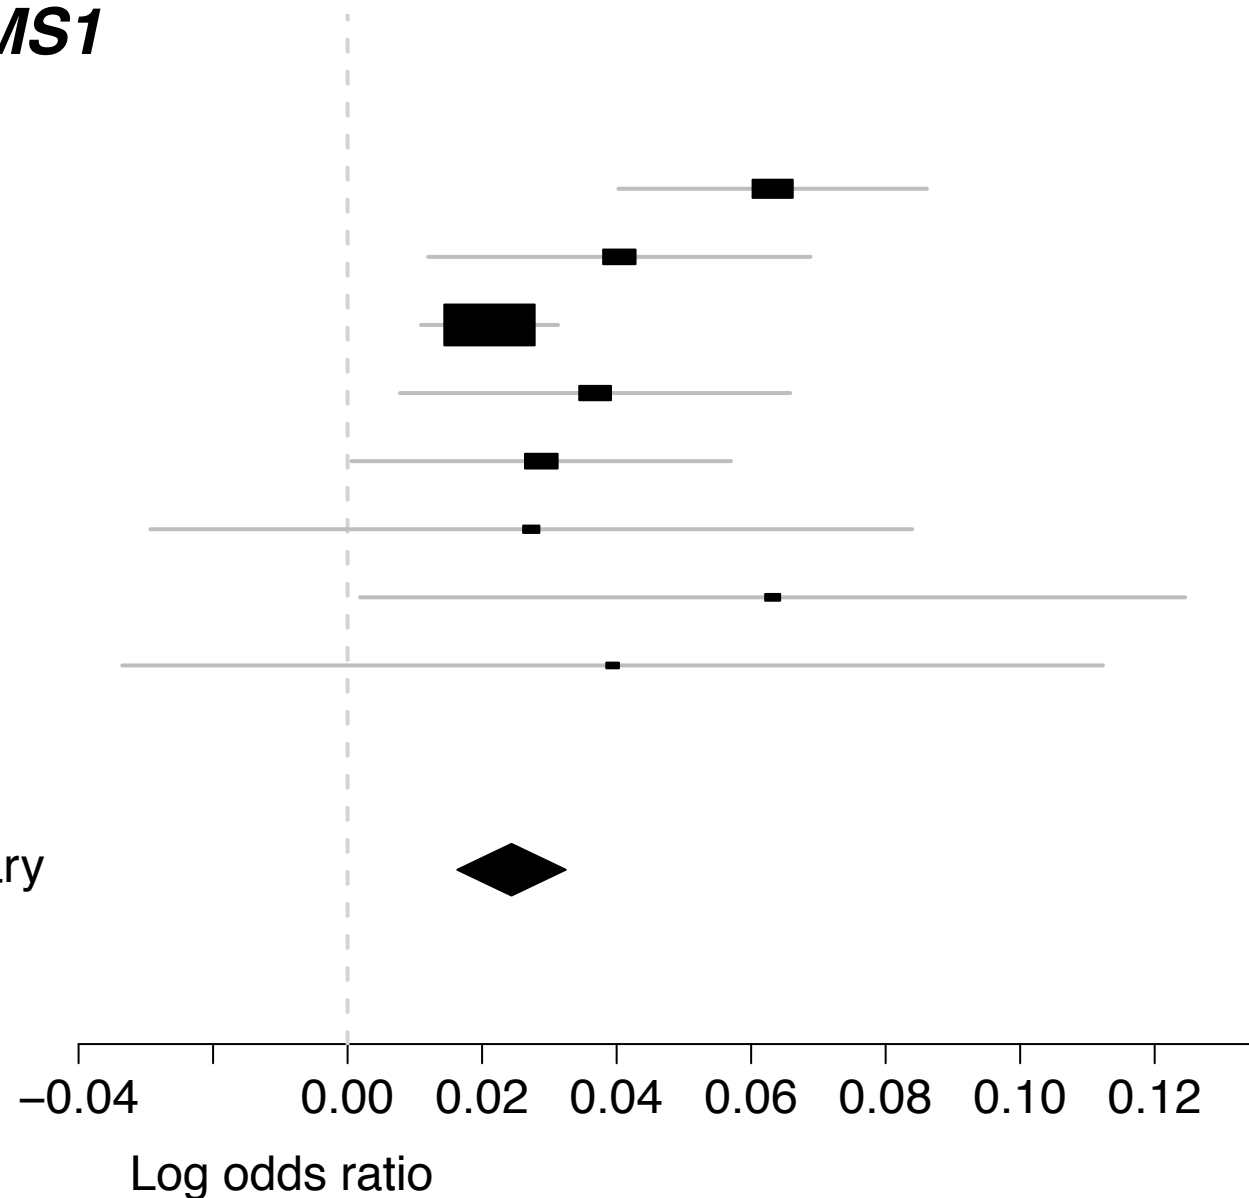

## PM-Plot

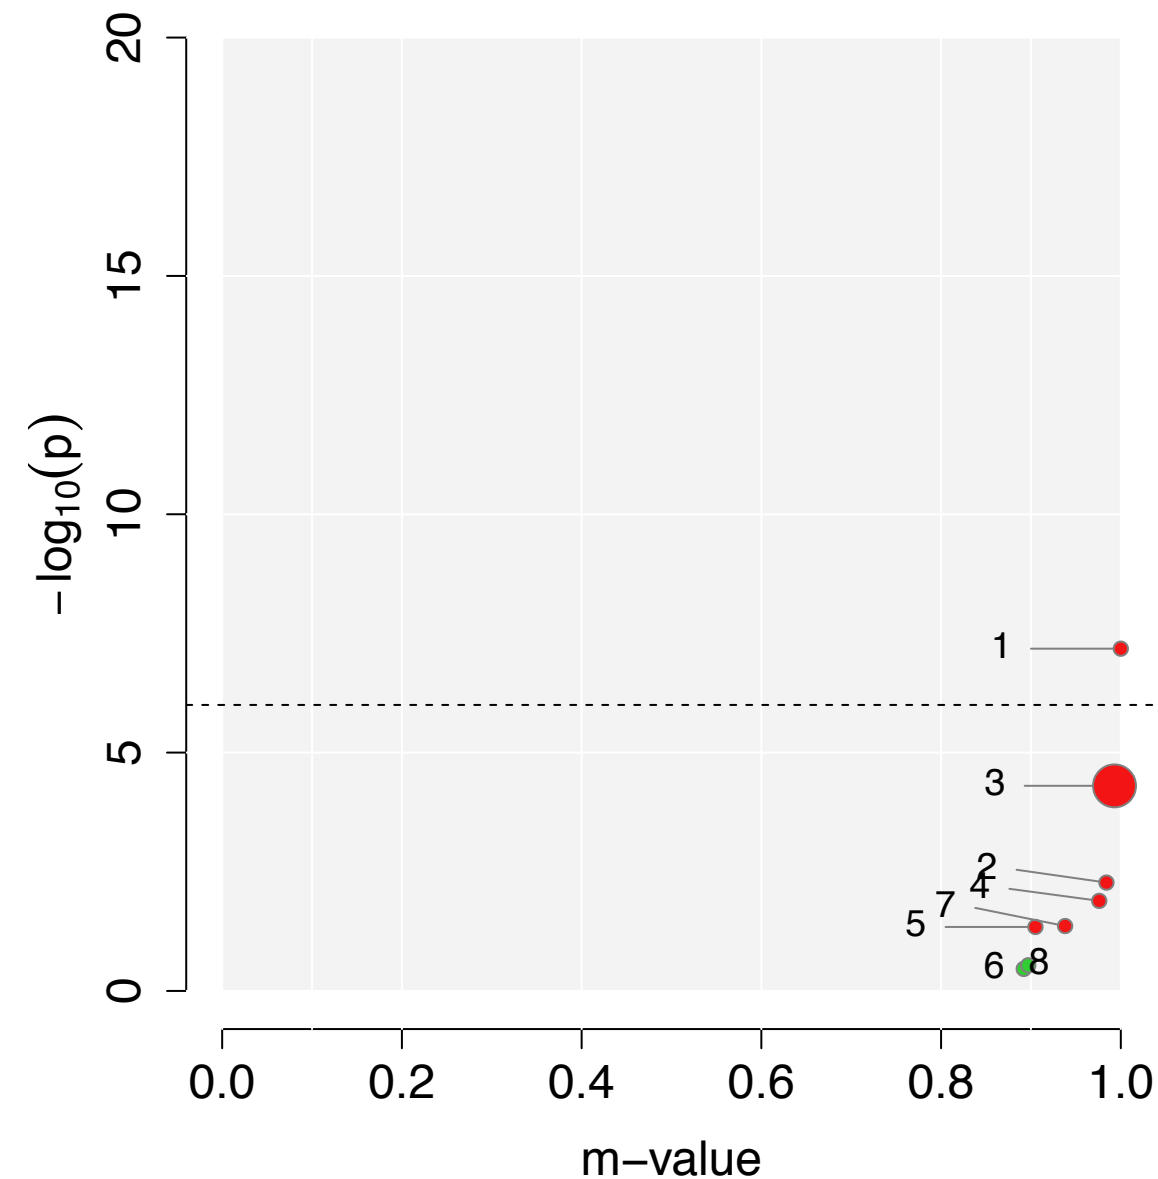

# rs9636107 (Meta $P = 3.03 \times 10^{-10}$ )

Gene : *TCF4*

## GWAS P-value

- 1.70 x 10<sup>-13</sup> ● 1.SCZ
- 0.1960 ● 2.BIP
- 0.0020 ● 3.MD
- 0.1739 ● 4.ASD
- 0.9055 ● 5.ADHD
- 0.4039 ● 6.TS
- 0.2016 ● 7.ANO
- 0.7071 ● 8.OCD

FE summary

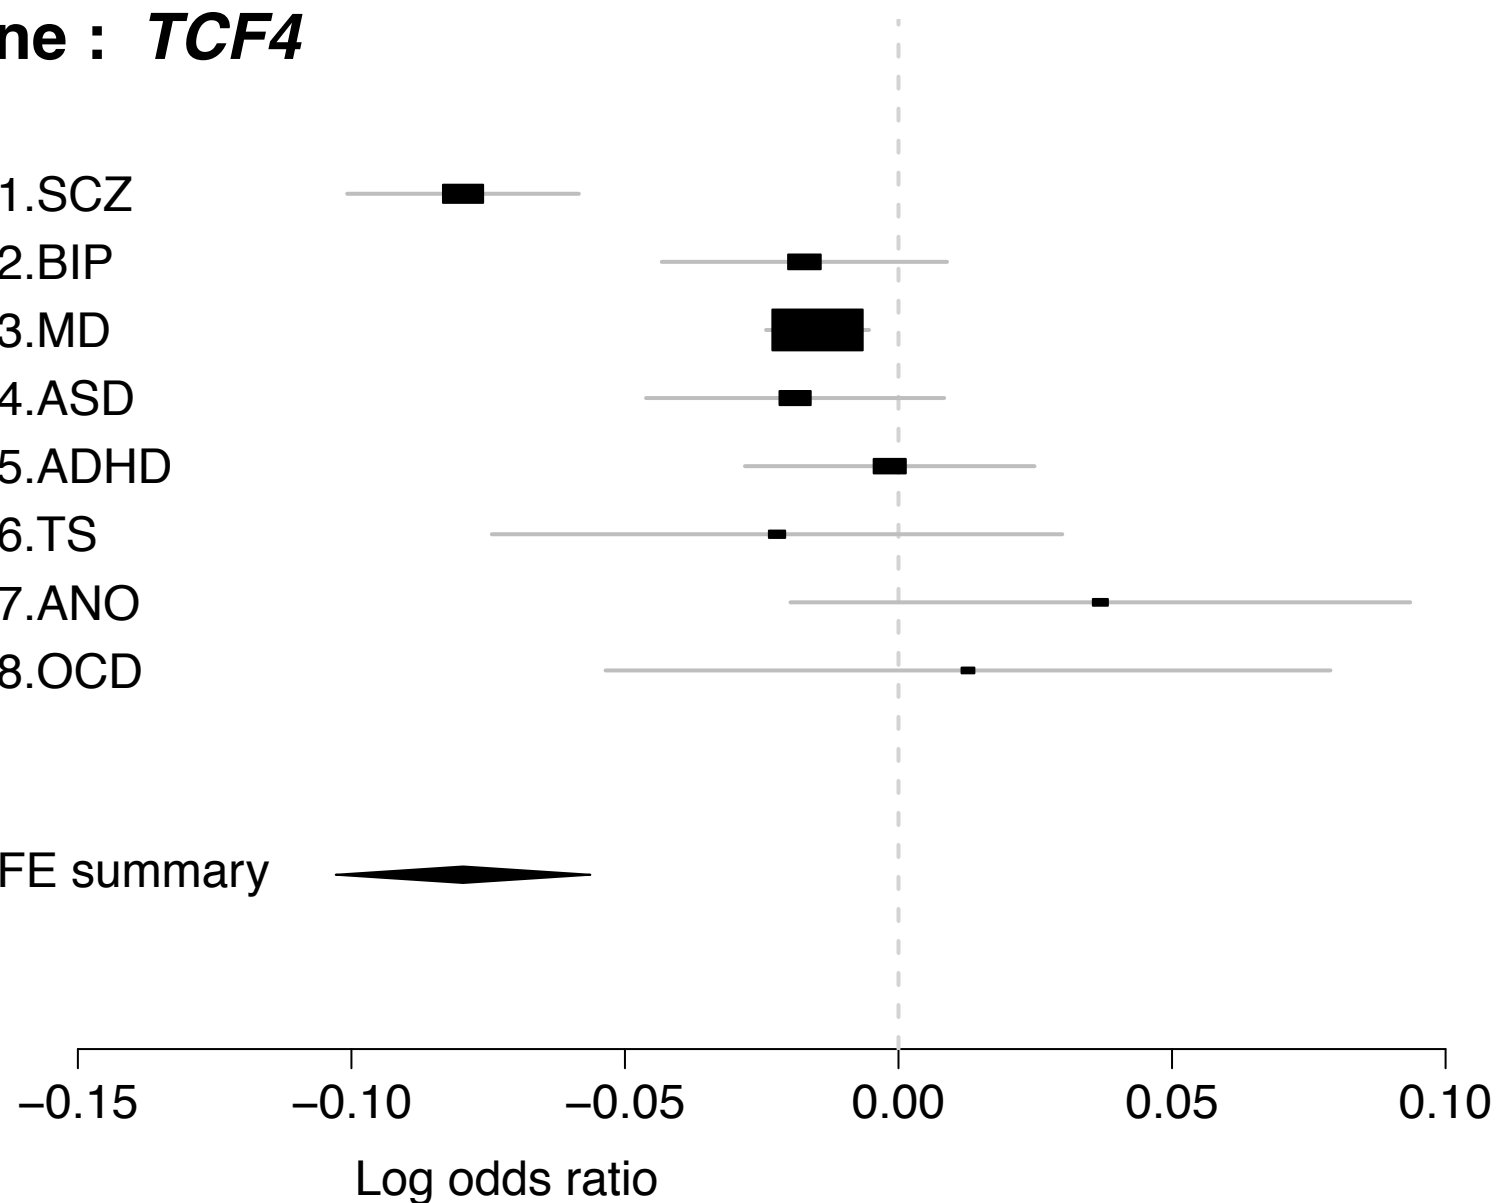

## PM-Plot

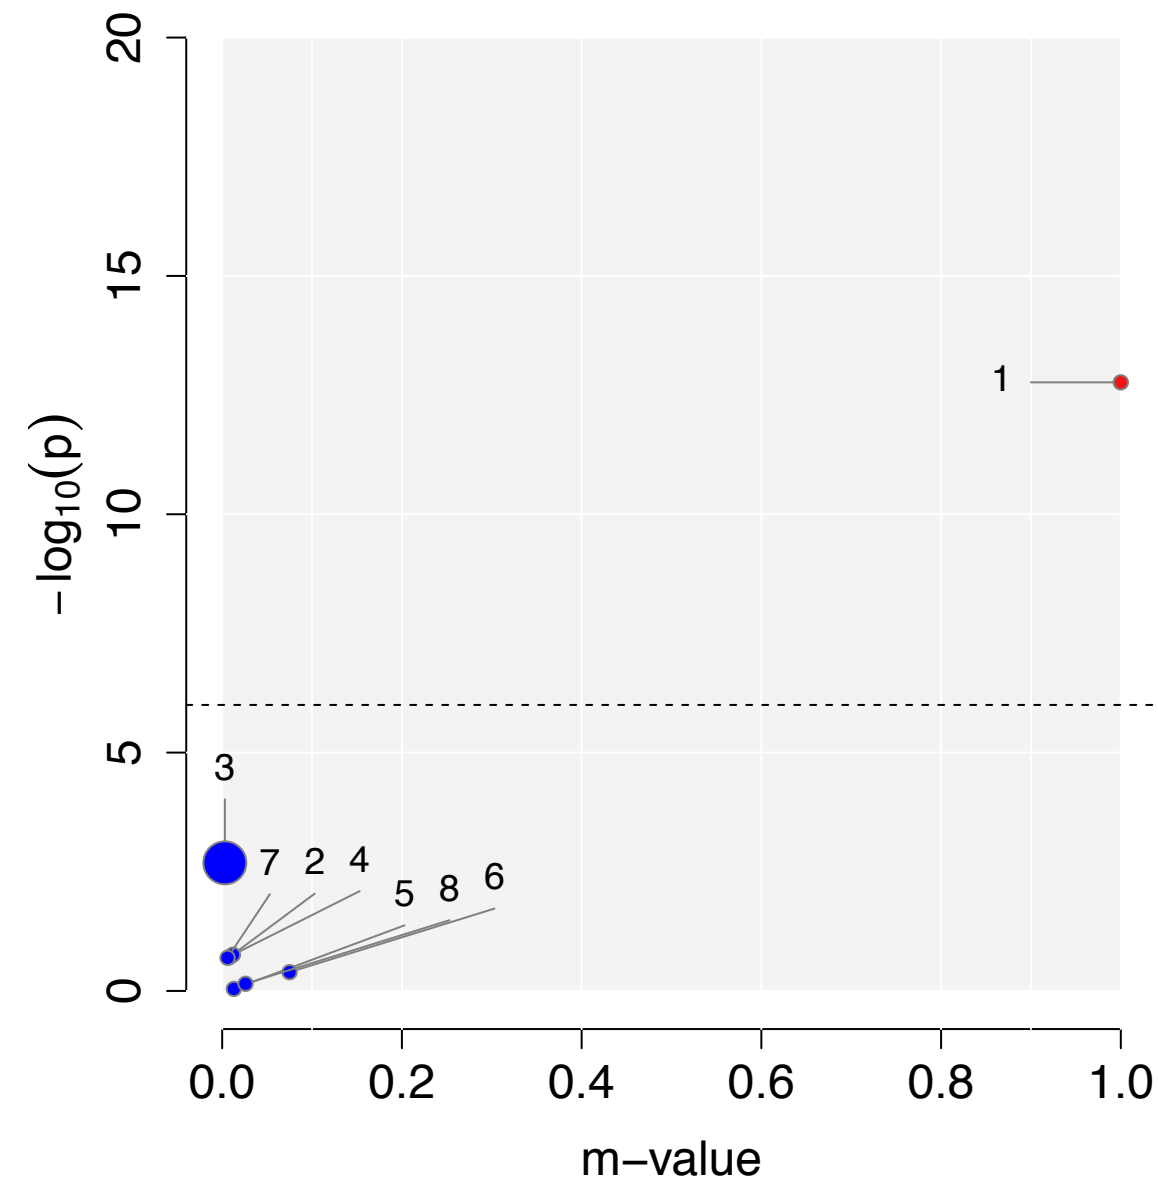

rs9677504 (Meta  $P = 7.26 \times 10^{-9}$ )

Gene : *SPAG16*, *VWC2L*

GWAS P-value

- 0.5524 ● 1.SCZ
- 0.1810 ● 2.BIP
- 0.0345 ● 3.MD
- 0.1150 ● 4.ASD
- $9.90 \times 10^{-8}$  ● 5.ADHD
- 0.0097 ● 6.TS
- 0.7504 ● 7.ANO
- 0.0013 ● 8.OCD

FE summary

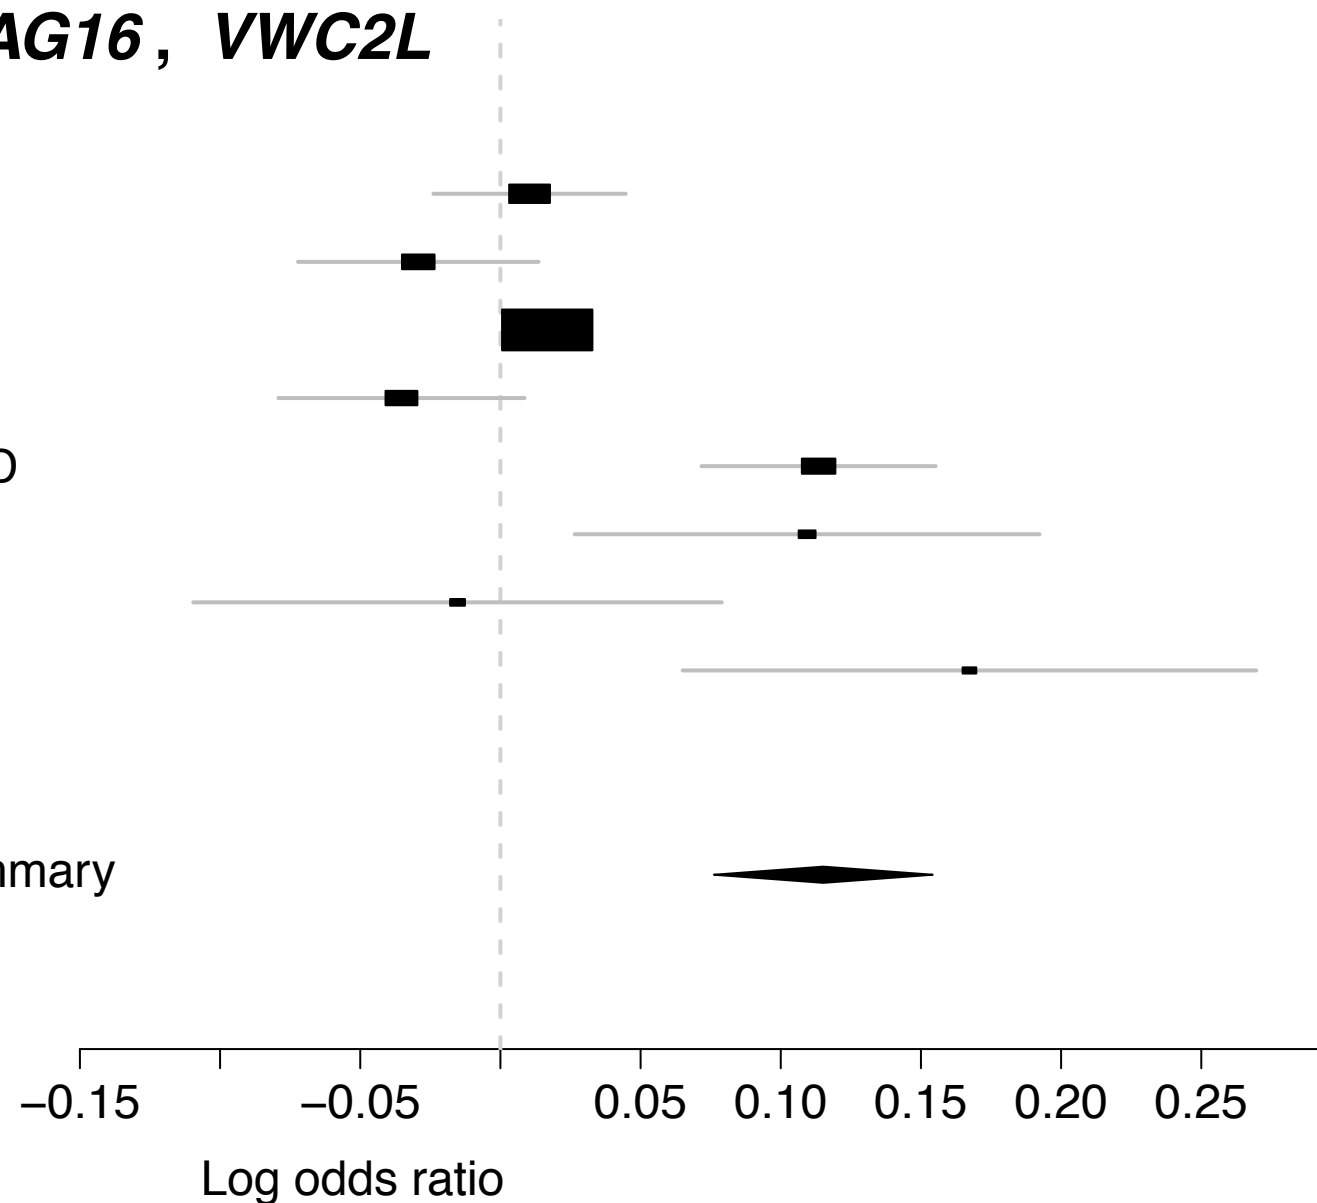

PM-Plot

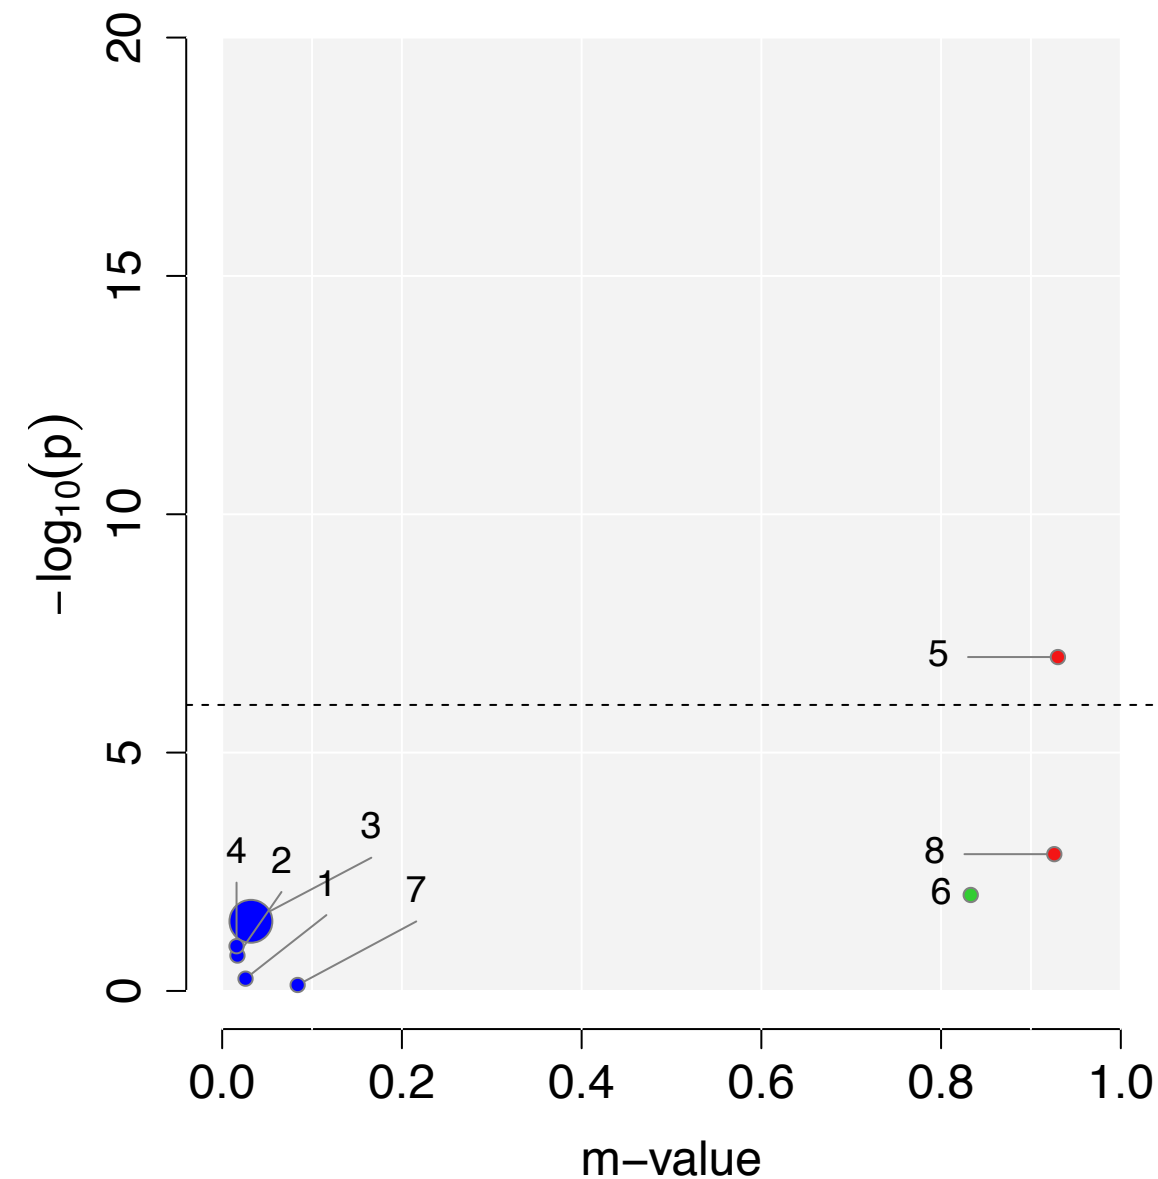

rs9787523 (Meta  $P = 3.57 \times 10^{-10}$ )

Gene : **SORCS3**

GWAS P-value

- 0.0001 ● 1.SCZ
- 0.2015 ● 2.BIP
- $1.94 \times 10^{-7}$  ● 3.MD
- 0.0160 ● 4.ASD
- 0.0006 ● 5.ADHD
- 0.0108 ● 6.TS
- 0.5407 ● 7.ANO
- 0.6047 ● 8.OCD

FE summary

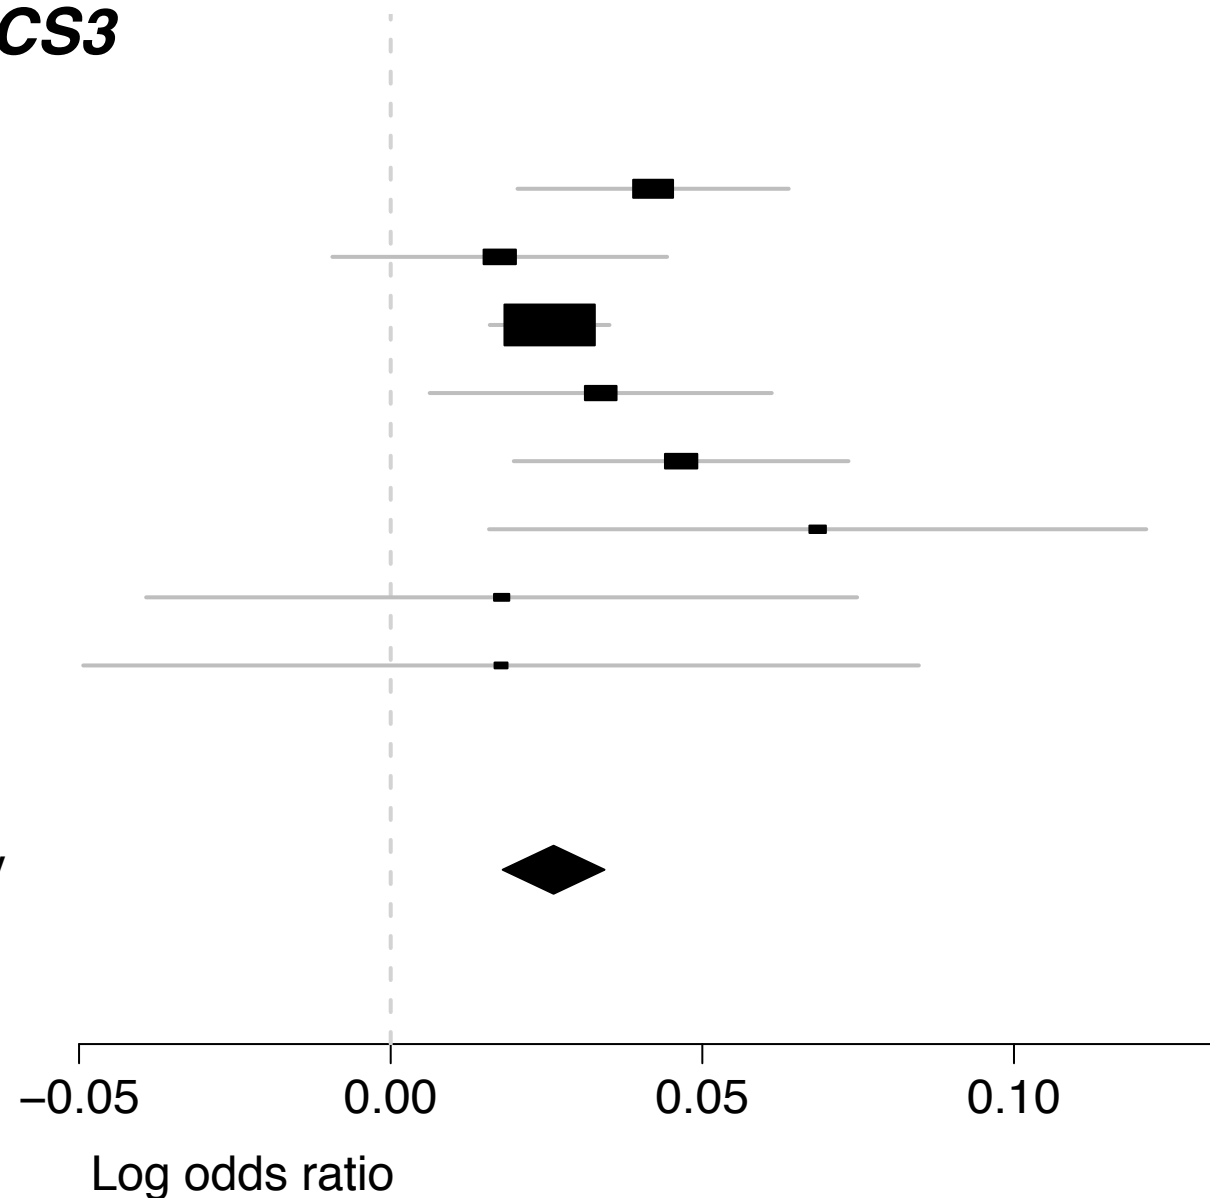

PM-Plot

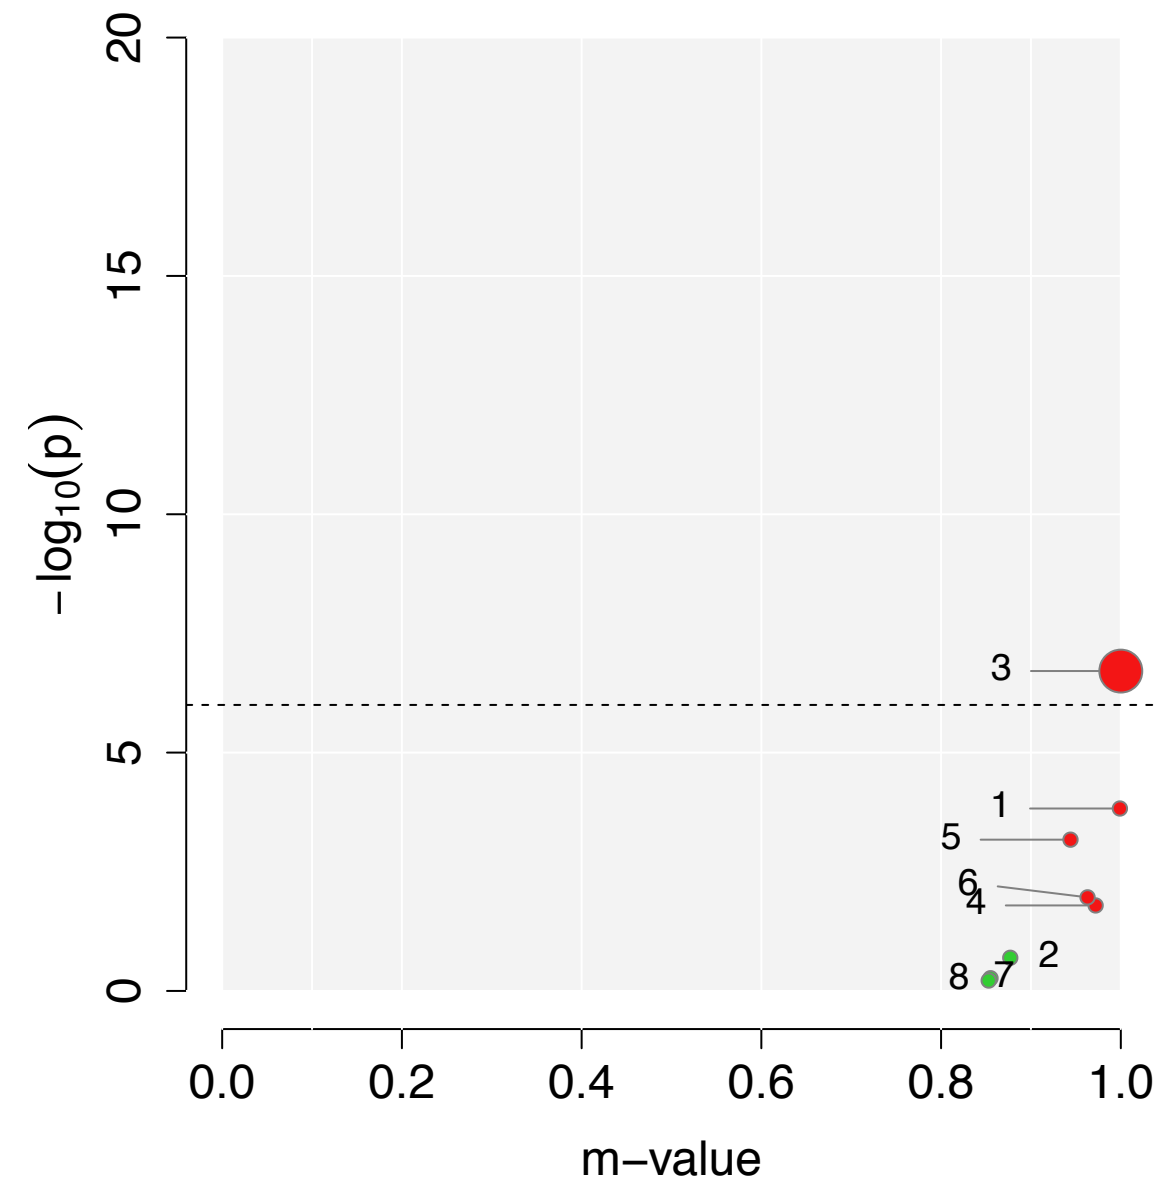

rs9834970 (Meta  $P = 1.83 \times 10^{-17}$ )

Gene : *TRANK1* , *DCLK3*

GWAS P-value

- 5.53 x 10<sup>-10</sup> ● 1.SCZ
- 4.78 x 10<sup>-4</sup> ● 2.BIP
- 0.2076 ● 3.MD
- 0.3574 ● 4.ASD
- 0.0990 ● 5.ADHD
- 0.1644 ● 6.TS
- 0.8789 ● 7.ANO
- 0.0060 ● 8.OCD

FE summary

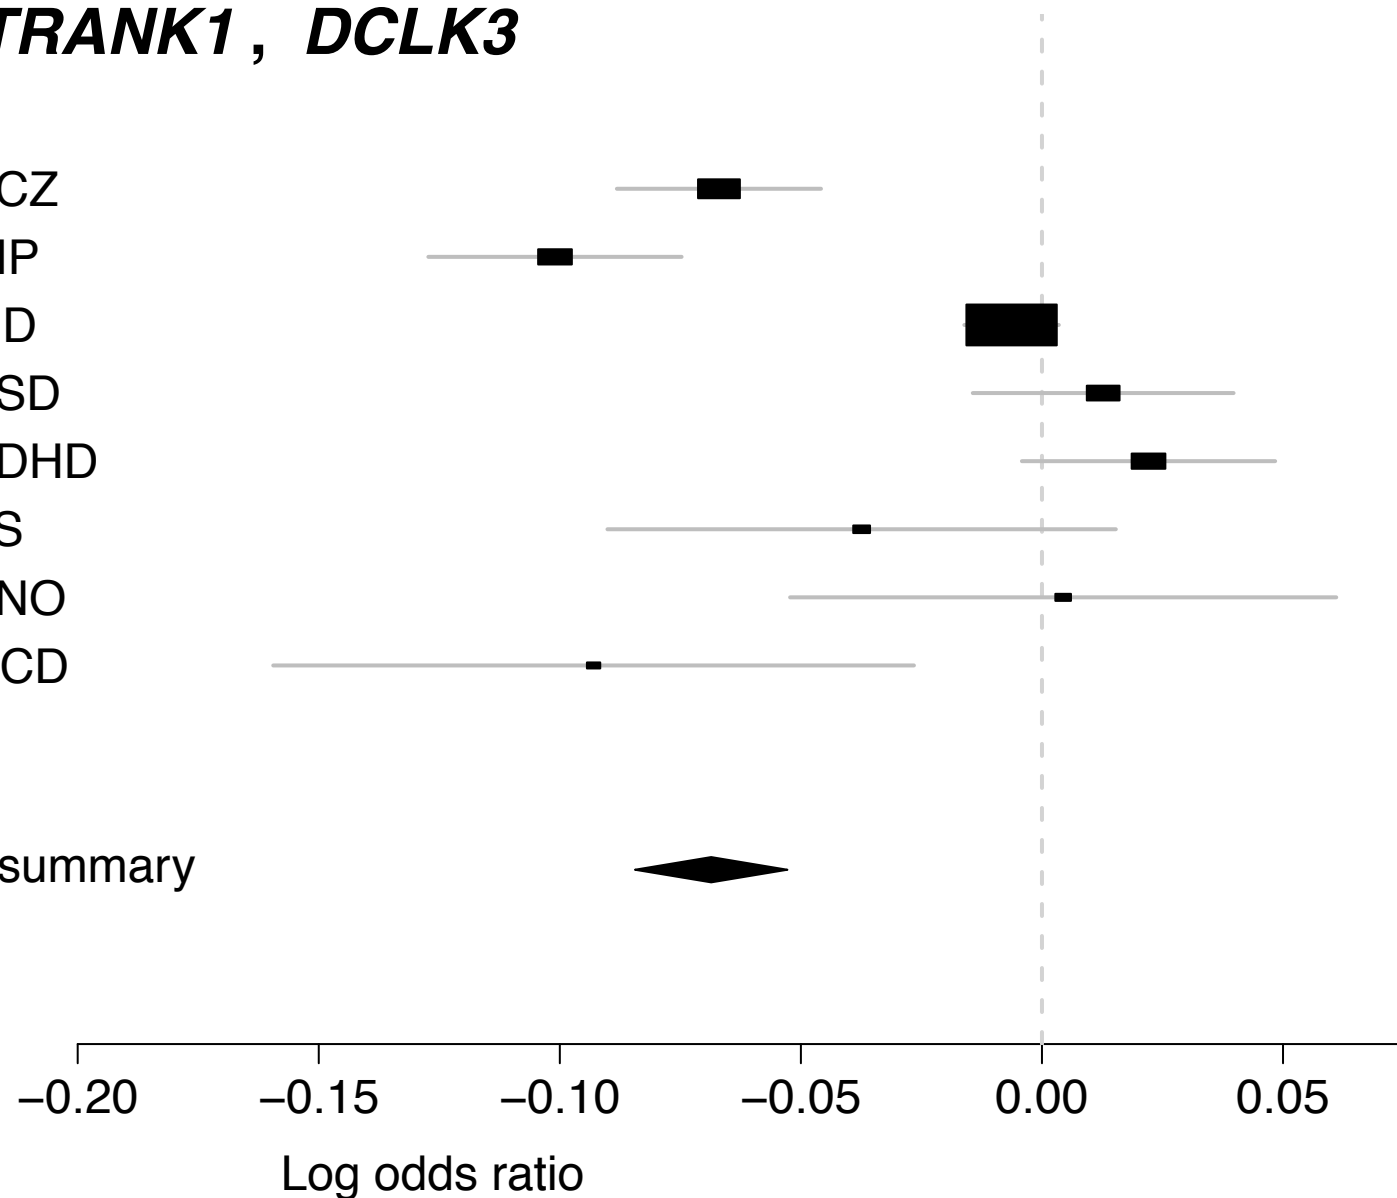

PM-Plot

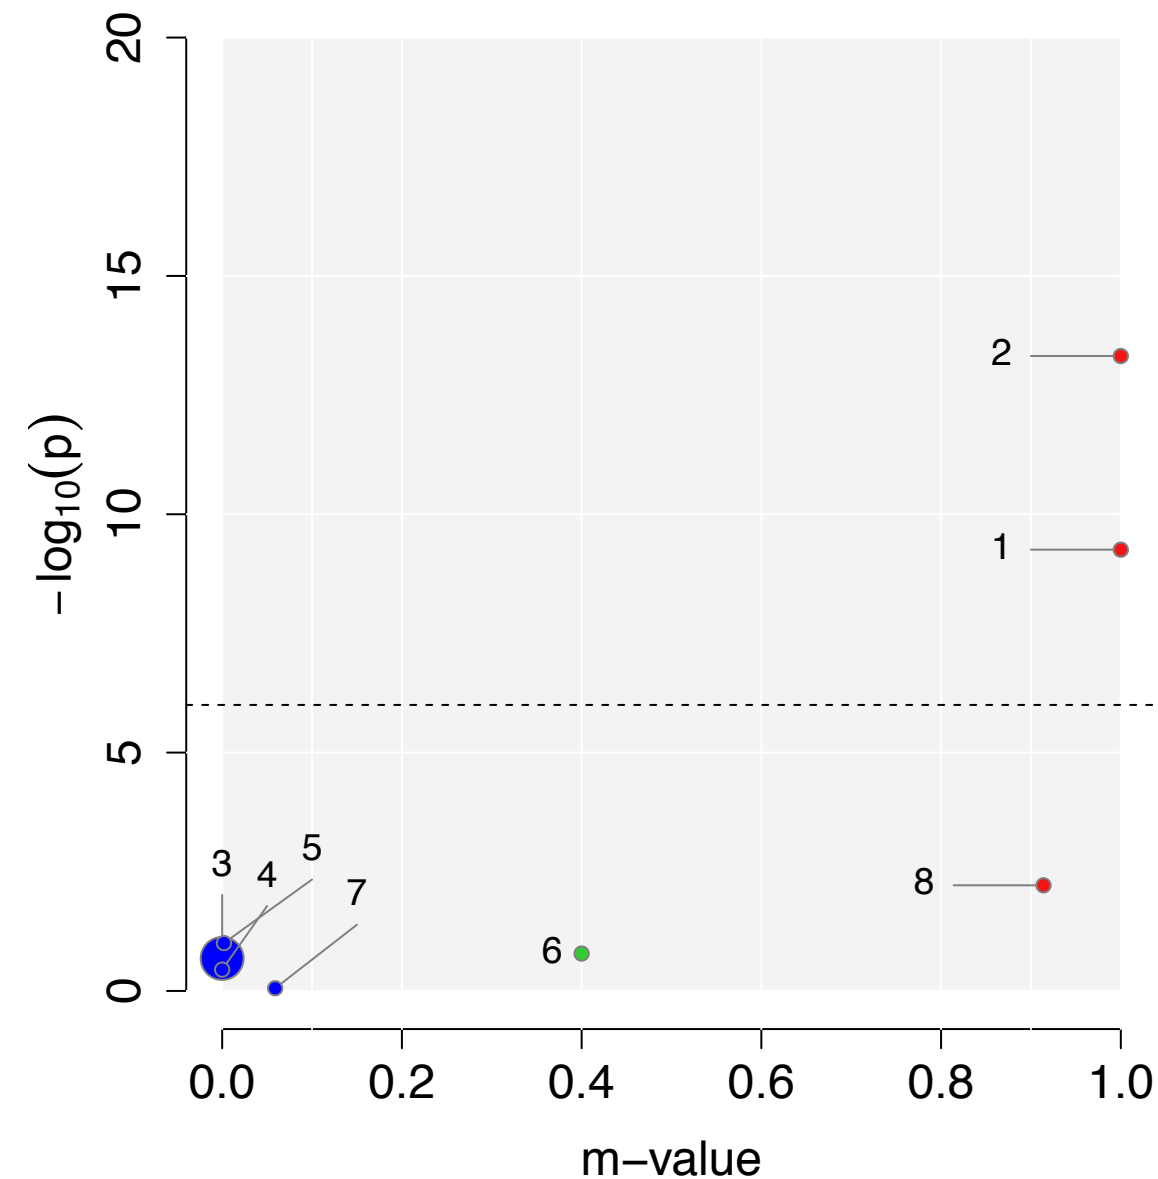

# rs9922678 (Meta $P = 2.52 \times 10^{-10}$ )

Gene : *GRIN2A*

## GWAS P-value

- 6.77 x 10<sup>-9</sup> ● 1.SCZ
- 1.28 x 10<sup>-6</sup> ● 2.BIP
- 0.2735 ● 3.MD
- 0.0844 ● 4.ASD
- 0.1867 ● 5.ADHD
- 0.8658 ● 6.TS
- 0.1287 ● 7.ANO
- 0.2626 ● 8.OCD

FE summary

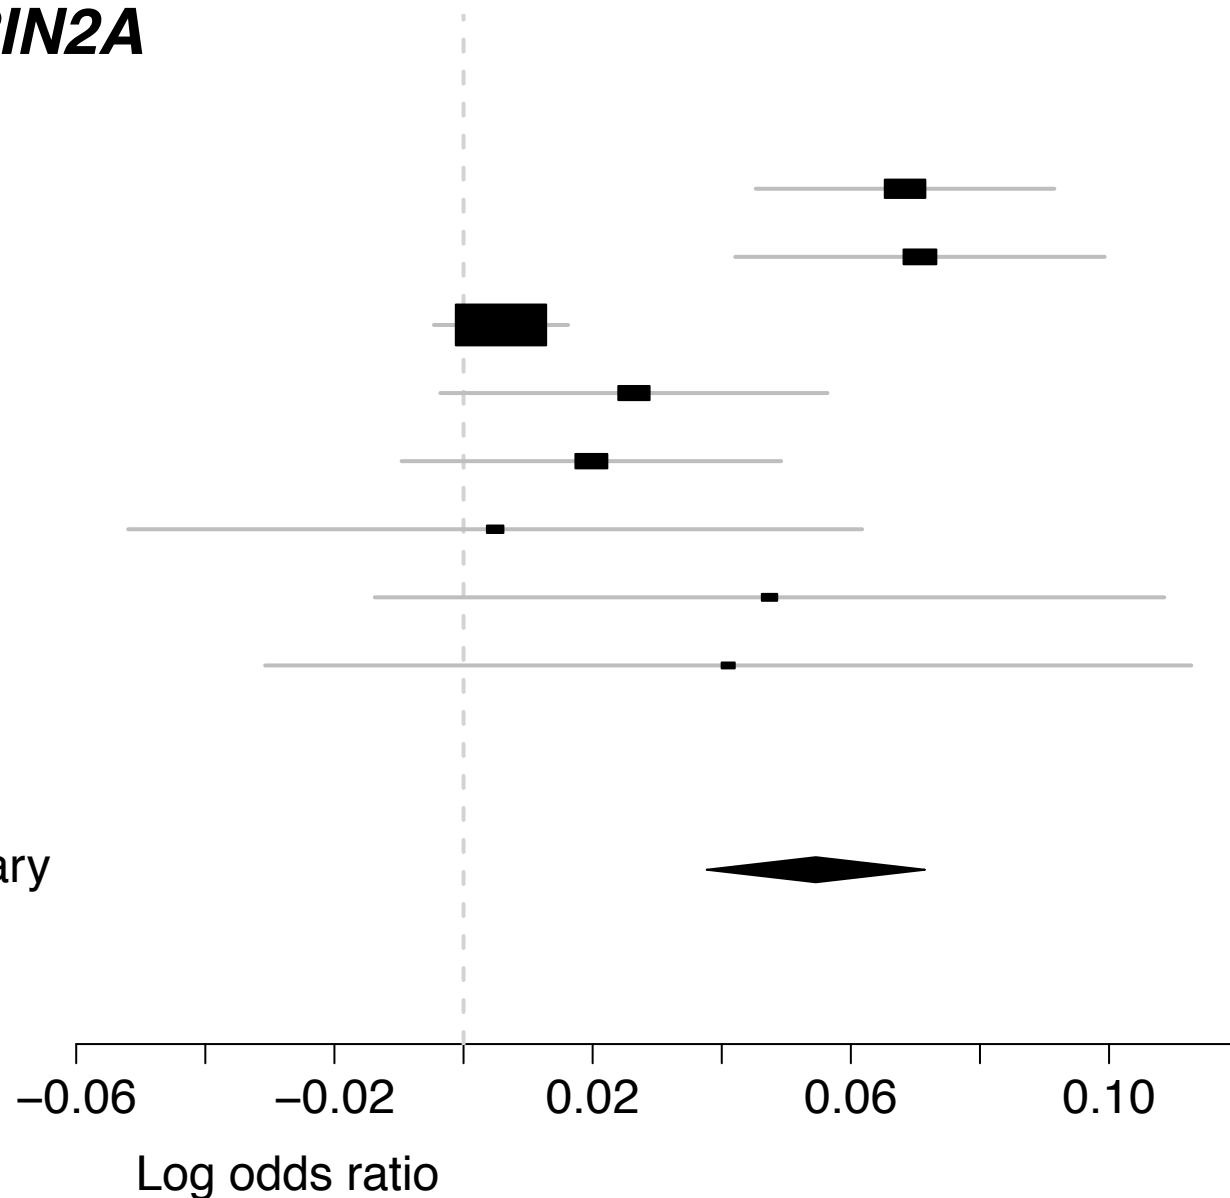

## PM-Plot

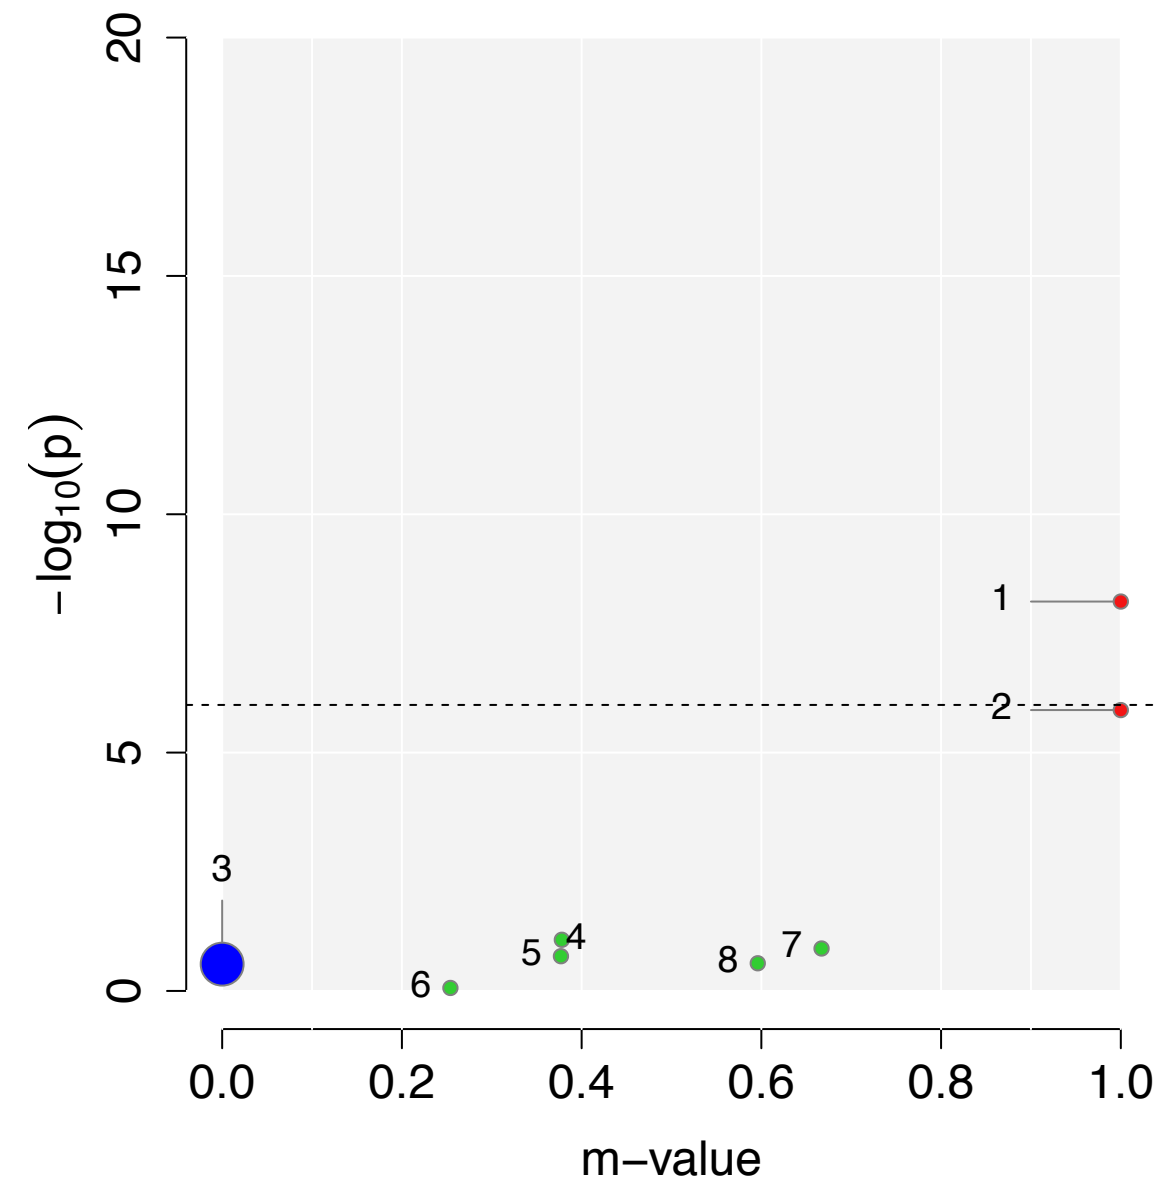



# rs10043984 (Meta $P = 1.9e \times 10^{-9}$ )

Gene : *KDM3B*, *FAM53C*

## GWAS P-value

- 1.30 x 10<sup>-7</sup> ● 1.SCZ
- 3.33 x 10<sup>-6</sup> ● 2.BIP
- 0.0810 ● 3.MD
- 0.0415 ● 4.ASD
- 0.1649 ● 5.ADHD
- 0.0686 ● 6.TS
- 0.3263 ● 7.ANO
- 0.0160 ● 8.OCD

FE summary

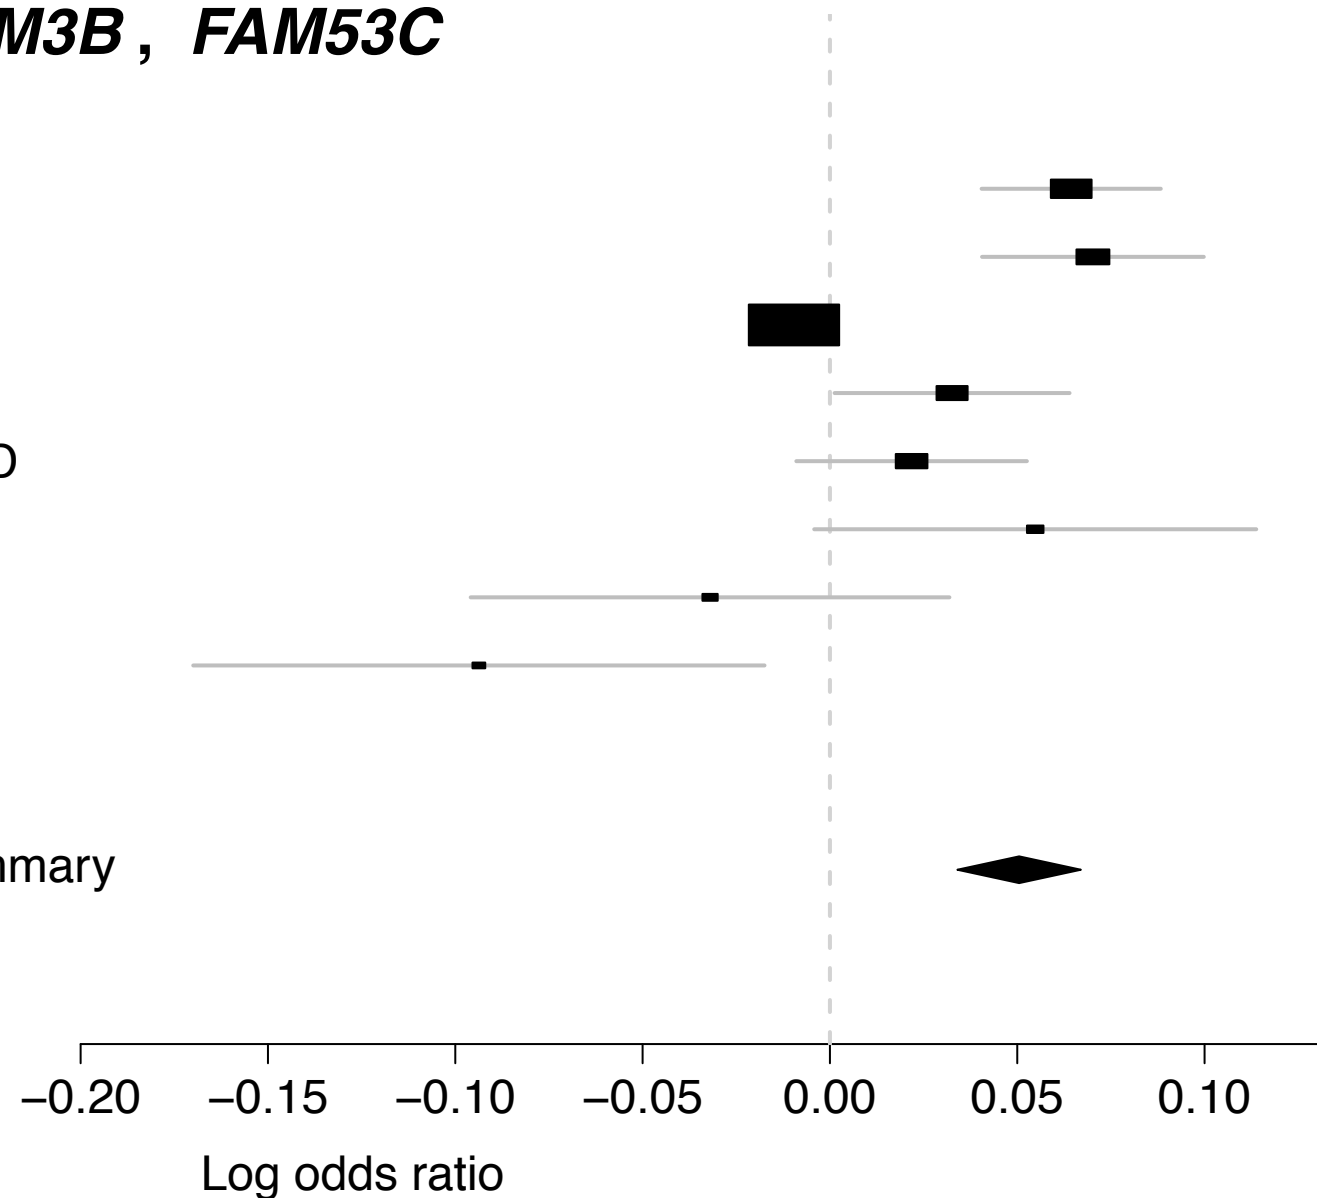

## PM-Plot

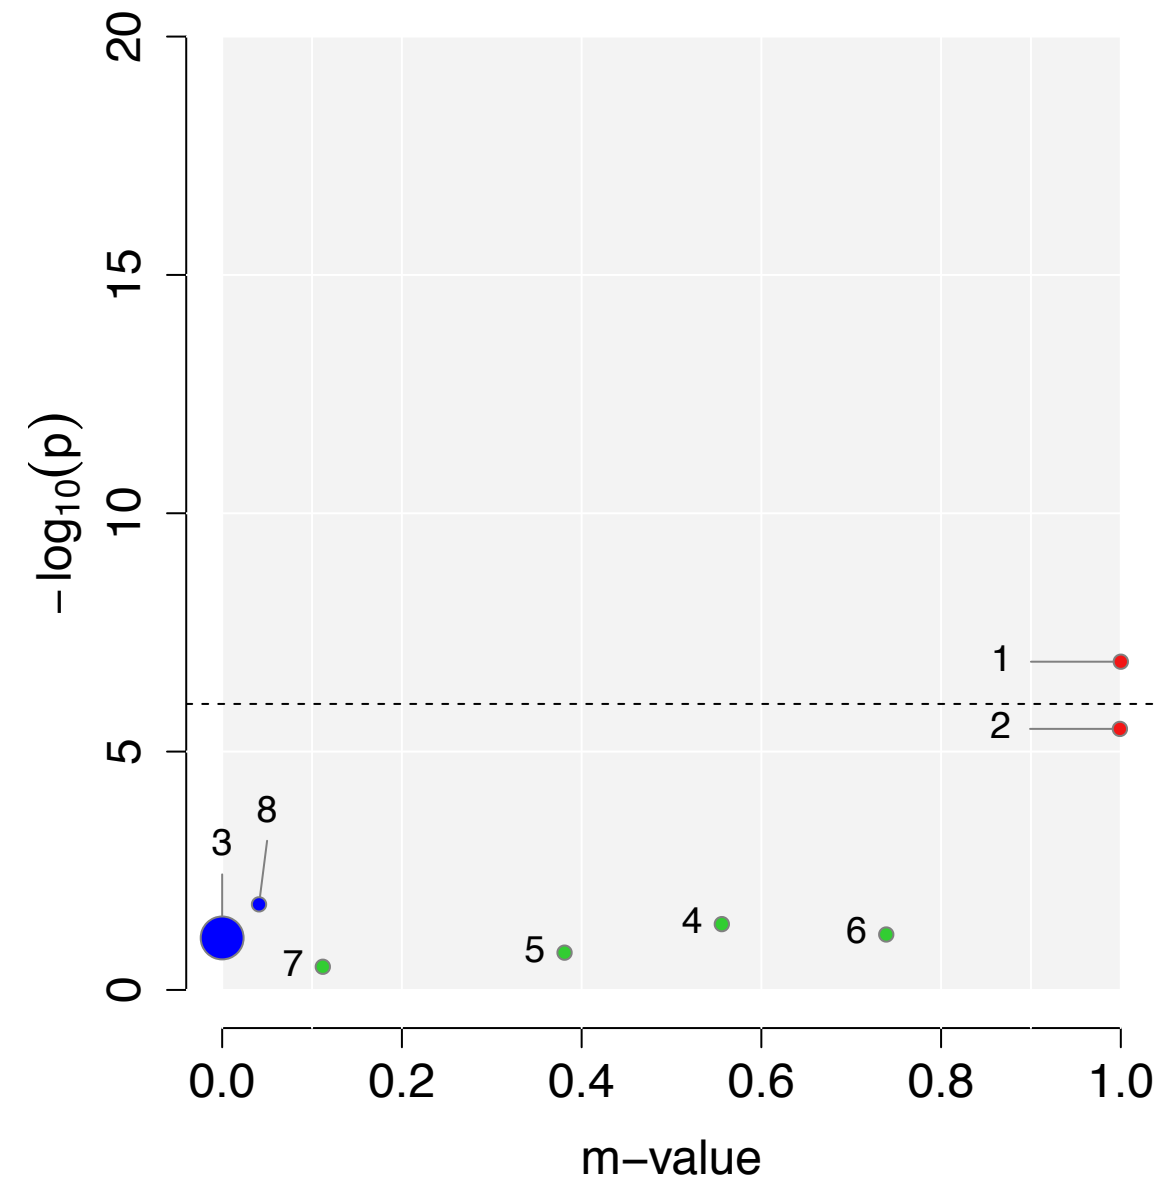

# rs10108980 (Meta $P = 4.15 \times 10^{-10}$ )

Gene : *CSMD1*

## GWAS P-value

- 3.56 x 10<sup>-8</sup> ● 1.SCZ
- 0.8808 ● 2.BIP
- 0.4735 ● 3.MD
- 0.8105 ● 4.ASD
- 0.7088 ● 5.ADHD
- 0.0003 ● 6.TS
- 0.0009 ● 7.ANO
- 0.3406 ● 8.OCD

FE summary

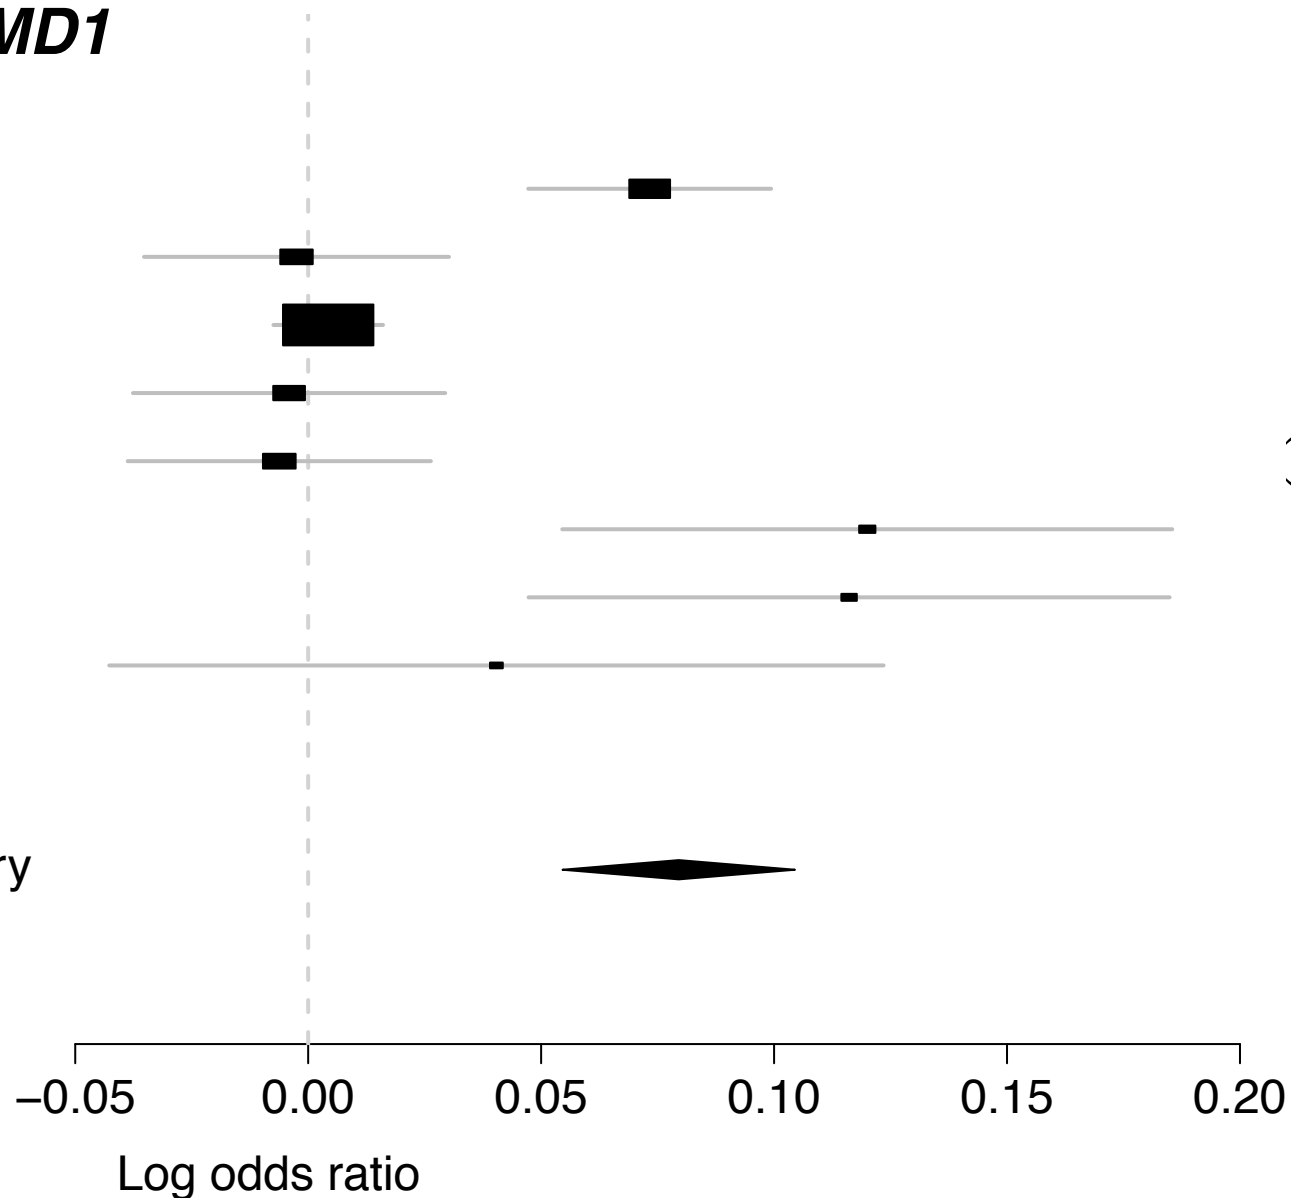

## PM-Plot

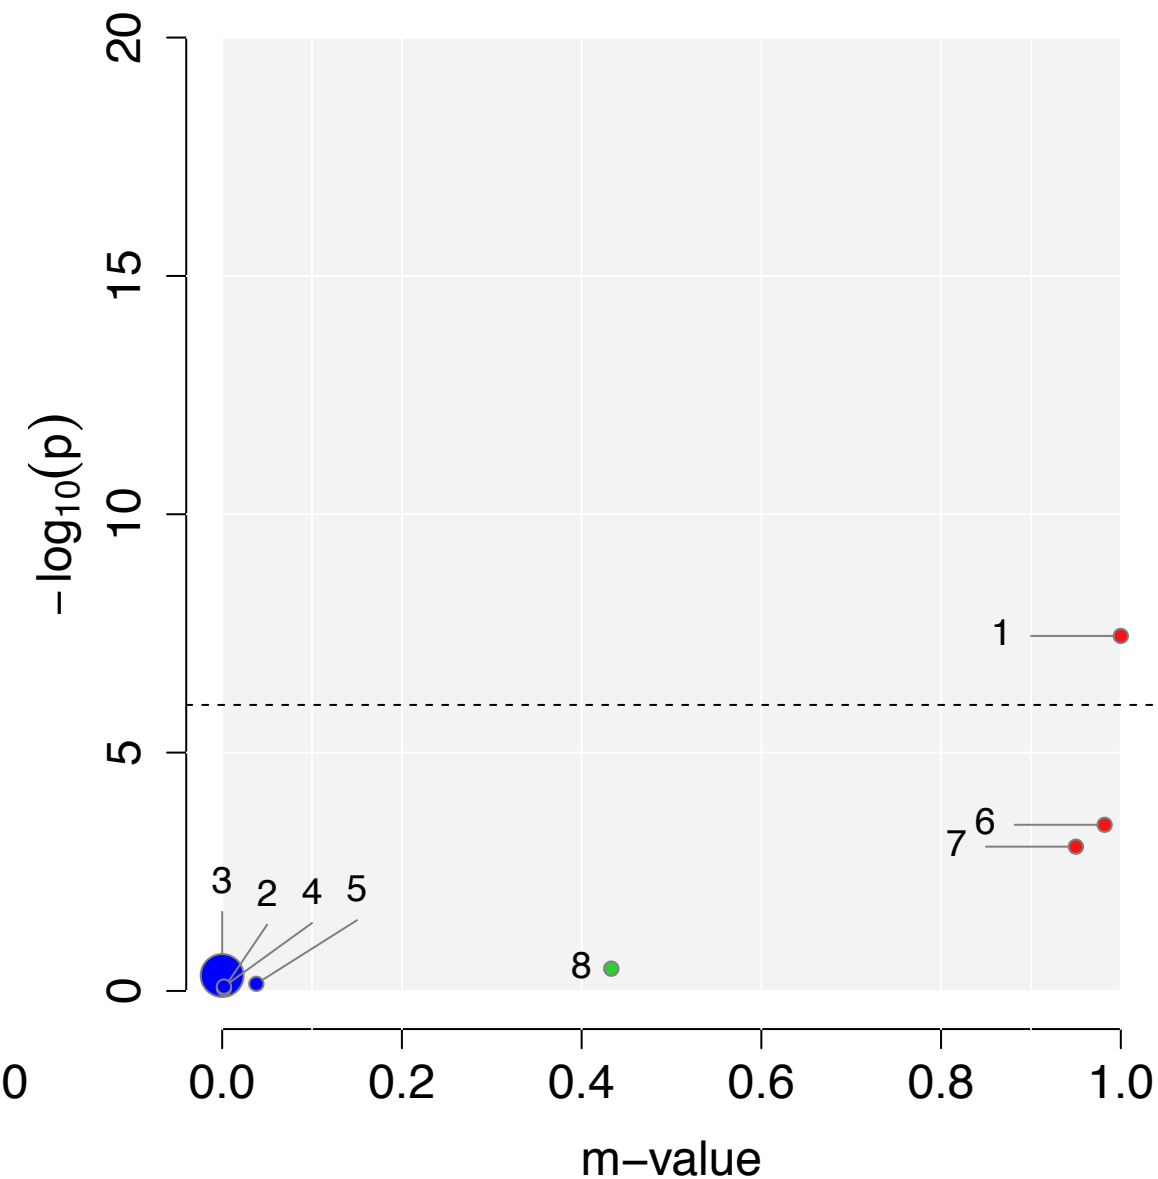

rs10149470 (Meta  $P = 4.8e \times 10^{-13}$ )

Gene : *BAG5*, *APOPT1*

GWAS P-value

- 0.0008 ● 1.SCZ
- 0.0105 ● 2.BIP
- $3.26 \times 10^{-9}$  ● 3.MD
- $8.75 \times 10^{-5}$  ● 4.ASD
- 0.2713 ● 5.ADHD
- 0.0083 ● 6.TS
- 0.6941 ● 7.ANO
- 0.4682 ● 8.OCD

FE summary

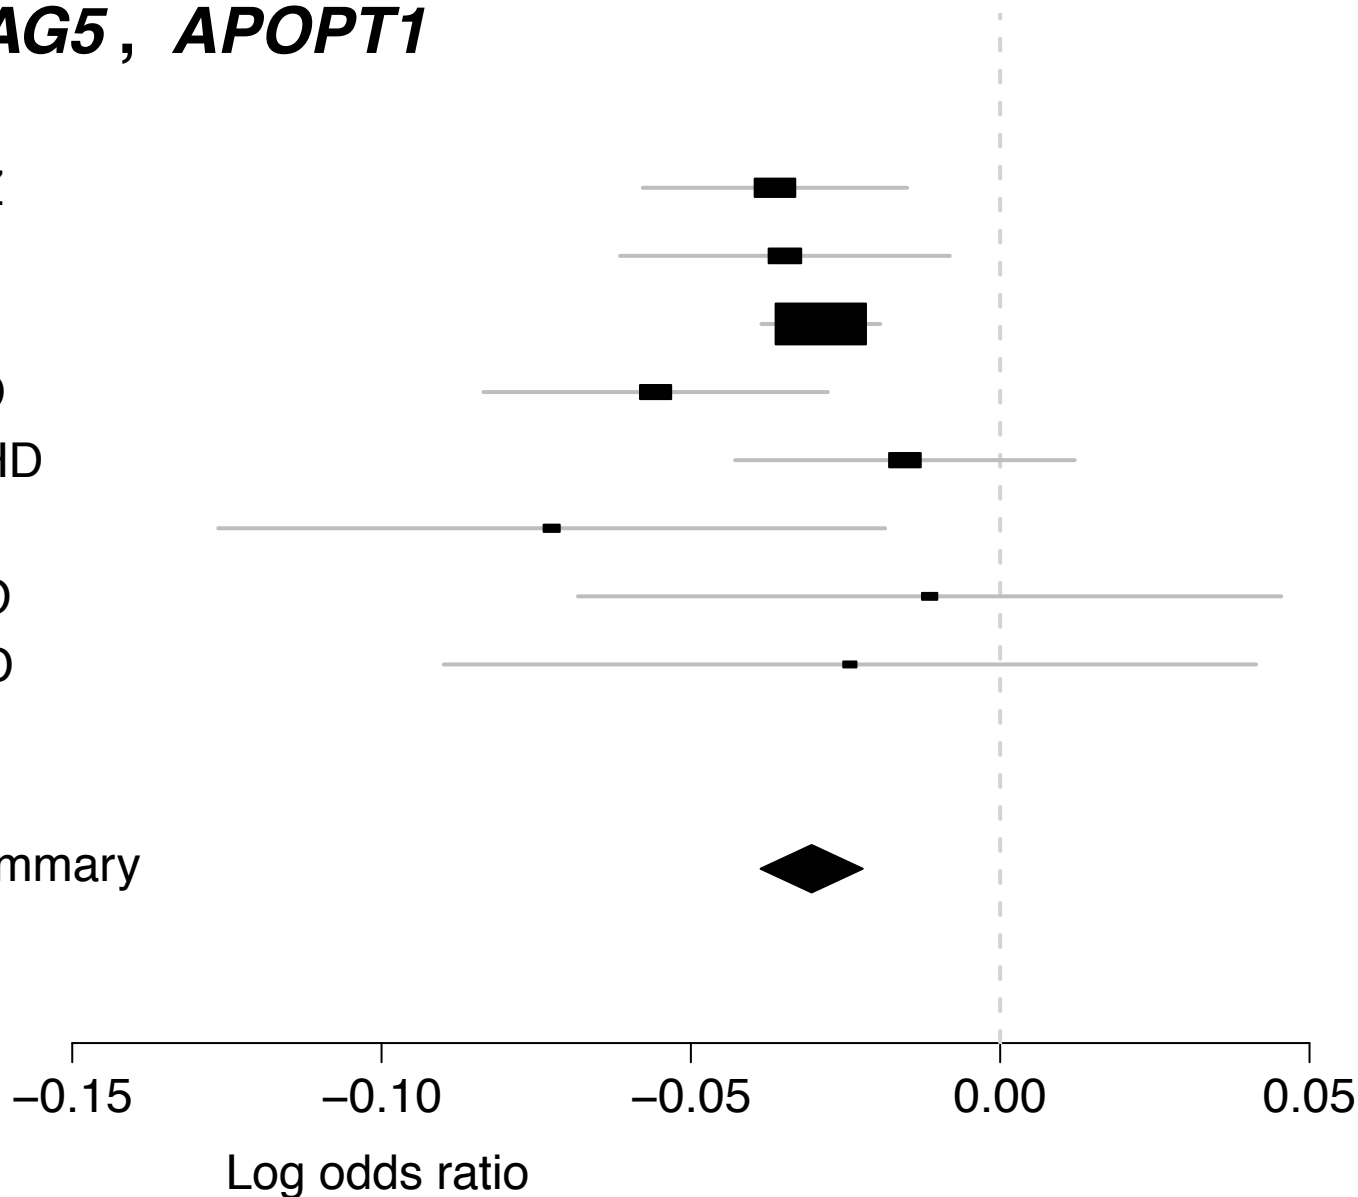

PM-Plot

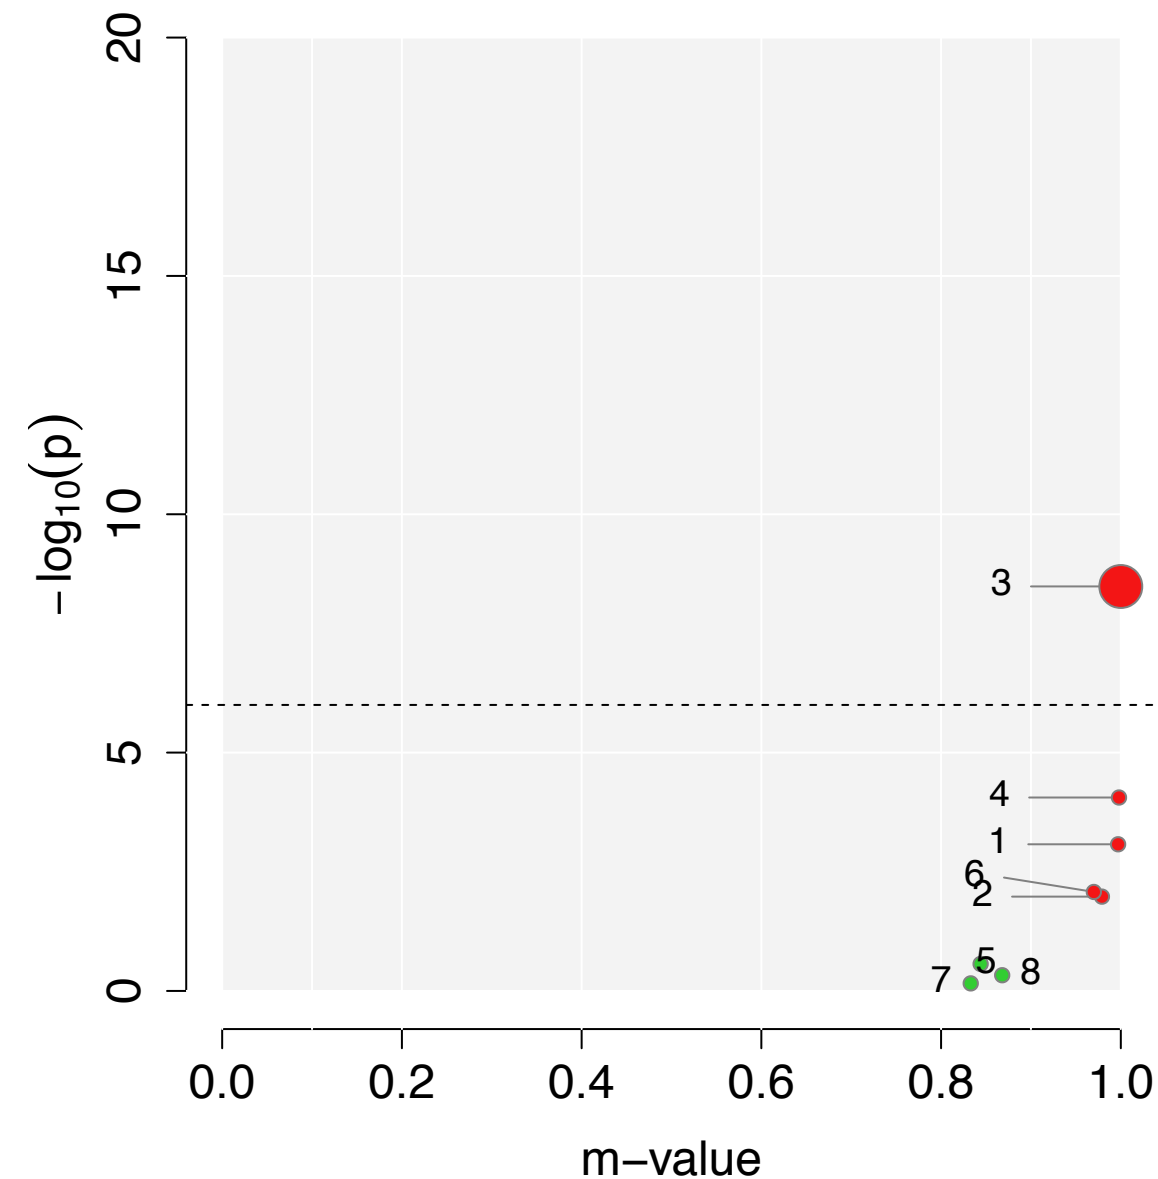

# rs10211550 (Meta $P = 1.37 \times 10^{-8}$ )

Gene : *HSPE1-MOB4, MOB4*

## GWAS P-value

- 4.84 x 10<sup>-9</sup> ● 1.SCZ
- 0.3238 ● 2.BIP
- 0.0030 ● 3.MD
- 0.5974 ● 4.ASD
- 0.1531 ● 5.ADHD
- 0.0624 ● 6.TS
- 0.0152 ● 7.ANO
- 0.0719 ● 8.OCD

FE summary

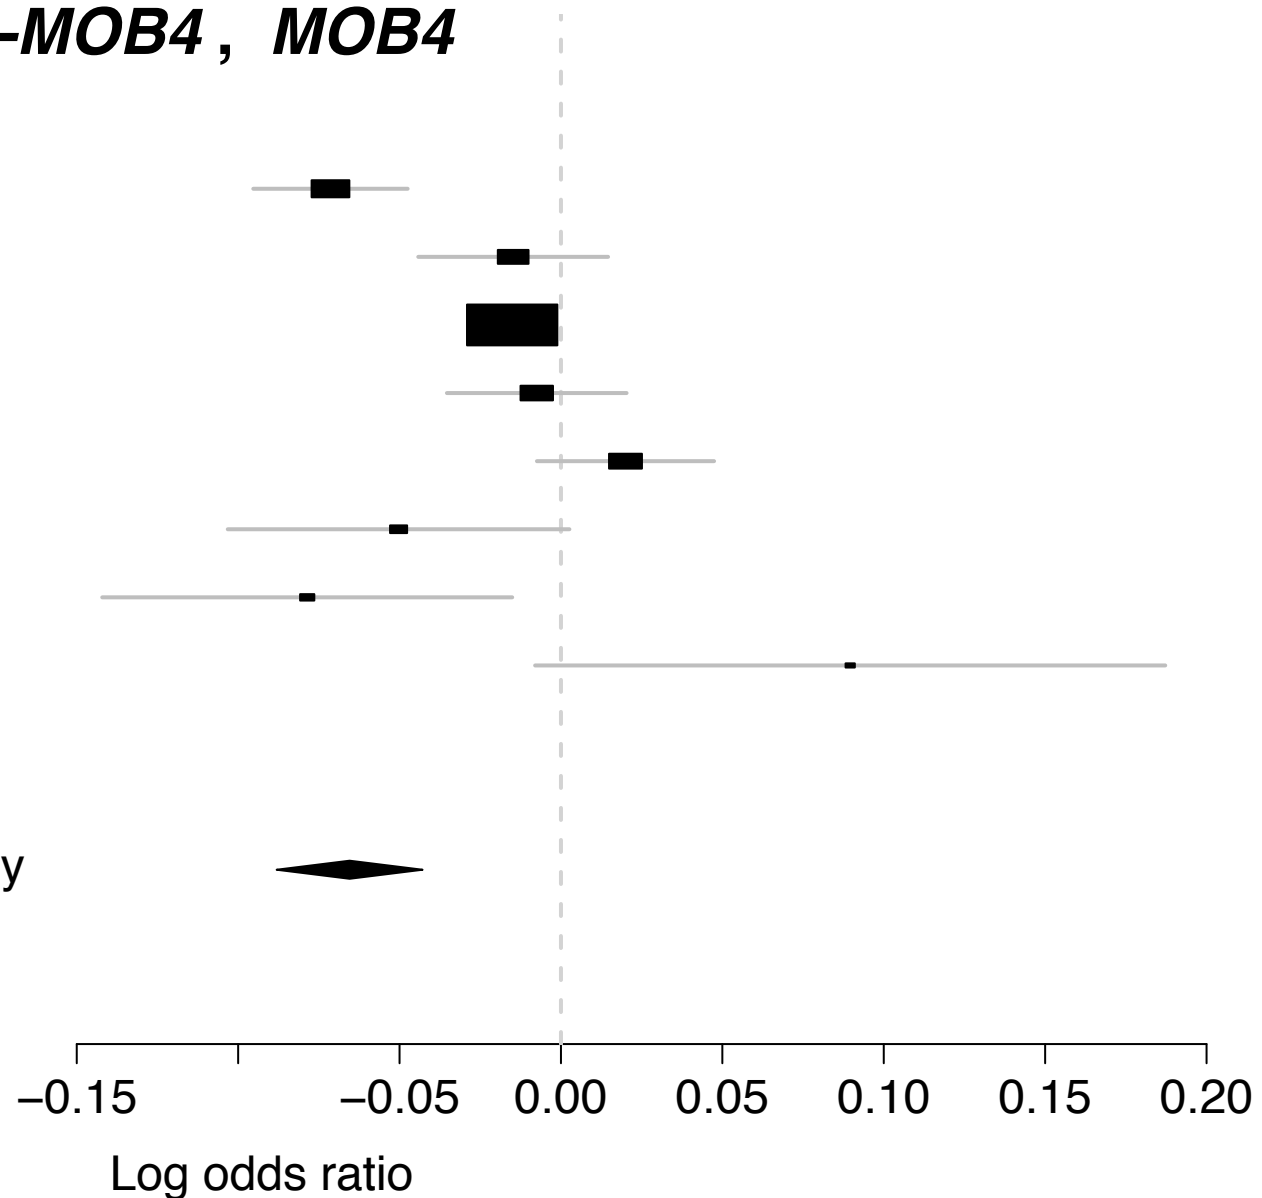

## PM-Plot

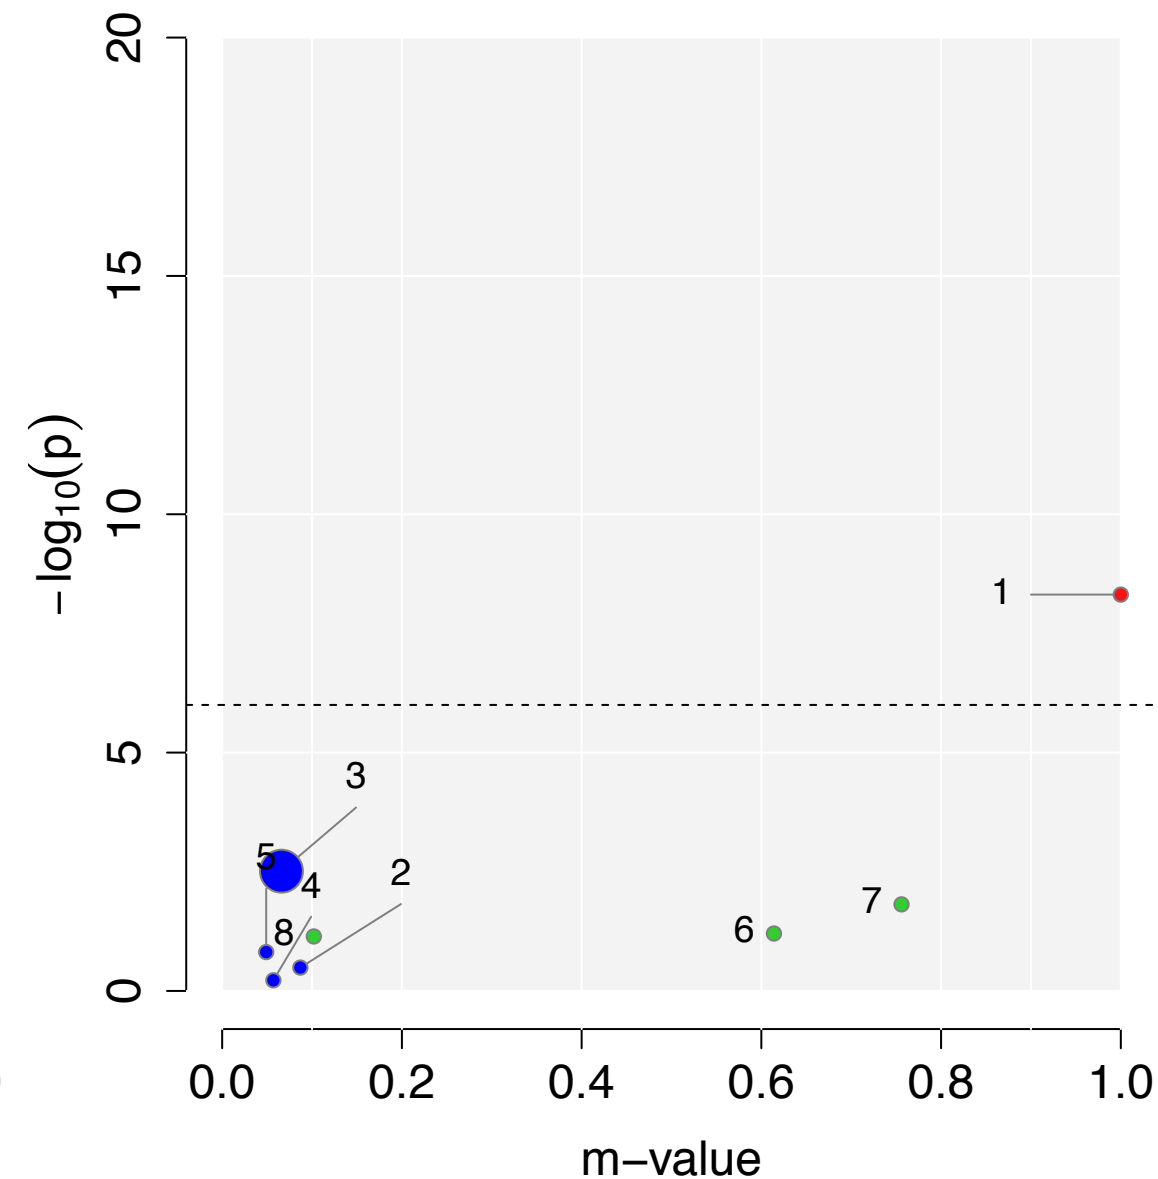

# rs10265001 (Meta $P = 4.93 \times 10^{-9}$ )

Gene : *MRPS33*, *BRAF*

## GWAS P-value

- 0.0011 ● 1.SCZ
- $1.31 \times 10^{-7}$  ● 2.BIP
- 0.0008 ● 3.MD
- 0.0008 ● 4.ASD
- 0.5910 ● 5.ADHD
- 0.9701 ● 6.TS
- 0.6232 ● 7.ANO
- 0.0198 ● 8.OCD

FE summary

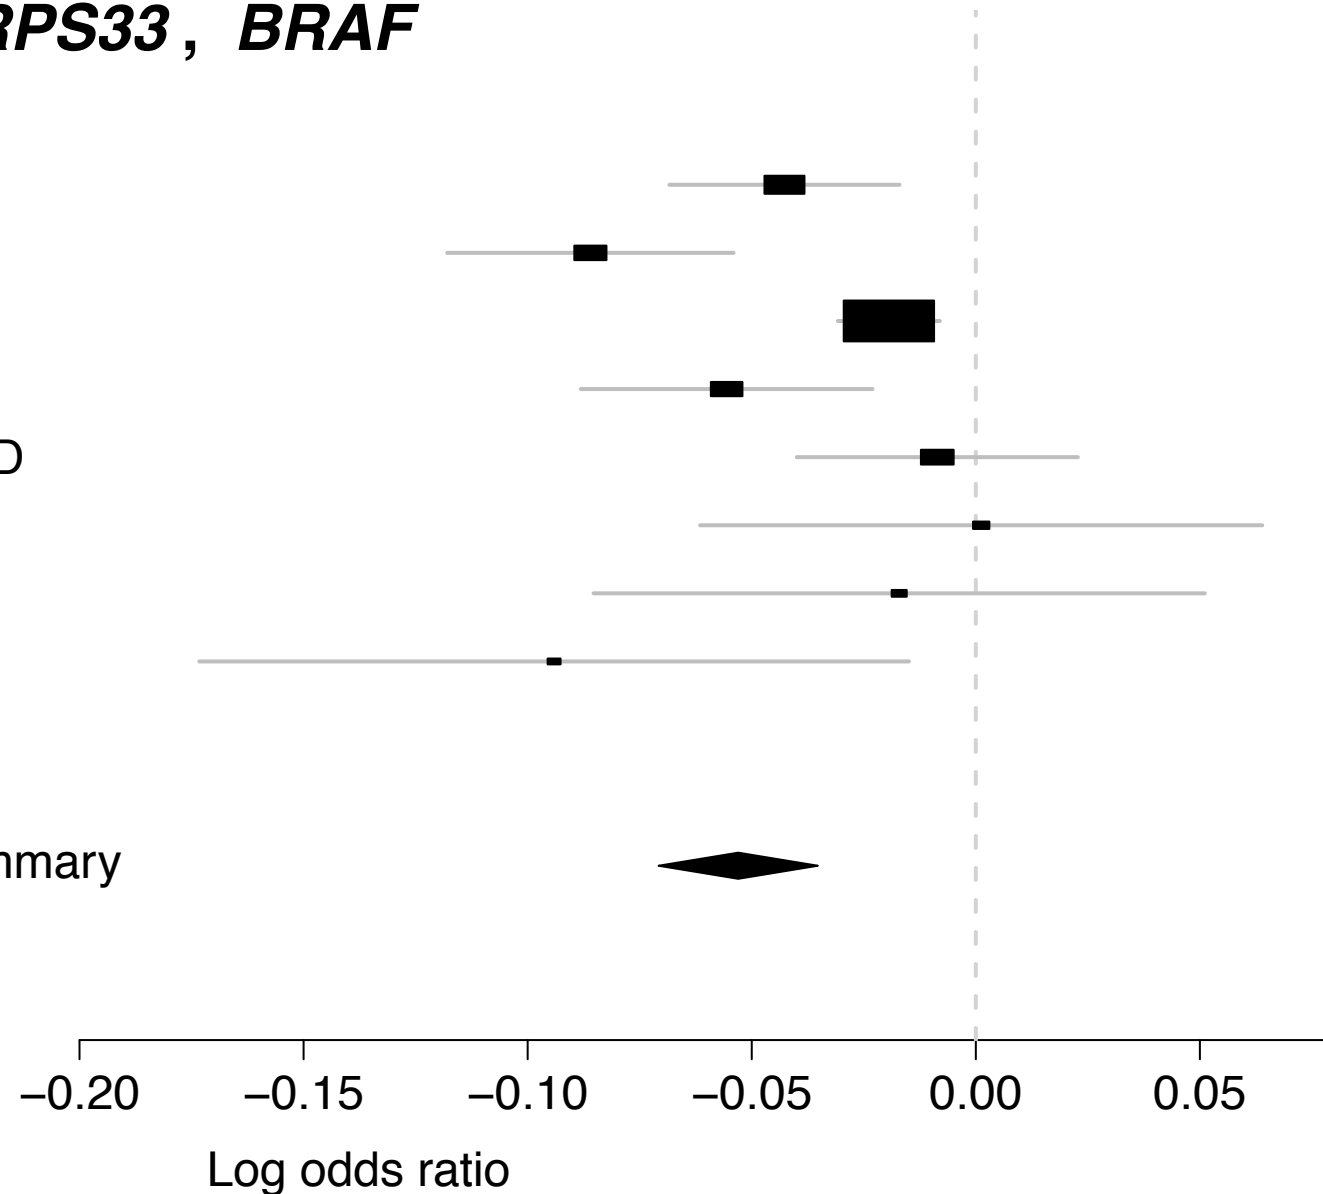

## PM-Plot

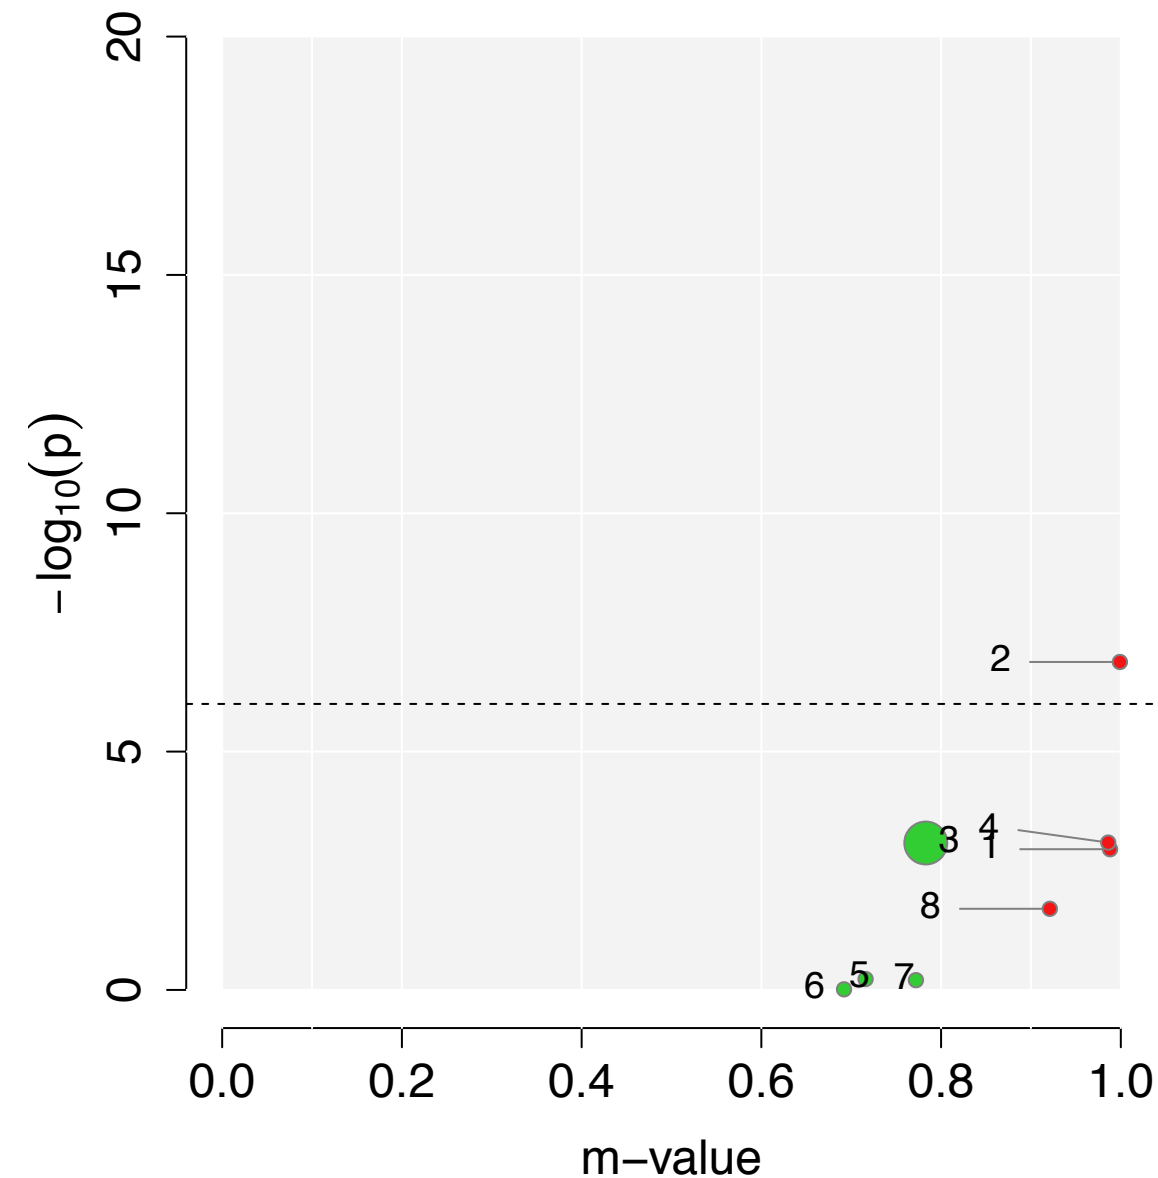

# rs10491964 (Meta $P = 2.4e \times 10^{-8}$ )

Gene : *CACNA1C*

## GWAS P-value

- 6.58 x 10<sup>-8</sup> ● 1.SCZ
- 0.0010 ● 2.BIP
- 3.08 x 10<sup>-5</sup> ● 3.MD
- 0.8527 ● 4.ASD
- 0.0789 ● 5.ADHD
- 0.7110 ● 6.TS
- 0.8903 ● 7.ANO
- 0.9769 ● 8.OCD

FE summary

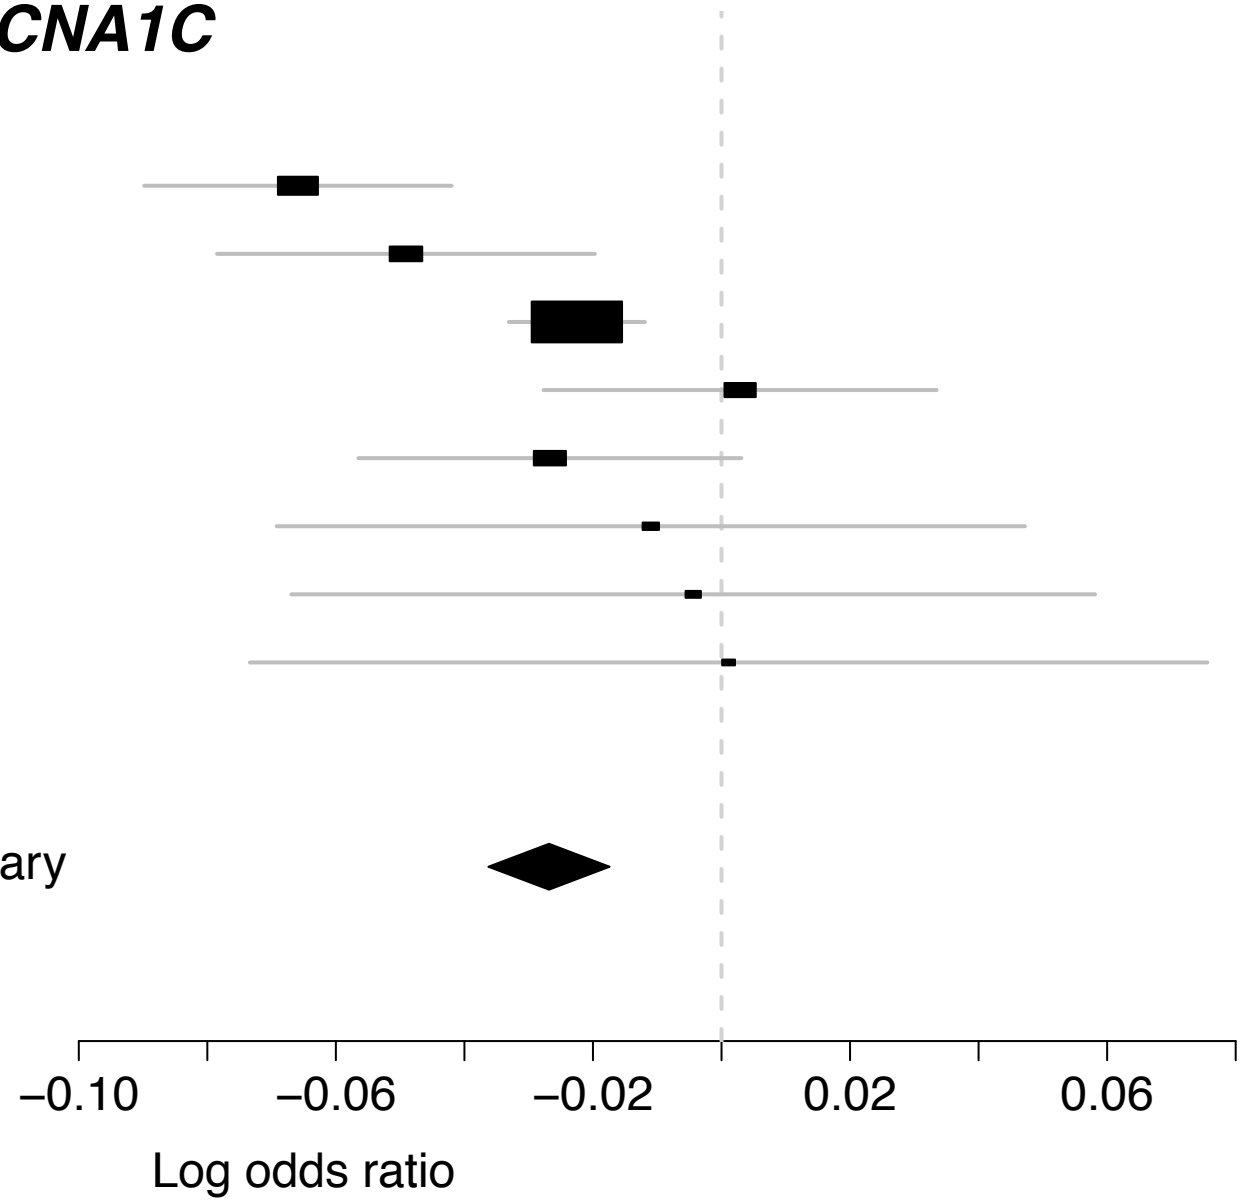

## PM-Plot

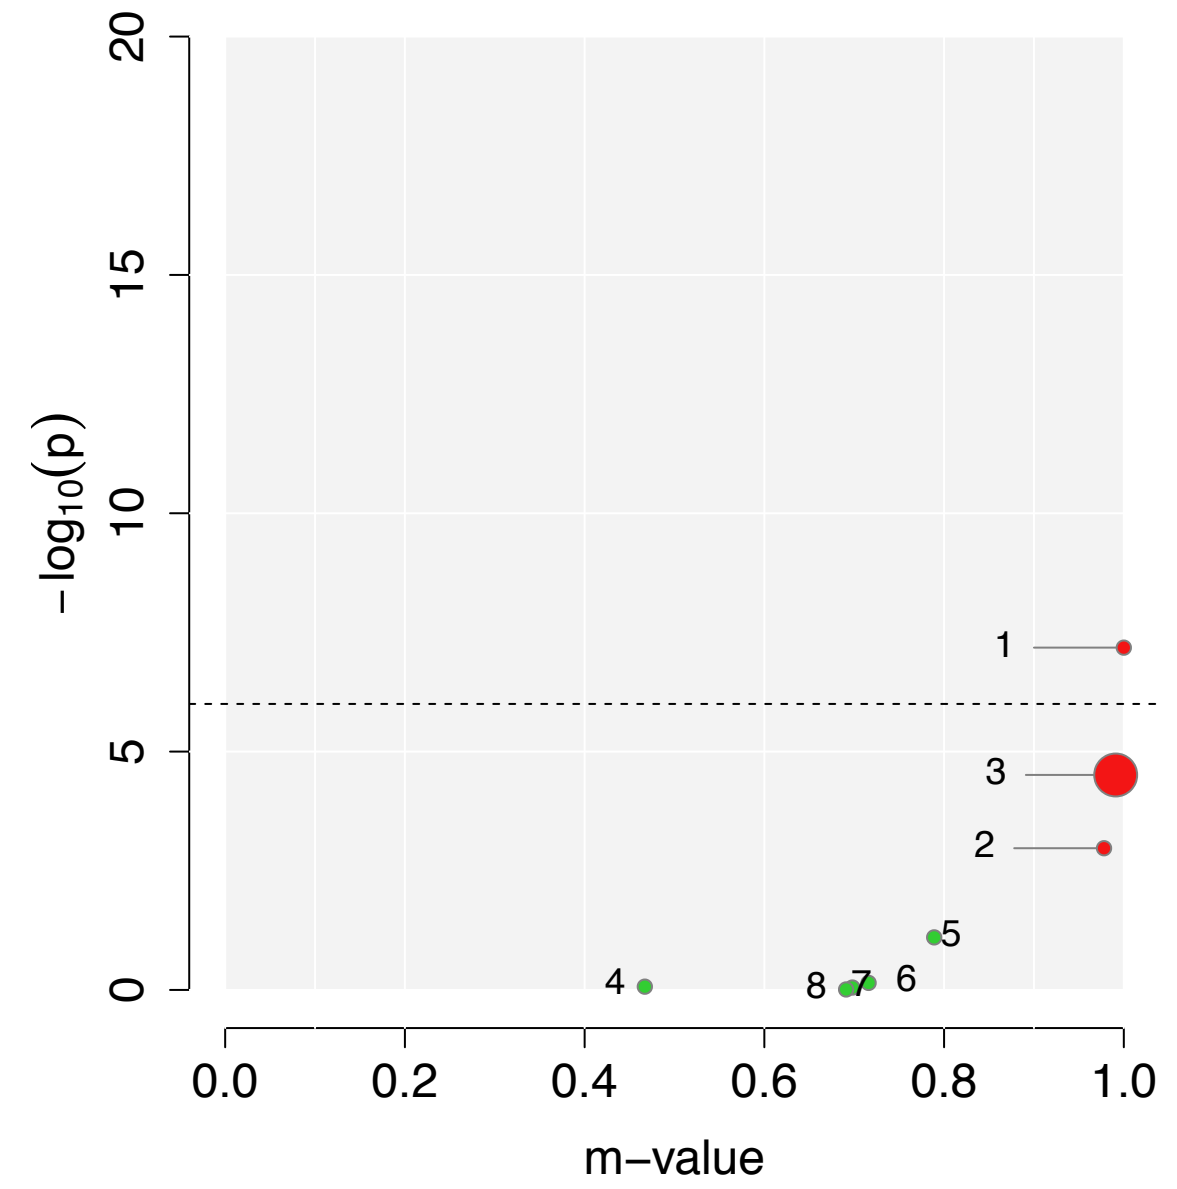

# rs10514301 (Meta $P = 1.87 \times 10^{-9}$ )

Gene : *MEF2C*

## GWAS P-value

- 0.5840 ● 1.SCZ
- 0.0229 ● 2.BIP
- $3.22 \times 10^{-10}$  ● 3.MD
- 0.1062 ● 4.ASD
- 0.6830 ● 5.ADHD
- 0.0239 ● 6.TS
- 0.0188 ● 7.ANO
- 0.8244 ● 8.OCD

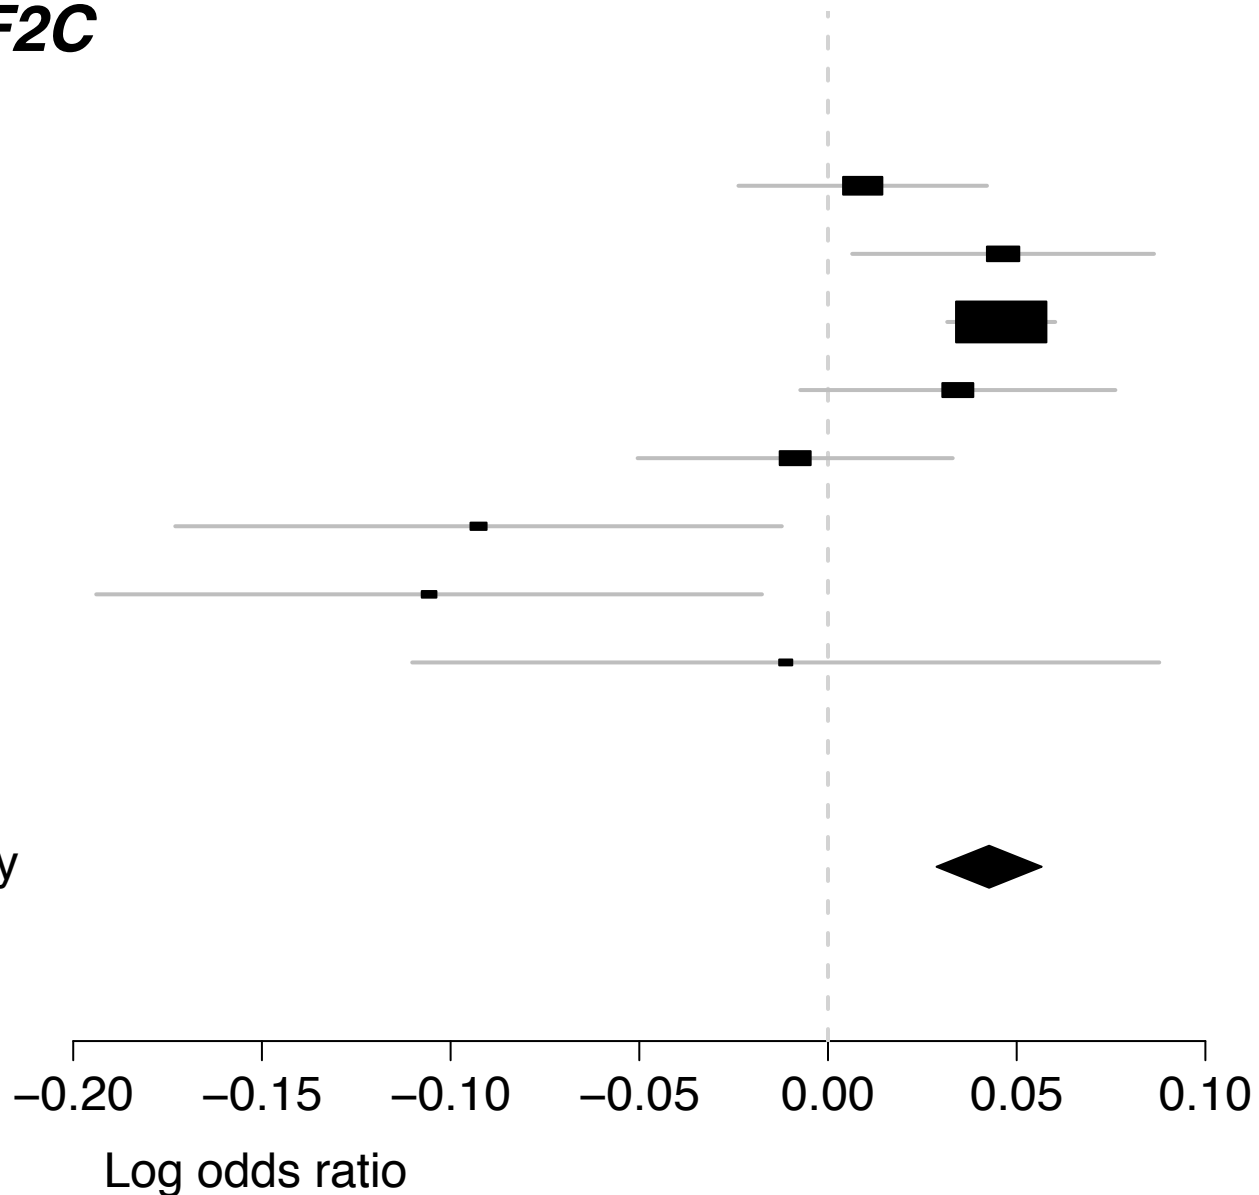

## PM-Plot

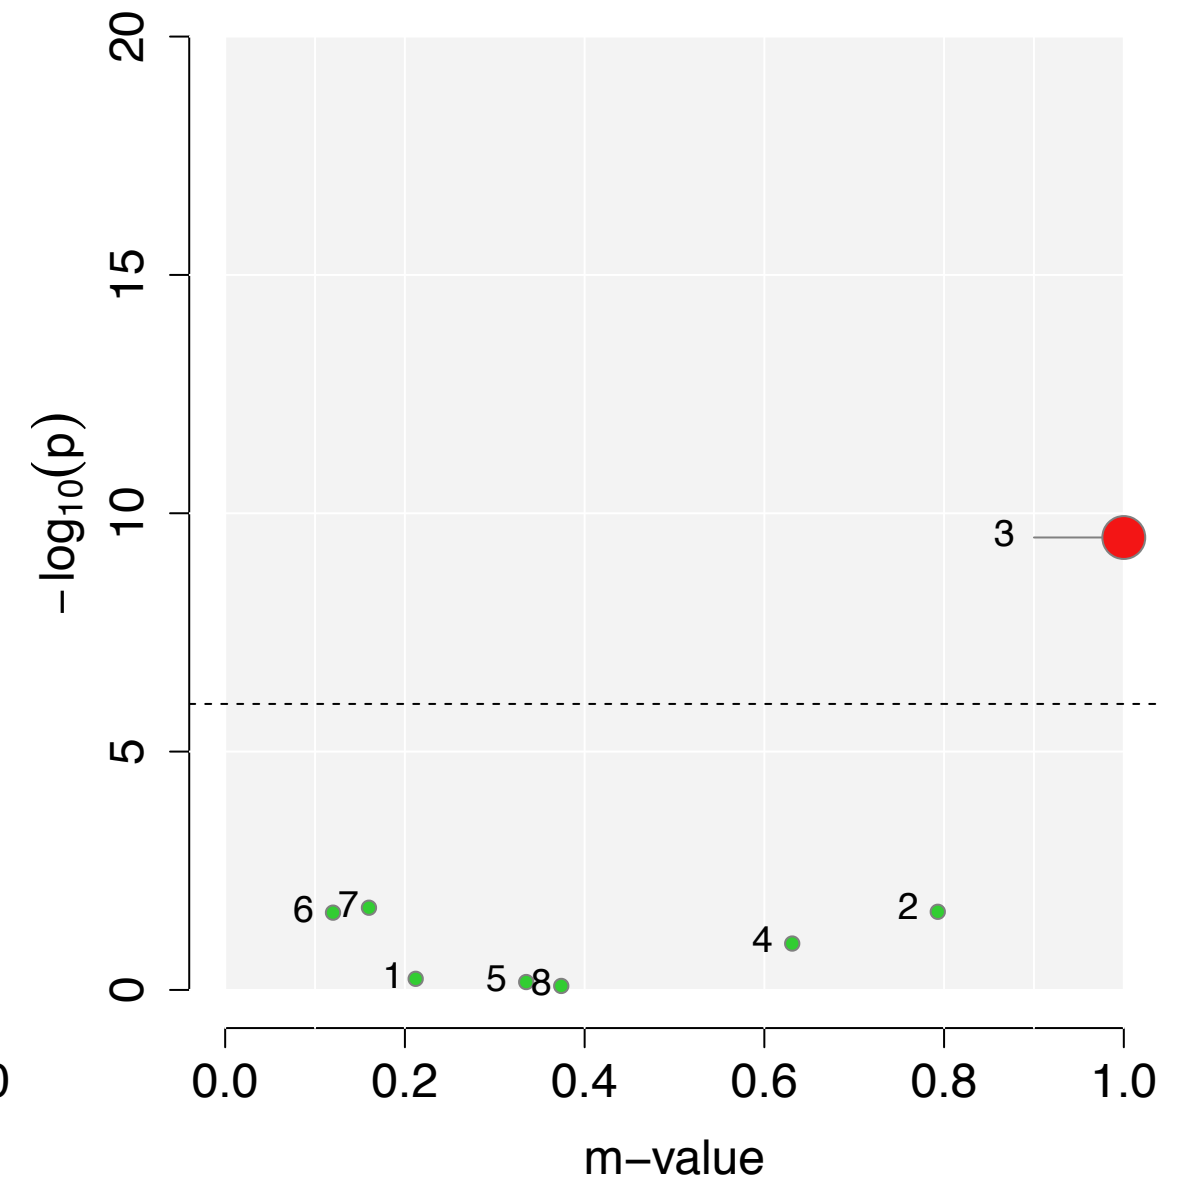

# rs10745841 (Meta $P = 1.05 \times 10^{-8}$ )

Gene : *ANKS1B*

## GWAS P-value

- $6.00 \times 10^{-7}$  ● 1.SCZ
- $4.57 \times 10^{-7}$  ● 2.BIP
- 0.2130 ● 3.MD
- 0.0807 ● 4.ASD
- 0.2648 ● 5.ADHD
- 0.3373 ● 6.TS
- 0.5549 ● 7.ANO
- 0.9089 ● 8.OCD

FE summary

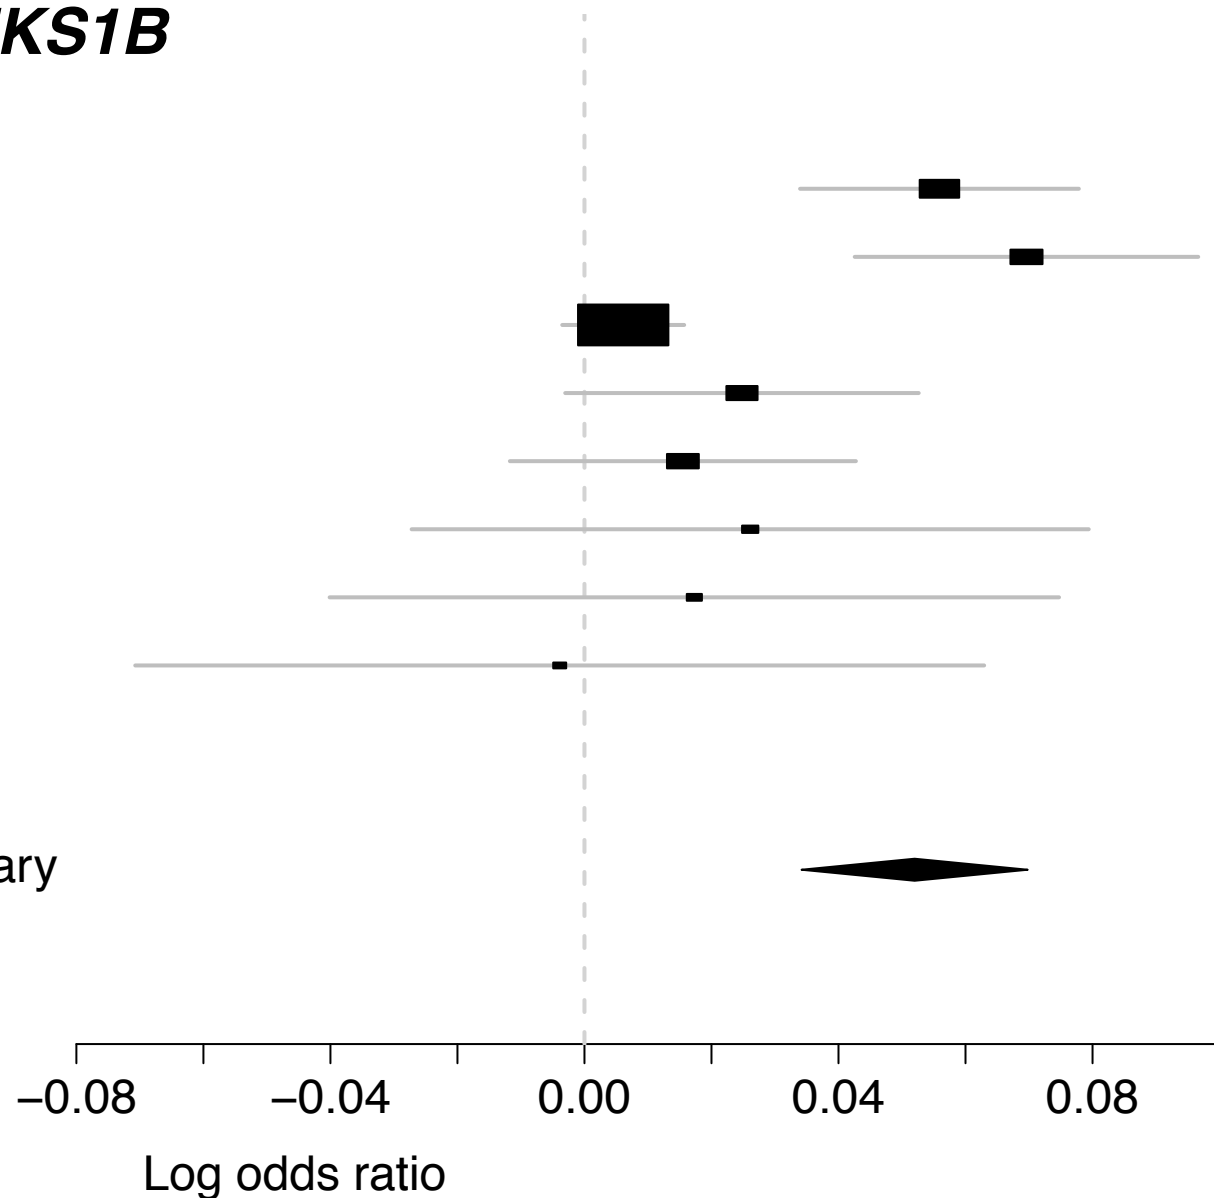

## PM-Plot

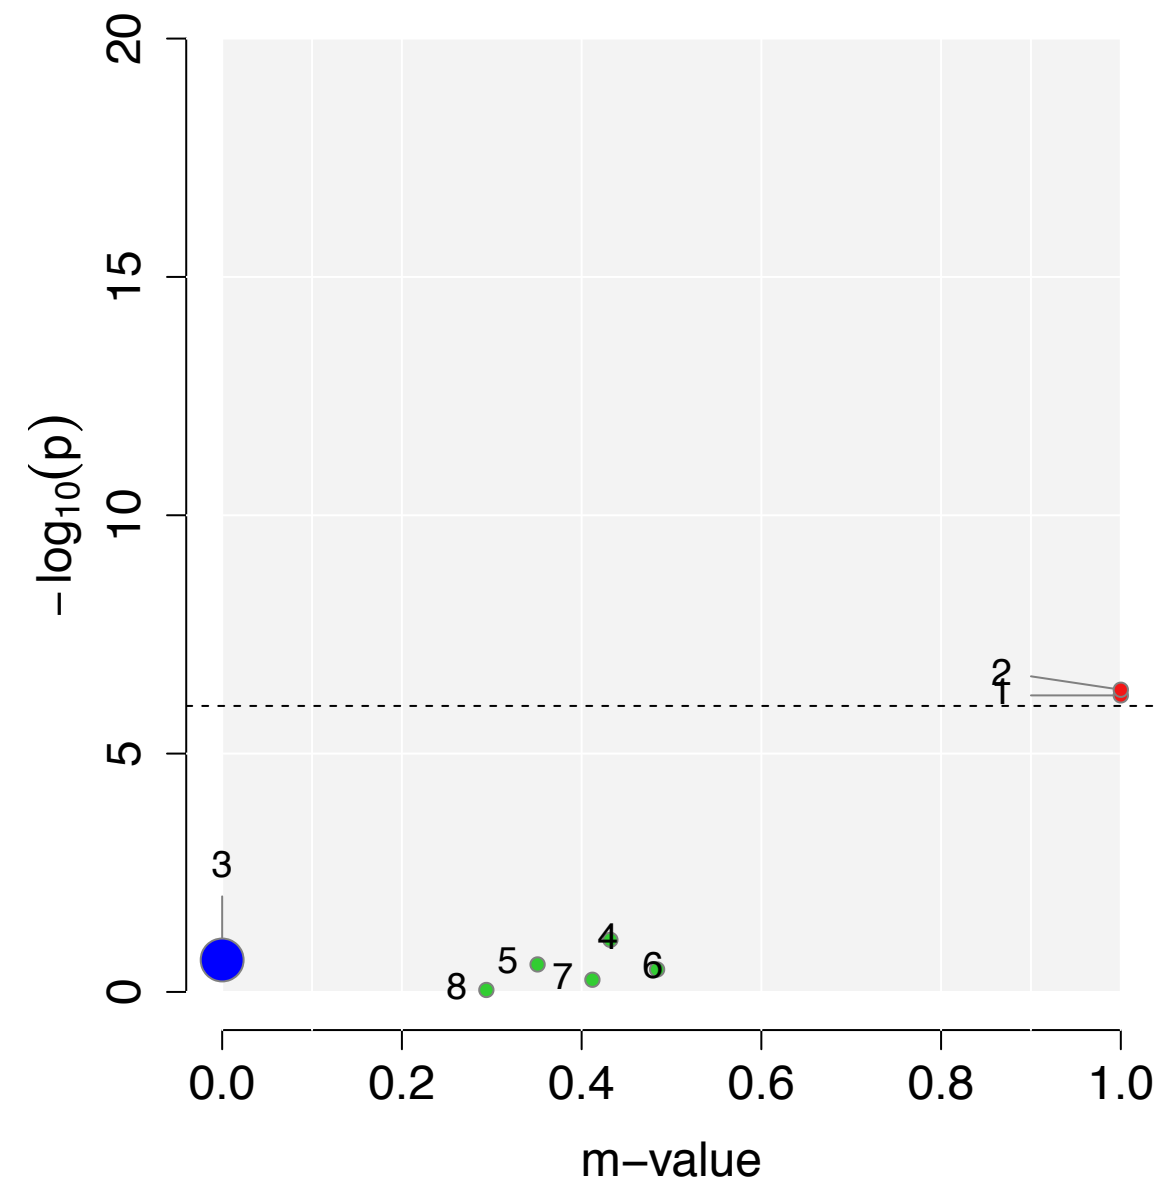



# rs10791097 (Meta $P = 2.38 \times 10^{-10}$ )

Gene : **SNX19**

## GWAS P-value

- 2.10 x 10<sup>-12</sup> ● 1.SCZ
- 0.0305 ● 2.BIP
- 0.0286 ● 3.MD
- 0.9772 ● 4.ASD
- 0.1546 ● 5.ADHD
- 0.2140 ● 6.TS
- 0.4574 ● 7.ANO
- 0.9952 ● 8.OCD

FE summary

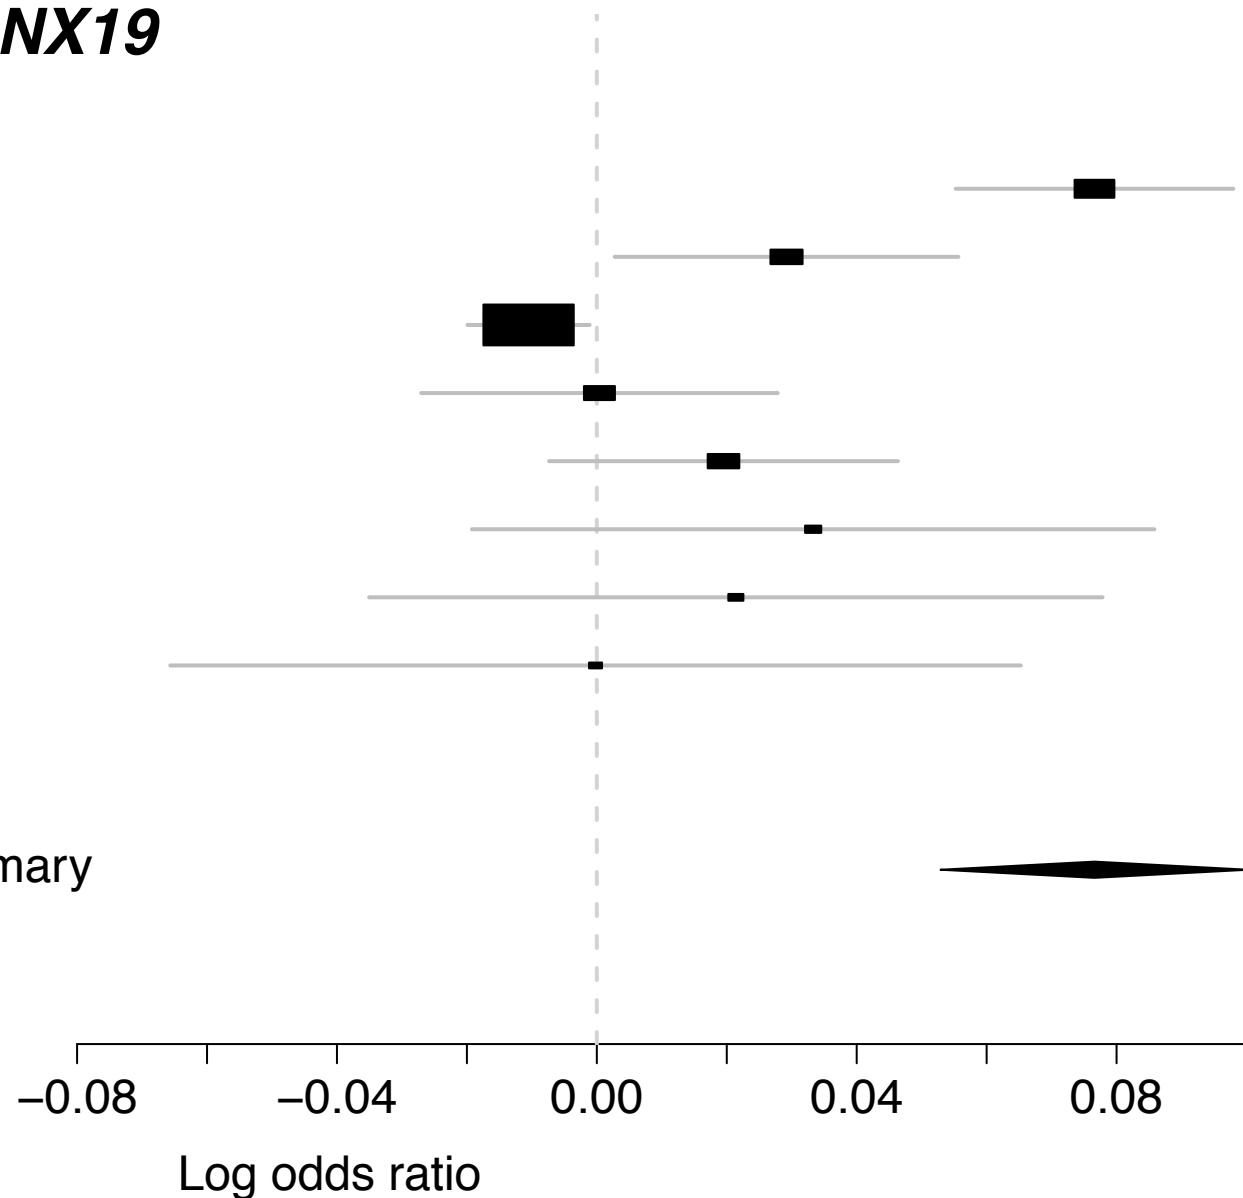

## PM-Plot

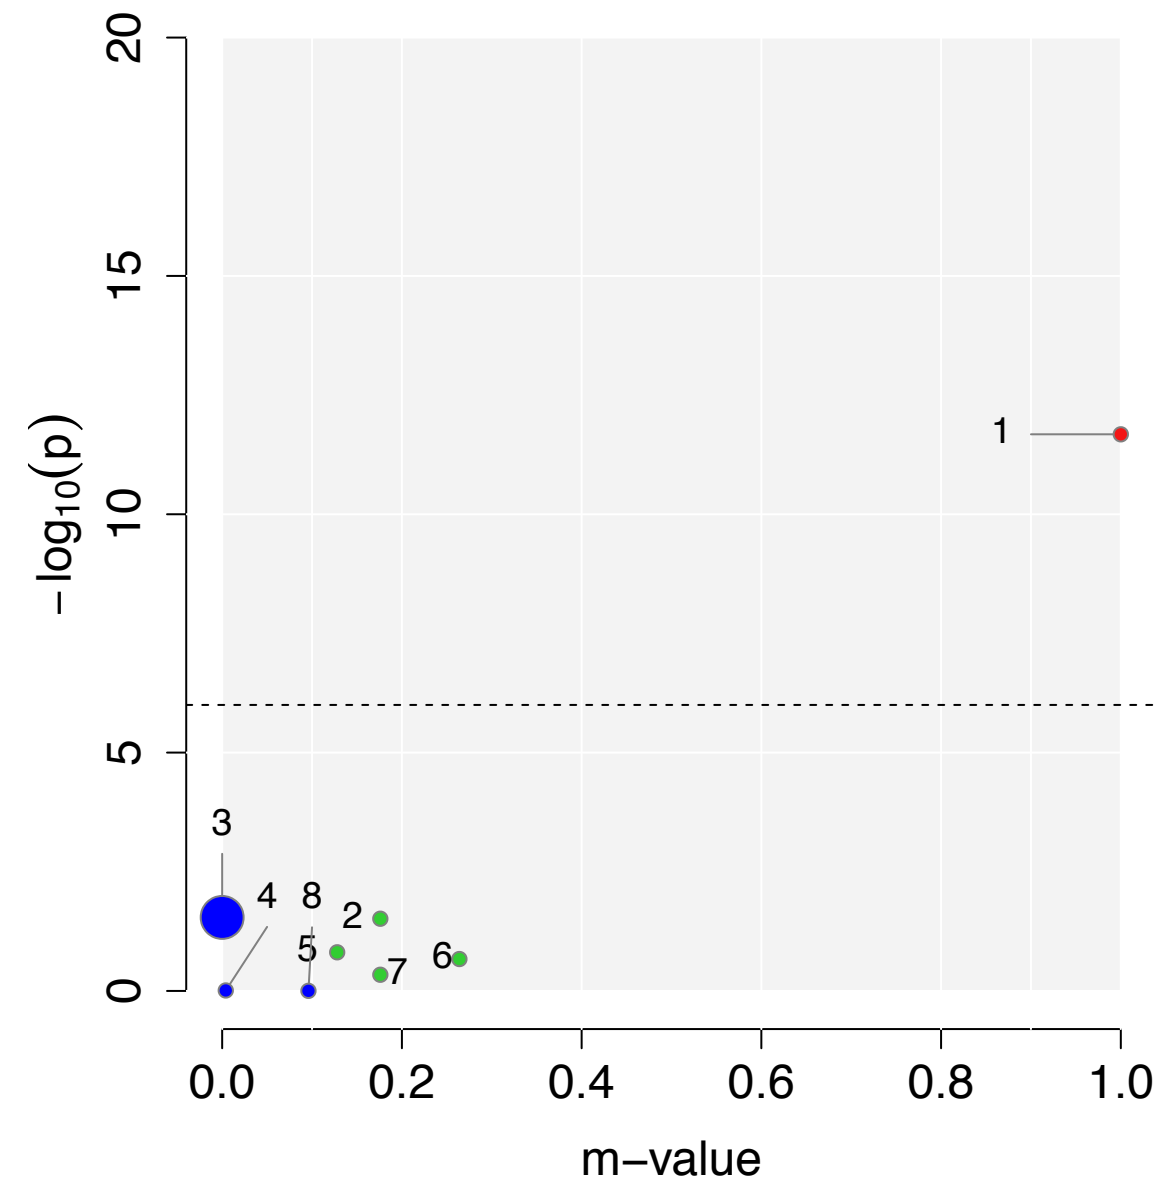

# rs10883832 (Meta $P = 2.54 \times 10^{-14}$ )

Gene : *NT5C2*, *CNNM2*

## GWAS P-value

- 1.85 x 10<sup>-16</sup> ● 1.SCZ
- 0.0006 ● 2.BIP
- 3.65 x 10<sup>-5</sup> ● 3.MD
- 0.9736 ● 4.ASD
- 0.0446 ● 5.ADHD
- 0.1113 ● 6.TS
- 0.6019 ● 7.ANO
- 0.3036 ● 8.OCD

FE summary

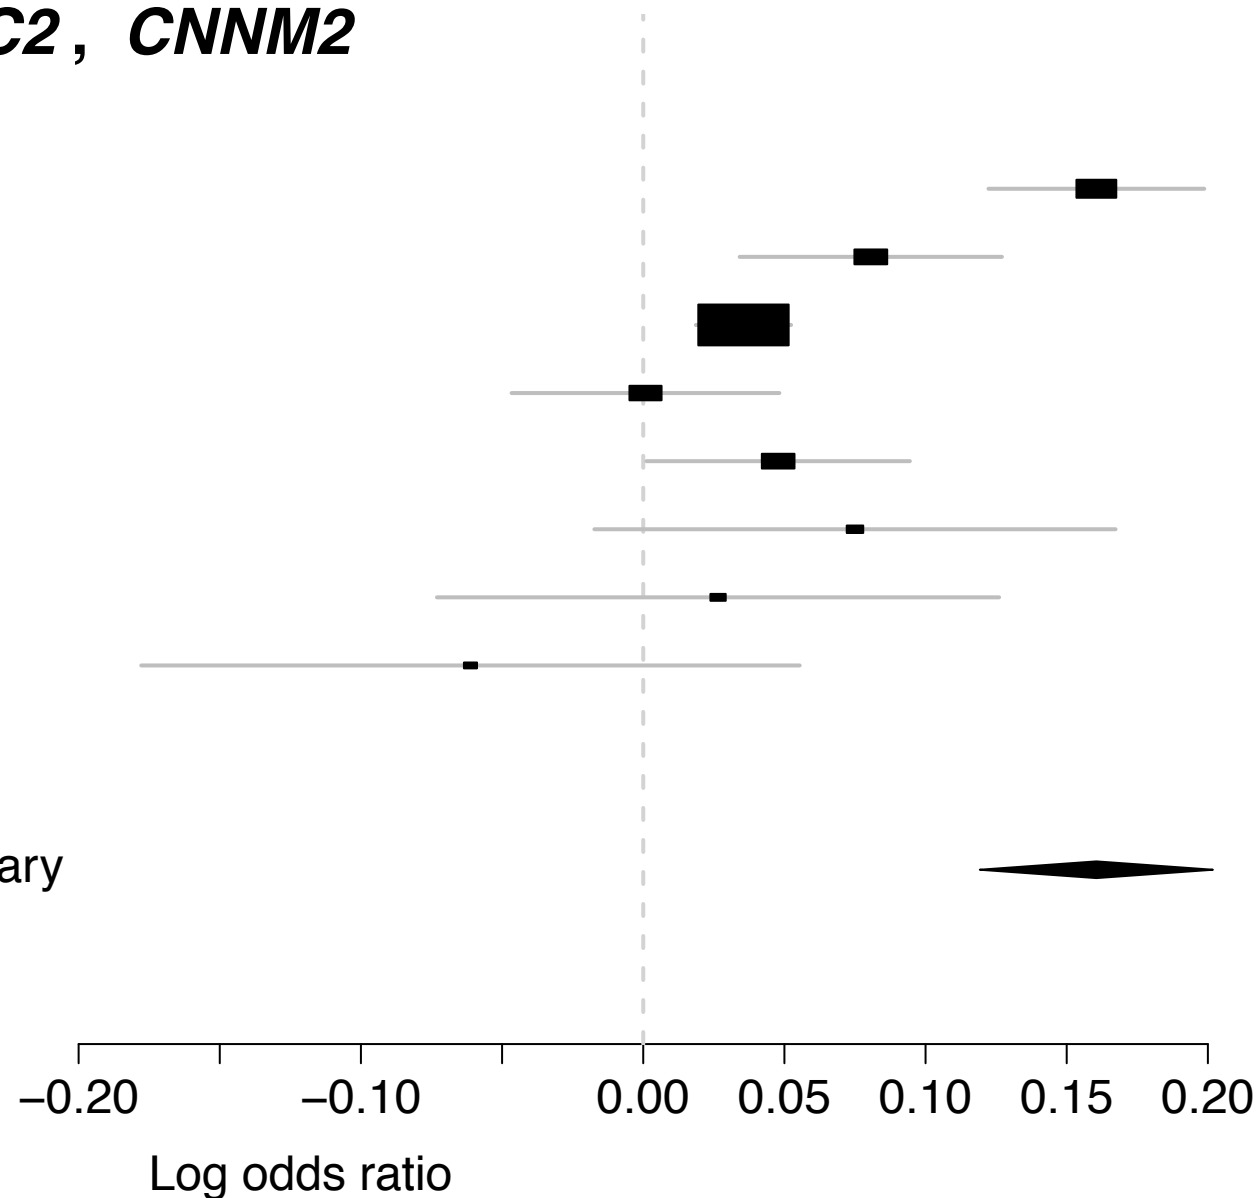

## PM-Plot

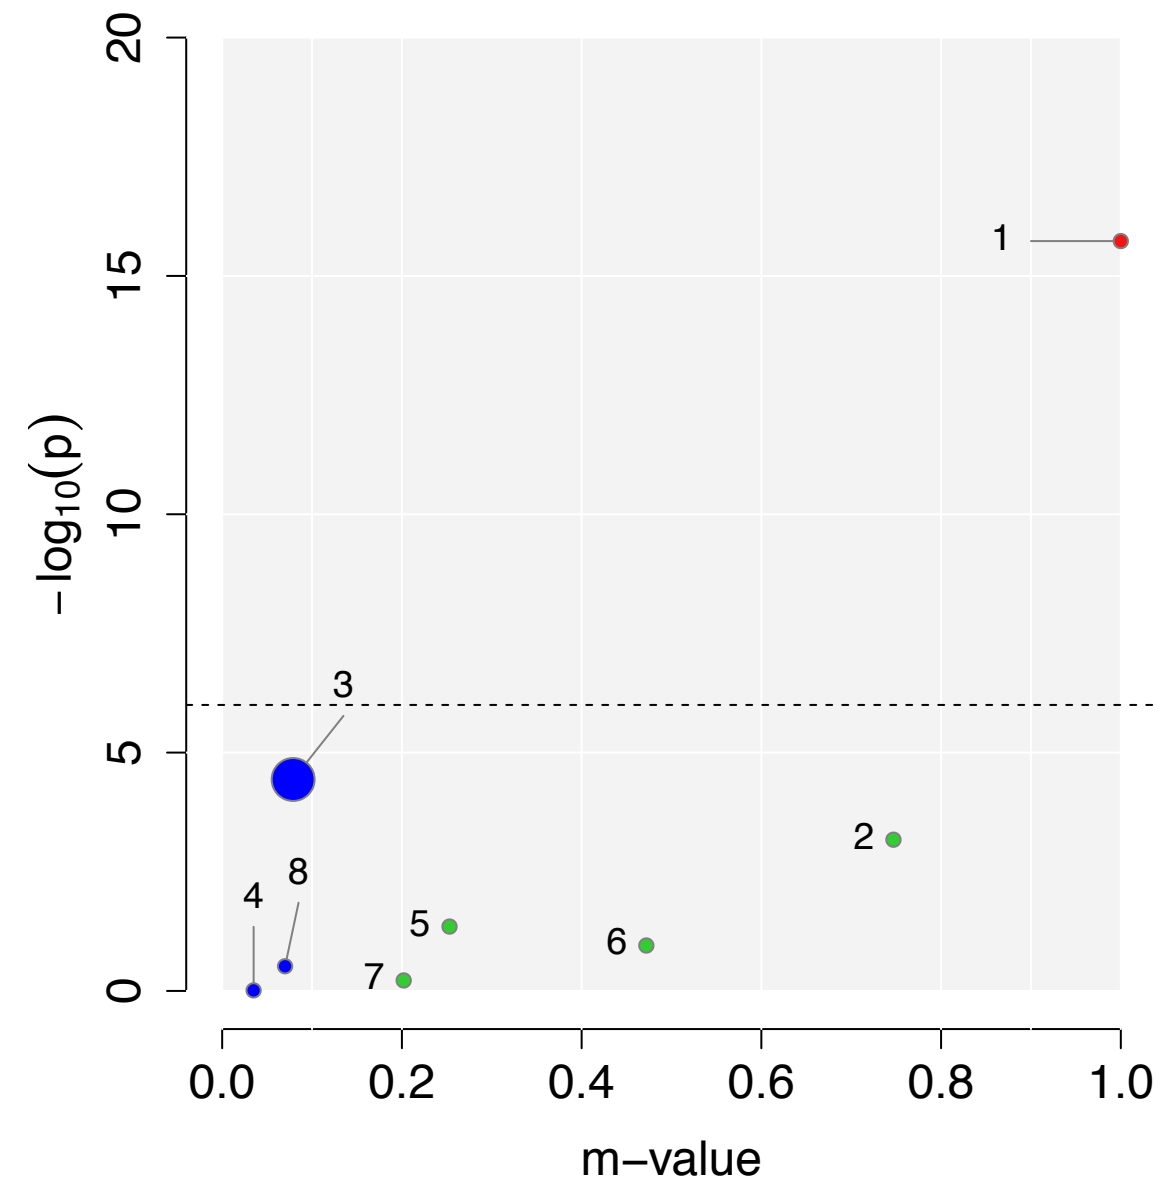

# rs11231640 (Meta $P = 8.32 \times 10^{-9}$ )

Gene : *RCOR2*, *MARK2*

## GWAS P-value

- 2.63 x 10<sup>-6</sup> ● 1.SCZ
- 2.14 x 10<sup>-6</sup> ● 2.BIP
- 4.43 x 10<sup>-5</sup> ● 3.MD
- 0.6118 ● 4.ASD
- 0.1051 ● 5.ADHD
- 0.0676 ● 6.TS
- 0.0372 ● 7.ANO
- 0.5800 ● 8.OCD

FE summary

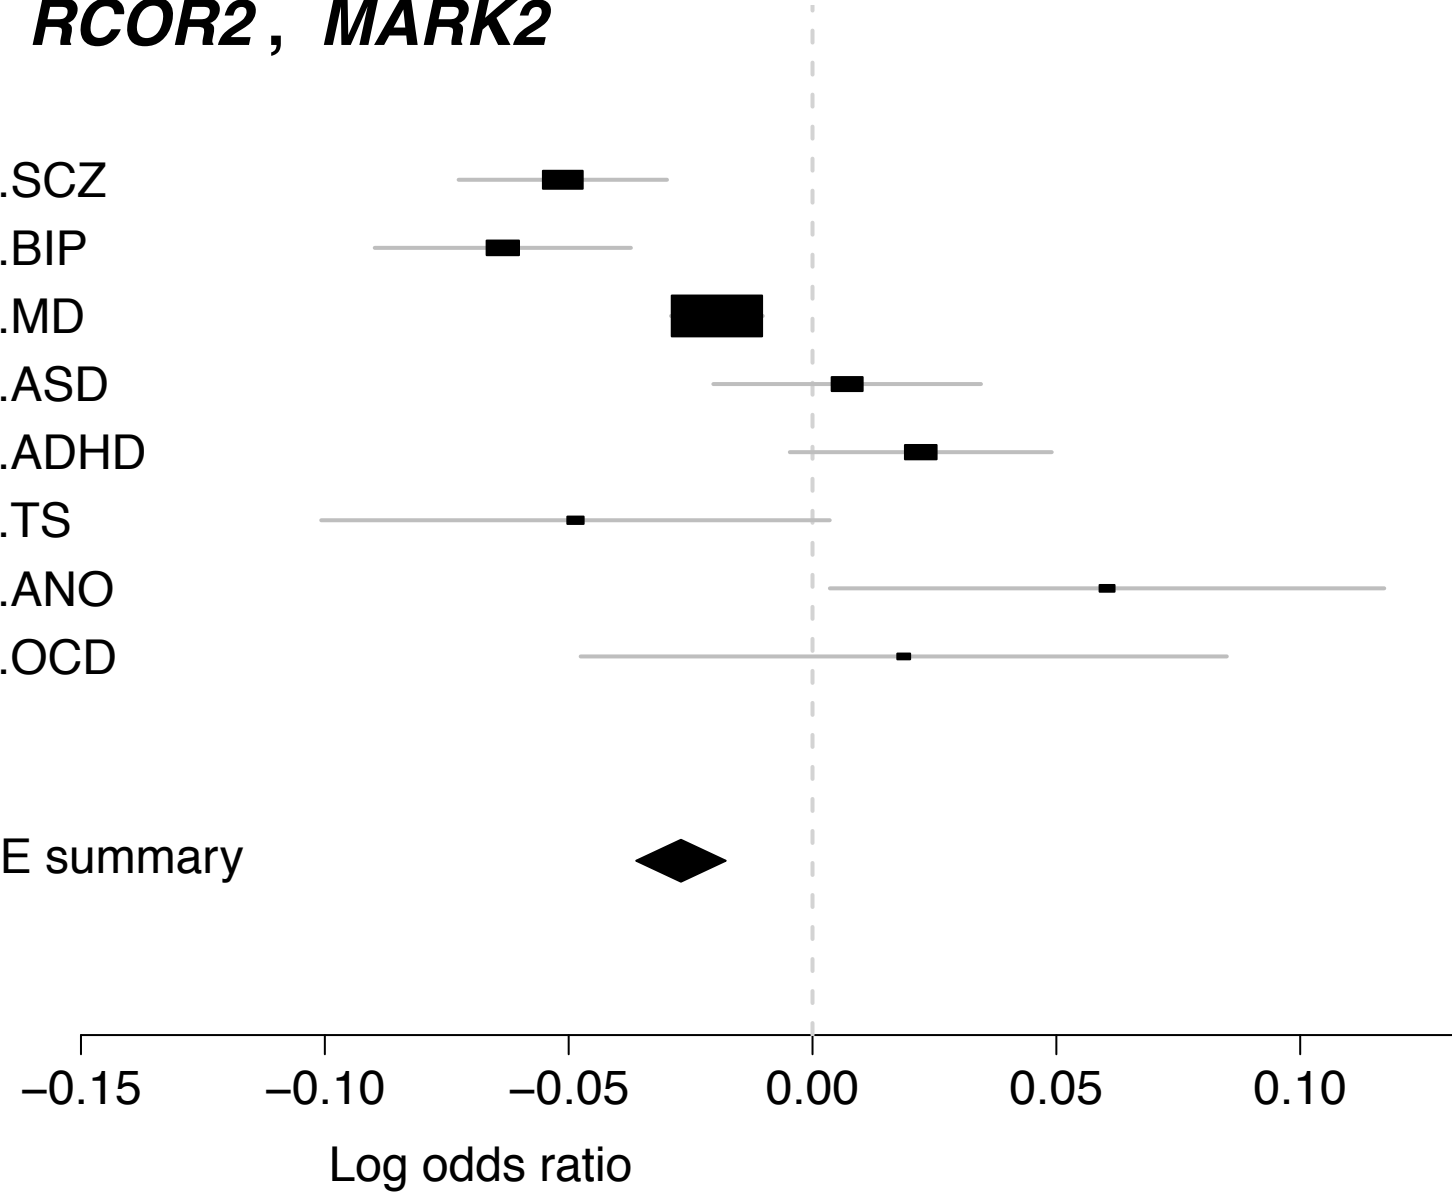

## PM-Plot

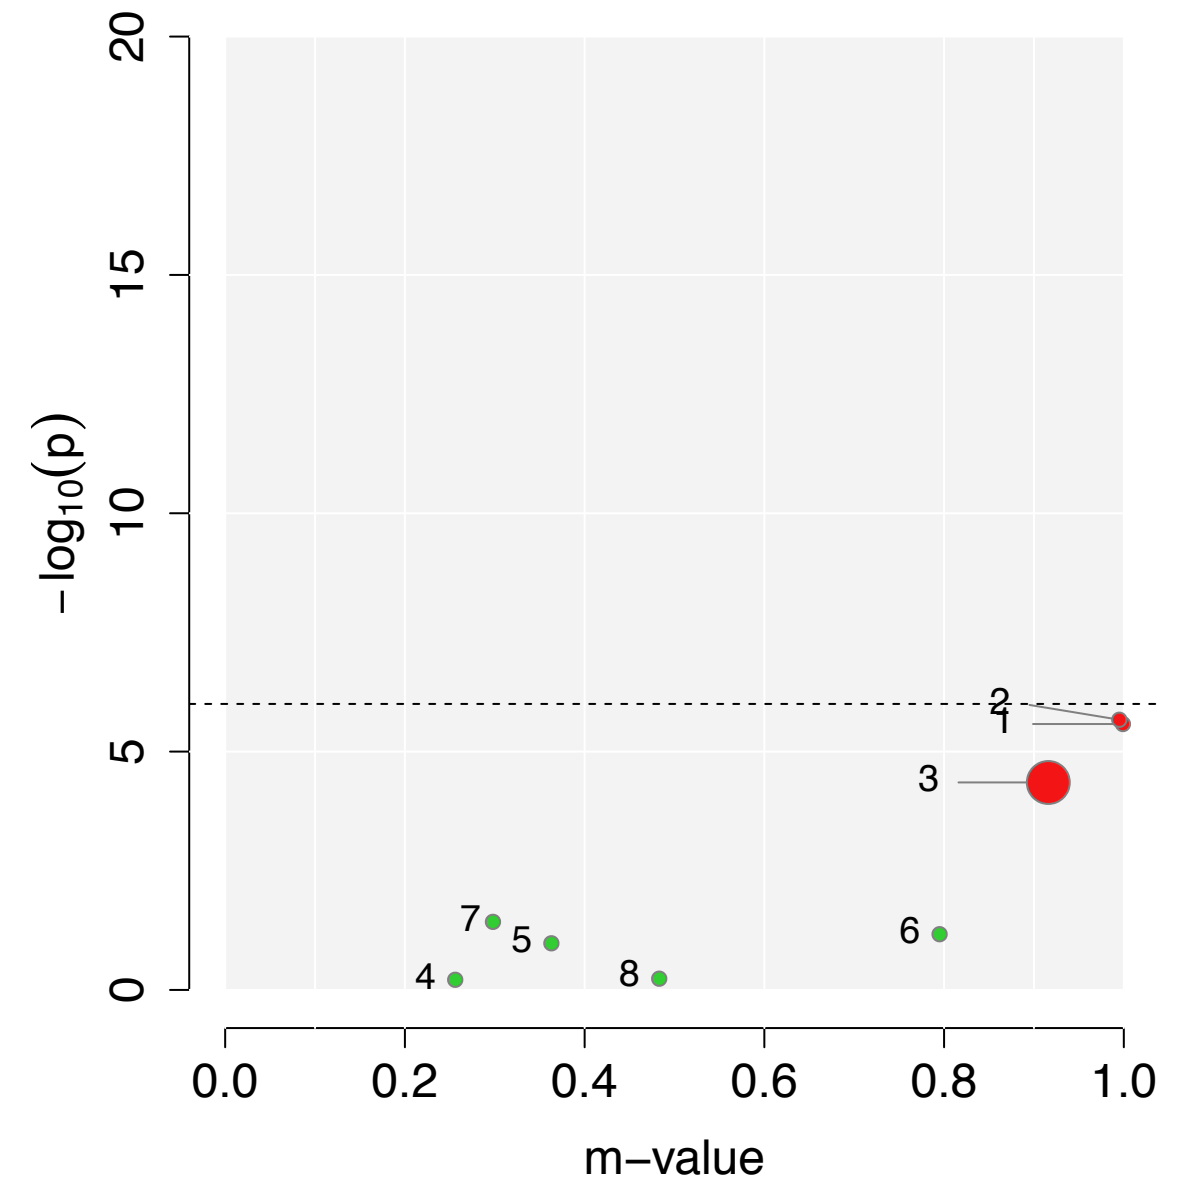

# rs11570190 (Meta $P = 1.23 \times 10^{-10}$ )

Gene : *CTNND1*, *BTBD18*

## GWAS P-value

- 9.39 x 10<sup>-7</sup> ● 1.SCZ
- 0.8545 ● 2.BIP
- 8.56 x 10<sup>-7</sup> ● 3.MD
- 0.0087 ● 4.ASD
- 0.0005 ● 5.ADHD
- 0.4116 ● 6.TS
- 0.7037 ● 7.ANO
- 0.0319 ● 8.OCD

FE summary

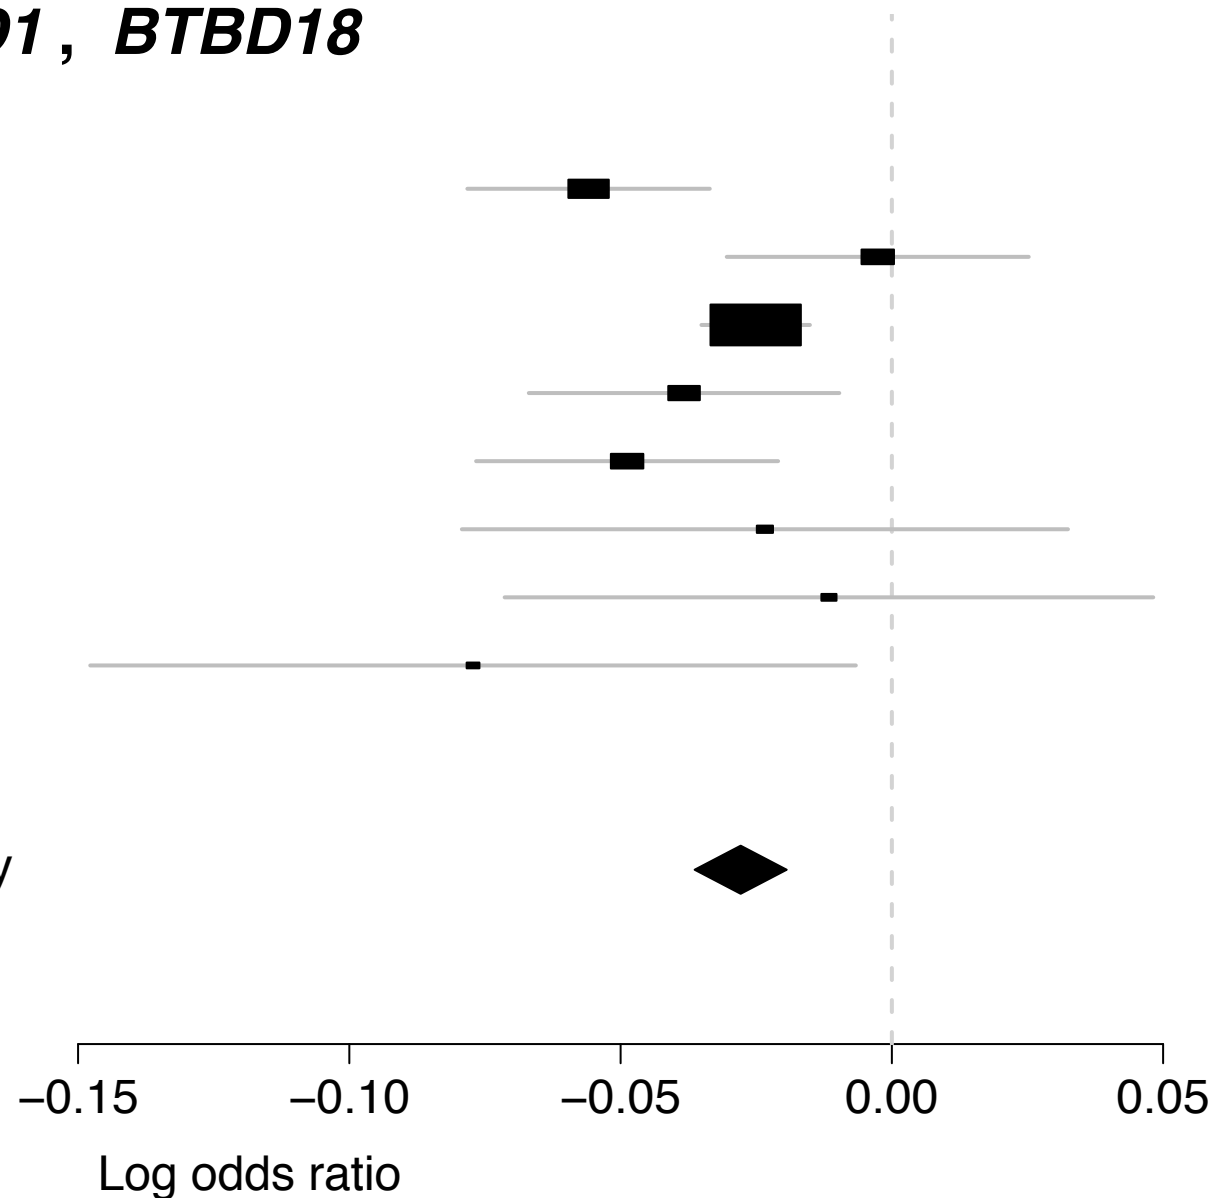

## PM-Plot

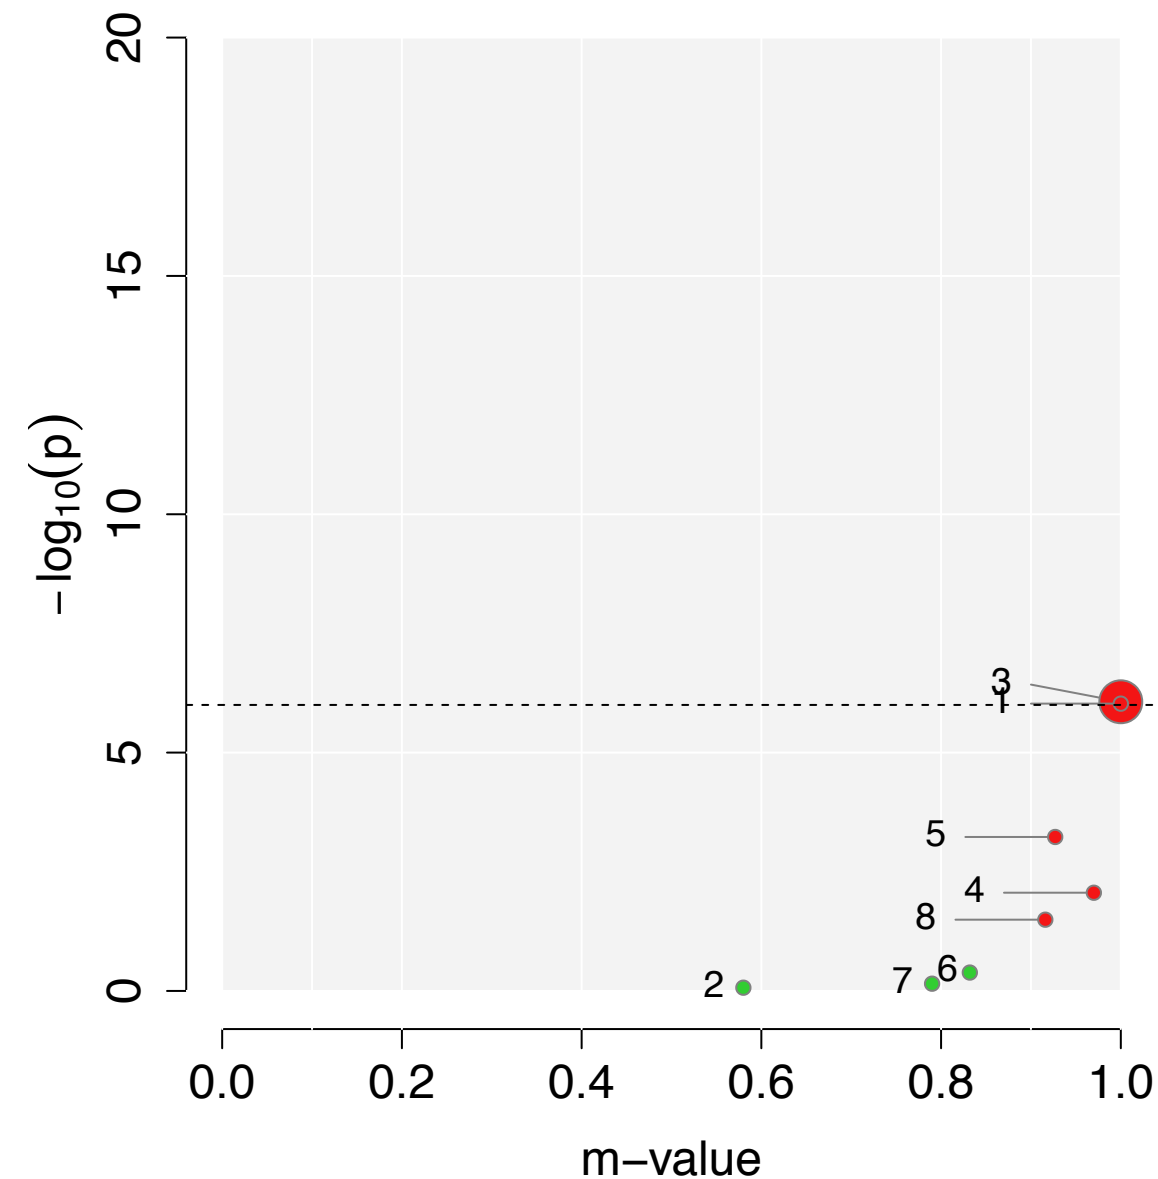

# rs11658257 (Meta $P = 1.81 \times 10^{-8}$ )

Gene : *GID4*, *ATPAF2*

## GWAS P-value

- 8.56 x 10<sup>-9</sup> ● 1.SCZ
- 0.6831 ● 2.BIP
- 0.1951 ● 3.MD
- 0.0118 ● 4.ASD
- 0.1583 ● 5.ADHD
- 0.9206 ● 6.TS
- 0.6521 ● 7.ANO
- 0.0020 ● 8.OCD

FE summary

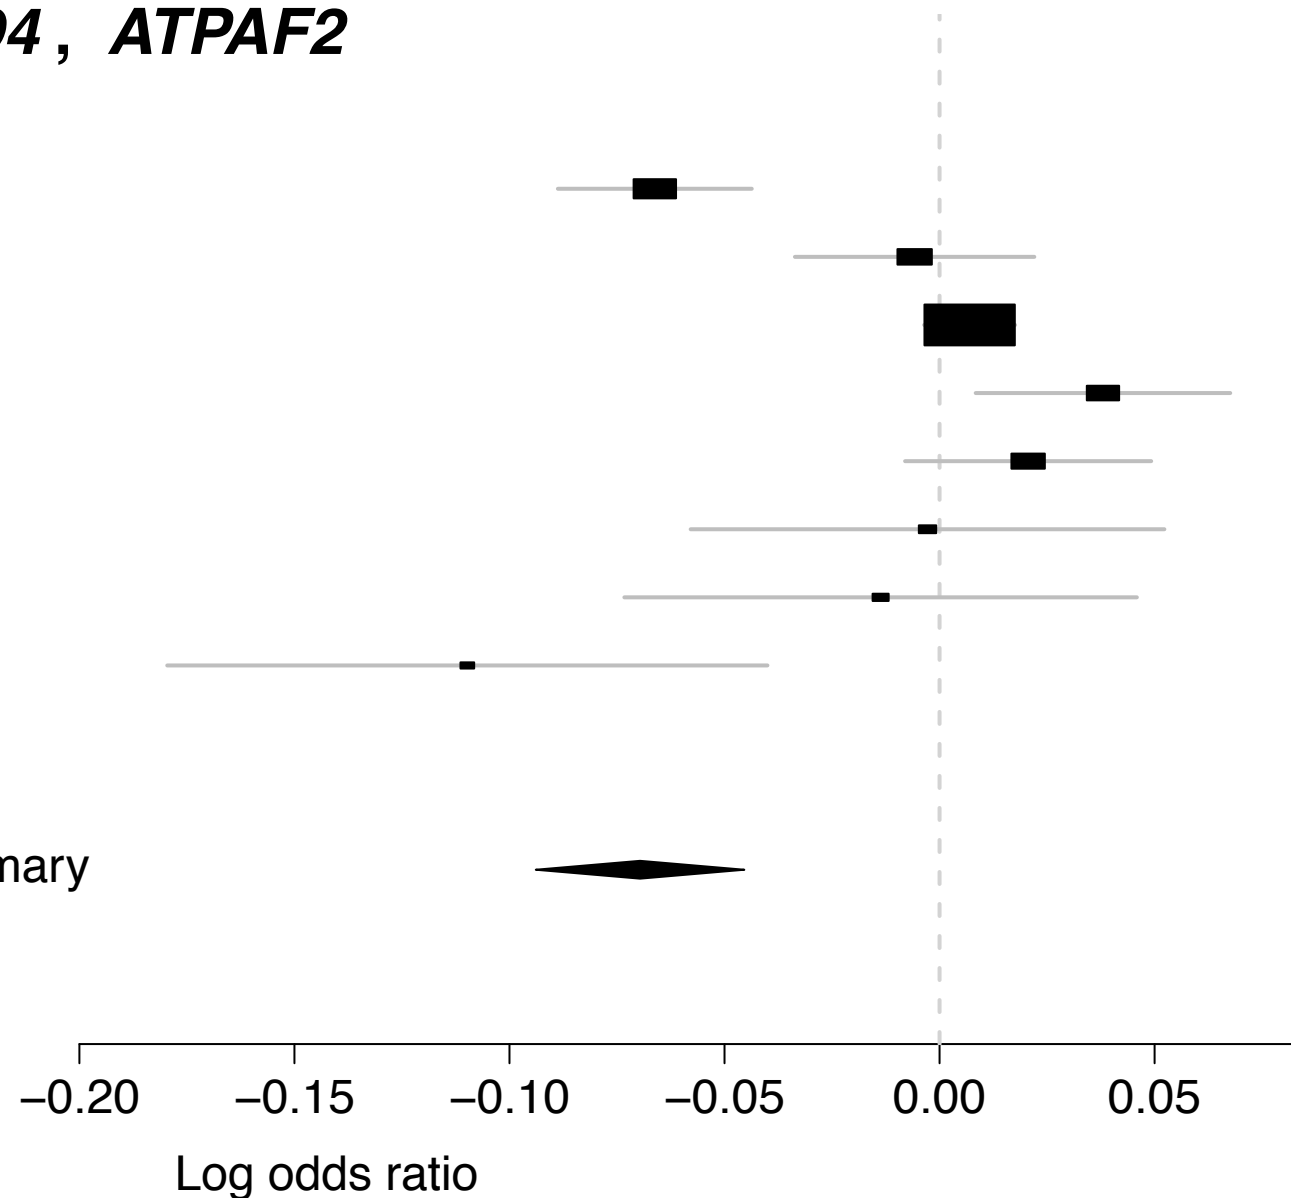

## PM-Plot

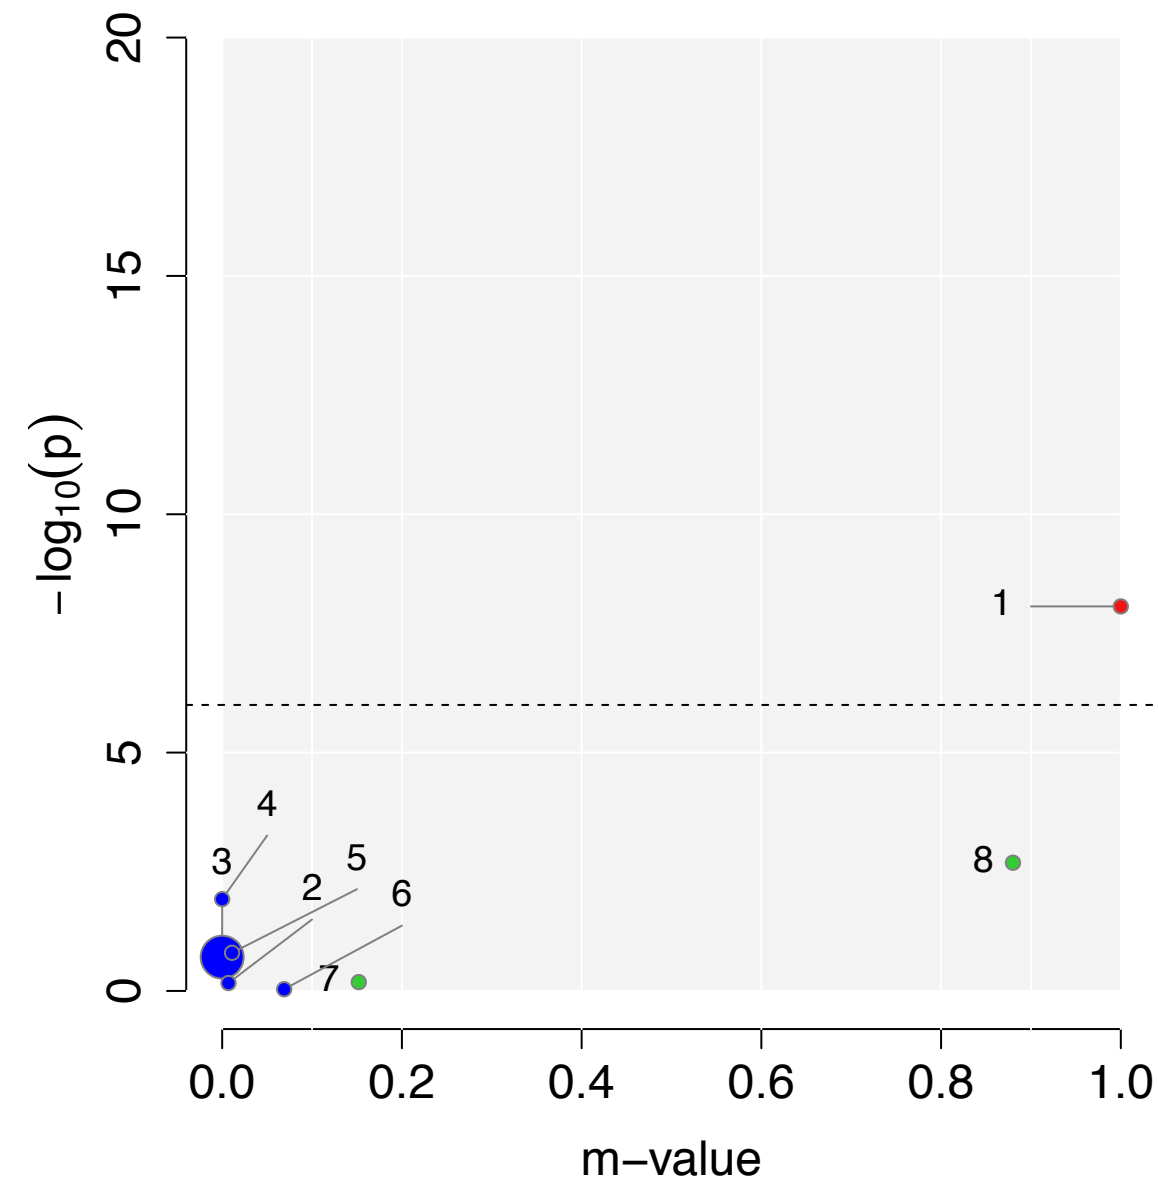

# rs11688767 (Meta $P = 2.34 \times 10^{-14}$ )

Gene : (>200kb)

## GWAS P-value

- 5.06 x 10<sup>-11</sup> ● 1.SCZ
- 0.0048 ● 2.BIP
- 6.18 x 10<sup>-9</sup> ● 3.MD
- 0.0556 ● 4.ASD
- 0.1139 ● 5.ADHD
- 0.8568 ● 6.TS
- 0.1295 ● 7.ANO
- 0.4148 ● 8.OCD

FE summary

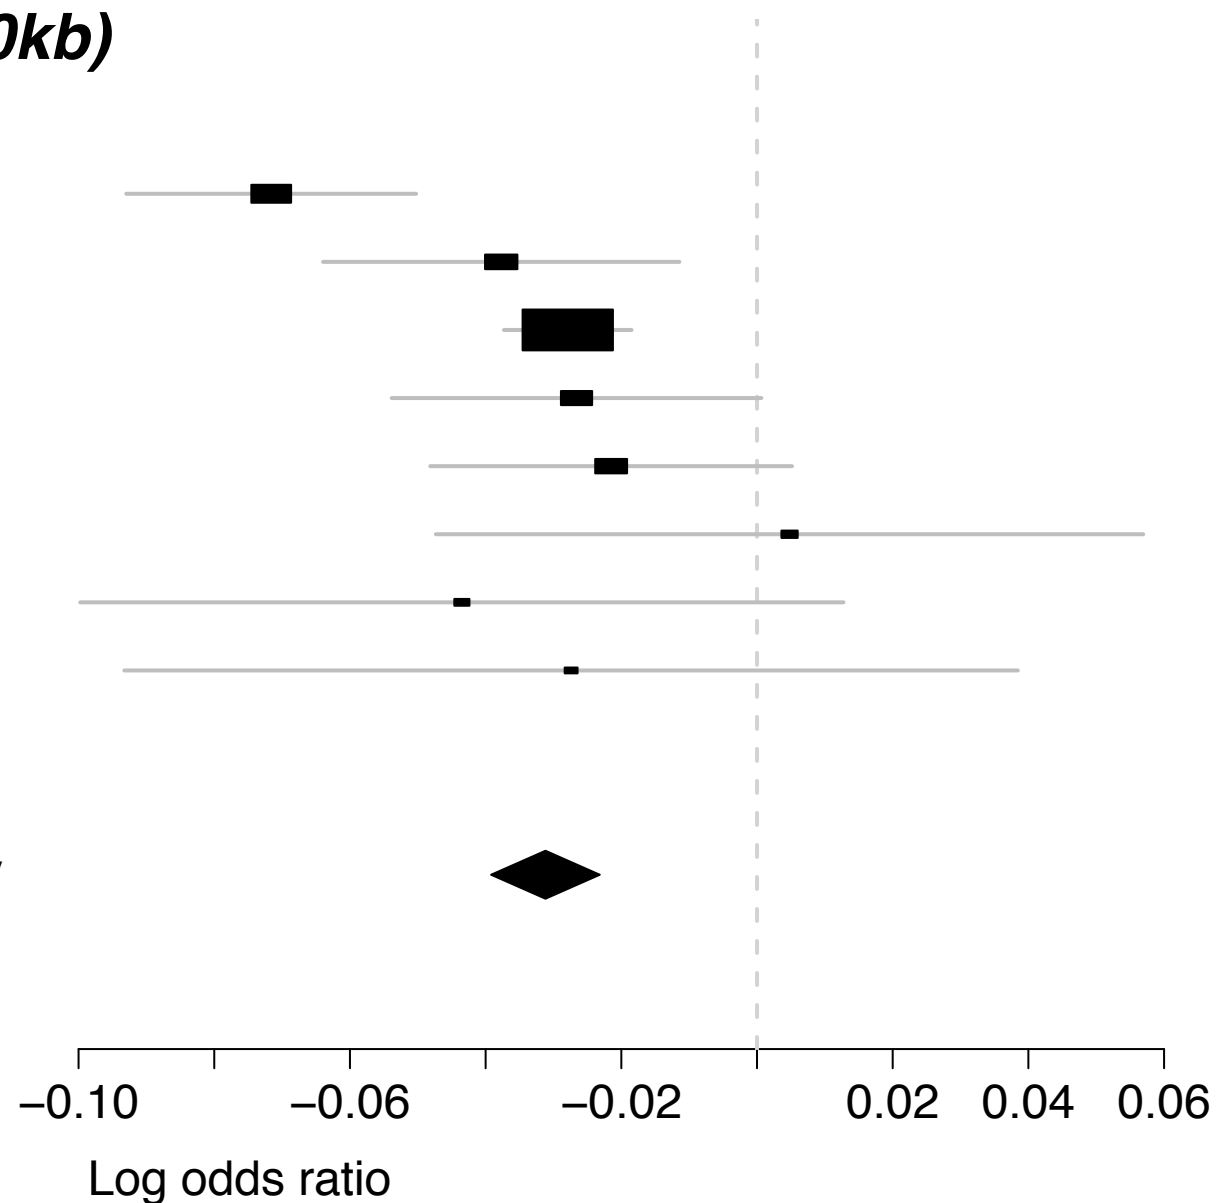

## PM-Plot

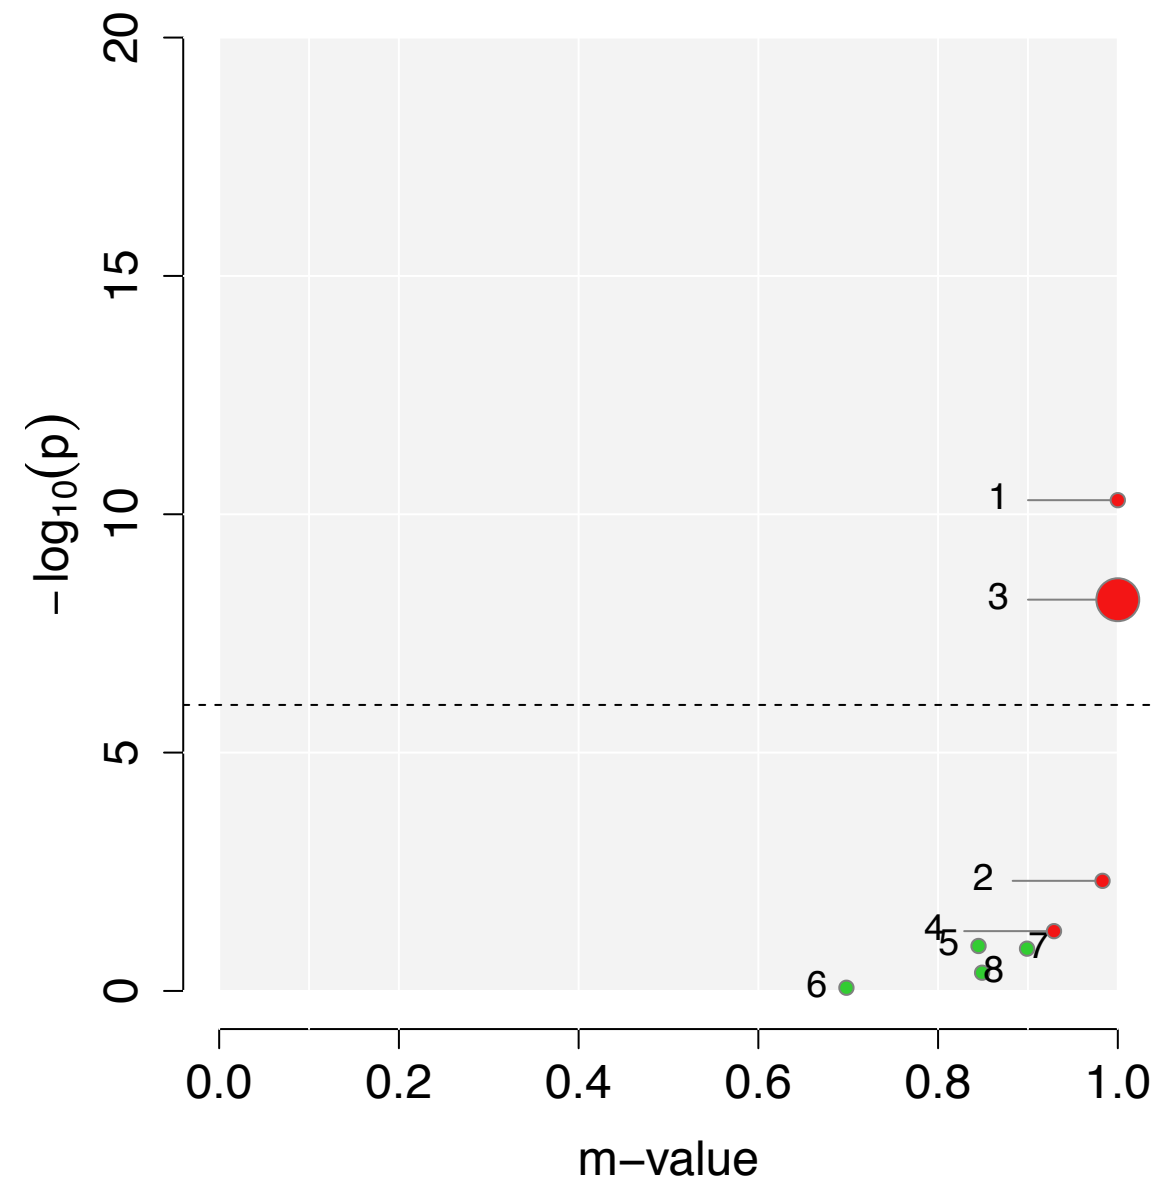

rs11693528 (Meta  $P = 9.77 \times 10^{-13}$ )

Gene : *C2orf69*, *TYW5*

GWAS P-value

- 4.07 x 10<sup>-14</sup> ● 1.SCZ
- 8.12 x 10<sup>-5</sup> ● 2.BIP
- 0.0359 ● 3.MD
- 0.8619 ● 4.ASD
- 0.8457 ● 5.ADHD
- 0.3384 ● 6.TS
- 0.8572 ● 7.ANO
- 0.3687 ● 8.OCD

FE summary

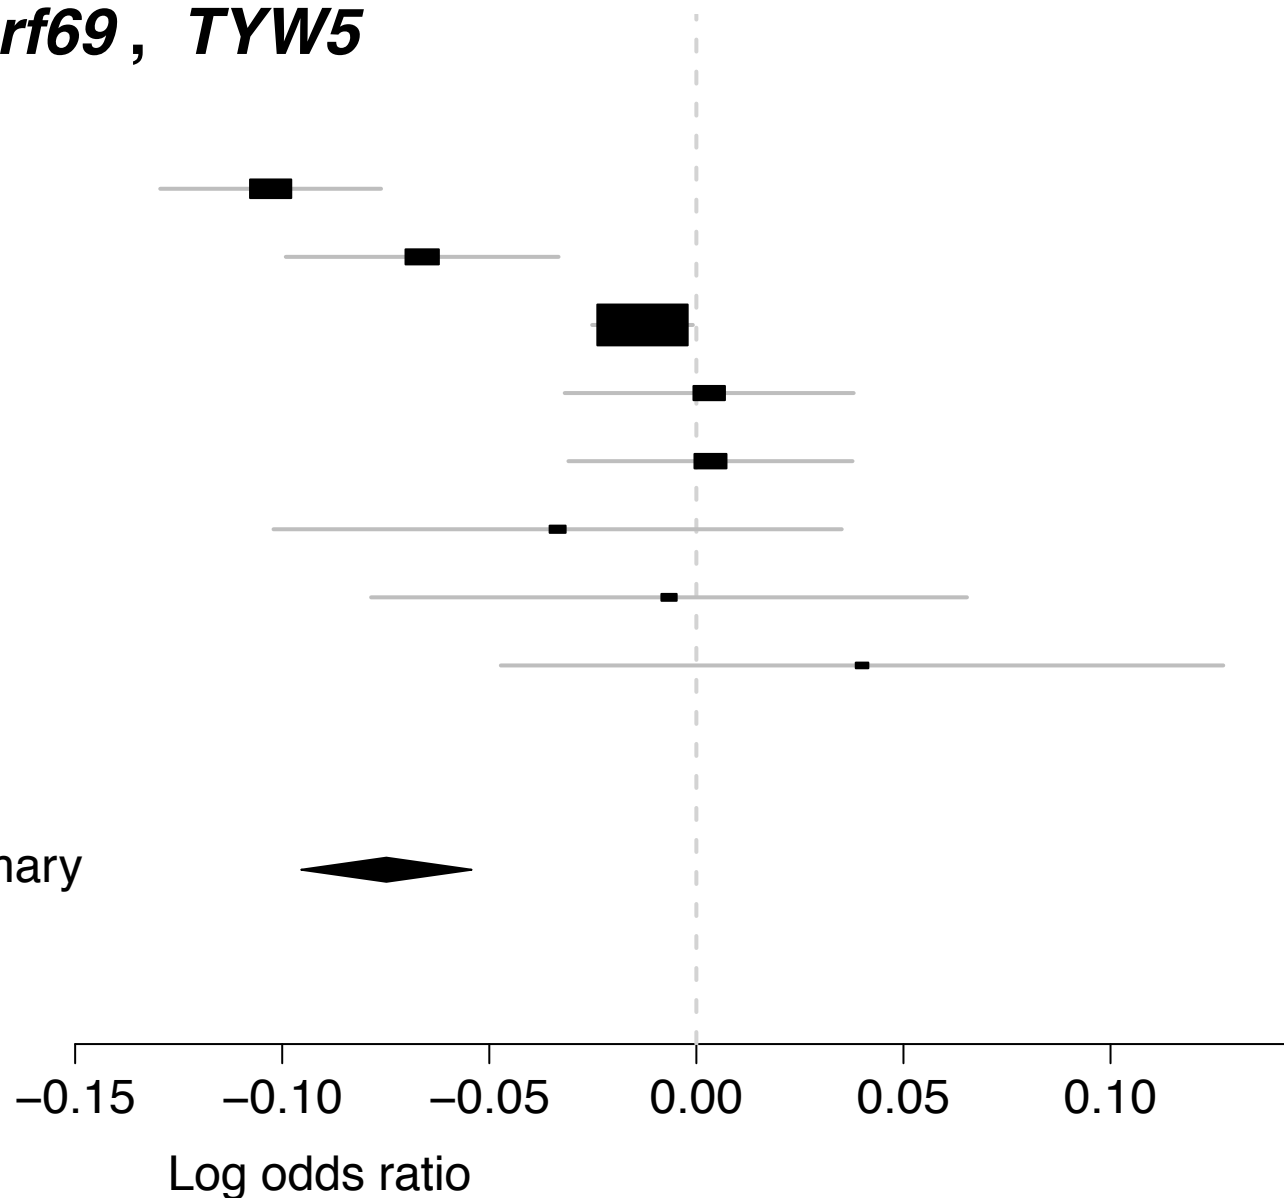

PM-Plot

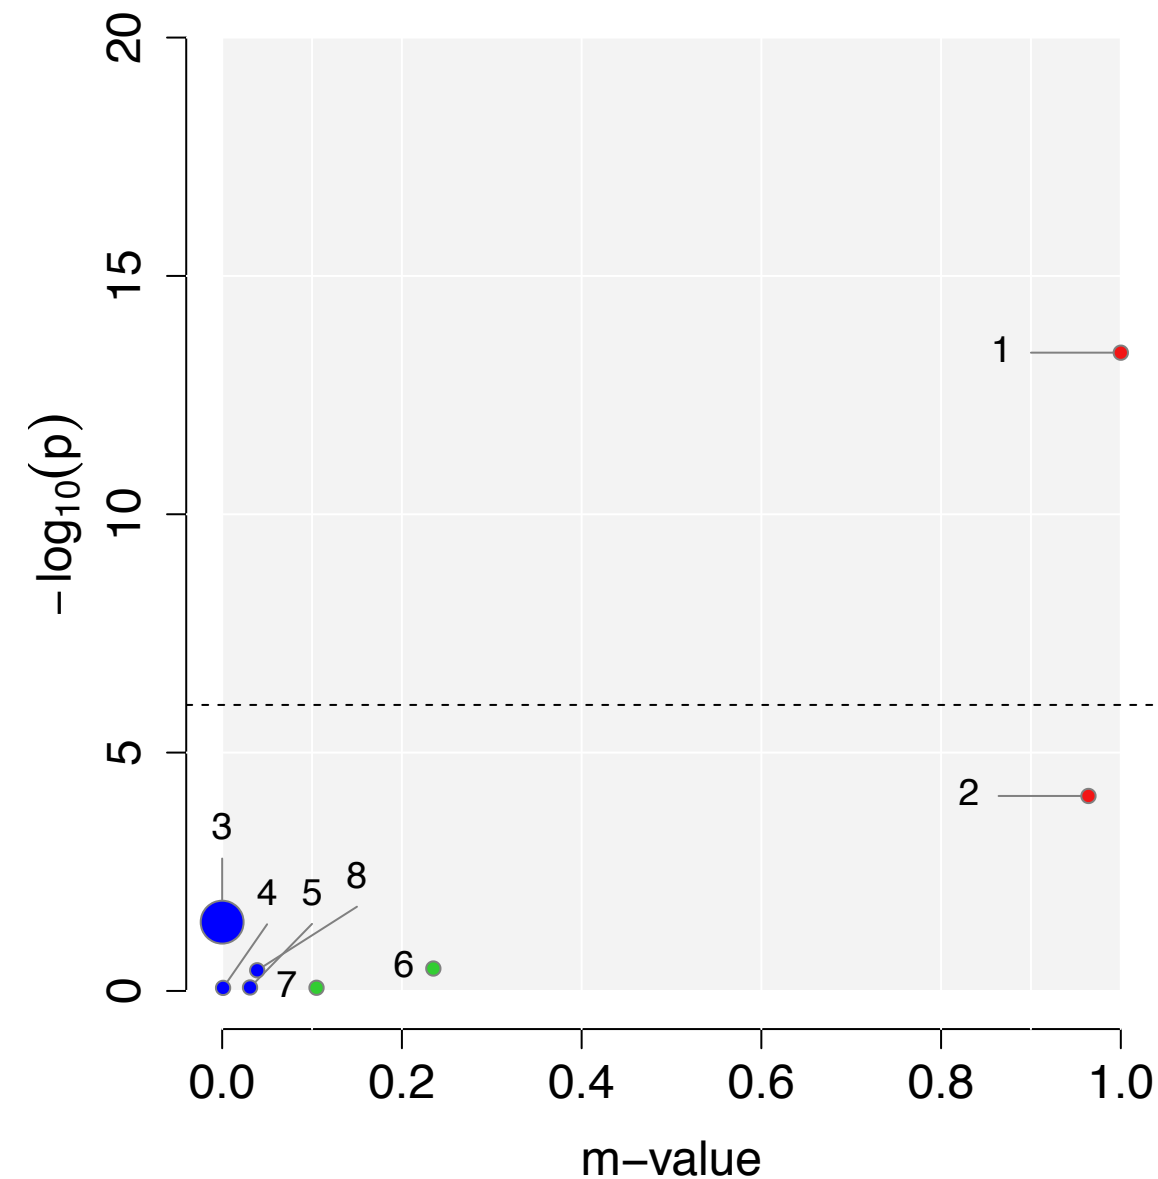

# rs11866581 (Meta $P = 2.21 \times 10^{-8}$ )

Gene : (>200kb)

## GWAS P-value

- 3.77 x 10<sup>-5</sup> ● 1.SCZ
- 0.9525 ● 2.BIP
- 1.10 x 10<sup>NA</sup> ● 3.MD
- 0.1034 ● 4.ASD
- 0.0372 ● 5.ADHD
- 0.9152 ● 6.TS
- 0.1232 ● 7.ANO
- 0.4343 ● 8.OCD

FE summary

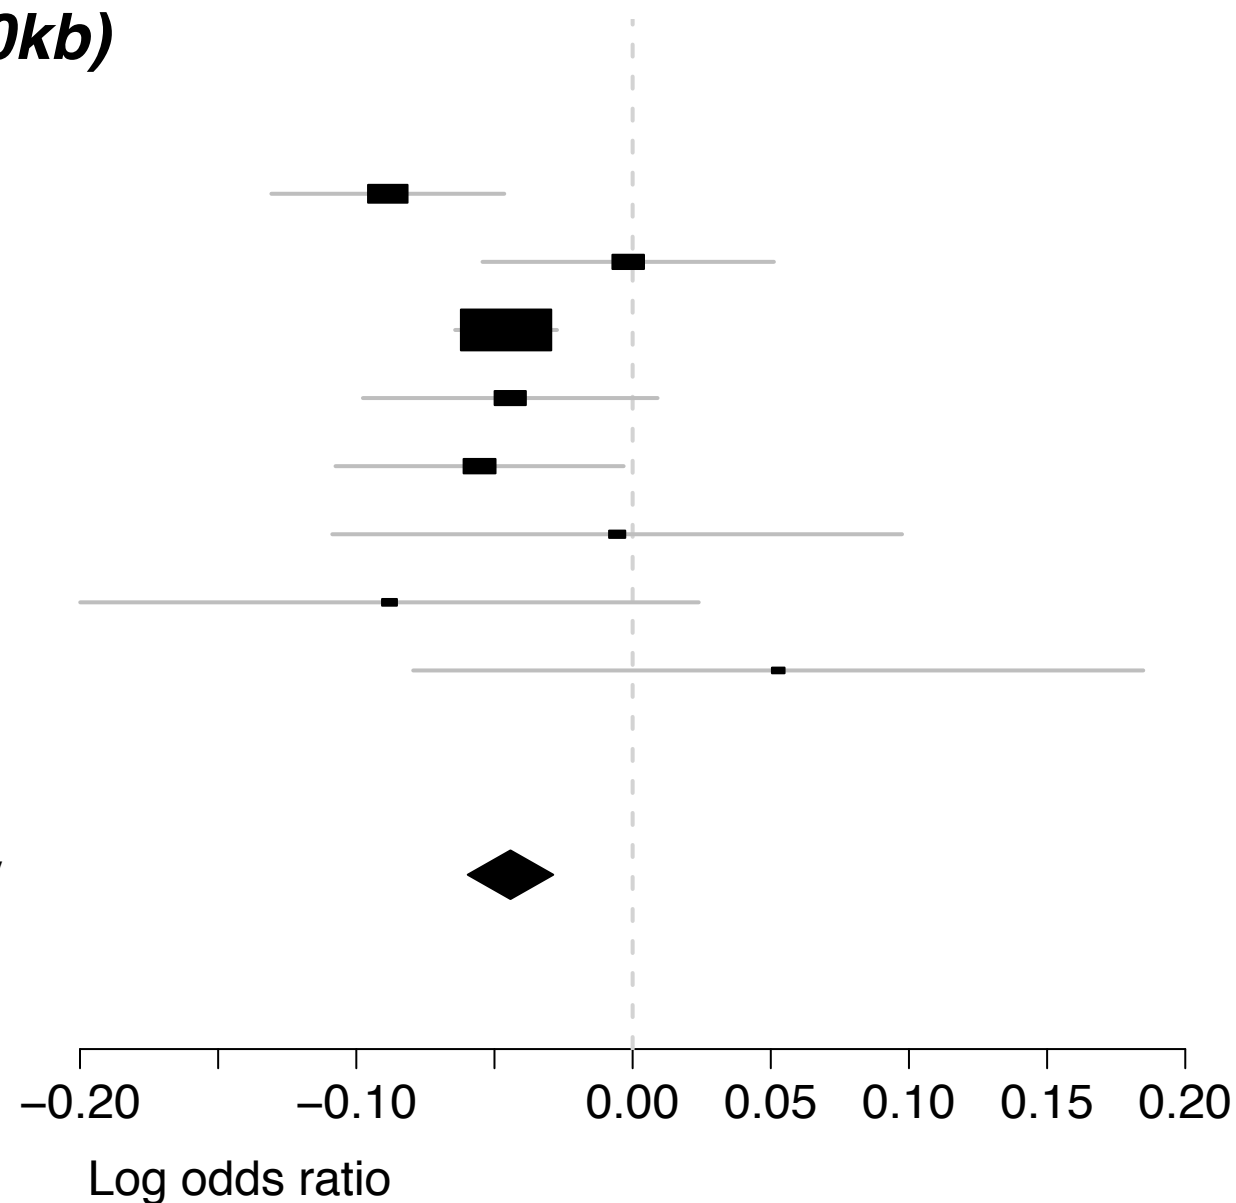

## PM-Plot

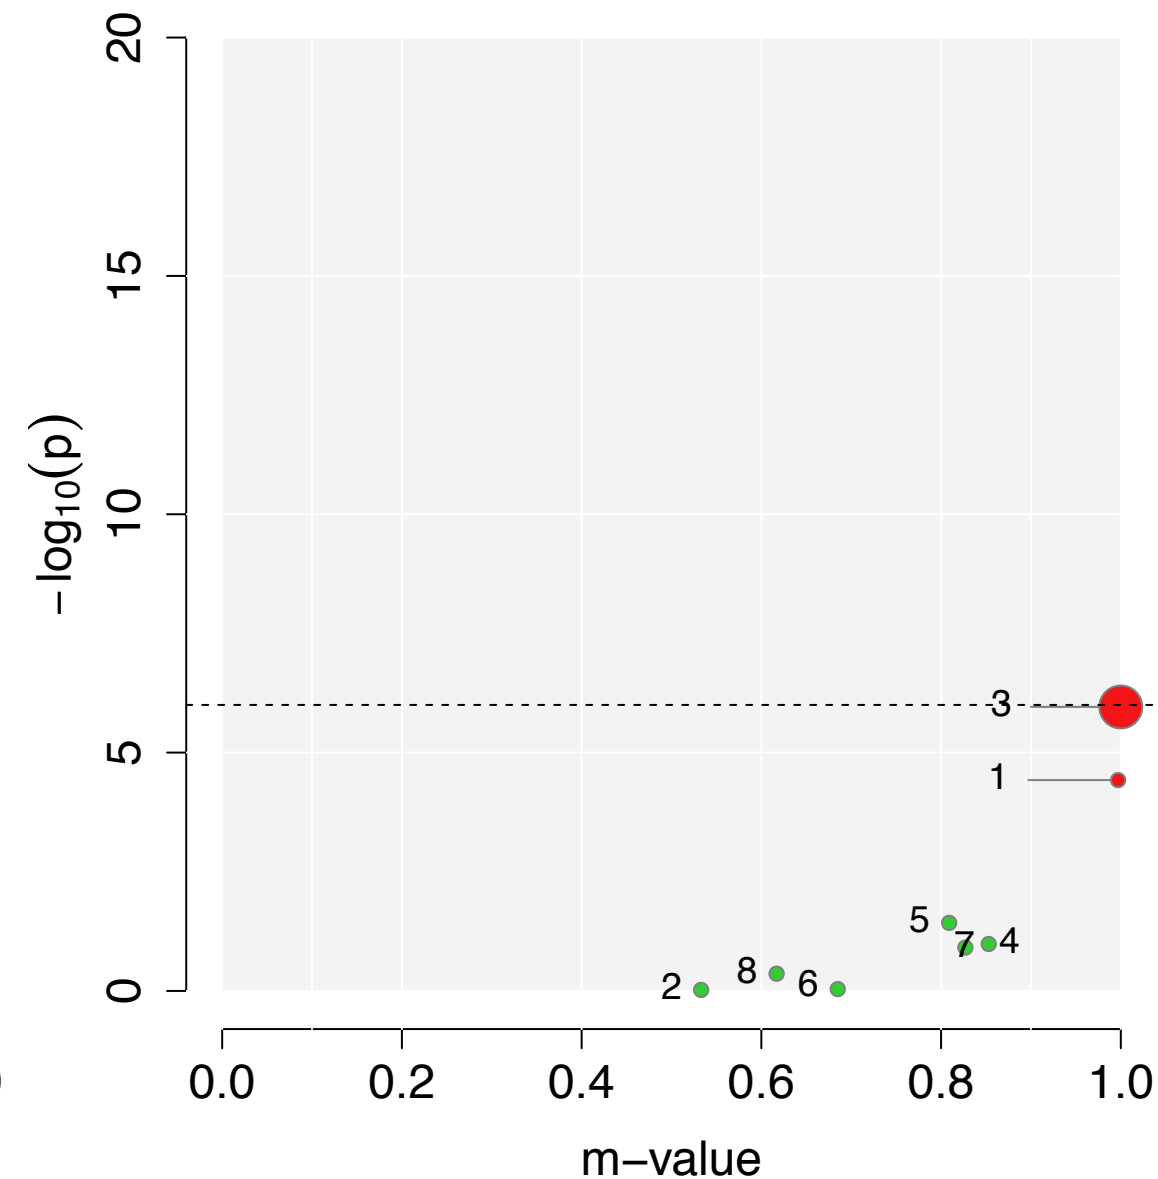



# rs11874716 (Meta $P = 8.26 \times 10^{-9}$ )

Gene : (>200kb)

## GWAS P-value

- 1.00 x 10<sup>-9</sup> ● 1.SCZ
- 0.1172 ● 2.BIP
- 7.15 x 10<sup>-6</sup> ● 3.MD
- 0.7138 ● 4.ASD
- 0.3393 ● 5.ADHD
- 0.2812 ● 6.TS
- 0.6339 ● 7.ANO
- 0.9906 ● 8.OCD

FE summary

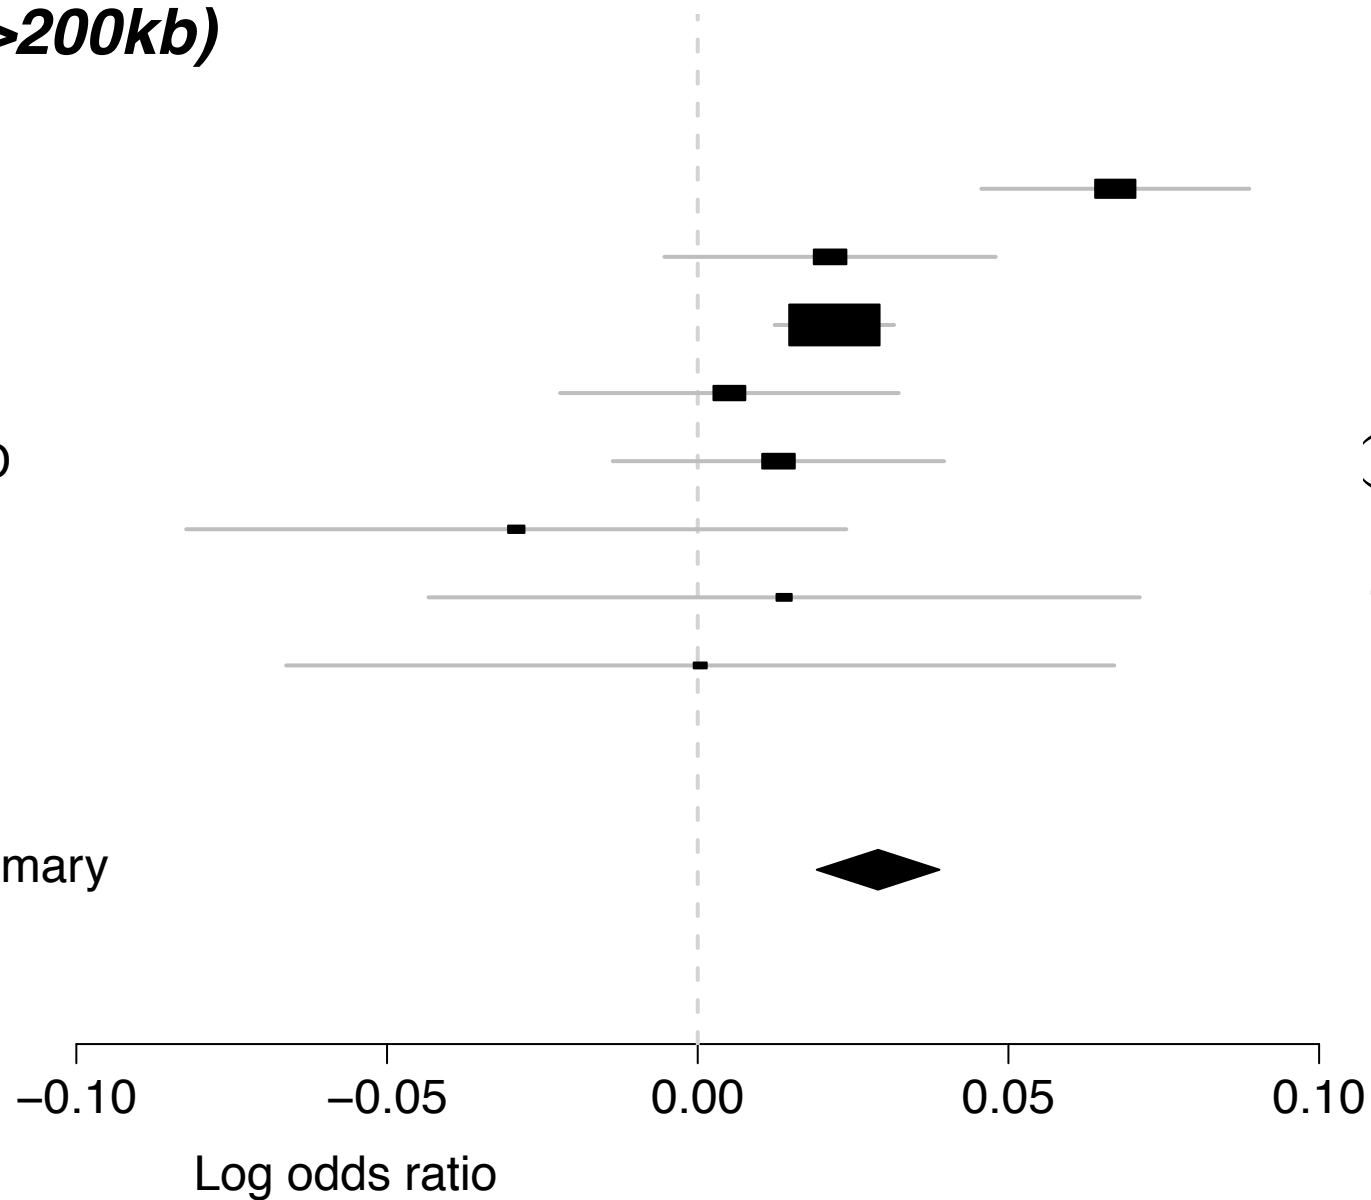

## PM-Plot

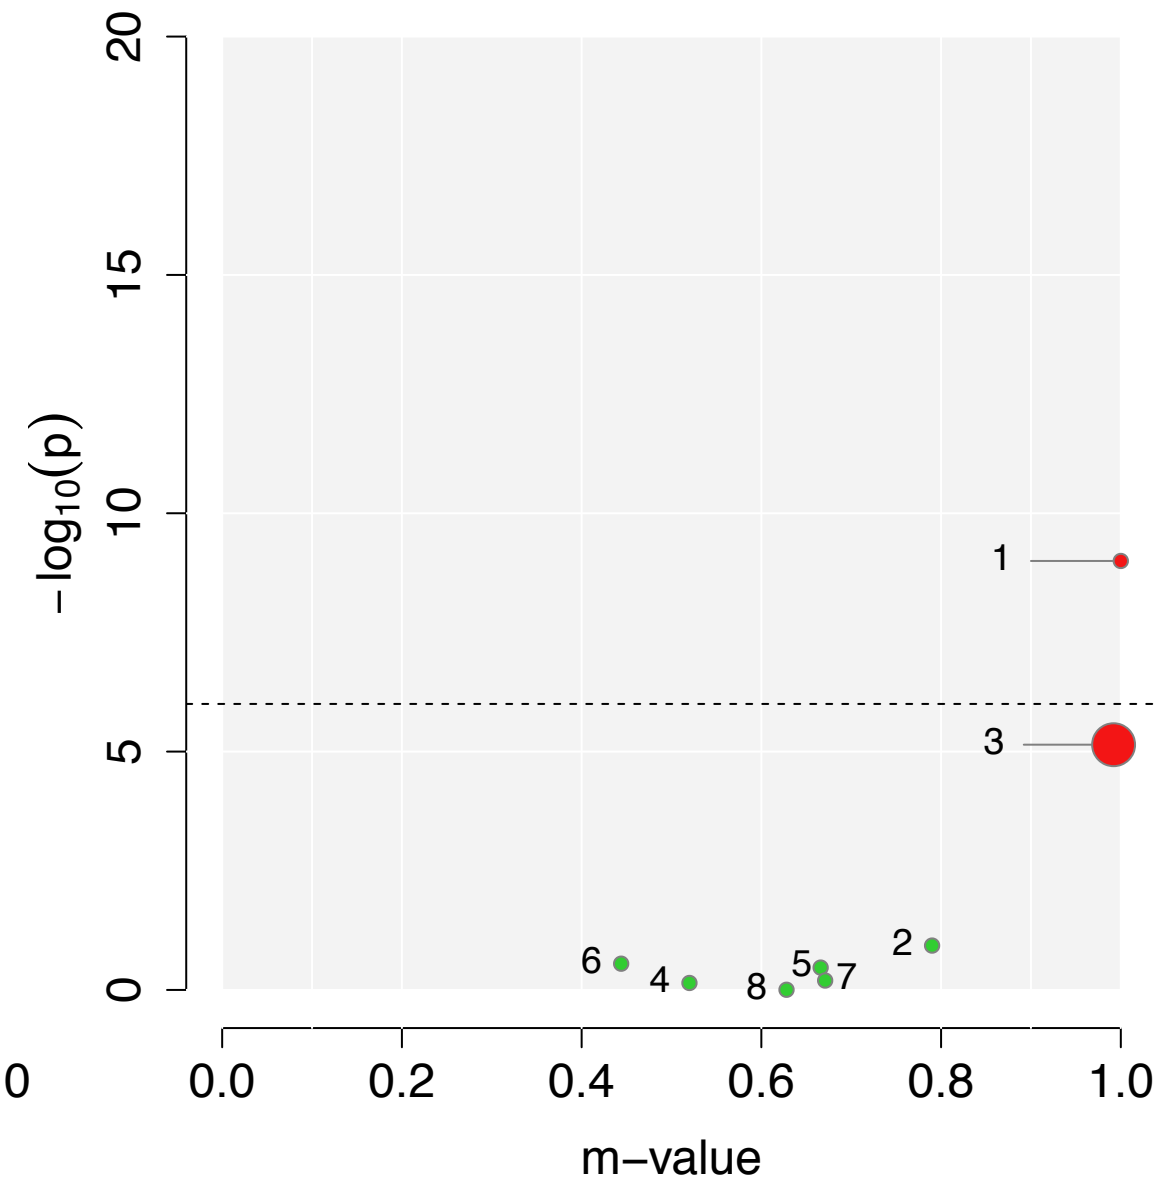

# rs11887562 (Meta $P = 2.79 \times 10^{-8}$ )

Gene : (>200kb)

## GWAS P-value

- 9.97 x 10<sup>-8</sup> ● 1.SCZ
- 6.95 x 10<sup>-5</sup> ● 2.BIP
- 0.0007 ● 3.MD
- 0.8789 ● 4.ASD
- 0.9013 ● 5.ADHD
- 0.8583 ● 6.TS
- 0.4416 ● 7.ANO
- 0.1034 ● 8.OCD

FE summary

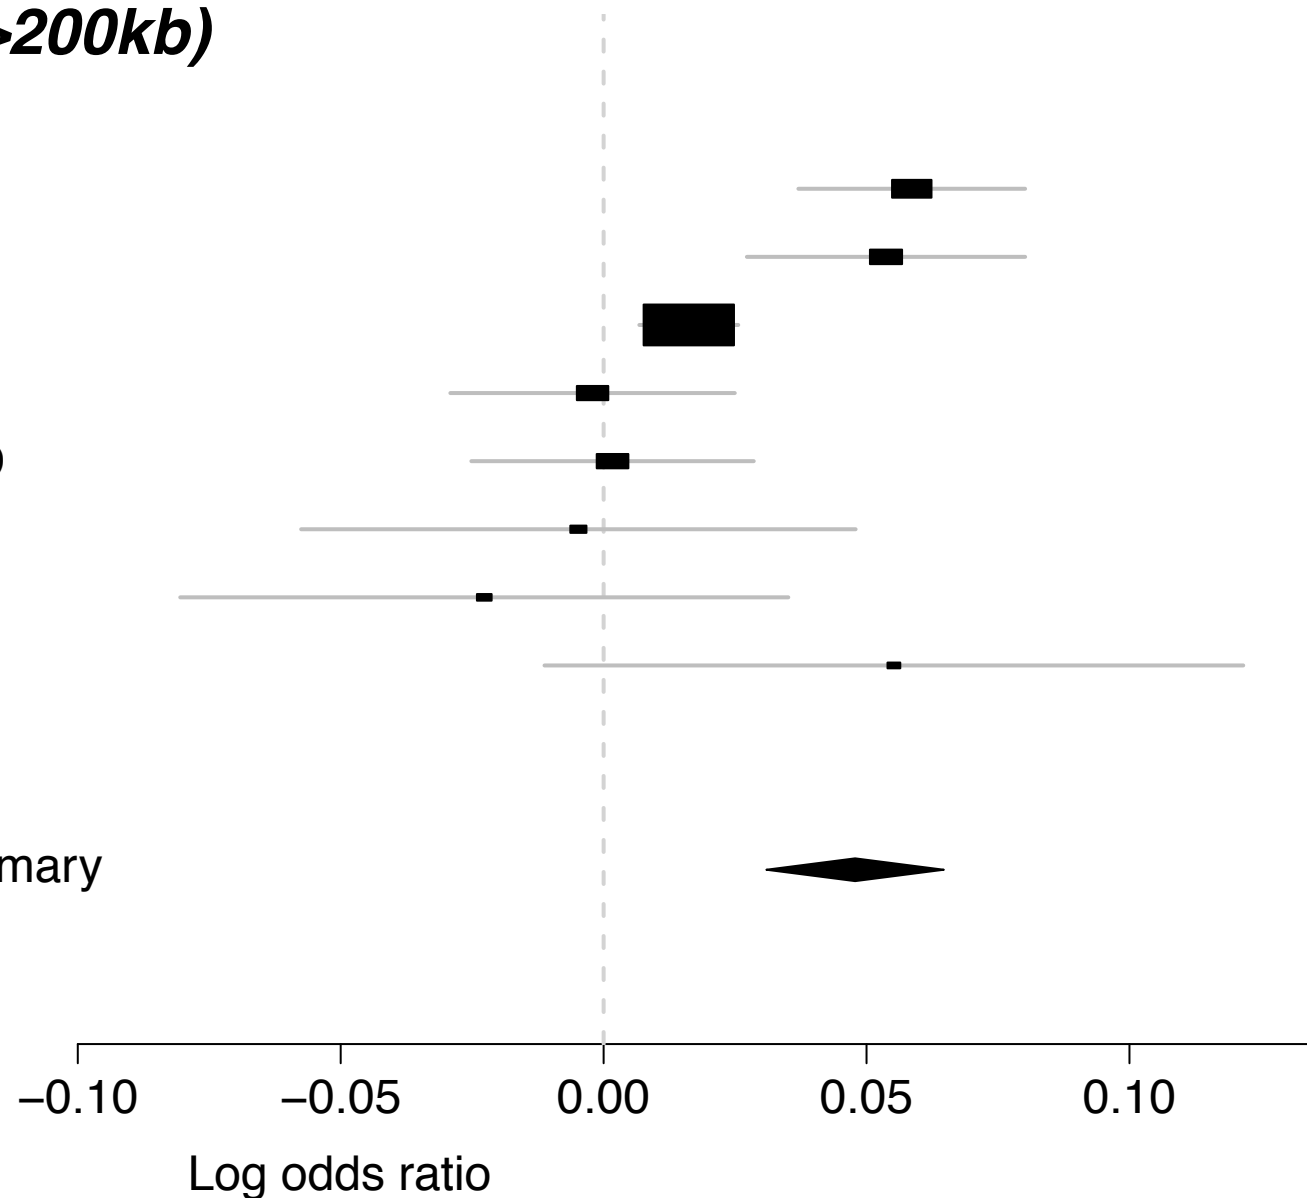

## PM-Plot

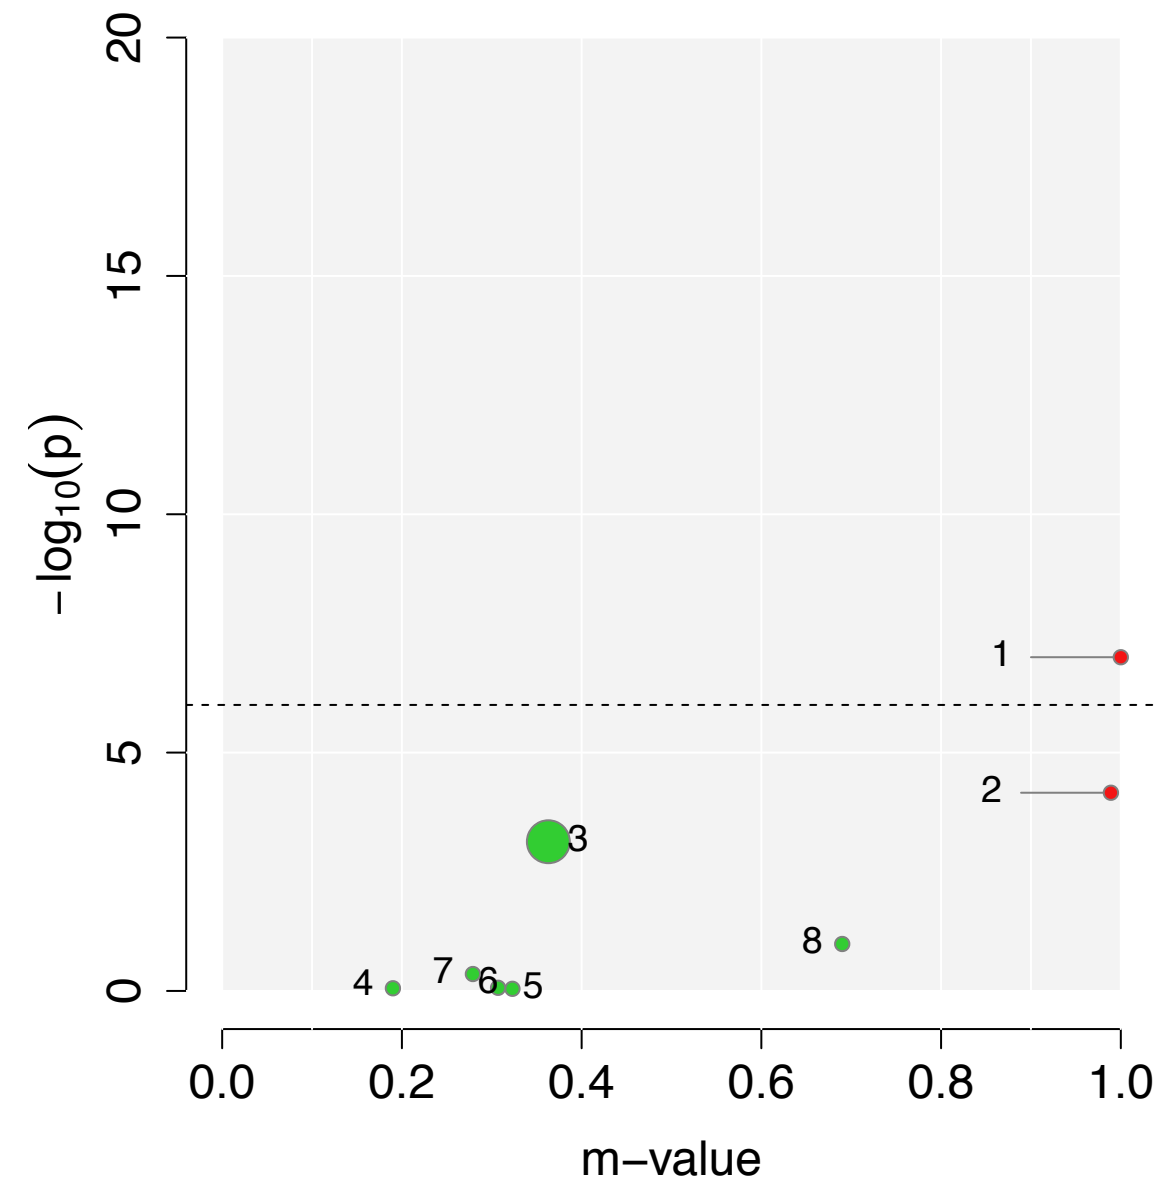

# rs12129573 (Meta $P = 5.2e \times 10^{-17}$ )

Gene : (>200kb)

## GWAS P-value

- 9.05 x 10<sup>-10</sup> ● 1.SCZ
- 0.0233 ● 2.BIP
- 5.21 x 10<sup>-12</sup> ● 3.MD
- 0.0723 ● 4.ASD
- 0.0010 ● 5.ADHD
- 0.4873 ● 6.TS
- 0.3424 ● 7.ANO
- 0.3022 ● 8.OCD

FE summary

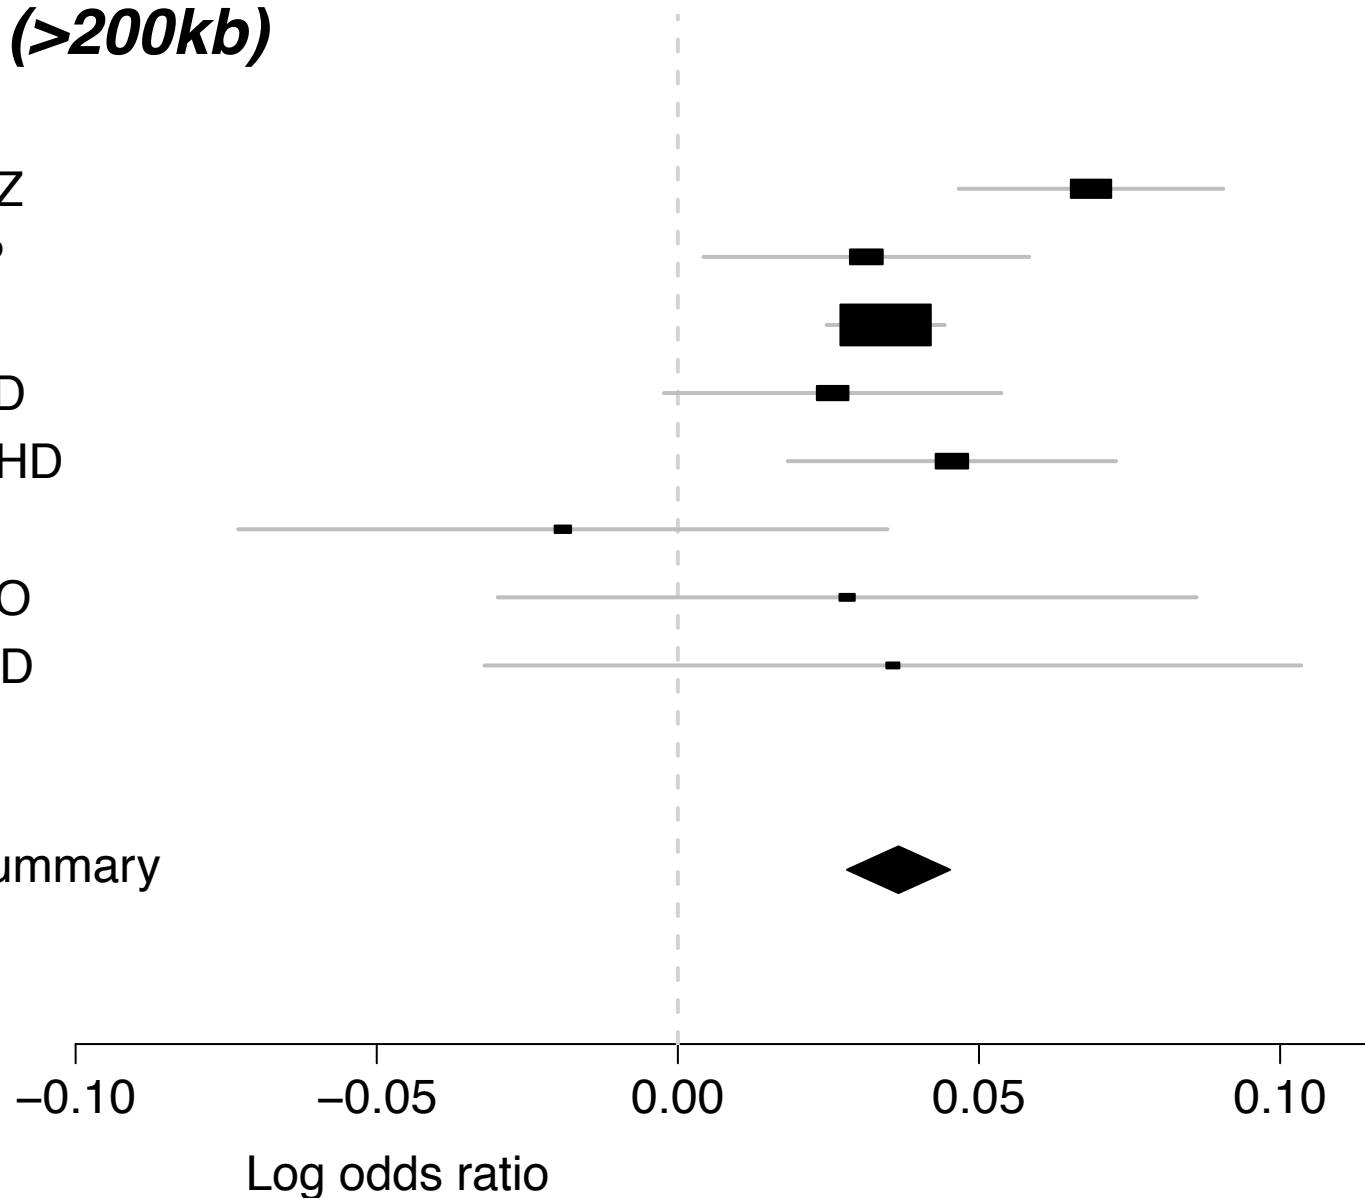

## PM-Plot

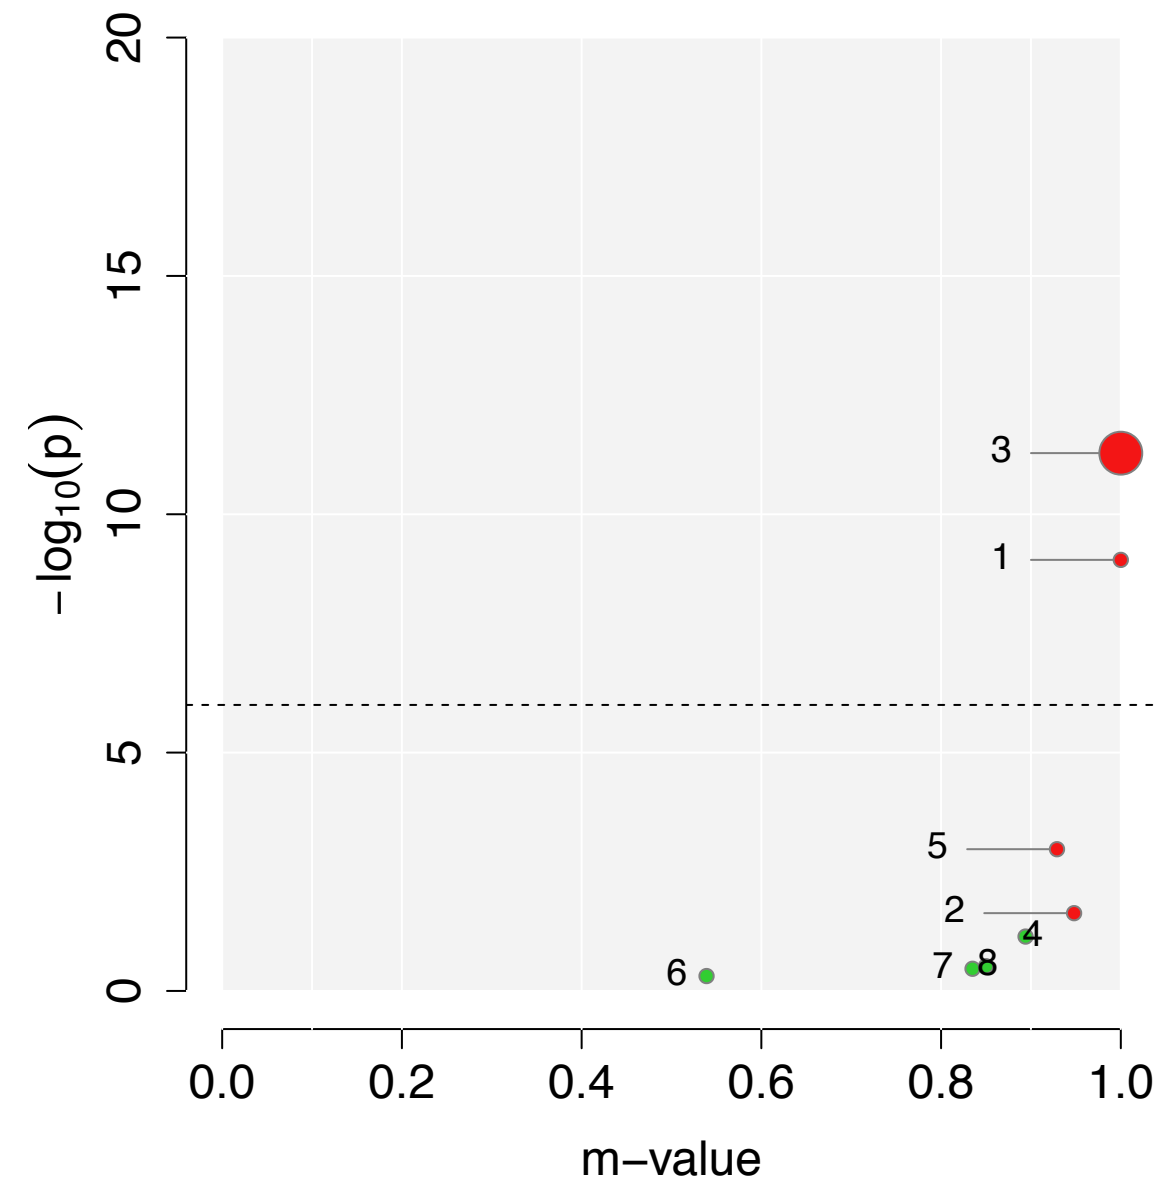

# rs12474906 (Meta $P = 8.05 \times 10^{-9}$ )

Gene : *RBKS*, *MRPL33*

## GWAS P-value

- 5.60 x 10<sup>-8</sup> ● 1.SCZ
- 9.85 x 10<sup>-5</sup> ● 2.BIP
- 0.0036 ● 3.MD
- 0.7347 ● 4.ASD
- 0.6315 ● 5.ADHD
- 0.7065 ● 6.TS
- 0.8131 ● 7.ANO
- 0.0202 ● 8.OCD

FE summary

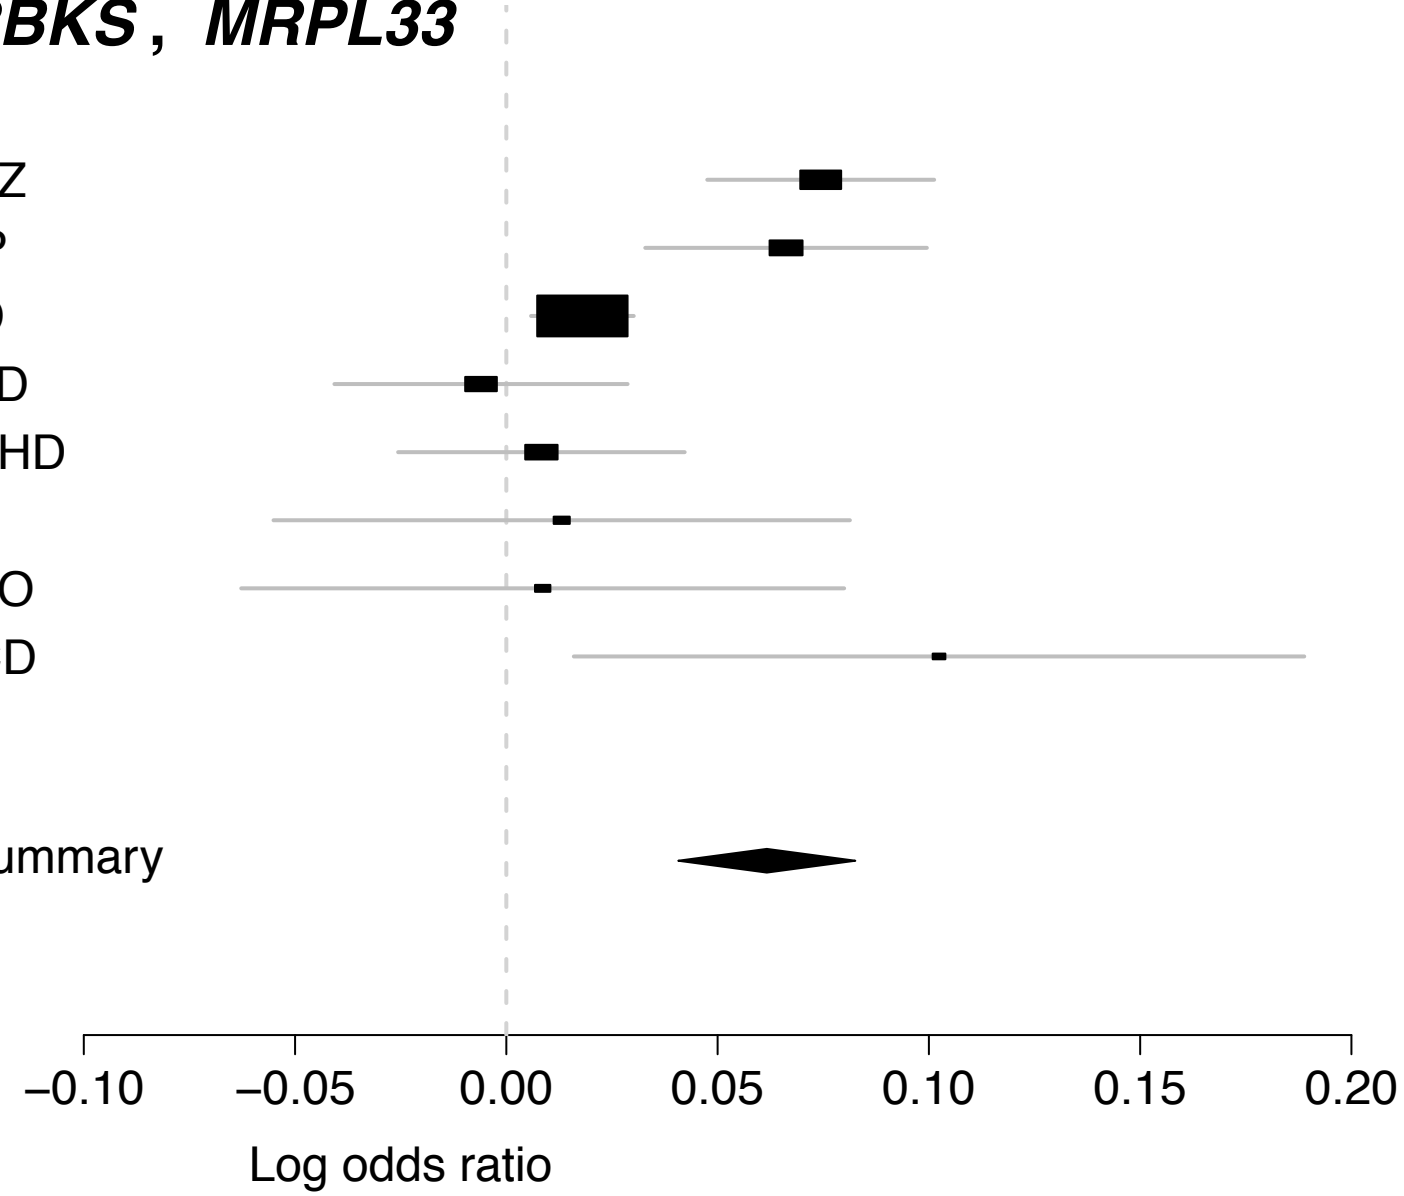

## PM-Plot

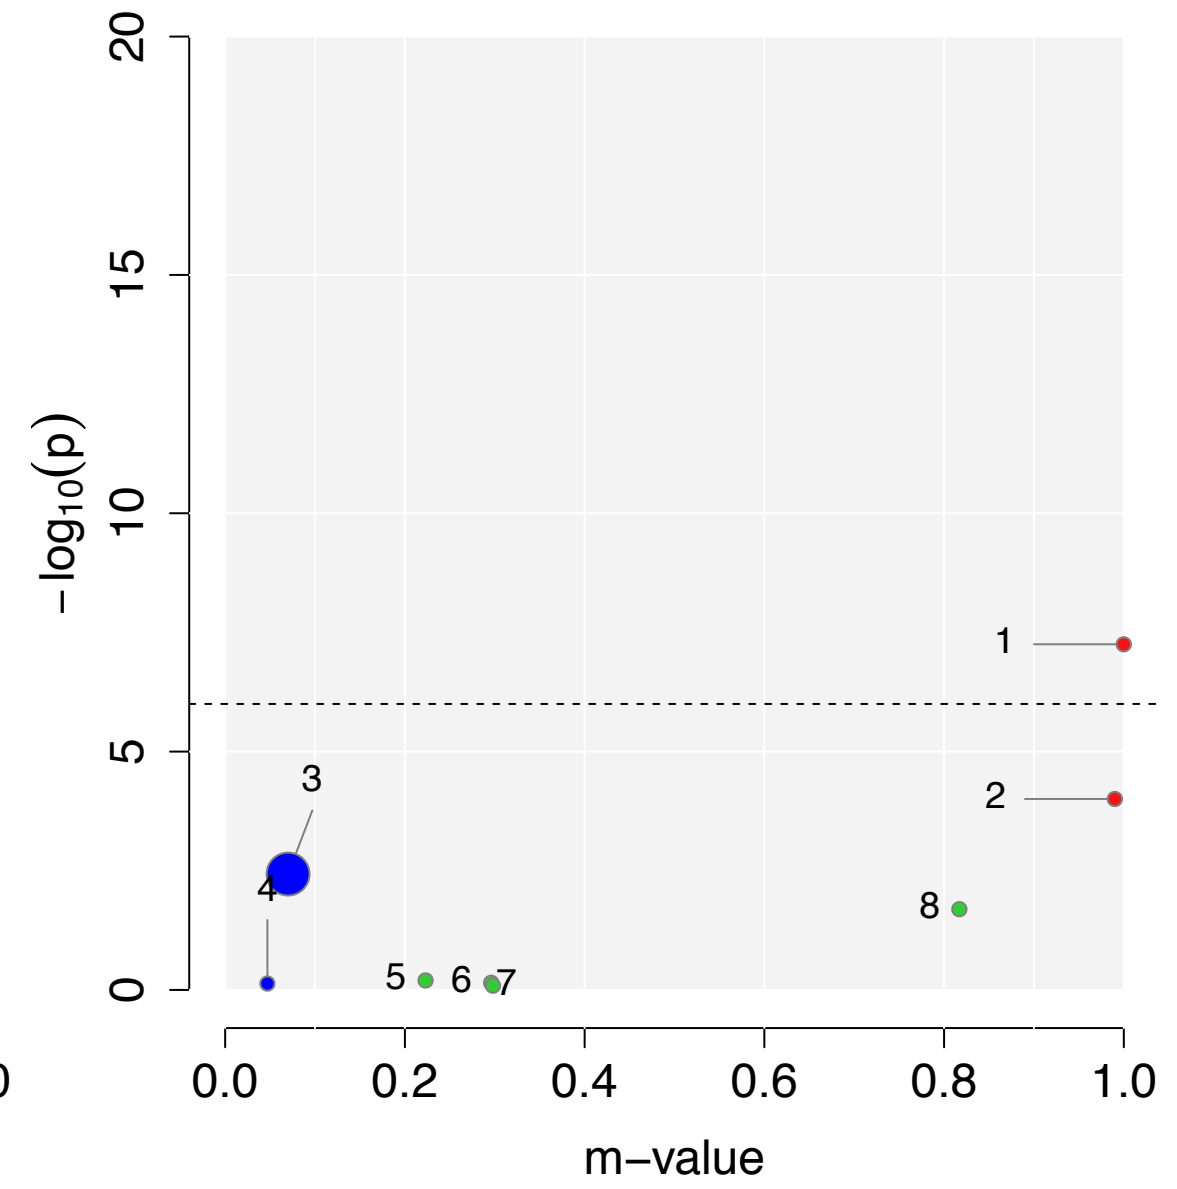

# rs12658451 (Meta $P = 1.55 \times 10^{-16}$ )

Gene : (>200kb)

## GWAS P-value

- 2.56 x 10<sup>-5</sup> ● 1.SCZ
- 0.0069 ● 2.BIP
- 1.69 x 10<sup>0</sup> ● 3.MD
- 1.30 x 10<sup>-5</sup> ● 4.ASD
- 7.16 x 10<sup>-6</sup> ● 5.ADHD
- 0.0055 ● 6.TS
- 0.0011 ● 7.ANO
- 0.5018 ● 8.OCD

FE summary

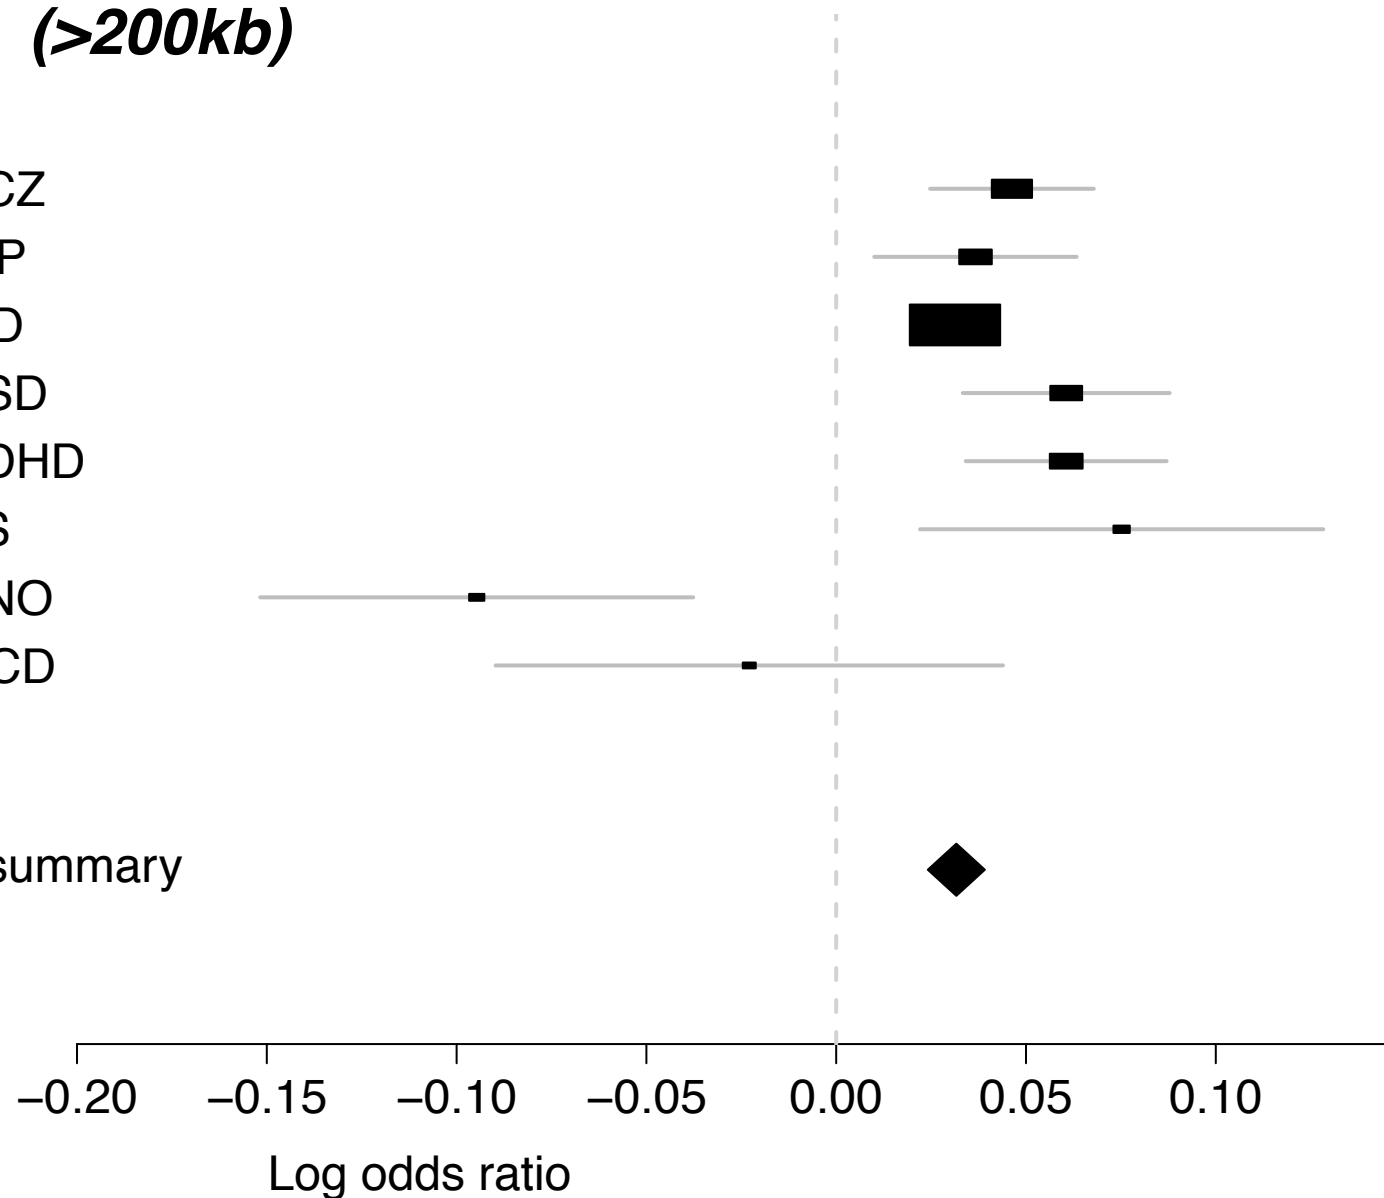

## PM-Plot

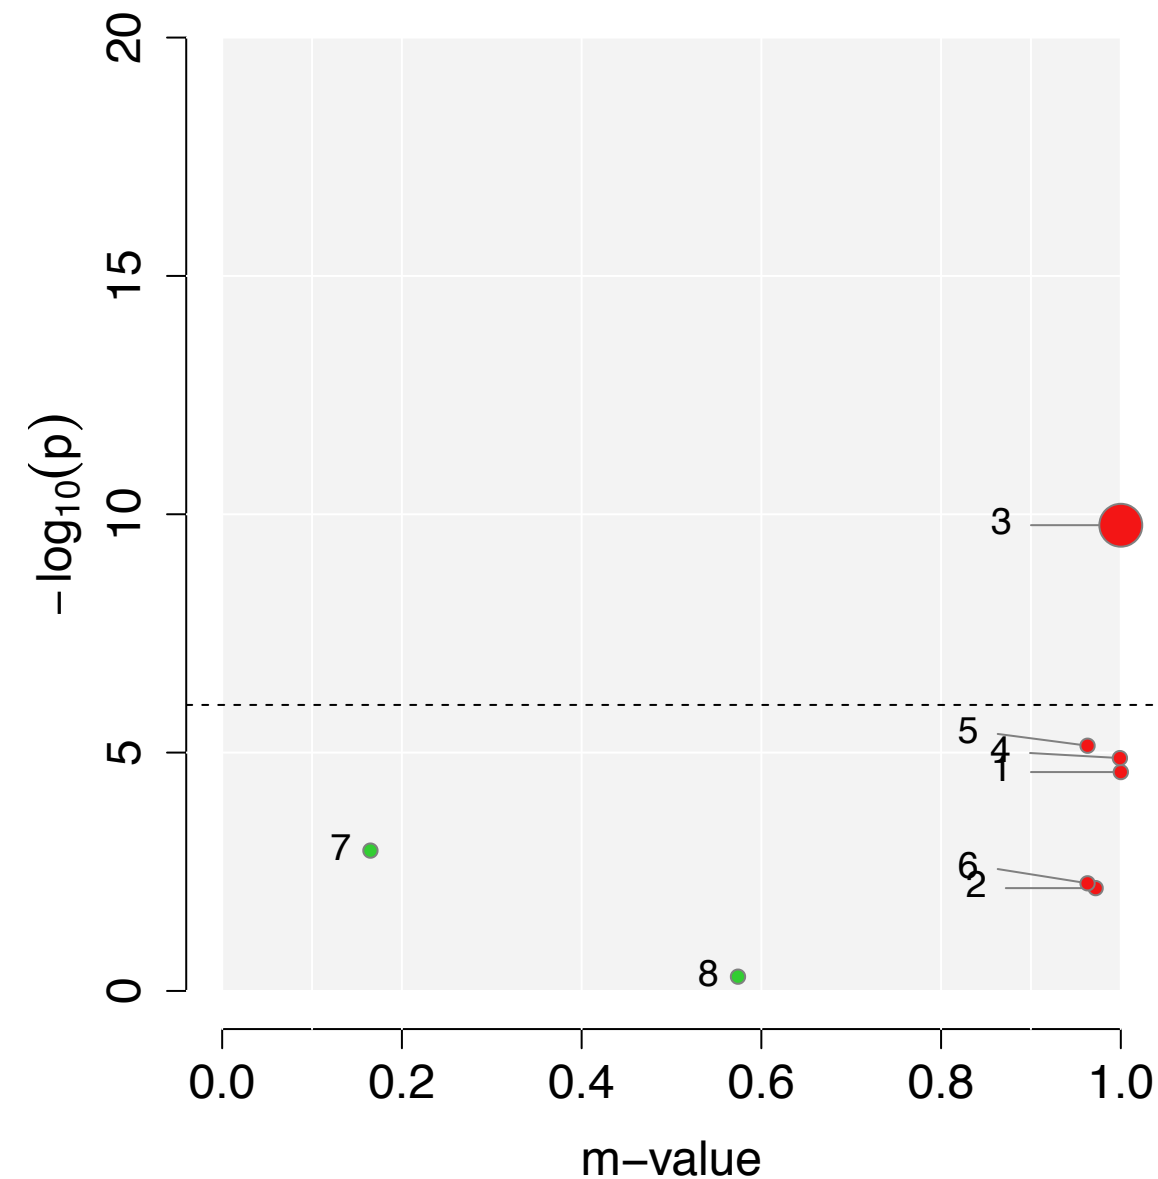

# rs12668848 (Meta $P = 1.15 \times 10^{-13}$ )

Gene : *MAD1L1*

## GWAS P-value

- 1.39 x 10<sup>-13</sup> ● 1.SCZ
- 3.13 x 10<sup>-6</sup> ● 2.BIP
- 0.0107 ● 3.MD
- 0.8637 ● 4.ASD
- 0.9244 ● 5.ADHD
- 0.2225 ● 6.TS
- 0.3881 ● 7.ANO
- 0.7120 ● 8.OCD

FE summary

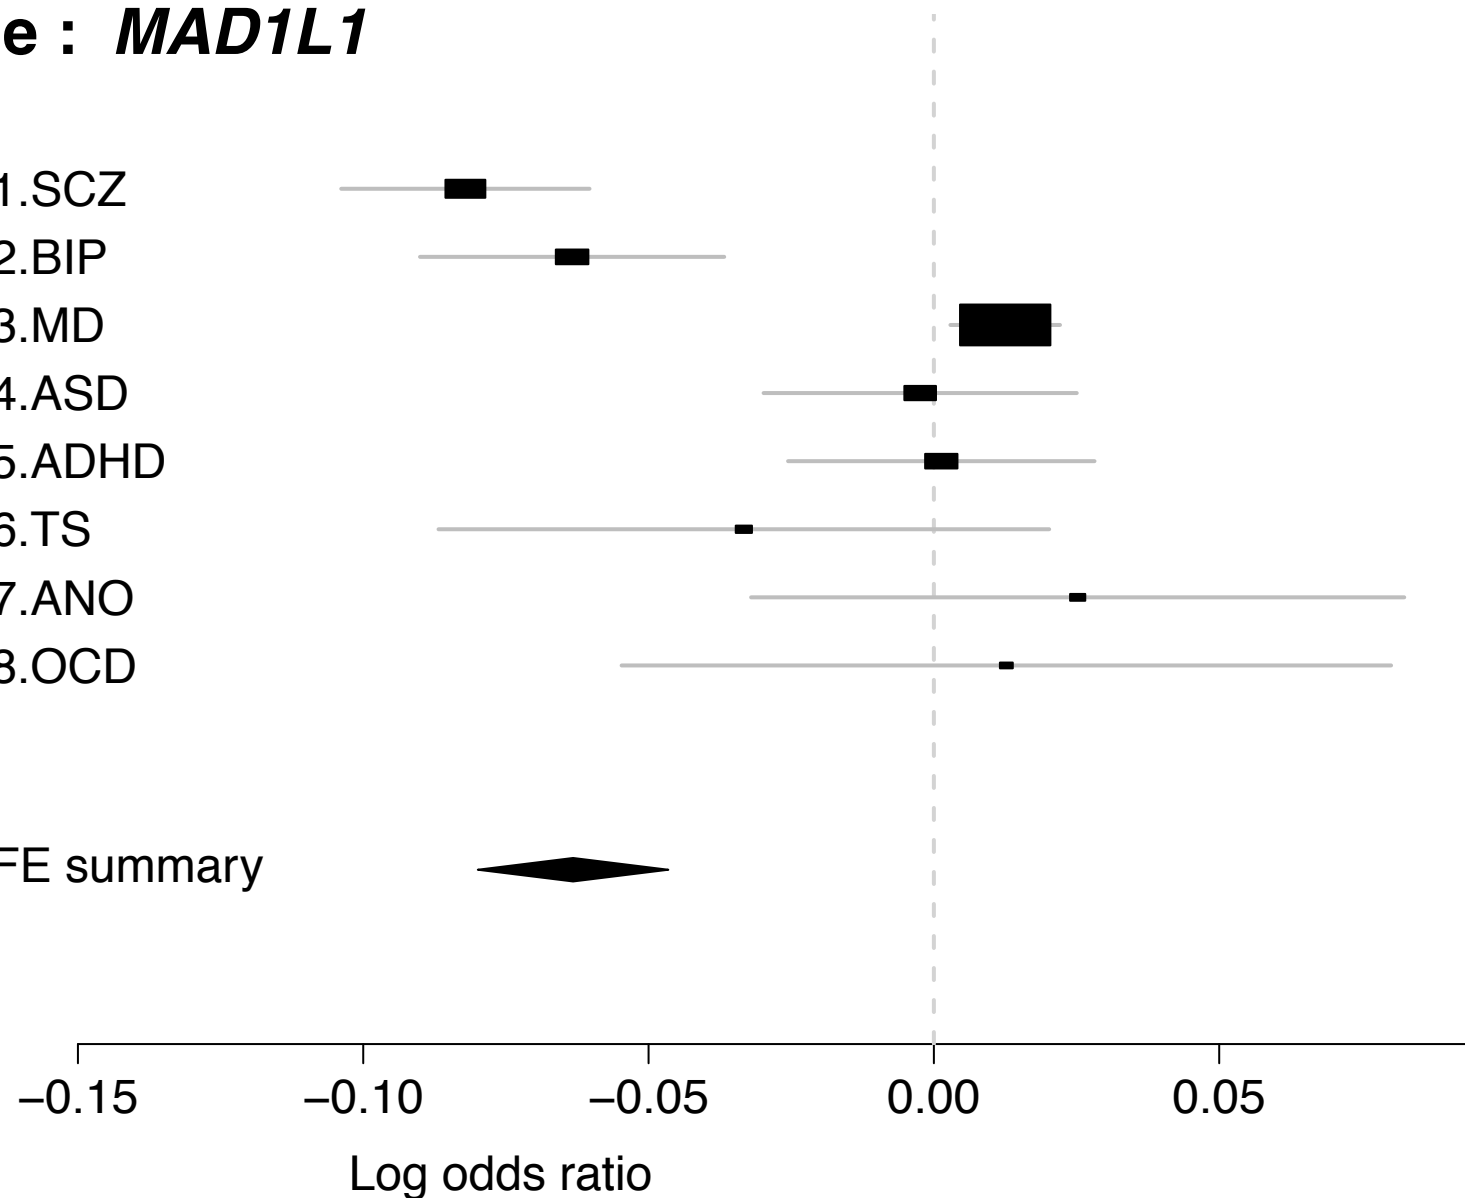

## PM-Plot

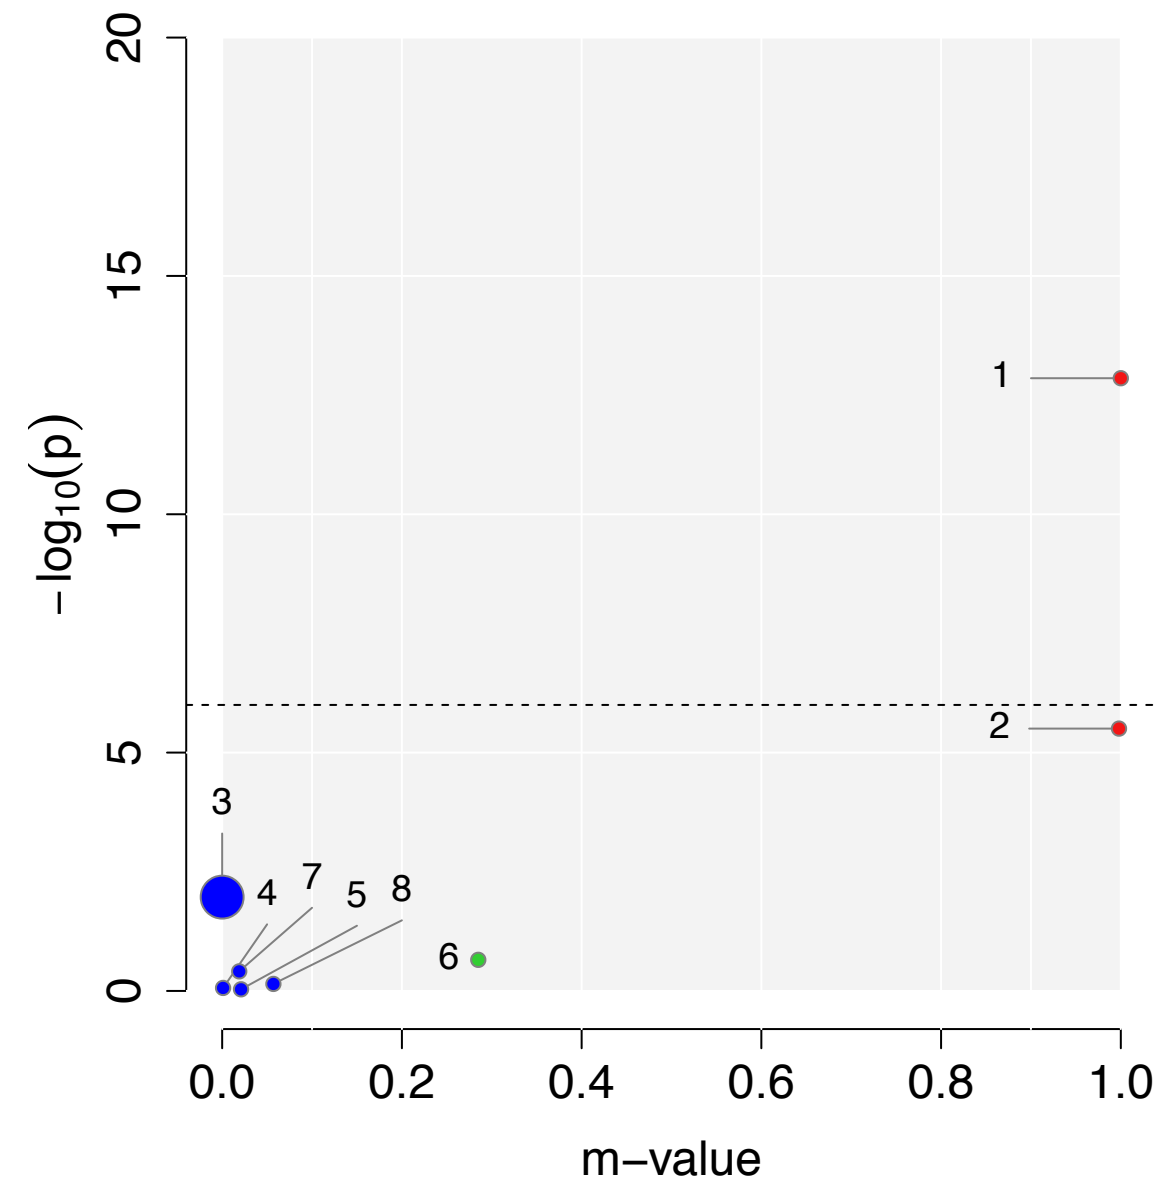

rs12704290 (Meta  $P = 2.83 \times 10^{-10}$ )

Gene : *GRM3*, *KIAA1324L*

GWAS P-value

- 2.68 x 10<sup>-10</sup> ● 1.SCZ
- 2.39 x 10<sup>-5</sup> ● 2.BIP
- 0.3171 ● 3.MD
- 0.1567 ● 4.ASD
- 0.2381 ● 5.ADHD
- 0.9785 ● 6.TS
- 0.7366 ● 7.ANO
- 0.8686 ● 8.OCD

FE summary

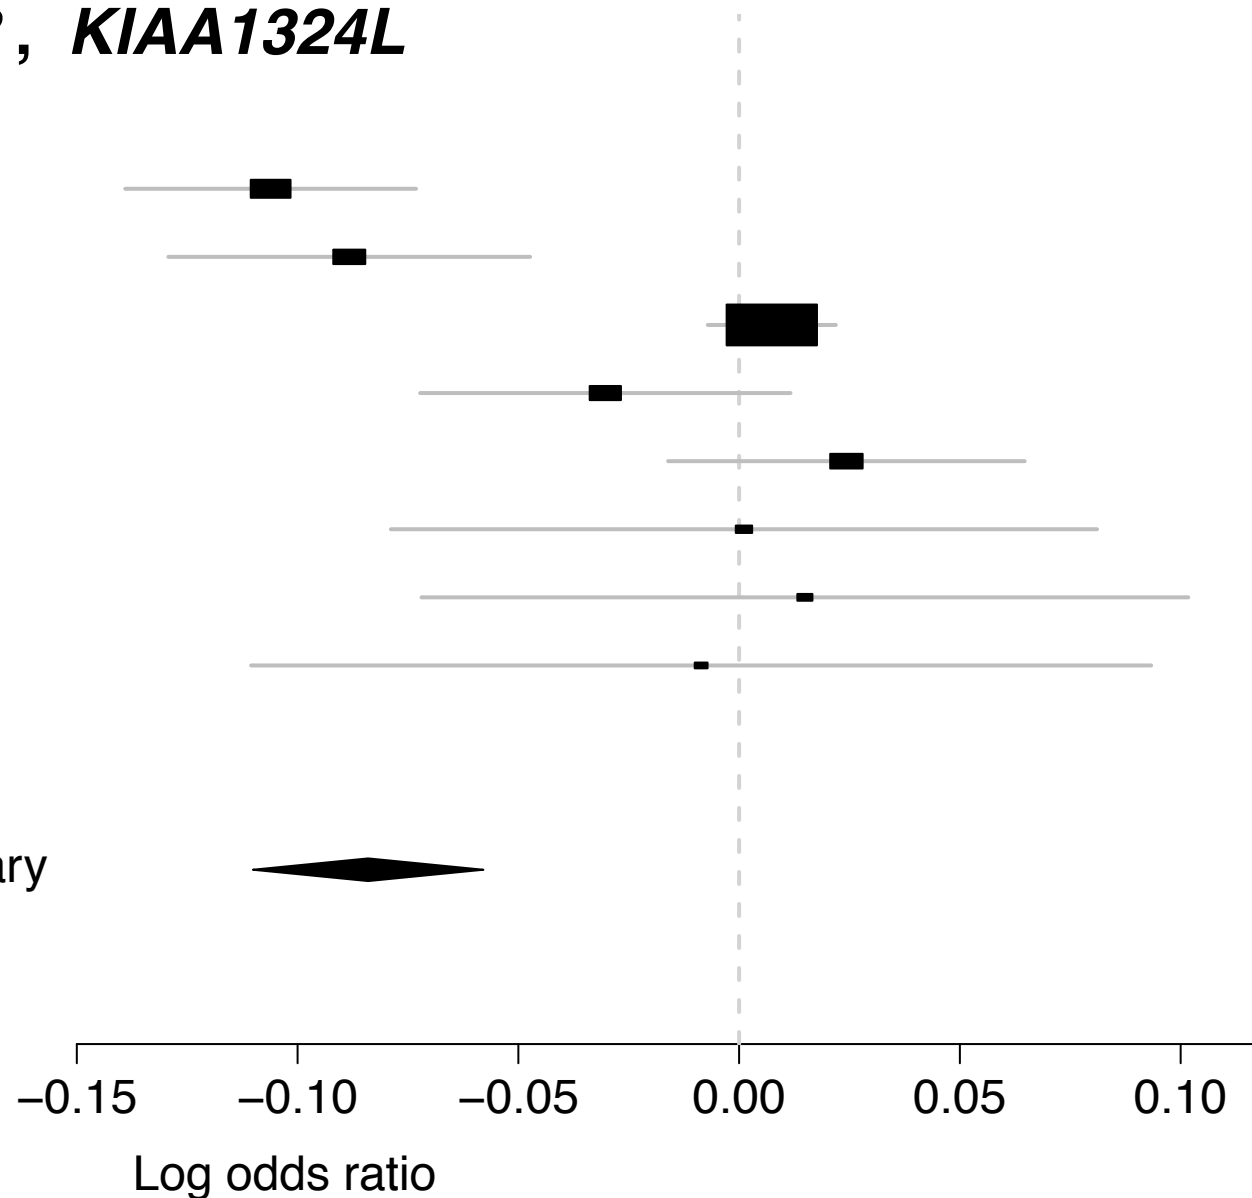

PM-Plot

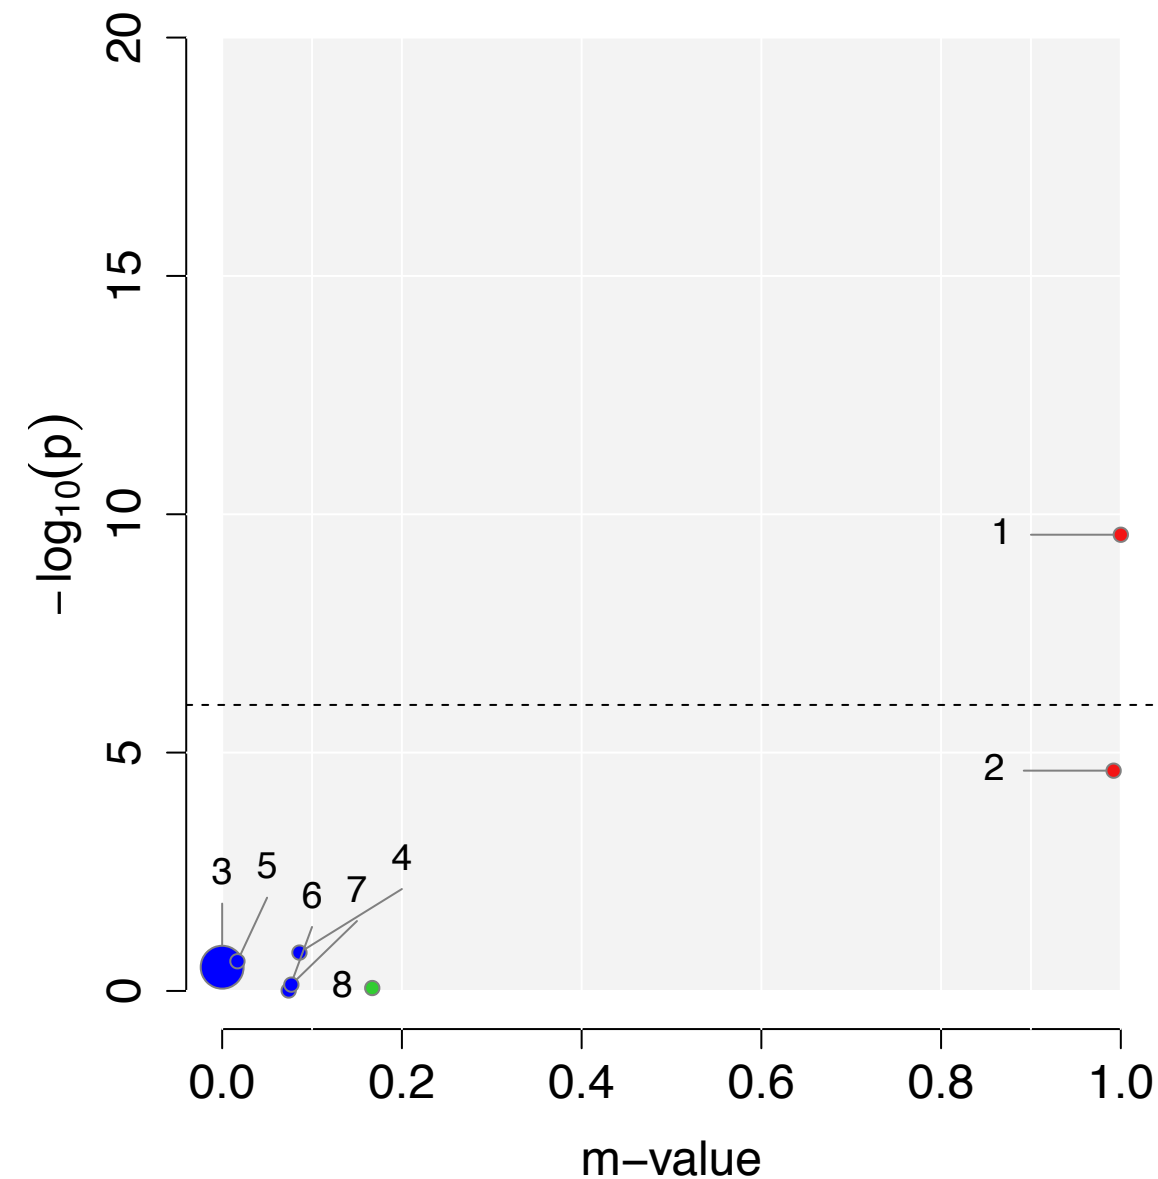

# rs12712388 (Meta $P = 1.02 \times 10^{-10}$ )

Gene : (>200kb)

## GWAS P-value

- $8.29 \times 10^{-7}$  ● 1.SCZ
- 0.0001 ● 2.BIP
- $1.32 \times 10^{-6}$  ● 3.MD
- 0.3569 ● 4.ASD
- 0.0038 ● 5.ADHD
- 0.9506 ● 6.TS
- 0.7974 ● 7.ANO
- 0.1711 ● 8.OCD

FE summary

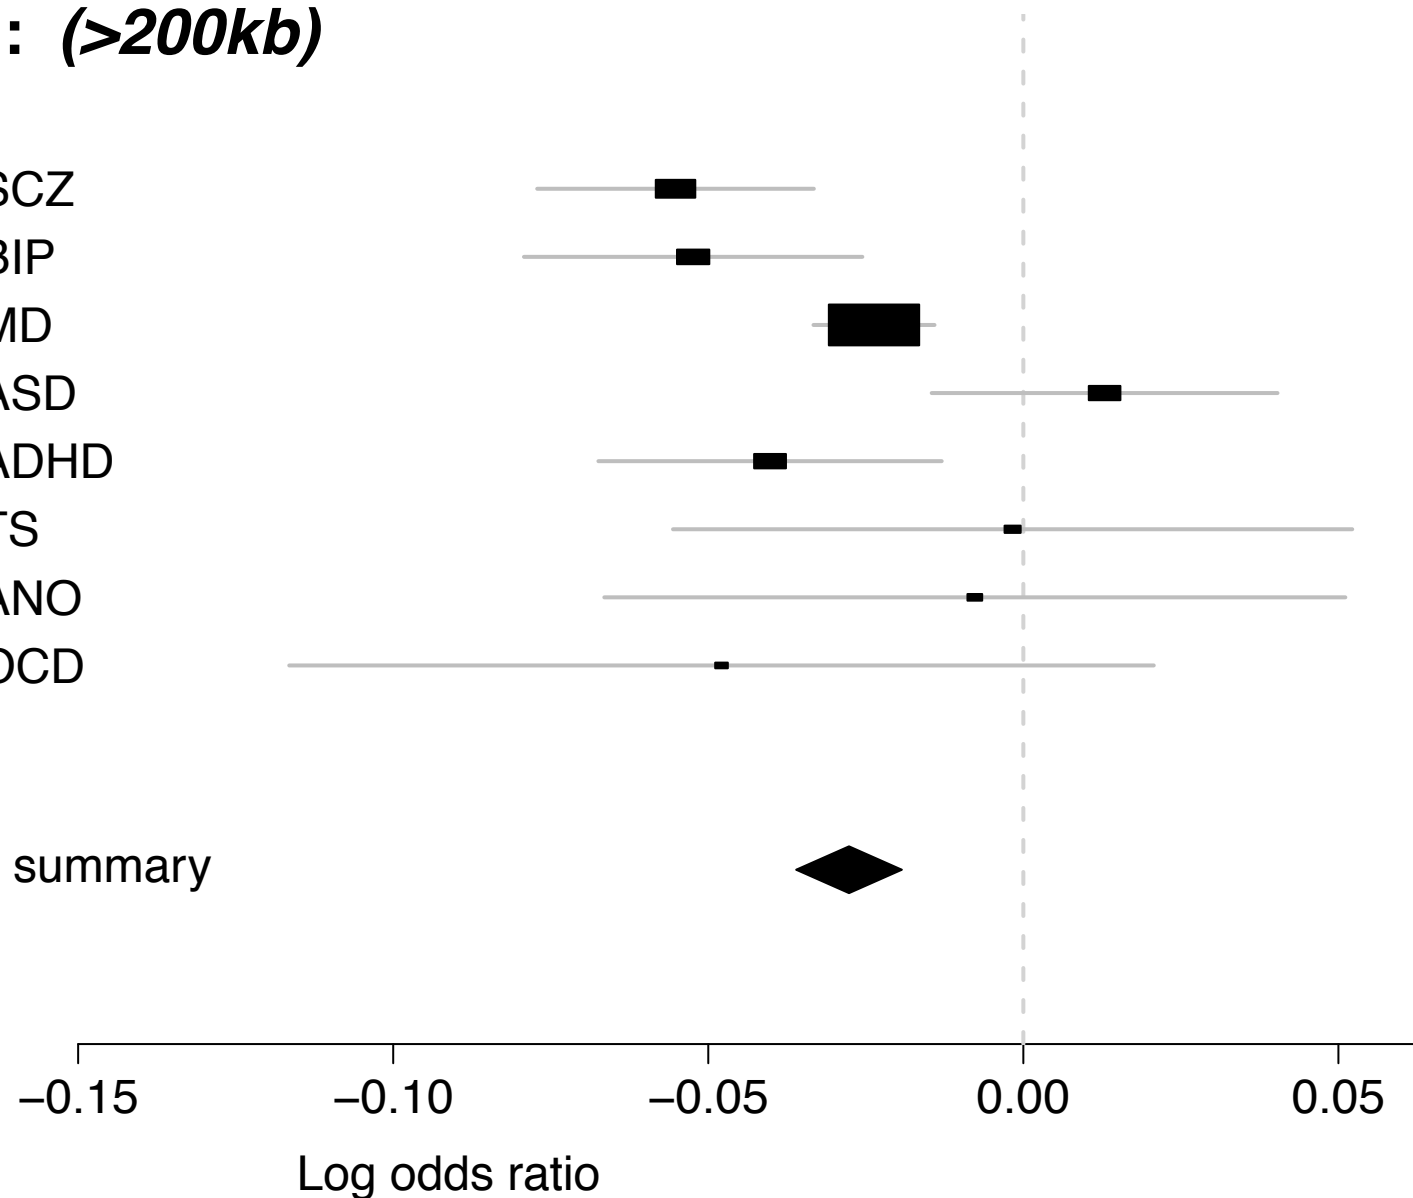

## PM-Plot

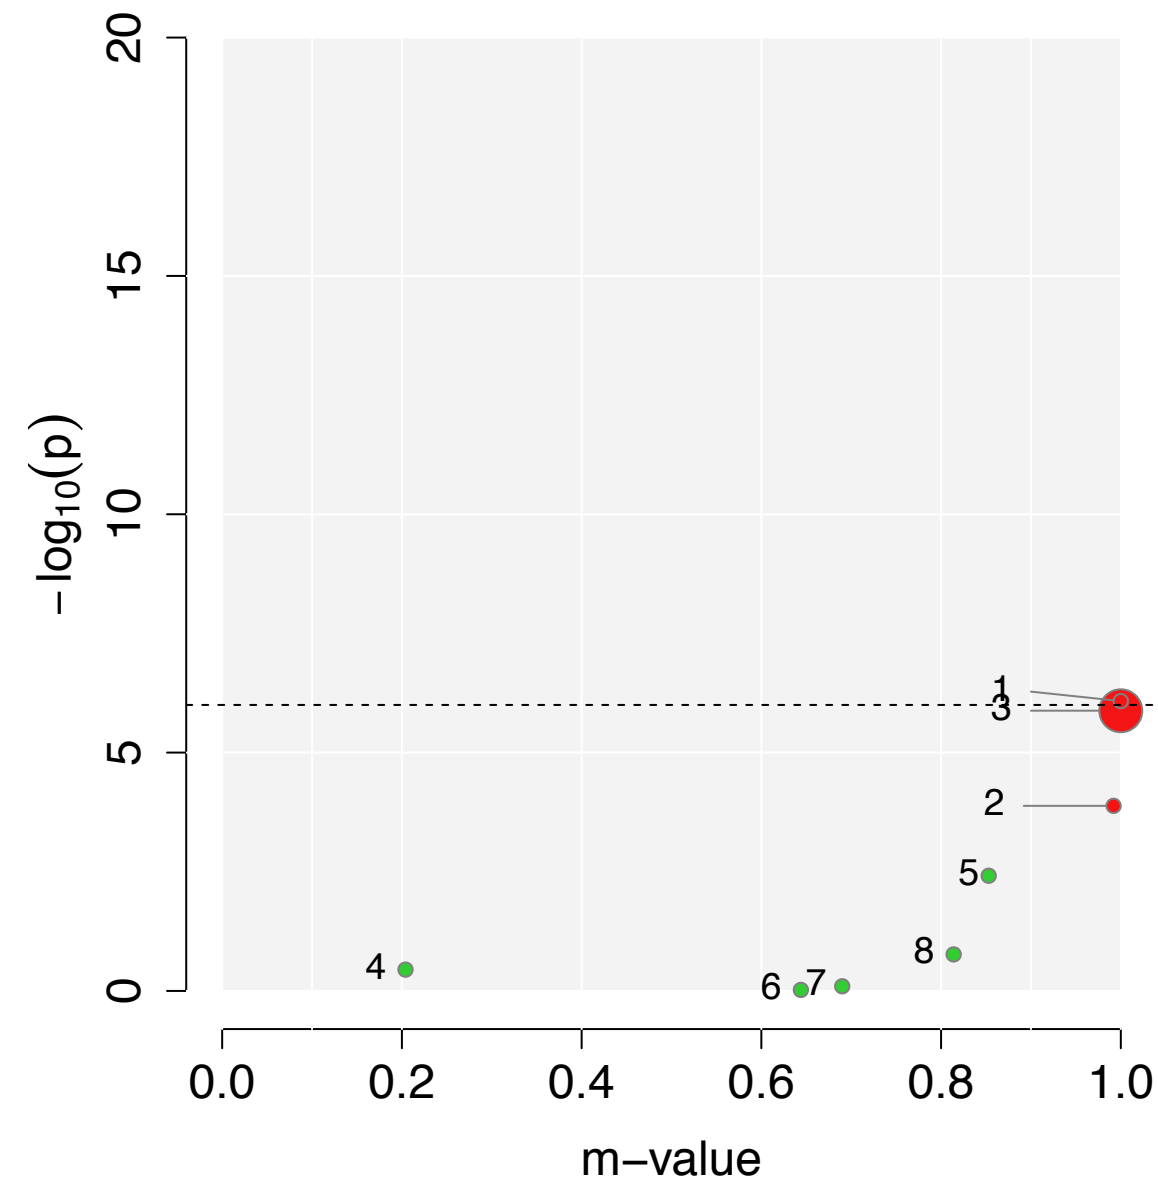



rs12826178 (Meta  $P = 6.01 \times 10^{-10}$ )

Gene : *SHMT2*, *NXPH4*

GWAS P-value

- 5.43 x 10<sup>-2</sup> ● 1.SCZ
- 0.4976 ● 2.BIP
- 0.2372 ● 3.MD
- 0.1034 ● 4.ASD
- 0.9421 ● 5.ADHD
- 0.2369 ● 6.TS
- 0.8823 ● 7.ANO
- 0.6241 ● 8.OCD

FE summary

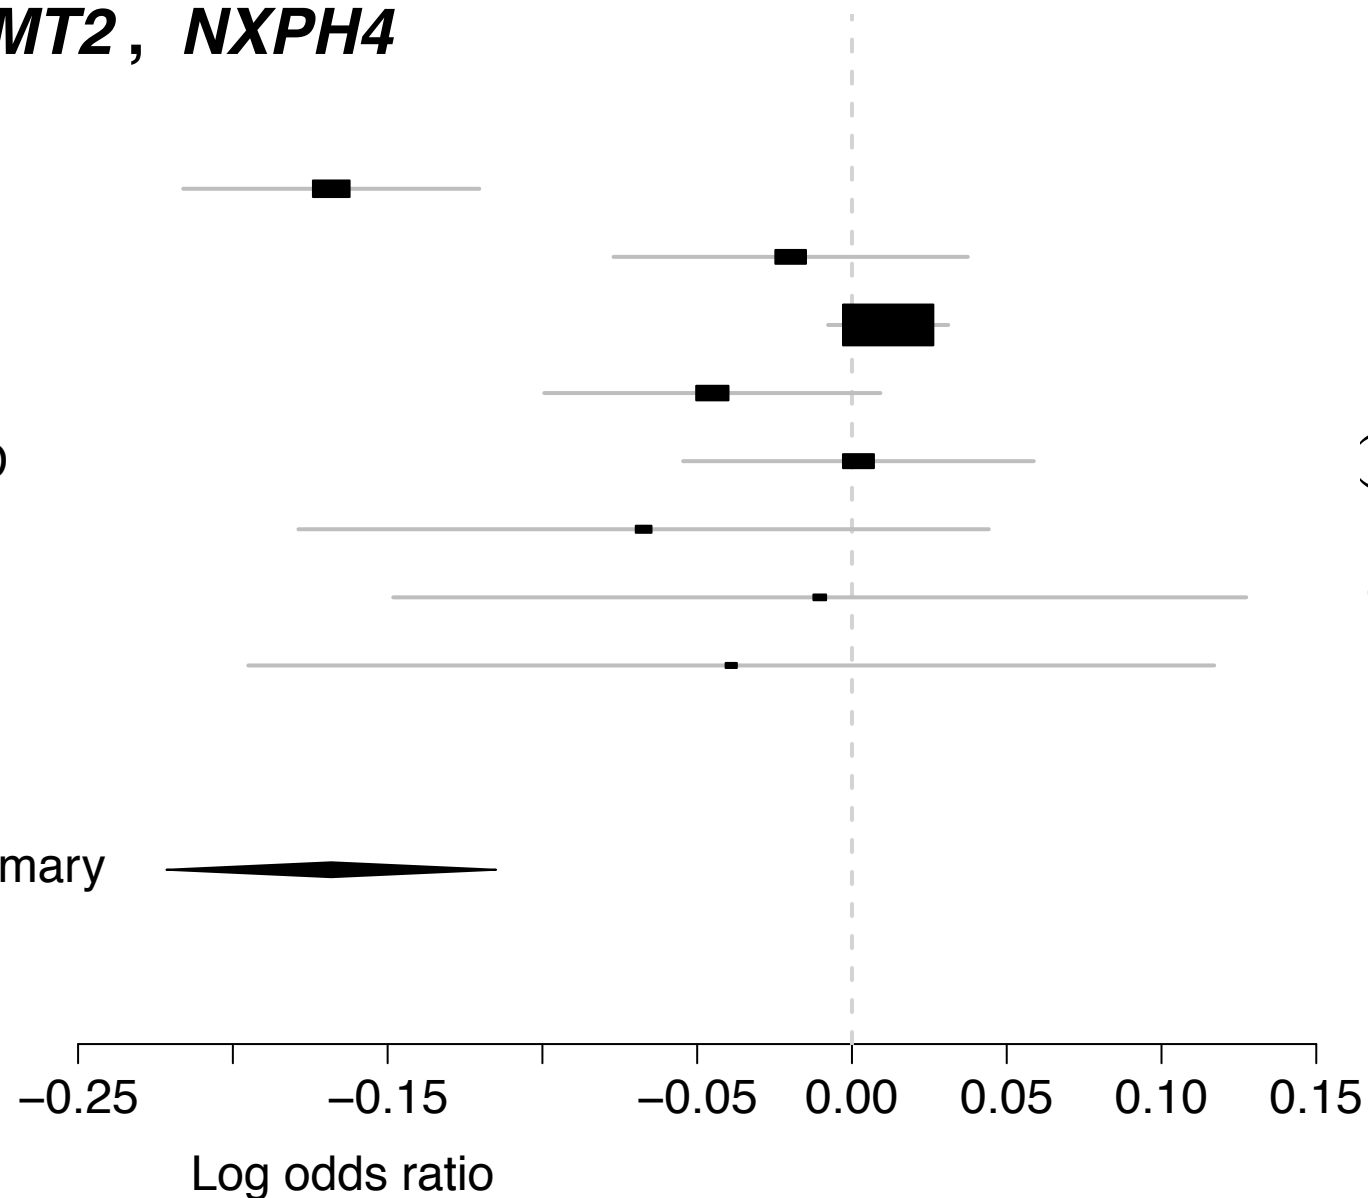

PM-Plot

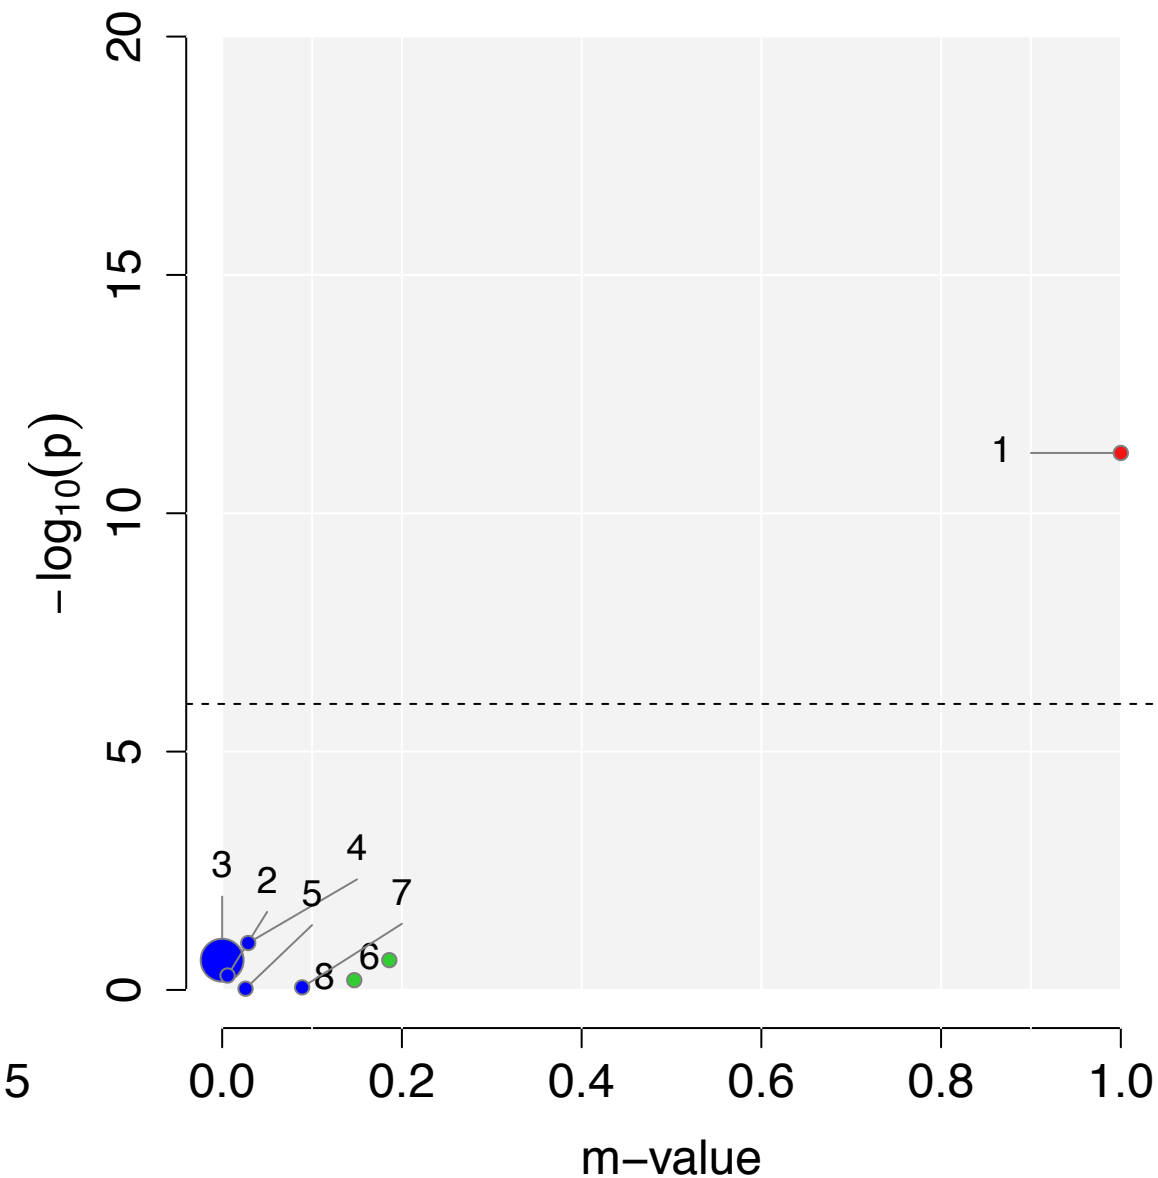

# rs12894153 (Meta $P = 2.32 \times 10^{-8}$ )

Gene : *RTN1*

## GWAS P-value

- 4.01 x 10<sup>-6</sup> ● 1.SCZ
- 0.5344 ● 2.BIP
- 7.05 x 10<sup>-7</sup> ● 3.MD
- 0.5838 ● 4.ASD
- 0.6471 ● 5.ADHD
- 0.3577 ● 6.TS
- 0.7296 ● 7.ANO
- 0.7001 ● 8.OCD

FE summary

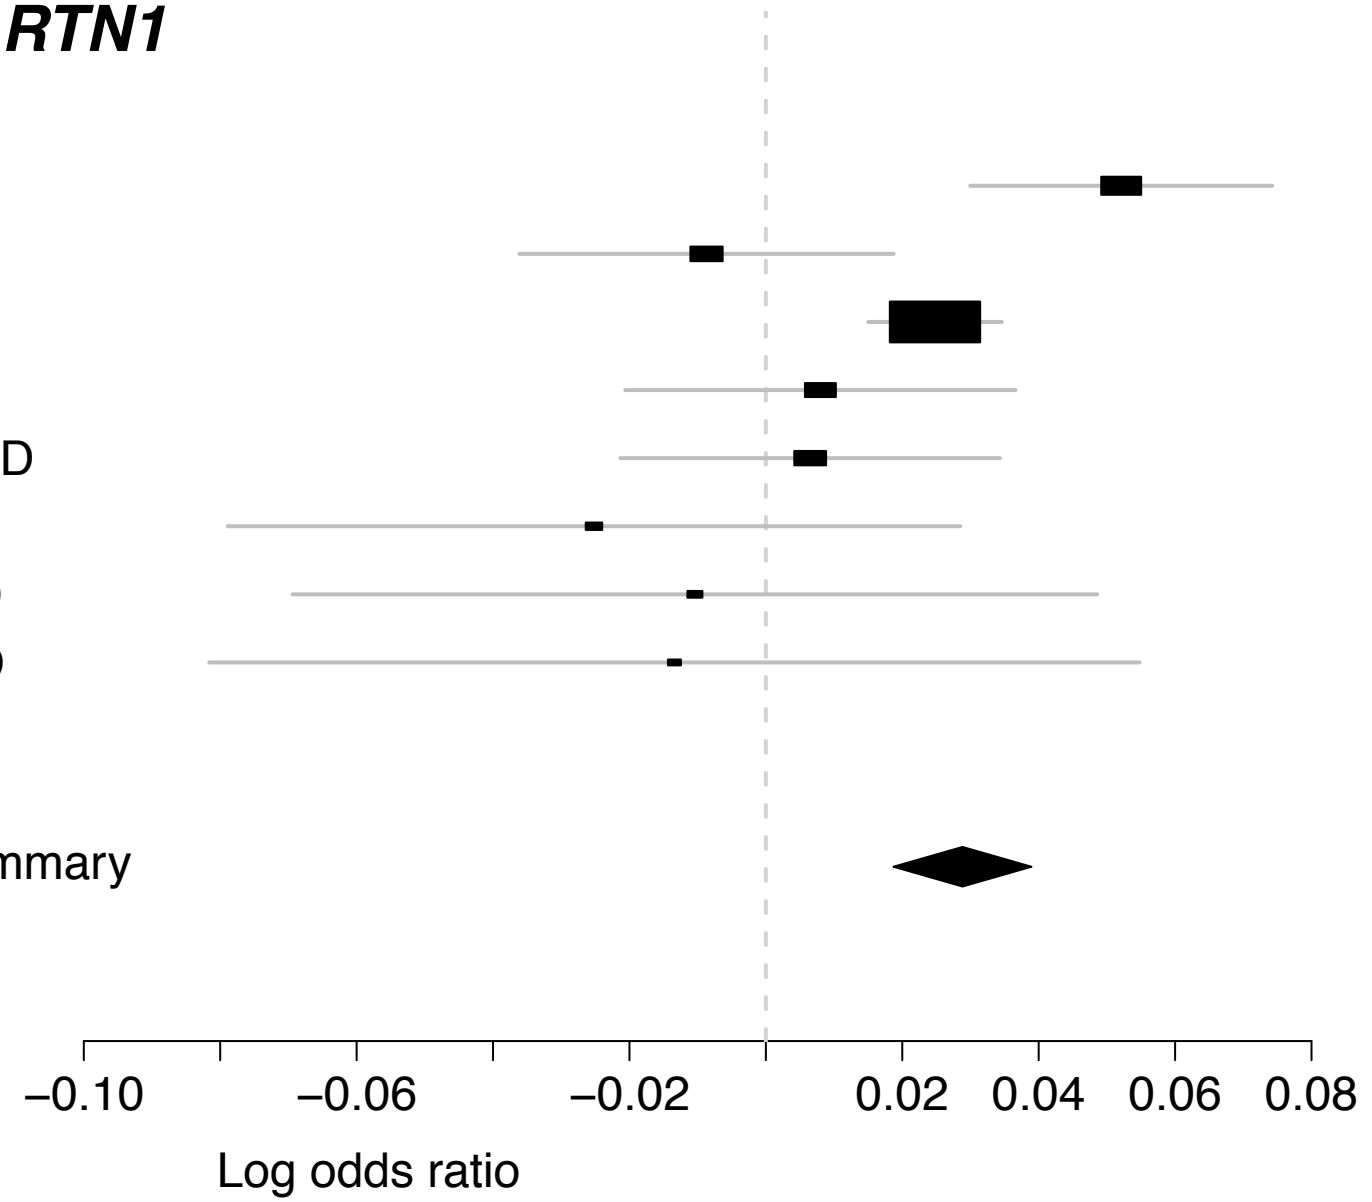

## PM-Plot

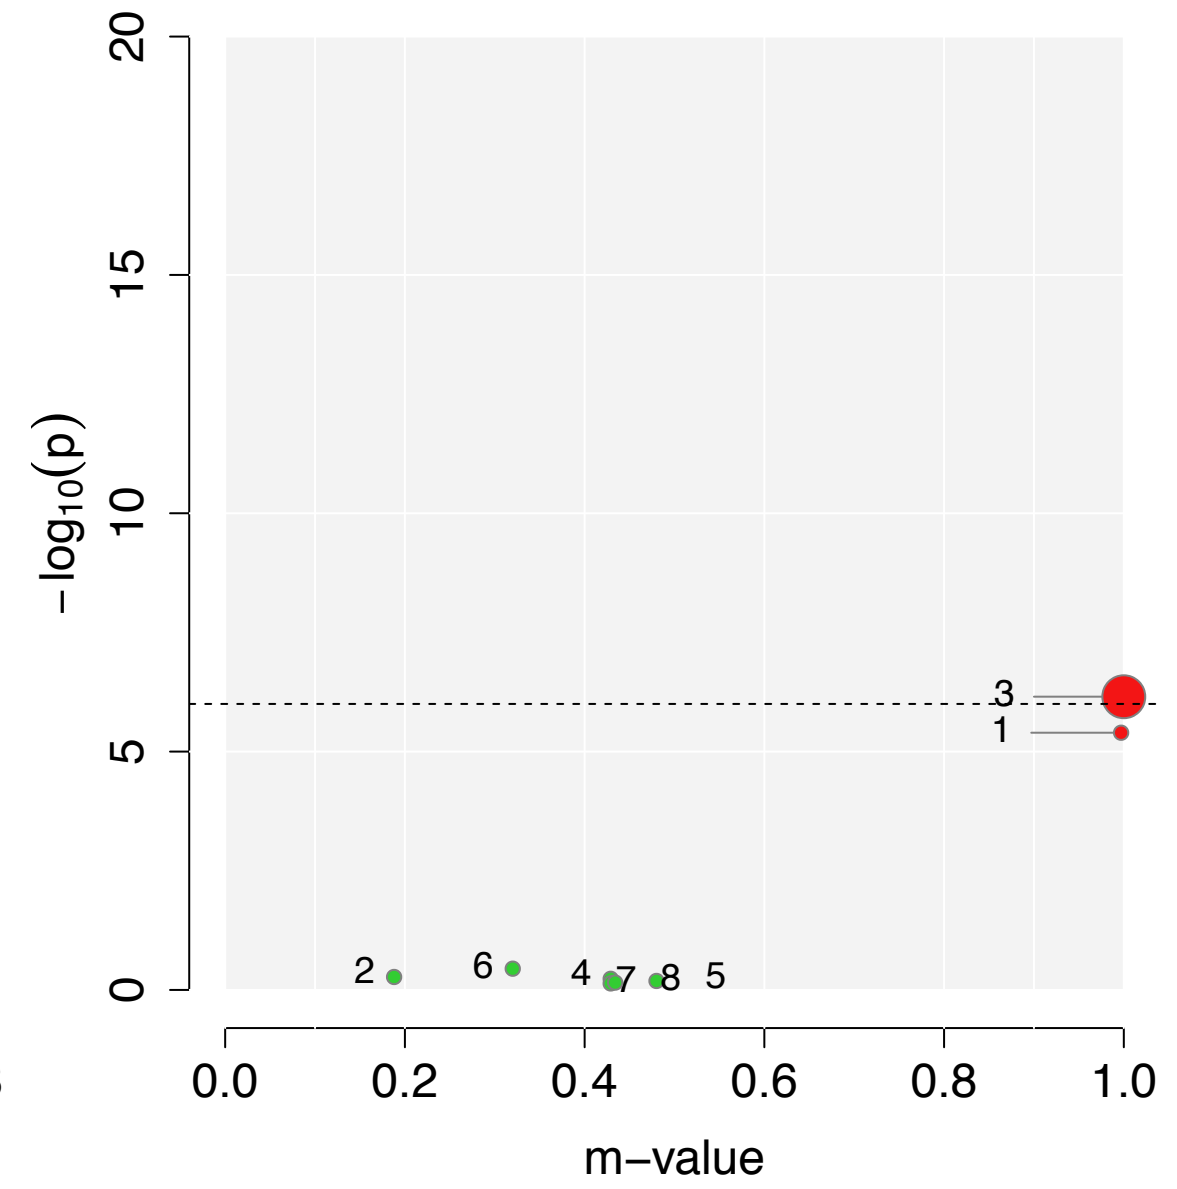

# rs12898460 (Meta $P = 4.36 \times 10^{-8}$ )

Gene : *C15orf53*

## GWAS P-value

- 0.1495 ● 1.SCZ
- $6.26 \times 10^{-8}$  ● 2.BIP
- 0.3659 ● 3.MD
- 0.6099 ● 4.ASD
- 0.0058 ● 5.ADHD
- 0.0011 ● 6.TS
- 0.1853 ● 7.ANO
- 0.8857 ● 8.OCD

FE summary

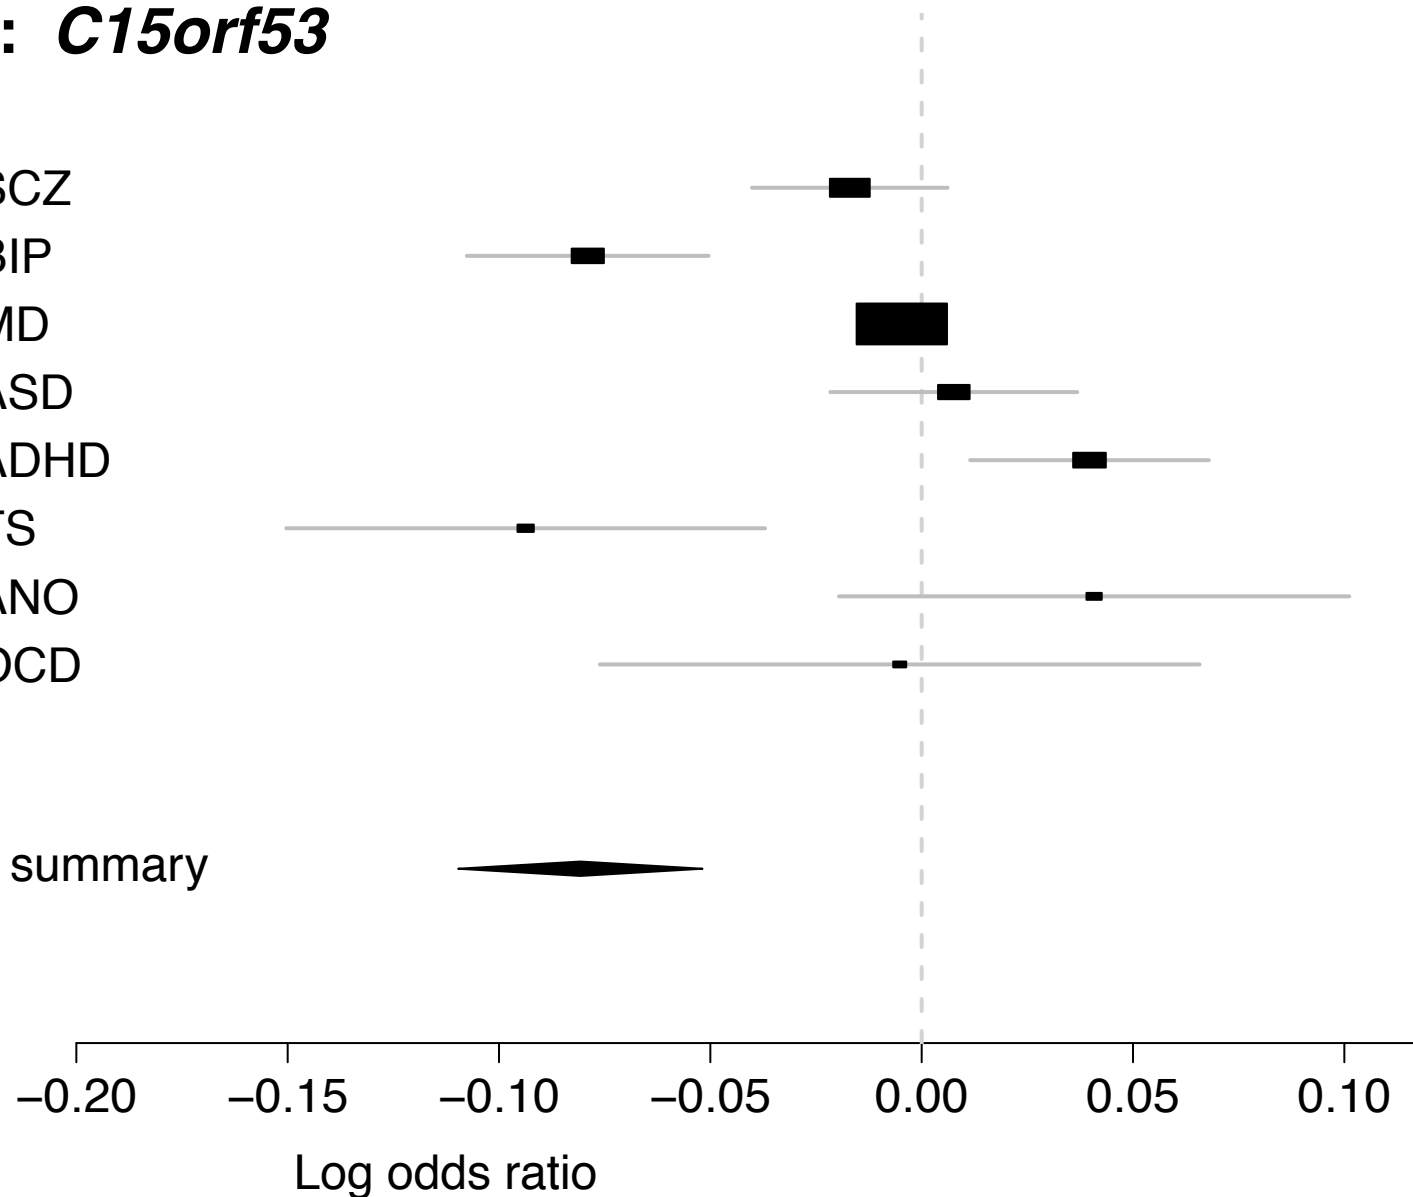

## PM-Plot

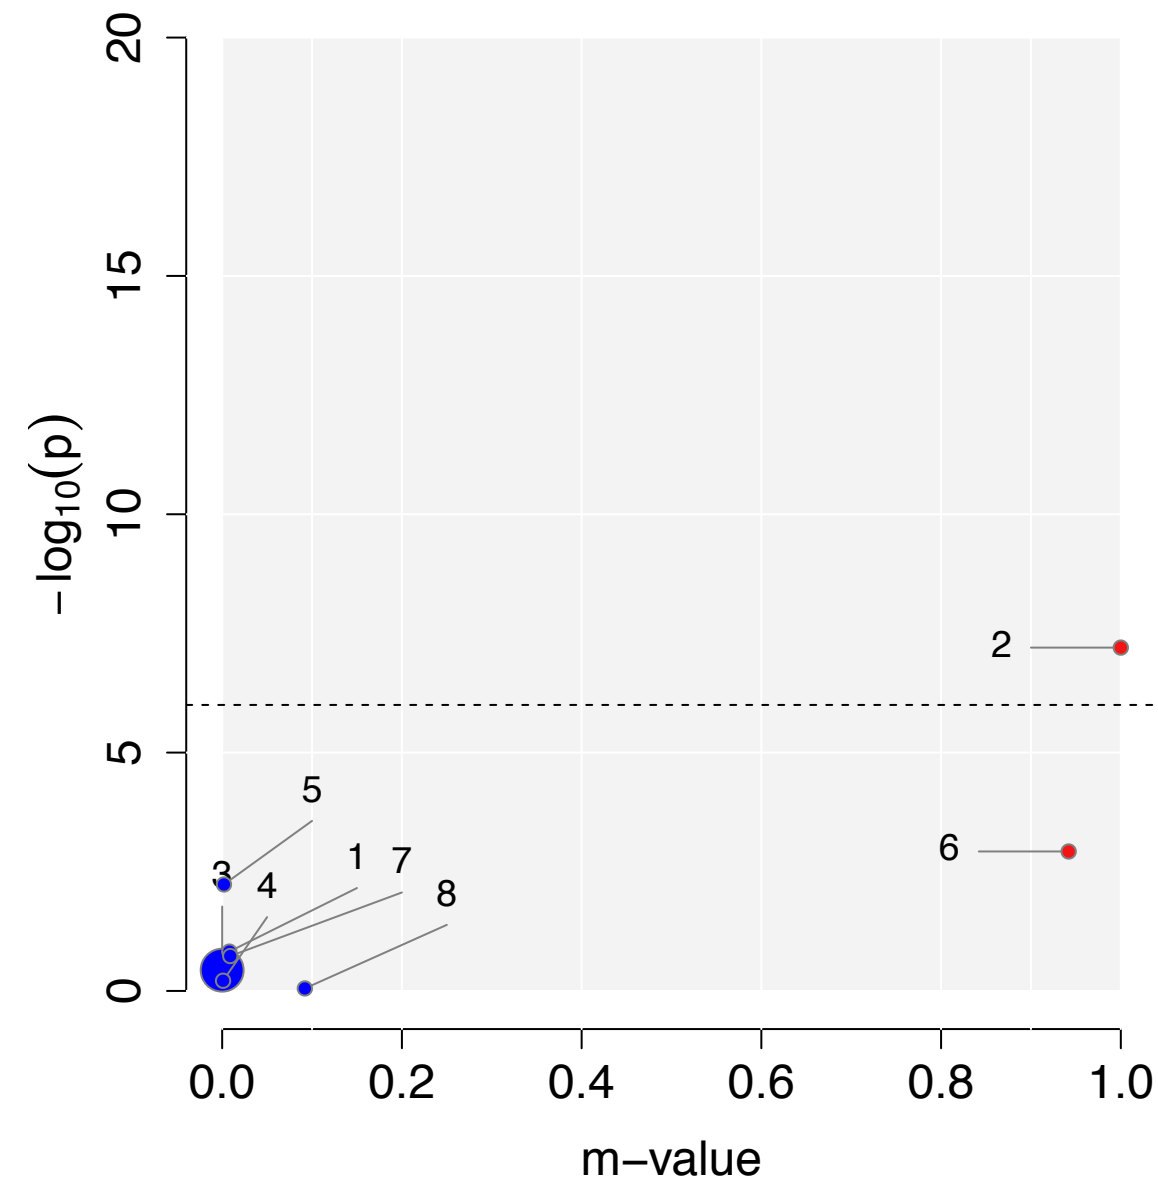

# rs12958048 (Meta $P = 1.04 \times 10^{-12}$ )

Gene : *TCF4*

## GWAS P-value

- 2.60 x 10<sup>-5</sup> ● 1.SCZ
- 0.0440 ● 2.BIP
- 3.40 x 10<sup>-11</sup> ● 3.MD
- 0.7766 ● 4.ASD
- 0.3520 ● 5.ADHD
- 0.6021 ● 6.TS
- 0.3509 ● 7.ANO
- 0.8370 ● 8.OCD

FE summary

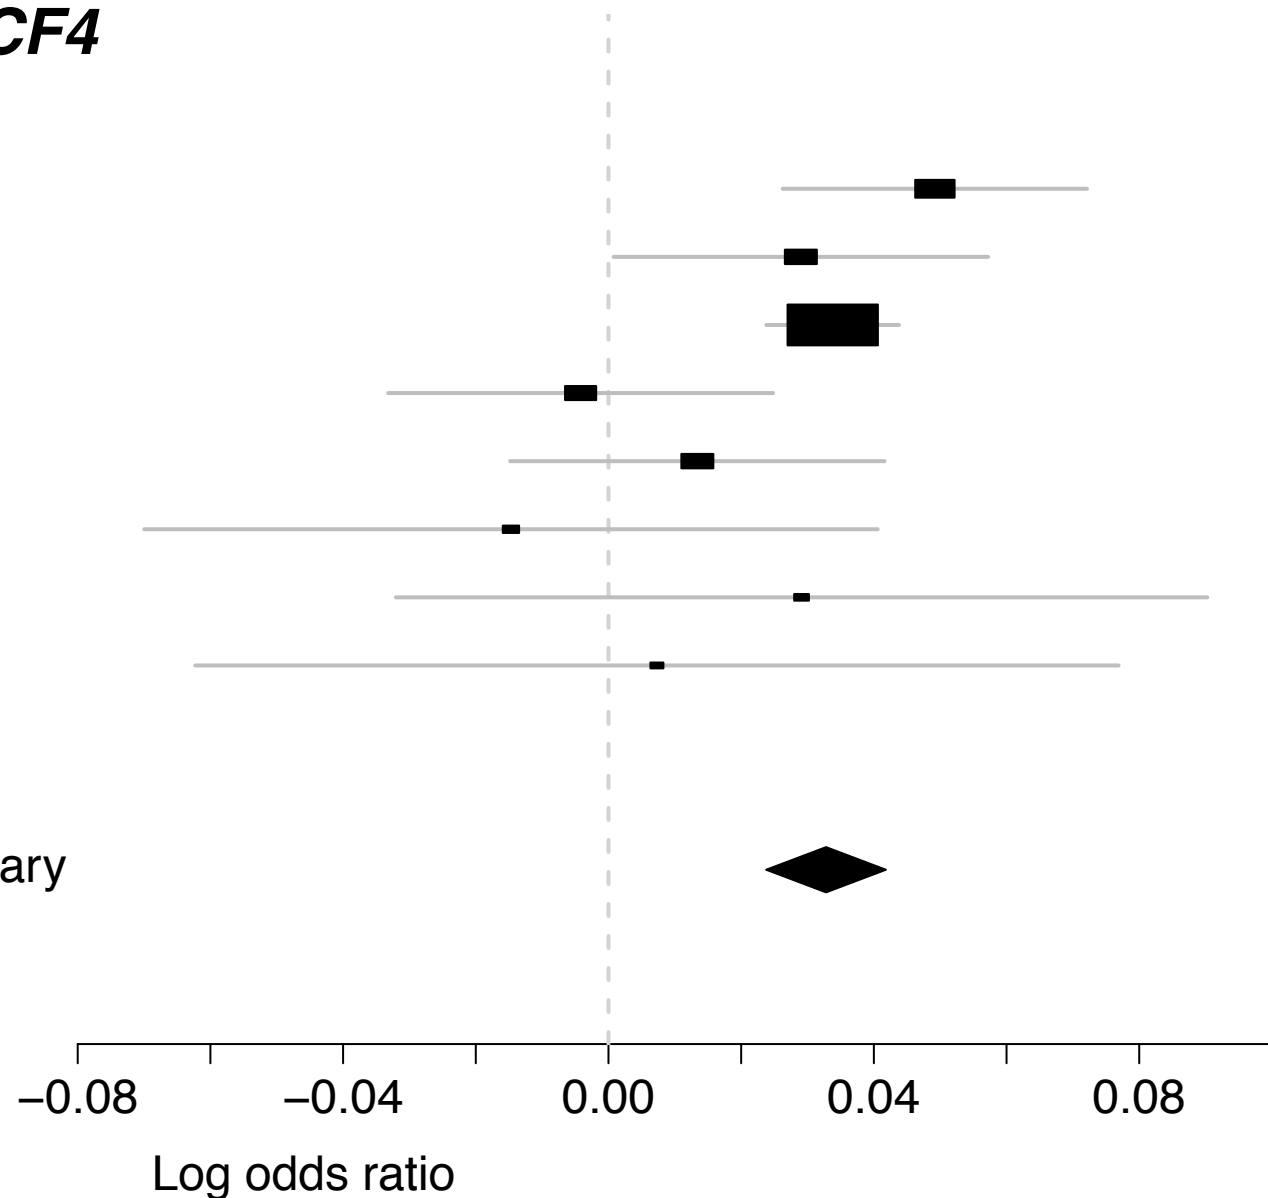

## PM-Plot

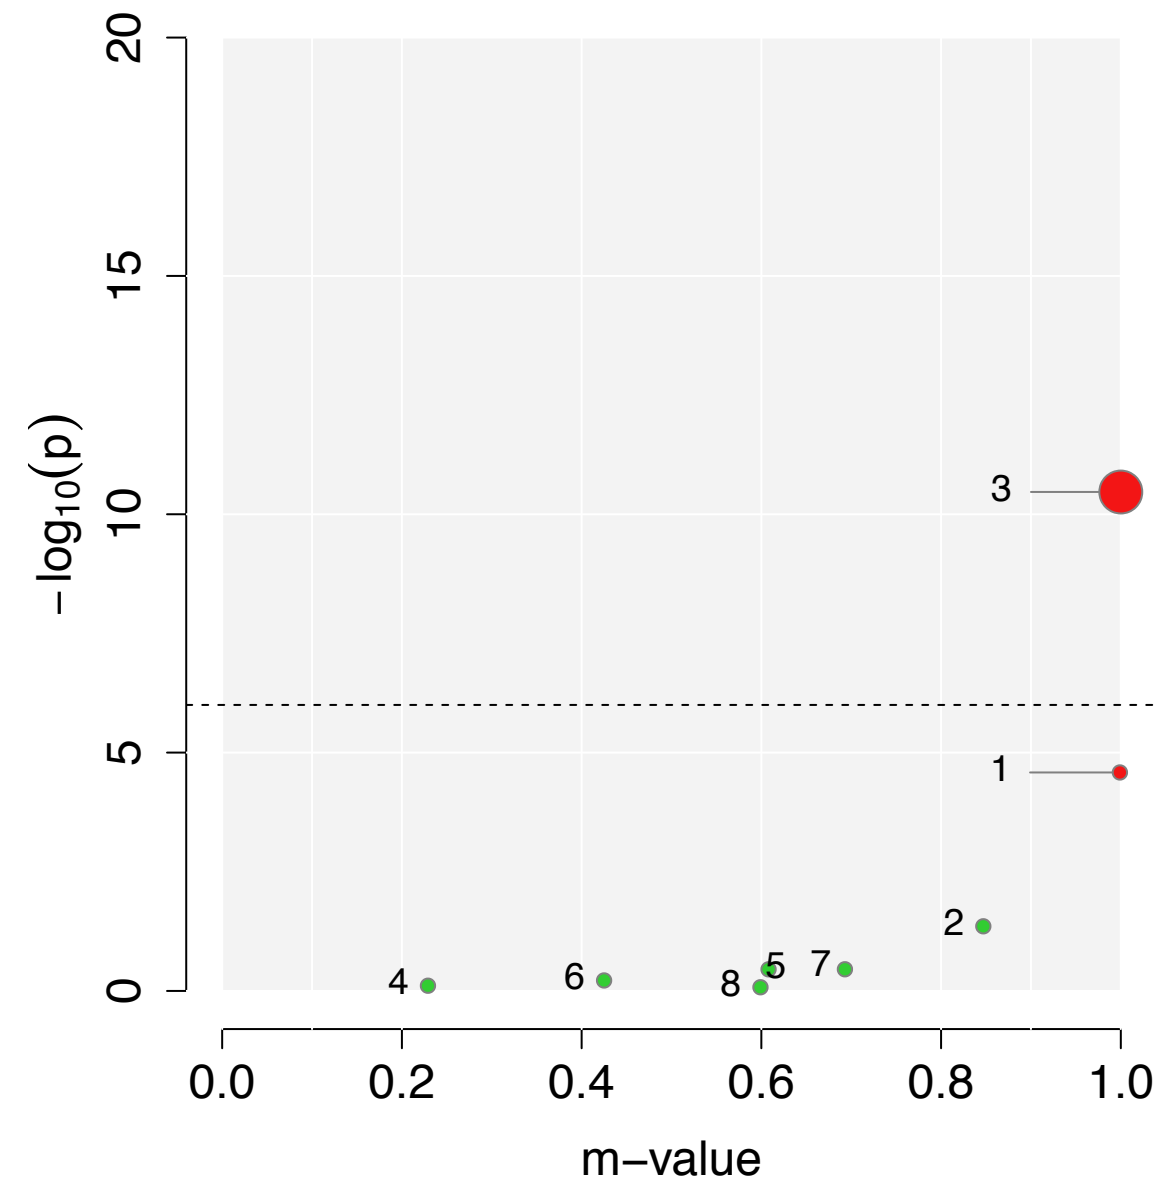

# rs13217619 (Meta $P = 1.04 \times 10^{-27}$ )

Gene : **ZSCAN31** , **ZKSCAN3**

## GWAS P-value

- 1.91 x 10<sup>-29</sup> ● 1.SCZ
- 9.76 x 10<sup>-5</sup> ● 2.BIP
- 5.71 x 10<sup>-7</sup> ● 3.MD
- 0.1541 ● 4.ASD
- 0.2659 ● 5.ADHD
- 0.6853 ● 6.TS
- 0.6070 ● 7.ANO
- 0.0255 ● 8.OCD

FE summary

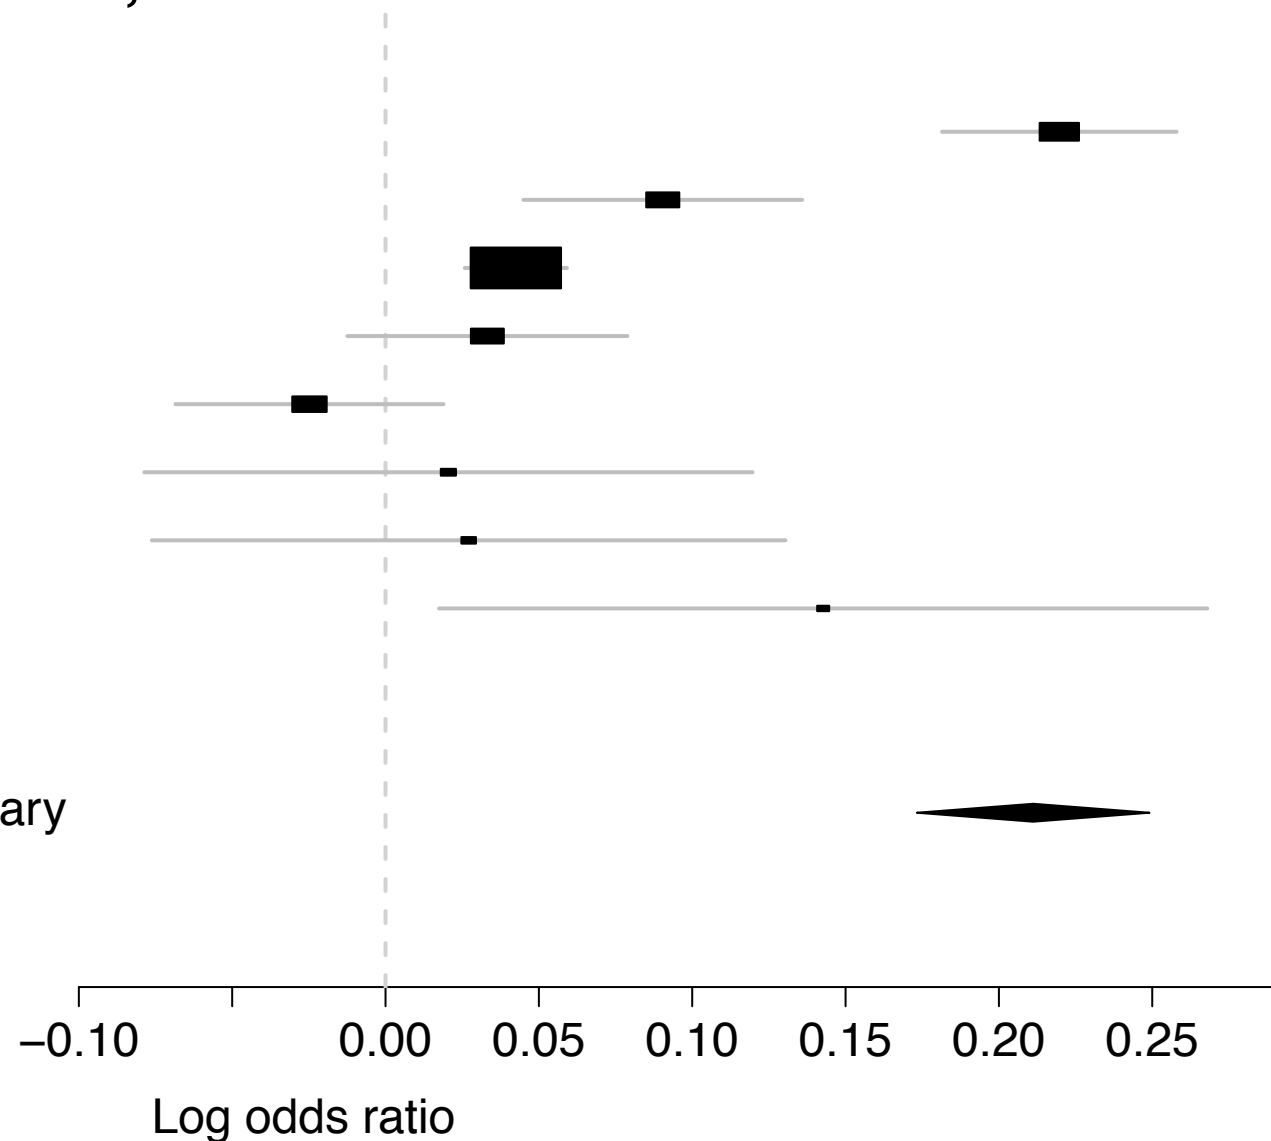

## PM-Plot

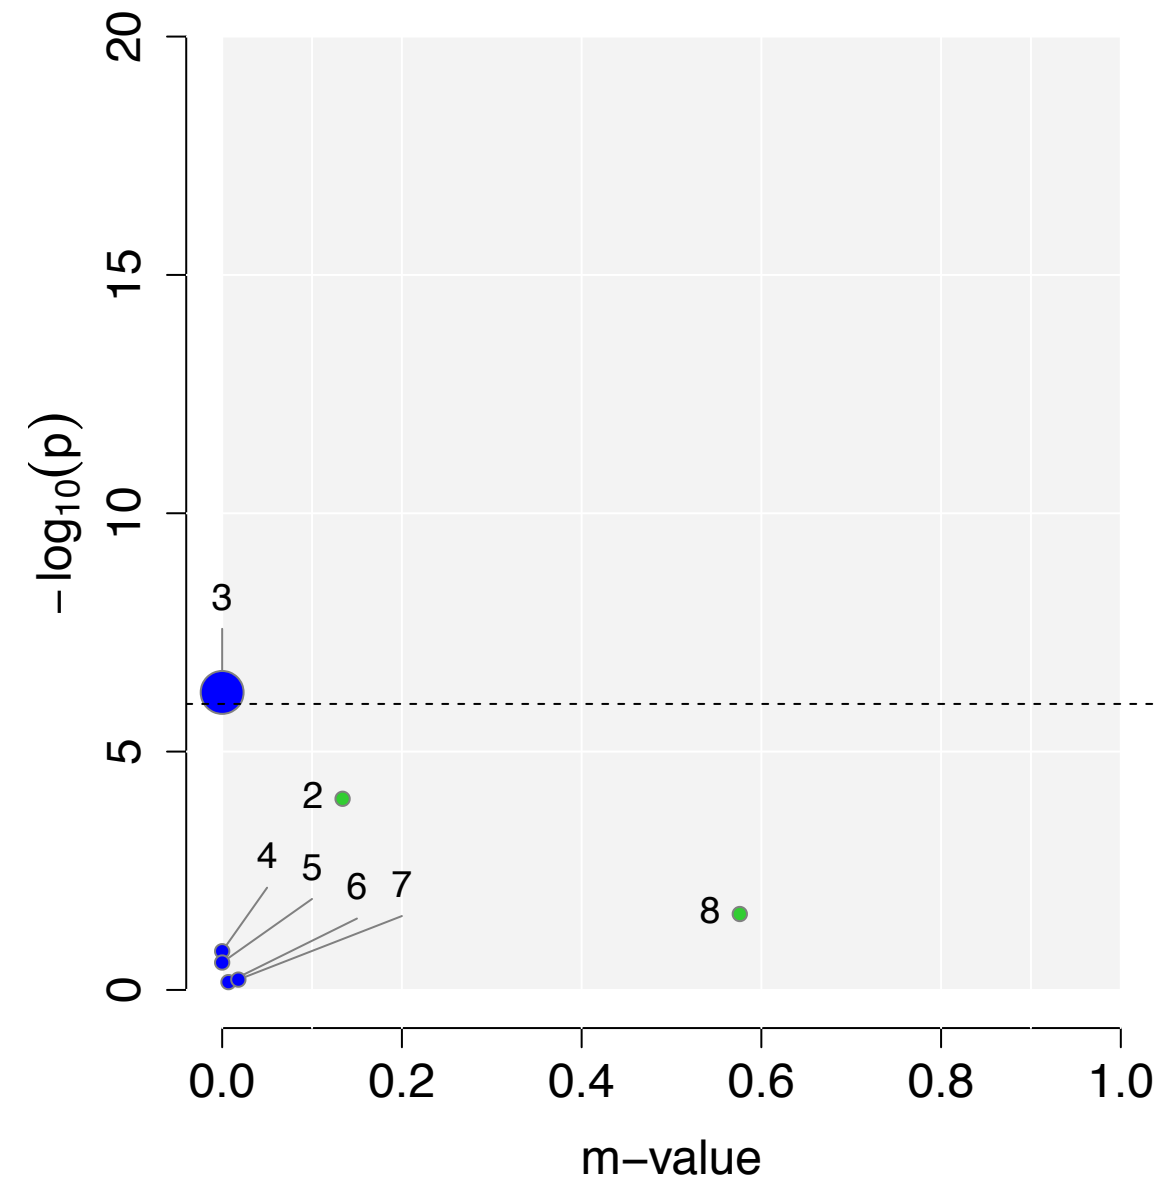

# rs13240464 (Meta $P = 5.55 \times 10^{-11}$ )

Gene : *IMMP2L*

## GWAS P-value

- 3.47 x 10<sup>NA</sup> ● 1.SCZ
- 0.0782 ● 2.BIP
- 0.1525 ● 3.MD
- 0.7698 ● 4.ASD
- 0.1041 ● 5.ADHD
- 0.0265 ● 6.TS
- 0.1340 ● 7.ANO
- 0.0814 ● 8.OCD

FE summary

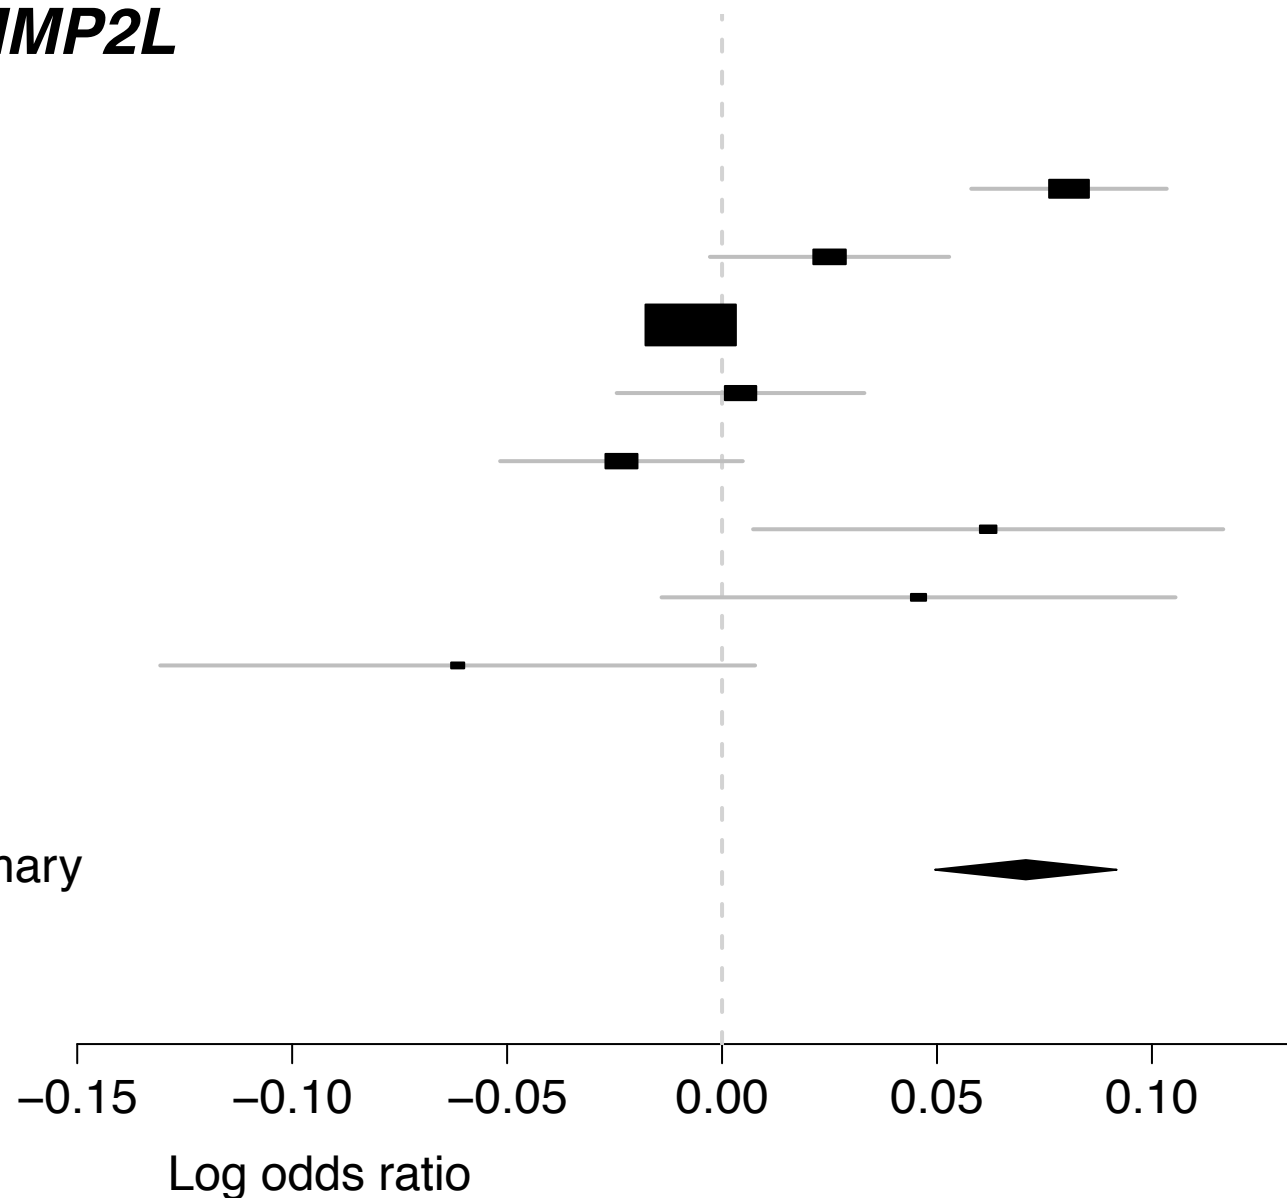

## PM-Plot

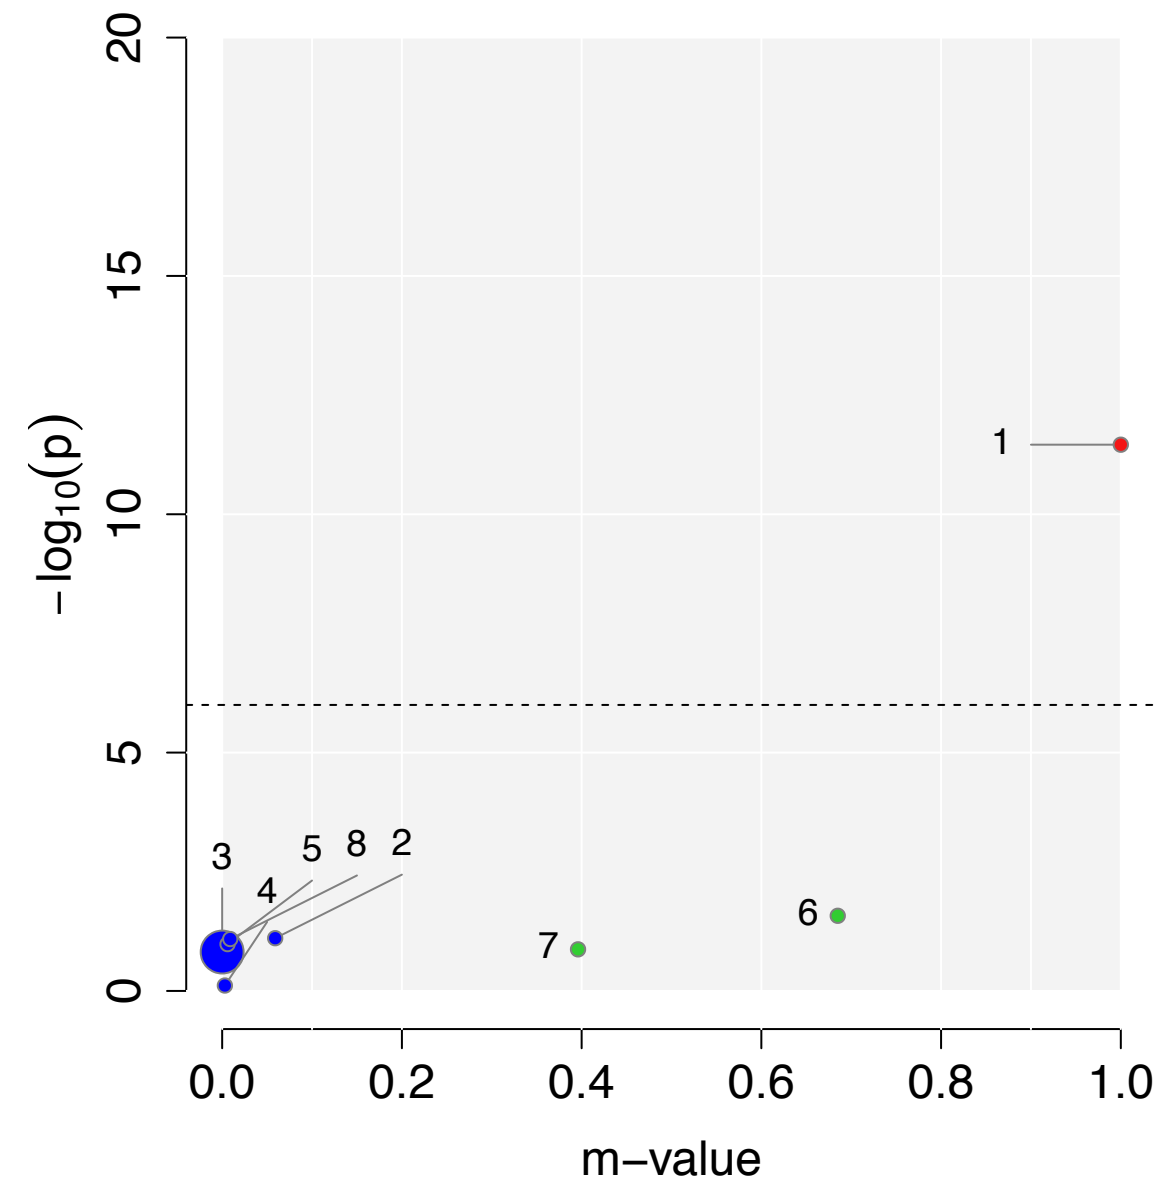

# rs28669119 (Meta $P = 1.64 \times 10^{-9}$ )

Gene : *MEF2C*

## GWAS P-value

- 1.38 x 10<sup>-6</sup> ● 1.SCZ
- 0.1446 ● 2.BIP
- 0.0196 ● 3.MD
- 0.3963 ● 4.ASD
- 3.09 x 10<sup>-6</sup> ● 5.ADHD
- 0.3651 ● 6.TS
- 0.4284 ● 7.ANO
- 0.0513 ● 8.OCD

FE summary

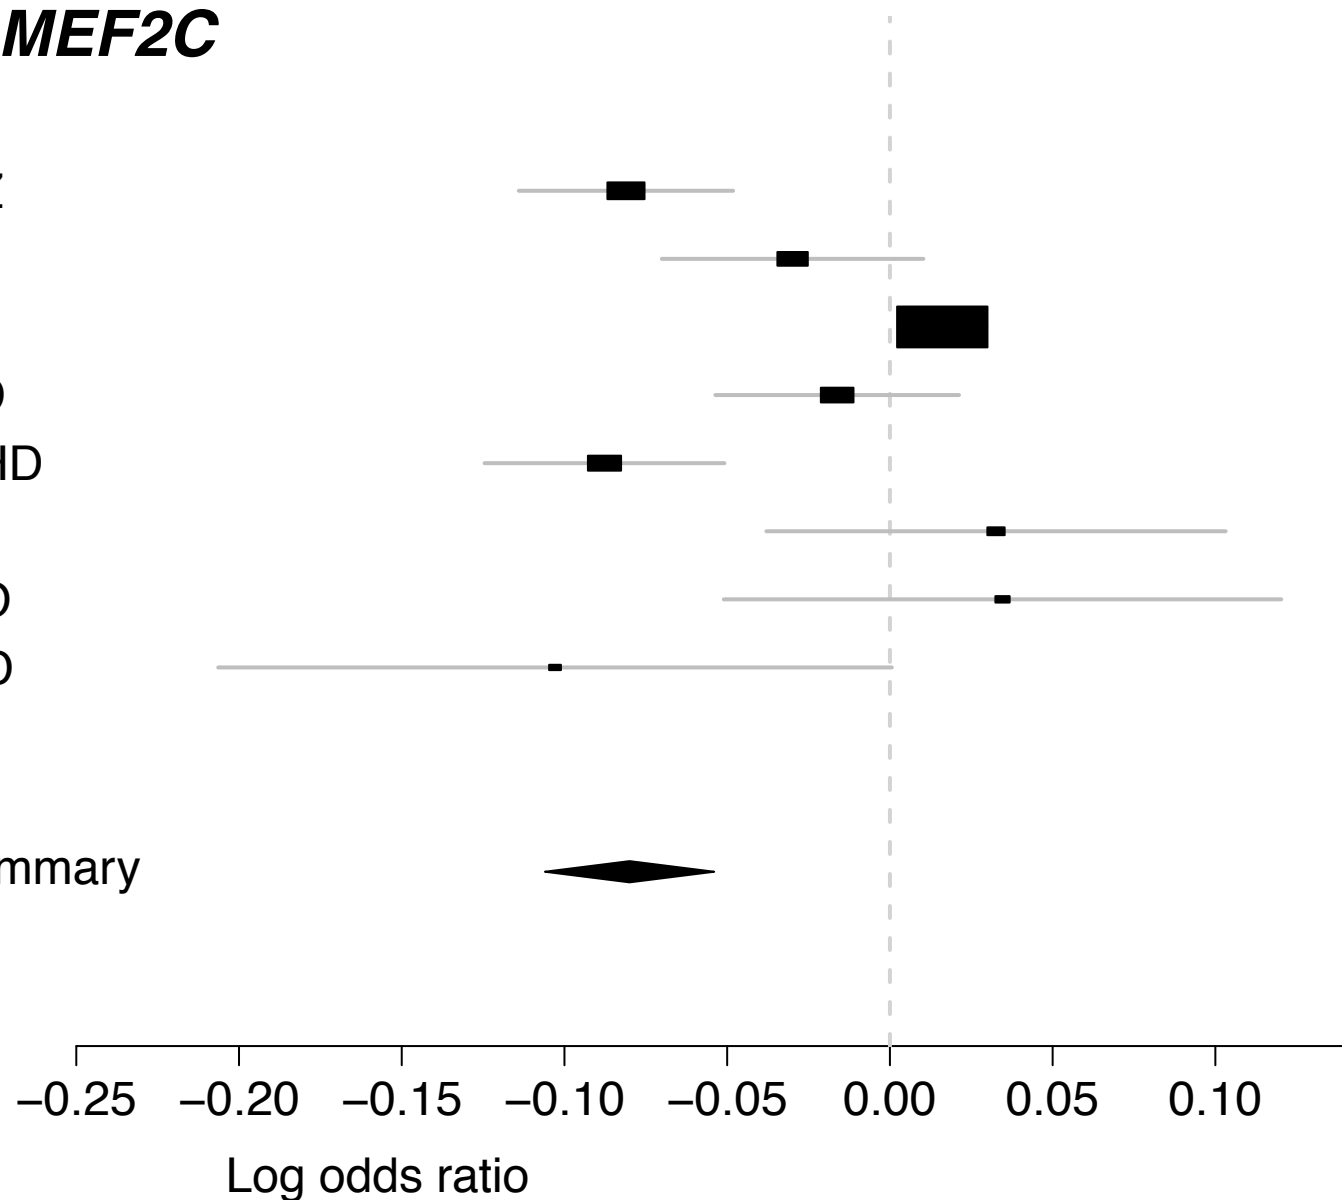

## PM-Plot

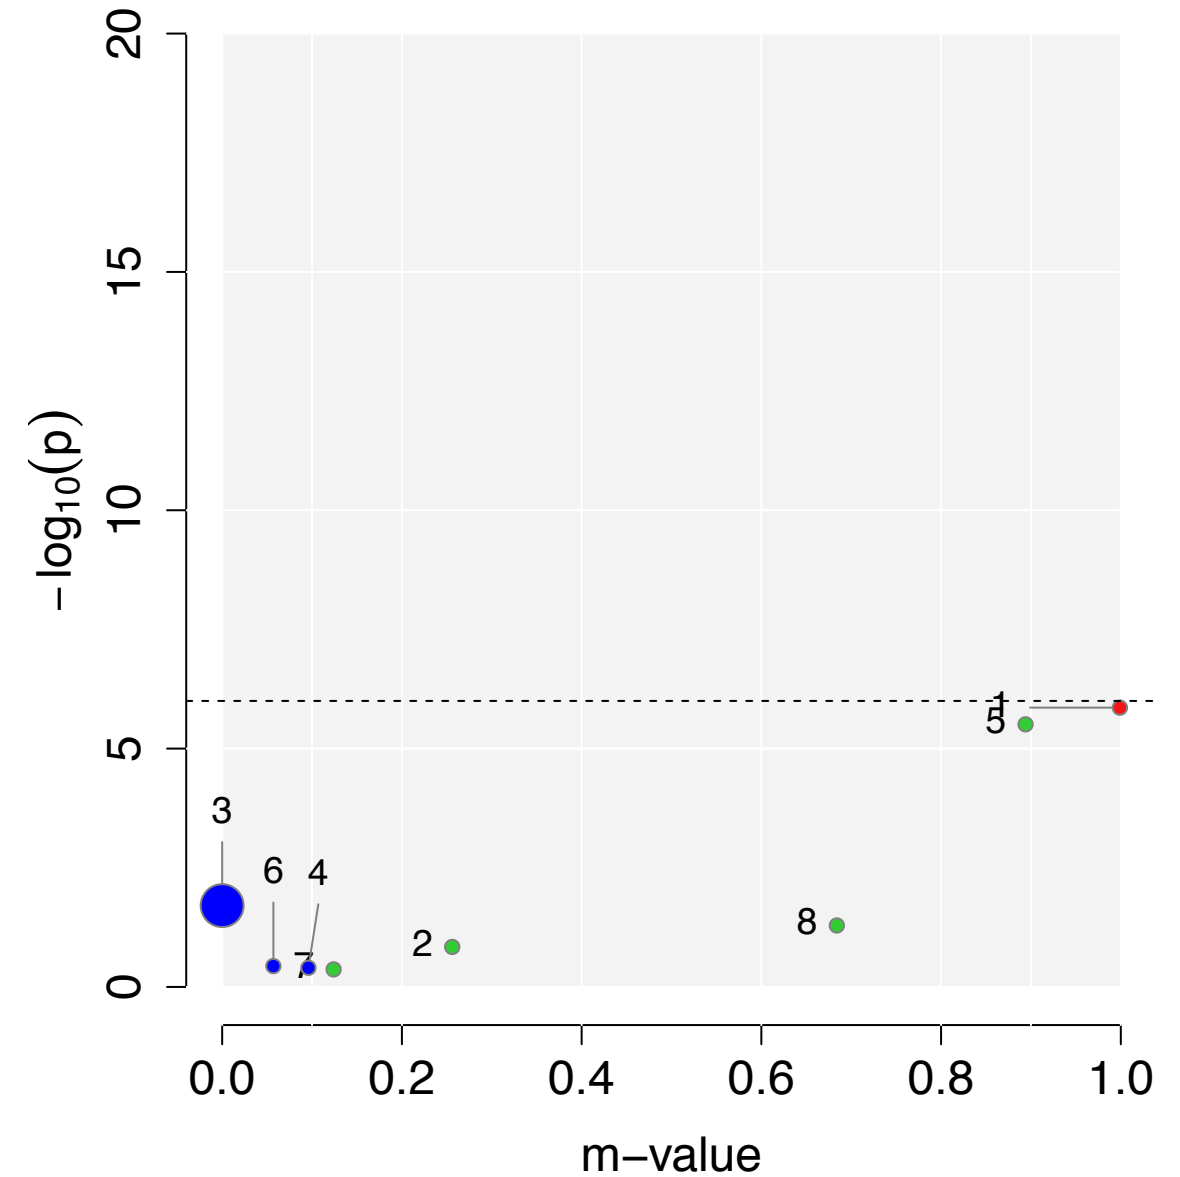

rs28681284 (Meta  $P = 5.59 \times 10^{-12}$ )

Gene : *CHRNA3*, *CHRNA4*

GWAS P-value

- 5.77 x 10<sup>-13</sup> ● 1.SCZ
- 0.0058 ● 2.BIP
- 0.4706 ● 3.MD
- 0.2740 ● 4.ASD
- 0.0287 ● 5.ADHD
- 0.0120 ● 6.TS
- 0.1801 ● 7.ANO
- 0.1634 ● 8.OCD

FE summary

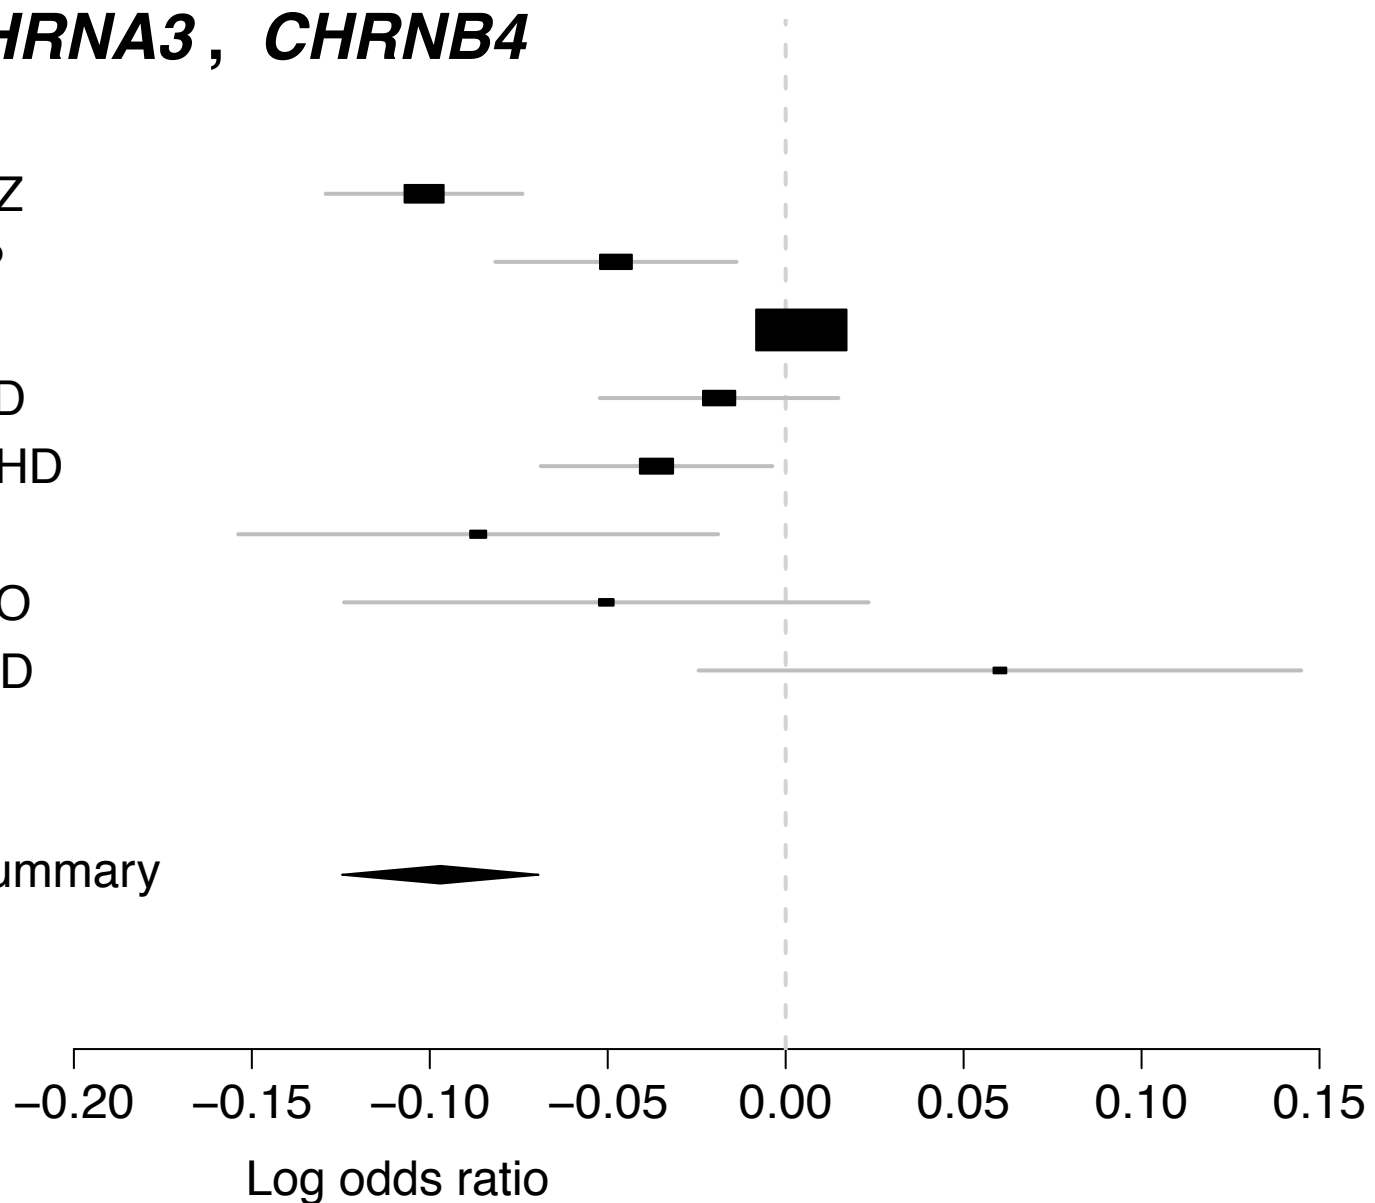

PM-Plot

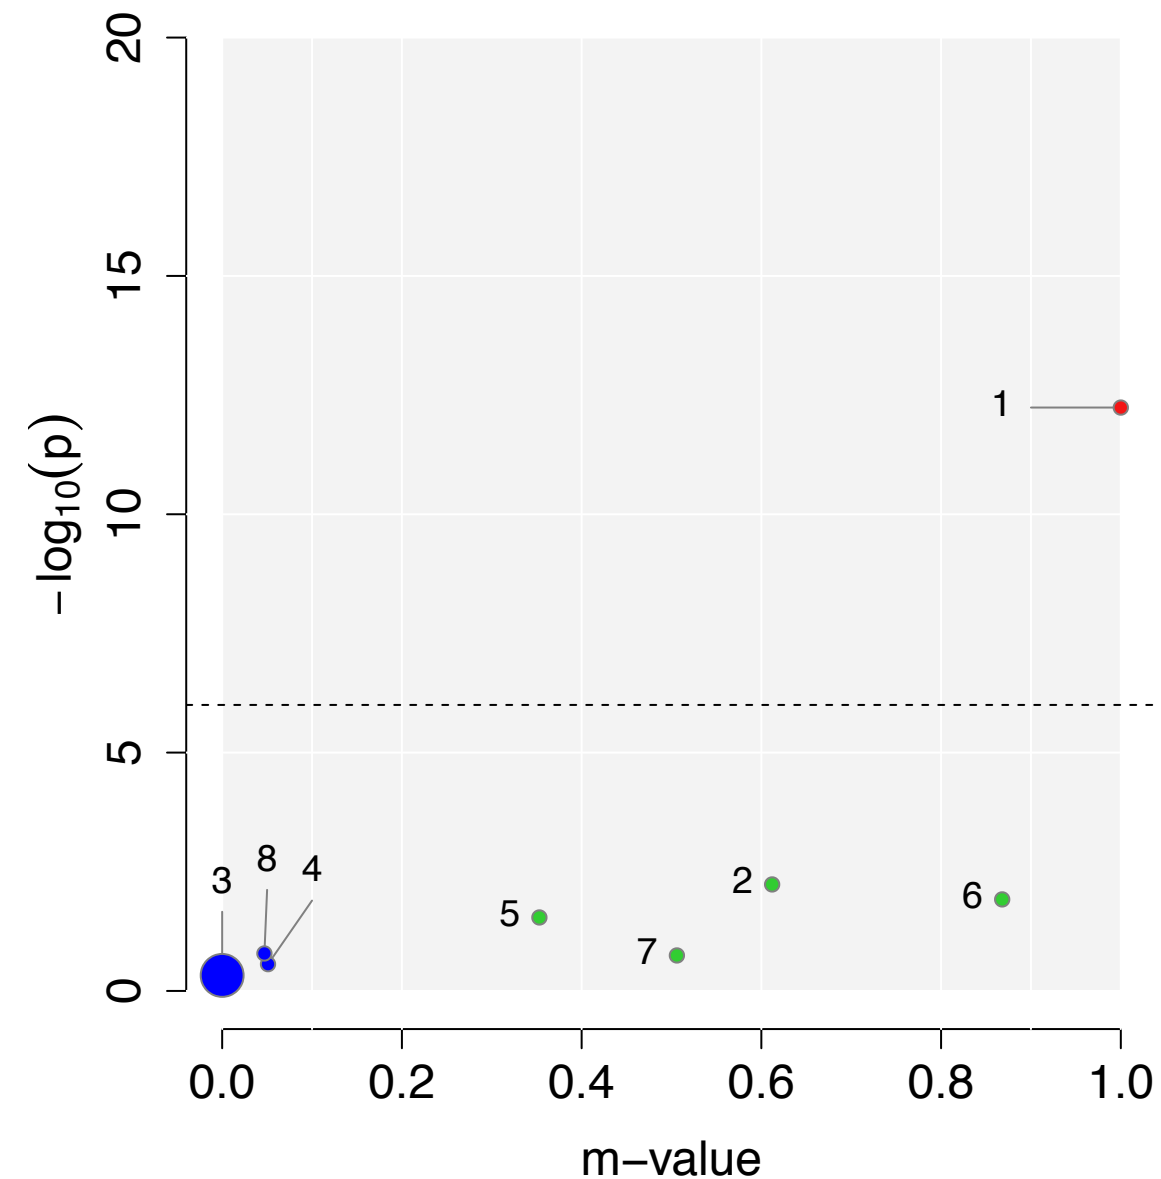



rs34215985 (Meta  $P = 3e-1 \times 10^{-10}$ )

Gene : *SLC30A9*, *DCAF4L1*

GWAS P-value

- 0.0588 ● 1.SCZ
- 0.2426 ● 2.BIP
- $3.21 \times 10^{-9}$  ● 3.MD
- 0.0009 ● 4.ASD
- 0.0221 ● 5.ADHD
- 0.1441 ● 6.TS
- 0.0614 ● 7.ANO
- 0.3126 ● 8.OCD

FE summary

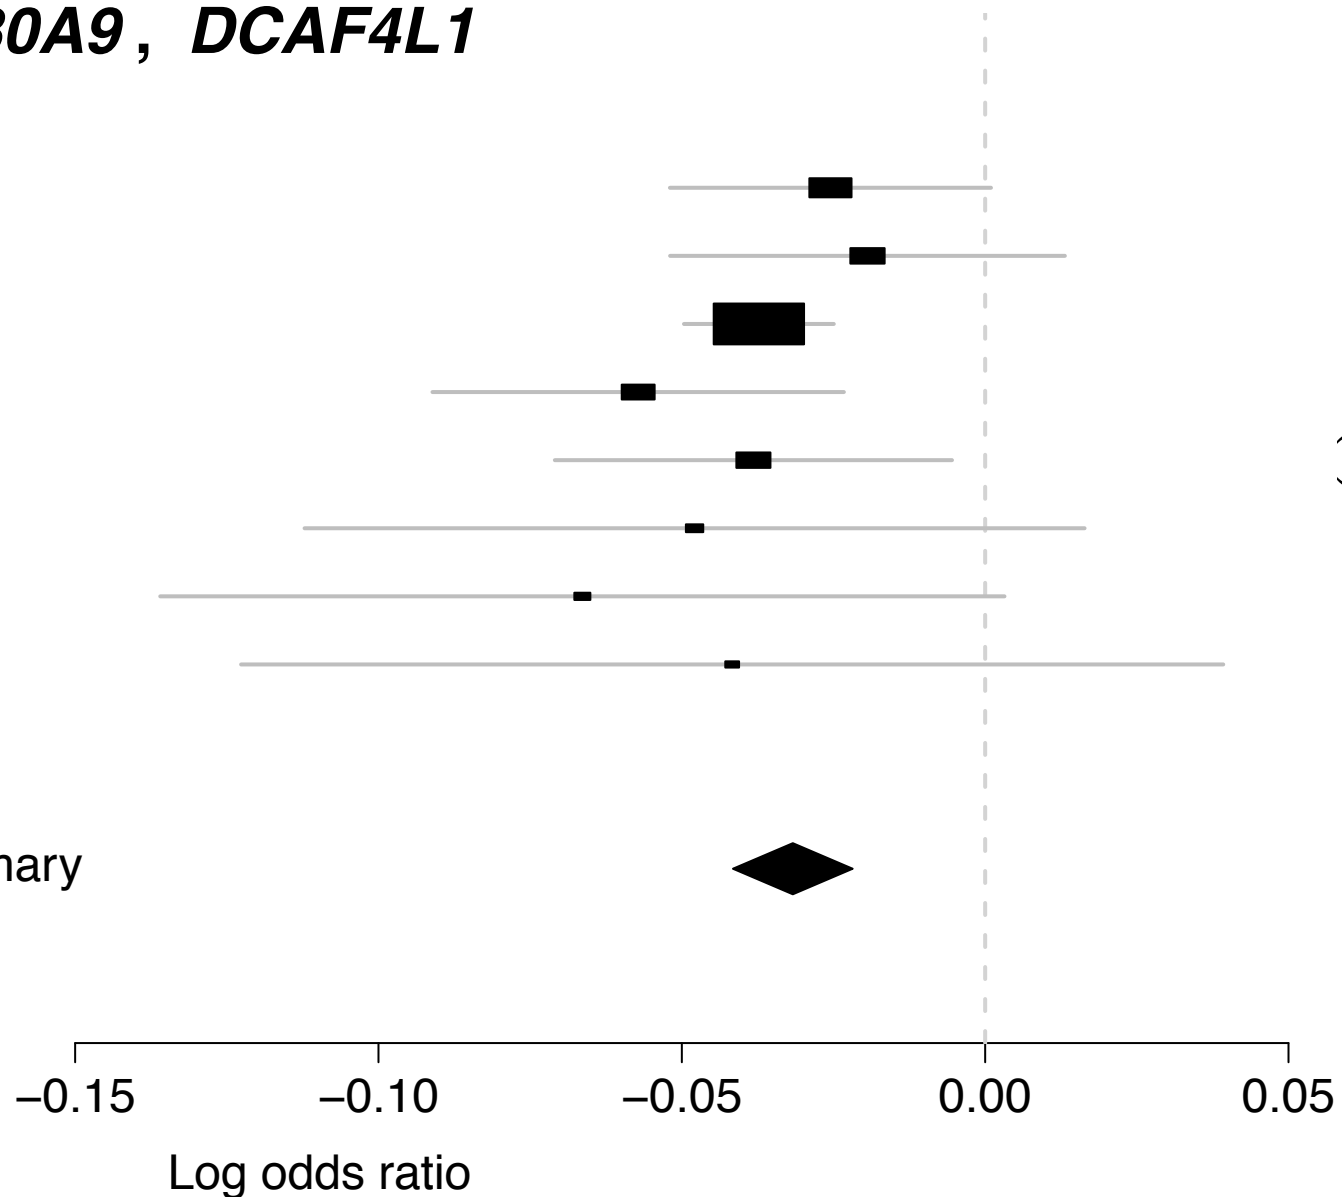

PM-Plot

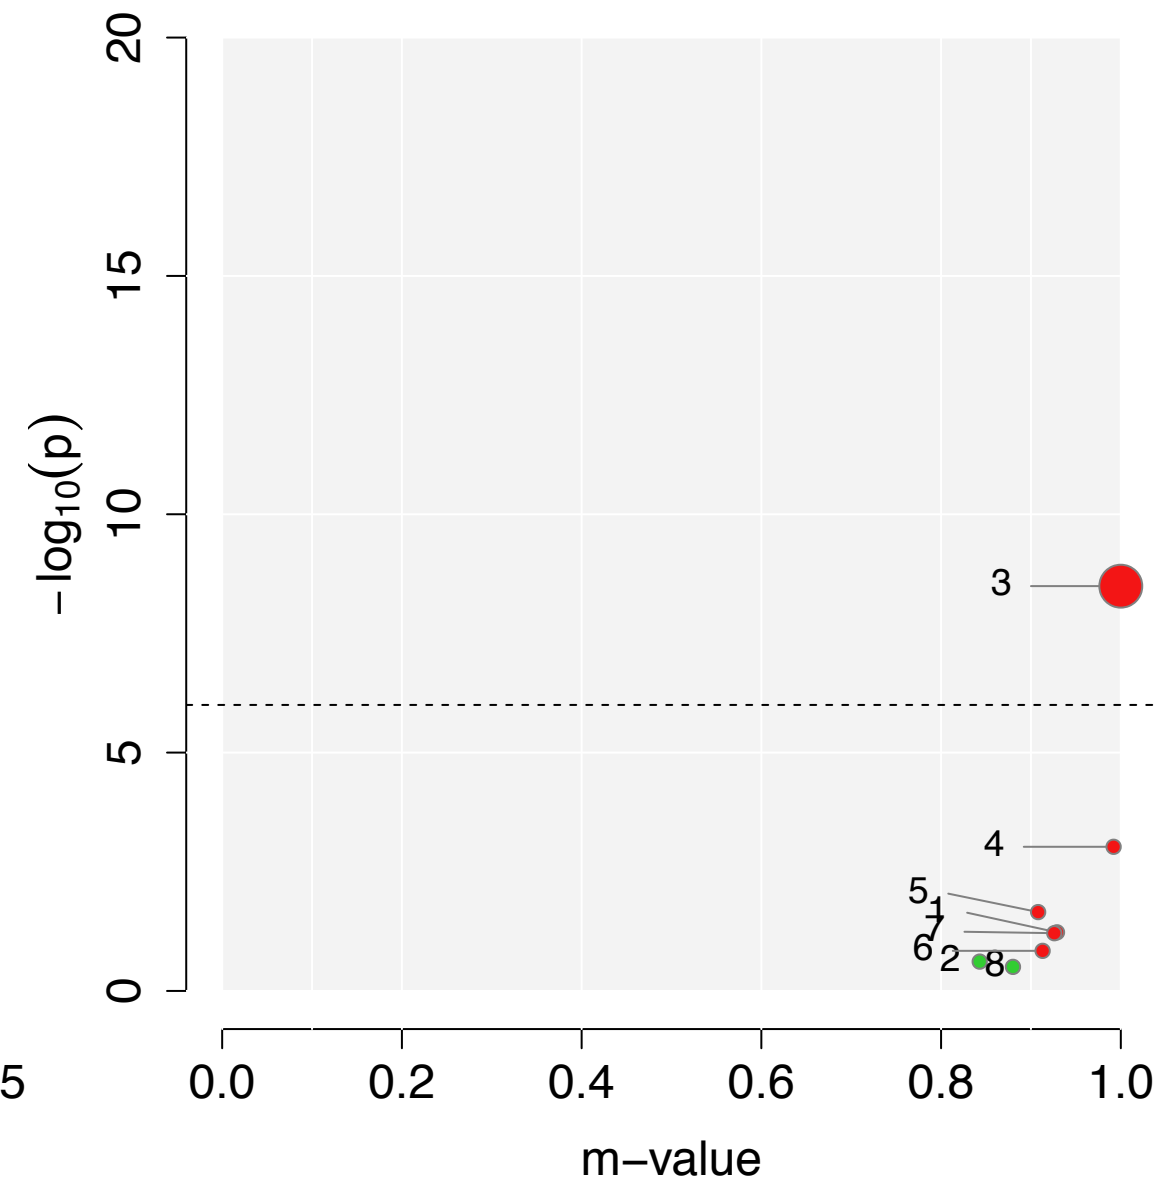

# rs35225200 (Meta $P = 1.11 \times 10^{-10}$ )

Gene : ***SLC39A8***

## GWAS P-value

- 9.83 x 10<sup>-3</sup> ● 1.SCZ
- 0.1250 ● 2.BIP
- 0.2774 ● 3.MD
- 0.1051 ● 4.ASD
- 0.9207 ● 5.ADHD
- 0.6680 ● 6.TS
- 0.4772 ● 7.ANO
- 0.2346 ● 8.OCD

FE summary

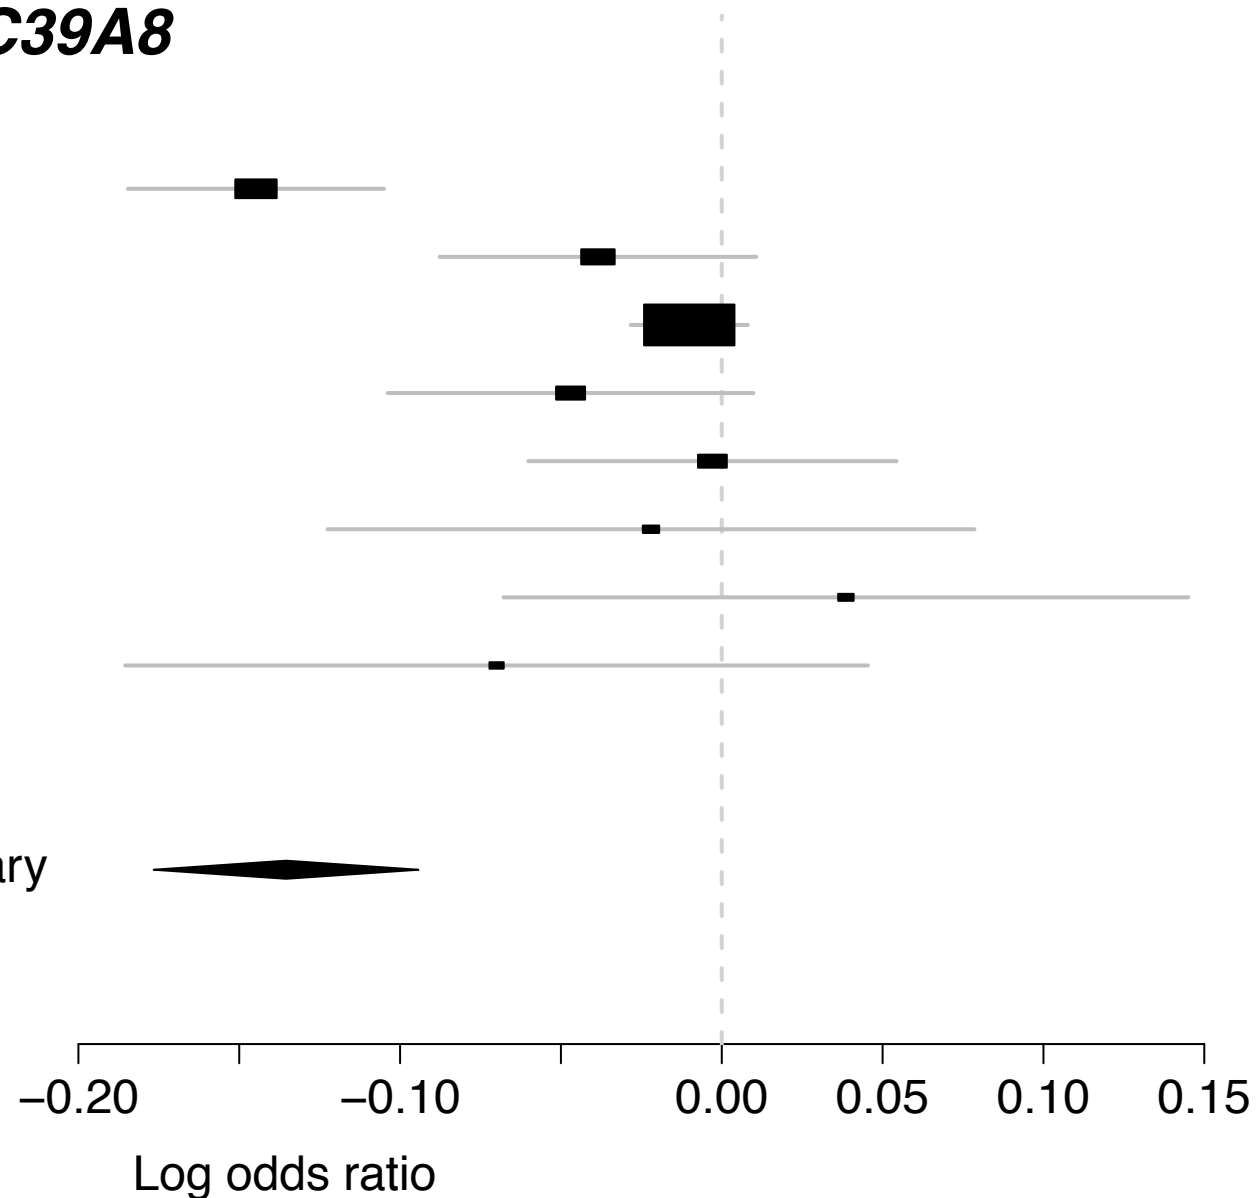

## PM-Plot

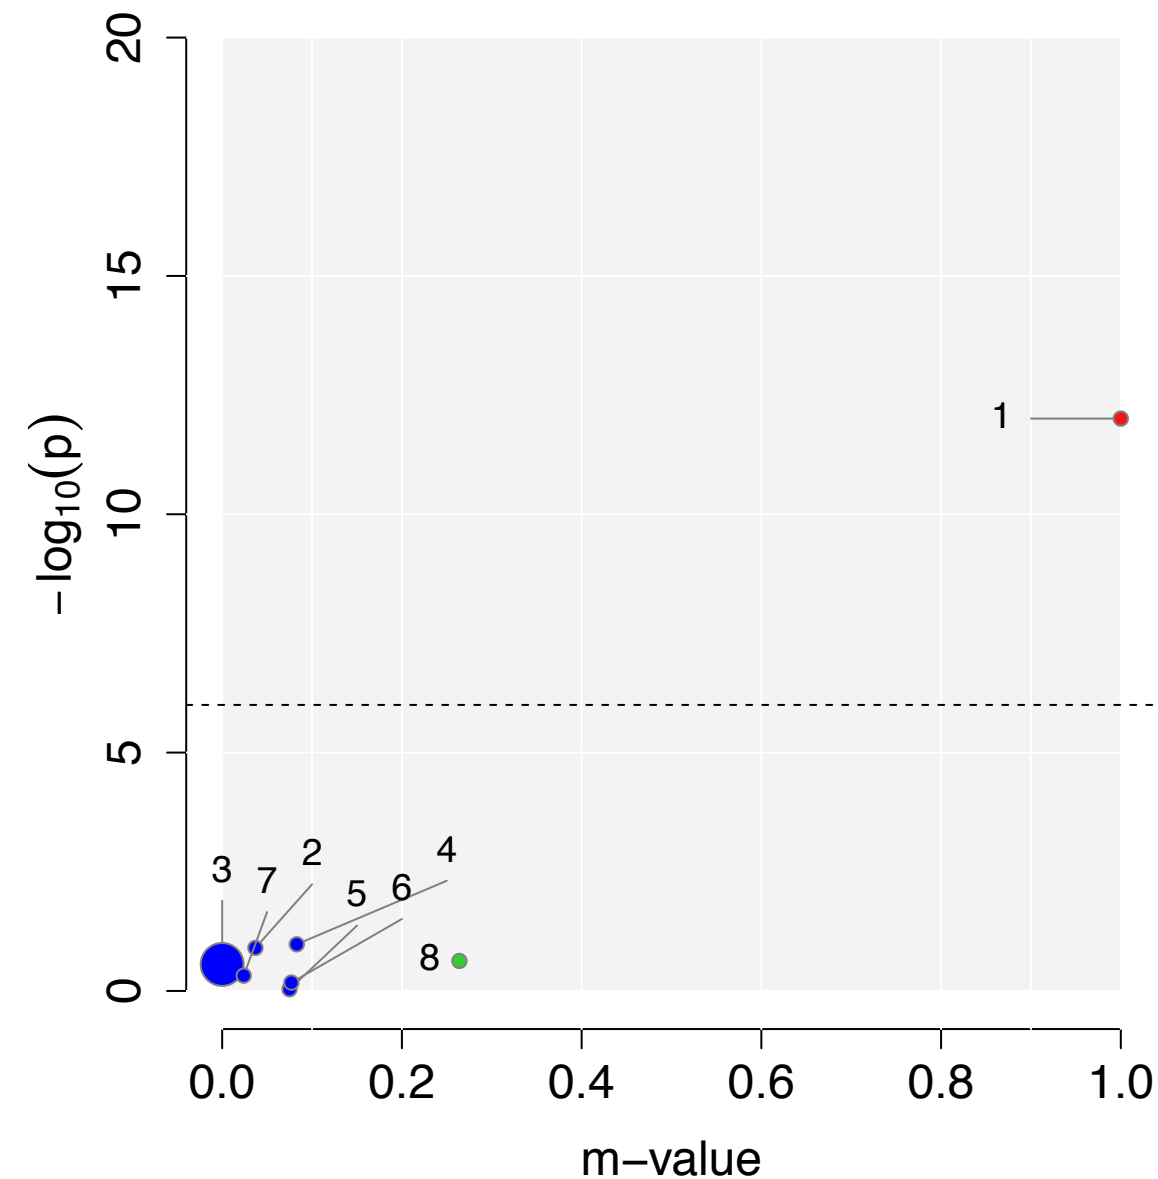

# rs35346733 (Meta $P = 7.71 \times 10^{-10}$ )

Gene : *CNTN4*

## GWAS P-value

- 2.47 x 10<sup>-10</sup> ● 1.SCZ
- 9.09 x 10<sup>-5</sup> ● 2.BIP
- 0.1652 ● 3.MD
- 0.7346 ● 4.ASD
- 0.4814 ● 5.ADHD
- 0.6099 ● 6.TS
- 0.6151 ● 7.ANO
- 0.2929 ● 8.OCD

FE summary

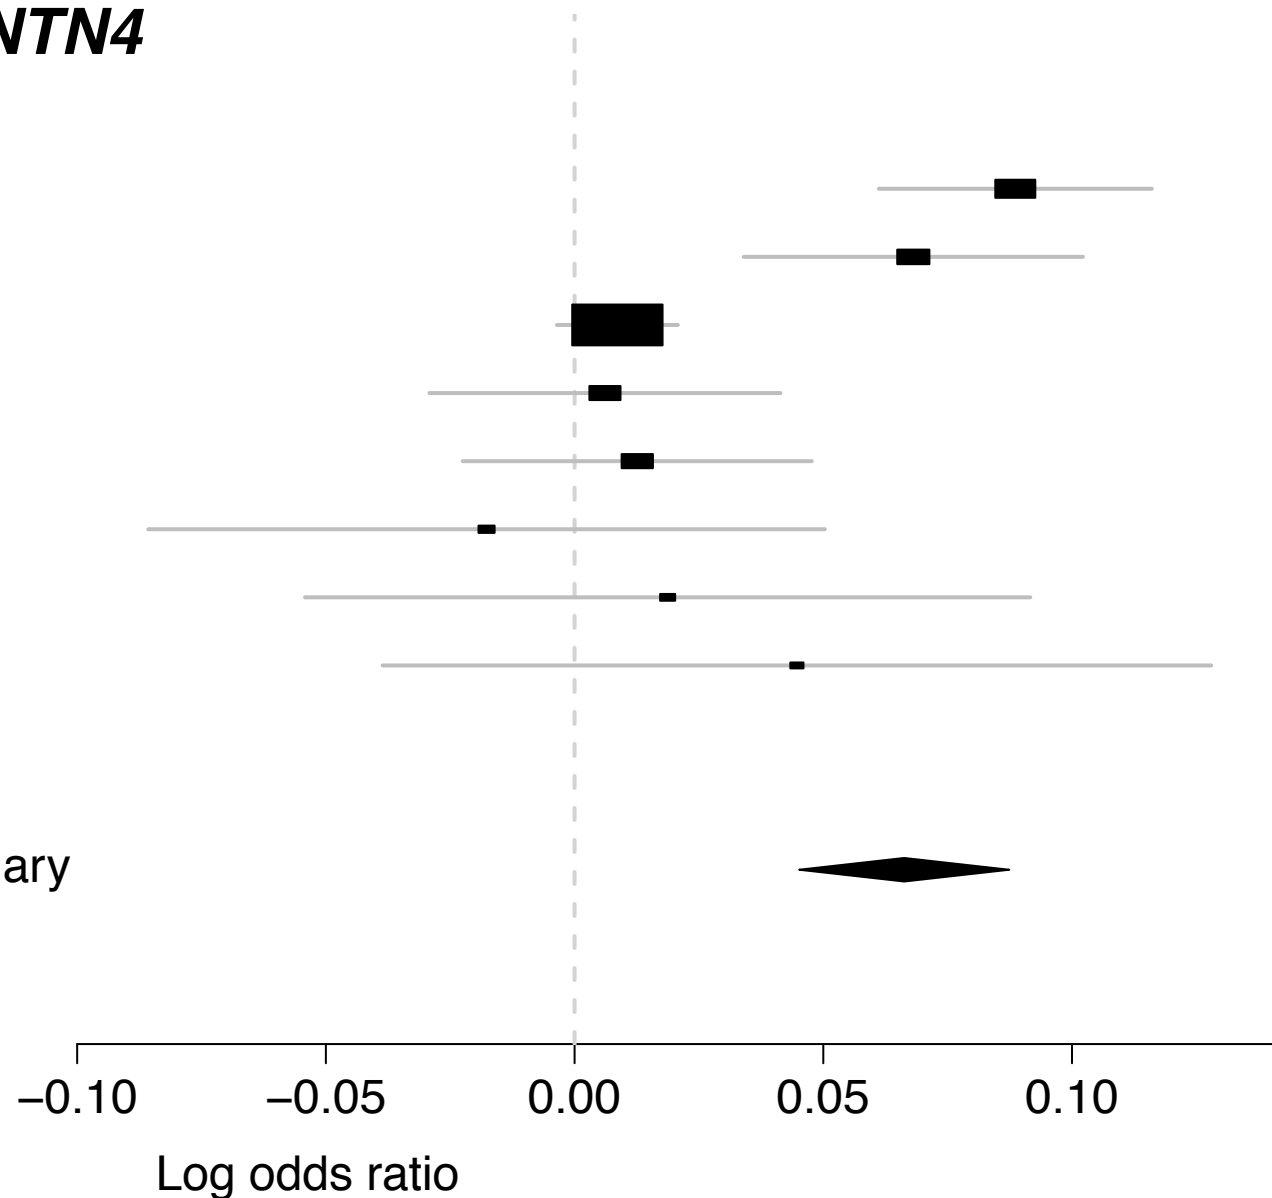

## PM-Plot

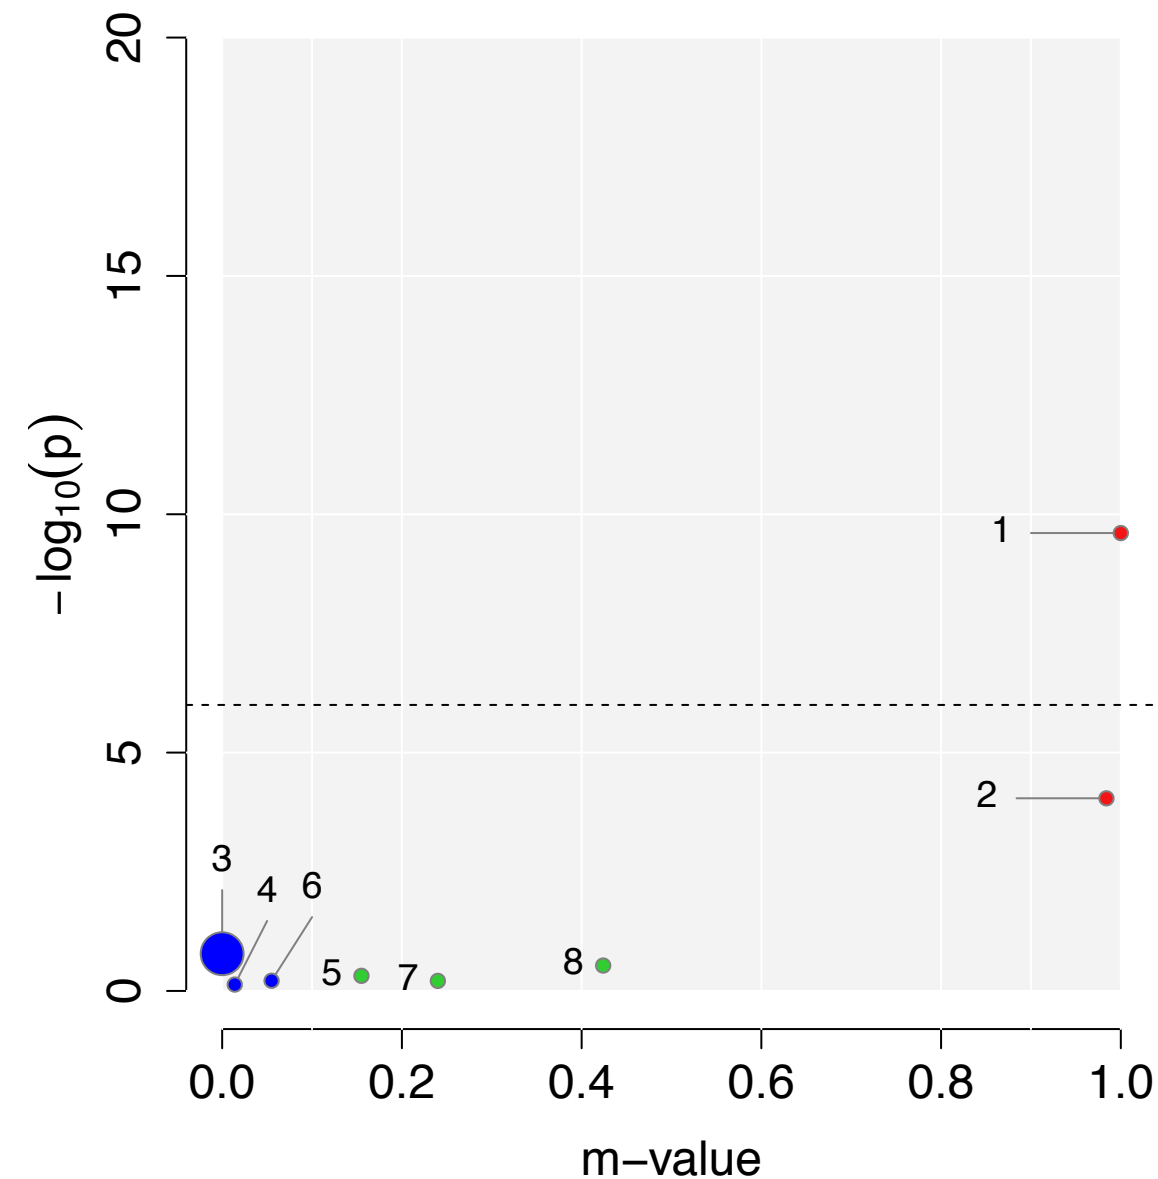

# rs35610290 (Meta $P = 1.54 \times 10^{-10}$ )

Gene : (>200kb)

## GWAS P-value

- 4.30 x 10<sup>-8</sup> ● 1.SCZ
- 3.62 x 10<sup>-7</sup> ● 2.BIP
- 0.2057 ● 3.MD
- 0.8646 ● 4.ASD
- 0.8898 ● 5.ADHD
- 0.7563 ● 6.TS
- 0.5839 ● 7.ANO
- 0.0436 ● 8.OCD

FE summary

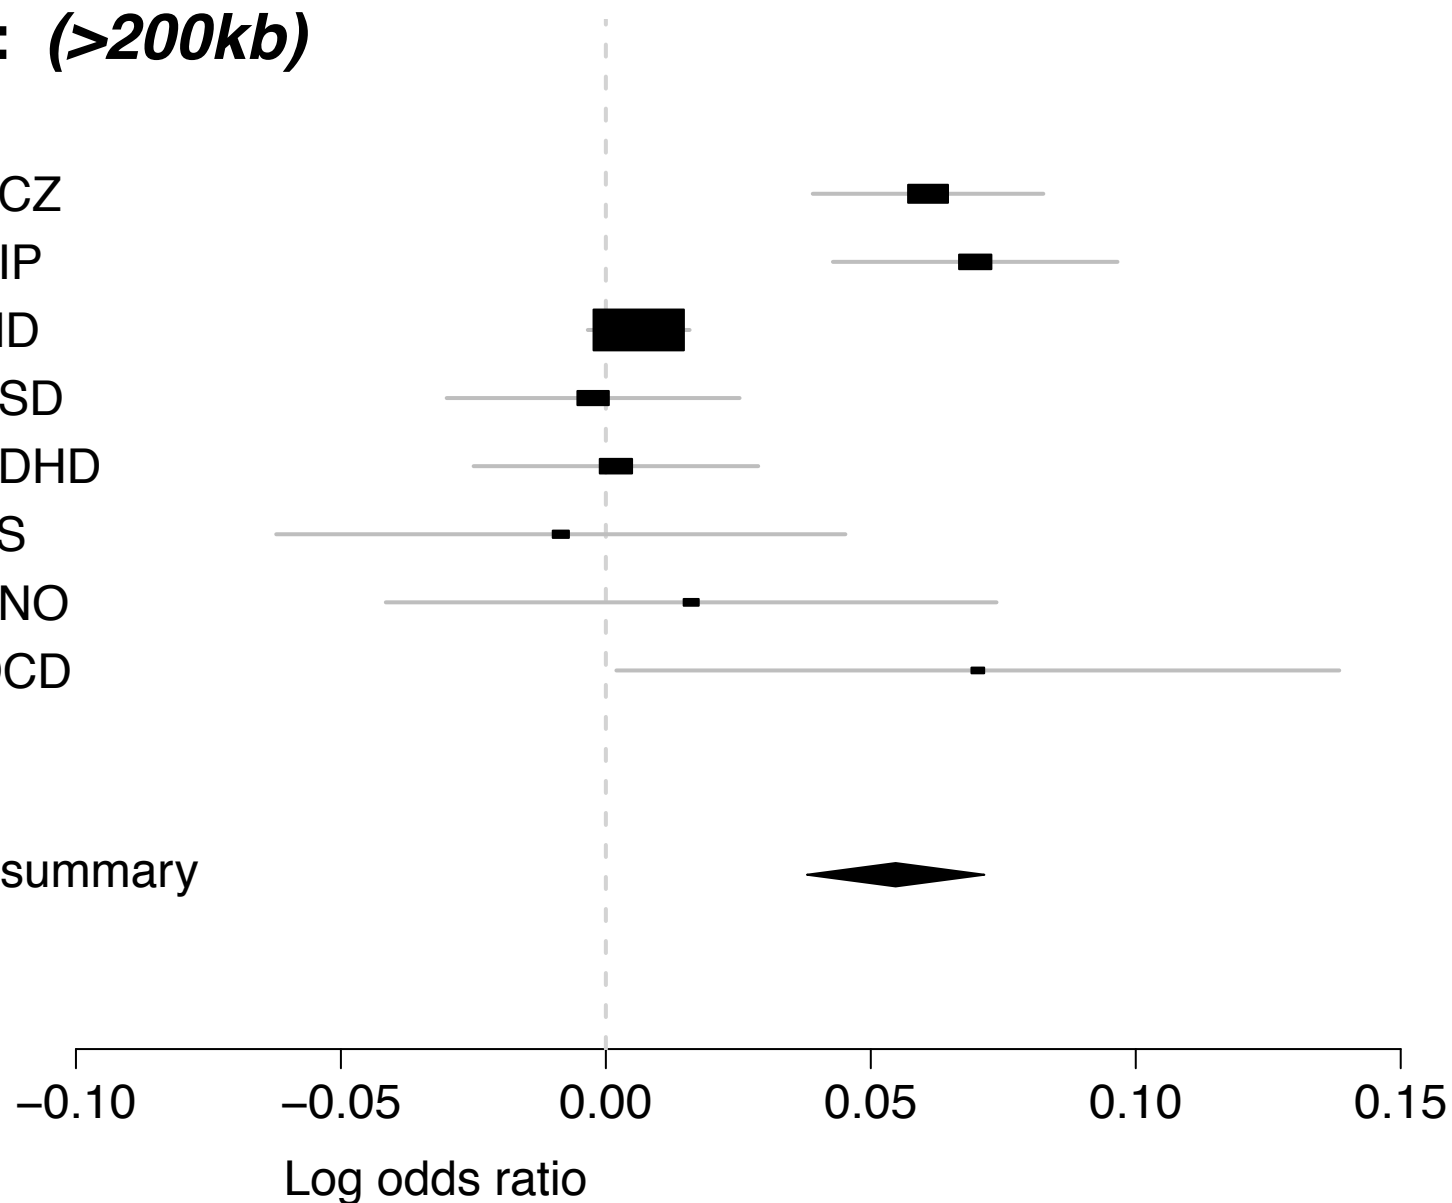

## PM-Plot

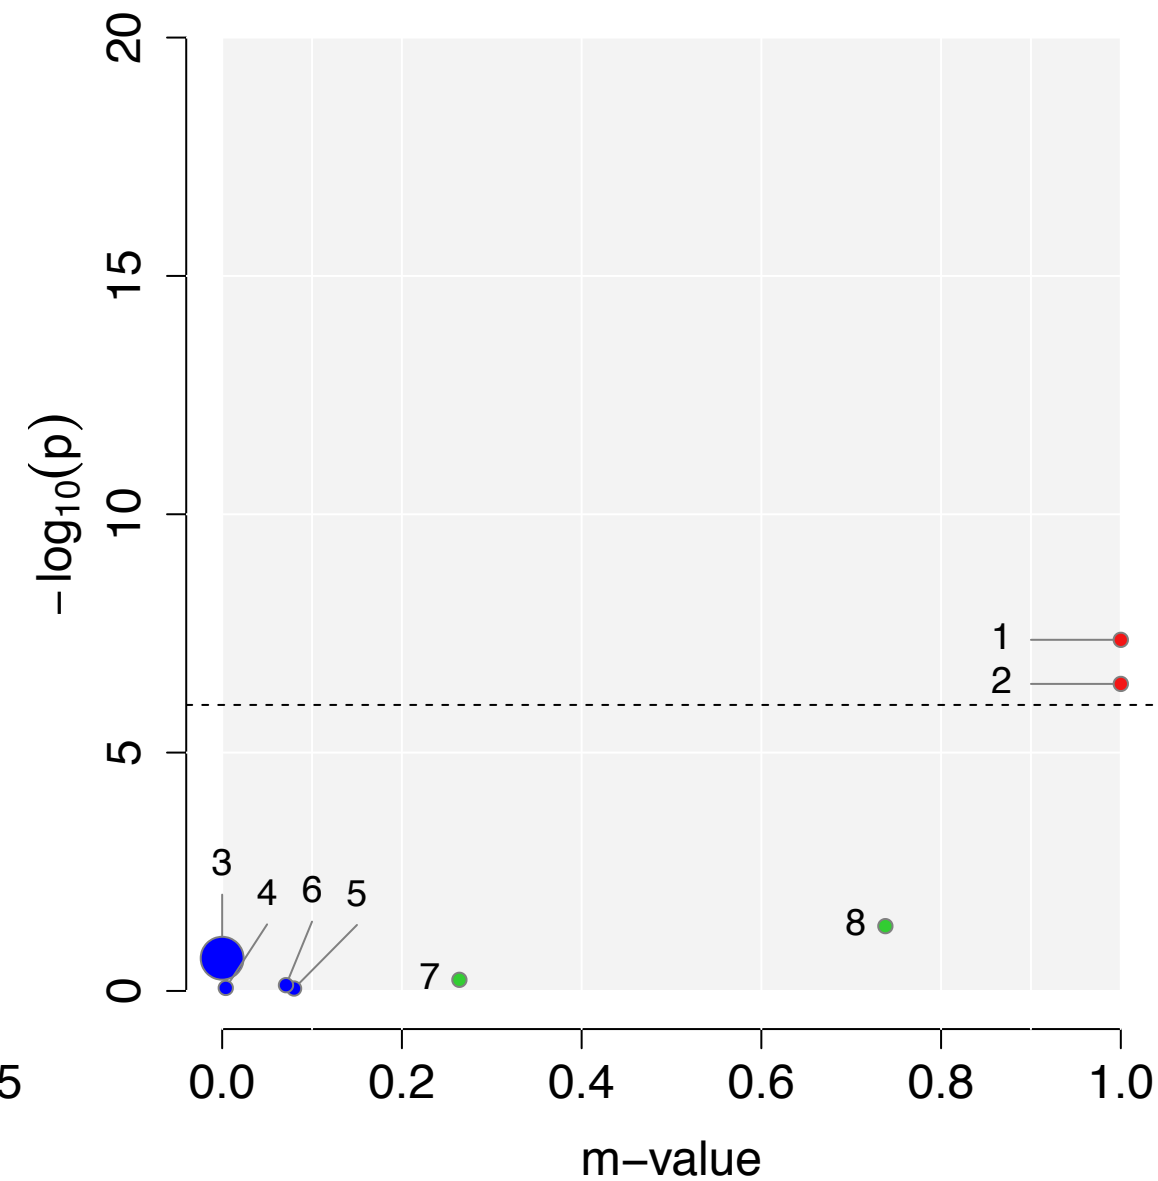

# rs35774874 (Meta $P = 1.84 \times 10^{-9}$ )

Gene : **SNX19**

## GWAS P-value

- $2.31 \times 10^{-9}$  ● 1.SCZ
- 0.0001 ● 2.BIP
- 0.2790 ● 3.MD
- 0.7939 ● 4.ASD
- 0.6302 ● 5.ADHD
- 0.5328 ● 6.TS
- 0.0502 ● 7.ANO
- 0.8650 ● 8.OCD

FE summary

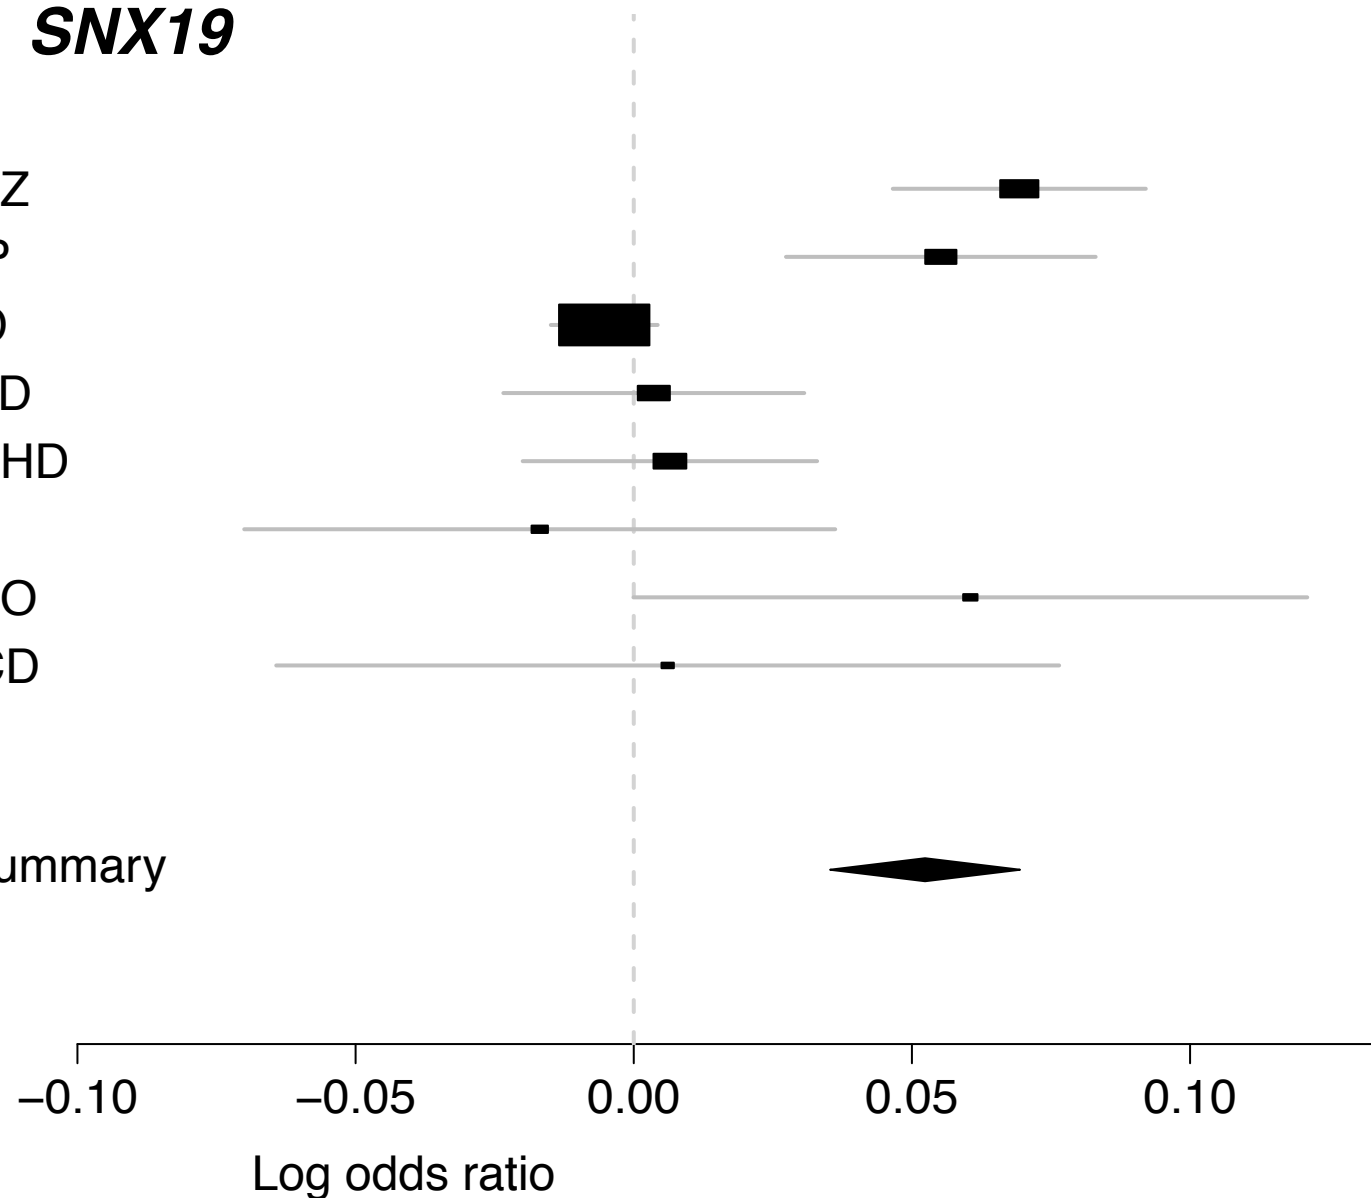

## PM-Plot

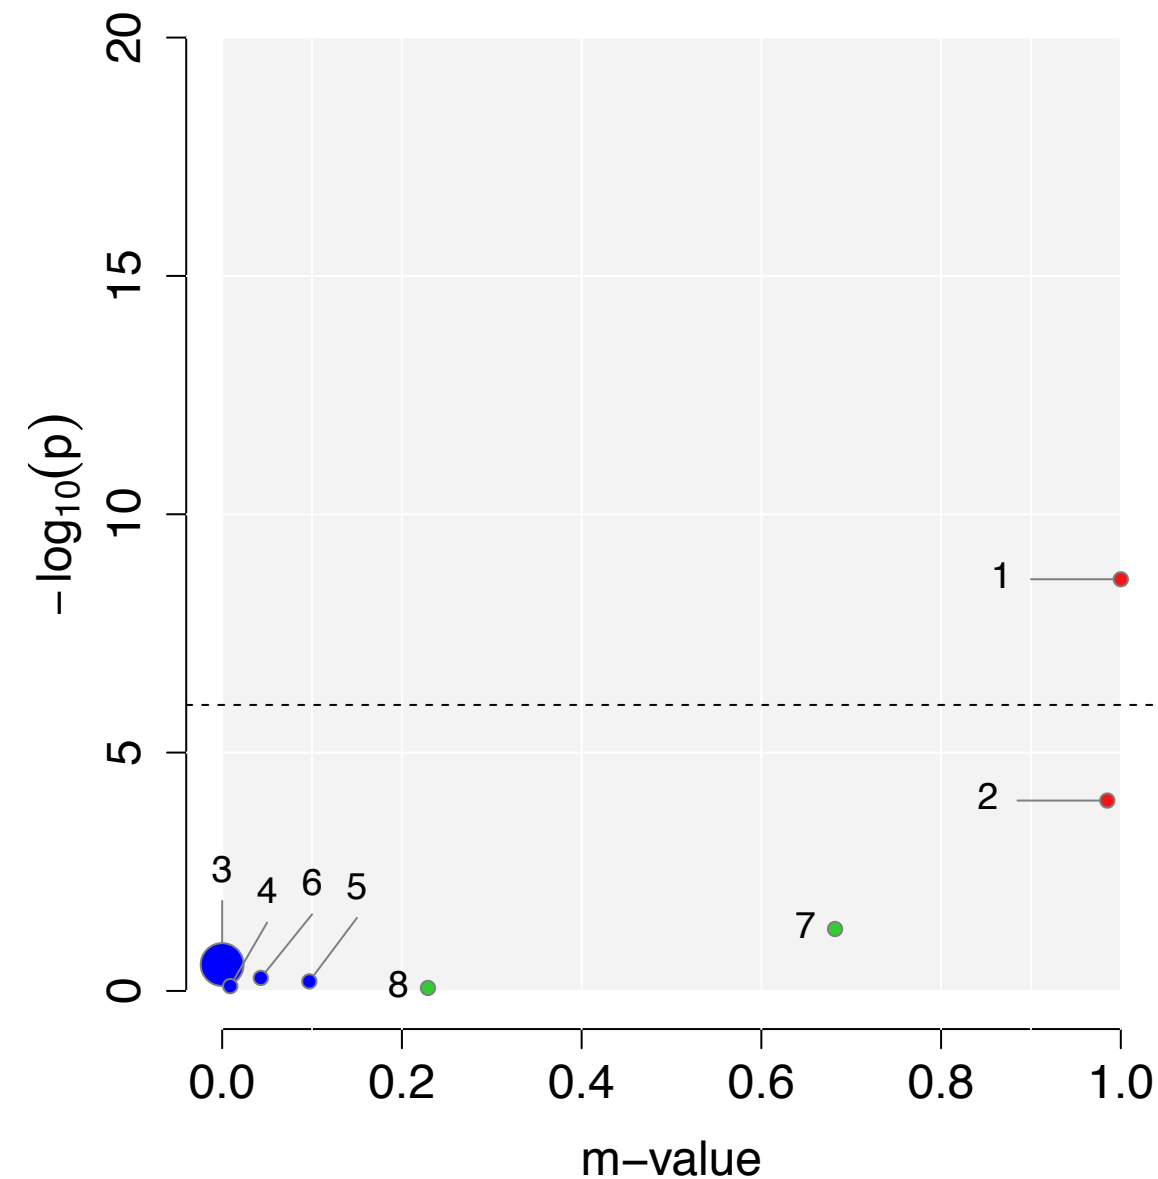

# rs36063234 (Meta $P = 5.11 \times 10^{-10}$ )

Gene : *NPAS3*

## GWAS P-value

- 0.9887 ● 1.SCZ
- $1.48 \times 10^{-5}$  ● 2.BIP
- 0.0052 ● 3.MD
- 0.0002 ● 4.ASD
- $3.40 \times 10^{-5}$  ● 5.ADHD
- 0.0020 ● 6.TS
- 0.8781 ● 7.ANO
- 0.3821 ● 8.OCD

FE summary

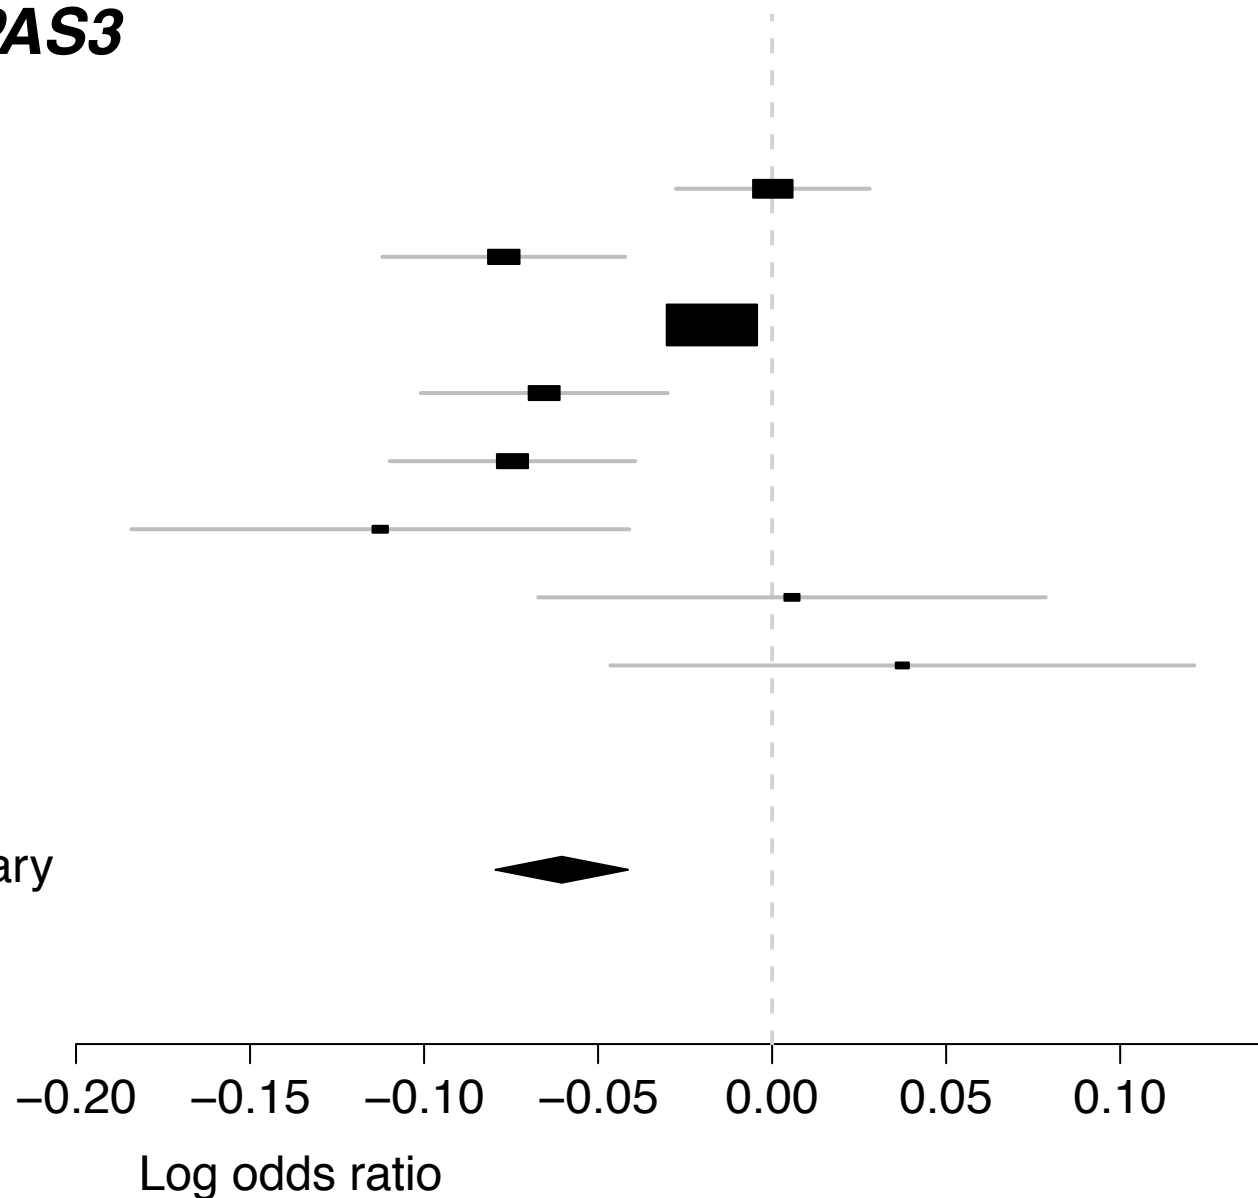

## PM-Plot

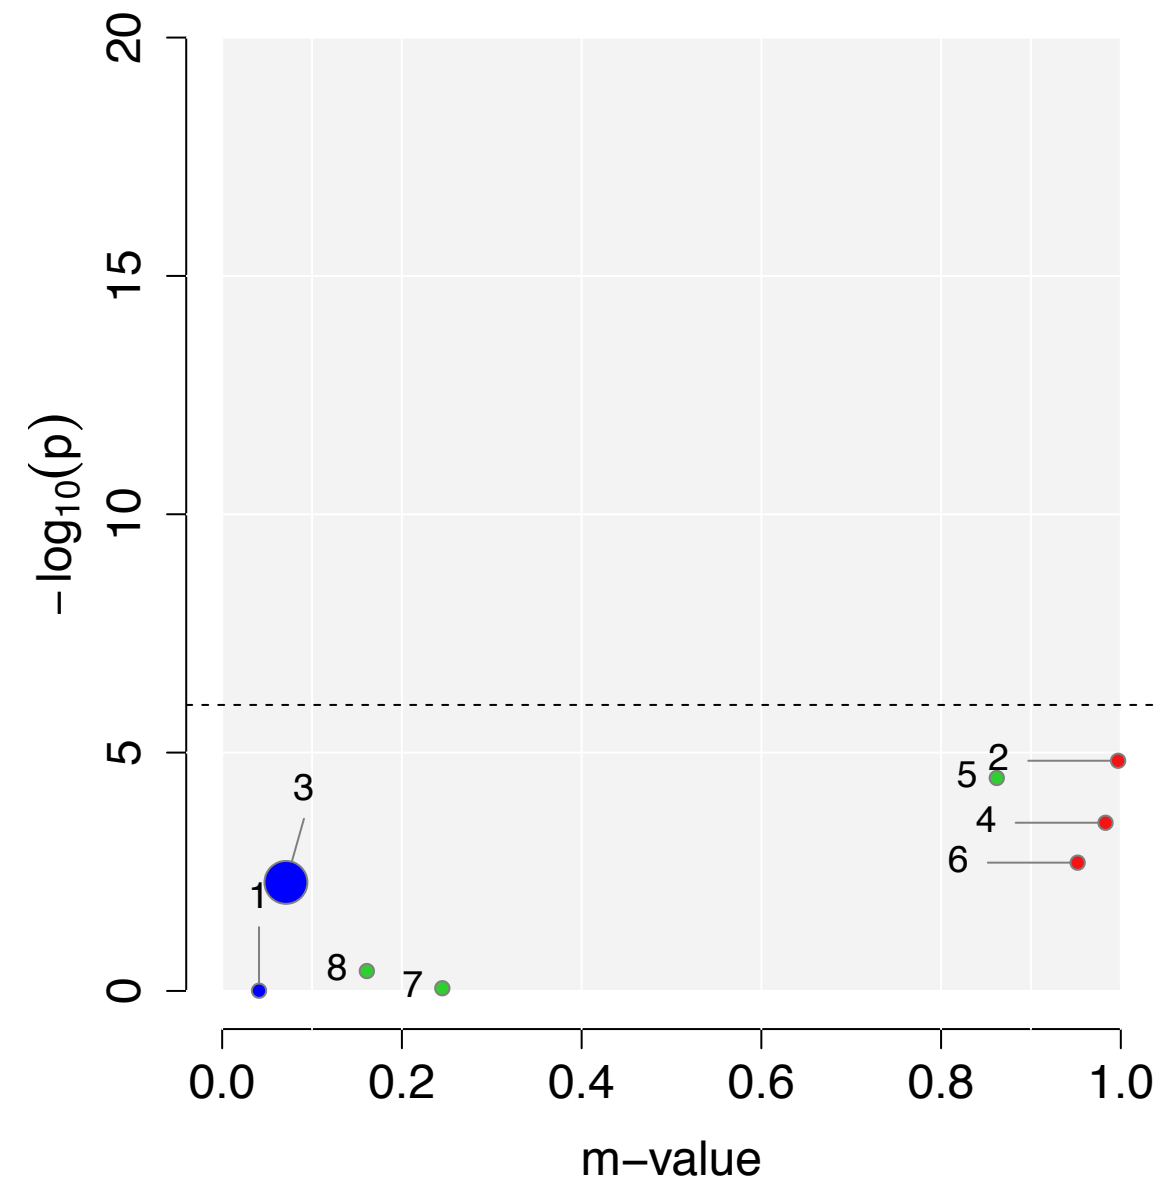

# rs55648125 (Meta $P = 8.74 \times 10^{-9}$ )

Gene : *TFAP2B*, *TFAP2D*

## GWAS P-value

- 0.0007 ● 1.SCZ
- $5.14 \times 10^{-8}$  ● 2.BIP
- 0.0990 ● 3.MD
- 0.0019 ● 4.ASD
- 0.0037 ● 5.ADHD
- 0.7638 ● 6.TS
- 0.1441 ● 7.ANO
- 0.8040 ● 8.OCD

FE summary

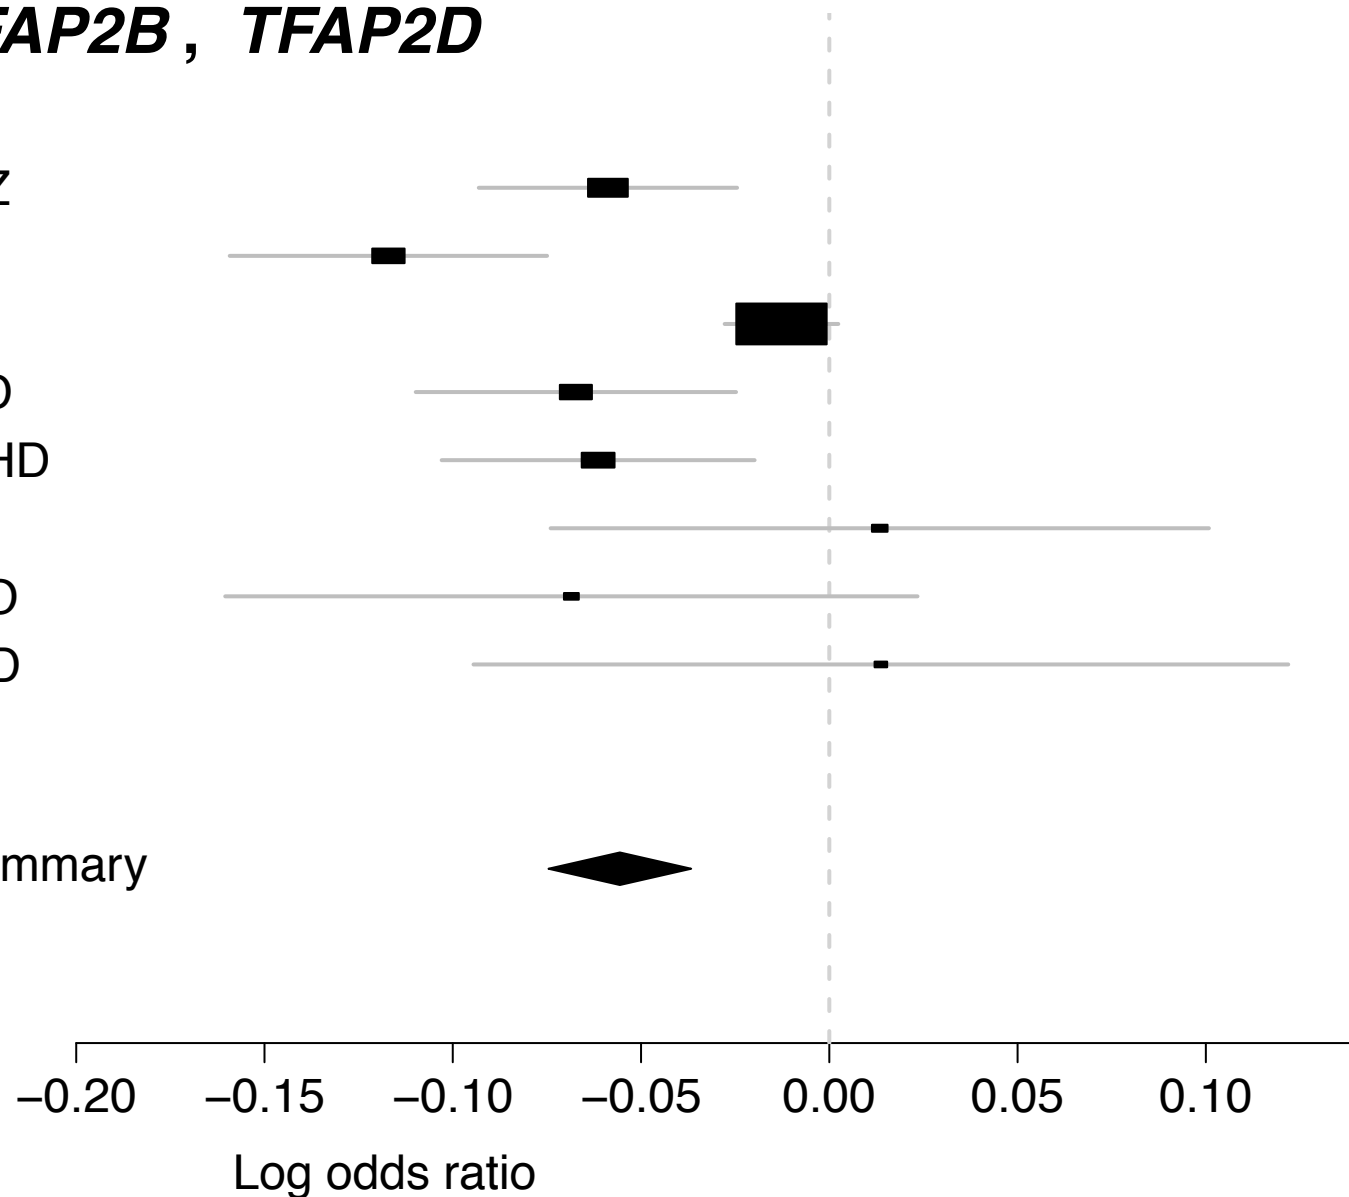

## PM-Plot

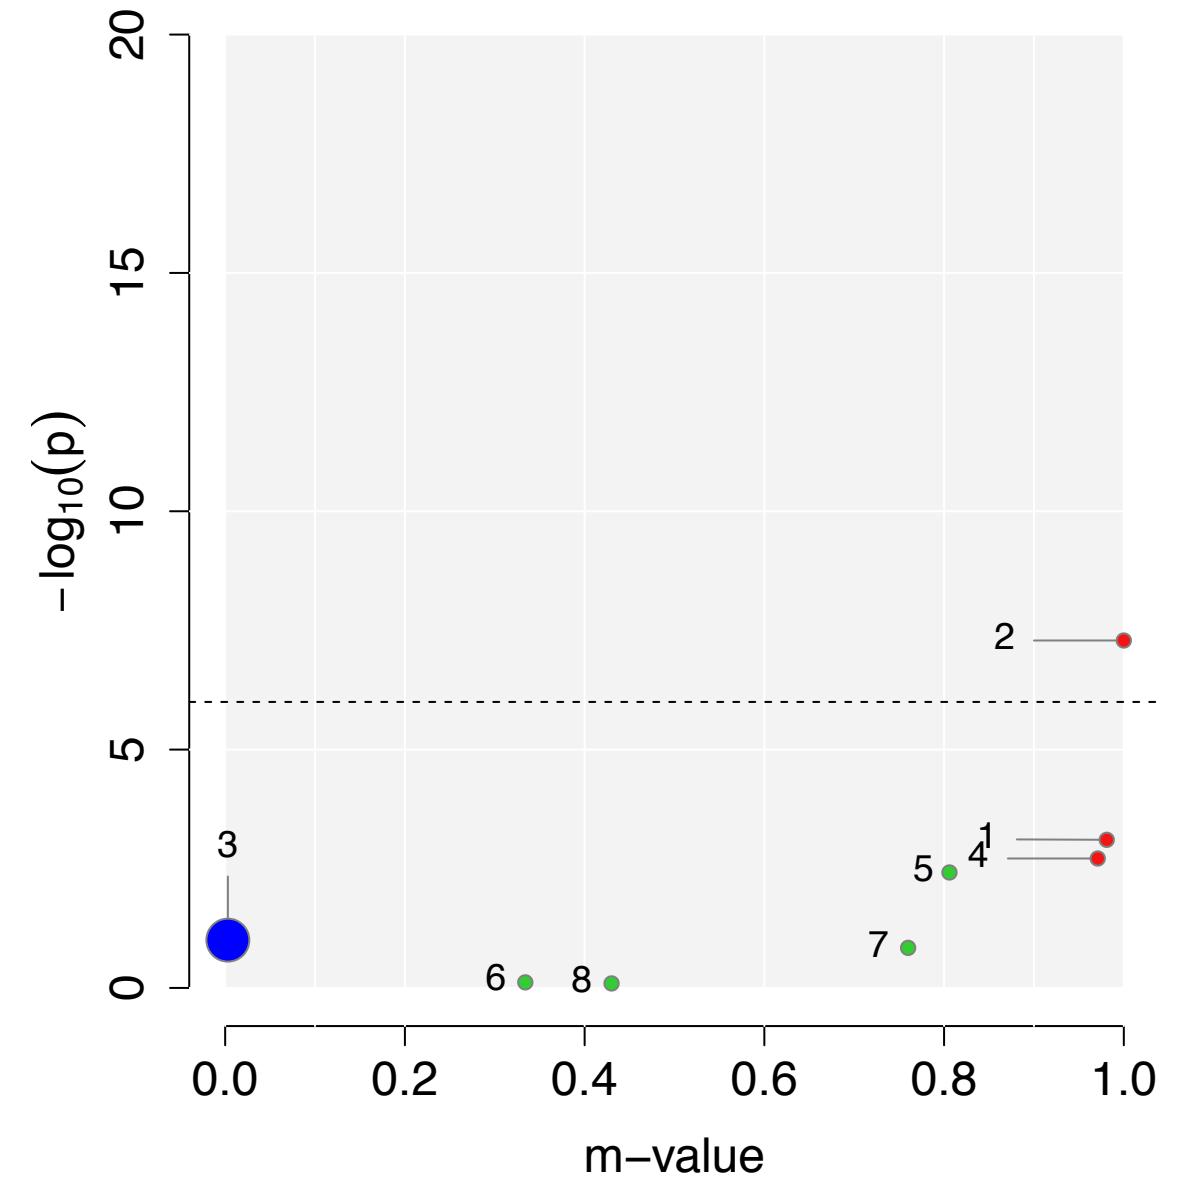

rs55661361 (Meta  $P = 2.02 \times 10^{-11}$ )

Gene : *NRGN*, *VSIG2*

GWAS P-value

- 1.09 x 10<sup>-11</sup> ● 1.SCZ
- 0.1372 ● 2.BIP
- 0.2241 ● 3.MD
- 0.0011 ● 4.ASD
- 0.0551 ● 5.ADHD
- 0.7894 ● 6.TS
- 0.9711 ● 7.ANO
- 0.2651 ● 8.OCD

FE summary

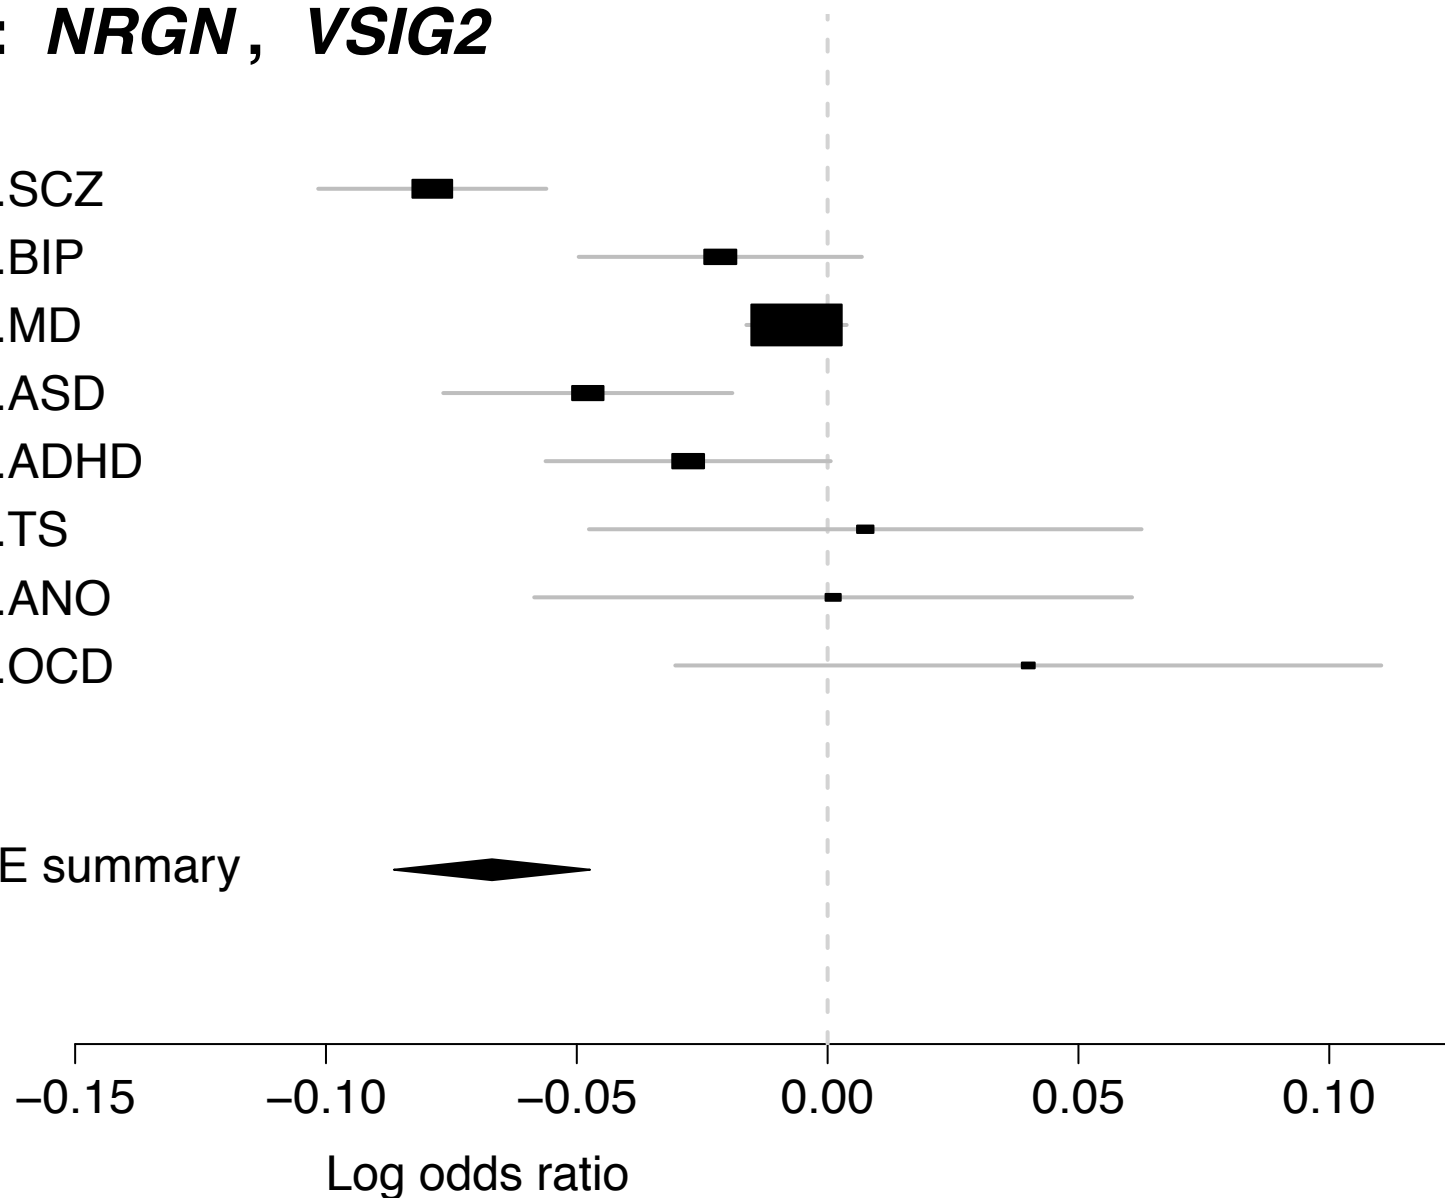

PM-Plot

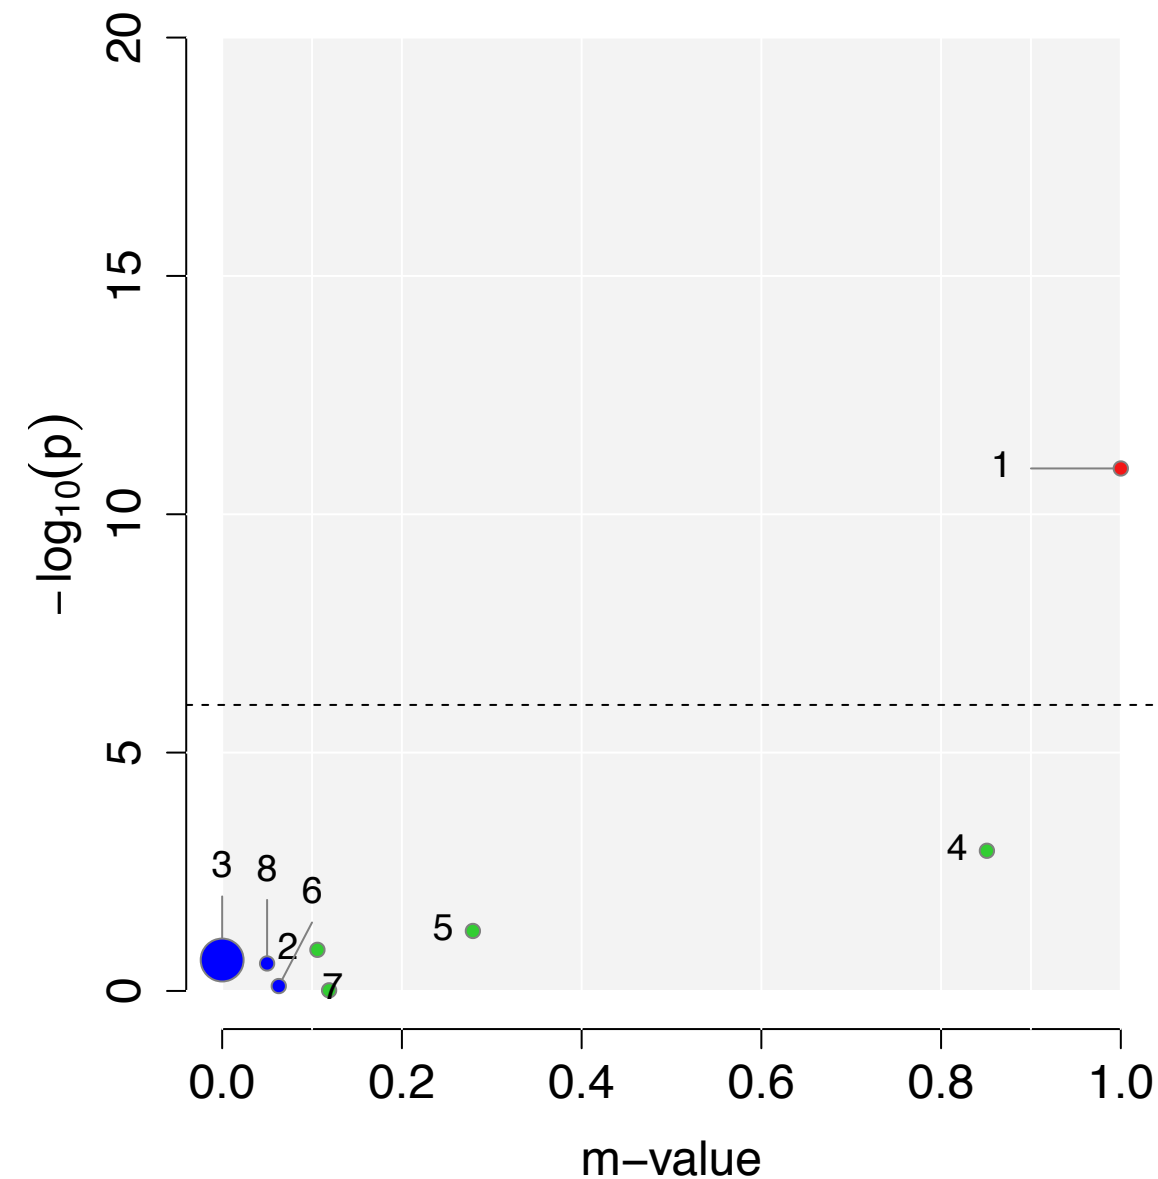



rs58235352 (Meta  $P = 4.71 \times 10^{-8}$ )

Gene : *ACADS*, *SPPL3*

GWAS P-value

- 0.0798 ● 1.SCZ
- 0.0015 ● 2.BIP
- $1.26 \times 10^{-7}$  ● 3.MD
- 0.1157 ● 4.ASD
- 0.6739 ● 5.ADHD
- 0.1084 ● 6.TS
- 0.2321 ● 7.ANO
- 0.8092 ● 8.OCD

FE summary

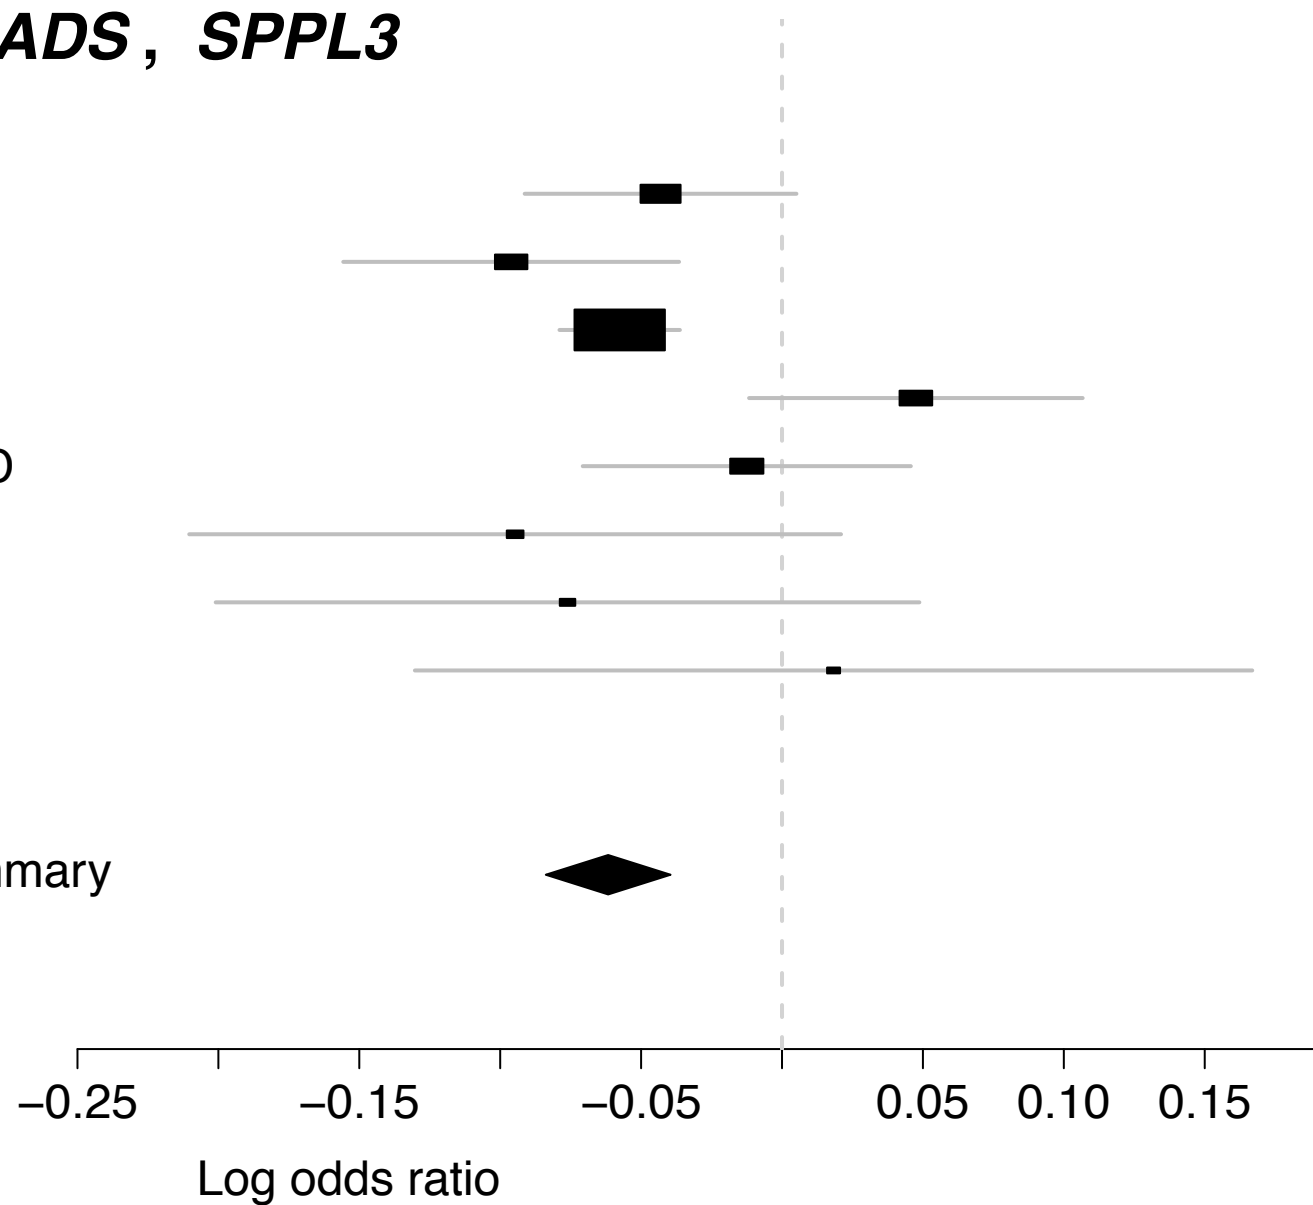

PM-Plot

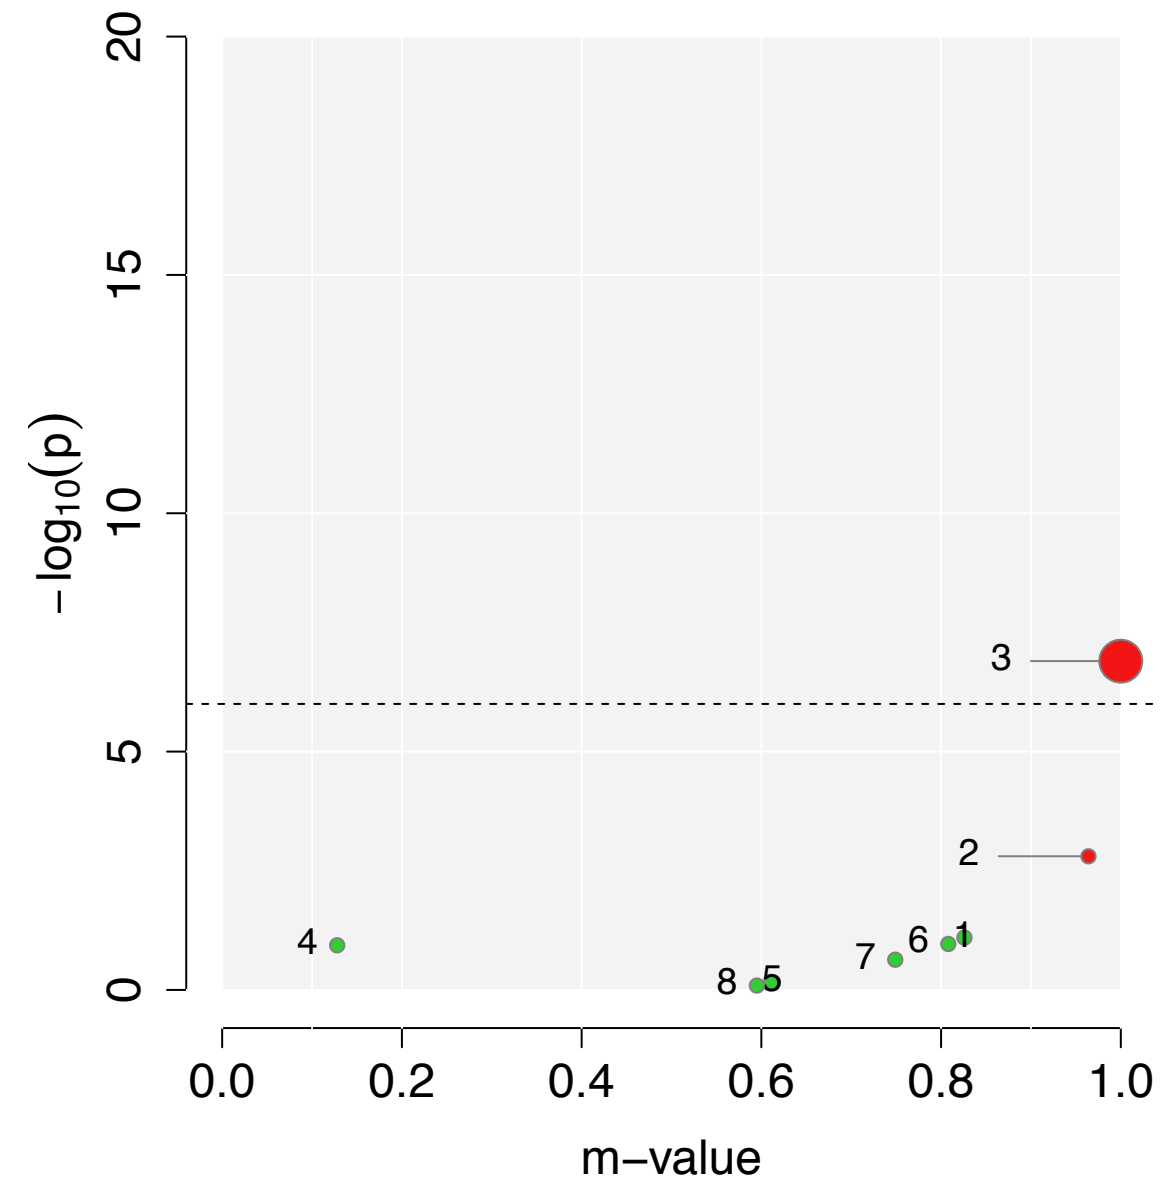

# rs59979824 (Meta $P = 4.46 \times 10^{-9}$ )

Gene : (>200kb)

## GWAS P-value

- 2.42 x 10<sup>-9</sup> ● 1.SCZ
- 0.0001 ● 2.BIP
- 0.8474 ● 3.MD
- 0.1483 ● 4.ASD
- 0.6421 ● 5.ADHD
- 0.7556 ● 6.TS
- 0.0812 ● 7.ANO
- 0.5112 ● 8.OCD

FE summary

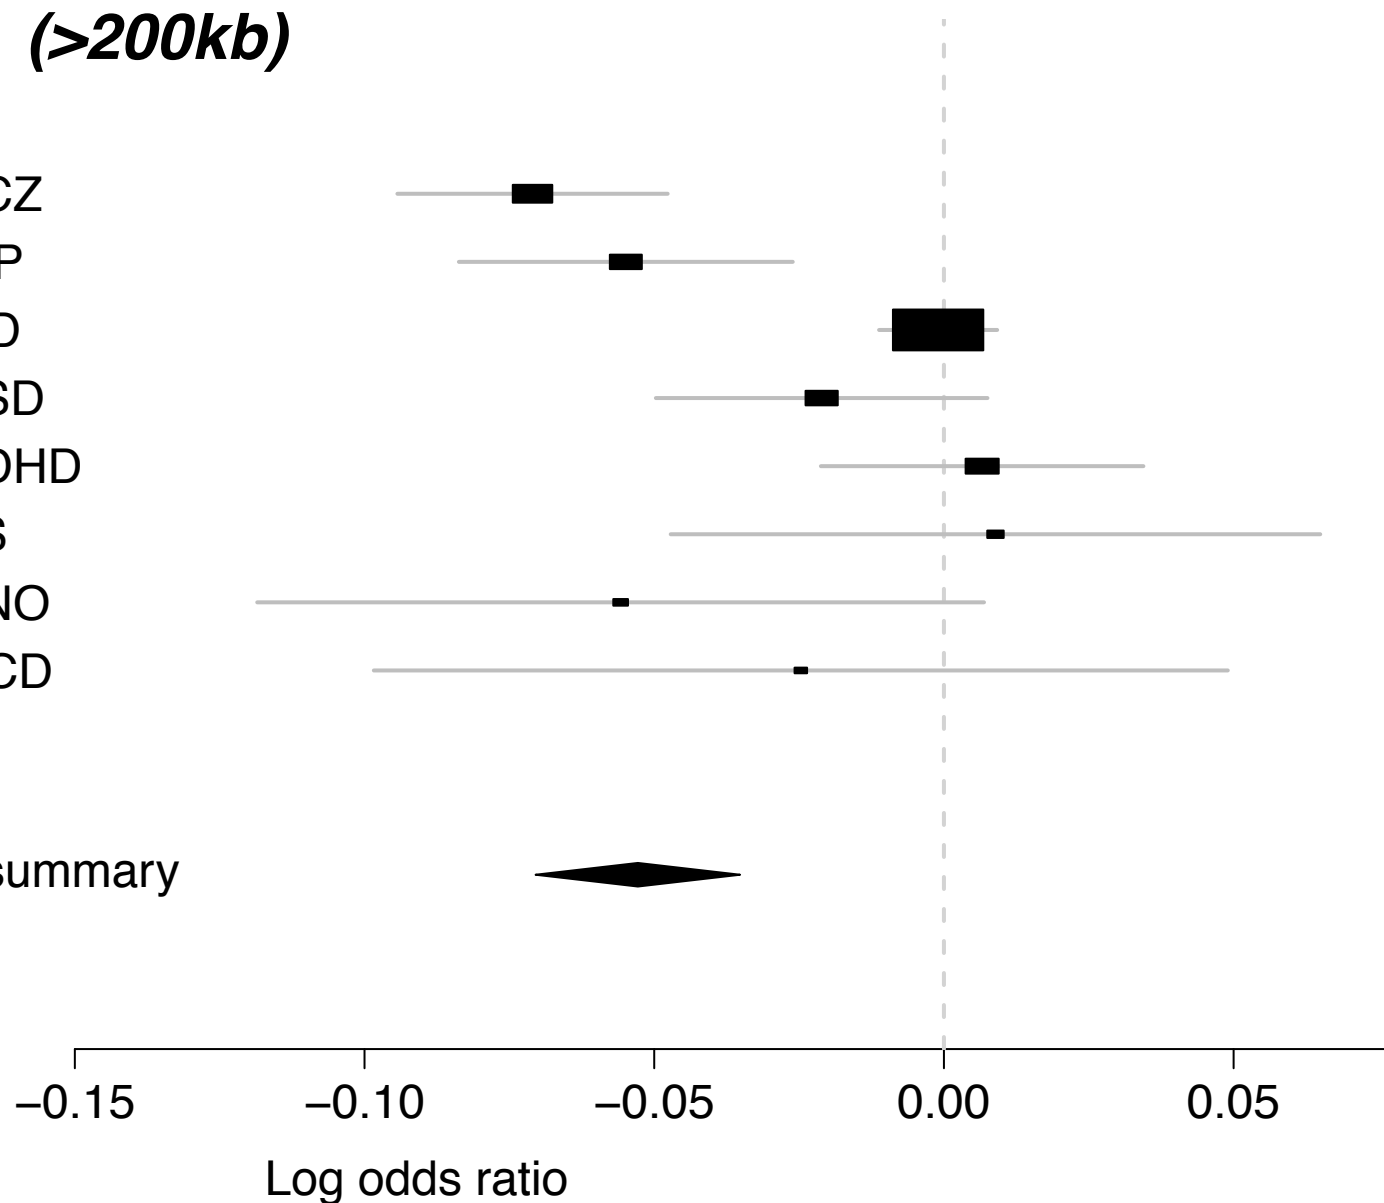

## PM-Plot

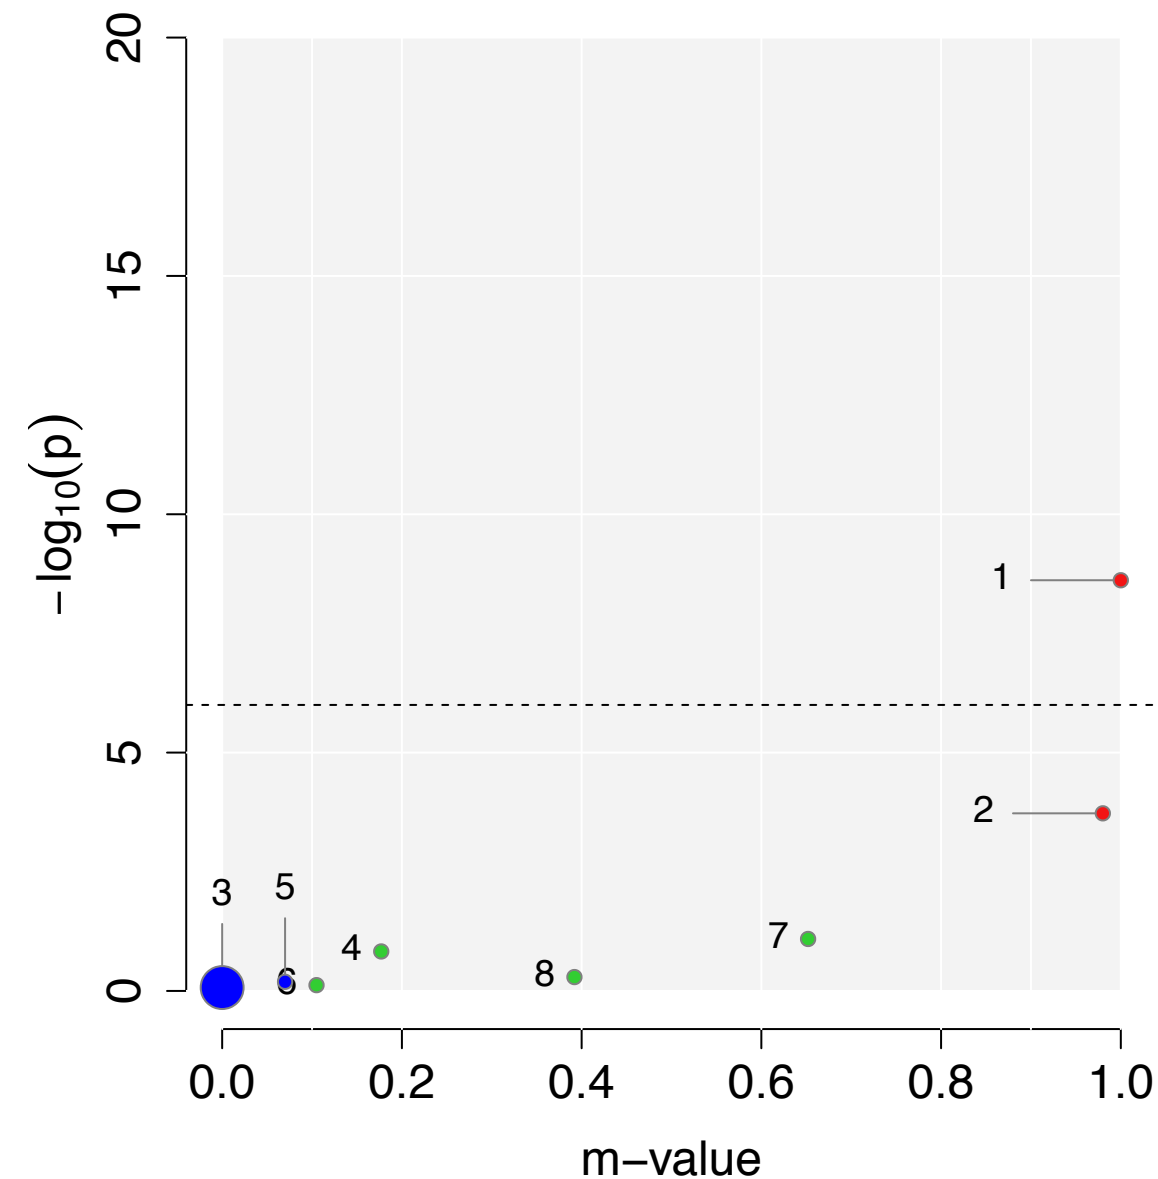

# rs61867293 (Meta $P = 7.81 \times 10^{-15}$ )

Gene : **SORCS3**

## GWAS P-value

- 4.96 x 10<sup>-6</sup> ● 1.SCZ
- 0.0073 ● 2.BIP
- 8.71 x 10<sup>-10</sup> ● 3.MD
- 0.0029 ● 4.ASD
- 1.95 x 10<sup>-7</sup> ● 5.ADHD
- 0.3855 ● 6.TS
- 0.0321 ● 7.ANO
- 0.6997 ● 8.OCD

FE summary

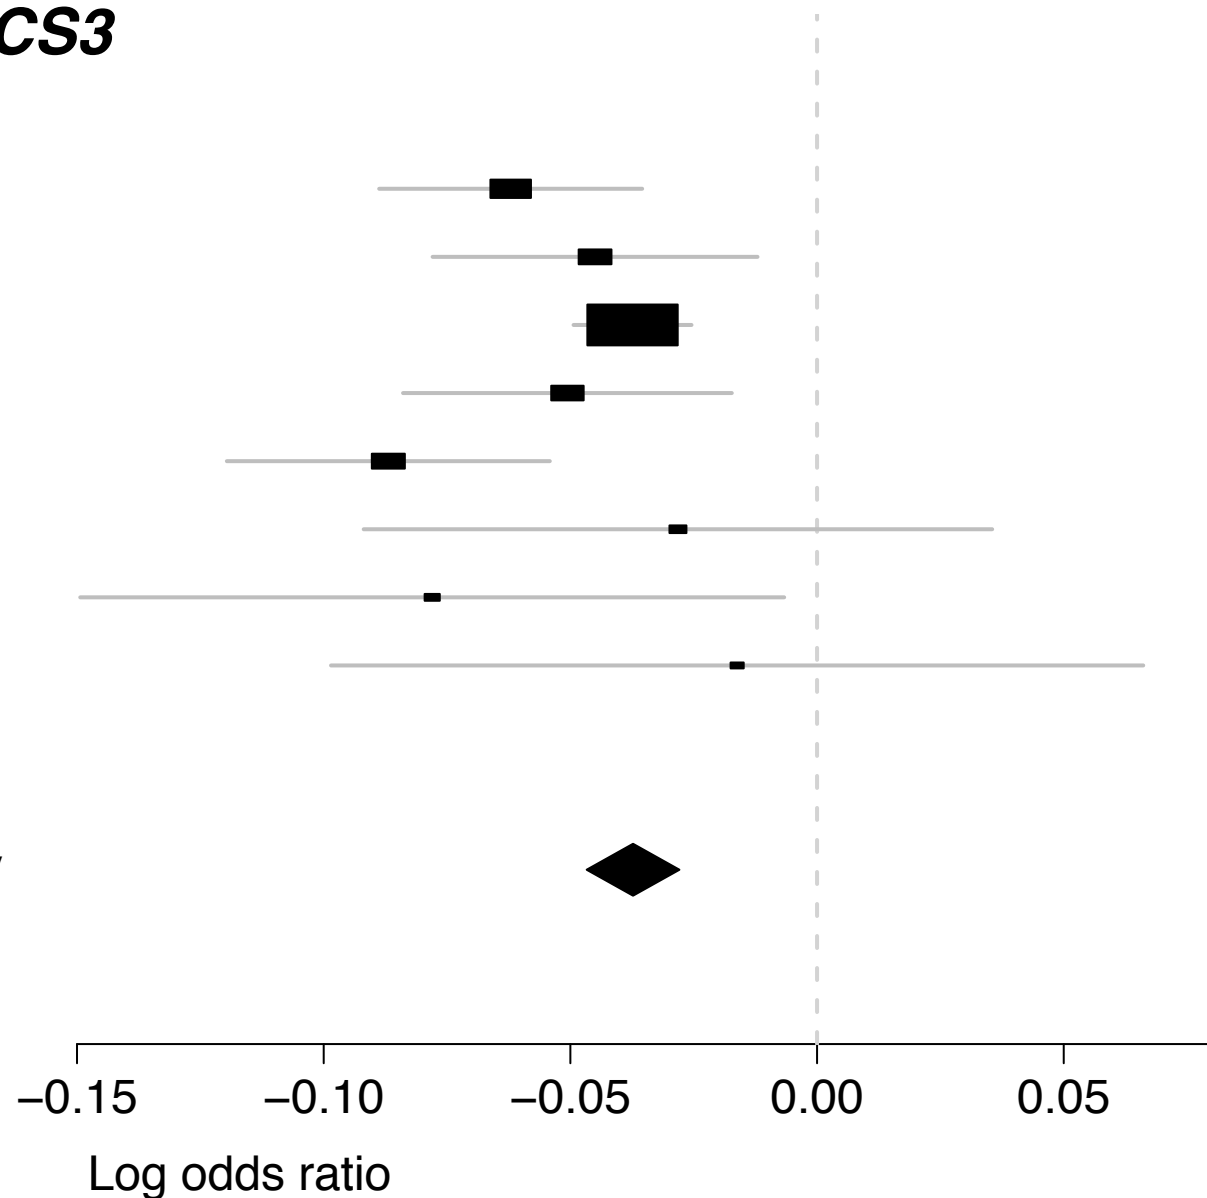

## PM-Plot

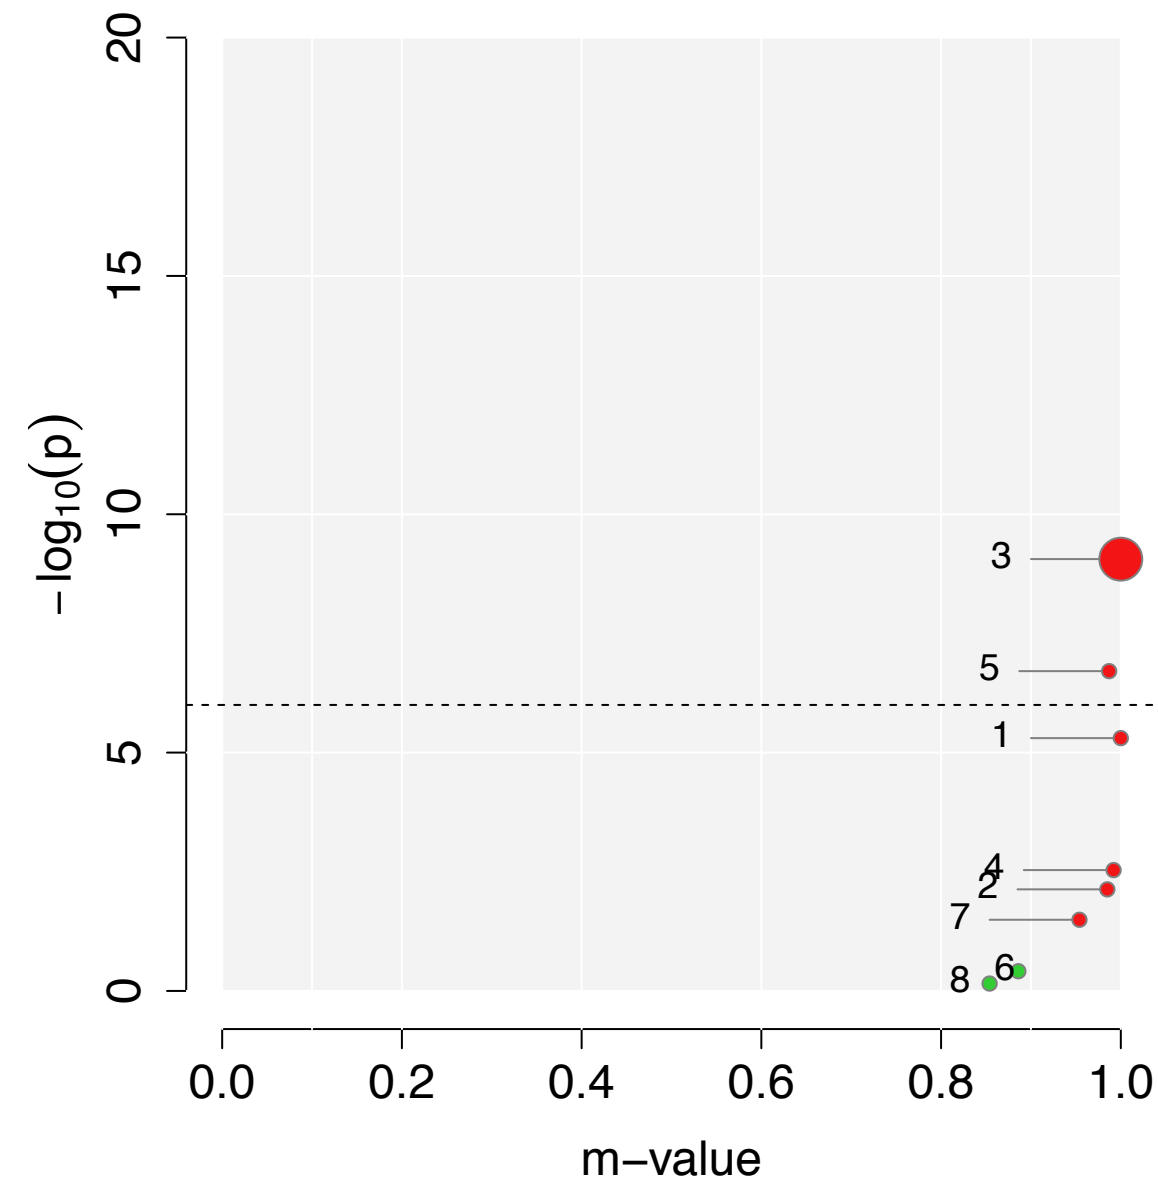

# rs61882743 (Meta $P = 1.15 \times 10^{-8}$ )

Gene : *AMBRA1*, *HARBI1*

## GWAS P-value

- 2.71 x 10<sup>-10</sup> ● 1.SCZ
- 0.2932 ● 2.BIP
- 0.0439 ● 3.MD
- 0.1328 ● 4.ASD
- 0.0070 ● 5.ADHD
- 0.7089 ● 6.TS
- 0.1963 ● 7.ANO
- 0.7055 ● 8.OCD

FE summary

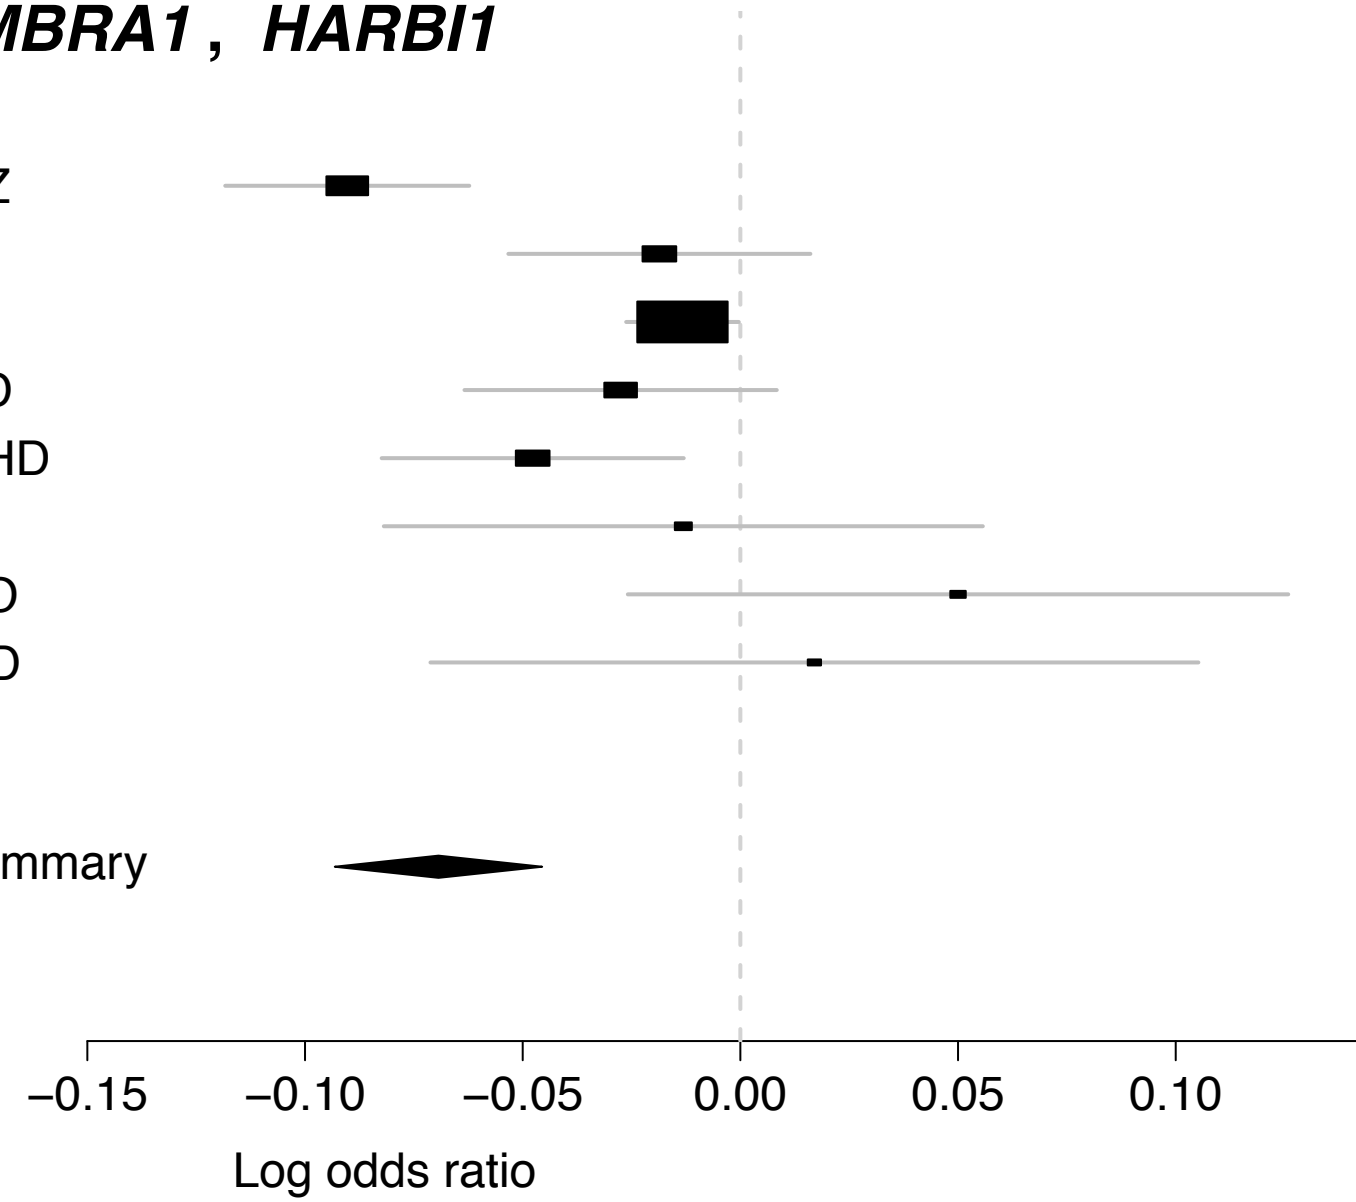

## PM-Plot

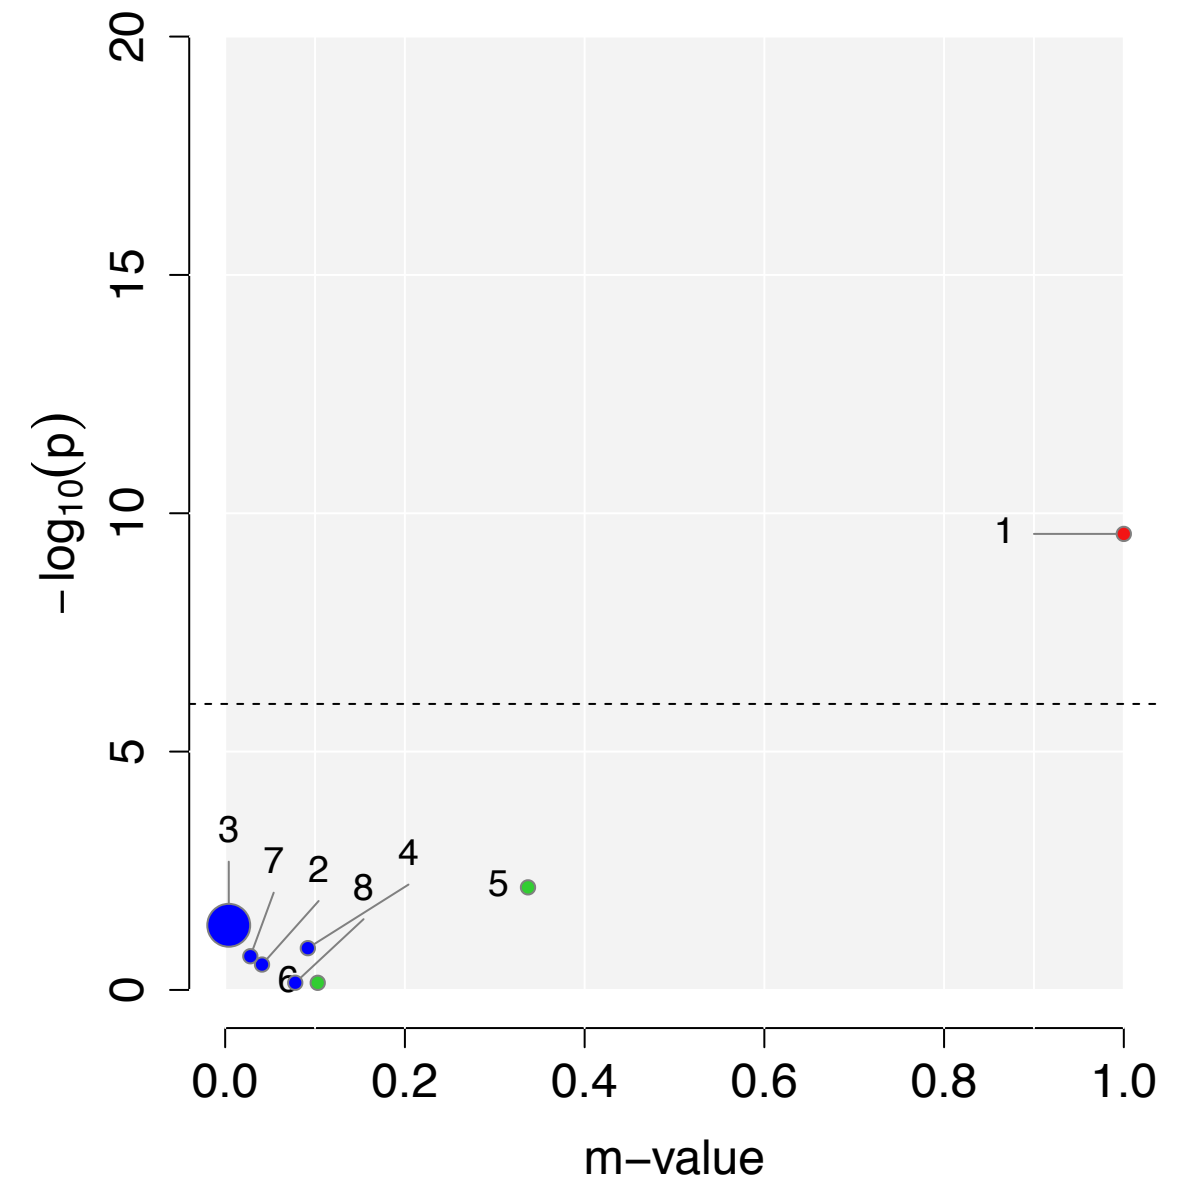

# rs62526783 (Meta $P = 2.34 \times 10^{-8}$ )

Gene : (>200kb)

## GWAS P-value

- 1.18 x 10<sup>-9</sup> ● 1.SCZ
- 0.0144 ● 2.BIP
- 0.3088 ● 3.MD
- 0.0132 ● 4.ASD
- 0.4150 ● 5.ADHD
- 0.5069 ● 6.TS
- 0.8647 ● 7.ANO
- 0.1750 ● 8.OCD

FE summary

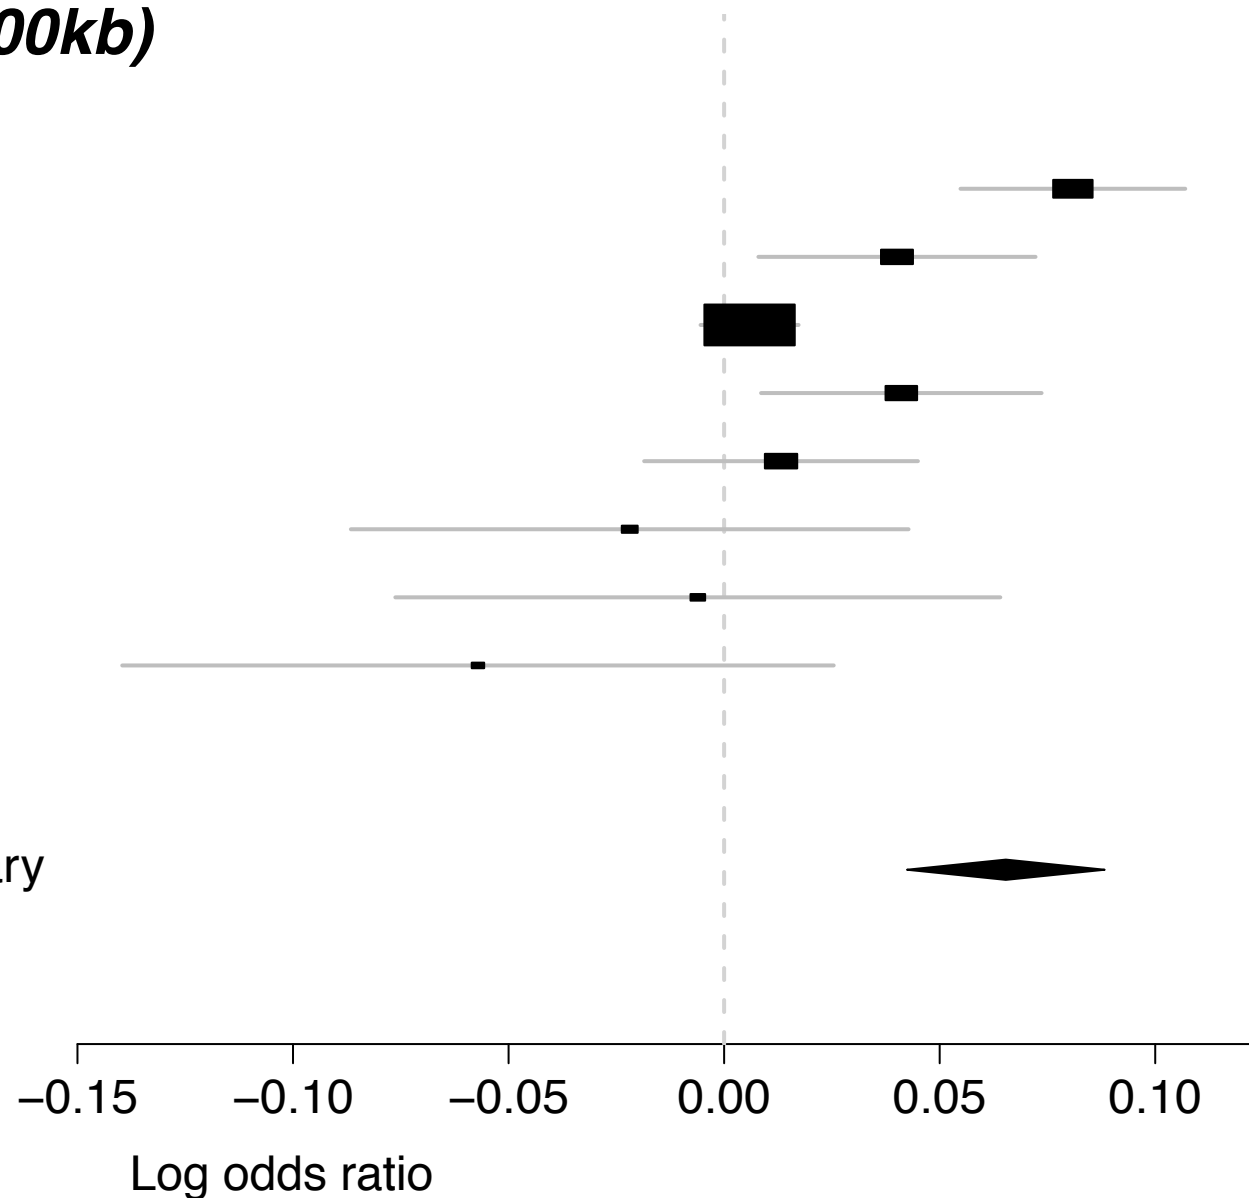

## PM-Plot

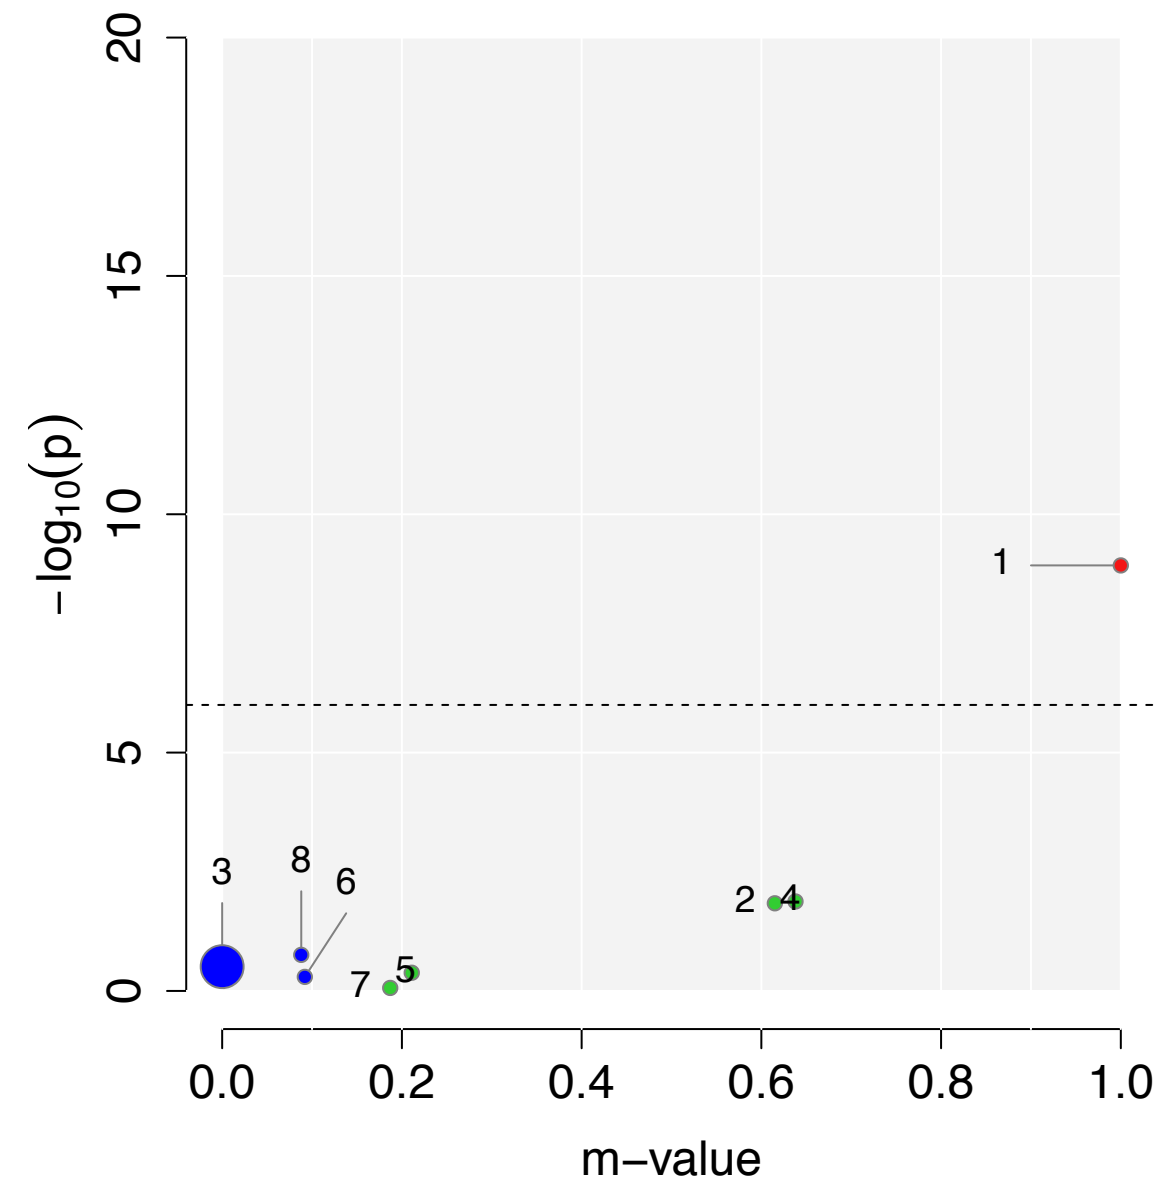

# rs71395455 (Meta $P = 5.43 \times 10^{-14}$ )

Gene : **ZSCAN2**, **WDR73**

## GWAS P-value

- $2.30 \times 10^{-9}$  ● 1.SCZ
- $1.87 \times 10^{-8}$  ● 2.BIP
- 0.0079 ● 3.MD
- 0.0007 ● 4.ASD
- 0.4803 ● 5.ADHD
- 0.4105 ● 6.TS
- 0.9922 ● 7.ANO
- 0.9341 ● 8.OCD

FE summary

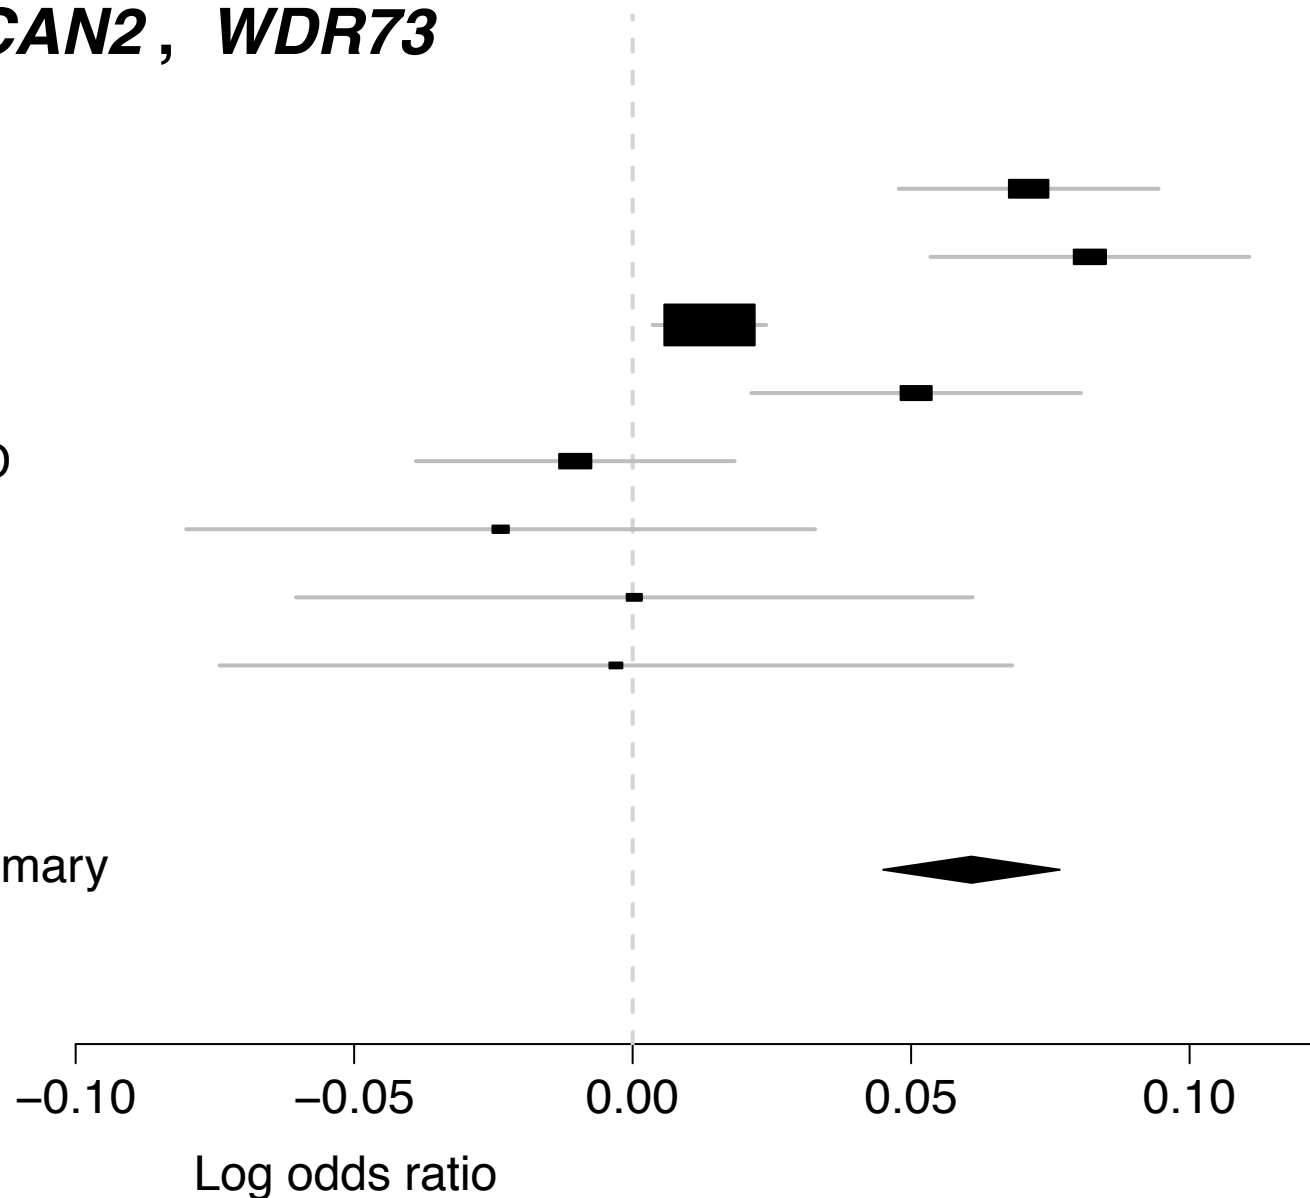

## PM-Plot

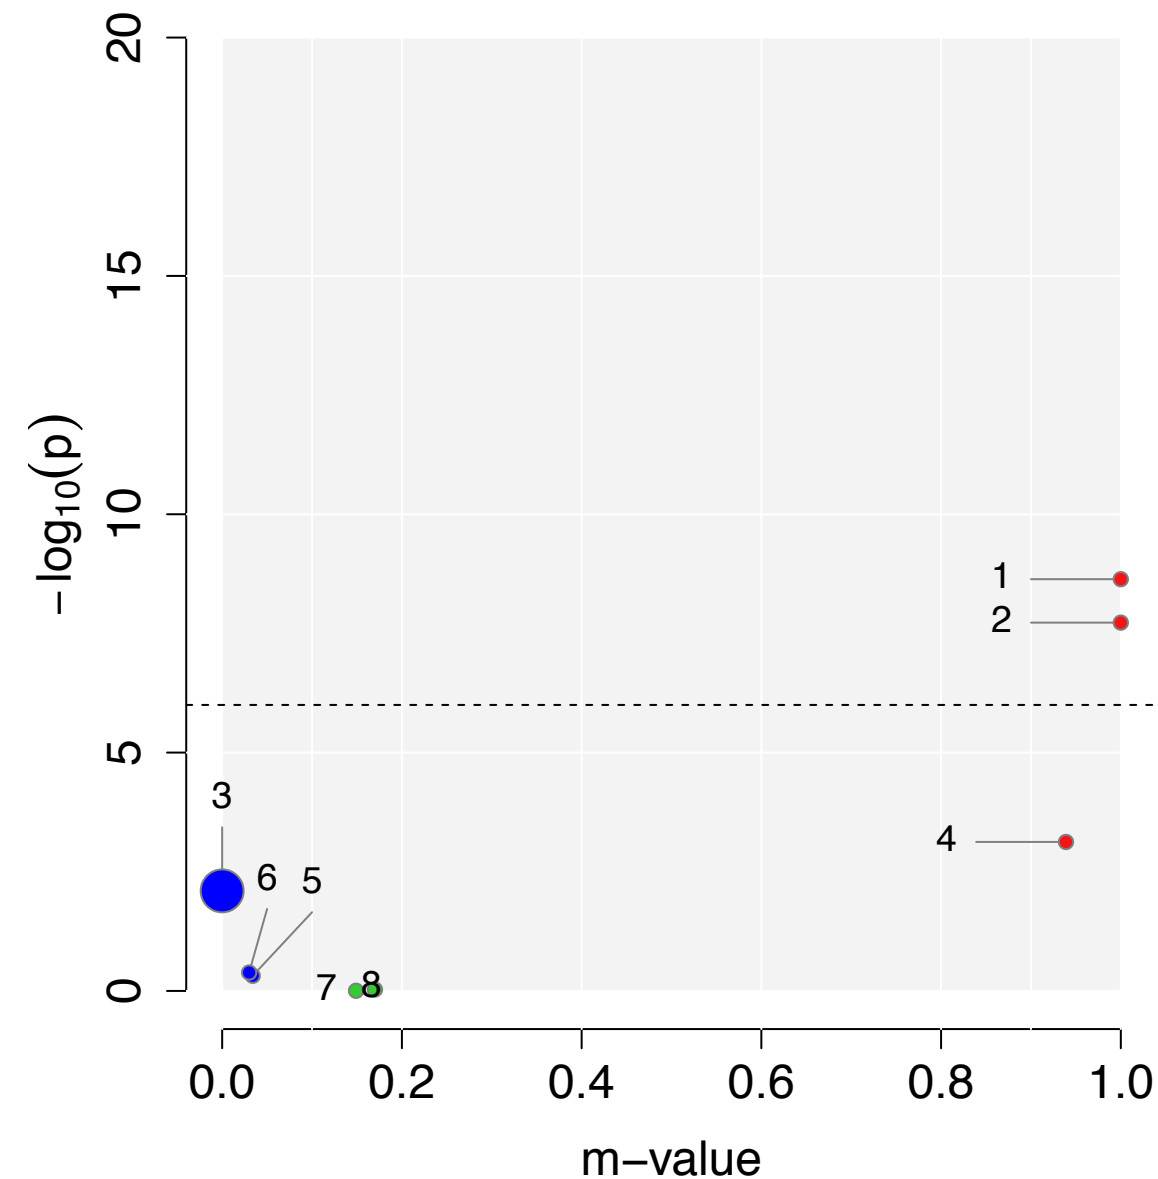

# rs75059851 (Meta $P = 5.85 \times 10^{-10}$ )

Gene : *IGSF9B*

## GWAS P-value

- 1.90 x 10<sup>-11</sup> ● 1.SCZ
- 0.1245 ● 2.BIP
- 0.6802 ● 3.MD
- 0.7897 ● 4.ASD
- 0.0292 ● 5.ADHD
- 0.9859 ● 6.TS
- 0.0443 ● 7.ANO
- 0.6261 ● 8.OCD

FE summary

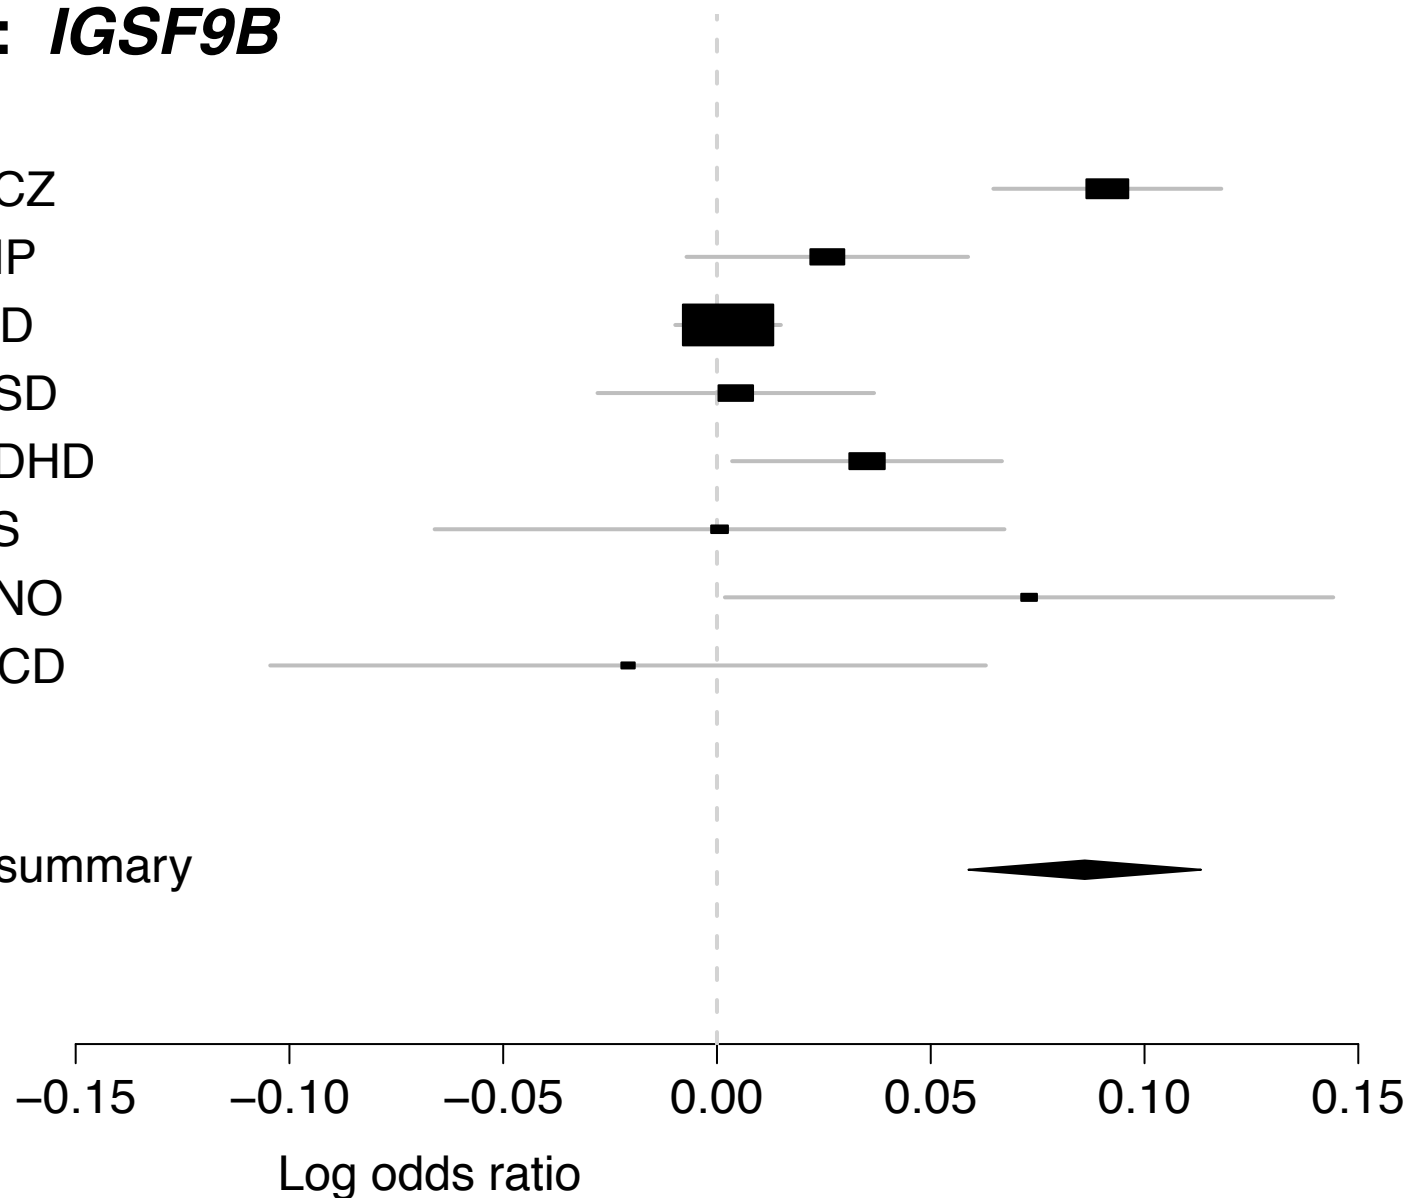

## PM-Plot

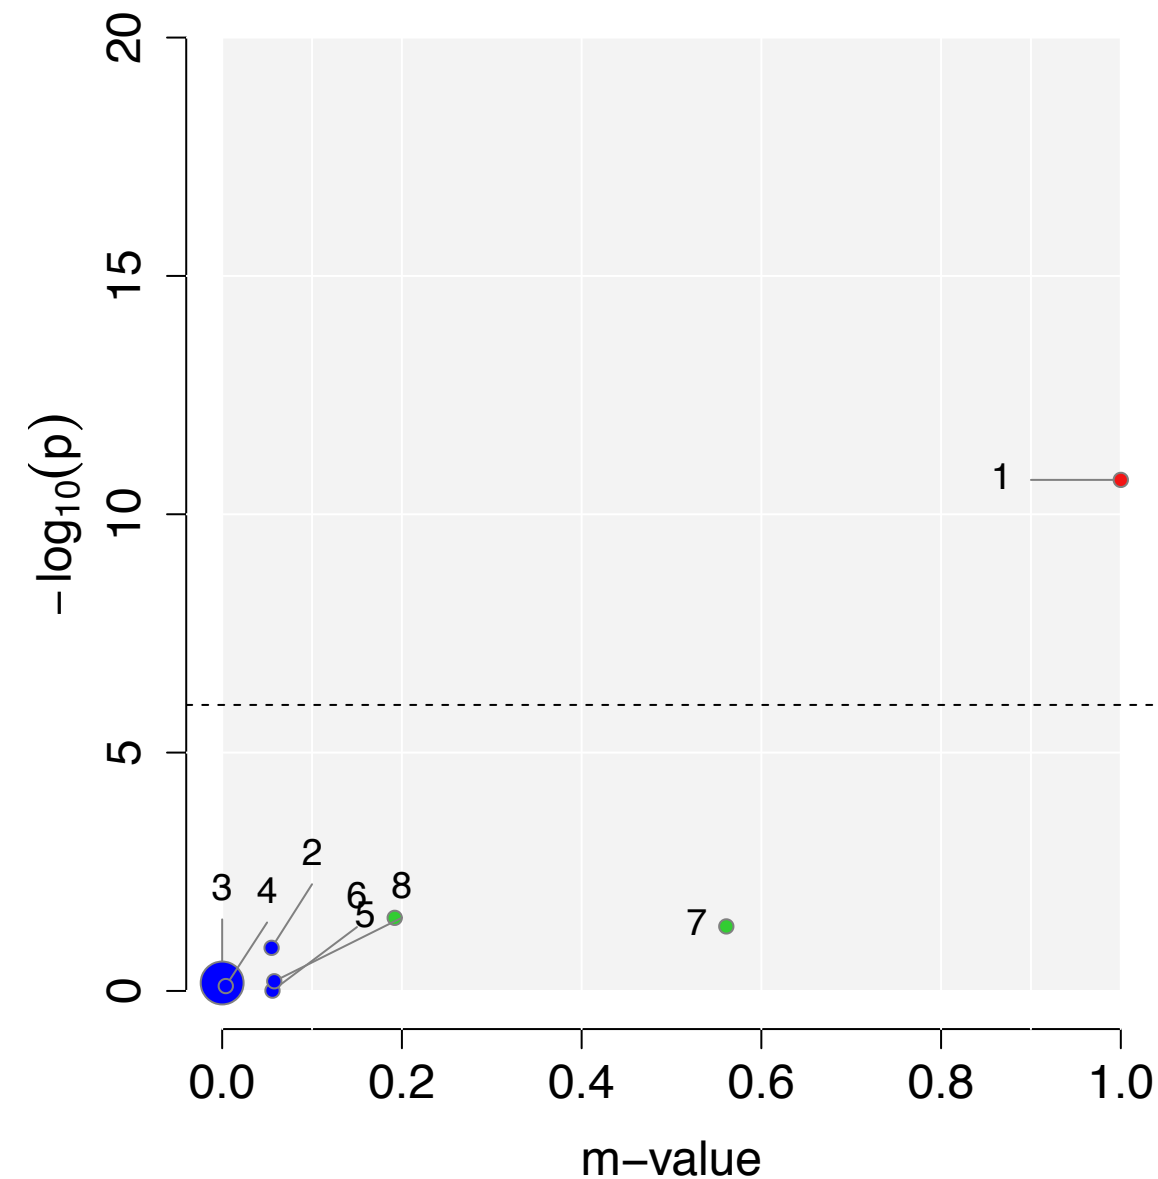

rs77135925 (Meta  $P = 7.73 \times 10^{-9}$ )

Gene : *MYO18A*, *CRYBA1*

GWAS P-value

- 0.6369 ● 1.SCZ
- 0.0040 ● 2.BIP
- $9.92 \times 10^{-9}$  ● 3.MD
- 0.4653 ● 4.ASD
- 0.3377 ● 5.ADHD
- 0.7981 ● 6.TS
- 0.0303 ● 7.ANO
- 0.3456 ● 8.OCD

FE summary

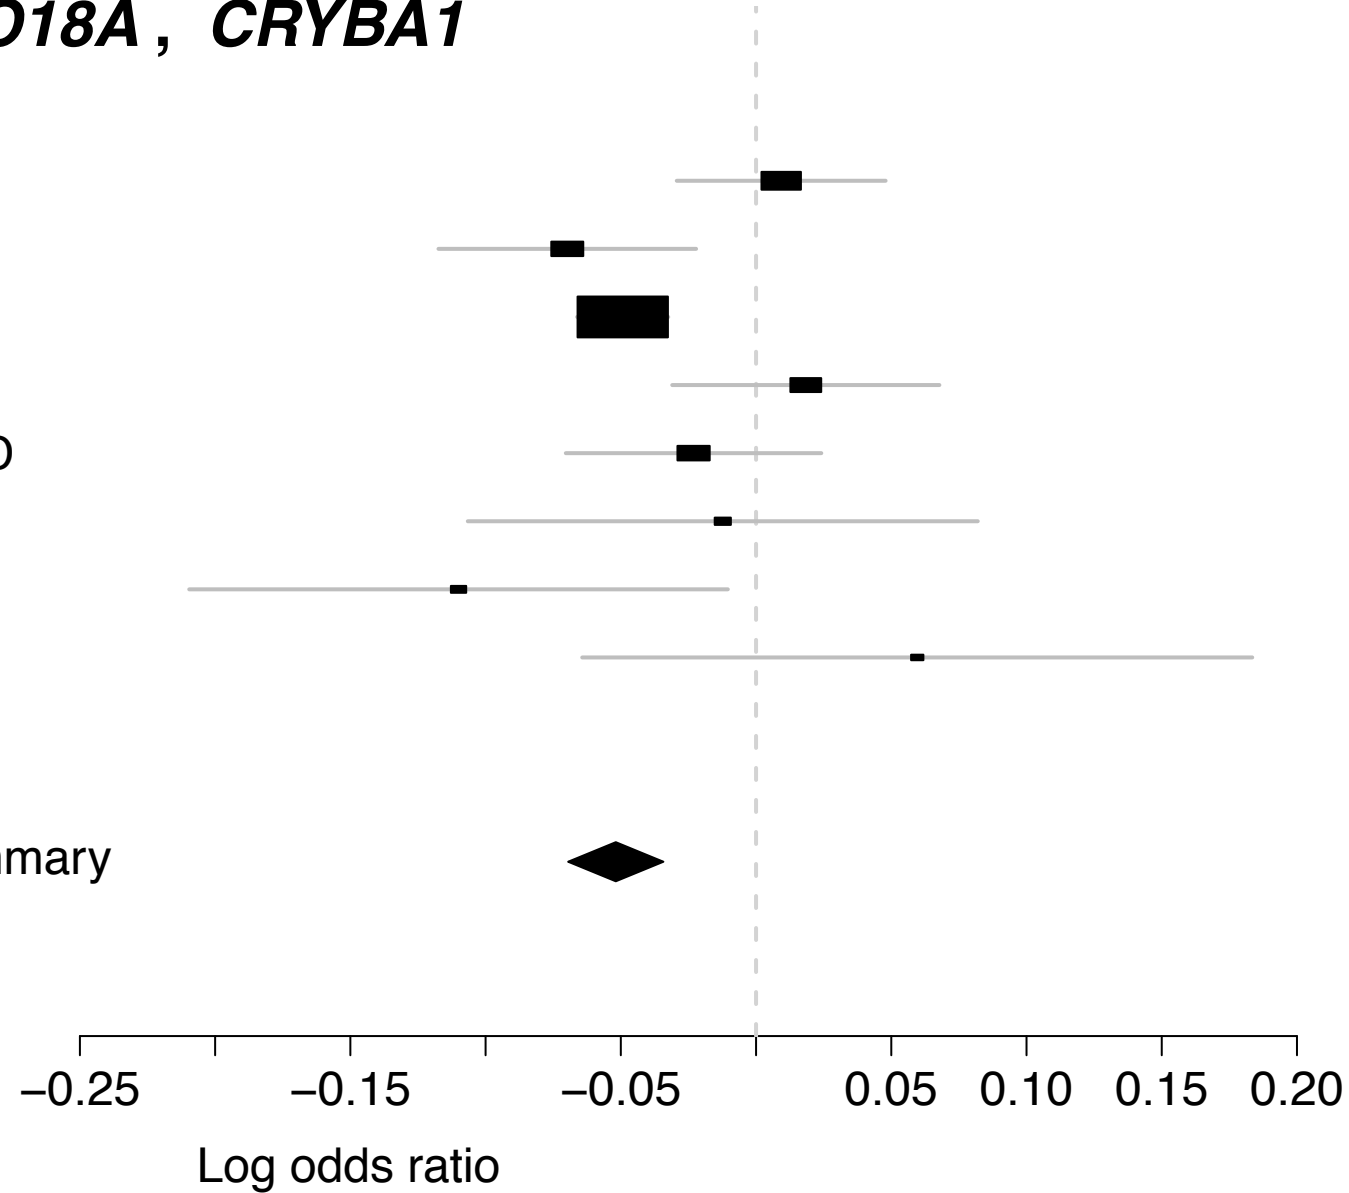

PM-Plot

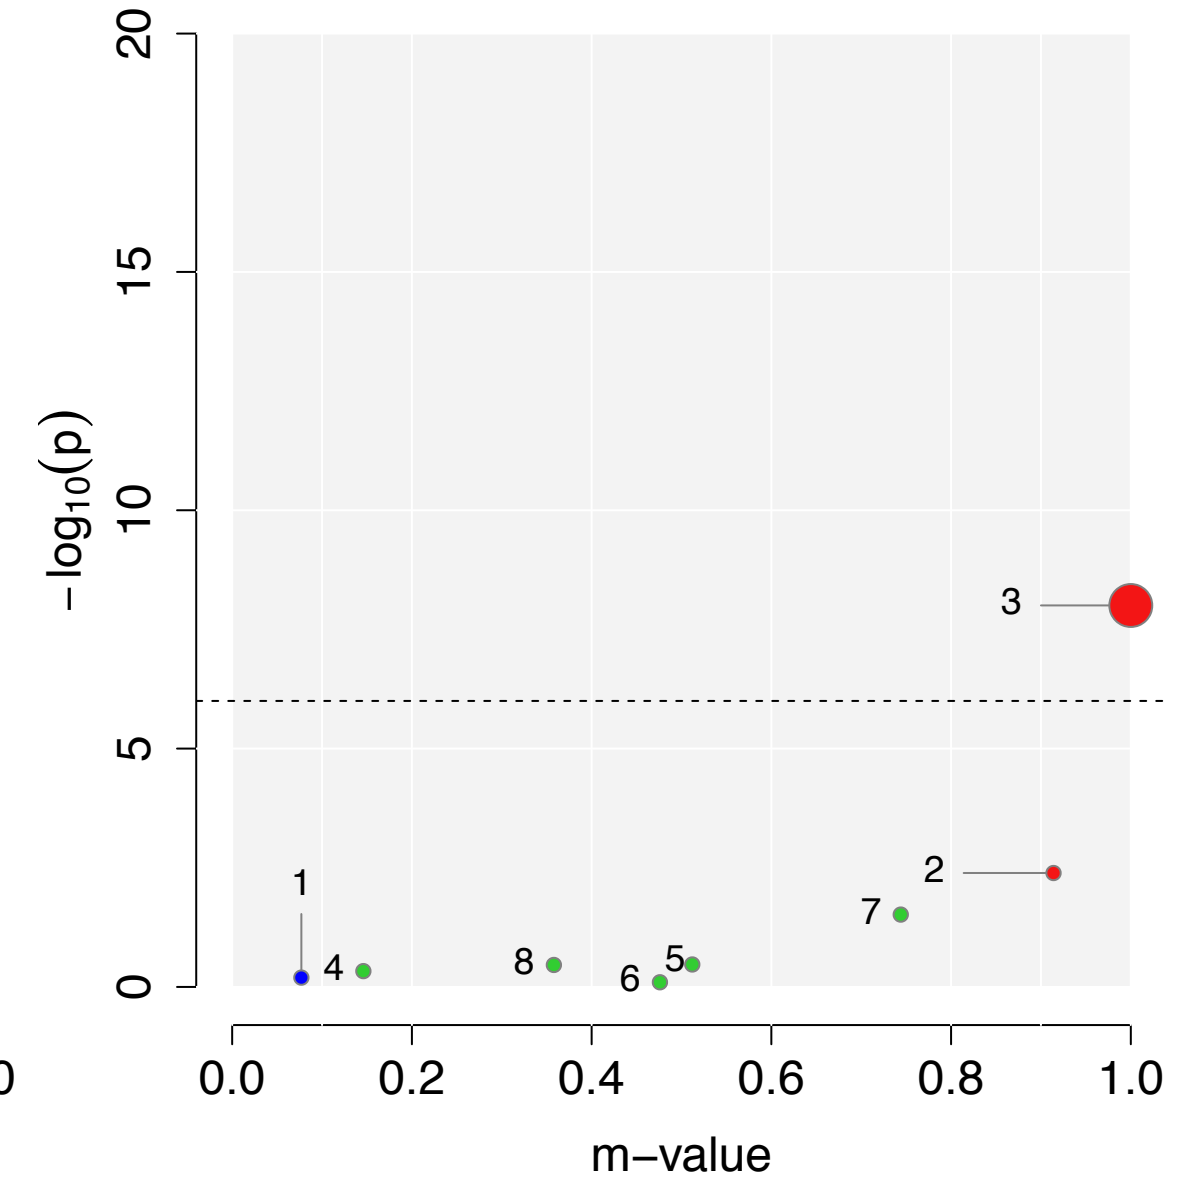



# rs78337797 (Meta $P = 4.98 \times 10^{-8}$ )

Gene : **SOX5**

## GWAS P-value

- 0.0004 ● 1.SCZ
- 0.0281 ● 2.BIP
- $4.68 \times 10^{-6}$  ● 3.MD
- 0.0096 ● 4.ASD
- 0.1656 ● 5.ADHD
- 0.2353 ● 6.TS
- 0.9478 ● 7.ANO
- 0.6796 ● 8.OCD

FE summary

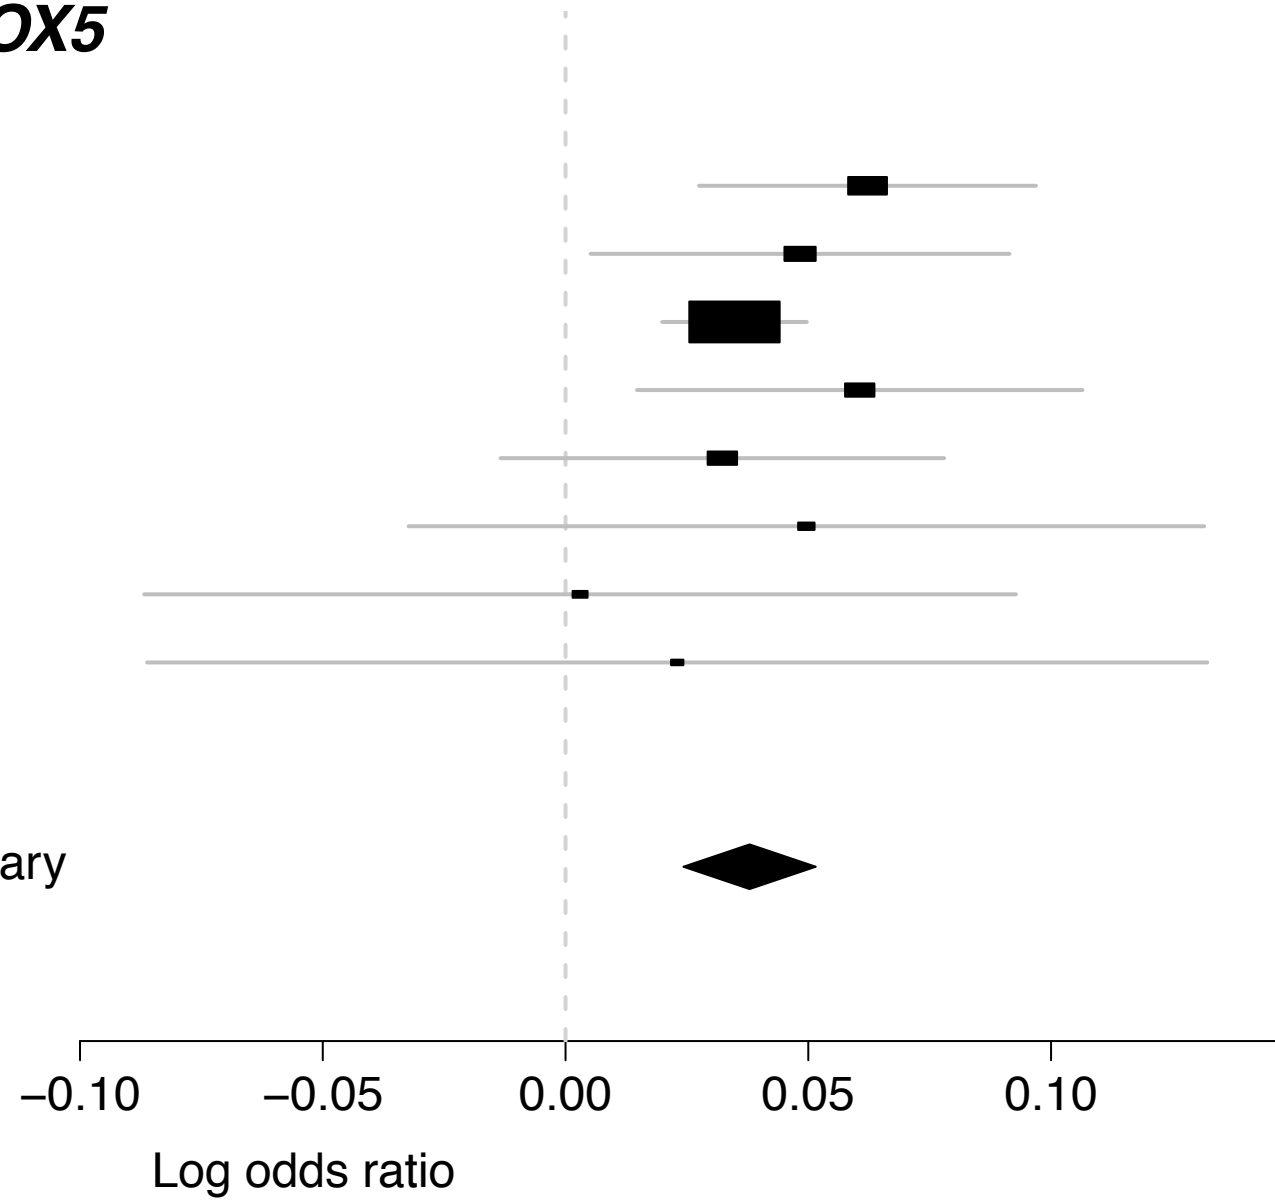

## PM-Plot

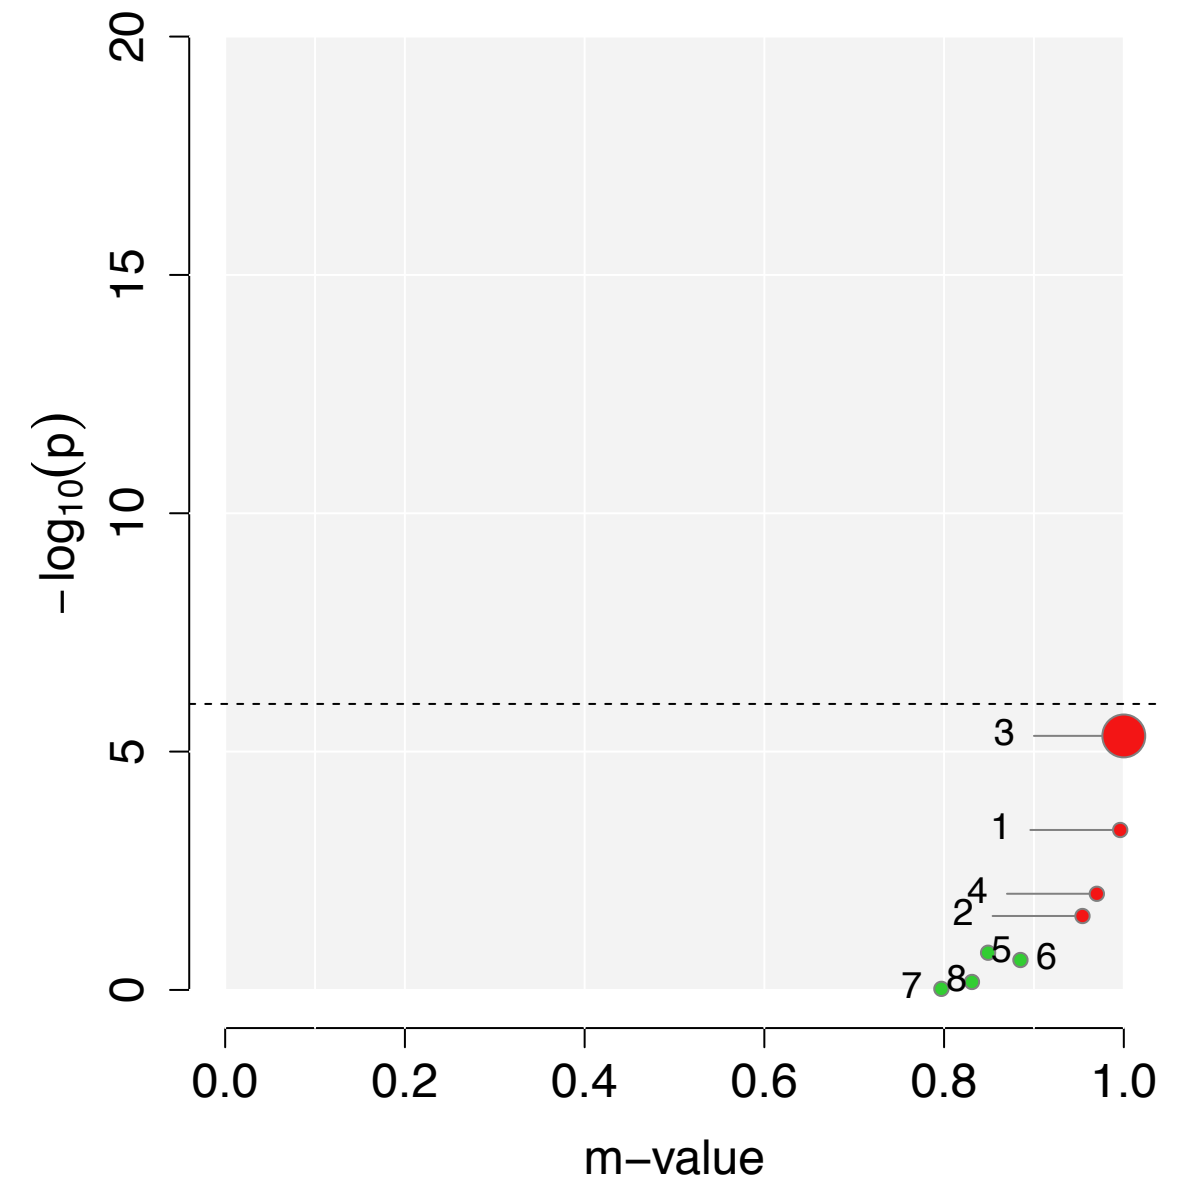

# rs79879286 (Meta $P = 7.21 \times 10^{-11}$ )

Gene : *OSBPL3*, *DFNA5*

## GWAS P-value

- 1.96 x 10<sup>-5</sup> ● 1.SCZ
- 4.51 x 10<sup>-6</sup> ● 2.BIP
- 8.76 x 10<sup>-7</sup> ● 3.MD
- 0.0150 ● 4.ASD
- 0.0705 ● 5.ADHD
- 0.7519 ● 6.TS
- 0.3620 ● 7.ANO
- 0.5698 ● 8.OCD

FE summary

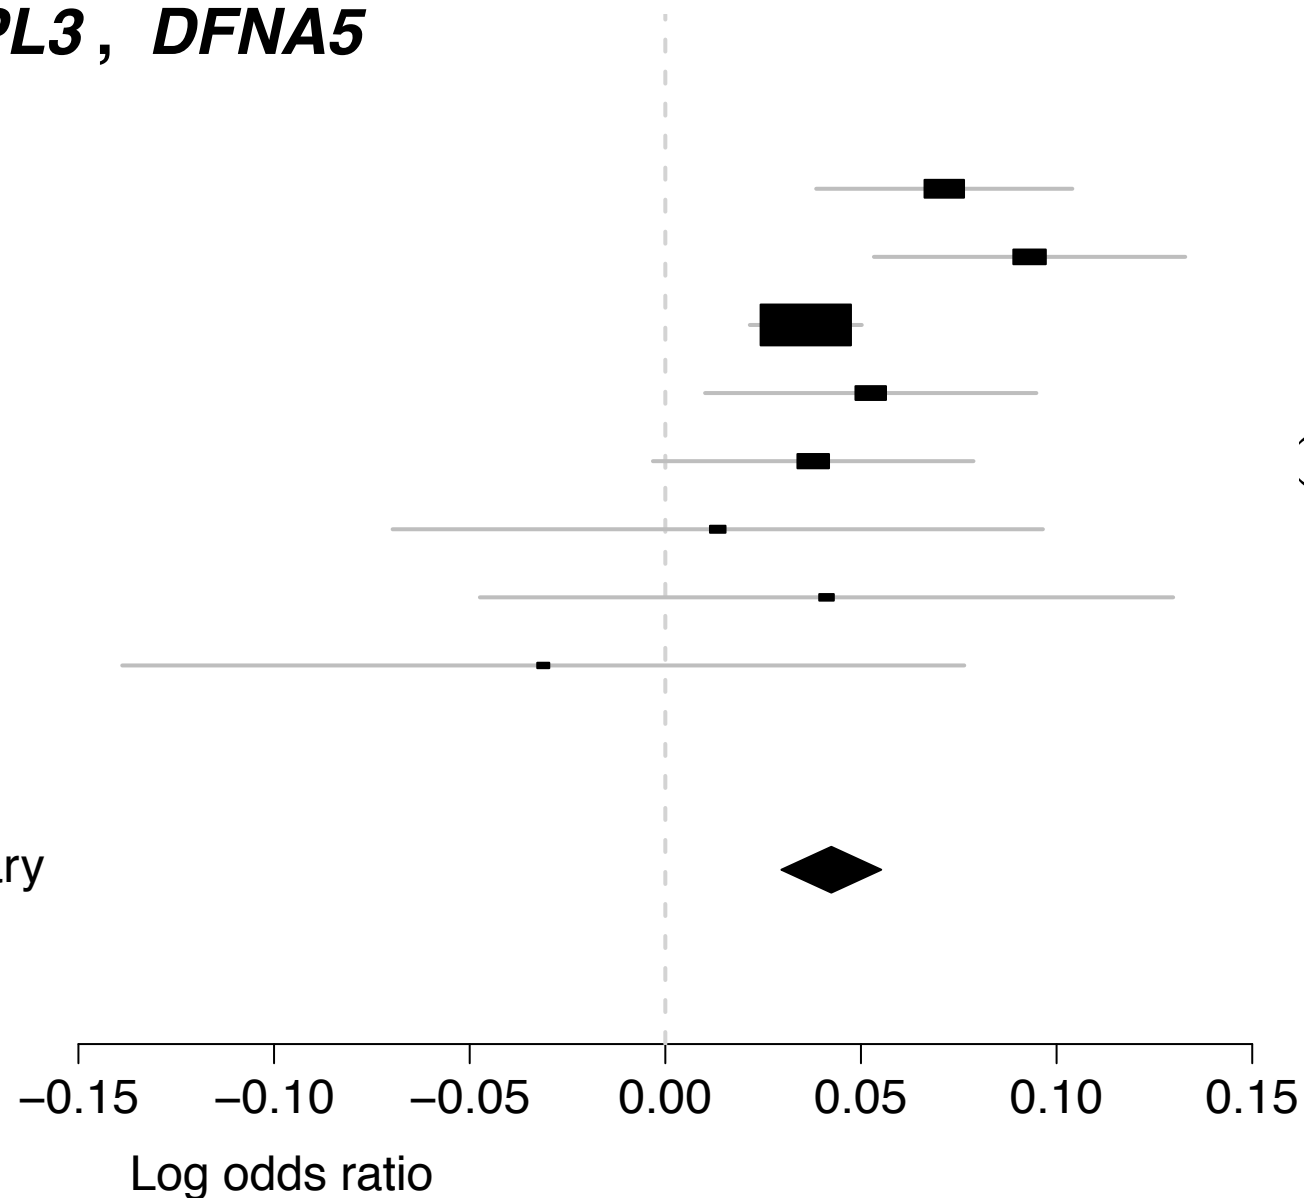

## PM-Plot

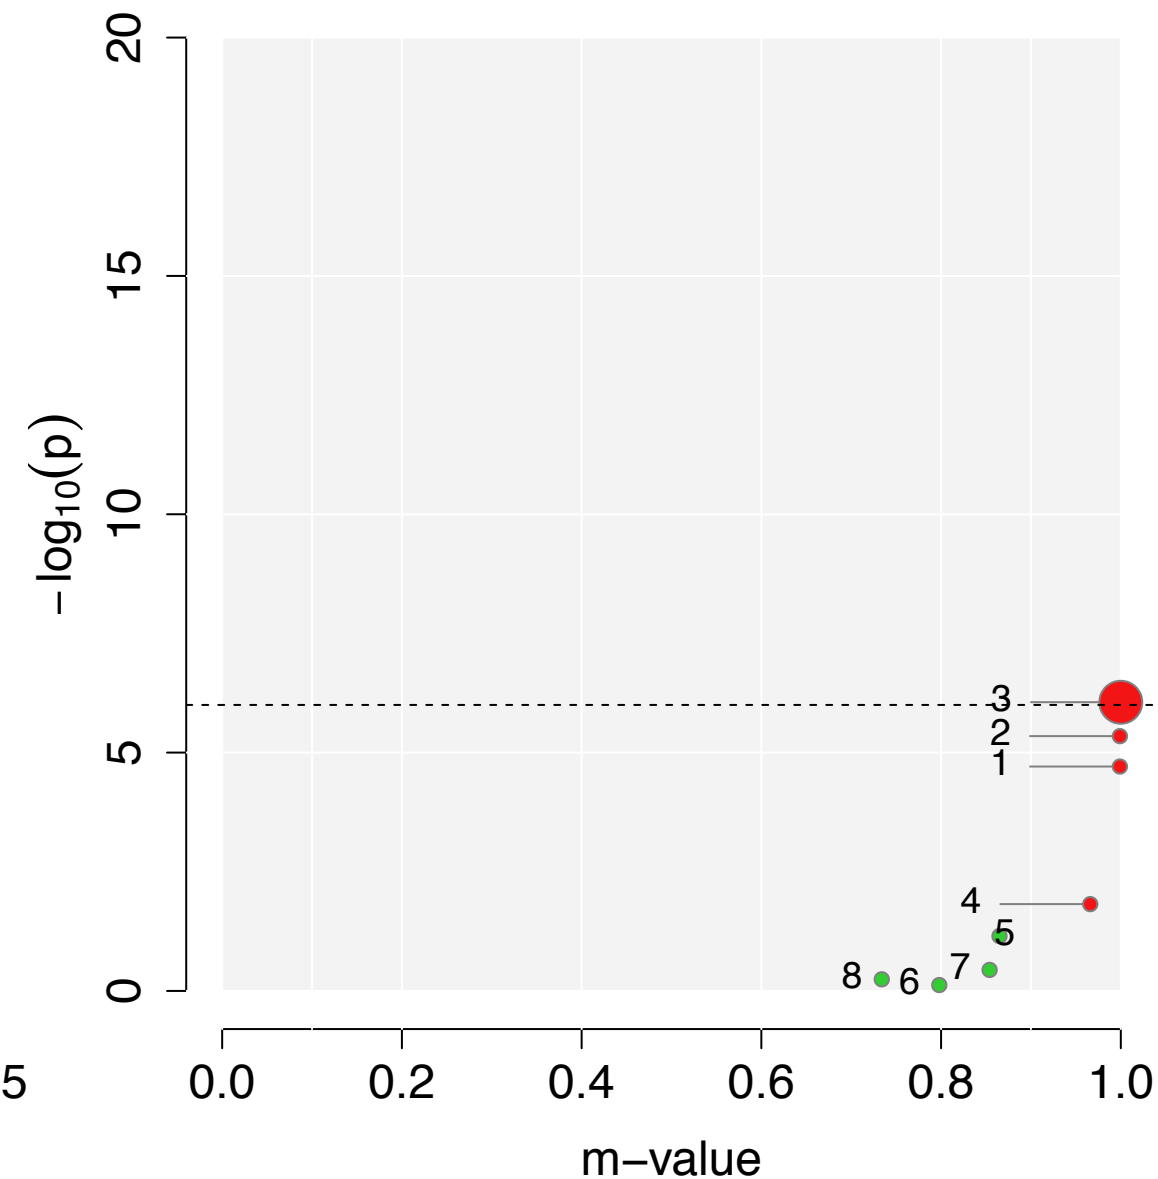

# rs80256351 (Meta $P = 2.56 \times 10^{-9}$ )

Gene : (>200kb)

## GWAS P-value

- $3.51 \times 10^{-7}$  ● 1.SCZ
- $1.15 \times 10^{-7}$  ● 2.BIP
- 0.0747 ● 3.MD
- 0.5343 ● 4.ASD
- 0.5287 ● 5.ADHD
- 0.4262 ● 6.TS
- 0.9292 ● 7.ANO
- 0.4587 ● 8.OCD

FE summary

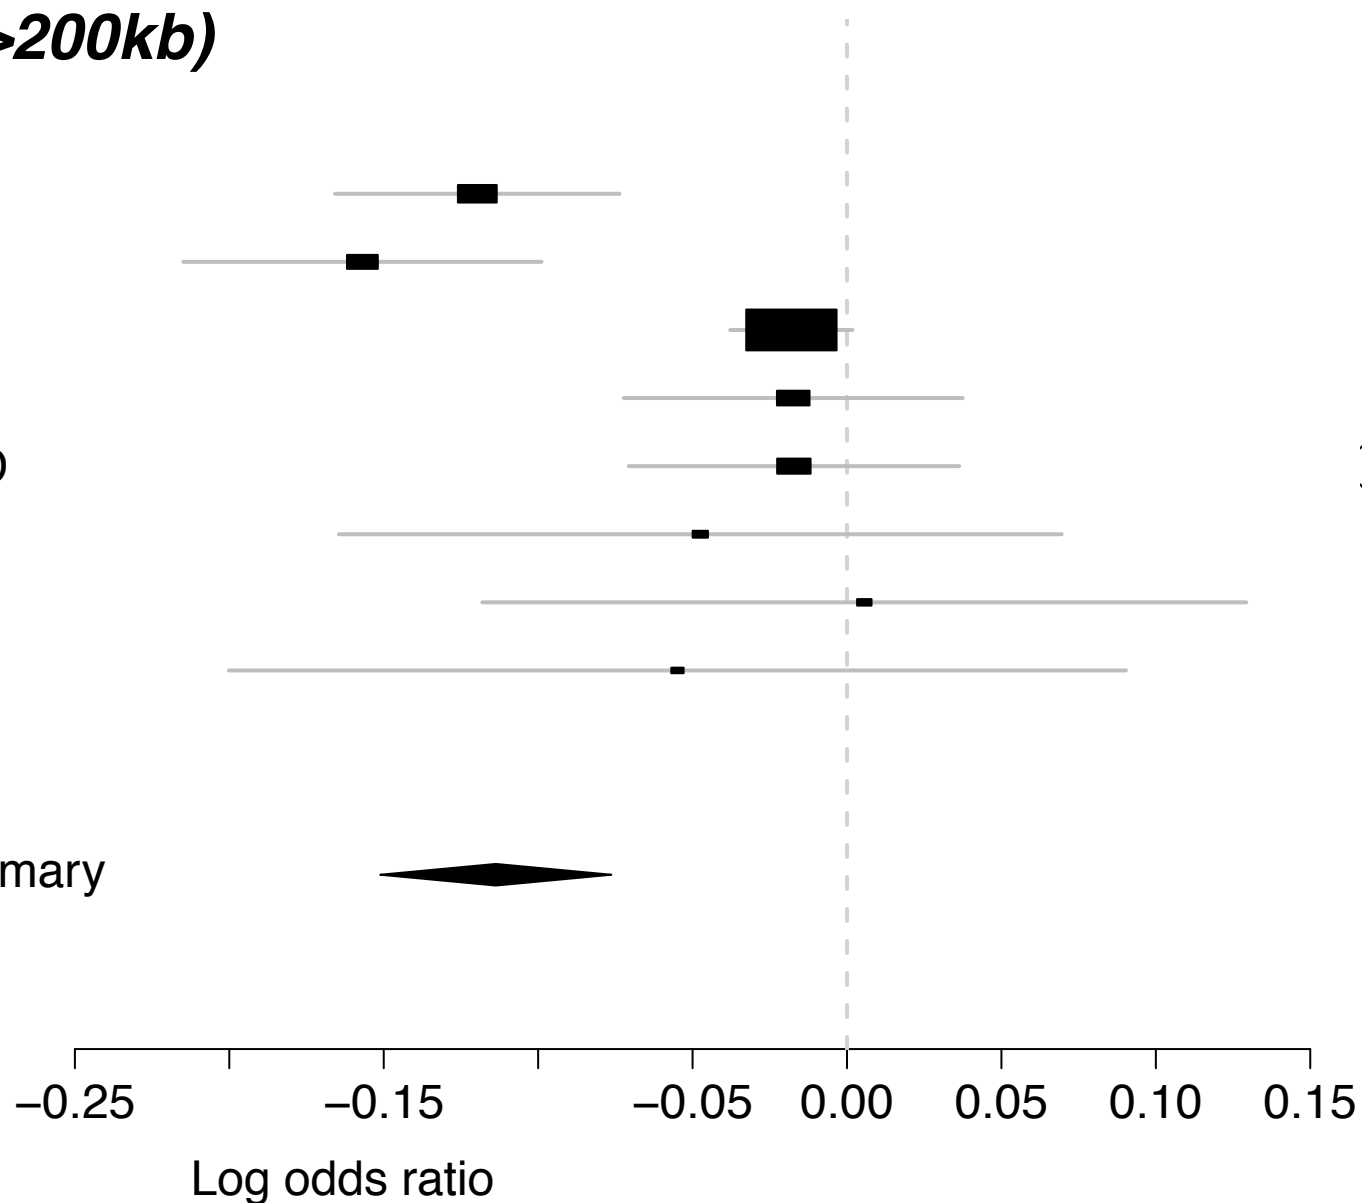

## PM-Plot

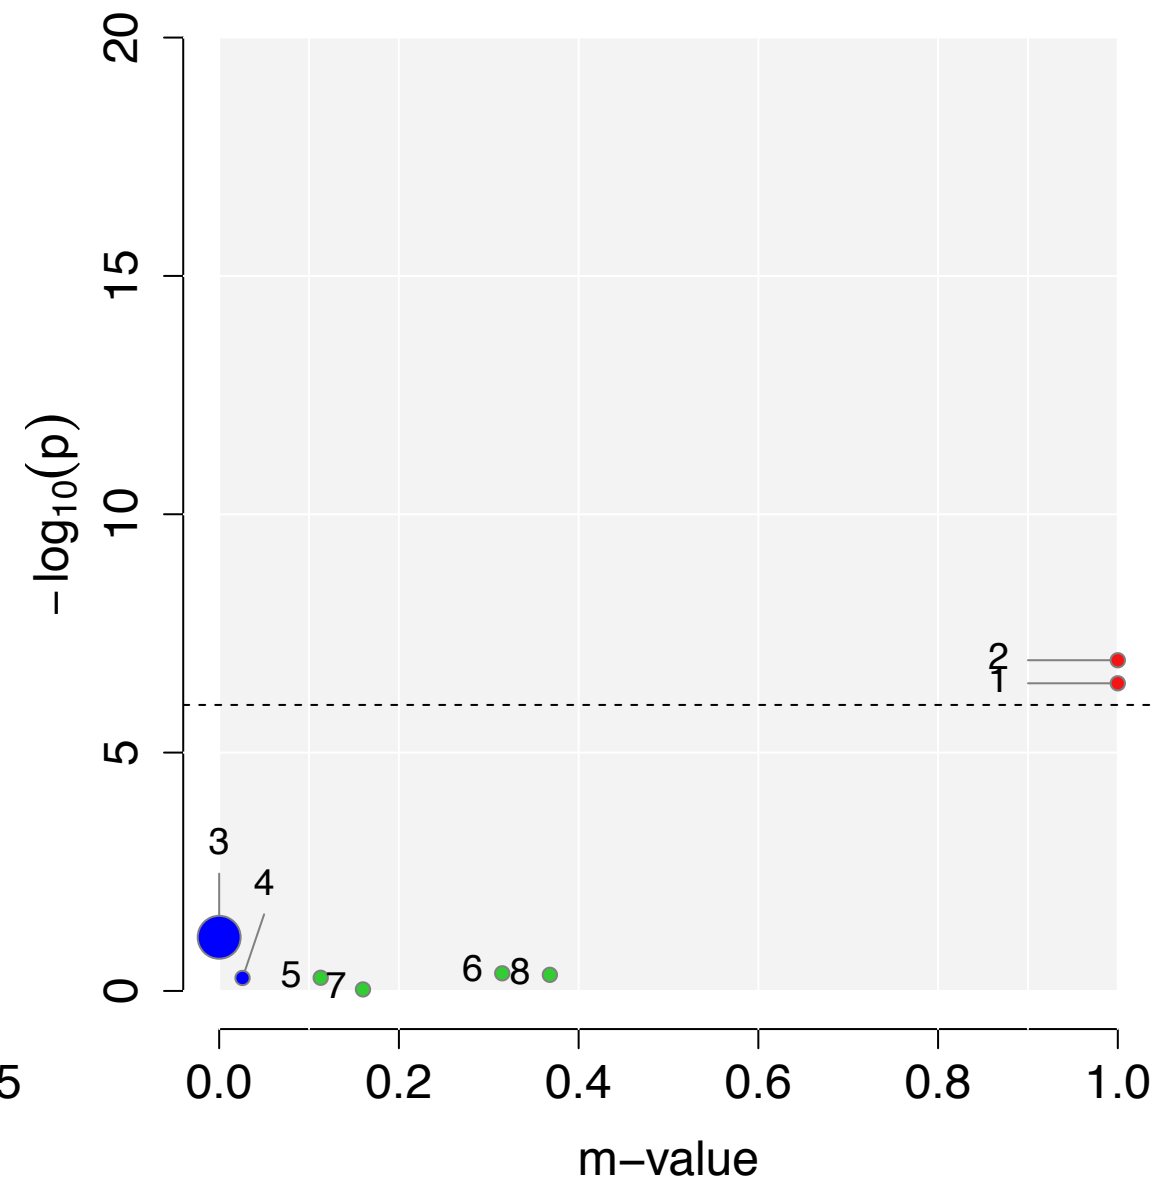

# rs80318442 (Meta $P = 4.03 \times 10^{-12}$ )

Gene : (>200kb)

## GWAS P-value

- 2.65 x 10<sup>-6</sup> ● 1.SCZ
- 9.20 x 10<sup>-5</sup> ● 2.BIP
- 0.2222 ● 3.MD
- 0.2241 ● 4.ASD
- 2.62 x 10<sup>-8</sup> ● 5.ADHD
- 0.9884 ● 6.TS
- 0.0619 ● 7.ANO
- 0.8721 ● 8.OCD

FE summary

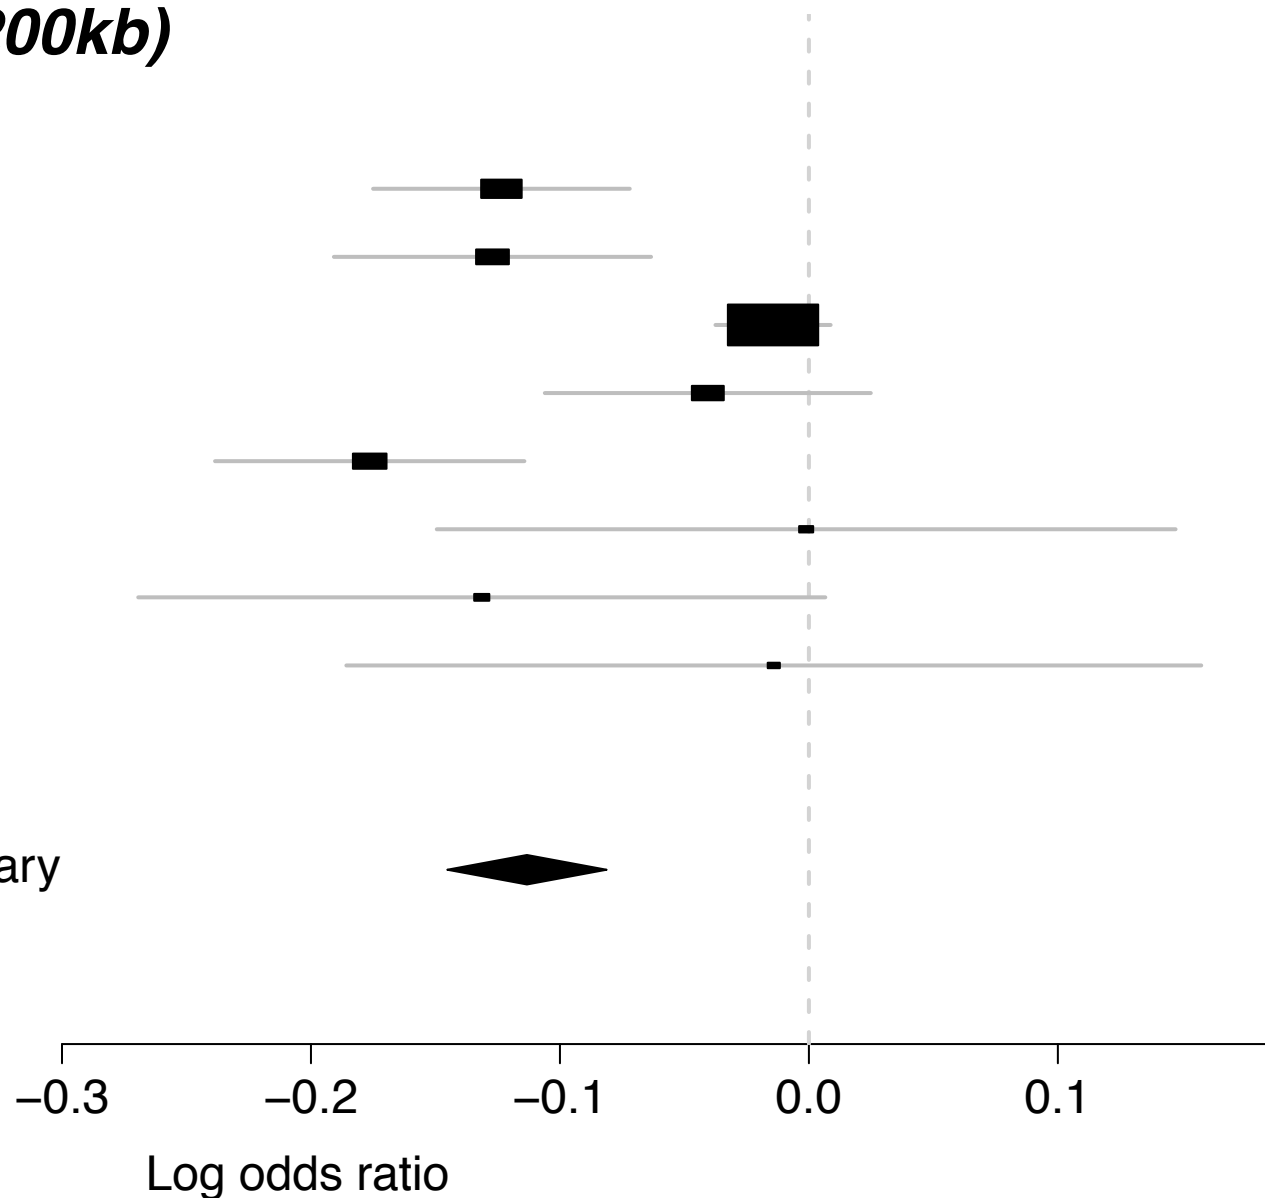

## PM-Plot

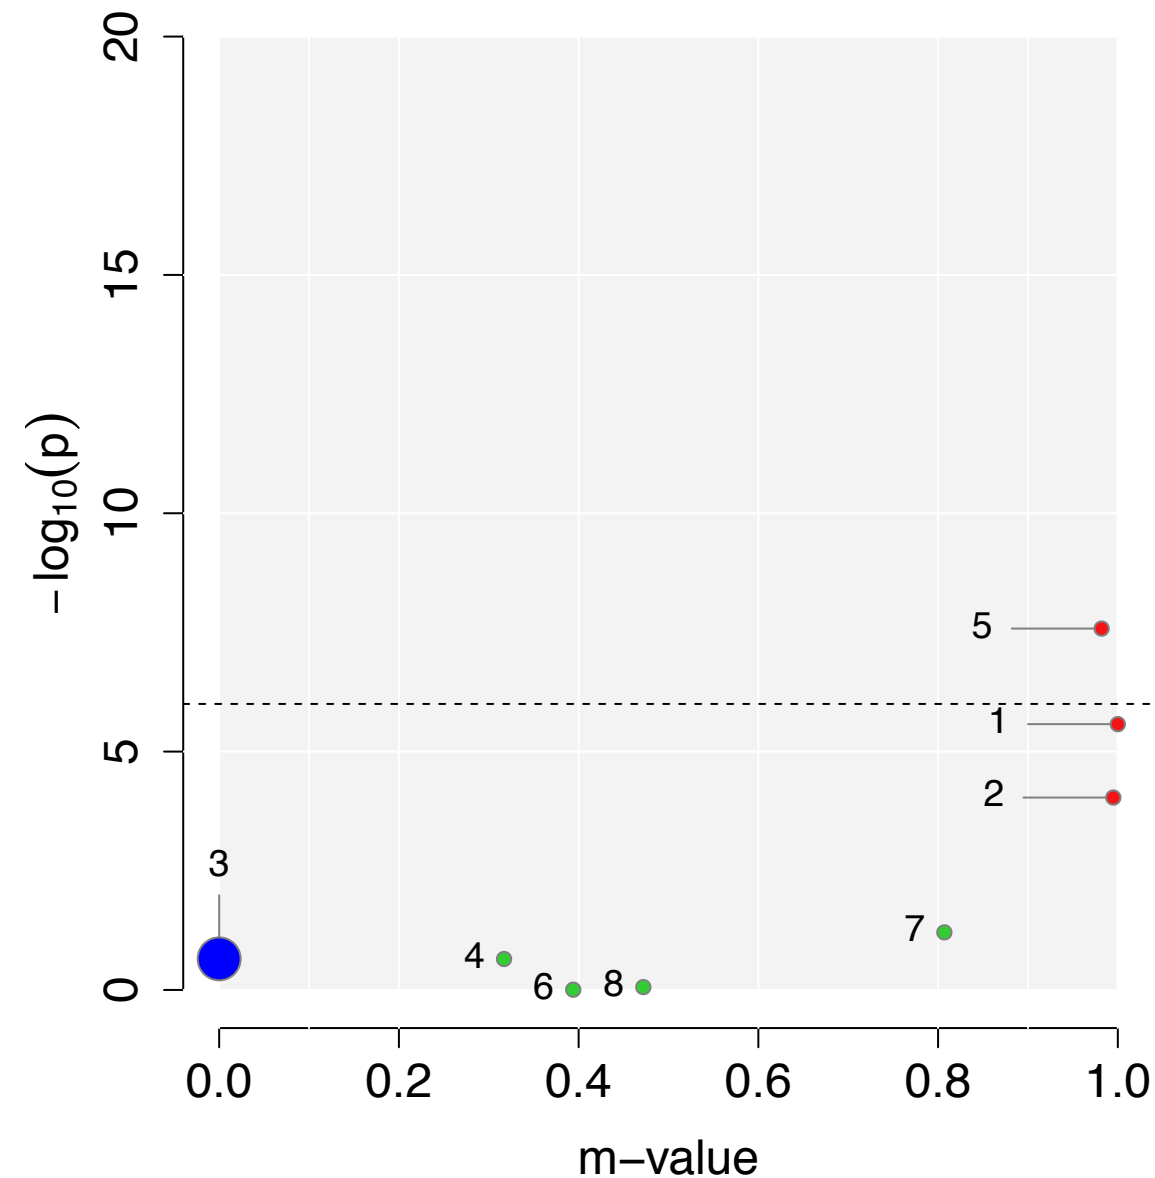

# rs111294930 (Meta $P = 2.77 \times 10^{-10}$ )

Gene : (>200kb)

## GWAS P-value

- 8.63 x 10<sup>-10</sup> ● 1.SCZ
- 7.45 x 10<sup>-6</sup> ● 2.BIP
- 0.1012 ● 3.MD
- 0.7809 ● 4.ASD
- 0.3409 ● 5.ADHD
- 0.1137 ● 6.TS
- 0.9047 ● 7.ANO
- 0.3652 ● 8.OCD

FE summary

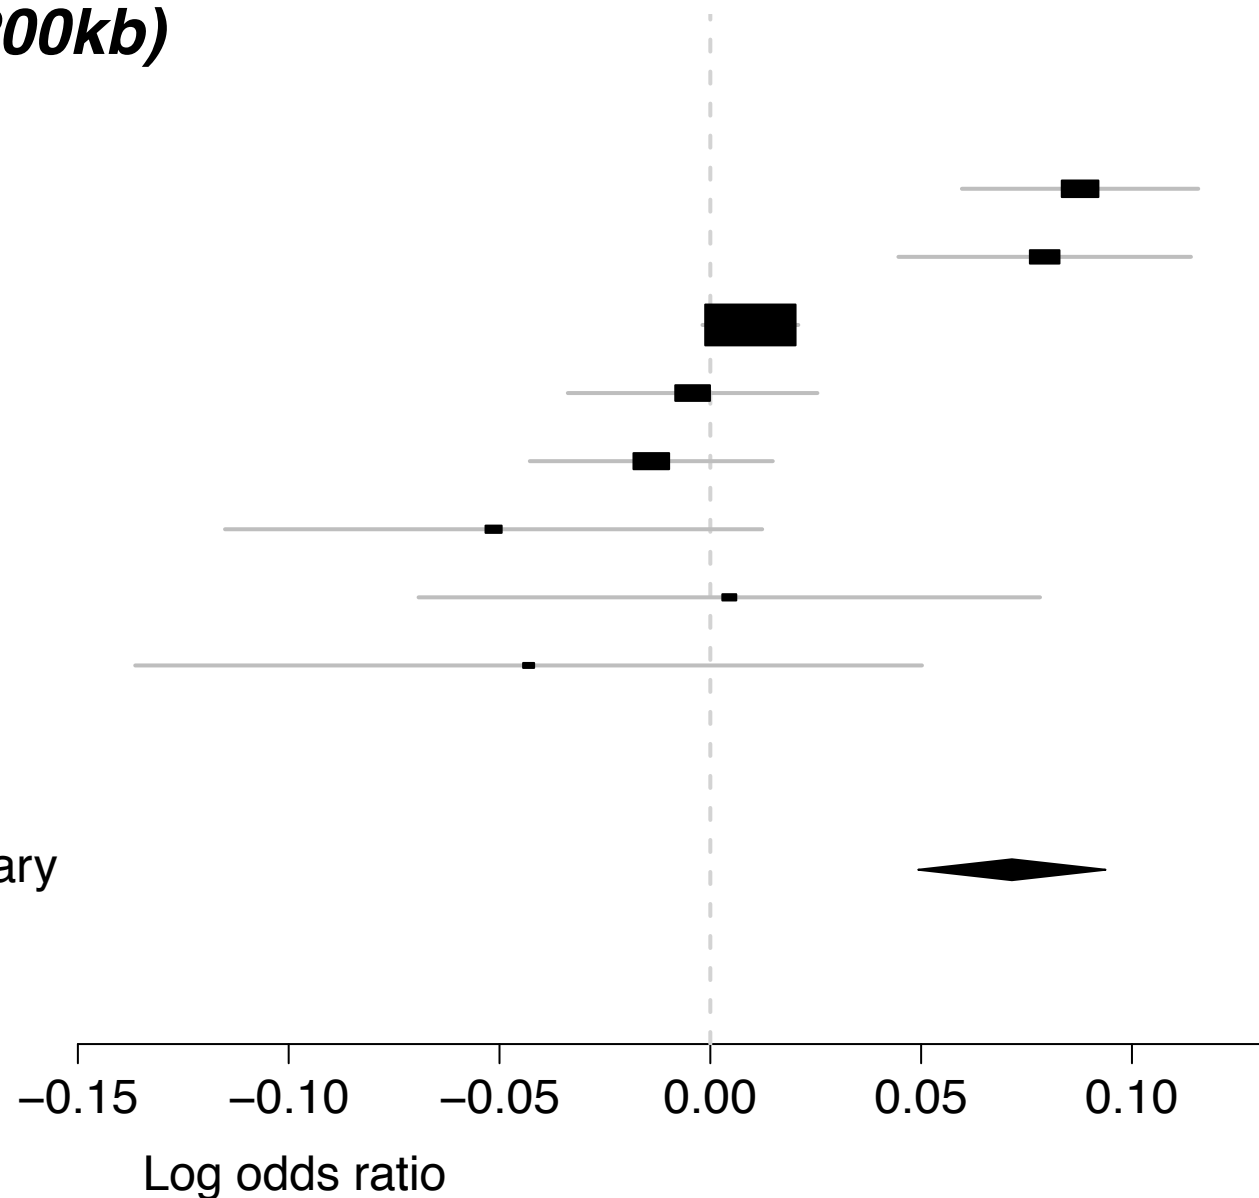

## PM-Plot

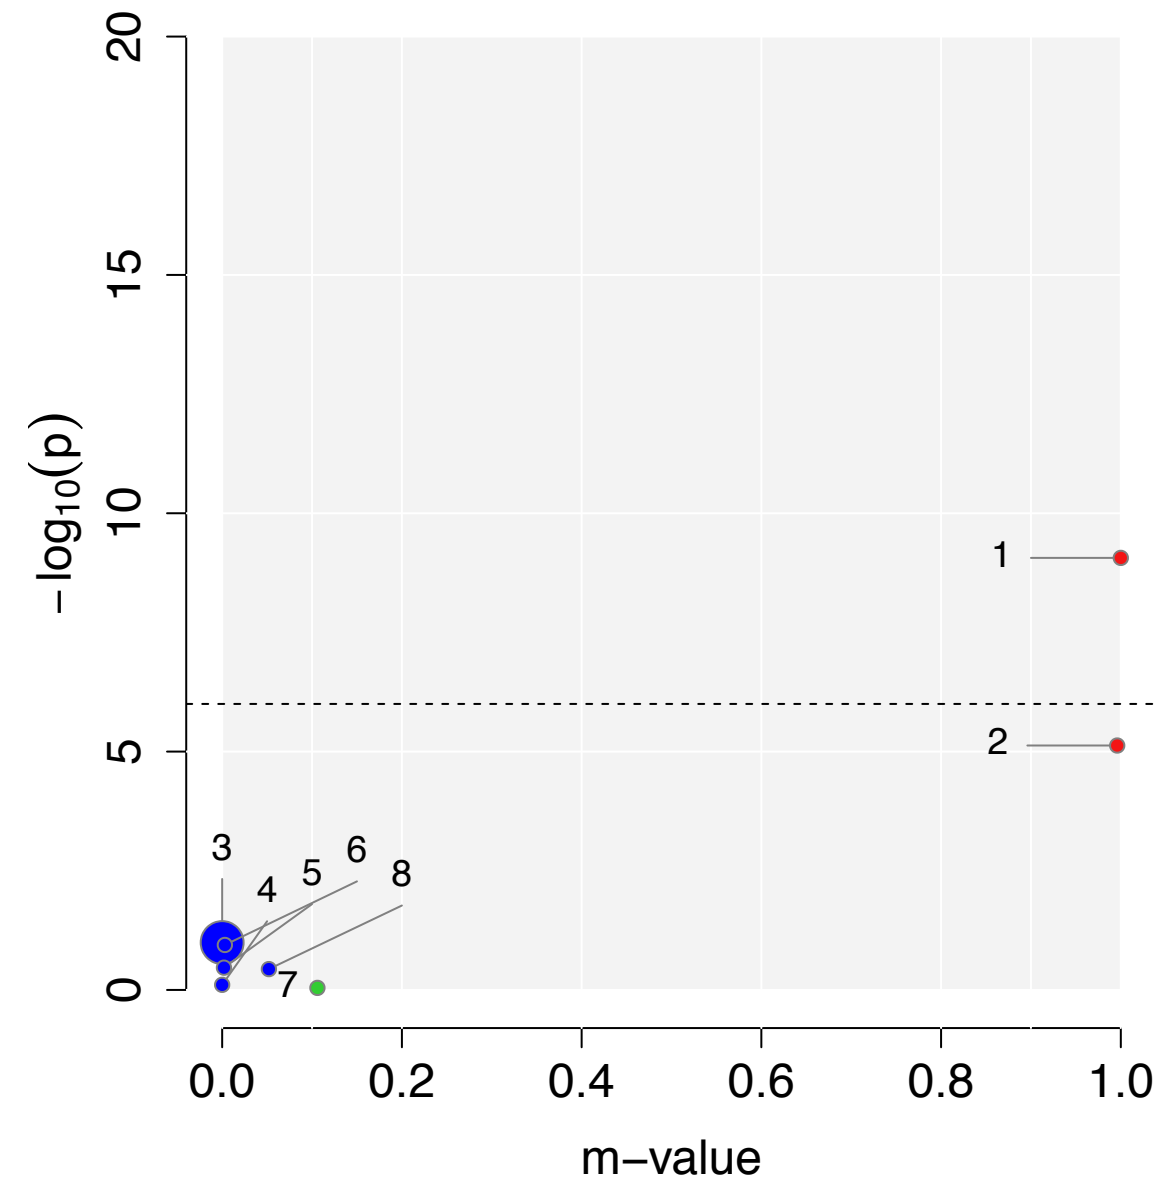

# rs116755193 (Meta $P = 1.04 \times 10^{-8}$ )

Gene : (>200kb)

## GWAS P-value

- 0.1008 ● 1.SCZ
- 0.0323 ● 2.BIP
- $5.20 \times 10^{-9}$  ● 3.MD
- 0.5347 ● 4.ASD
- 0.4221 ● 5.ADHD
- 0.4360 ● 6.TS
- 0.1838 ● 7.ANO
- 0.0740 ● 8.OCD

FE summary

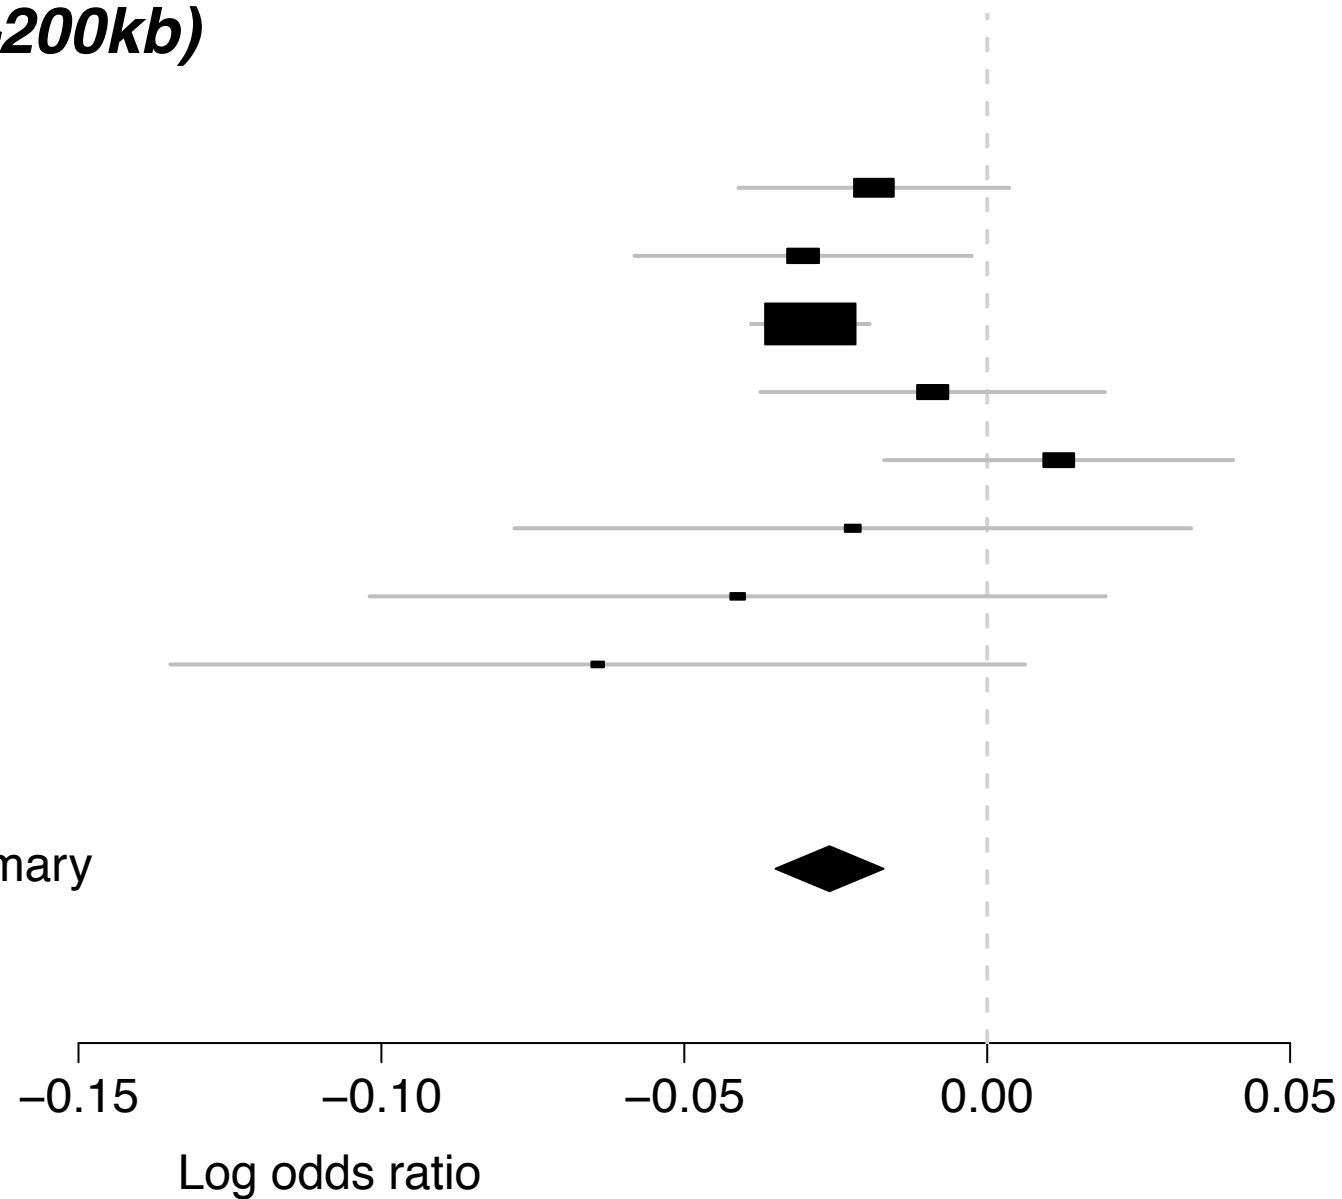

## PM-Plot

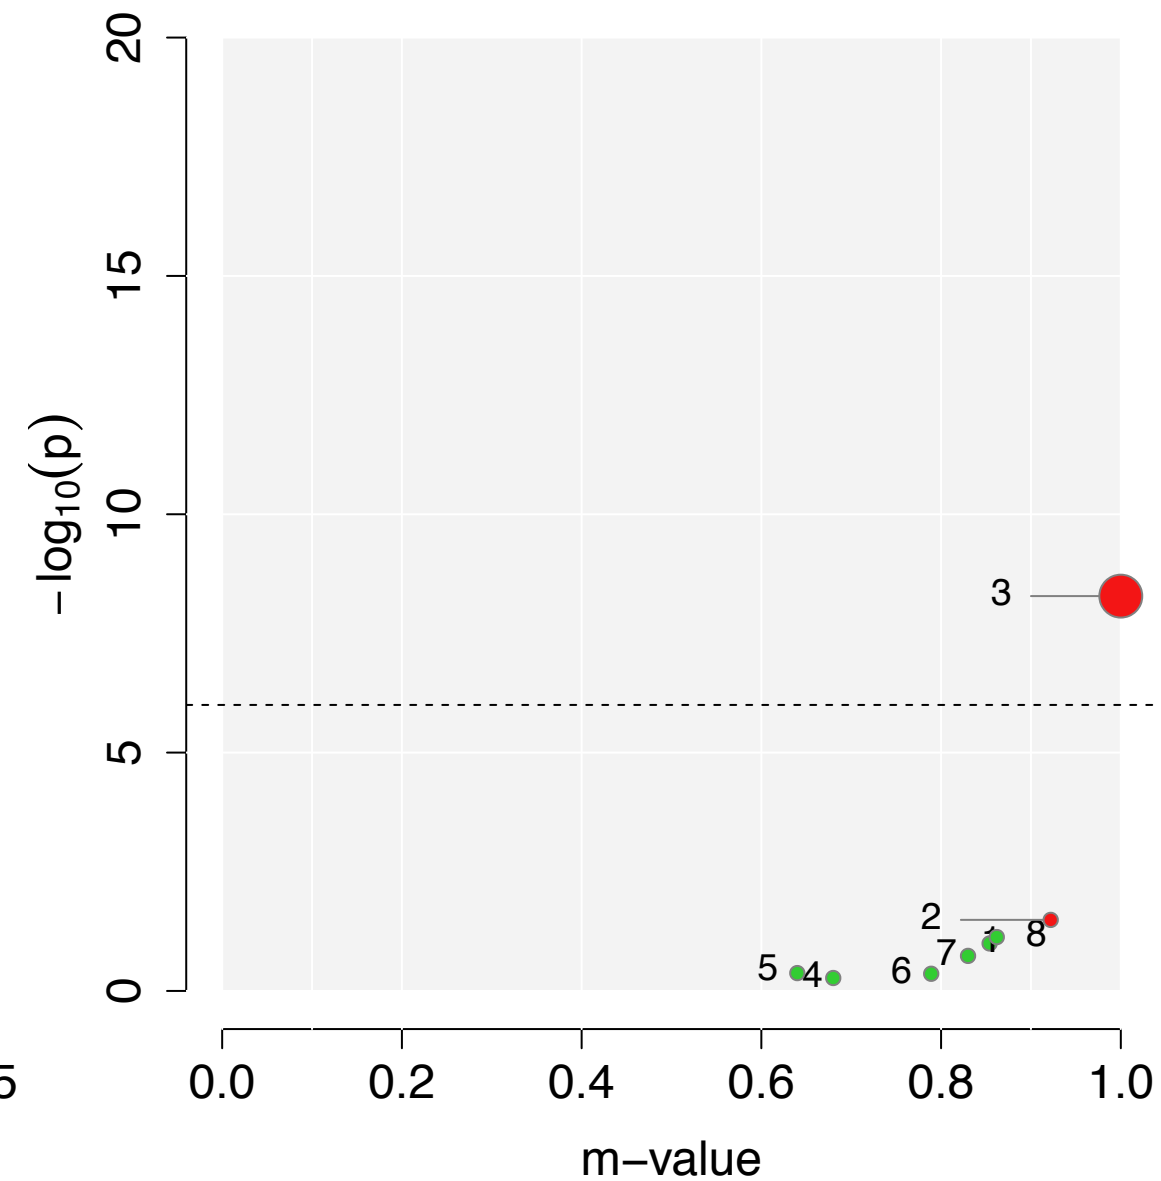

rs117956829 (Meta  $P = 1.82 \times 10^{-9}$ )

Gene : *NOX4*, *FOLH1B*

GWAS P-value

- 0.0002 ● 1.SCZ
- 0.0794 ● 2.BIP
- $3.27 \times 10^{-7}$  ● 3.MD
- 0.0068 ● 4.ASD
- 0.9716 ● 5.ADHD
- 0.6460 ● 6.TS
- 0.0125 ● 7.ANO
- 0.3330 ● 8.OCD

FE summary

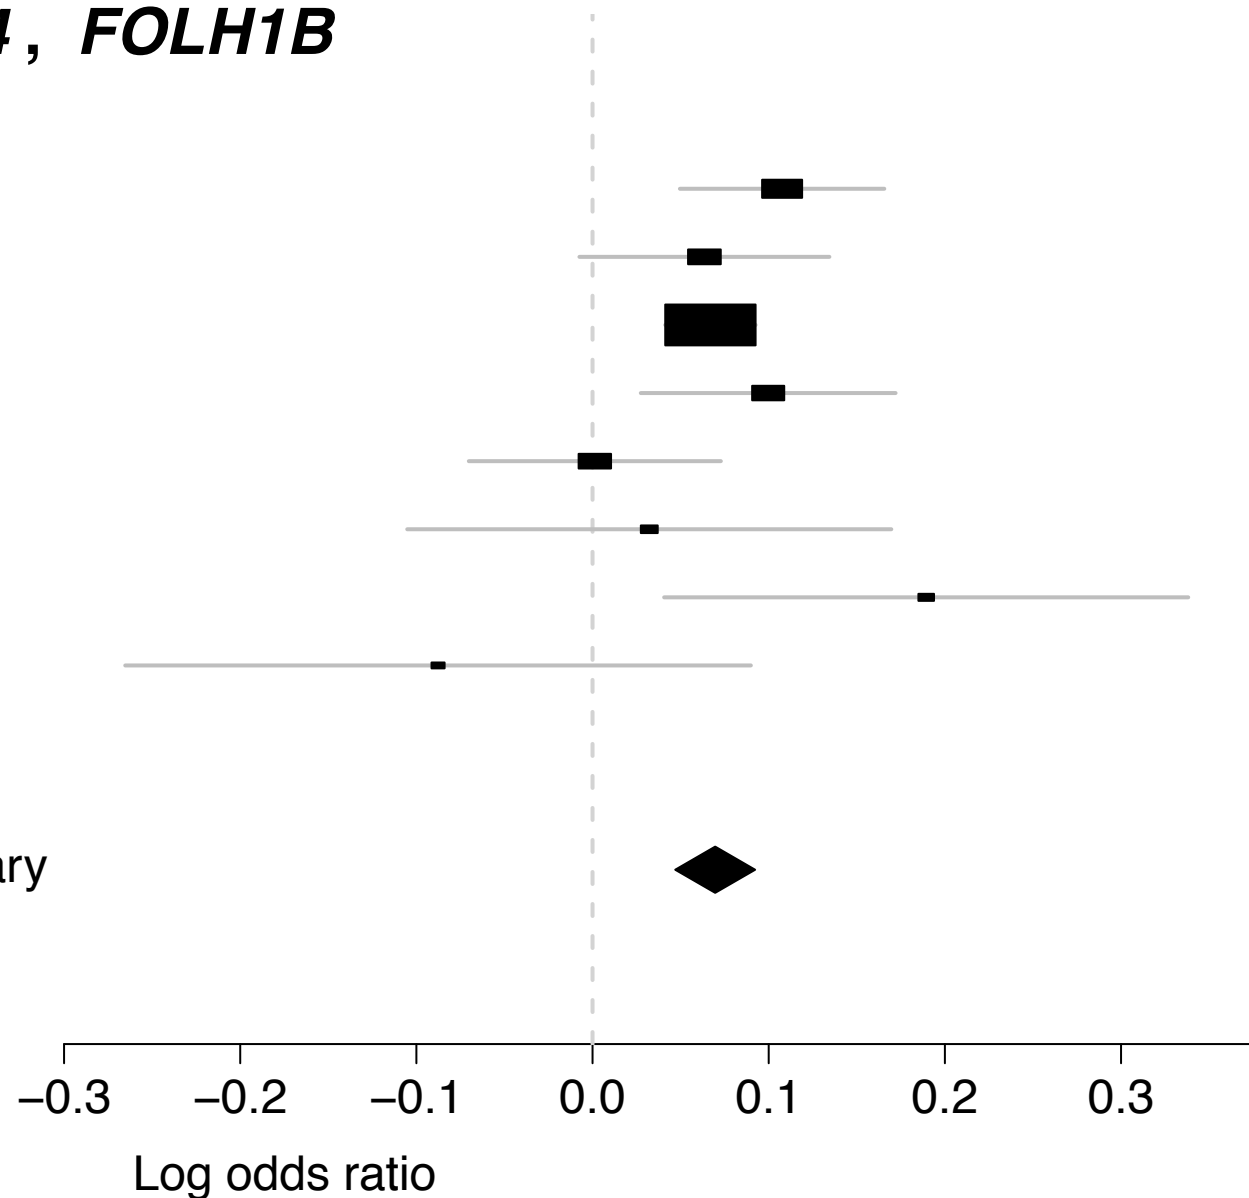

PM-Plot

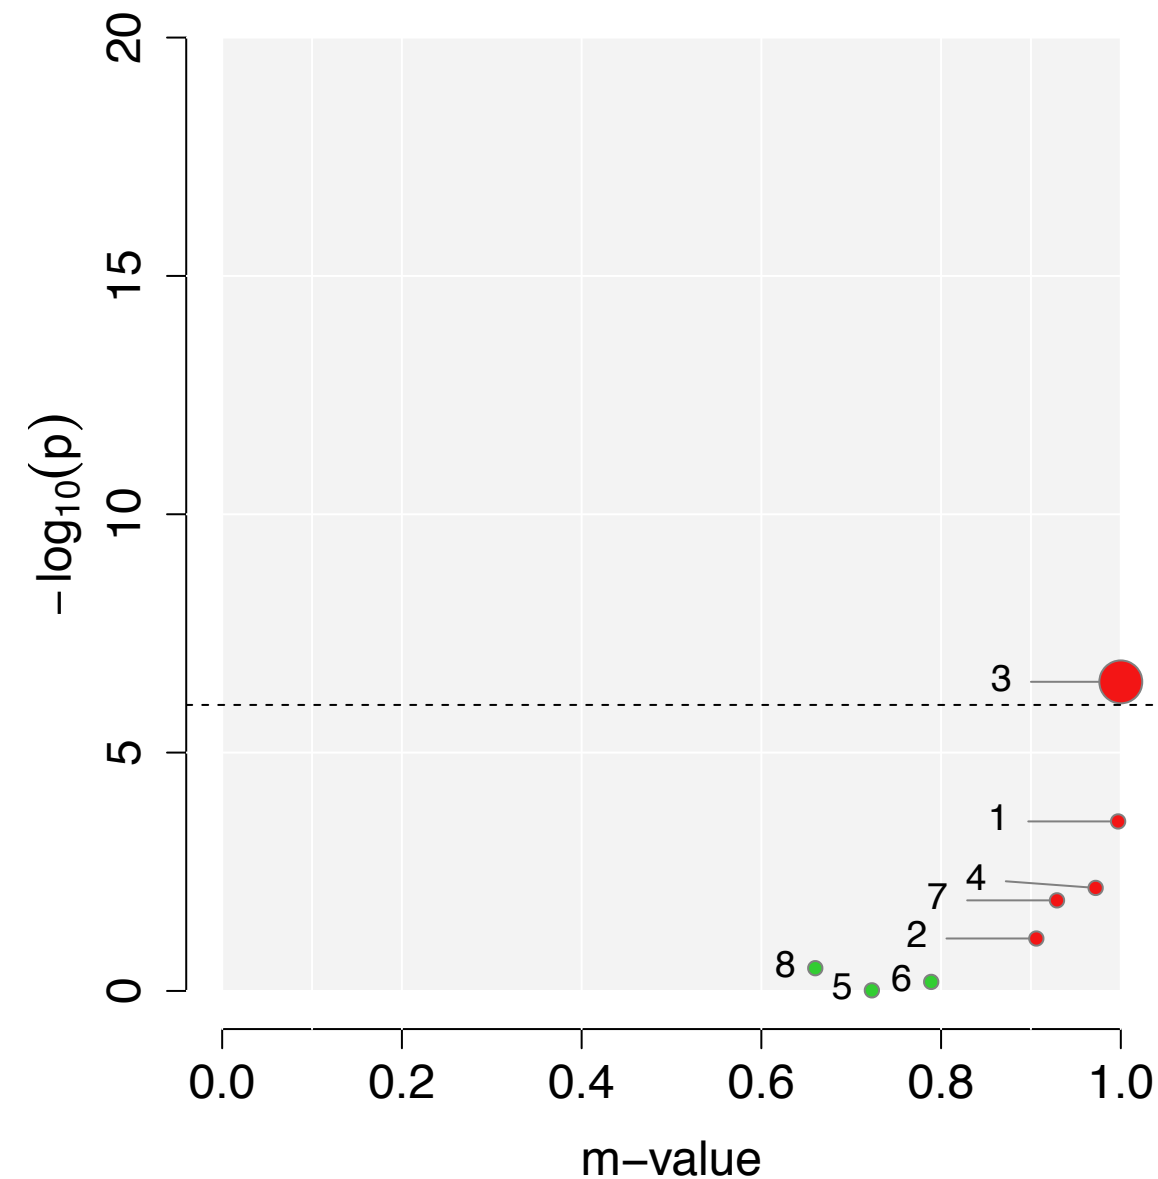

rs140505938 (Meta  $P = 2.42 \times 10^{-12}$ )

Gene : *VPS45*, *OTUD7B*

GWAS P-value

- 1.05 x 10<sup>-9</sup> ● 1.SCZ
- 7.00 x 10<sup>-7</sup> ● 2.BIP
- 0.0671 ● 3.MD
- 0.1240 ● 4.ASD
- 0.4839 ● 5.ADHD
- 0.5130 ● 6.TS
- 0.6462 ● 7.ANO
- 0.0053 ● 8.OCD

FE summary

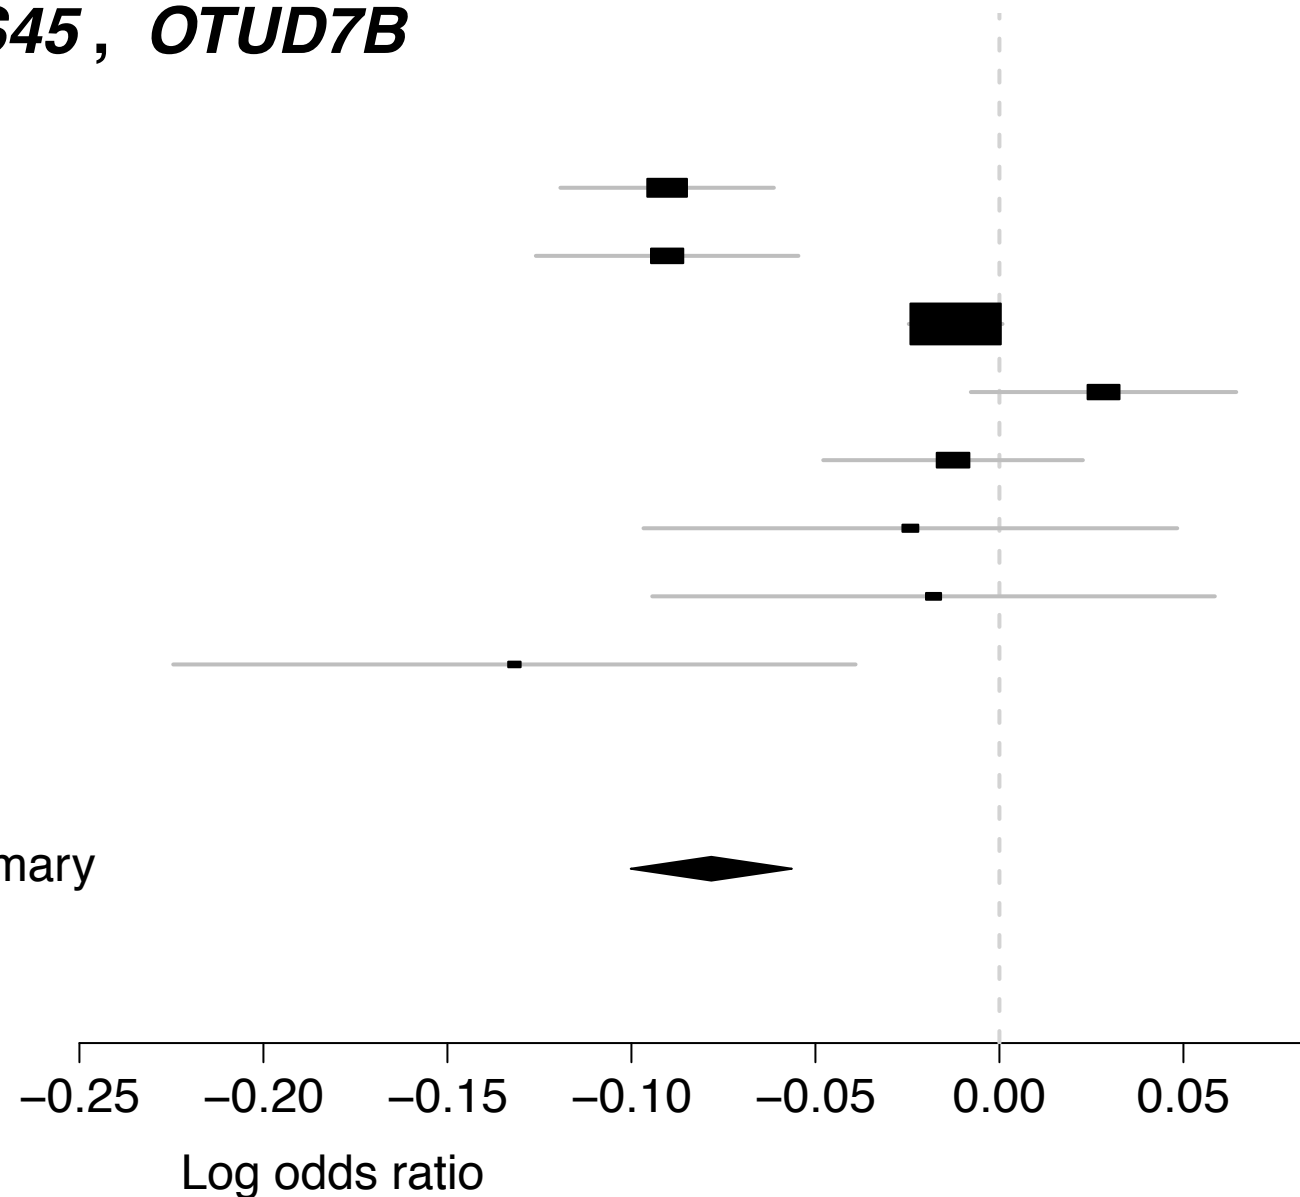

PM-Plot

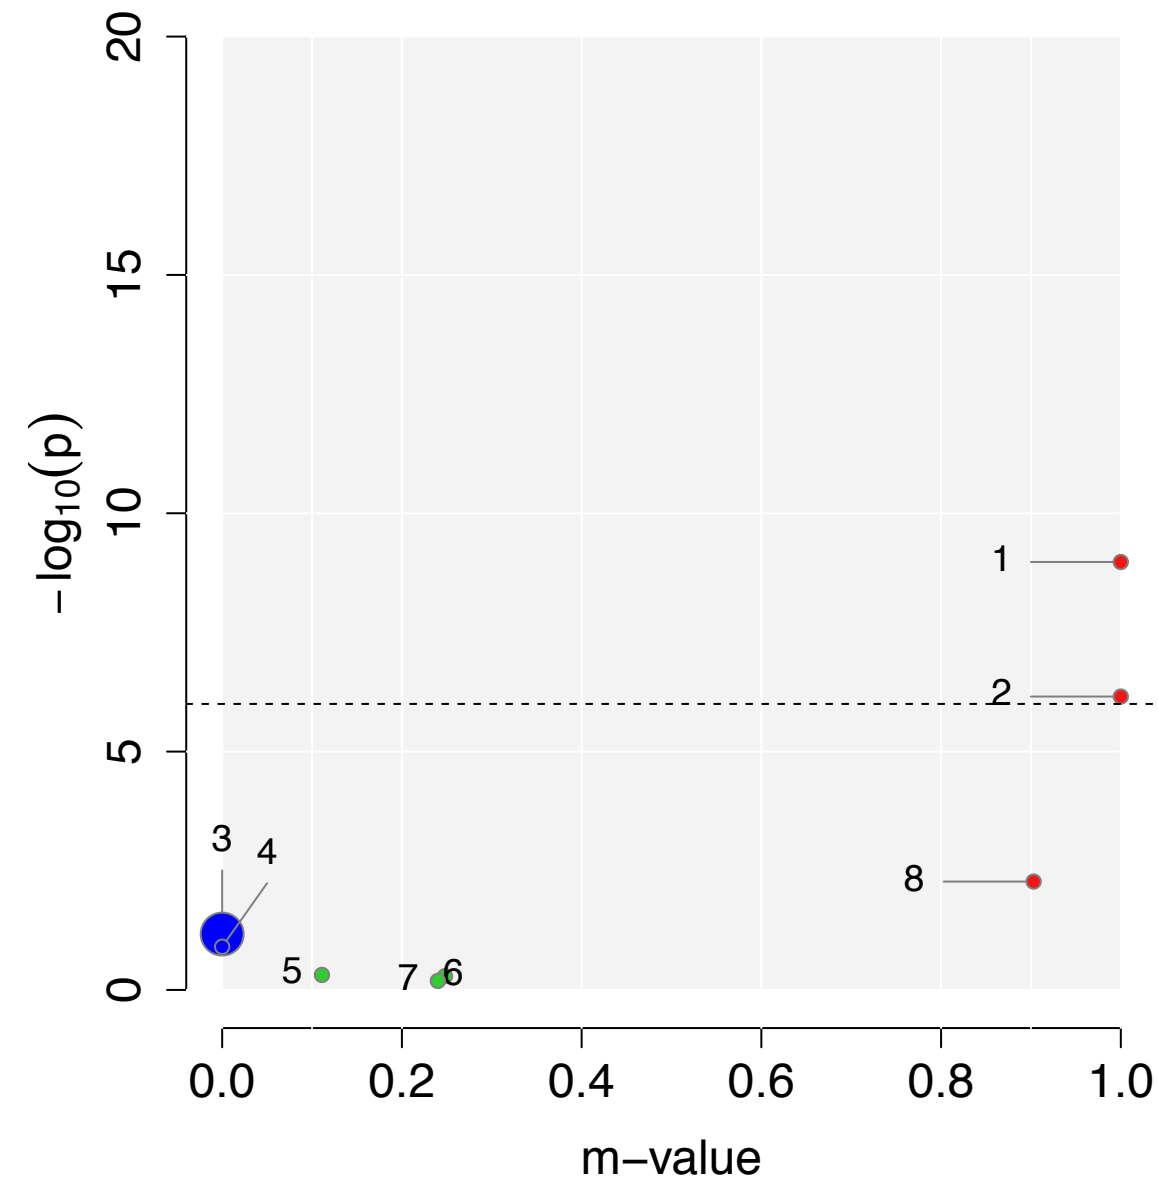



# rs142462188 (Meta $P = 9.68 \times 10^{-9}$ )

Gene : (>200kb)

## GWAS P-value

- $3.57 \times 10^{-5}$  ● 1.SCZ
- 0.0810 ● 2.BIP
- $1.20 \times 10^{-6}$  ● 3.MD
- 0.0321 ● 4.ASD
- 0.3491 ● 5.ADHD
- 0.3334 ● 6.TS
- 0.6775 ● 7.ANO
- 0.1257 ● 8.OCD

FE summary

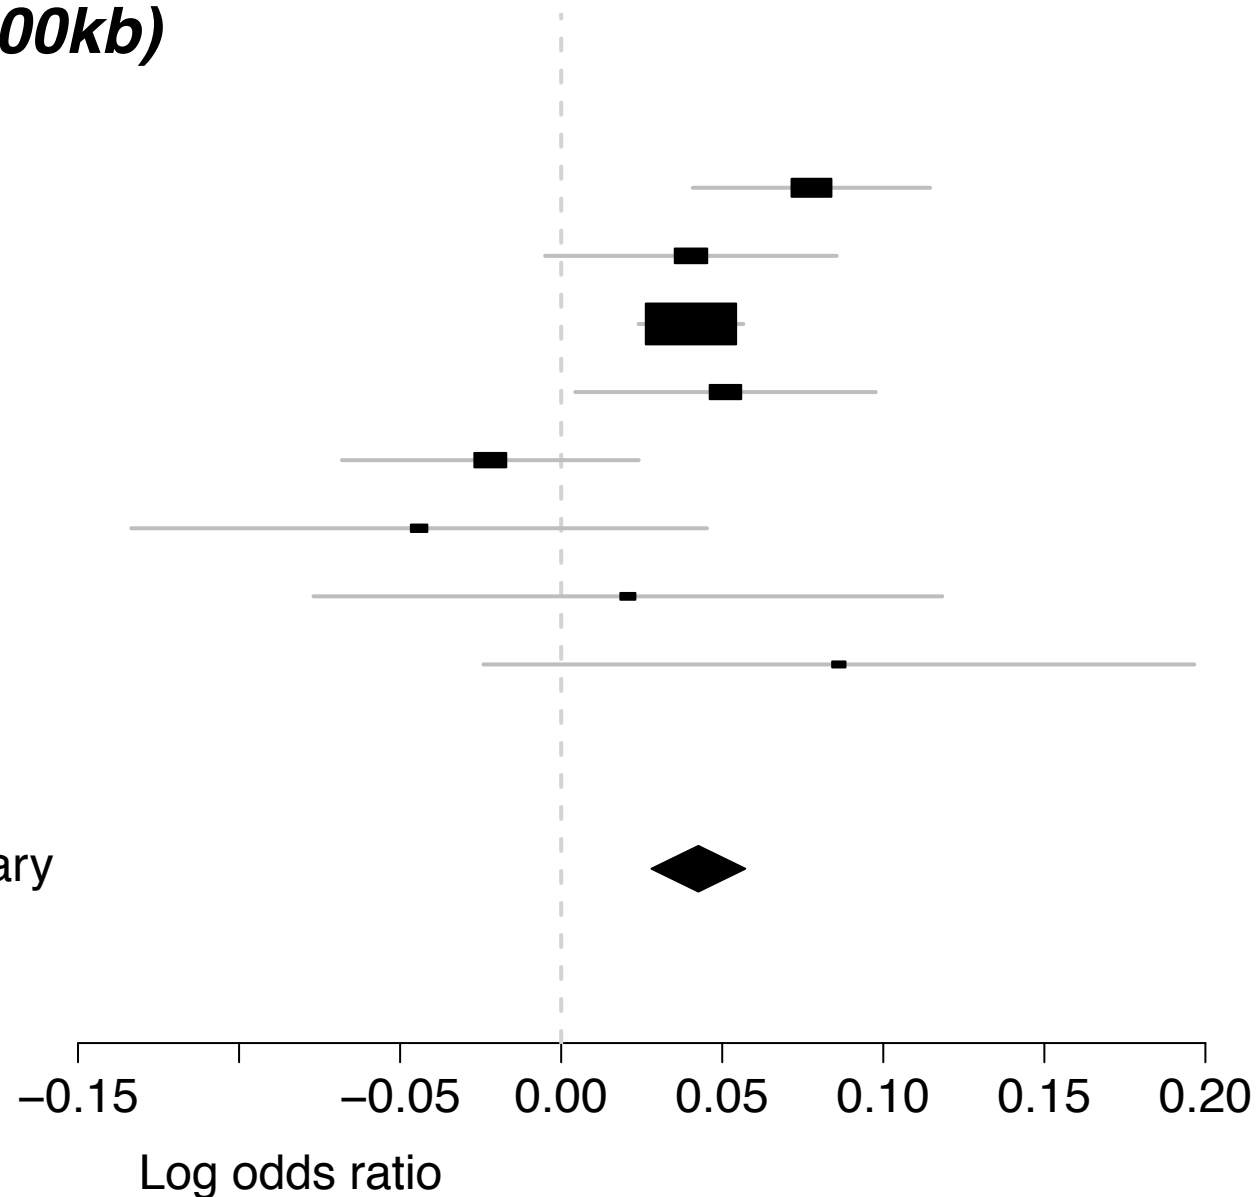

## PM-Plot

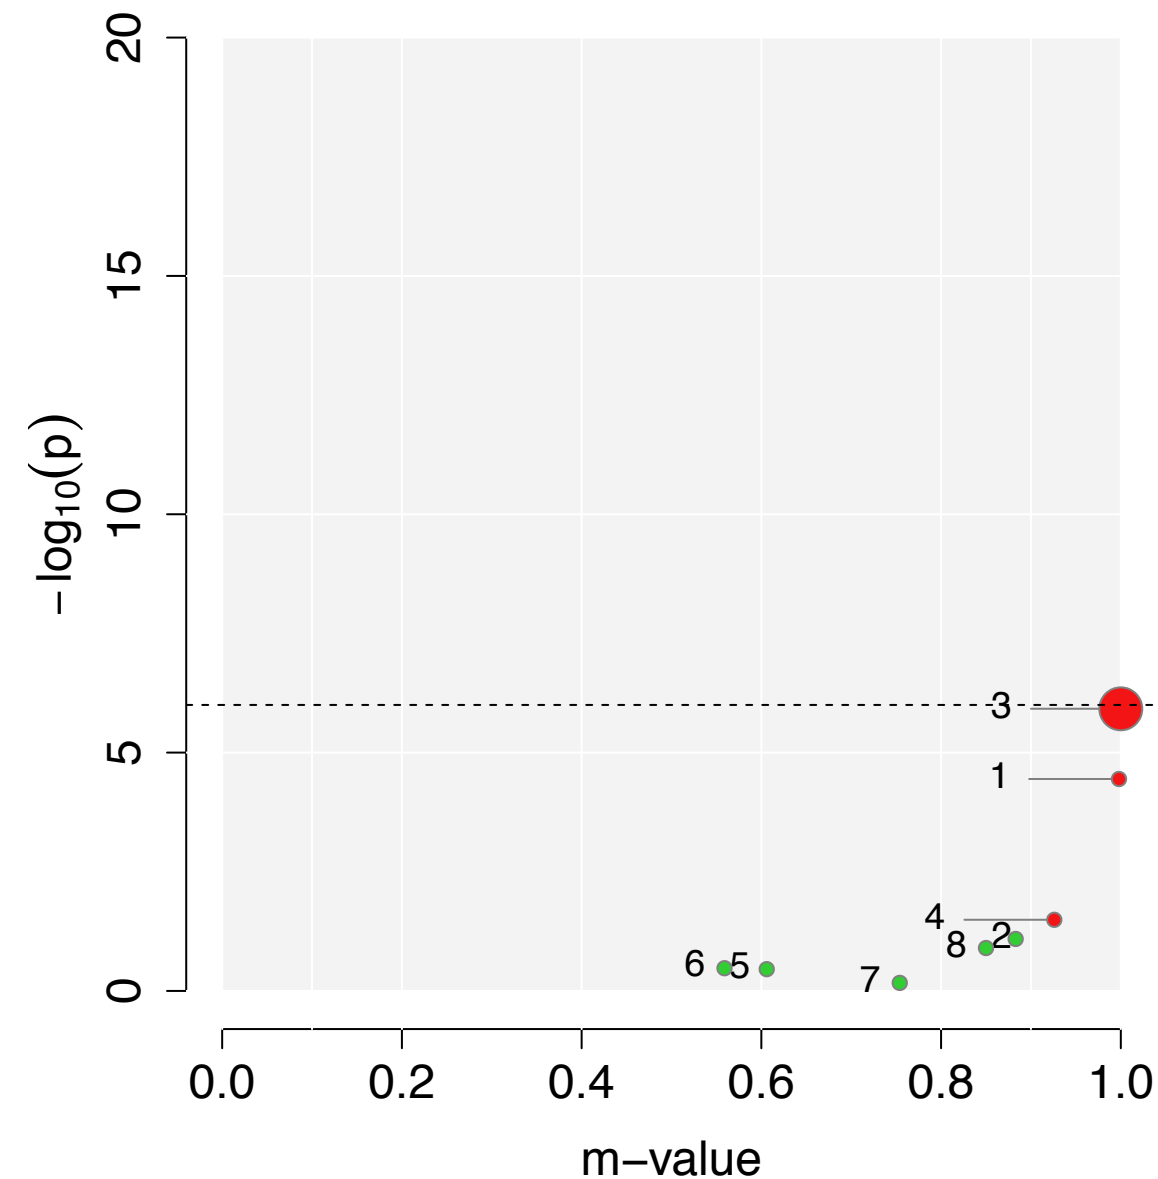

# rs144158419 (Meta $P = 6.89 \times 10^{-9}$ )

Gene : (>200kb)

## GWAS P-value

- 4.15 x 10<sup>-12</sup> ● 1.SCZ
- 0.4760 ● 2.BIP
- 0.1849 ● 3.MD
- 0.1067 ● 4.ASD
- 0.7315 ● 5.ADHD
- 0.1828 ● 6.TS
- 0.2911 ● 7.ANO
- 0.7835 ● 8.OCD

FE summary

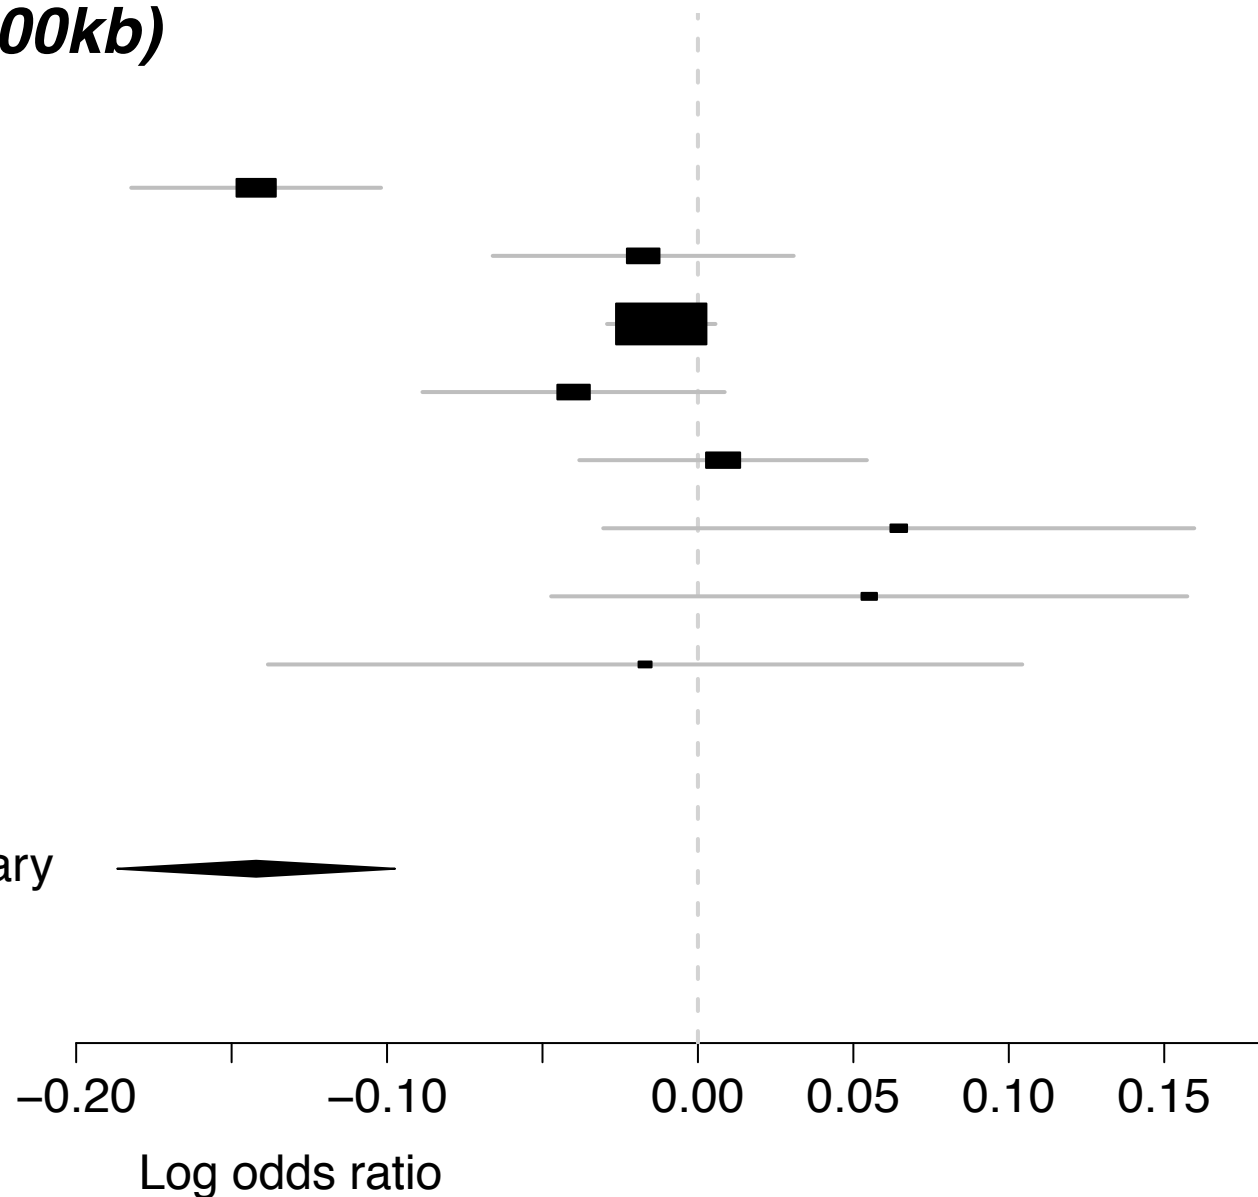

## PM-Plot

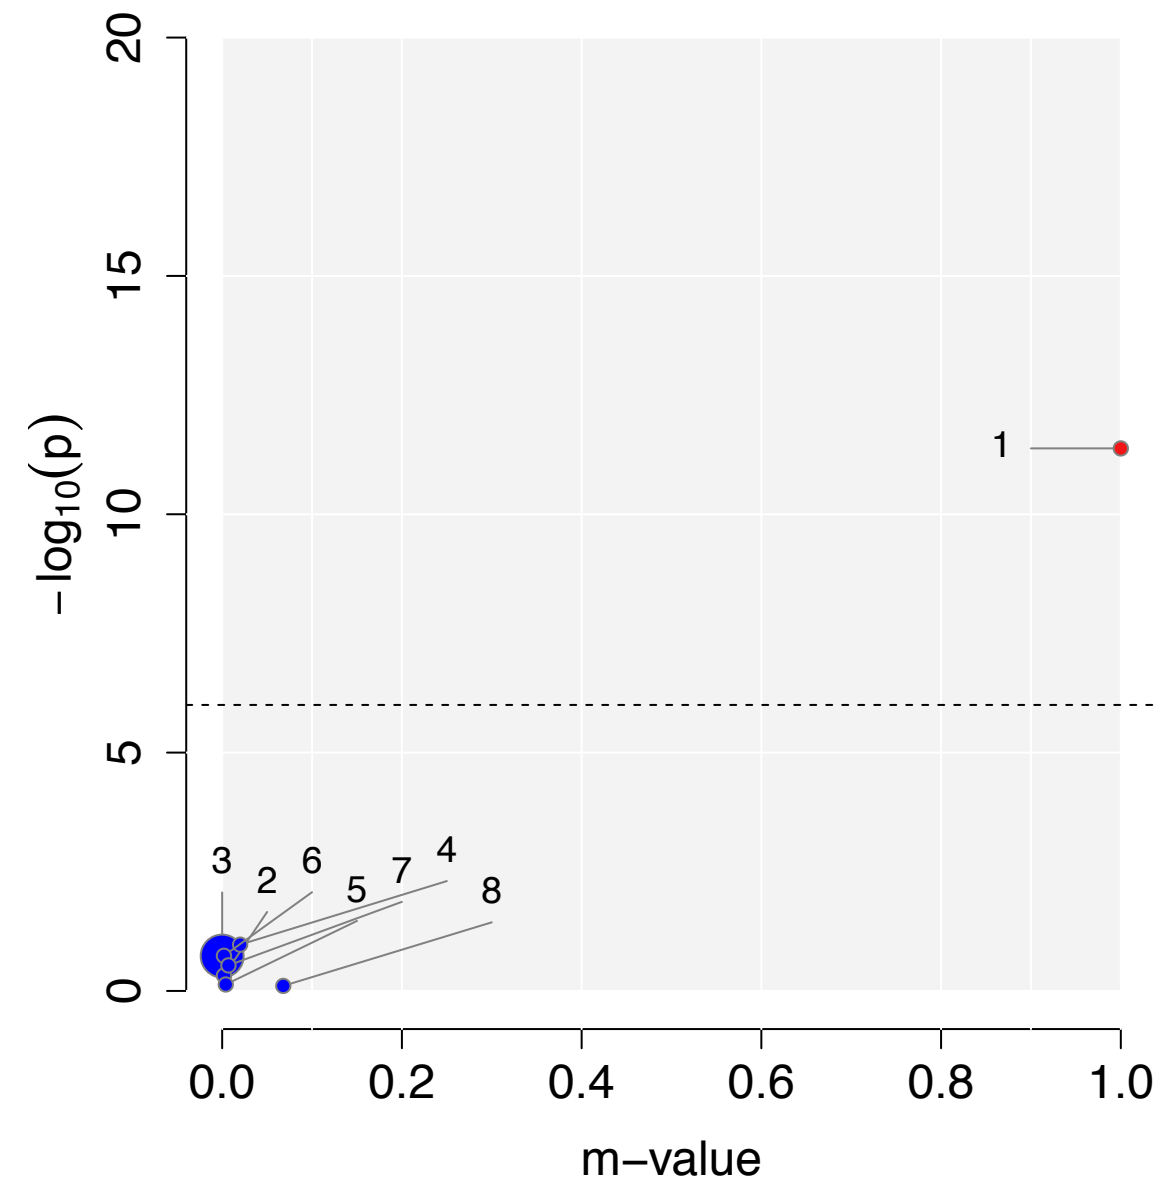

# rs188099135 (Meta $P = 3.05 \times 10^{-8}$ )

Gene : *EPHX2*, *CLU*

## GWAS P-value

- 5.93 x 10<sup>-8</sup> ● 1.SCZ
- 0.3781 ● 2.BIP
- 0.6727 ● 3.MD
- 0.0743 ● 4.ASD
- 0.0005 ● 5.ADHD
- 0.1925 ● 6.TS
- 0.7840 ● 7.ANO
- 0.4992 ● 8.OCD

FE summary

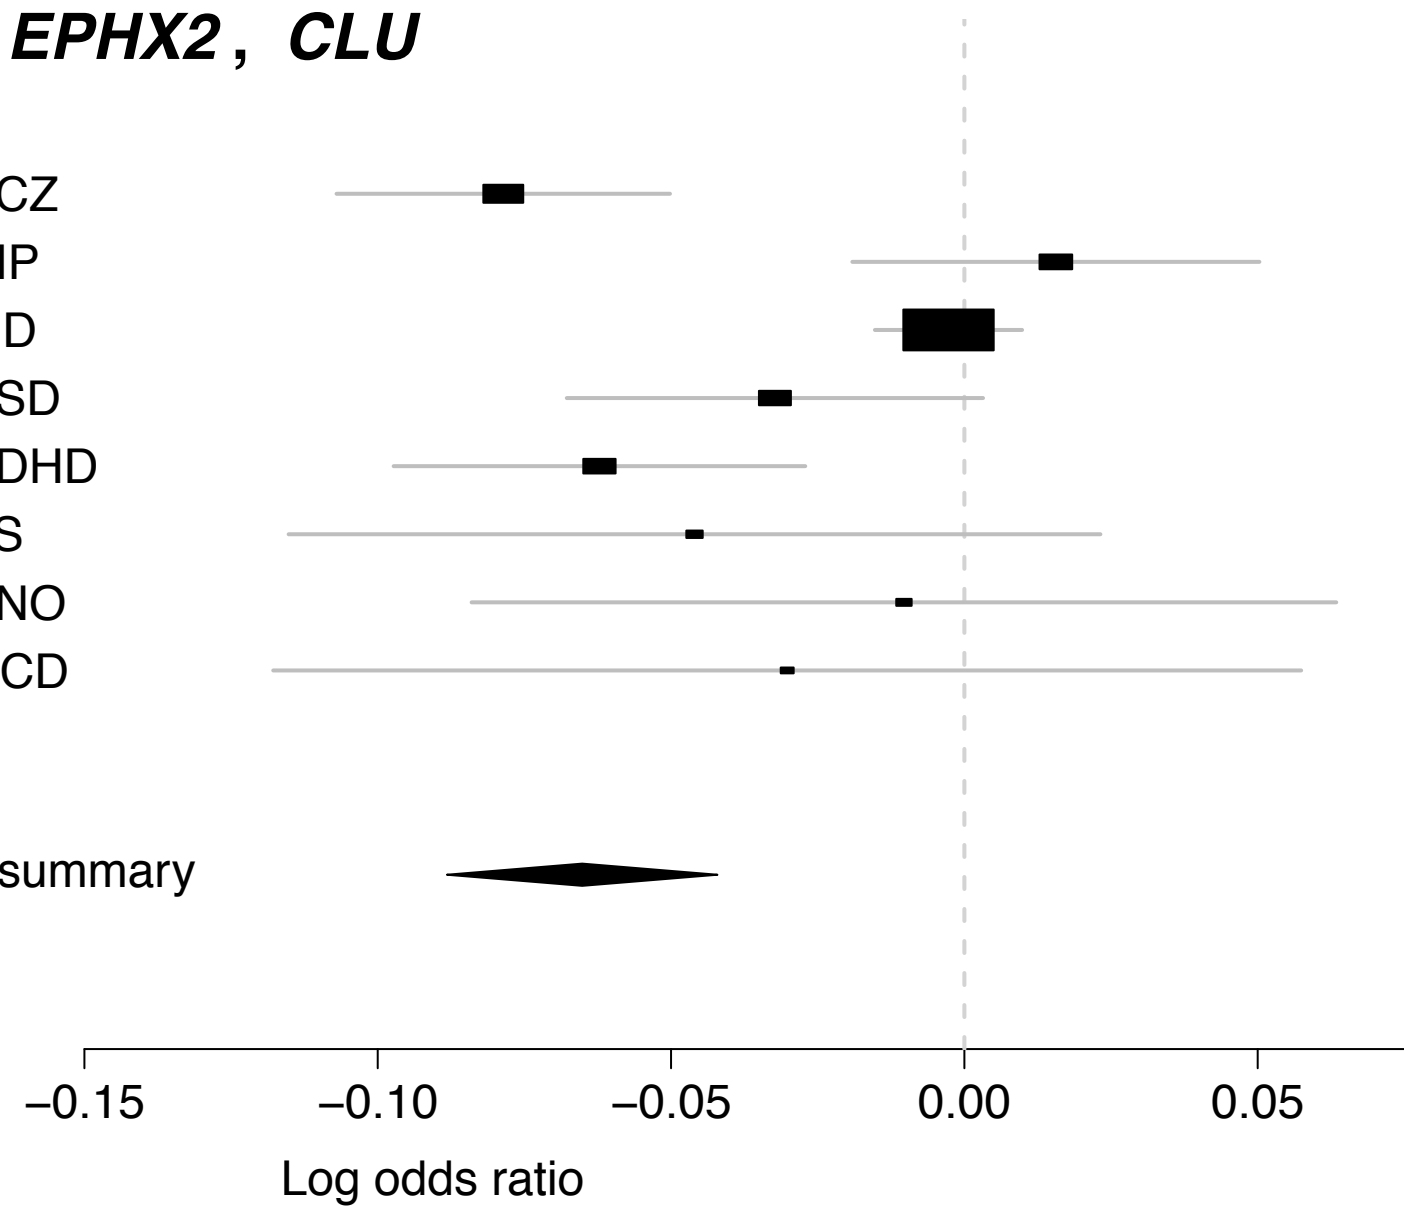

## PM-Plot

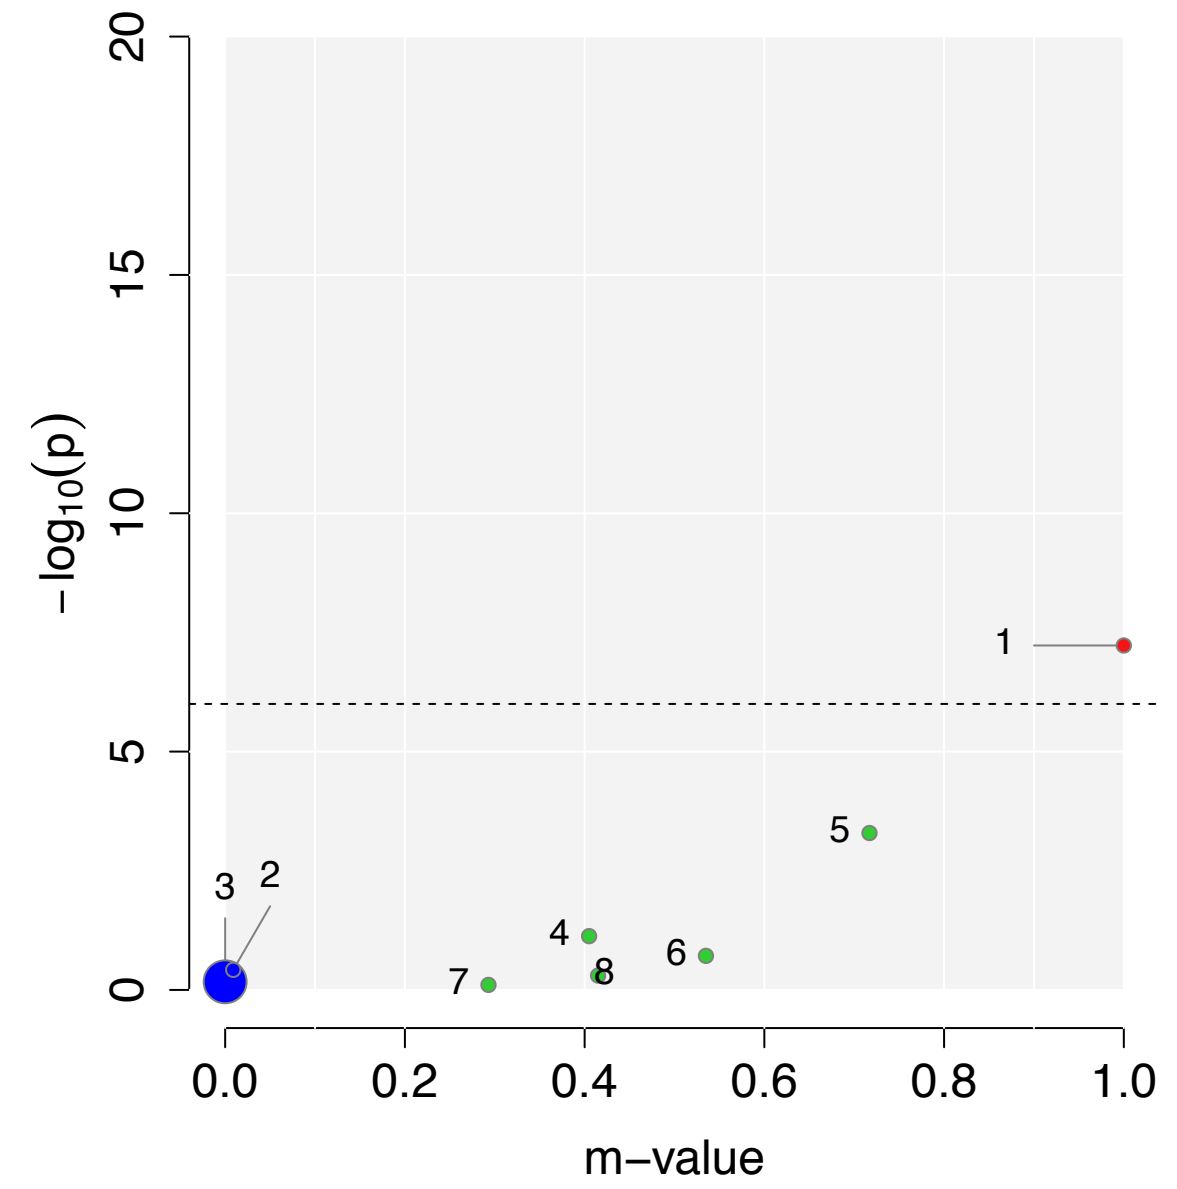

Supplement: NIHMS1065204-supplement-Data_S2.pdf [file NIHMS1065204-supplement-Data_S2.pdf]
