# Supplementary material
Source: PubMed Central journal article supplement (PMC7077032)

## **Supplemental Datafile 1: Analyses related to Main Text Figure 1**

Data S1.1: Hierarchical clustering of genetic architecture across eight neuropsychiatric disorders.

Data S1.2: Relationship between the estimated genetic correlation and the effective sample sizes for each pair of disorders.

Data S1.3: Relationship between the estimated genetic correlation and the effective sample sizes for MD and four other disorders, SCZ, BIP, ADHD, and ASD, in three studies.

Data S1.4: Genomic SEM analysis result using a Weighted Least Squares (WLS) estimator on top (A) and that based on a Maximum Likelihood (ML) estimator (B).

Data S1.5: Distribution of the number of cross-disorder loci identified in meta-analysis of chromosome 1 across 100 simulation replicates.

Fig SD1.1

# Cluster Dendrogram

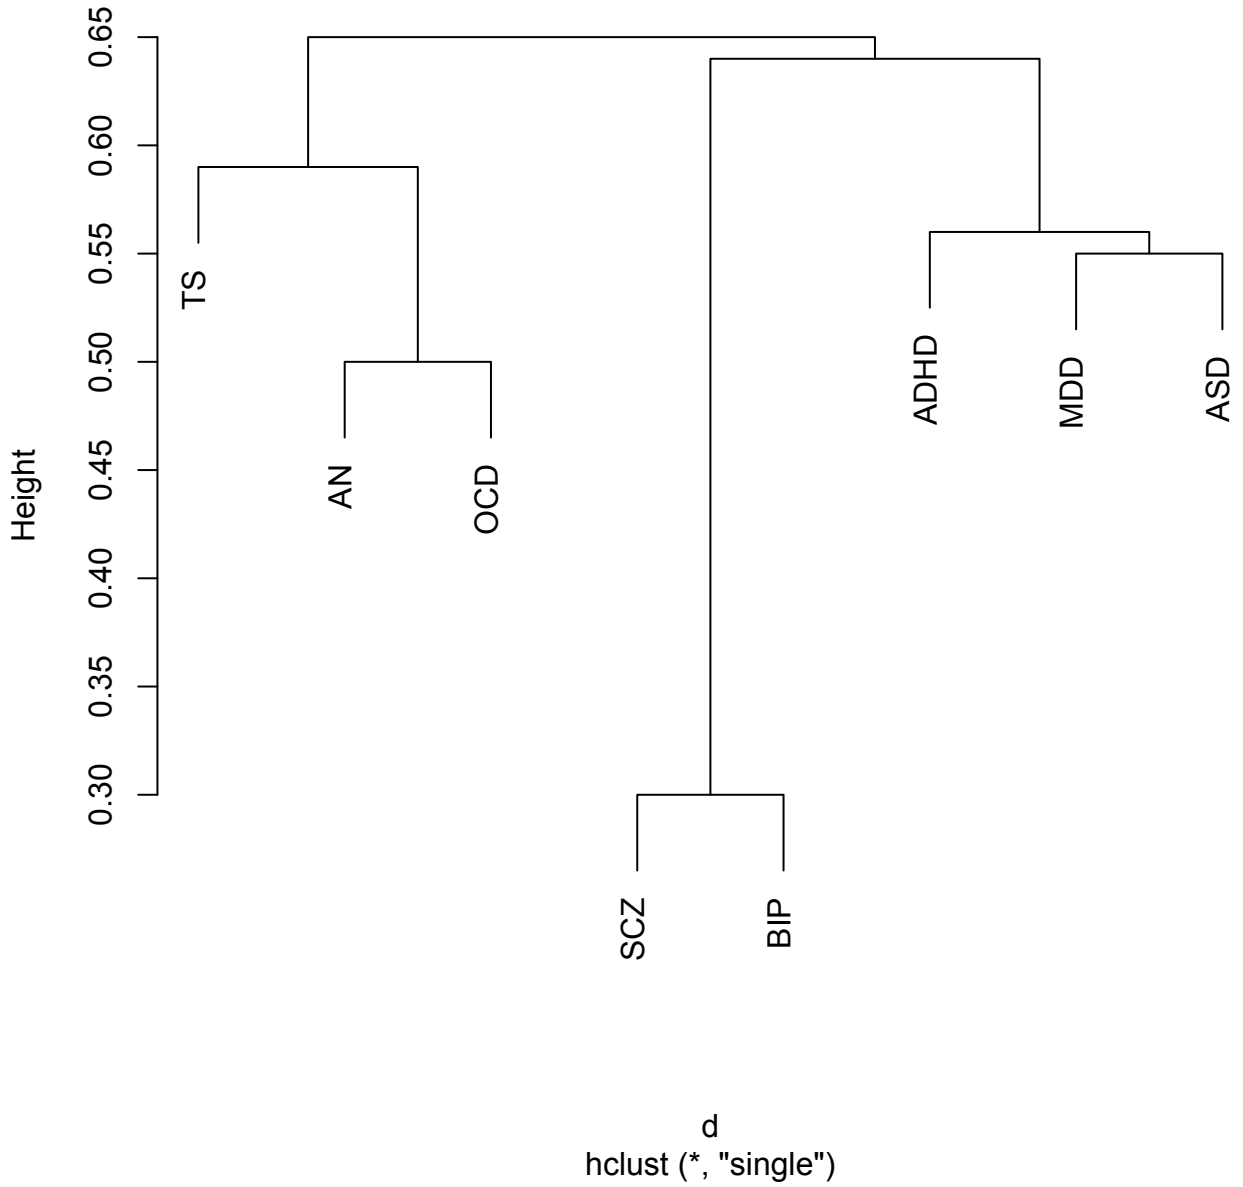

Fig SD1.2

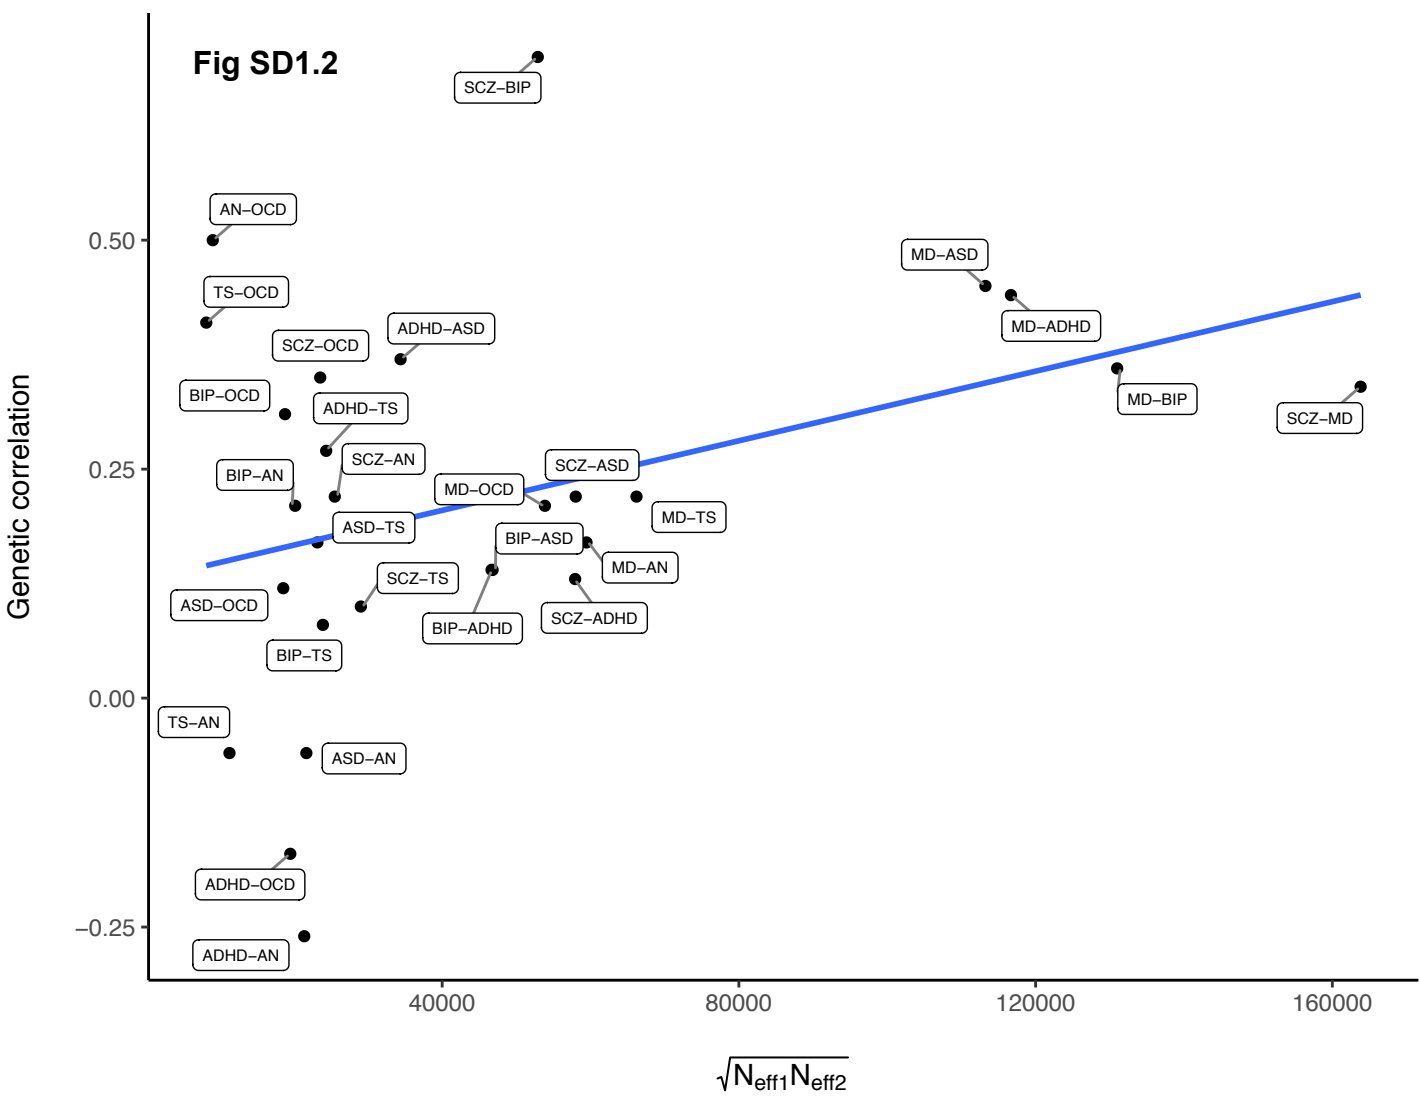

Fig SD1.3

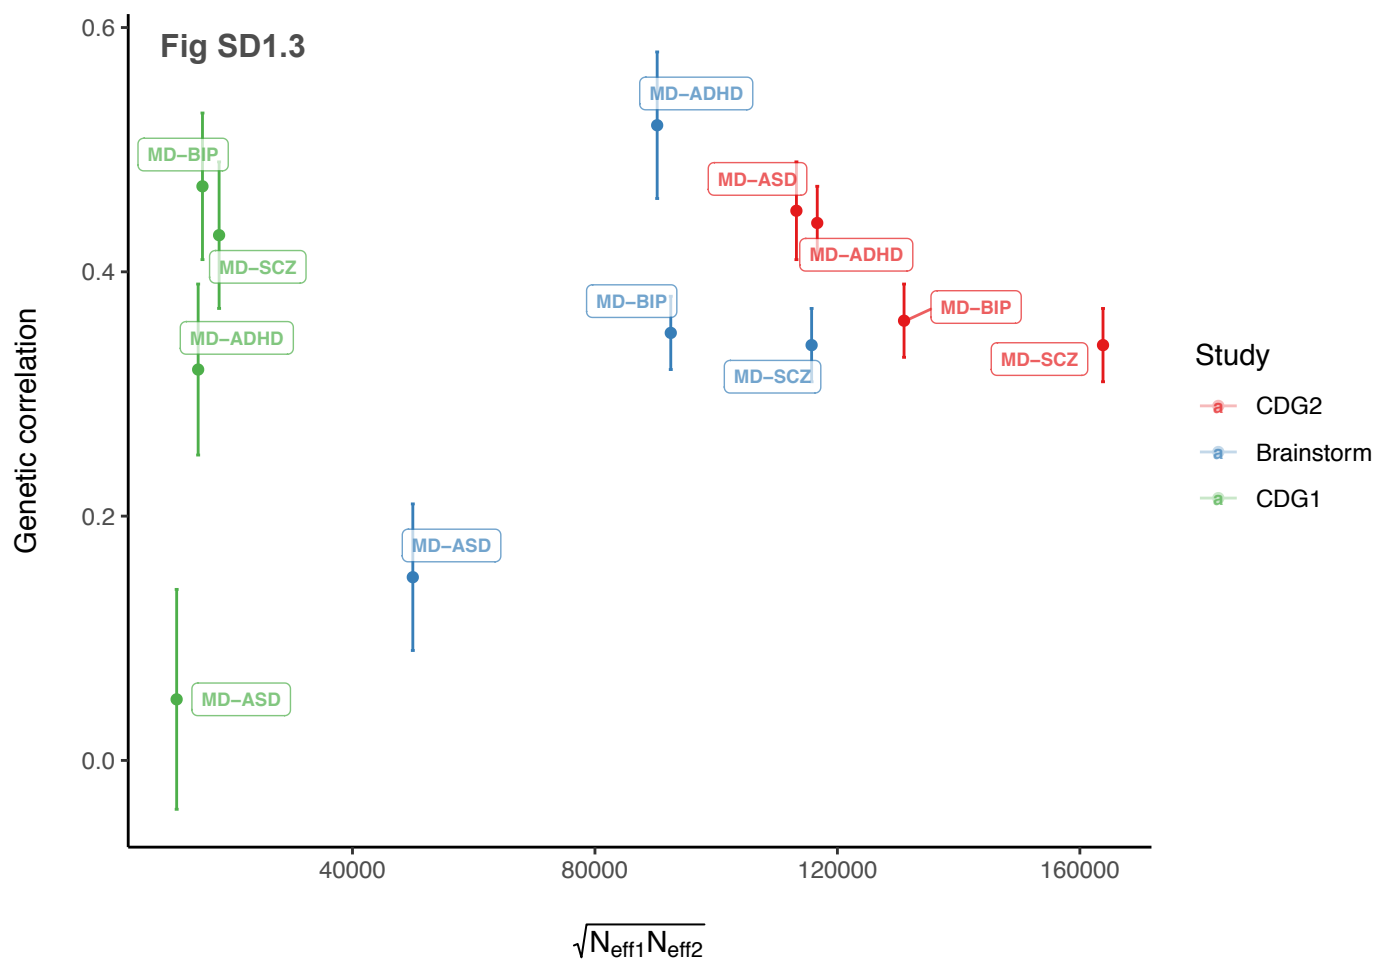

Fig SD1.4

**A**

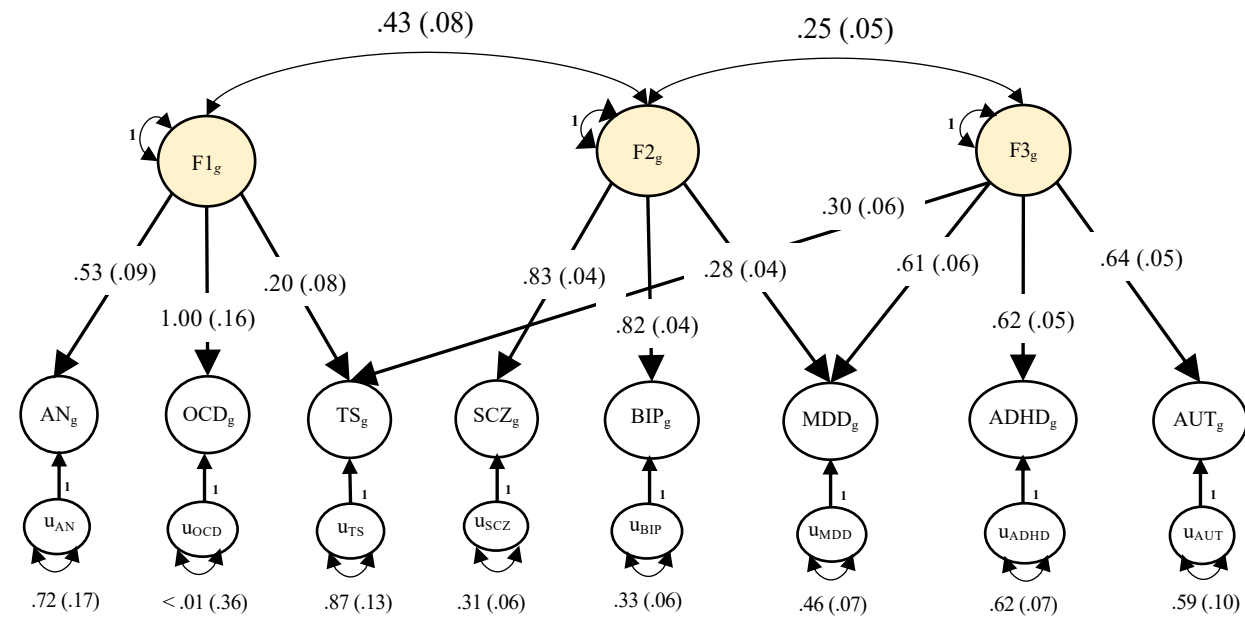

**B**

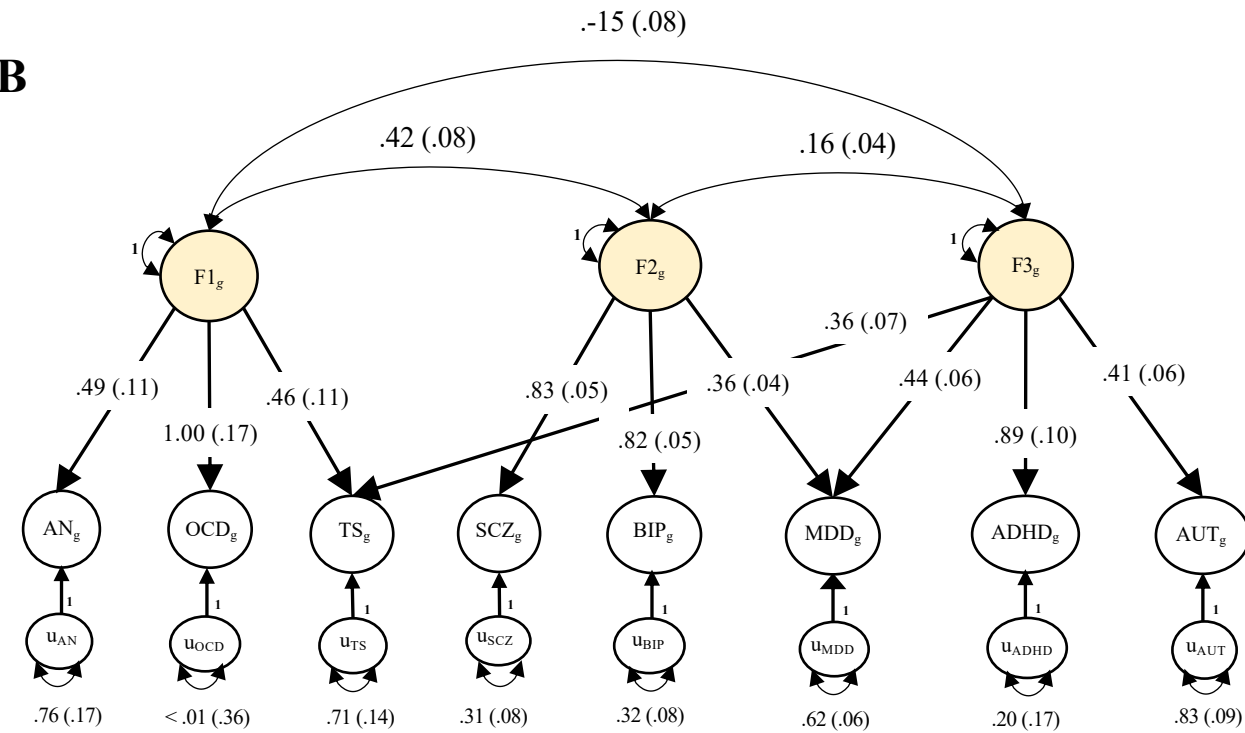

**Fig SD1.5**

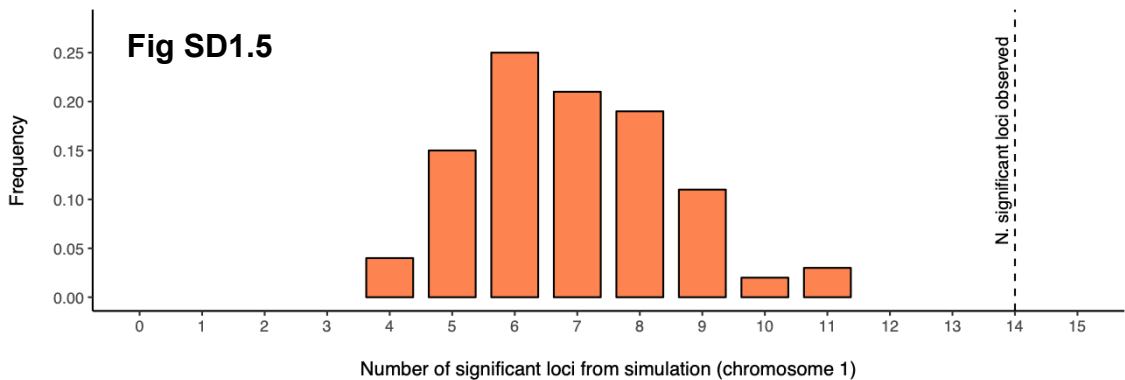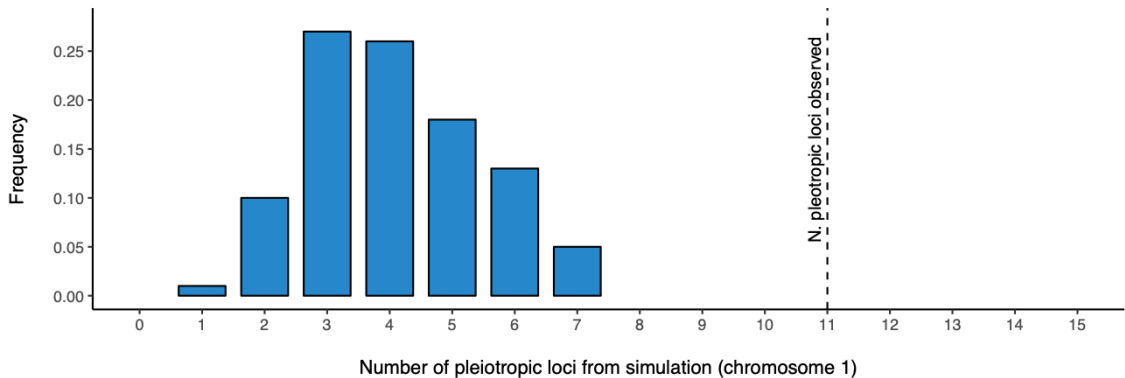

Supplement: NIHMS1065204-supplement-Data_S1.pdf [file NIHMS1065204-supplement-Data_S1.pdf]
