# Supplementary material
Source: PubMed Central journal article supplement (PMC7077032)

**Supplementary Datafile 3: Analyses Related to Discussion and Table S3.1 show the Relationship of Lead SNPs from Meta-analysis to Rare CNVs and Mutations Previously Associated with Neurodevelopmental Genomic Disorders.**

**Data S3.1:** Sentinel SNPs are not overrepresented among genomic disorder loci.

**Data S3.2:** Genes linked to sentinel SNPs are not overrepresented among dominant-acting ASD risk genes.

**Data S3.3:** Genes linked to sentinel SNPs are not enriched for damaging de novo mutations in ASD cases.

Fig SD3.1

### All SNPs

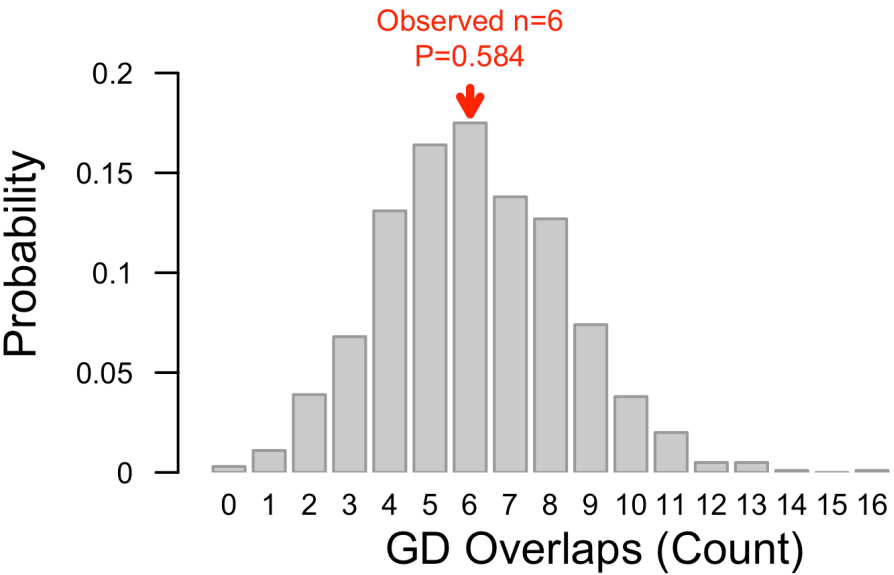

### Disorder-Specific SNPs

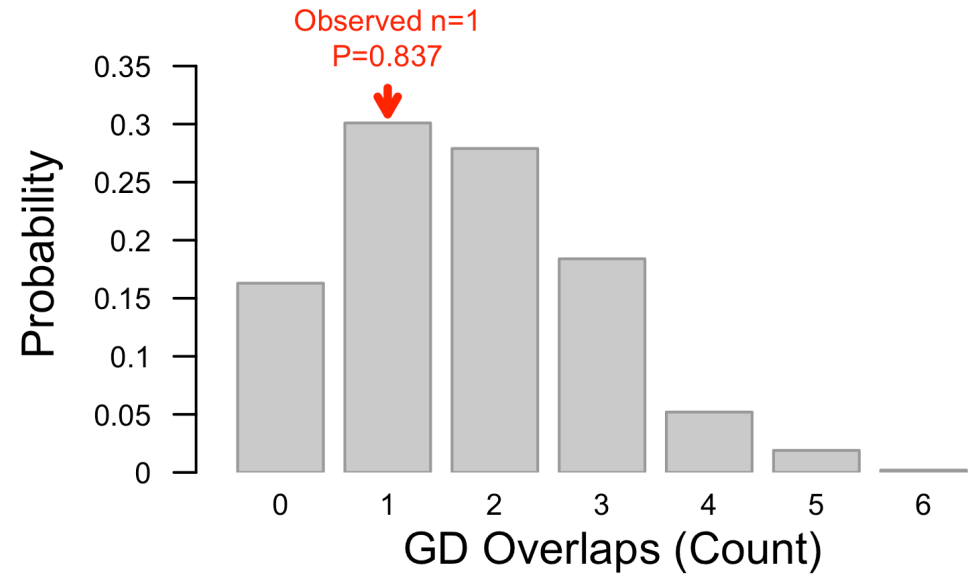

### Pleiotropic SNPs

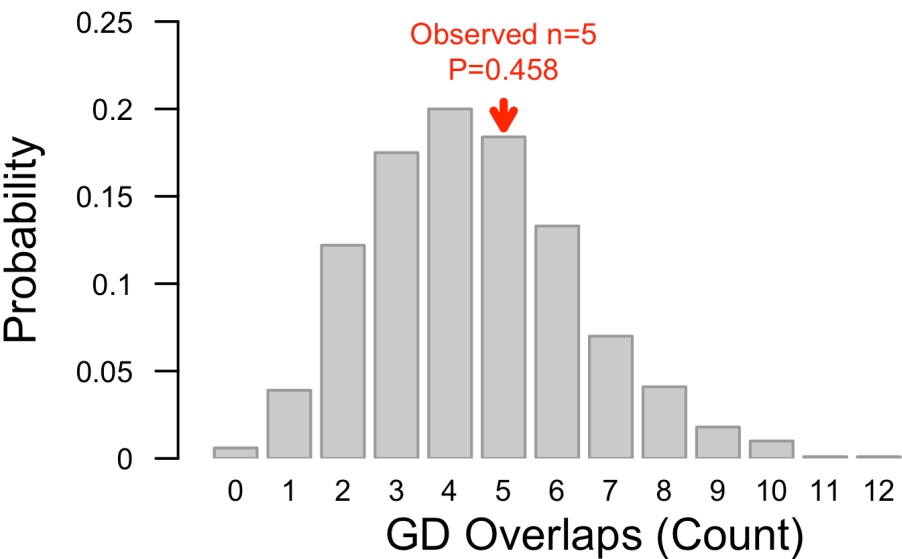

### Highly Pleiotropic SNPs

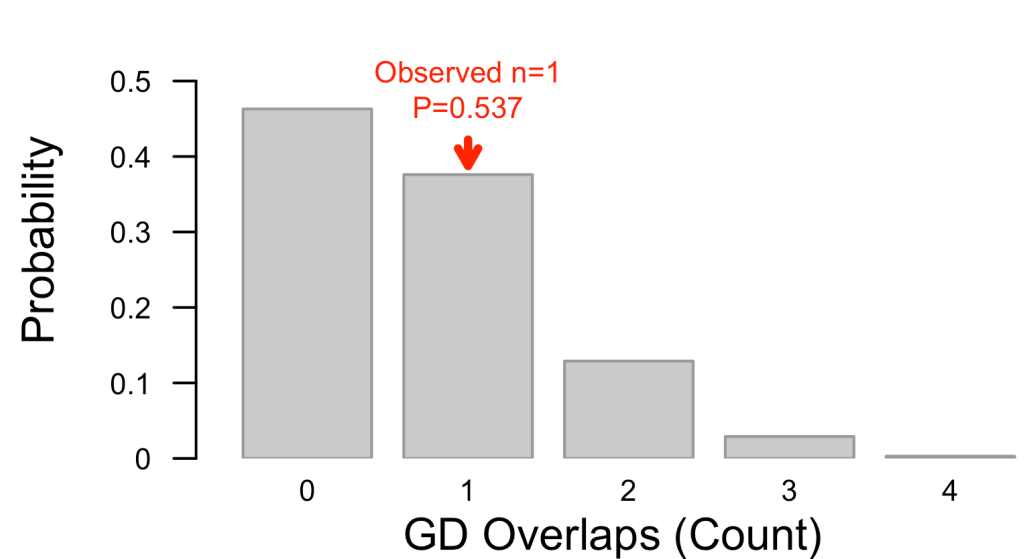

**Fig SD3.2**

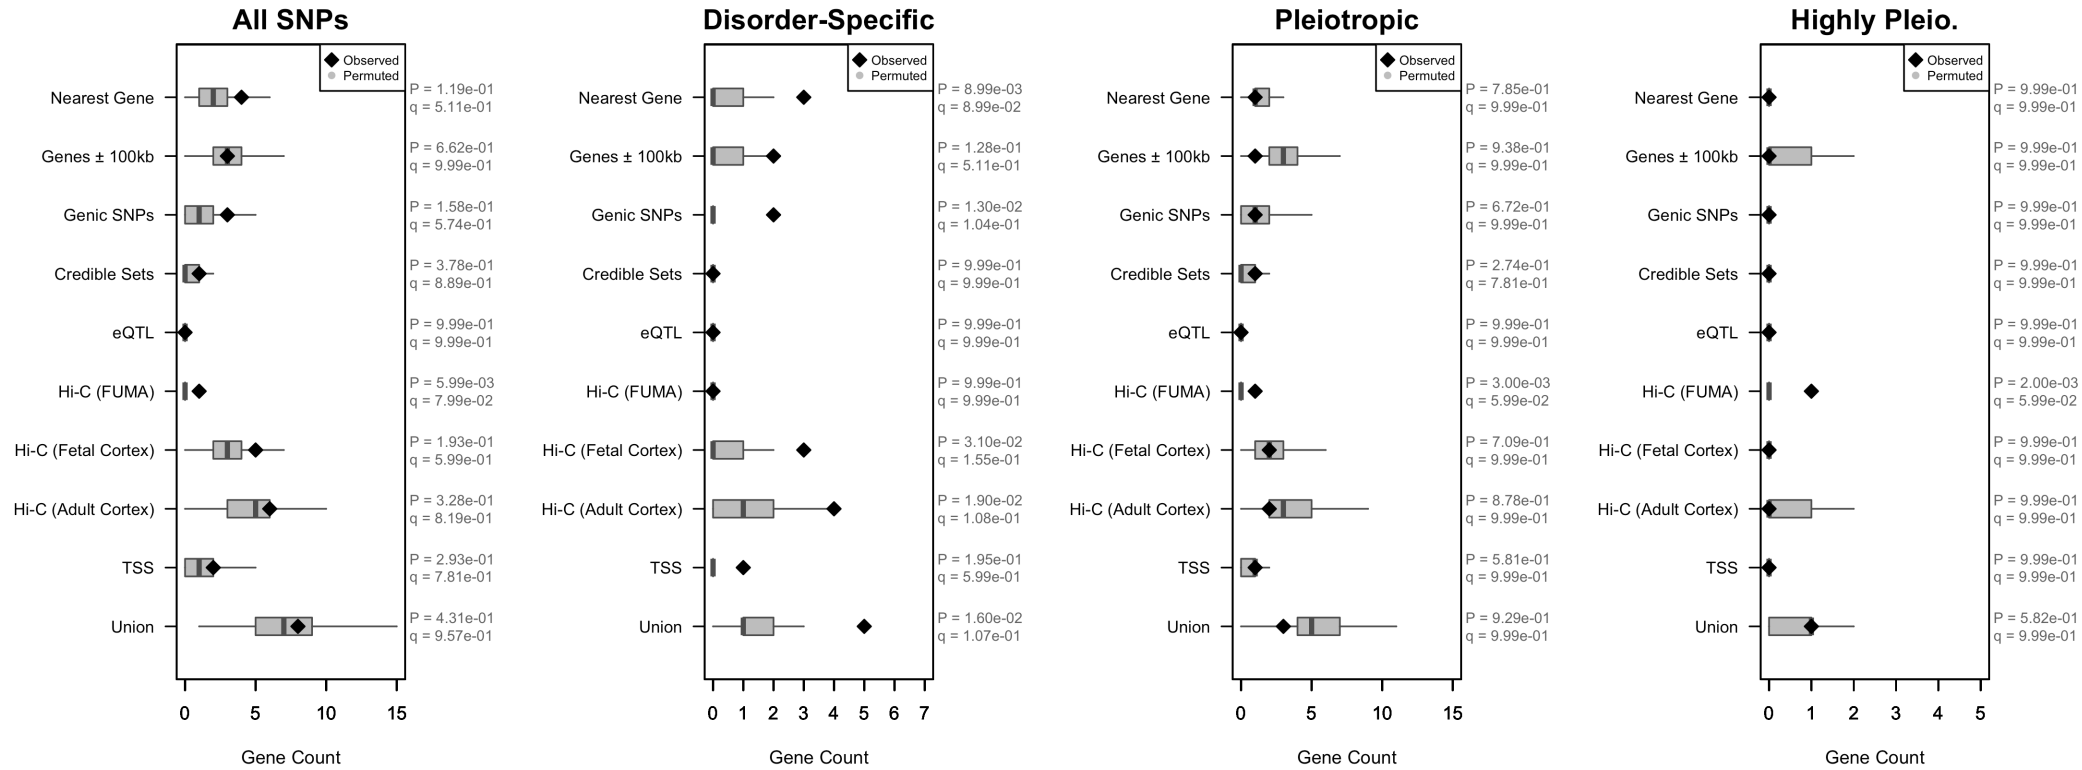

Fig SD3.3

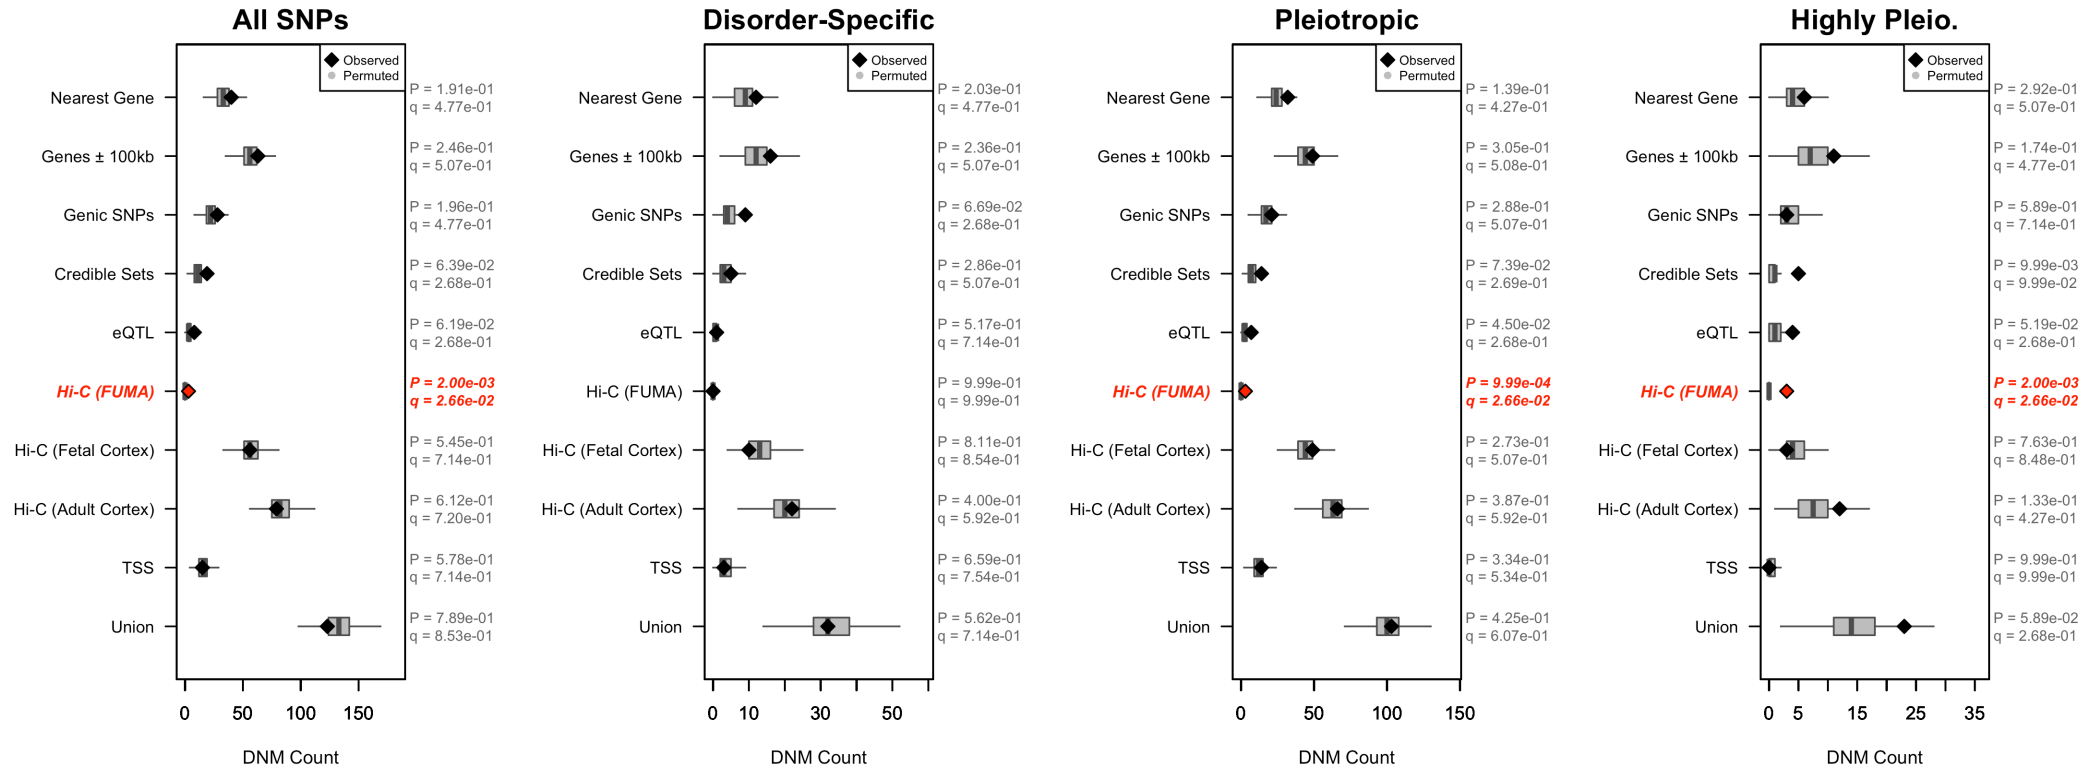

Supplement: NIHMS1065204-supplement-Data_S3.pdf [file NIHMS1065204-supplement-Data_S3.pdf]
