# Supplementary material
Source: PubMed Central journal article supplement (PMC7077032)

Chromosome 18

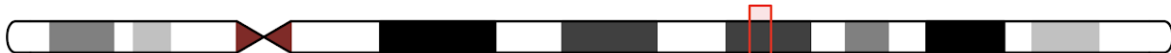

**Fig S2**

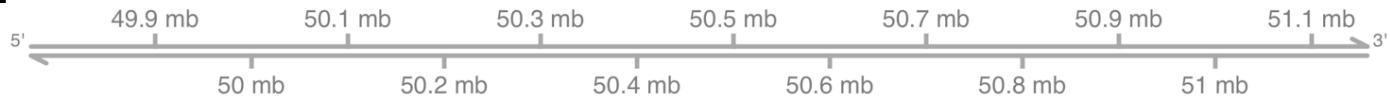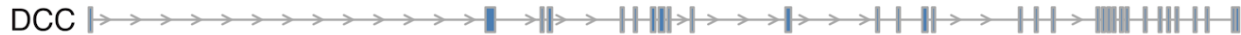

$-\log_{10} P(\text{GWAS})$

10  
8  
6  
4

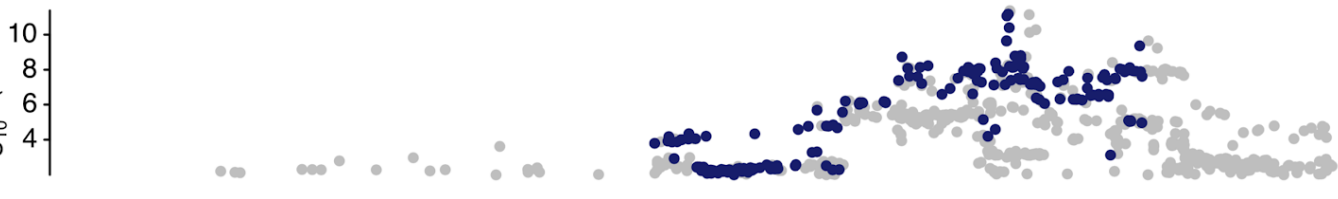

LD

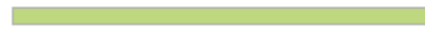

$-\log_{10} P(\text{eQTL})$

8  
7  
6  
5  
4

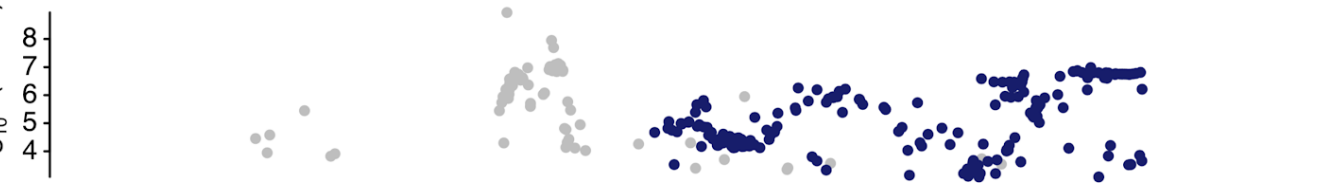

• overlapping SNPs between GWAS and eQTLs for DCC

TAD

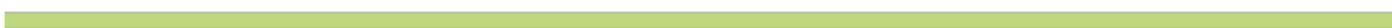

Supplement: NIHMS1065204-supplement-Figure_S2.pdf [file NIHMS1065204-supplement-Figure_S2.pdf]
