# Supplementary material
Source: PubMed Central journal article supplement (PMC7077032)

Fig S1

## Statistical Power and Numbers of Cross-Disorder Associations

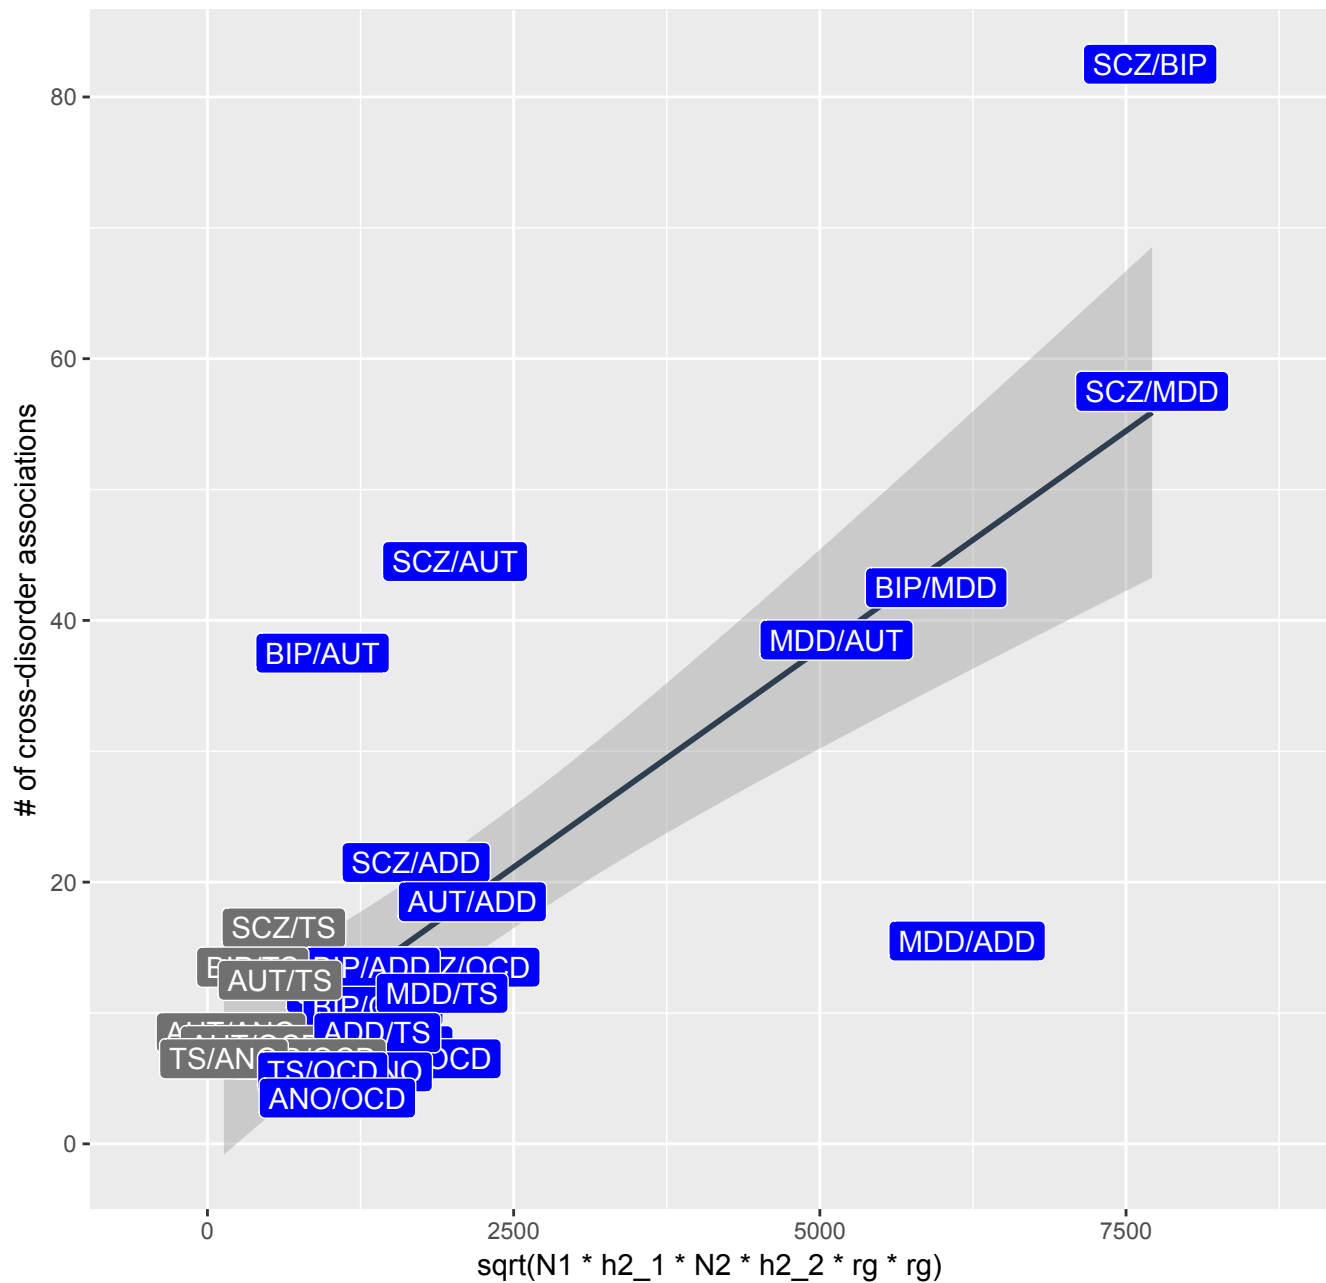

Supplement: NIHMS1065204-supplement-Figure_S1.pdf [file NIHMS1065204-supplement-Figure_S1.pdf]

Fig S3

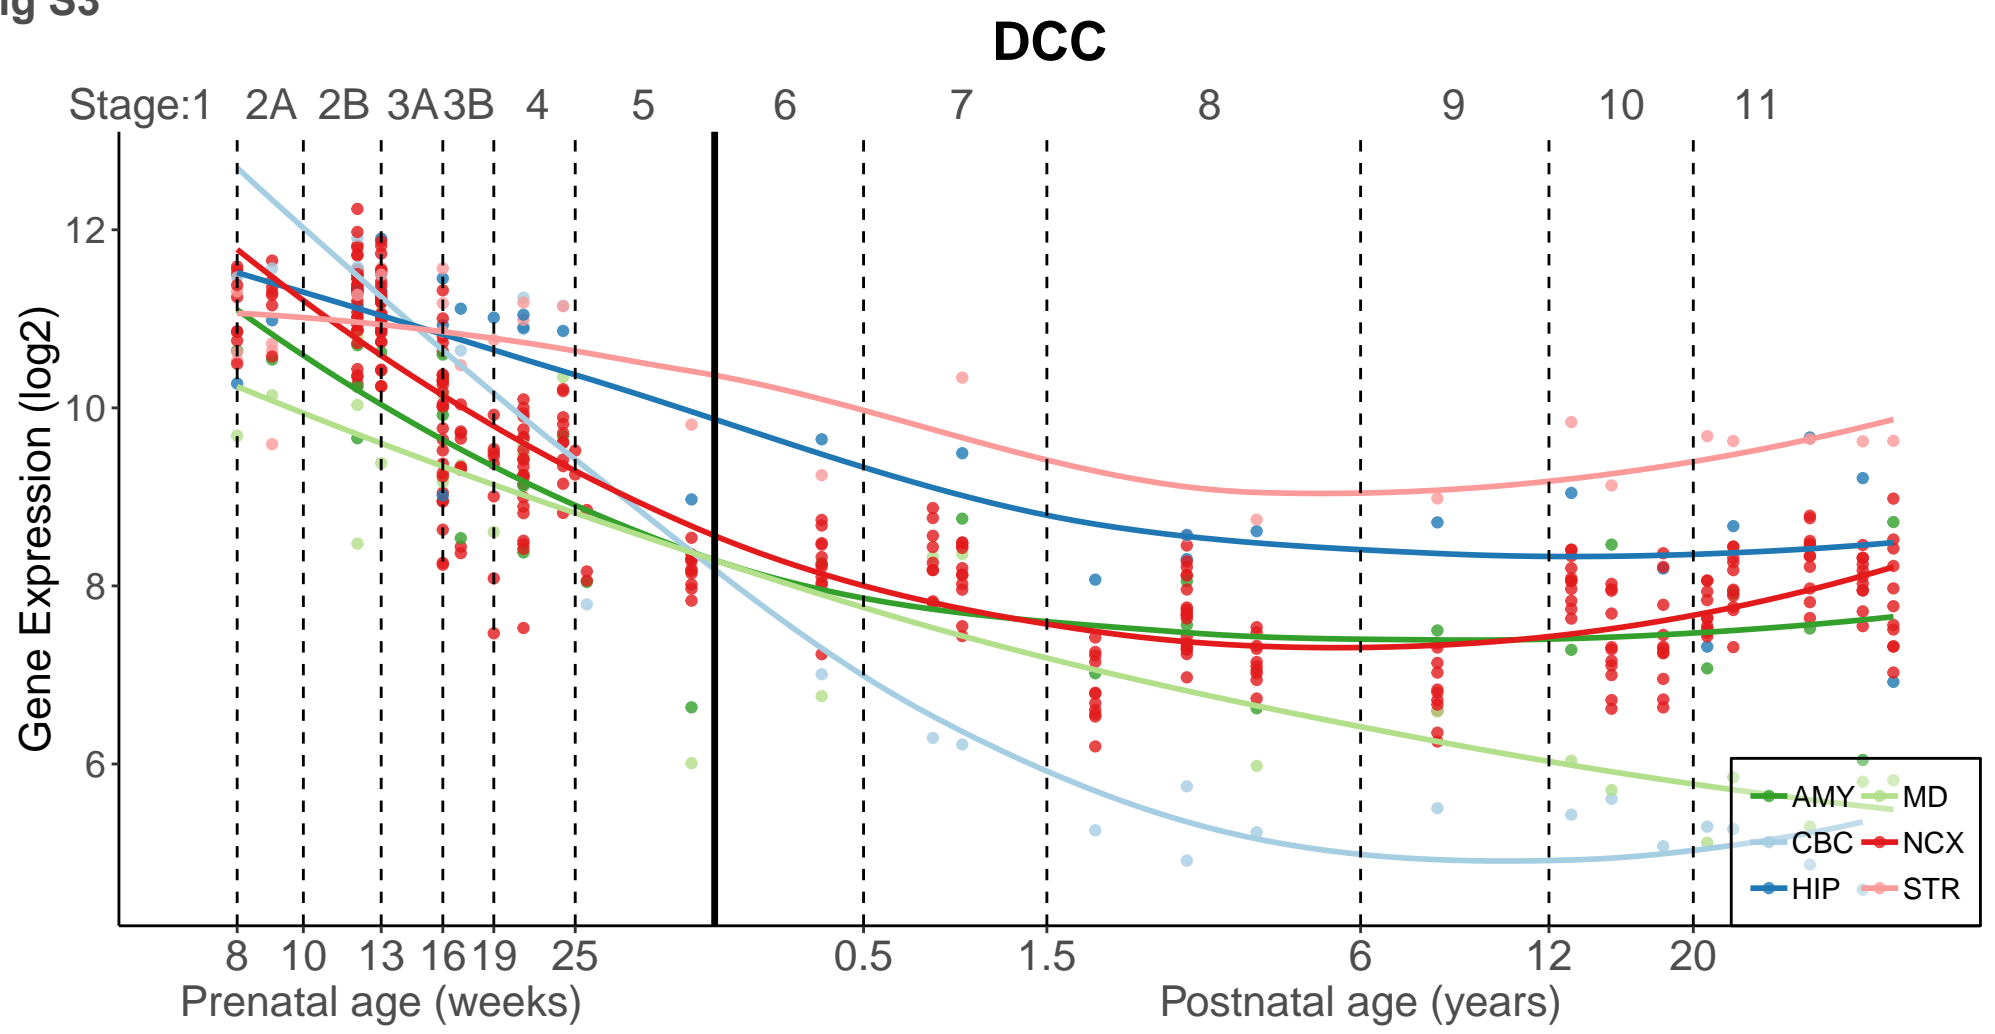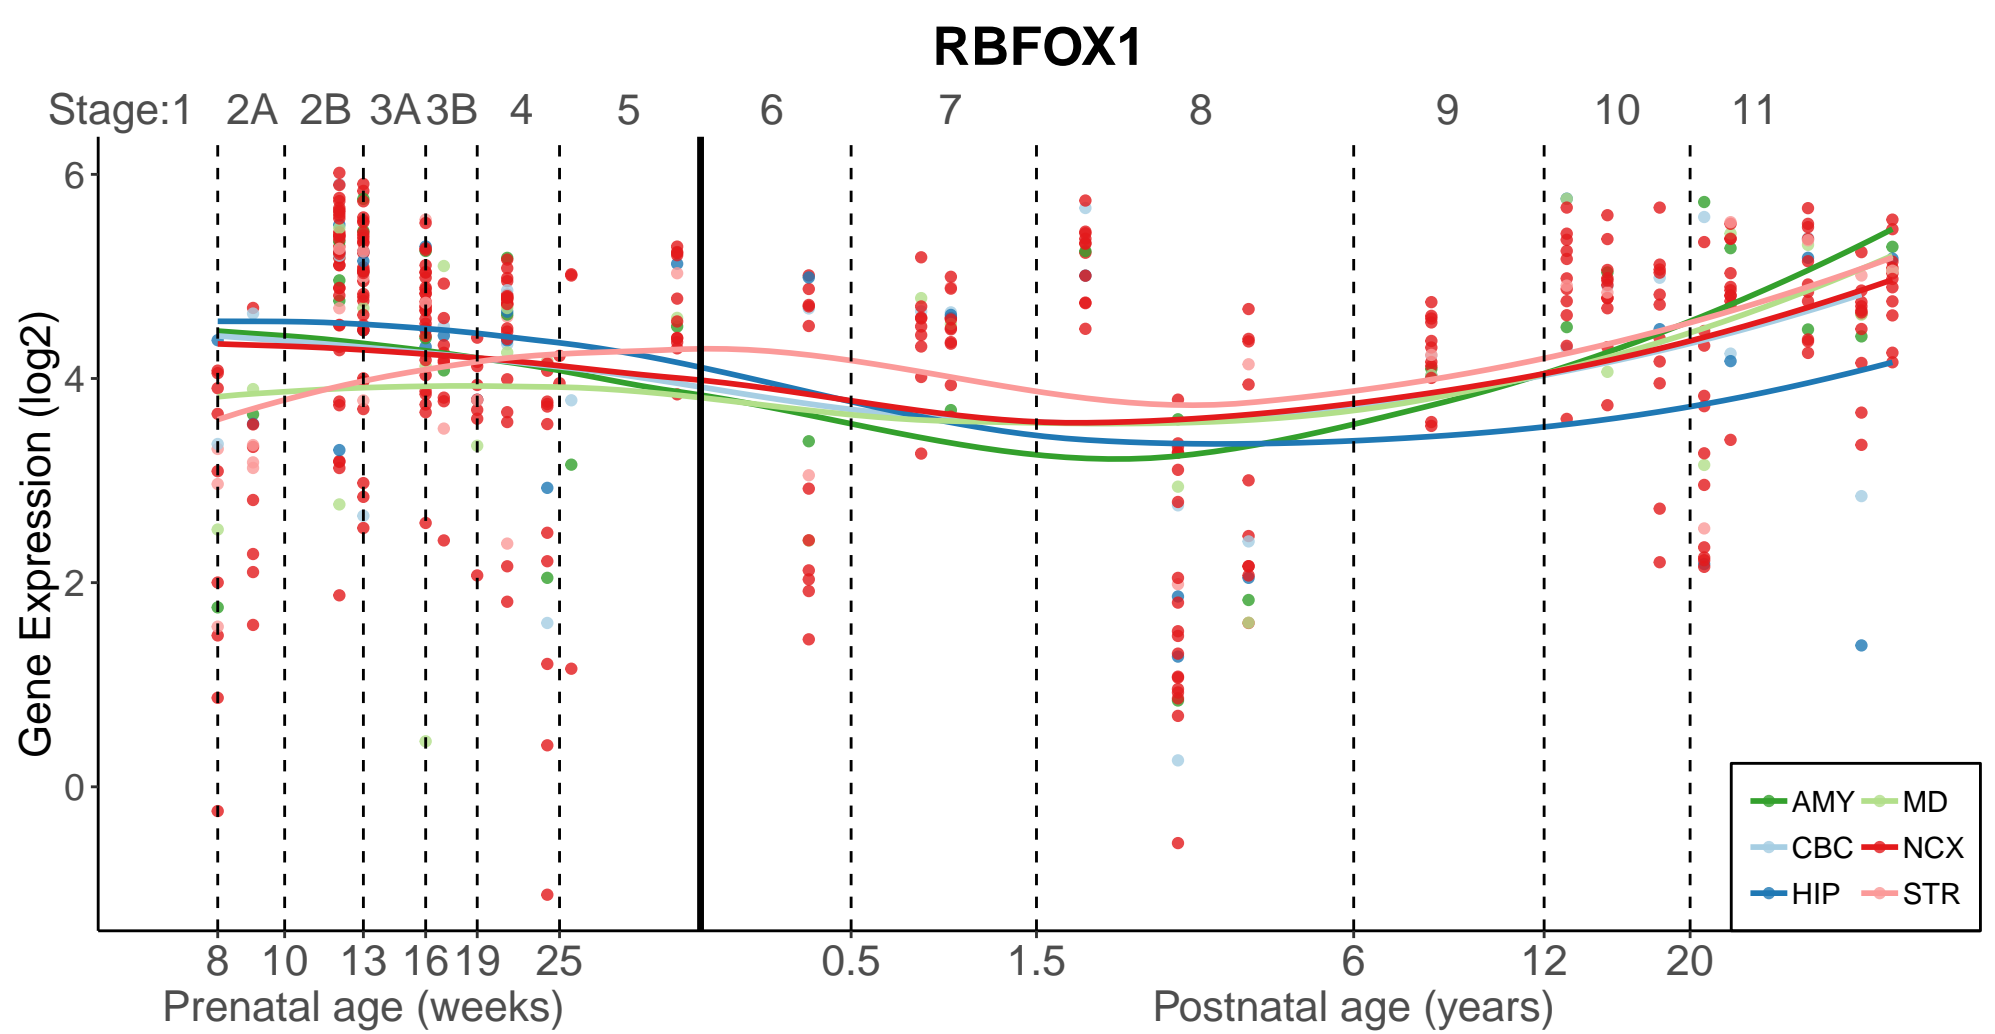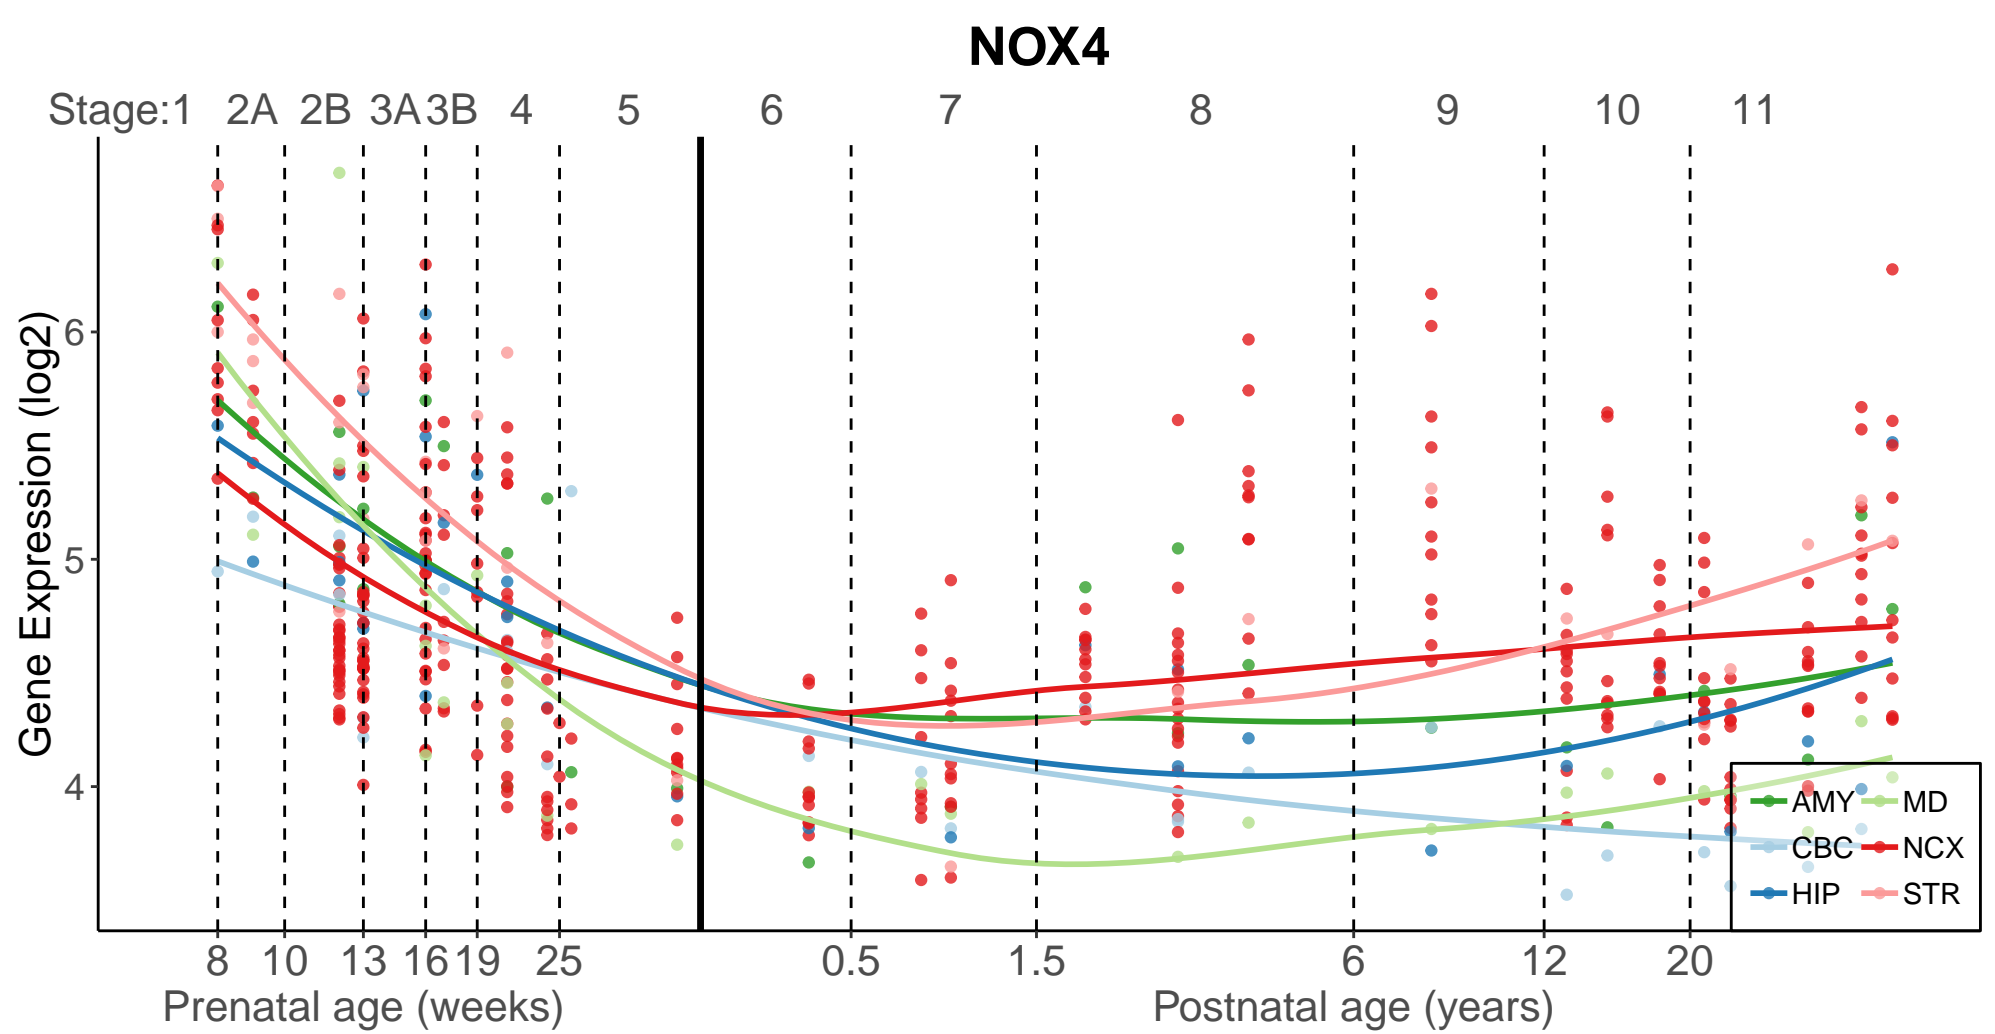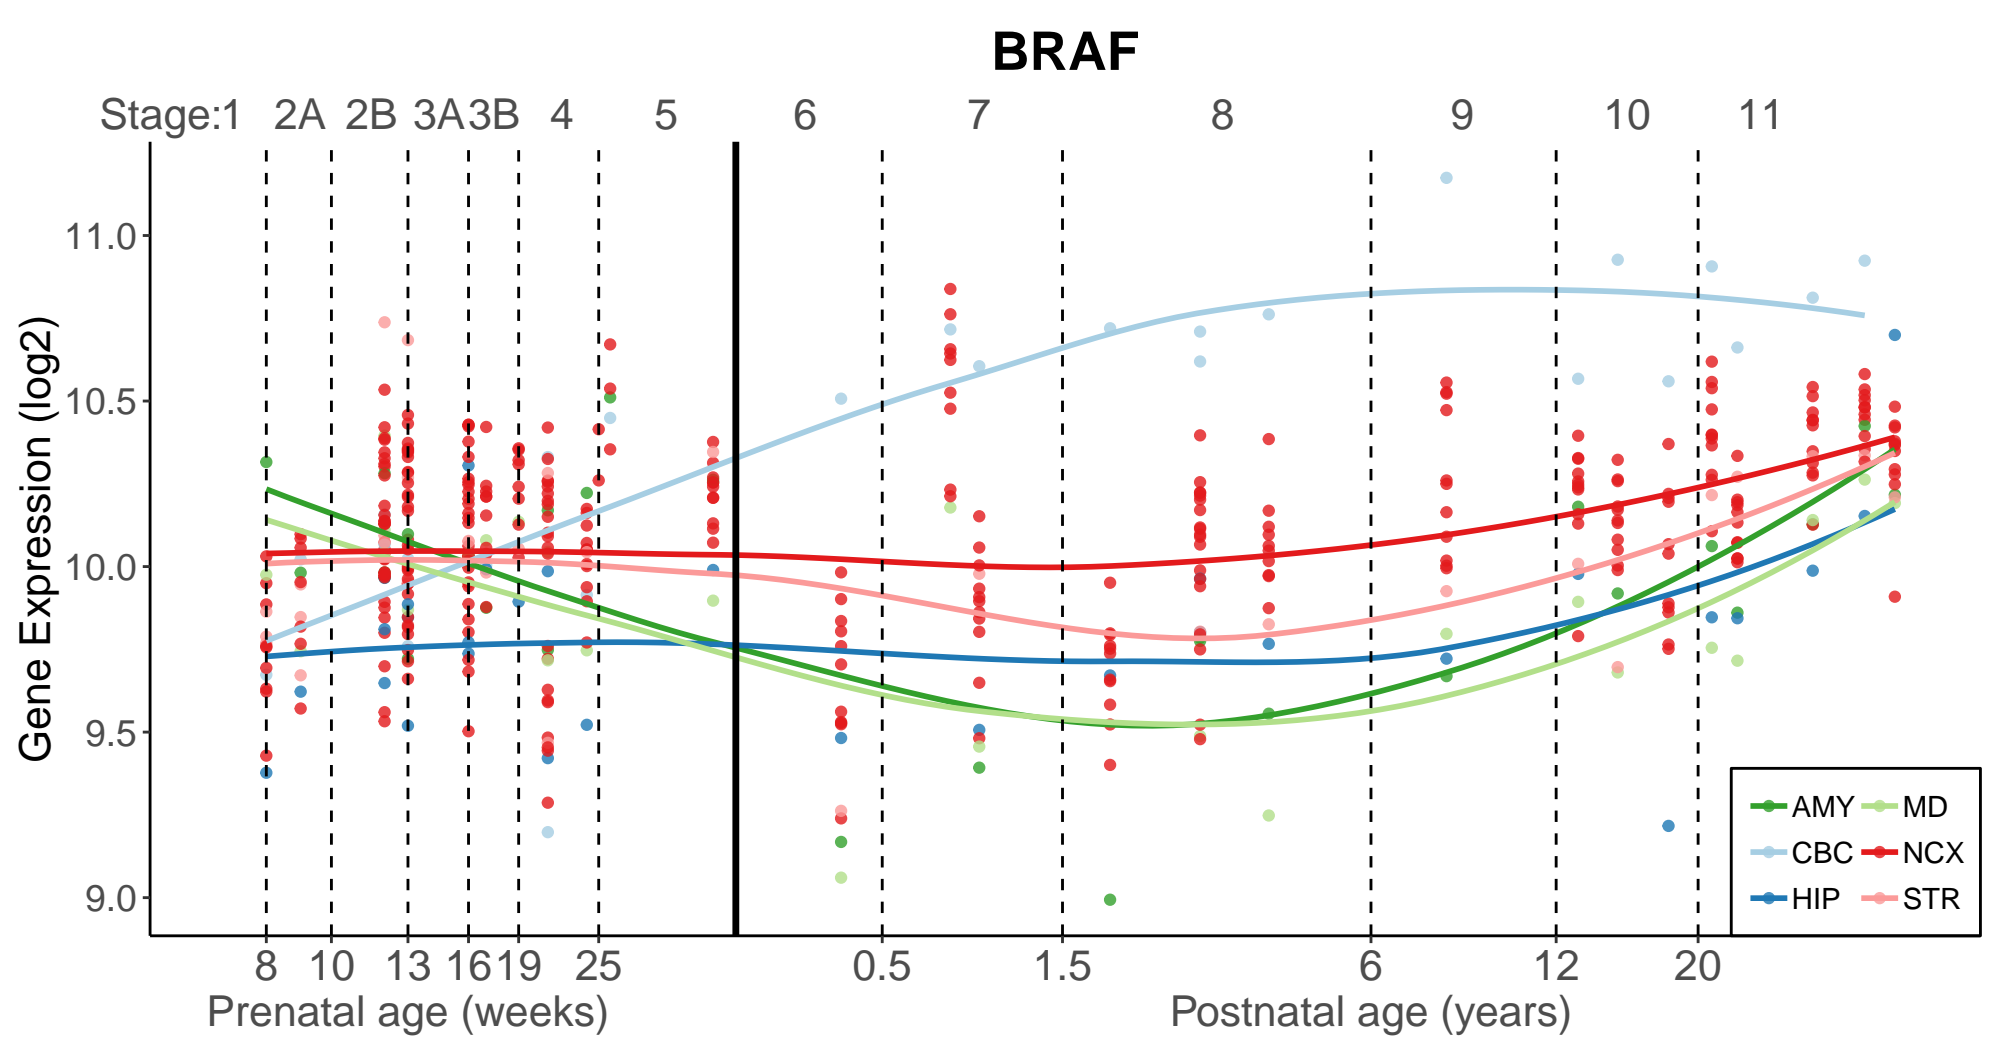

Supplement: NIHMS1065204-supplement-Figure_S3.pdf [file NIHMS1065204-supplement-Figure_S3.pdf]

**Fig S4. Brain Expression**

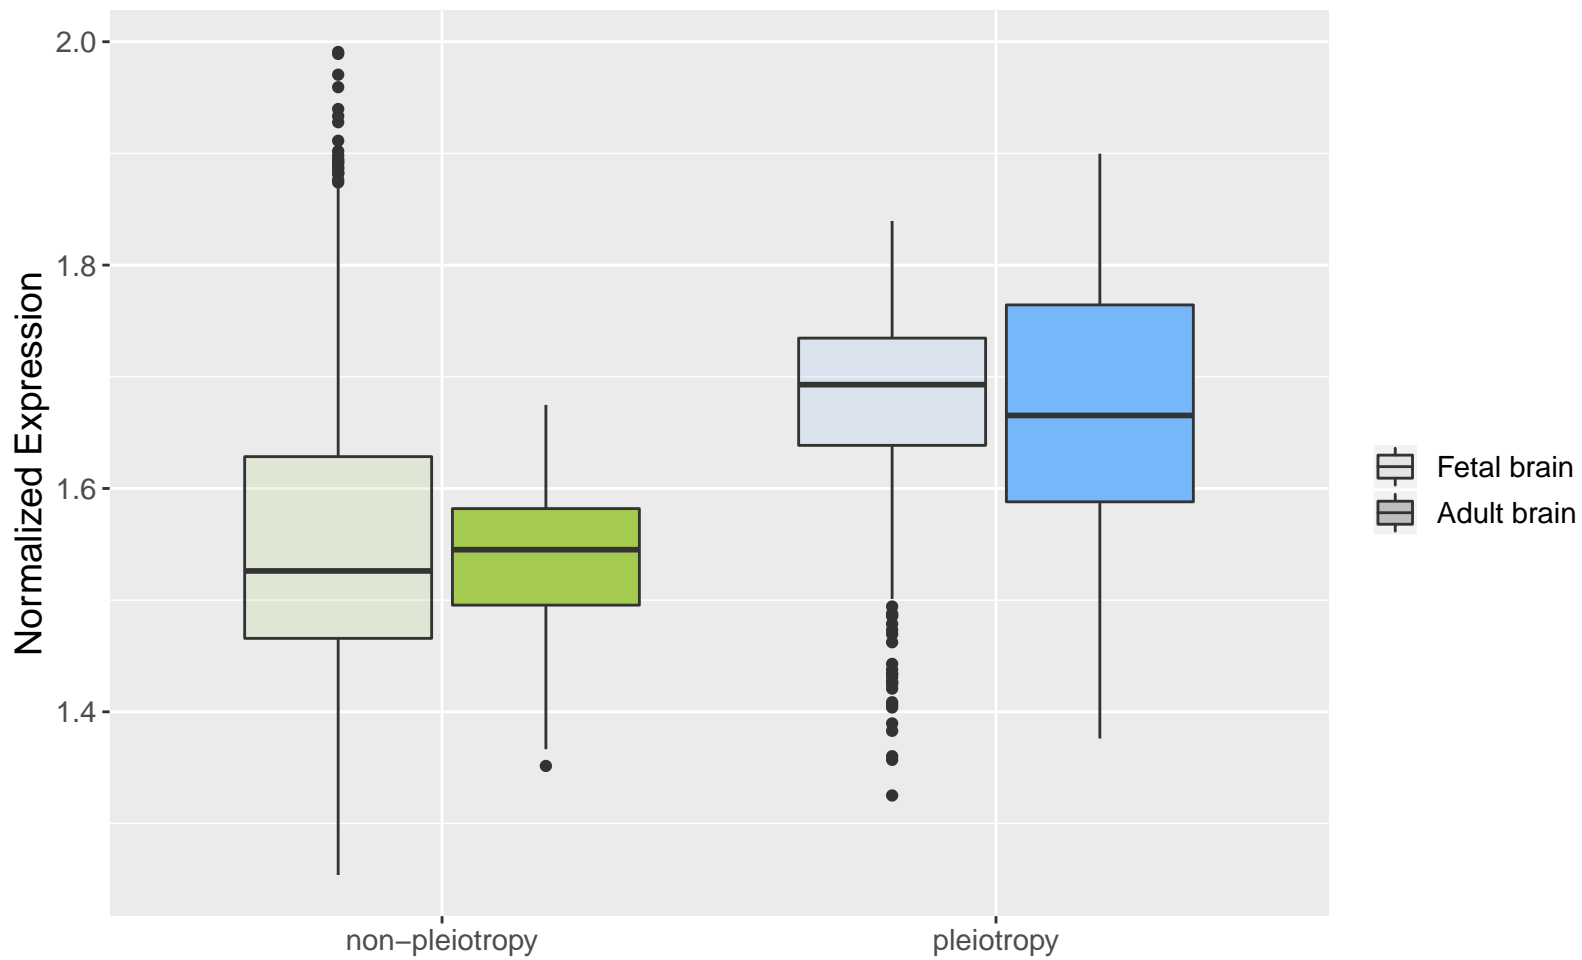

Supplement: NIHMS1065204-supplement-Figure_S4.pdf [file NIHMS1065204-supplement-Figure_S4.pdf]
